# Supplementary material for: Novel method for hurricane trajectory prediction based on data mining
Source: Copernicus journal article supplement (doi:10.5194/nhess-13-3211-2013), 2013-12-10
Supplement: Supplementary file 1 [file nhess-13-3211-2013-supplement.pdf]

|      |      |    |             |      |      |    |     |
|------|------|----|-------------|------|------|----|-----|
| 1900 | 8 27 | 0  | 1 NOT NAMED | 15.0 | 42.1 | 35 | 0   |
| 1900 | 8 27 | 6  | 1 NOT NAMED | 15.2 | 43.4 | 35 | 0   |
| 1900 | 8 27 | 12 | 1 NOT NAMED | 15.3 | 44.7 | 35 | 0   |
| 1900 | 8 27 | 18 | 1 NOT NAMED | 15.4 | 45.6 | 35 | 0   |
| 1900 | 8 28 | 0  | 1 NOT NAMED | 15.6 | 46.6 | 35 | 0   |
| 1900 | 8 28 | 6  | 1 NOT NAMED | 15.8 | 47.9 | 35 | 0   |
| 1900 | 8 28 | 12 | 1 NOT NAMED | 16.0 | 49.1 | 35 | 0   |
| 1900 | 8 28 | 18 | 1 NOT NAMED | 16.1 | 50.3 | 35 | 0   |
| 1900 | 8 29 | 0  | 1 NOT NAMED | 16.3 | 51.4 | 35 | 0   |
| 1900 | 8 29 | 6  | 1 NOT NAMED | 16.4 | 52.4 | 35 | 0   |
| 1900 | 8 29 | 12 | 1 NOT NAMED | 16.5 | 53.7 | 40 | 0   |
| 1900 | 8 29 | 18 | 1 NOT NAMED | 16.6 | 55.1 | 40 | 0   |
| 1900 | 8 30 | 0  | 1 NOT NAMED | 16.8 | 56.6 | 40 | 0   |
| 1900 | 8 30 | 6  | 1 NOT NAMED | 16.9 | 58.0 | 40 | 0   |
| 1900 | 8 30 | 12 | 1 NOT NAMED | 17.0 | 59.3 | 45 | 0   |
| 1900 | 8 30 | 18 | 1 NOT NAMED | 17.0 | 60.6 | 45 | 0   |
| 1900 | 8 31 | 0  | 1 NOT NAMED | 17.1 | 61.9 | 45 | 0   |
| 1900 | 8 31 | 6  | 1 NOT NAMED | 17.2 | 63.3 | 45 | 0   |
| 1900 | 8 31 | 12 | 1 NOT NAMED | 17.3 | 64.7 | 45 | 0   |
| 1900 | 8 31 | 18 | 1 NOT NAMED | 17.4 | 65.6 | 45 | 0   |
| 1900 | 9 1  | 0  | 1 NOT NAMED | 17.5 | 66.4 | 45 | 0   |
| 1900 | 9 1  | 6  | 1 NOT NAMED | 17.6 | 67.4 | 45 | 0   |
| 1900 | 9 1  | 12 | 1 NOT NAMED | 17.7 | 68.3 | 45 | 0   |
| 1900 | 9 1  | 18 | 1 NOT NAMED | 18.0 | 69.2 | 40 | 0   |
| 1900 | 9 2  | 0  | 1 NOT NAMED | 18.3 | 70.3 | 40 | 0   |
| 1900 | 9 2  | 6  | 1 NOT NAMED | 18.7 | 71.3 | 35 | 0   |
| 1900 | 9 2  | 12 | 1 NOT NAMED | 19.0 | 72.3 | 35 | 0   |
| 1900 | 9 2  | 18 | 1 NOT NAMED | 19.3 | 73.2 | 35 | 0   |
| 1900 | 9 3  | 0  | 1 NOT NAMED | 19.5 | 74.1 | 35 | 0   |
| 1900 | 9 3  | 6  | 1 NOT NAMED | 19.7 | 75.0 | 35 | 0   |
| 1900 | 9 3  | 12 | 1 NOT NAMED | 20.0 | 76.0 | 35 | 0   |
| 1900 | 9 3  | 18 | 1 NOT NAMED | 20.3 | 76.6 | 35 | 0   |
| 1900 | 9 4  | 0  | 1 NOT NAMED | 20.6 | 77.2 | 35 | 0   |
| 1900 | 9 4  | 6  | 1 NOT NAMED | 21.0 | 77.7 | 35 | 0   |
| 1900 | 9 4  | 12 | 1 NOT NAMED | 21.3 | 78.3 | 35 | 0   |
| 1900 | 9 4  | 18 | 1 NOT NAMED | 21.6 | 78.9 | 35 | 0   |
| 1900 | 9 5  | 0  | 1 NOT NAMED | 22.0 | 79.5 | 35 | 0   |
| 1900 | 9 5  | 6  | 1 NOT NAMED | 22.4 | 80.1 | 35 | 0   |
| 1900 | 9 5  | 12 | 1 NOT NAMED | 23.0 | 80.7 | 45 | 0   |
| 1900 | 9 5  | 18 | 1 NOT NAMED | 23.5 | 81.5 | 55 | 0   |
| 1900 | 9 6  | 0  | 1 NOT NAMED | 24.1 | 82.3 | 60 | 0   |
| 1900 | 9 6  | 6  | 1 NOT NAMED | 24.8 | 83.2 | 65 | 0   |
| 1900 | 9 6  | 12 | 1 NOT NAMED | 25.5 | 84.1 | 75 | 0   |
| 1900 | 9 6  | 18 | 1 NOT NAMED | 26.1 | 85.2 | 85 | 974 |

|      |   |    |    |   |           |      |      |     |     |
|------|---|----|----|---|-----------|------|------|-----|-----|
| 1900 | 9 | 7  | 0  | 1 | NOT NAMED | 26.5 | 86.2 | 95  | 0   |
| 1900 | 9 | 7  | 6  | 1 | NOT NAMED | 26.8 | 87.4 | 105 | 0   |
| 1900 | 9 | 7  | 12 | 1 | NOT NAMED | 27.0 | 88.7 | 115 | 0   |
| 1900 | 9 | 7  | 18 | 1 | NOT NAMED | 27.2 | 89.7 | 125 | 0   |
| 1900 | 9 | 8  | 0  | 1 | NOT NAMED | 27.4 | 90.6 | 125 | 0   |
| 1900 | 9 | 8  | 6  | 1 | NOT NAMED | 27.6 | 91.5 | 125 | 0   |
| 1900 | 9 | 8  | 12 | 1 | NOT NAMED | 27.8 | 92.4 | 125 | 0   |
| 1900 | 9 | 8  | 18 | 1 | NOT NAMED | 28.2 | 93.5 | 125 | 0   |
| 1900 | 9 | 9  | 0  | 1 | NOT NAMED | 28.9 | 94.7 | 125 | 936 |
| 1900 | 9 | 9  | 6  | 1 | NOT NAMED | 29.8 | 95.9 | 90  | 0   |
| 1900 | 9 | 9  | 12 | 1 | NOT NAMED | 31.0 | 96.9 | 65  | 0   |
| 1900 | 9 | 9  | 18 | 1 | NOT NAMED | 32.2 | 97.6 | 50  | 0   |
| 1900 | 9 | 10 | 0  | 1 | NOT NAMED | 33.4 | 97.8 | 45  | 0   |
| 1900 | 9 | 10 | 6  | 1 | NOT NAMED | 34.7 | 97.8 | 40  | 0   |
| 1900 | 9 | 10 | 12 | 1 | NOT NAMED | 36.0 | 97.6 | 35  | 0   |
| 1900 | 9 | 10 | 18 | 1 | NOT NAMED | 37.4 | 97.3 | 30  | 0   |
| 1900 | 9 | 11 | 0  | 1 | NOT NAMED | 38.8 | 96.5 | 30  | 0   |
| 1900 | 9 | 11 | 6  | 1 | NOT NAMED | 40.2 | 95.1 | 30  | 0   |
| 1900 | 9 | 11 | 12 | 1 | NOT NAMED | 41.5 | 92.4 | 40  | 0   |
| 1900 | 9 | 11 | 18 | 1 | NOT NAMED | 42.6 | 88.6 | 50  | 0   |
| 1900 | 9 | 12 | 0  | 1 | NOT NAMED | 43.4 | 84.2 | 55  | 0   |
| 1900 | 9 | 12 | 6  | 1 | NOT NAMED | 44.3 | 79.4 | 60  | 0   |
| 1900 | 9 | 12 | 12 | 1 | NOT NAMED | 45.2 | 74.5 | 65  | 0   |
| 1900 | 9 | 12 | 18 | 1 | NOT NAMED | 46.3 | 69.3 | 65  | 0   |
| 1900 | 9 | 13 | 0  | 1 | NOT NAMED | 47.5 | 64.0 | 65  | 0   |
| 1900 | 9 | 13 | 6  | 1 | NOT NAMED | 48.6 | 58.7 | 65  | 0   |
| 1900 | 9 | 13 | 12 | 1 | NOT NAMED | 49.7 | 53.9 | 65  | 0   |
| 1900 | 9 | 13 | 18 | 1 | NOT NAMED | 50.6 | 49.8 | 60  | 0   |
| 1900 | 9 | 14 | 0  | 1 | NOT NAMED | 51.4 | 46.2 | 55  | 0   |
| 1900 | 9 | 14 | 6  | 1 | NOT NAMED | 52.1 | 43.0 | 50  | 0   |
| 1900 | 9 | 14 | 12 | 1 | NOT NAMED | 53.0 | 40.0 | 45  | 0   |
| 1900 | 9 | 14 | 18 | 1 | NOT NAMED | 54.1 | 37.2 | 45  | 0   |
| 1900 | 9 | 15 | 0  | 1 | NOT NAMED | 55.3 | 34.6 | 45  | 0   |
| 1900 | 9 | 15 | 6  | 1 | NOT NAMED | 56.7 | 32.2 | 40  | 0   |
| 1900 | 9 | 15 | 12 | 1 | NOT NAMED | 58.2 | 30.0 | 40  | 0   |
| 1900 | 9 | 15 | 18 | 1 | NOT NAMED | 60.0 | 28.0 | 35  | 0   |
| 1900 | 9 | 7  | 0  | 2 | NOT NAMED | 14.5 | 28.0 | 35  | 0   |
| 1900 | 9 | 7  | 6  | 2 | NOT NAMED | 14.7 | 29.5 | 40  | 0   |
| 1900 | 9 | 7  | 12 | 2 | NOT NAMED | 15.0 | 31.0 | 45  | 0   |
| 1900 | 9 | 7  | 18 | 2 | NOT NAMED | 15.2 | 32.3 | 50  | 0   |
| 1900 | 9 | 8  | 0  | 2 | NOT NAMED | 15.3 | 33.6 | 55  | 0   |
| 1900 | 9 | 8  | 6  | 2 | NOT NAMED | 15.4 | 34.8 | 60  | 0   |
| 1900 | 9 | 8  | 12 | 2 | NOT NAMED | 15.5 | 36.0 | 60  | 0   |
| 1900 | 9 | 8  | 18 | 2 | NOT NAMED | 15.7 | 37.3 | 60  | 0   |

|      |   |    |    |             |      |      |     |   |
|------|---|----|----|-------------|------|------|-----|---|
| 1900 | 9 | 9  | 0  | 2 NOT NAMED | 15.8 | 38.6 | 60  | 0 |
| 1900 | 9 | 9  | 6  | 2 NOT NAMED | 15.9 | 39.8 | 60  | 0 |
| 1900 | 9 | 9  | 12 | 2 NOT NAMED | 16.0 | 41.0 | 60  | 0 |
| 1900 | 9 | 9  | 18 | 2 NOT NAMED | 16.2 | 42.3 | 60  | 0 |
| 1900 | 9 | 10 | 0  | 2 NOT NAMED | 16.3 | 43.6 | 60  | 0 |
| 1900 | 9 | 10 | 6  | 2 NOT NAMED | 16.4 | 44.8 | 60  | 0 |
| 1900 | 9 | 10 | 12 | 2 NOT NAMED | 16.5 | 46.0 | 60  | 0 |
| 1900 | 9 | 10 | 18 | 2 NOT NAMED | 16.7 | 47.2 | 60  | 0 |
| 1900 | 9 | 11 | 0  | 2 NOT NAMED | 16.8 | 48.3 | 60  | 0 |
| 1900 | 9 | 11 | 6  | 2 NOT NAMED | 16.9 | 49.4 | 60  | 0 |
| 1900 | 9 | 11 | 12 | 2 NOT NAMED | 17.0 | 50.5 | 60  | 0 |
| 1900 | 9 | 11 | 18 | 2 NOT NAMED | 17.2 | 51.7 | 60  | 0 |
| 1900 | 9 | 12 | 0  | 2 NOT NAMED | 17.3 | 52.8 | 60  | 0 |
| 1900 | 9 | 12 | 6  | 2 NOT NAMED | 17.4 | 53.9 | 60  | 0 |
| 1900 | 9 | 12 | 12 | 2 NOT NAMED | 17.5 | 55.0 | 60  | 0 |
| 1900 | 9 | 12 | 18 | 2 NOT NAMED | 17.7 | 56.1 | 60  | 0 |
| 1900 | 9 | 13 | 0  | 2 NOT NAMED | 18.0 | 57.2 | 60  | 0 |
| 1900 | 9 | 13 | 6  | 2 NOT NAMED | 18.5 | 58.3 | 60  | 0 |
| 1900 | 9 | 13 | 12 | 2 NOT NAMED | 19.0 | 59.3 | 65  | 0 |
| 1900 | 9 | 13 | 18 | 2 NOT NAMED | 19.5 | 60.0 | 70  | 0 |
| 1900 | 9 | 14 | 0  | 2 NOT NAMED | 20.0 | 60.6 | 75  | 0 |
| 1900 | 9 | 14 | 6  | 2 NOT NAMED | 20.5 | 61.3 | 80  | 0 |
| 1900 | 9 | 14 | 12 | 2 NOT NAMED | 21.0 | 62.0 | 80  | 0 |
| 1900 | 9 | 14 | 18 | 2 NOT NAMED | 21.4 | 62.5 | 85  | 0 |
| 1900 | 9 | 15 | 0  | 2 NOT NAMED | 21.8 | 63.1 | 85  | 0 |
| 1900 | 9 | 15 | 6  | 2 NOT NAMED | 22.2 | 63.5 | 85  | 0 |
| 1900 | 9 | 15 | 12 | 2 NOT NAMED | 22.7 | 64.0 | 85  | 0 |
| 1900 | 9 | 15 | 18 | 2 NOT NAMED | 23.4 | 64.7 | 85  | 0 |
| 1900 | 9 | 16 | 0  | 2 NOT NAMED | 23.8 | 65.0 | 90  | 0 |
| 1900 | 9 | 16 | 6  | 2 NOT NAMED | 24.3 | 65.3 | 95  | 0 |
| 1900 | 9 | 16 | 12 | 2 NOT NAMED | 25.0 | 65.5 | 100 | 0 |
| 1900 | 9 | 16 | 18 | 2 NOT NAMED | 26.0 | 65.7 | 105 | 0 |
| 1900 | 9 | 17 | 0  | 2 NOT NAMED | 27.1 | 65.6 | 105 | 0 |
| 1900 | 9 | 17 | 6  | 2 NOT NAMED | 28.2 | 65.4 | 105 | 0 |
| 1900 | 9 | 17 | 12 | 2 NOT NAMED | 29.3 | 65.0 | 100 | 0 |
| 1900 | 9 | 17 | 18 | 2 NOT NAMED | 31.1 | 64.1 | 95  | 0 |
| 1900 | 9 | 18 | 0  | 2 NOT NAMED | 33.2 | 62.6 | 85  | 0 |
| 1900 | 9 | 18 | 6  | 2 NOT NAMED | 35.1 | 60.4 | 75  | 0 |
| 1900 | 9 | 18 | 12 | 2 NOT NAMED | 36.5 | 58.0 | 65  | 0 |
| 1900 | 9 | 18 | 18 | 2 NOT NAMED | 38.0 | 56.0 | 50  | 0 |
| 1900 | 9 | 19 | 0  | 2 NOT NAMED | 39.7 | 53.3 | 35  | 0 |
| 1900 | 9 | 19 | 6  | 2 NOT NAMED | 41.5 | 49.8 | 30  | 0 |
| 1900 | 9 | 8  | 12 | 3 NOT NAMED | 10.0 | 18.5 | 40  | 0 |
| 1900 | 9 | 8  | 18 | 3 NOT NAMED | 10.3 | 19.4 | 45  | 0 |

|      |   |    |    |             |      |      |    |   |
|------|---|----|----|-------------|------|------|----|---|
| 1900 | 9 | 9  | 0  | 3 NOT NAMED | 10.6 | 20.3 | 50 | 0 |
| 1900 | 9 | 9  | 6  | 3 NOT NAMED | 10.9 | 21.2 | 55 | 0 |
| 1900 | 9 | 9  | 12 | 3 NOT NAMED | 11.2 | 22.1 | 60 | 0 |
| 1900 | 9 | 9  | 18 | 3 NOT NAMED | 11.6 | 23.0 | 65 | 0 |
| 1900 | 9 | 10 | 0  | 3 NOT NAMED | 12.0 | 23.9 | 70 | 0 |
| 1900 | 9 | 10 | 6  | 3 NOT NAMED | 12.5 | 24.8 | 70 | 0 |
| 1900 | 9 | 10 | 12 | 3 NOT NAMED | 13.0 | 25.7 | 70 | 0 |
| 1900 | 9 | 10 | 18 | 3 NOT NAMED | 13.5 | 26.3 | 70 | 0 |
| 1900 | 9 | 11 | 0  | 3 NOT NAMED | 14.0 | 27.0 | 70 | 0 |
| 1900 | 9 | 11 | 6  | 3 NOT NAMED | 14.5 | 27.7 | 70 | 0 |
| 1900 | 9 | 11 | 12 | 3 NOT NAMED | 15.0 | 28.3 | 75 | 0 |
| 1900 | 9 | 11 | 18 | 3 NOT NAMED | 15.5 | 29.1 | 80 | 0 |
| 1900 | 9 | 12 | 0  | 3 NOT NAMED | 15.9 | 29.9 | 85 | 0 |
| 1900 | 9 | 12 | 6  | 3 NOT NAMED | 16.4 | 30.6 | 85 | 0 |
| 1900 | 9 | 12 | 12 | 3 NOT NAMED | 17.1 | 31.3 | 85 | 0 |
| 1900 | 9 | 12 | 18 | 3 NOT NAMED | 18.6 | 32.0 | 85 | 0 |
| 1900 | 9 | 13 | 0  | 3 NOT NAMED | 19.7 | 32.6 | 85 | 0 |
| 1900 | 9 | 13 | 6  | 3 NOT NAMED | 20.8 | 33.0 | 85 | 0 |
| 1900 | 9 | 13 | 12 | 3 NOT NAMED | 22.0 | 33.5 | 85 | 0 |
| 1900 | 9 | 13 | 18 | 3 NOT NAMED | 23.0 | 33.9 | 85 | 0 |
| 1900 | 9 | 14 | 0  | 3 NOT NAMED | 24.0 | 34.3 | 85 | 0 |
| 1900 | 9 | 14 | 6  | 3 NOT NAMED | 25.0 | 34.7 | 85 | 0 |
| 1900 | 9 | 14 | 12 | 3 NOT NAMED | 26.0 | 35.0 | 85 | 0 |
| 1900 | 9 | 14 | 18 | 3 NOT NAMED | 26.9 | 34.6 | 85 | 0 |
| 1900 | 9 | 15 | 0  | 3 NOT NAMED | 28.1 | 33.9 | 80 | 0 |
| 1900 | 9 | 15 | 6  | 3 NOT NAMED | 29.0 | 33.1 | 75 | 0 |
| 1900 | 9 | 15 | 12 | 3 NOT NAMED | 29.7 | 32.3 | 75 | 0 |
| 1900 | 9 | 15 | 18 | 3 NOT NAMED | 30.0 | 31.8 | 75 | 0 |
| 1900 | 9 | 16 | 0  | 3 NOT NAMED | 30.2 | 31.3 | 75 | 0 |
| 1900 | 9 | 16 | 6  | 3 NOT NAMED | 30.4 | 30.7 | 75 | 0 |
| 1900 | 9 | 16 | 12 | 3 NOT NAMED | 30.4 | 30.0 | 75 | 0 |
| 1900 | 9 | 16 | 18 | 3 NOT NAMED | 30.3 | 29.5 | 75 | 0 |
| 1900 | 9 | 17 | 0  | 3 NOT NAMED | 30.1 | 29.0 | 75 | 0 |
| 1900 | 9 | 17 | 6  | 3 NOT NAMED | 29.5 | 28.8 | 75 | 0 |
| 1900 | 9 | 17 | 12 | 3 NOT NAMED | 29.0 | 29.0 | 75 | 0 |
| 1900 | 9 | 17 | 18 | 3 NOT NAMED | 28.8 | 29.5 | 75 | 0 |
| 1900 | 9 | 18 | 0  | 3 NOT NAMED | 28.6 | 30.1 | 75 | 0 |
| 1900 | 9 | 18 | 6  | 3 NOT NAMED | 28.4 | 30.7 | 75 | 0 |
| 1900 | 9 | 18 | 12 | 3 NOT NAMED | 28.2 | 31.5 | 70 | 0 |
| 1900 | 9 | 18 | 18 | 3 NOT NAMED | 27.8 | 32.5 | 70 | 0 |
| 1900 | 9 | 19 | 0  | 3 NOT NAMED | 27.2 | 33.7 | 65 | 0 |
| 1900 | 9 | 19 | 6  | 3 NOT NAMED | 26.7 | 34.9 | 65 | 0 |
| 1900 | 9 | 19 | 12 | 3 NOT NAMED | 26.5 | 36.5 | 65 | 0 |
| 1900 | 9 | 19 | 18 | 3 NOT NAMED | 26.6 | 38.1 | 65 | 0 |

|      |      |    |             |      |      |    |   |
|------|------|----|-------------|------|------|----|---|
| 1900 | 9 20 | 0  | 3 NOT NAMED | 27.0 | 39.9 | 65 | 0 |
| 1900 | 9 20 | 6  | 3 NOT NAMED | 27.5 | 41.6 | 60 | 0 |
| 1900 | 9 20 | 12 | 3 NOT NAMED | 28.0 | 43.0 | 50 | 0 |
| 1900 | 9 20 | 18 | 3 NOT NAMED | 28.4 | 44.2 | 45 | 0 |
| 1900 | 9 21 | 0  | 3 NOT NAMED | 28.9 | 45.1 | 40 | 0 |
| 1900 | 9 21 | 6  | 3 NOT NAMED | 29.3 | 45.9 | 40 | 0 |
| 1900 | 9 21 | 12 | 3 NOT NAMED | 29.6 | 46.6 | 35 | 0 |
| 1900 | 9 21 | 18 | 3 NOT NAMED | 29.8 | 47.2 | 35 | 0 |
| 1900 | 9 22 | 0  | 3 NOT NAMED | 29.9 | 47.7 | 35 | 0 |
| 1900 | 9 22 | 6  | 3 NOT NAMED | 30.0 | 48.3 | 35 | 0 |
| 1900 | 9 22 | 12 | 3 NOT NAMED | 30.1 | 48.9 | 35 | 0 |
| 1900 | 9 22 | 18 | 3 NOT NAMED | 30.2 | 49.5 | 30 | 0 |
| 1900 | 9 23 | 0  | 3 NOT NAMED | 30.3 | 50.2 | 30 | 0 |
| 1900 | 9 23 | 6  | 3 NOT NAMED | 30.3 | 50.8 | 25 | 0 |
| 1900 | 9 23 | 12 | 3 NOT NAMED | 30.4 | 51.5 | 25 | 0 |
| 1900 | 9 23 | 18 | 3 NOT NAMED | 30.6 | 52.2 | 20 | 0 |
| 1900 | 9 11 | 0  | 4 NOT NAMED | 20.0 | 85.2 | 35 | 0 |
| 1900 | 9 11 | 6  | 4 NOT NAMED | 20.9 | 86.0 | 40 | 0 |
| 1900 | 9 11 | 12 | 4 NOT NAMED | 21.8 | 87.0 | 40 | 0 |
| 1900 | 9 11 | 18 | 4 NOT NAMED | 22.8 | 87.6 | 45 | 0 |
| 1900 | 9 12 | 0  | 4 NOT NAMED | 23.8 | 88.2 | 45 | 0 |
| 1900 | 9 12 | 6  | 4 NOT NAMED | 24.8 | 88.7 | 45 | 0 |
| 1900 | 9 12 | 12 | 4 NOT NAMED | 26.0 | 89.3 | 45 | 0 |
| 1900 | 9 12 | 18 | 4 NOT NAMED | 27.0 | 89.7 | 45 | 0 |
| 1900 | 9 13 | 0  | 4 NOT NAMED | 28.1 | 89.8 | 45 | 0 |
| 1900 | 9 13 | 6  | 4 NOT NAMED | 29.1 | 89.5 | 40 | 0 |
| 1900 | 9 13 | 12 | 4 NOT NAMED | 30.0 | 89.0 | 35 | 0 |
| 1900 | 9 13 | 18 | 4 NOT NAMED | 30.5 | 88.6 | 35 | 0 |
| 1900 | 9 14 | 0  | 4 NOT NAMED | 31.0 | 88.3 | 30 | 0 |
| 1900 | 9 14 | 6  | 4 NOT NAMED | 31.5 | 87.8 | 30 | 0 |
| 1900 | 9 14 | 12 | 4 NOT NAMED | 32.0 | 87.4 | 30 | 0 |
| 1900 | 9 14 | 18 | 4 NOT NAMED | 32.4 | 86.9 | 30 | 0 |
| 1900 | 9 15 | 0  | 4 NOT NAMED | 32.8 | 86.3 | 25 | 0 |
| 1900 | 9 15 | 6  | 4 NOT NAMED | 33.3 | 85.5 | 25 | 0 |
| 1900 | 9 15 | 12 | 4 NOT NAMED | 33.7 | 84.7 | 25 | 0 |
| 1900 | 9 15 | 18 | 4 NOT NAMED | 34.0 | 83.3 | 25 | 0 |
| 1900 | 10 4 | 6  | 5 NOT NAMED | 21.2 | 61.3 | 30 | 0 |
| 1900 | 10 4 | 12 | 5 NOT NAMED | 22.2 | 62.3 | 30 | 0 |
| 1900 | 10 4 | 18 | 5 NOT NAMED | 23.2 | 62.8 | 30 | 0 |
| 1900 | 10 5 | 0  | 5 NOT NAMED | 24.2 | 63.1 | 30 | 0 |
| 1900 | 10 5 | 6  | 5 NOT NAMED | 25.1 | 63.7 | 30 | 0 |
| 1900 | 10 5 | 12 | 5 NOT NAMED | 25.9 | 64.4 | 30 | 0 |
| 1900 | 10 5 | 18 | 5 NOT NAMED | 26.3 | 65.3 | 30 | 0 |
| 1900 | 10 6 | 0  | 5 NOT NAMED | 26.7 | 66.2 | 30 | 0 |

|      |    |    |    |             |      |      |    |   |
|------|----|----|----|-------------|------|------|----|---|
| 1900 | 10 | 6  | 6  | 5 NOT NAMED | 27.0 | 67.1 | 30 | 0 |
| 1900 | 10 | 6  | 12 | 5 NOT NAMED | 27.2 | 68.0 | 30 | 0 |
| 1900 | 10 | 6  | 18 | 5 NOT NAMED | 27.3 | 68.8 | 30 | 0 |
| 1900 | 10 | 7  | 0  | 5 NOT NAMED | 27.3 | 69.5 | 35 | 0 |
| 1900 | 10 | 7  | 6  | 5 NOT NAMED | 27.3 | 70.2 | 35 | 0 |
| 1900 | 10 | 7  | 12 | 5 NOT NAMED | 27.4 | 70.9 | 40 | 0 |
| 1900 | 10 | 7  | 18 | 5 NOT NAMED | 27.5 | 71.6 | 45 | 0 |
| 1900 | 10 | 8  | 0  | 5 NOT NAMED | 27.5 | 72.4 | 50 | 0 |
| 1900 | 10 | 8  | 6  | 5 NOT NAMED | 27.1 | 72.9 | 50 | 0 |
| 1900 | 10 | 8  | 12 | 5 NOT NAMED | 26.5 | 73.0 | 55 | 0 |
| 1900 | 10 | 8  | 18 | 5 NOT NAMED | 26.4 | 72.1 | 55 | 0 |
| 1900 | 10 | 9  | 0  | 5 NOT NAMED | 26.9 | 71.5 | 60 | 0 |
| 1900 | 10 | 9  | 6  | 5 NOT NAMED | 27.6 | 71.1 | 60 | 0 |
| 1900 | 10 | 9  | 12 | 5 NOT NAMED | 29.0 | 70.5 | 60 | 0 |
| 1900 | 10 | 9  | 18 | 5 NOT NAMED | 30.7 | 69.5 | 60 | 0 |
| 1900 | 10 | 10 | 0  | 5 NOT NAMED | 33.4 | 68.8 | 60 | 0 |
| 1900 | 10 | 10 | 6  | 5 NOT NAMED | 36.4 | 68.5 | 55 | 0 |
| 1900 | 10 | 10 | 12 | 5 NOT NAMED | 38.5 | 68.5 | 50 | 0 |
| 1900 | 10 | 10 | 18 | 5 NOT NAMED | 39.8 | 68.5 | 45 | 0 |
| 1900 | 10 | 11 | 0  | 5 NOT NAMED | 41.2 | 68.5 | 40 | 0 |
| 1900 | 10 | 11 | 6  | 5 NOT NAMED | 42.8 | 68.1 | 40 | 0 |
| 1900 | 10 | 11 | 12 | 5 NOT NAMED | 44.0 | 67.0 | 40 | 0 |
| 1900 | 10 | 11 | 18 | 5 NOT NAMED | 45.2 | 63.9 | 40 | 0 |
| 1900 | 10 | 12 | 0  | 5 NOT NAMED | 46.0 | 60.6 | 40 | 0 |
| 1900 | 10 | 12 | 6  | 5 NOT NAMED | 47.1 | 58.4 | 40 | 0 |
| 1900 | 10 | 12 | 12 | 5 NOT NAMED | 48.5 | 56.5 | 40 | 0 |
| 1900 | 10 | 12 | 18 | 5 NOT NAMED | 49.7 | 54.9 | 40 | 0 |
| 1900 | 10 | 13 | 0  | 5 NOT NAMED | 51.1 | 53.1 | 35 | 0 |
| 1900 | 10 | 13 | 6  | 5 NOT NAMED | 52.3 | 51.6 | 35 | 0 |
| 1900 | 10 | 13 | 12 | 5 NOT NAMED | 53.7 | 50.0 | 35 | 0 |
| 1900 | 10 | 13 | 18 | 5 NOT NAMED | 55.3 | 48.2 | 35 | 0 |
| 1900 | 10 | 14 | 0  | 5 NOT NAMED | 56.8 | 46.8 | 35 | 0 |
| 1900 | 10 | 14 | 6  | 5 NOT NAMED | 58.2 | 45.7 | 35 | 0 |
| 1900 | 10 | 14 | 12 | 5 NOT NAMED | 59.5 | 45.1 | 35 | 0 |
| 1900 | 10 | 10 | 6  | 6 NOT NAMED | 21.0 | 91.4 | 35 | 0 |
| 1900 | 10 | 10 | 12 | 6 NOT NAMED | 22.0 | 91.0 | 35 | 0 |
| 1900 | 10 | 10 | 18 | 6 NOT NAMED | 23.5 | 90.7 | 35 | 0 |
| 1900 | 10 | 11 | 0  | 6 NOT NAMED | 24.8 | 90.2 | 35 | 0 |
| 1900 | 10 | 11 | 6  | 6 NOT NAMED | 26.1 | 89.4 | 40 | 0 |
| 1900 | 10 | 11 | 12 | 6 NOT NAMED | 27.3 | 88.5 | 40 | 0 |
| 1900 | 10 | 11 | 18 | 6 NOT NAMED | 28.5 | 86.6 | 40 | 0 |
| 1900 | 10 | 12 | 0  | 6 NOT NAMED | 29.2 | 84.2 | 40 | 0 |
| 1900 | 10 | 12 | 6  | 6 NOT NAMED | 30.0 | 82.4 | 35 | 0 |
| 1900 | 10 | 12 | 12 | 6 NOT NAMED | 31.1 | 80.8 | 35 | 0 |

|      |    |    |    |   |           |      |      |    |   |
|------|----|----|----|---|-----------|------|------|----|---|
| 1900 | 10 | 12 | 18 | 6 | NOT NAMED | 32.2 | 79.3 | 35 | 0 |
| 1900 | 10 | 13 | 0  | 6 | NOT NAMED | 33.4 | 78.0 | 35 | 0 |
| 1900 | 10 | 13 | 6  | 6 | NOT NAMED | 34.6 | 76.6 | 35 | 0 |
| 1900 | 10 | 13 | 12 | 6 | NOT NAMED | 35.8 | 75.4 | 35 | 0 |
| 1900 | 10 | 13 | 18 | 6 | NOT NAMED | 36.9 | 74.9 | 35 | 0 |
| 1900 | 10 | 14 | 0  | 6 | NOT NAMED | 38.0 | 74.5 | 35 | 0 |
| 1900 | 10 | 14 | 6  | 6 | NOT NAMED | 39.2 | 74.1 | 35 | 0 |
| 1900 | 10 | 14 | 12 | 6 | NOT NAMED | 40.3 | 73.7 | 35 | 0 |
| 1900 | 10 | 14 | 18 | 6 | NOT NAMED | 41.9 | 72.4 | 30 | 0 |
| 1900 | 10 | 15 | 0  | 6 | NOT NAMED | 44.1 | 70.7 | 30 | 0 |
| 1900 | 10 | 15 | 6  | 6 | NOT NAMED | 46.8 | 68.6 | 25 | 0 |
| 1900 | 10 | 15 | 12 | 6 | NOT NAMED | 49.7 | 66.1 | 25 | 0 |
| 1900 | 10 | 15 | 18 | 6 | NOT NAMED | 52.8 | 63.8 | 25 | 0 |
| 1900 | 10 | 24 | 0  | 7 | NOT NAMED | 15.0 | 64.5 | 30 | 0 |
| 1900 | 10 | 24 | 6  | 7 | NOT NAMED | 15.5 | 65.2 | 30 | 0 |
| 1900 | 10 | 24 | 12 | 7 | NOT NAMED | 16.0 | 66.0 | 30 | 0 |
| 1900 | 10 | 24 | 18 | 7 | NOT NAMED | 16.5 | 66.8 | 30 | 0 |
| 1900 | 10 | 25 | 0  | 7 | NOT NAMED | 17.0 | 67.6 | 30 | 0 |
| 1900 | 10 | 25 | 6  | 7 | NOT NAMED | 17.5 | 68.5 | 30 | 0 |
| 1900 | 10 | 25 | 12 | 7 | NOT NAMED | 18.0 | 69.5 | 30 | 0 |
| 1900 | 10 | 25 | 18 | 7 | NOT NAMED | 18.5 | 70.5 | 30 | 0 |
| 1900 | 10 | 26 | 0  | 7 | NOT NAMED | 19.0 | 71.5 | 30 | 0 |
| 1900 | 10 | 26 | 6  | 7 | NOT NAMED | 19.5 | 72.5 | 30 | 0 |
| 1900 | 10 | 26 | 12 | 7 | NOT NAMED | 20.0 | 73.3 | 35 | 0 |
| 1900 | 10 | 26 | 18 | 7 | NOT NAMED | 20.6 | 73.9 | 40 | 0 |
| 1900 | 10 | 27 | 0  | 7 | NOT NAMED | 21.2 | 74.4 | 40 | 0 |
| 1900 | 10 | 27 | 6  | 7 | NOT NAMED | 21.8 | 74.8 | 40 | 0 |
| 1900 | 10 | 27 | 12 | 7 | NOT NAMED | 22.5 | 75.0 | 40 | 0 |
| 1900 | 10 | 27 | 18 | 7 | NOT NAMED | 23.6 | 74.8 | 45 | 0 |
| 1900 | 10 | 28 | 0  | 7 | NOT NAMED | 25.6 | 74.4 | 45 | 0 |
| 1900 | 10 | 28 | 6  | 7 | NOT NAMED | 27.2 | 73.8 | 45 | 0 |
| 1900 | 10 | 28 | 12 | 7 | NOT NAMED | 29.0 | 72.8 | 45 | 0 |
| 1900 | 10 | 28 | 18 | 7 | NOT NAMED | 31.5 | 71.4 | 45 | 0 |
| 1900 | 10 | 29 | 0  | 7 | NOT NAMED | 34.8 | 69.3 | 45 | 0 |
| 1900 | 10 | 29 | 6  | 7 | NOT NAMED | 38.0 | 67.3 | 45 | 0 |
| 1900 | 10 | 29 | 12 | 7 | NOT NAMED | 41.5 | 65.0 | 45 | 0 |
| 1900 | 10 | 29 | 18 | 7 | NOT NAMED | 45.0 | 63.0 | 45 | 0 |
| 1901 | 6  | 11 | 0  | 1 | NOT NAMED | 19.3 | 82.3 | 25 | 0 |
| 1901 | 6  | 11 | 6  | 1 | NOT NAMED | 20.0 | 83.0 | 25 | 0 |
| 1901 | 6  | 11 | 12 | 1 | NOT NAMED | 20.7 | 83.5 | 30 | 0 |
| 1901 | 6  | 11 | 18 | 1 | NOT NAMED | 21.4 | 83.9 | 30 | 0 |
| 1901 | 6  | 12 | 0  | 1 | NOT NAMED | 22.1 | 84.3 | 35 | 0 |
| 1901 | 6  | 12 | 6  | 1 | NOT NAMED | 22.9 | 84.7 | 35 | 0 |
| 1901 | 6  | 12 | 12 | 1 | NOT NAMED | 24.0 | 85.0 | 35 | 0 |

|      |   |    |    |   |           |      |      |    |   |
|------|---|----|----|---|-----------|------|------|----|---|
| 1901 | 6 | 12 | 18 | 1 | NOT NAMED | 25.1 | 85.2 | 35 | 0 |
| 1901 | 6 | 13 | 0  | 1 | NOT NAMED | 26.1 | 85.2 | 35 | 0 |
| 1901 | 6 | 13 | 6  | 1 | NOT NAMED | 27.4 | 85.0 | 35 | 0 |
| 1901 | 6 | 13 | 12 | 1 | NOT NAMED | 28.5 | 84.7 | 35 | 0 |
| 1901 | 6 | 13 | 18 | 1 | NOT NAMED | 29.5 | 84.6 | 35 | 0 |
| 1901 | 6 | 14 | 0  | 1 | NOT NAMED | 30.5 | 84.7 | 30 | 0 |
| 1901 | 6 | 14 | 6  | 1 | NOT NAMED | 31.5 | 84.8 | 30 | 0 |
| 1901 | 6 | 14 | 12 | 1 | NOT NAMED | 32.5 | 85.0 | 25 | 0 |
| 1901 | 6 | 14 | 18 | 1 | NOT NAMED | 33.8 | 85.4 | 25 | 0 |
| 1901 | 6 | 15 | 0  | 1 | NOT NAMED | 34.9 | 86.2 | 25 | 0 |
| 1901 | 6 | 15 | 6  | 1 | NOT NAMED | 35.9 | 87.0 | 25 | 0 |
| 1901 | 6 | 15 | 12 | 1 | NOT NAMED | 37.0 | 88.0 | 25 | 0 |
| 1901 | 6 | 15 | 18 | 1 | NOT NAMED | 38.5 | 89.7 | 25 | 0 |
| 1901 | 7 | 1  | 12 | 2 | NOT NAMED | 9.0  | 54.0 | 35 | 0 |
| 1901 | 7 | 1  | 18 | 2 | NOT NAMED | 9.5  | 55.0 | 35 | 0 |
| 1901 | 7 | 2  | 0  | 2 | NOT NAMED | 10.2 | 56.2 | 35 | 0 |
| 1901 | 7 | 2  | 6  | 2 | NOT NAMED | 10.8 | 57.4 | 35 | 0 |
| 1901 | 7 | 2  | 12 | 2 | NOT NAMED | 11.5 | 58.7 | 35 | 0 |
| 1901 | 7 | 2  | 18 | 2 | NOT NAMED | 12.3 | 60.1 | 35 | 0 |
| 1901 | 7 | 3  | 0  | 2 | NOT NAMED | 13.2 | 61.9 | 35 | 0 |
| 1901 | 7 | 3  | 6  | 2 | NOT NAMED | 14.2 | 63.6 | 40 | 0 |
| 1901 | 7 | 3  | 12 | 2 | NOT NAMED | 15.3 | 65.7 | 40 | 0 |
| 1901 | 7 | 3  | 18 | 2 | NOT NAMED | 15.9 | 67.4 | 40 | 0 |
| 1901 | 7 | 4  | 0  | 2 | NOT NAMED | 16.3 | 69.2 | 45 | 0 |
| 1901 | 7 | 4  | 6  | 2 | NOT NAMED | 16.6 | 70.8 | 50 | 0 |
| 1901 | 7 | 4  | 12 | 2 | NOT NAMED | 17.0 | 72.5 | 55 | 0 |
| 1901 | 7 | 4  | 18 | 2 | NOT NAMED | 17.4 | 73.6 | 55 | 0 |
| 1901 | 7 | 5  | 0  | 2 | NOT NAMED | 17.8 | 74.6 | 60 | 0 |
| 1901 | 7 | 5  | 6  | 2 | NOT NAMED | 18.3 | 75.5 | 60 | 0 |
| 1901 | 7 | 5  | 12 | 2 | NOT NAMED | 18.7 | 76.5 | 60 | 0 |
| 1901 | 7 | 5  | 18 | 2 | NOT NAMED | 18.9 | 77.4 | 60 | 0 |
| 1901 | 7 | 6  | 0  | 2 | NOT NAMED | 19.2 | 78.3 | 60 | 0 |
| 1901 | 7 | 6  | 6  | 2 | NOT NAMED | 19.4 | 79.3 | 60 | 0 |
| 1901 | 7 | 6  | 12 | 2 | NOT NAMED | 19.7 | 80.3 | 60 | 0 |
| 1901 | 7 | 6  | 18 | 2 | NOT NAMED | 20.1 | 81.0 | 60 | 0 |
| 1901 | 7 | 7  | 0  | 2 | NOT NAMED | 20.6 | 81.9 | 60 | 0 |
| 1901 | 7 | 7  | 6  | 2 | NOT NAMED | 21.0 | 82.6 | 60 | 0 |
| 1901 | 7 | 7  | 12 | 2 | NOT NAMED | 21.5 | 83.5 | 60 | 0 |
| 1901 | 7 | 7  | 18 | 2 | NOT NAMED | 21.9 | 84.3 | 60 | 0 |
| 1901 | 7 | 8  | 0  | 2 | NOT NAMED | 22.2 | 85.0 | 60 | 0 |
| 1901 | 7 | 8  | 6  | 2 | NOT NAMED | 22.6 | 85.9 | 60 | 0 |
| 1901 | 7 | 8  | 12 | 2 | NOT NAMED | 23.0 | 87.0 | 60 | 0 |
| 1901 | 7 | 8  | 18 | 2 | NOT NAMED | 23.5 | 87.9 | 60 | 0 |
| 1901 | 7 | 9  | 0  | 2 | NOT NAMED | 24.1 | 88.7 | 60 | 0 |



|      |   |    |    |   |           |      |      |    |   |
|------|---|----|----|---|-----------|------|------|----|---|
| 1901 | 7 | 9  | 6  | 2 | NOT NAMED | 24.8 | 89.6 | 60 | 0 |
| 1901 | 7 | 9  | 12 | 2 | NOT NAMED | 25.3 | 90.5 | 60 | 0 |
| 1901 | 7 | 9  | 18 | 2 | NOT NAMED | 26.0 | 91.9 | 60 | 0 |
| 1901 | 7 | 10 | 0  | 2 | NOT NAMED | 26.9 | 93.5 | 55 | 0 |
| 1901 | 7 | 10 | 6  | 2 | NOT NAMED | 27.9 | 95.0 | 50 | 0 |
| 1901 | 7 | 10 | 12 | 2 | NOT NAMED | 28.9 | 96.5 | 35 | 0 |
| 1901 | 7 | 10 | 18 | 2 | NOT NAMED | 30.0 | 97.8 | 30 | 0 |
| 1901 | 7 | 4  | 0  | 3 | NOT NAMED | 9.5  | 55.5 | 30 | 0 |
| 1901 | 7 | 4  | 6  | 3 | NOT NAMED | 10.2 | 55.8 | 35 | 0 |
| 1901 | 7 | 4  | 12 | 3 | NOT NAMED | 11.0 | 56.3 | 30 | 0 |
| 1901 | 7 | 4  | 18 | 3 | NOT NAMED | 11.8 | 57.0 | 30 | 0 |
| 1901 | 7 | 5  | 0  | 3 | NOT NAMED | 12.5 | 57.8 | 35 | 0 |
| 1901 | 7 | 5  | 6  | 3 | NOT NAMED | 13.2 | 58.7 | 35 | 0 |
| 1901 | 7 | 5  | 12 | 3 | NOT NAMED | 13.7 | 59.7 | 35 | 0 |
| 1901 | 7 | 5  | 18 | 3 | NOT NAMED | 14.4 | 60.8 | 35 | 0 |
| 1901 | 7 | 6  | 0  | 3 | NOT NAMED | 15.0 | 61.9 | 35 | 0 |
| 1901 | 7 | 6  | 6  | 3 | NOT NAMED | 15.5 | 63.0 | 40 | 0 |
| 1901 | 7 | 6  | 12 | 3 | NOT NAMED | 15.9 | 64.1 | 45 | 0 |
| 1901 | 7 | 6  | 18 | 3 | NOT NAMED | 16.6 | 65.1 | 50 | 0 |
| 1901 | 7 | 7  | 0  | 3 | NOT NAMED | 17.4 | 66.3 | 55 | 0 |
| 1901 | 7 | 7  | 6  | 3 | NOT NAMED | 18.2 | 67.6 | 60 | 0 |
| 1901 | 7 | 7  | 12 | 3 | NOT NAMED | 19.0 | 69.0 | 60 | 0 |
| 1901 | 7 | 7  | 18 | 3 | NOT NAMED | 20.0 | 70.2 | 60 | 0 |
| 1901 | 7 | 8  | 0  | 3 | NOT NAMED | 21.3 | 71.3 | 60 | 0 |
| 1901 | 7 | 8  | 6  | 3 | NOT NAMED | 22.8 | 72.2 | 60 | 0 |
| 1901 | 7 | 8  | 12 | 3 | NOT NAMED | 24.5 | 73.3 | 60 | 0 |
| 1901 | 7 | 8  | 18 | 3 | NOT NAMED | 26.4 | 74.5 | 60 | 0 |
| 1901 | 7 | 9  | 0  | 3 | NOT NAMED | 27.7 | 75.8 | 60 | 0 |
| 1901 | 7 | 9  | 6  | 3 | NOT NAMED | 29.0 | 76.6 | 60 | 0 |
| 1901 | 7 | 9  | 12 | 3 | NOT NAMED | 30.5 | 76.7 | 60 | 0 |
| 1901 | 7 | 9  | 18 | 3 | NOT NAMED | 31.8 | 75.9 | 60 | 0 |
| 1901 | 7 | 10 | 0  | 3 | NOT NAMED | 33.0 | 75.1 | 65 | 0 |
| 1901 | 7 | 10 | 6  | 3 | NOT NAMED | 33.7 | 74.2 | 70 | 0 |
| 1901 | 7 | 10 | 12 | 3 | NOT NAMED | 34.6 | 73.8 | 70 | 0 |
| 1901 | 7 | 10 | 18 | 3 | NOT NAMED | 35.7 | 73.8 | 70 | 0 |
| 1901 | 7 | 11 | 0  | 3 | NOT NAMED | 36.1 | 74.6 | 70 | 0 |
| 1901 | 7 | 11 | 6  | 3 | NOT NAMED | 36.1 | 75.6 | 70 | 0 |
| 1901 | 7 | 11 | 12 | 3 | NOT NAMED | 35.6 | 76.2 | 60 | 0 |
| 1901 | 7 | 11 | 18 | 3 | NOT NAMED | 35.3 | 76.4 | 50 | 0 |
| 1901 | 7 | 12 | 0  | 3 | NOT NAMED | 34.7 | 76.6 | 40 | 0 |
| 1901 | 7 | 12 | 6  | 3 | NOT NAMED | 34.2 | 76.8 | 40 | 0 |
| 1901 | 7 | 12 | 12 | 3 | NOT NAMED | 34.0 | 77.1 | 35 | 0 |
| 1901 | 7 | 12 | 18 | 3 | NOT NAMED | 33.9 | 77.6 | 35 | 0 |
| 1901 | 7 | 13 | 0  | 3 | NOT NAMED | 34.0 | 78.1 | 35 | 0 |

|      |   |    |    |   |           |      |      |    |   |
|------|---|----|----|---|-----------|------|------|----|---|
| 1901 | 7 | 13 | 6  | 3 | NOT NAMED | 34.2 | 78.8 | 35 | 0 |
| 1901 | 7 | 13 | 12 | 3 | NOT NAMED | 34.5 | 79.5 | 35 | 0 |
| 1901 | 7 | 13 | 18 | 3 | NOT NAMED | 34.8 | 80.2 | 30 | 0 |
| 1901 | 8 | 2  | 0  | 4 | NOT NAMED | 32.6 | 38.4 | 25 | 0 |
| 1901 | 8 | 2  | 6  | 4 | NOT NAMED | 32.3 | 39.1 | 25 | 0 |
| 1901 | 8 | 2  | 12 | 4 | NOT NAMED | 32.0 | 40.0 | 25 | 0 |
| 1901 | 8 | 2  | 18 | 4 | NOT NAMED | 31.6 | 41.1 | 25 | 0 |
| 1901 | 8 | 3  | 0  | 4 | NOT NAMED | 31.1 | 42.3 | 25 | 0 |
| 1901 | 8 | 3  | 6  | 4 | NOT NAMED | 30.5 | 43.7 | 25 | 0 |
| 1901 | 8 | 3  | 12 | 4 | NOT NAMED | 30.0 | 45.0 | 25 | 0 |
| 1901 | 8 | 3  | 18 | 4 | NOT NAMED | 29.3 | 46.3 | 25 | 0 |
| 1901 | 8 | 4  | 0  | 4 | NOT NAMED | 28.6 | 47.3 | 30 | 0 |
| 1901 | 8 | 4  | 6  | 4 | NOT NAMED | 27.7 | 48.8 | 30 | 0 |
| 1901 | 8 | 4  | 12 | 4 | NOT NAMED | 27.0 | 50.0 | 30 | 0 |
| 1901 | 8 | 4  | 18 | 4 | NOT NAMED | 26.3 | 51.6 | 30 | 0 |
| 1901 | 8 | 5  | 0  | 4 | NOT NAMED | 25.6 | 53.2 | 30 | 0 |
| 1901 | 8 | 5  | 6  | 4 | NOT NAMED | 24.9 | 54.8 | 30 | 0 |
| 1901 | 8 | 5  | 12 | 4 | NOT NAMED | 24.5 | 56.5 | 30 | 0 |
| 1901 | 8 | 5  | 18 | 4 | NOT NAMED | 24.2 | 57.9 | 30 | 0 |
| 1901 | 8 | 6  | 0  | 4 | NOT NAMED | 23.9 | 59.3 | 30 | 0 |
| 1901 | 8 | 6  | 6  | 4 | NOT NAMED | 23.7 | 60.8 | 30 | 0 |
| 1901 | 8 | 6  | 12 | 4 | NOT NAMED | 23.7 | 62.3 | 30 | 0 |
| 1901 | 8 | 6  | 18 | 4 | NOT NAMED | 23.9 | 63.9 | 30 | 0 |
| 1901 | 8 | 7  | 0  | 4 | NOT NAMED | 24.2 | 65.7 | 30 | 0 |
| 1901 | 8 | 7  | 6  | 4 | NOT NAMED | 24.6 | 67.5 | 30 | 0 |
| 1901 | 8 | 7  | 12 | 4 | NOT NAMED | 25.0 | 69.0 | 30 | 0 |
| 1901 | 8 | 7  | 18 | 4 | NOT NAMED | 25.3 | 70.2 | 30 | 0 |
| 1901 | 8 | 8  | 0  | 4 | NOT NAMED | 25.5 | 71.6 | 30 | 0 |
| 1901 | 8 | 8  | 6  | 4 | NOT NAMED | 25.5 | 72.7 | 30 | 0 |
| 1901 | 8 | 8  | 12 | 4 | NOT NAMED | 25.5 | 74.0 | 30 | 0 |
| 1901 | 8 | 8  | 18 | 4 | NOT NAMED | 25.4 | 74.5 | 30 | 0 |
| 1901 | 8 | 9  | 0  | 4 | NOT NAMED | 25.0 | 75.0 | 35 | 0 |
| 1901 | 8 | 9  | 6  | 4 | NOT NAMED | 25.0 | 75.6 | 35 | 0 |
| 1901 | 8 | 9  | 12 | 4 | NOT NAMED | 25.2 | 76.4 | 40 | 0 |
| 1901 | 8 | 9  | 18 | 4 | NOT NAMED | 25.3 | 77.1 | 40 | 0 |
| 1901 | 8 | 10 | 0  | 4 | NOT NAMED | 25.4 | 77.8 | 40 | 0 |
| 1901 | 8 | 10 | 6  | 4 | NOT NAMED | 25.6 | 78.4 | 40 | 0 |
| 1901 | 8 | 10 | 12 | 4 | NOT NAMED | 25.8 | 79.0 | 40 | 0 |
| 1901 | 8 | 10 | 18 | 4 | NOT NAMED | 26.1 | 79.6 | 40 | 0 |
| 1901 | 8 | 11 | 0  | 4 | NOT NAMED | 26.4 | 80.4 | 35 | 0 |
| 1901 | 8 | 11 | 6  | 4 | NOT NAMED | 26.7 | 81.3 | 35 | 0 |
| 1901 | 8 | 11 | 12 | 4 | NOT NAMED | 26.9 | 82.1 | 40 | 0 |
| 1901 | 8 | 11 | 18 | 4 | NOT NAMED | 27.0 | 82.7 | 45 | 0 |
| 1901 | 8 | 12 | 0  | 4 | NOT NAMED | 27.2 | 83.2 | 50 | 0 |

|      |      |    |             |      |      |    |     |
|------|------|----|-------------|------|------|----|-----|
| 1901 | 8 12 | 6  | 4 NOT NAMED | 27.3 | 83.7 | 55 | 0   |
| 1901 | 8 12 | 12 | 4 NOT NAMED | 27.4 | 84.2 | 65 | 0   |
| 1901 | 8 12 | 18 | 4 NOT NAMED | 27.4 | 84.8 | 70 | 0   |
| 1901 | 8 13 | 0  | 4 NOT NAMED | 27.5 | 85.4 | 75 | 0   |
| 1901 | 8 13 | 6  | 4 NOT NAMED | 27.5 | 86.0 | 80 | 0   |
| 1901 | 8 13 | 12 | 4 NOT NAMED | 27.5 | 86.7 | 80 | 0   |
| 1901 | 8 13 | 18 | 4 NOT NAMED | 27.6 | 87.6 | 80 | 0   |
| 1901 | 8 14 | 0  | 4 NOT NAMED | 27.9 | 88.7 | 80 | 0   |
| 1901 | 8 14 | 6  | 4 NOT NAMED | 28.3 | 89.3 | 80 | 0   |
| 1901 | 8 14 | 12 | 4 NOT NAMED | 28.7 | 89.7 | 80 | 0   |
| 1901 | 8 14 | 18 | 4 NOT NAMED | 29.1 | 89.8 | 80 | 0   |
| 1901 | 8 15 | 0  | 4 NOT NAMED | 29.4 | 89.5 | 80 | 0   |
| 1901 | 8 15 | 6  | 4 NOT NAMED | 29.7 | 89.2 | 80 | 0   |
| 1901 | 8 15 | 12 | 4 NOT NAMED | 30.0 | 89.0 | 80 | 0   |
| 1901 | 8 15 | 18 | 4 NOT NAMED | 30.5 | 88.7 | 70 | 973 |
| 1901 | 8 16 | 0  | 4 NOT NAMED | 31.0 | 88.3 | 60 | 0   |
| 1901 | 8 16 | 6  | 4 NOT NAMED | 31.5 | 88.1 | 45 | 0   |
| 1901 | 8 16 | 12 | 4 NOT NAMED | 32.0 | 88.0 | 40 | 0   |
| 1901 | 8 16 | 18 | 4 NOT NAMED | 33.0 | 88.7 | 35 | 0   |
| 1901 | 8 17 | 0  | 4 NOT NAMED | 34.0 | 89.5 | 30 | 0   |
| 1901 | 8 17 | 6  | 4 NOT NAMED | 35.0 | 90.0 | 30 | 0   |
| 1901 | 8 17 | 12 | 4 NOT NAMED | 36.3 | 89.9 | 25 | 0   |
| 1901 | 8 17 | 18 | 4 NOT NAMED | 37.1 | 89.3 | 25 | 0   |
| 1901 | 8 18 | 0  | 4 NOT NAMED | 37.8 | 88.7 | 25 | 0   |
| 1901 | 8 18 | 6  | 4 NOT NAMED | 38.4 | 87.8 | 25 | 0   |
| 1901 | 8 18 | 12 | 4 NOT NAMED | 39.0 | 86.8 | 25 | 0   |
| 1901 | 8 18 | 18 | 4 NOT NAMED | 39.8 | 85.4 | 25 | 0   |
| 1901 | 8 18 | 12 | 5 NOT NAMED | 11.5 | 53.0 | 30 | 0   |
| 1901 | 8 18 | 18 | 5 NOT NAMED | 11.6 | 54.0 | 30 | 0   |
| 1901 | 8 19 | 0  | 5 NOT NAMED | 11.7 | 54.8 | 30 | 0   |
| 1901 | 8 19 | 6  | 5 NOT NAMED | 11.9 | 55.7 | 30 | 0   |
| 1901 | 8 19 | 12 | 5 NOT NAMED | 12.0 | 56.7 | 35 | 0   |
| 1901 | 8 19 | 18 | 5 NOT NAMED | 12.1 | 57.7 | 35 | 0   |
| 1901 | 8 20 | 0  | 5 NOT NAMED | 12.2 | 58.6 | 40 | 0   |
| 1901 | 8 20 | 6  | 5 NOT NAMED | 12.2 | 59.5 | 40 | 0   |
| 1901 | 8 20 | 12 | 5 NOT NAMED | 12.3 | 60.3 | 45 | 0   |
| 1901 | 8 20 | 18 | 5 NOT NAMED | 12.3 | 61.2 | 45 | 0   |
| 1901 | 8 21 | 0  | 5 NOT NAMED | 12.4 | 62.2 | 40 | 0   |
| 1901 | 8 21 | 6  | 5 NOT NAMED | 12.4 | 63.3 | 35 | 0   |
| 1901 | 8 21 | 12 | 5 NOT NAMED | 12.5 | 64.5 | 30 | 0   |
| 1901 | 8 21 | 18 | 5 NOT NAMED | 12.6 | 65.8 | 30 | 0   |
| 1901 | 8 22 | 0  | 5 NOT NAMED | 12.6 | 67.1 | 25 | 0   |
| 1901 | 8 22 | 6  | 5 NOT NAMED | 12.6 | 68.3 | 25 | 0   |
| 1901 | 8 22 | 12 | 5 NOT NAMED | 12.7 | 69.5 | 25 | 0   |

|      |   |    |    |   |           |      |      |    |   |
|------|---|----|----|---|-----------|------|------|----|---|
| 1901 | 8 | 22 | 18 | 5 | NOT NAMED | 12.8 | 71.0 | 25 | 0 |
| 1901 | 8 | 29 | 6  | 6 | NOT NAMED | 13.6 | 22.4 | 30 | 0 |
| 1901 | 8 | 29 | 12 | 6 | NOT NAMED | 13.7 | 24.0 | 35 | 0 |
| 1901 | 8 | 29 | 18 | 6 | NOT NAMED | 13.9 | 25.9 | 35 | 0 |
| 1901 | 8 | 30 | 0  | 6 | NOT NAMED | 14.1 | 27.4 | 40 | 0 |
| 1901 | 8 | 30 | 6  | 6 | NOT NAMED | 14.2 | 28.8 | 40 | 0 |
| 1901 | 8 | 30 | 12 | 6 | NOT NAMED | 14.3 | 30.2 | 45 | 0 |
| 1901 | 8 | 30 | 18 | 6 | NOT NAMED | 14.4 | 31.5 | 45 | 0 |
| 1901 | 8 | 31 | 0  | 6 | NOT NAMED | 14.5 | 33.0 | 50 | 0 |
| 1901 | 8 | 31 | 6  | 6 | NOT NAMED | 14.7 | 34.5 | 50 | 0 |
| 1901 | 8 | 31 | 12 | 6 | NOT NAMED | 15.0 | 36.3 | 55 | 0 |
| 1901 | 8 | 31 | 18 | 6 | NOT NAMED | 15.1 | 37.7 | 55 | 0 |
| 1901 | 9 | 1  | 0  | 6 | NOT NAMED | 15.4 | 39.0 | 60 | 0 |
| 1901 | 9 | 1  | 6  | 6 | NOT NAMED | 15.7 | 40.4 | 60 | 0 |
| 1901 | 9 | 1  | 12 | 6 | NOT NAMED | 16.3 | 42.0 | 65 | 0 |
| 1901 | 9 | 1  | 18 | 6 | NOT NAMED | 16.8 | 43.2 | 65 | 0 |
| 1901 | 9 | 2  | 0  | 6 | NOT NAMED | 17.4 | 44.6 | 70 | 0 |
| 1901 | 9 | 2  | 6  | 6 | NOT NAMED | 18.0 | 46.0 | 70 | 0 |
| 1901 | 9 | 2  | 12 | 6 | NOT NAMED | 18.5 | 47.5 | 75 | 0 |
| 1901 | 9 | 2  | 18 | 6 | NOT NAMED | 18.9 | 48.8 | 75 | 0 |
| 1901 | 9 | 3  | 0  | 6 | NOT NAMED | 19.2 | 50.1 | 80 | 0 |
| 1901 | 9 | 3  | 6  | 6 | NOT NAMED | 19.6 | 51.4 | 80 | 0 |
| 1901 | 9 | 3  | 12 | 6 | NOT NAMED | 20.0 | 52.7 | 85 | 0 |
| 1901 | 9 | 3  | 18 | 6 | NOT NAMED | 20.7 | 54.2 | 85 | 0 |
| 1901 | 9 | 4  | 0  | 6 | NOT NAMED | 21.5 | 55.6 | 90 | 0 |
| 1901 | 9 | 4  | 6  | 6 | NOT NAMED | 22.6 | 57.0 | 90 | 0 |
| 1901 | 9 | 4  | 12 | 6 | NOT NAMED | 24.0 | 58.0 | 90 | 0 |
| 1901 | 9 | 4  | 18 | 6 | NOT NAMED | 25.0 | 58.4 | 90 | 0 |
| 1901 | 9 | 5  | 0  | 6 | NOT NAMED | 26.1 | 58.7 | 90 | 0 |
| 1901 | 9 | 5  | 6  | 6 | NOT NAMED | 27.1 | 58.9 | 90 | 0 |
| 1901 | 9 | 5  | 12 | 6 | NOT NAMED | 28.0 | 59.0 | 90 | 0 |
| 1901 | 9 | 5  | 18 | 6 | NOT NAMED | 28.8 | 59.1 | 90 | 0 |
| 1901 | 9 | 6  | 0  | 6 | NOT NAMED | 29.5 | 59.2 | 90 | 0 |
| 1901 | 9 | 6  | 6  | 6 | NOT NAMED | 30.1 | 59.1 | 90 | 0 |
| 1901 | 9 | 6  | 12 | 6 | NOT NAMED | 30.7 | 59.0 | 85 | 0 |
| 1901 | 9 | 6  | 18 | 6 | NOT NAMED | 31.6 | 58.6 | 85 | 0 |
| 1901 | 9 | 7  | 0  | 6 | NOT NAMED | 32.6 | 57.8 | 85 | 0 |
| 1901 | 9 | 7  | 6  | 6 | NOT NAMED | 33.6 | 57.0 | 85 | 0 |
| 1901 | 9 | 7  | 12 | 6 | NOT NAMED | 34.2 | 56.1 | 85 | 0 |
| 1901 | 9 | 7  | 18 | 6 | NOT NAMED | 34.7 | 55.3 | 85 | 0 |
| 1901 | 9 | 8  | 0  | 6 | NOT NAMED | 35.2 | 54.0 | 85 | 0 |
| 1901 | 9 | 8  | 6  | 6 | NOT NAMED | 35.6 | 52.0 | 80 | 0 |
| 1901 | 9 | 8  | 12 | 6 | NOT NAMED | 35.8 | 50.0 | 80 | 0 |
| 1901 | 9 | 8  | 18 | 6 | NOT NAMED | 36.0 | 47.5 | 80 | 0 |

|      |   |    |    |             |      |      |    |   |
|------|---|----|----|-------------|------|------|----|---|
| 1901 | 9 | 9  | 0  | 6 NOT NAMED | 36.0 | 44.4 | 80 | 0 |
| 1901 | 9 | 9  | 6  | 6 NOT NAMED | 36.2 | 41.3 | 80 | 0 |
| 1901 | 9 | 9  | 12 | 6 NOT NAMED | 37.0 | 39.0 | 80 | 0 |
| 1901 | 9 | 9  | 18 | 6 NOT NAMED | 38.1 | 37.4 | 75 | 0 |
| 1901 | 9 | 10 | 0  | 6 NOT NAMED | 39.5 | 35.7 | 70 | 0 |
| 1901 | 9 | 10 | 6  | 6 NOT NAMED | 41.0 | 33.8 | 70 | 0 |
| 1901 | 9 | 10 | 12 | 6 NOT NAMED | 43.0 | 32.0 | 65 | 0 |
| 1901 | 9 | 10 | 18 | 6 NOT NAMED | 44.4 | 30.9 | 65 | 0 |
| 1901 | 9 | 11 | 0  | 6 NOT NAMED | 45.8 | 29.3 | 55 | 0 |
| 1901 | 9 | 11 | 6  | 6 NOT NAMED | 47.3 | 27.7 | 45 | 0 |
| 1901 | 9 | 11 | 12 | 6 NOT NAMED | 48.6 | 25.0 | 40 | 0 |
| 1901 | 9 | 11 | 18 | 6 NOT NAMED | 49.2 | 20.0 | 35 | 0 |
| 1901 | 9 | 9  | 6  | 7 NOT NAMED | 17.6 | 50.7 | 35 | 0 |
| 1901 | 9 | 9  | 12 | 7 NOT NAMED | 17.5 | 52.0 | 35 | 0 |
| 1901 | 9 | 9  | 18 | 7 NOT NAMED | 17.5 | 53.2 | 35 | 0 |
| 1901 | 9 | 10 | 0  | 7 NOT NAMED | 17.4 | 54.6 | 35 | 0 |
| 1901 | 9 | 10 | 6  | 7 NOT NAMED | 17.4 | 56.0 | 35 | 0 |
| 1901 | 9 | 10 | 12 | 7 NOT NAMED | 17.3 | 57.3 | 35 | 0 |
| 1901 | 9 | 10 | 18 | 7 NOT NAMED | 17.4 | 58.8 | 35 | 0 |
| 1901 | 9 | 11 | 0  | 7 NOT NAMED | 17.5 | 60.1 | 35 | 0 |
| 1901 | 9 | 11 | 6  | 7 NOT NAMED | 17.6 | 61.3 | 40 | 0 |
| 1901 | 9 | 11 | 12 | 7 NOT NAMED | 17.8 | 62.7 | 45 | 0 |
| 1901 | 9 | 11 | 18 | 7 NOT NAMED | 18.1 | 64.3 | 50 | 0 |
| 1901 | 9 | 12 | 0  | 7 NOT NAMED | 18.4 | 65.6 | 50 | 0 |
| 1901 | 9 | 12 | 6  | 7 NOT NAMED | 18.5 | 66.9 | 50 | 0 |
| 1901 | 9 | 12 | 12 | 7 NOT NAMED | 18.6 | 68.2 | 50 | 0 |
| 1901 | 9 | 12 | 18 | 7 NOT NAMED | 18.7 | 69.6 | 40 | 0 |
| 1901 | 9 | 13 | 0  | 7 NOT NAMED | 18.8 | 71.0 | 35 | 0 |
| 1901 | 9 | 13 | 6  | 7 NOT NAMED | 18.9 | 72.6 | 35 | 0 |
| 1901 | 9 | 13 | 12 | 7 NOT NAMED | 19.0 | 74.3 | 45 | 0 |
| 1901 | 9 | 13 | 18 | 7 NOT NAMED | 19.1 | 75.7 | 50 | 0 |
| 1901 | 9 | 14 | 0  | 7 NOT NAMED | 19.2 | 77.0 | 55 | 0 |
| 1901 | 9 | 14 | 6  | 7 NOT NAMED | 19.4 | 78.3 | 60 | 0 |
| 1901 | 9 | 14 | 12 | 7 NOT NAMED | 19.7 | 79.5 | 65 | 0 |
| 1901 | 9 | 14 | 18 | 7 NOT NAMED | 20.1 | 80.6 | 65 | 0 |
| 1901 | 9 | 15 | 0  | 7 NOT NAMED | 20.5 | 81.9 | 70 | 0 |
| 1901 | 9 | 15 | 6  | 7 NOT NAMED | 21.0 | 83.3 | 70 | 0 |
| 1901 | 9 | 15 | 12 | 7 NOT NAMED | 21.5 | 84.5 | 70 | 0 |
| 1901 | 9 | 15 | 18 | 7 NOT NAMED | 22.0 | 85.6 | 65 | 0 |
| 1901 | 9 | 16 | 0  | 7 NOT NAMED | 22.6 | 86.5 | 60 | 0 |
| 1901 | 9 | 16 | 6  | 7 NOT NAMED | 23.3 | 87.3 | 55 | 0 |
| 1901 | 9 | 16 | 12 | 7 NOT NAMED | 24.3 | 88.0 | 50 | 0 |
| 1901 | 9 | 16 | 18 | 7 NOT NAMED | 25.3 | 88.5 | 50 | 0 |
| 1901 | 9 | 17 | 0  | 7 NOT NAMED | 26.5 | 88.5 | 50 | 0 |

|      |      |    |             |      |      |    |   |
|------|------|----|-------------|------|------|----|---|
| 1901 | 9 17 | 6  | 7 NOT NAMED | 27.7 | 88.1 | 50 | 0 |
| 1901 | 9 17 | 12 | 7 NOT NAMED | 29.0 | 87.5 | 50 | 0 |
| 1901 | 9 17 | 18 | 7 NOT NAMED | 30.3 | 86.7 | 50 | 0 |
| 1901 | 9 18 | 0  | 7 NOT NAMED | 31.6 | 85.3 | 40 | 0 |
| 1901 | 9 18 | 6  | 7 NOT NAMED | 32.5 | 83.4 | 35 | 0 |
| 1901 | 9 18 | 12 | 7 NOT NAMED | 33.0 | 81.2 | 35 | 0 |
| 1901 | 9 18 | 18 | 7 NOT NAMED | 34.2 | 77.0 | 35 | 0 |
| 1901 | 9 19 | 0  | 7 NOT NAMED | 35.8 | 74.2 | 40 | 0 |
| 1901 | 9 19 | 6  | 7 NOT NAMED | 37.1 | 72.5 | 45 | 0 |
| 1901 | 9 19 | 12 | 7 NOT NAMED | 38.7 | 70.0 | 50 | 0 |
| 1901 | 9 19 | 18 | 7 NOT NAMED | 40.5 | 67.2 | 50 | 0 |
| 1901 | 9 12 | 0  | 8 NOT NAMED | 11.1 | 28.1 | 35 | 0 |
| 1901 | 9 12 | 6  | 8 NOT NAMED | 11.5 | 28.5 | 35 | 0 |
| 1901 | 9 12 | 12 | 8 NOT NAMED | 12.1 | 28.9 | 35 | 0 |
| 1901 | 9 12 | 18 | 8 NOT NAMED | 12.7 | 29.1 | 35 | 0 |
| 1901 | 9 13 | 0  | 8 NOT NAMED | 13.3 | 29.4 | 40 | 0 |
| 1901 | 9 13 | 6  | 8 NOT NAMED | 13.8 | 29.5 | 40 | 0 |
| 1901 | 9 13 | 12 | 8 NOT NAMED | 14.3 | 29.6 | 45 | 0 |
| 1901 | 9 13 | 18 | 8 NOT NAMED | 14.8 | 29.6 | 45 | 0 |
| 1901 | 9 14 | 0  | 8 NOT NAMED | 15.3 | 29.6 | 50 | 0 |
| 1901 | 9 14 | 6  | 8 NOT NAMED | 15.8 | 29.4 | 50 | 0 |
| 1901 | 9 14 | 12 | 8 NOT NAMED | 16.2 | 29.2 | 50 | 0 |
| 1901 | 9 14 | 18 | 8 NOT NAMED | 16.6 | 29.1 | 50 | 0 |
| 1901 | 9 15 | 0  | 8 NOT NAMED | 17.0 | 29.0 | 45 | 0 |
| 1901 | 9 15 | 6  | 8 NOT NAMED | 17.4 | 29.0 | 40 | 0 |
| 1901 | 9 15 | 12 | 8 NOT NAMED | 17.8 | 29.2 | 35 | 0 |
| 1901 | 9 15 | 18 | 8 NOT NAMED | 18.1 | 29.4 | 35 | 0 |
| 1901 | 9 16 | 0  | 8 NOT NAMED | 18.4 | 29.8 | 35 | 0 |
| 1901 | 9 16 | 6  | 8 NOT NAMED | 18.6 | 30.2 | 35 | 0 |
| 1901 | 9 16 | 12 | 8 NOT NAMED | 18.9 | 30.7 | 35 | 0 |
| 1901 | 9 16 | 18 | 8 NOT NAMED | 19.1 | 30.9 | 35 | 0 |
| 1901 | 9 17 | 0  | 8 NOT NAMED | 19.4 | 31.1 | 35 | 0 |
| 1901 | 9 17 | 6  | 8 NOT NAMED | 19.8 | 31.4 | 35 | 0 |
| 1901 | 9 17 | 12 | 8 NOT NAMED | 20.2 | 31.6 | 35 | 0 |
| 1901 | 9 17 | 18 | 8 NOT NAMED | 20.8 | 32.0 | 30 | 0 |
| 1901 | 9 21 | 0  | 9 NOT NAMED | 13.7 | 73.0 | 35 | 0 |
| 1901 | 9 21 | 6  | 9 NOT NAMED | 13.8 | 74.0 | 35 | 0 |
| 1901 | 9 21 | 12 | 9 NOT NAMED | 14.0 | 75.0 | 35 | 0 |
| 1901 | 9 21 | 18 | 9 NOT NAMED | 14.2 | 75.9 | 35 | 0 |
| 1901 | 9 22 | 0  | 9 NOT NAMED | 14.4 | 76.9 | 35 | 0 |
| 1901 | 9 22 | 6  | 9 NOT NAMED | 14.7 | 78.0 | 35 | 0 |
| 1901 | 9 22 | 12 | 9 NOT NAMED | 15.0 | 79.0 | 35 | 0 |
| 1901 | 9 22 | 18 | 9 NOT NAMED | 15.2 | 79.8 | 35 | 0 |
| 1901 | 9 23 | 0  | 9 NOT NAMED | 15.5 | 80.6 | 35 | 0 |

|      |    |    |    |              |      |      |    |   |
|------|----|----|----|--------------|------|------|----|---|
| 1901 | 9  | 23 | 6  | 9 NOT NAMED  | 15.9 | 81.3 | 35 | 0 |
| 1901 | 9  | 23 | 12 | 9 NOT NAMED  | 16.5 | 82.0 | 35 | 0 |
| 1901 | 9  | 23 | 18 | 9 NOT NAMED  | 16.9 | 82.3 | 35 | 0 |
| 1901 | 9  | 24 | 0  | 9 NOT NAMED  | 17.4 | 82.5 | 35 | 0 |
| 1901 | 9  | 24 | 6  | 9 NOT NAMED  | 18.0 | 82.8 | 35 | 0 |
| 1901 | 9  | 24 | 12 | 9 NOT NAMED  | 18.5 | 83.0 | 35 | 0 |
| 1901 | 9  | 24 | 18 | 9 NOT NAMED  | 18.8 | 83.2 | 35 | 0 |
| 1901 | 9  | 25 | 0  | 9 NOT NAMED  | 19.2 | 83.3 | 35 | 0 |
| 1901 | 9  | 25 | 6  | 9 NOT NAMED  | 19.6 | 83.4 | 35 | 0 |
| 1901 | 9  | 25 | 12 | 9 NOT NAMED  | 20.0 | 83.5 | 40 | 0 |
| 1901 | 9  | 25 | 18 | 9 NOT NAMED  | 20.3 | 83.7 | 40 | 0 |
| 1901 | 9  | 26 | 0  | 9 NOT NAMED  | 20.7 | 83.8 | 40 | 0 |
| 1901 | 9  | 26 | 6  | 9 NOT NAMED  | 21.1 | 83.9 | 45 | 0 |
| 1901 | 9  | 26 | 12 | 9 NOT NAMED  | 21.5 | 84.0 | 45 | 0 |
| 1901 | 9  | 26 | 18 | 9 NOT NAMED  | 22.1 | 84.2 | 45 | 0 |
| 1901 | 9  | 27 | 0  | 9 NOT NAMED  | 23.2 | 84.5 | 40 | 0 |
| 1901 | 9  | 27 | 6  | 9 NOT NAMED  | 24.3 | 84.8 | 40 | 0 |
| 1901 | 9  | 27 | 12 | 9 NOT NAMED  | 25.5 | 85.0 | 40 | 0 |
| 1901 | 9  | 27 | 18 | 9 NOT NAMED  | 27.0 | 84.9 | 40 | 0 |
| 1901 | 9  | 28 | 0  | 9 NOT NAMED  | 28.8 | 84.7 | 40 | 0 |
| 1901 | 9  | 28 | 6  | 9 NOT NAMED  | 30.6 | 84.5 | 35 | 0 |
| 1901 | 9  | 28 | 12 | 9 NOT NAMED  | 32.5 | 84.0 | 35 | 0 |
| 1901 | 9  | 28 | 18 | 9 NOT NAMED  | 35.1 | 82.7 | 35 | 0 |
| 1901 | 9  | 29 | 0  | 9 NOT NAMED  | 37.8 | 81.4 | 30 | 0 |
| 1901 | 9  | 29 | 6  | 9 NOT NAMED  | 40.3 | 80.1 | 25 | 0 |
| 1901 | 9  | 29 | 12 | 9 NOT NAMED  | 42.5 | 78.6 | 25 | 0 |
| 1901 | 9  | 29 | 18 | 9 NOT NAMED  | 44.2 | 76.5 | 25 | 0 |
| 1901 | 9  | 30 | 0  | 9 NOT NAMED  | 45.7 | 74.5 | 25 | 0 |
| 1901 | 9  | 30 | 6  | 9 NOT NAMED  | 47.0 | 72.5 | 25 | 0 |
| 1901 | 9  | 30 | 12 | 9 NOT NAMED  | 48.0 | 68.5 | 25 | 0 |
| 1901 | 9  | 30 | 18 | 9 NOT NAMED  | 48.2 | 63.9 | 30 | 0 |
| 1901 | 10 | 1  | 0  | 9 NOT NAMED  | 48.2 | 60.1 | 30 | 0 |
| 1901 | 10 | 1  | 6  | 9 NOT NAMED  | 48.3 | 55.9 | 35 | 0 |
| 1901 | 10 | 1  | 12 | 9 NOT NAMED  | 48.5 | 51.5 | 35 | 0 |
| 1901 | 10 | 1  | 18 | 9 NOT NAMED  | 49.0 | 46.1 | 40 | 0 |
| 1901 | 10 | 2  | 0  | 9 NOT NAMED  | 50.8 | 39.4 | 40 | 0 |
| 1901 | 10 | 2  | 6  | 9 NOT NAMED  | 53.1 | 32.6 | 45 | 0 |
| 1901 | 10 | 2  | 12 | 9 NOT NAMED  | 55.3 | 27.0 | 45 | 0 |
| 1901 | 10 | 5  | 0  | 10 NOT NAMED | 12.0 | 51.5 | 35 | 0 |
| 1901 | 10 | 5  | 6  | 10 NOT NAMED | 12.2 | 51.7 | 35 | 0 |
| 1901 | 10 | 5  | 12 | 10 NOT NAMED | 12.5 | 52.0 | 35 | 0 |
| 1901 | 10 | 5  | 18 | 10 NOT NAMED | 12.7 | 52.3 | 35 | 0 |
| 1901 | 10 | 6  | 0  | 10 NOT NAMED | 13.0 | 52.6 | 40 | 0 |
| 1901 | 10 | 6  | 6  | 10 NOT NAMED | 13.2 | 52.9 | 40 | 0 |

|            |         |           |      |      |    |   |
|------------|---------|-----------|------|------|----|---|
| 1901 10    | 6 12 10 | NOT NAMED | 13.5 | 53.3 | 40 | 0 |
| 1901 10    | 6 18 10 | NOT NAMED | 13.8 | 53.7 | 45 | 0 |
| 1901 10    | 7 0 10  | NOT NAMED | 14.2 | 54.1 | 50 | 0 |
| 1901 10    | 7 6 10  | NOT NAMED | 14.6 | 54.5 | 55 | 0 |
| 1901 10    | 7 12 10 | NOT NAMED | 15.0 | 55.0 | 60 | 0 |
| 1901 10    | 7 18 10 | NOT NAMED | 15.5 | 55.6 | 60 | 0 |
| 1901 10    | 8 0 10  | NOT NAMED | 16.2 | 56.7 | 60 | 0 |
| 1901 10    | 8 6 10  | NOT NAMED | 16.9 | 57.6 | 60 | 0 |
| 1901 10    | 8 12 10 | NOT NAMED | 17.5 | 58.5 | 55 | 0 |
| 1901 10    | 8 18 10 | NOT NAMED | 18.4 | 59.6 | 50 | 0 |
| 1901 10    | 9 0 10  | NOT NAMED | 19.4 | 60.6 | 45 | 0 |
| 1901 10    | 9 6 10  | NOT NAMED | 20.2 | 61.4 | 40 | 0 |
| 1901 10    | 9 12 10 | NOT NAMED | 21.0 | 62.3 | 35 | 0 |
| 1901 10    | 9 18 10 | NOT NAMED | 21.8 | 63.7 | 35 | 0 |
| 1901 10 10 | 0 10    | NOT NAMED | 22.7 | 65.5 | 35 | 0 |
| 1901 10 10 | 6 10    | NOT NAMED | 24.0 | 67.0 | 35 | 0 |
| 1901 10 10 | 12 10   | NOT NAMED | 25.6 | 68.5 | 35 | 0 |
| 1901 10 10 | 18 10   | NOT NAMED | 27.7 | 69.0 | 35 | 0 |
| 1901 10 11 | 0 10    | NOT NAMED | 30.3 | 68.5 | 40 | 0 |
| 1901 10 11 | 6 10    | NOT NAMED | 33.0 | 67.2 | 40 | 0 |
| 1901 10 11 | 12 10   | NOT NAMED | 35.0 | 65.0 | 45 | 0 |
| 1901 10 11 | 18 10   | NOT NAMED | 35.8 | 63.8 | 45 | 0 |
| 1901 10 12 | 0 10    | NOT NAMED | 36.5 | 62.5 | 45 | 0 |
| 1901 10 12 | 6 10    | NOT NAMED | 37.3 | 61.3 | 40 | 0 |
| 1901 10 12 | 12 10   | NOT NAMED | 38.1 | 60.0 | 35 | 0 |
| 1901 10 12 | 18 10   | NOT NAMED | 39.2 | 58.7 | 35 | 0 |
| 1901 10 13 | 0 10    | NOT NAMED | 40.2 | 57.0 | 35 | 0 |
| 1901 10 13 | 6 10    | NOT NAMED | 41.1 | 55.6 | 35 | 0 |
| 1901 10 13 | 12 10   | NOT NAMED | 42.0 | 54.1 | 35 | 0 |
| 1901 10 13 | 18 10   | NOT NAMED | 43.0 | 51.6 | 35 | 0 |
| 1901 10 14 | 0 10    | NOT NAMED | 43.9 | 48.4 | 35 | 0 |
| 1901 10 14 | 6 10    | NOT NAMED | 44.9 | 44.4 | 35 | 0 |
| 1901 10 14 | 12 10   | NOT NAMED | 45.8 | 40.0 | 35 | 0 |
| 1901 10 15 | 0 11    | NOT NAMED | 21.0 | 80.0 | 30 | 0 |
| 1901 10 15 | 6 11    | NOT NAMED | 21.5 | 79.3 | 30 | 0 |
| 1901 10 15 | 12 11   | NOT NAMED | 22.0 | 78.5 | 30 | 0 |
| 1901 10 15 | 18 11   | NOT NAMED | 22.5 | 77.7 | 35 | 0 |
| 1901 10 16 | 0 11    | NOT NAMED | 22.9 | 76.7 | 40 | 0 |
| 1901 10 16 | 6 11    | NOT NAMED | 23.3 | 75.8 | 45 | 0 |
| 1901 10 16 | 12 11   | NOT NAMED | 23.7 | 75.0 | 50 | 0 |
| 1901 10 16 | 18 11   | NOT NAMED | 24.3 | 73.7 | 50 | 0 |
| 1901 10 17 | 0 11    | NOT NAMED | 25.2 | 72.4 | 50 | 0 |
| 1901 10 17 | 6 11    | NOT NAMED | 25.8 | 71.1 | 50 | 0 |
| 1901 10 17 | 12 11   | NOT NAMED | 26.5 | 69.5 | 45 | 0 |



|                            |      |      |    |   |
|----------------------------|------|------|----|---|
| 1901 10 17 18 11 NOT NAMED | 26.9 | 68.4 | 40 | 0 |
| 1901 10 18 0 11 NOT NAMED  | 27.3 | 67.2 | 40 | 0 |
| 1901 10 18 6 11 NOT NAMED  | 27.6 | 66.1 | 40 | 0 |
| 1901 10 18 12 11 NOT NAMED | 28.0 | 65.0 | 40 | 0 |
| 1901 10 18 18 11 NOT NAMED | 28.4 | 63.7 | 40 | 0 |
| 1901 10 30 12 12 NOT NAMED | 19.3 | 67.3 | 30 | 0 |
| 1901 10 30 18 12 NOT NAMED | 20.5 | 67.2 | 30 | 0 |
| 1901 10 31 0 12 NOT NAMED  | 21.7 | 67.1 | 35 | 0 |
| 1901 10 31 6 12 NOT NAMED  | 22.9 | 66.9 | 35 | 0 |
| 1901 10 31 12 12 NOT NAMED | 24.0 | 66.7 | 35 | 0 |
| 1901 10 31 18 12 NOT NAMED | 24.7 | 66.4 | 35 | 0 |
| 1901 11 1 0 12 NOT NAMED   | 25.4 | 66.1 | 40 | 0 |
| 1901 11 1 6 12 NOT NAMED   | 26.1 | 65.7 | 45 | 0 |
| 1901 11 1 12 12 NOT NAMED  | 26.7 | 65.3 | 50 | 0 |
| 1901 11 1 18 12 NOT NAMED  | 27.4 | 64.9 | 55 | 0 |
| 1901 11 2 0 12 NOT NAMED   | 28.0 | 64.6 | 55 | 0 |
| 1901 11 2 6 12 NOT NAMED   | 28.6 | 64.2 | 60 | 0 |
| 1901 11 2 12 12 NOT NAMED  | 29.3 | 63.5 | 60 | 0 |
| 1901 11 2 18 12 NOT NAMED  | 29.6 | 62.8 | 65 | 0 |
| 1901 11 3 0 12 NOT NAMED   | 30.0 | 62.0 | 70 | 0 |
| 1901 11 3 6 12 NOT NAMED   | 30.5 | 61.1 | 70 | 0 |
| 1901 11 3 12 12 NOT NAMED  | 31.2 | 60.3 | 70 | 0 |
| 1901 11 3 18 12 NOT NAMED  | 32.4 | 59.1 | 70 | 0 |
| 1901 11 4 0 12 NOT NAMED   | 34.0 | 58.1 | 65 | 0 |
| 1901 11 4 6 12 NOT NAMED   | 35.6 | 57.1 | 60 | 0 |
| 1901 11 4 12 12 NOT NAMED  | 36.8 | 56.3 | 55 | 0 |
| 1901 11 4 18 12 NOT NAMED  | 37.4 | 55.7 | 50 | 0 |
| 1901 11 5 0 12 NOT NAMED   | 37.9 | 55.5 | 50 | 0 |
| 1901 11 5 6 12 NOT NAMED   | 38.3 | 55.0 | 50 | 0 |
| 1901 11 5 12 12 NOT NAMED  | 38.5 | 54.5 | 45 | 0 |
| 1901 11 5 18 12 NOT NAMED  | 38.3 | 53.4 | 45 | 0 |
| 1901 11 6 0 12 NOT NAMED   | 37.8 | 52.5 | 40 | 0 |
| 1901 11 6 6 12 NOT NAMED   | 37.3 | 51.5 | 40 | 0 |
| 1901 11 6 12 12 NOT NAMED  | 37.0 | 50.5 | 35 | 0 |
| 1901 11 6 18 12 NOT NAMED  | 37.0 | 49.2 | 30 | 0 |
| 1902 6 12 12 1 NOT NAMED   | 17.7 | 84.0 | 30 | 0 |
| 1902 6 12 18 1 NOT NAMED   | 19.1 | 83.6 | 30 | 0 |
| 1902 6 13 0 1 NOT NAMED    | 20.7 | 83.3 | 35 | 0 |
| 1902 6 13 6 1 NOT NAMED    | 22.2 | 83.1 | 40 | 0 |
| 1902 6 13 12 1 NOT NAMED   | 23.8 | 83.0 | 45 | 0 |
| 1902 6 13 18 1 NOT NAMED   | 24.9 | 83.2 | 50 | 0 |
| 1902 6 14 0 1 NOT NAMED    | 25.9 | 83.5 | 50 | 0 |
| 1902 6 14 6 1 NOT NAMED    | 26.9 | 83.8 | 50 | 0 |
| 1902 6 14 12 1 NOT NAMED   | 28.0 | 84.0 | 50 | 0 |

|      |         |             |      |      |    |   |
|------|---------|-------------|------|------|----|---|
| 1902 | 6 14 18 | 1 NOT NAMED | 29.0 | 83.9 | 50 | 0 |
| 1902 | 6 15 0  | 1 NOT NAMED | 30.0 | 83.6 | 45 | 0 |
| 1902 | 6 15 6  | 1 NOT NAMED | 31.0 | 83.2 | 40 | 0 |
| 1902 | 6 15 12 | 1 NOT NAMED | 32.0 | 82.5 | 35 | 0 |
| 1902 | 6 15 18 | 1 NOT NAMED | 33.0 | 81.7 | 35 | 0 |
| 1902 | 6 16 0  | 1 NOT NAMED | 34.0 | 80.7 | 35 | 0 |
| 1902 | 6 16 6  | 1 NOT NAMED | 35.2 | 79.5 | 35 | 0 |
| 1902 | 6 16 12 | 1 NOT NAMED | 36.7 | 78.0 | 40 | 0 |
| 1902 | 6 16 18 | 1 NOT NAMED | 38.6 | 74.9 | 40 | 0 |
| 1902 | 6 17 0  | 1 NOT NAMED | 41.9 | 71.5 | 35 | 0 |
| 1902 | 6 17 6  | 1 NOT NAMED | 45.0 | 68.2 | 35 | 0 |
| 1902 | 6 17 12 | 1 NOT NAMED | 47.5 | 66.0 | 30 | 0 |
| 1902 | 6 17 18 | 1 NOT NAMED | 49.4 | 64.0 | 30 | 0 |
| 1902 | 6 21 0  | 2 NOT NAMED | 17.2 | 92.1 | 25 | 0 |
| 1902 | 6 21 6  | 2 NOT NAMED | 17.6 | 92.4 | 25 | 0 |
| 1902 | 6 21 12 | 2 NOT NAMED | 18.0 | 92.7 | 25 | 0 |
| 1902 | 6 21 18 | 2 NOT NAMED | 18.2 | 92.9 | 25 | 0 |
| 1902 | 6 22 0  | 2 NOT NAMED | 18.4 | 93.0 | 30 | 0 |
| 1902 | 6 22 6  | 2 NOT NAMED | 18.7 | 93.2 | 30 | 0 |
| 1902 | 6 22 12 | 2 NOT NAMED | 19.0 | 93.5 | 30 | 0 |
| 1902 | 6 22 18 | 2 NOT NAMED | 19.2 | 93.7 | 30 | 0 |
| 1902 | 6 23 0  | 2 NOT NAMED | 19.5 | 93.9 | 30 | 0 |
| 1902 | 6 23 6  | 2 NOT NAMED | 19.7 | 94.1 | 30 | 0 |
| 1902 | 6 23 12 | 2 NOT NAMED | 20.0 | 94.3 | 30 | 0 |
| 1902 | 6 23 18 | 2 NOT NAMED | 20.3 | 94.5 | 30 | 0 |
| 1902 | 6 24 0  | 2 NOT NAMED | 20.5 | 94.6 | 30 | 0 |
| 1902 | 6 24 6  | 2 NOT NAMED | 20.7 | 94.8 | 30 | 0 |
| 1902 | 6 24 12 | 2 NOT NAMED | 21.0 | 95.0 | 35 | 0 |
| 1902 | 6 24 18 | 2 NOT NAMED | 21.5 | 95.3 | 40 | 0 |
| 1902 | 6 25 0  | 2 NOT NAMED | 22.1 | 95.6 | 45 | 0 |
| 1902 | 6 25 6  | 2 NOT NAMED | 22.7 | 96.0 | 50 | 0 |
| 1902 | 6 25 12 | 2 NOT NAMED | 23.3 | 96.3 | 55 | 0 |
| 1902 | 6 25 18 | 2 NOT NAMED | 23.9 | 96.6 | 60 | 0 |
| 1902 | 6 26 0  | 2 NOT NAMED | 24.7 | 96.8 | 65 | 0 |
| 1902 | 6 26 6  | 2 NOT NAMED | 25.5 | 96.9 | 70 | 0 |
| 1902 | 6 26 12 | 2 NOT NAMED | 26.4 | 97.0 | 65 | 0 |
| 1902 | 6 26 18 | 2 NOT NAMED | 27.2 | 97.1 | 60 | 0 |
| 1902 | 6 27 0  | 2 NOT NAMED | 28.1 | 97.2 | 50 | 0 |
| 1902 | 6 27 6  | 2 NOT NAMED | 29.0 | 97.3 | 45 | 0 |
| 1902 | 6 27 12 | 2 NOT NAMED | 30.0 | 97.4 | 40 | 0 |
| 1902 | 6 27 18 | 2 NOT NAMED | 31.5 | 97.2 | 35 | 0 |
| 1902 | 6 28 0  | 2 NOT NAMED | 32.8 | 96.6 | 35 | 0 |
| 1902 | 6 28 6  | 2 NOT NAMED | 34.2 | 95.9 | 35 | 0 |
| 1902 | 6 28 12 | 2 NOT NAMED | 35.8 | 94.5 | 35 | 0 |

|      |         |             |      |      |    |   |
|------|---------|-------------|------|------|----|---|
| 1902 | 6 28 18 | 2 NOT NAMED | 37.6 | 92.3 | 35 | 0 |
| 1902 | 6 29 0  | 2 NOT NAMED | 39.5 | 88.6 | 35 | 0 |
| 1902 | 6 29 6  | 2 NOT NAMED | 40.6 | 85.4 | 35 | 0 |
| 1902 | 6 29 12 | 2 NOT NAMED | 41.5 | 82.0 | 35 | 0 |
| 1902 | 6 29 18 | 2 NOT NAMED | 41.8 | 78.6 | 35 | 0 |
| 1902 | 9 16 6  | 3 NOT NAMED | 7.7  | 30.8 | 35 | 0 |
| 1902 | 9 16 12 | 3 NOT NAMED | 8.0  | 32.0 | 35 | 0 |
| 1902 | 9 16 18 | 3 NOT NAMED | 8.5  | 33.2 | 35 | 0 |
| 1902 | 9 17 0  | 3 NOT NAMED | 9.2  | 34.5 | 35 | 0 |
| 1902 | 9 17 6  | 3 NOT NAMED | 9.8  | 36.0 | 35 | 0 |
| 1902 | 9 17 12 | 3 NOT NAMED | 10.4 | 37.5 | 35 | 0 |
| 1902 | 9 17 18 | 3 NOT NAMED | 10.9 | 38.9 | 35 | 0 |
| 1902 | 9 18 0  | 3 NOT NAMED | 11.4 | 40.3 | 40 | 0 |
| 1902 | 9 18 6  | 3 NOT NAMED | 11.9 | 41.7 | 40 | 0 |
| 1902 | 9 18 12 | 3 NOT NAMED | 12.3 | 43.0 | 40 | 0 |
| 1902 | 9 18 18 | 3 NOT NAMED | 12.6 | 44.4 | 45 | 0 |
| 1902 | 9 19 0  | 3 NOT NAMED | 13.1 | 46.1 | 50 | 0 |
| 1902 | 9 19 6  | 3 NOT NAMED | 13.6 | 47.7 | 50 | 0 |
| 1902 | 9 19 12 | 3 NOT NAMED | 14.3 | 49.3 | 55 | 0 |
| 1902 | 9 19 18 | 3 NOT NAMED | 15.3 | 50.9 | 60 | 0 |
| 1902 | 9 20 0  | 3 NOT NAMED | 16.8 | 52.3 | 65 | 0 |
| 1902 | 9 20 6  | 3 NOT NAMED | 18.9 | 53.0 | 70 | 0 |
| 1902 | 9 20 12 | 3 NOT NAMED | 21.0 | 53.0 | 75 | 0 |
| 1902 | 9 20 18 | 3 NOT NAMED | 22.9 | 52.6 | 80 | 0 |
| 1902 | 9 21 0  | 3 NOT NAMED | 24.7 | 51.7 | 85 | 0 |
| 1902 | 9 21 6  | 3 NOT NAMED | 26.5 | 50.5 | 85 | 0 |
| 1902 | 9 21 12 | 3 NOT NAMED | 28.3 | 49.5 | 85 | 0 |
| 1902 | 9 21 18 | 3 NOT NAMED | 30.2 | 48.4 | 85 | 0 |
| 1902 | 9 22 0  | 3 NOT NAMED | 32.1 | 47.3 | 80 | 0 |
| 1902 | 9 22 6  | 3 NOT NAMED | 33.6 | 46.0 | 75 | 0 |
| 1902 | 9 22 12 | 3 NOT NAMED | 34.8 | 44.8 | 75 | 0 |
| 1902 | 9 22 18 | 3 NOT NAMED | 35.8 | 42.9 | 70 | 0 |
| 1902 | 9 23 0  | 3 NOT NAMED | 36.8 | 41.4 | 65 | 0 |
| 1902 | 9 23 6  | 3 NOT NAMED | 37.8 | 39.9 | 65 | 0 |
| 1902 | 9 23 12 | 3 NOT NAMED | 38.7 | 38.5 | 60 | 0 |
| 1902 | 9 23 18 | 3 NOT NAMED | 39.5 | 37.1 | 55 | 0 |
| 1902 | 9 24 0  | 3 NOT NAMED | 40.4 | 35.8 | 55 | 0 |
| 1902 | 9 24 6  | 3 NOT NAMED | 41.3 | 34.5 | 50 | 0 |
| 1902 | 9 24 12 | 3 NOT NAMED | 42.3 | 33.1 | 50 | 0 |
| 1902 | 9 24 18 | 3 NOT NAMED | 44.0 | 31.7 | 45 | 0 |
| 1902 | 9 25 0  | 3 NOT NAMED | 45.7 | 30.4 | 45 | 0 |
| 1902 | 9 25 6  | 3 NOT NAMED | 47.6 | 29.6 | 45 | 0 |
| 1902 | 9 25 12 | 3 NOT NAMED | 49.8 | 28.8 | 40 | 0 |
| 1902 | 9 25 18 | 3 NOT NAMED | 51.6 | 29.2 | 40 | 0 |

|         |    |    |             |      |      |    |     |
|---------|----|----|-------------|------|------|----|-----|
| 1902 10 | 3  | 0  | 4 NOT NAMED | 14.0 | 93.8 | 30 | 0   |
| 1902 10 | 3  | 6  | 4 NOT NAMED | 14.5 | 94.0 | 30 | 0   |
| 1902 10 | 3  | 12 | 4 NOT NAMED | 15.0 | 94.2 | 30 | 0   |
| 1902 10 | 3  | 18 | 4 NOT NAMED | 15.5 | 94.3 | 30 | 0   |
| 1902 10 | 4  | 0  | 4 NOT NAMED | 16.0 | 94.4 | 30 | 0   |
| 1902 10 | 4  | 6  | 4 NOT NAMED | 16.5 | 94.5 | 30 | 0   |
| 1902 10 | 4  | 12 | 4 NOT NAMED | 17.0 | 94.6 | 30 | 0   |
| 1902 10 | 4  | 18 | 4 NOT NAMED | 17.5 | 94.7 | 30 | 0   |
| 1902 10 | 5  | 0  | 4 NOT NAMED | 18.0 | 94.8 | 30 | 0   |
| 1902 10 | 5  | 6  | 4 NOT NAMED | 18.5 | 94.9 | 30 | 0   |
| 1902 10 | 5  | 12 | 4 NOT NAMED | 18.7 | 94.9 | 35 | 0   |
| 1902 10 | 5  | 18 | 4 NOT NAMED | 18.8 | 94.7 | 45 | 0   |
| 1902 10 | 6  | 0  | 4 NOT NAMED | 18.9 | 94.4 | 55 | 0   |
| 1902 10 | 6  | 6  | 4 NOT NAMED | 19.1 | 94.0 | 60 | 0   |
| 1902 10 | 6  | 12 | 4 NOT NAMED | 19.3 | 93.7 | 65 | 0   |
| 1902 10 | 6  | 18 | 4 NOT NAMED | 19.5 | 93.3 | 75 | 0   |
| 1902 10 | 7  | 0  | 4 NOT NAMED | 19.7 | 92.9 | 85 | 0   |
| 1902 10 | 7  | 6  | 4 NOT NAMED | 20.0 | 92.5 | 90 | 970 |
| 1902 10 | 7  | 12 | 4 NOT NAMED | 20.3 | 92.0 | 90 | 0   |
| 1902 10 | 7  | 18 | 4 NOT NAMED | 20.7 | 91.5 | 90 | 0   |
| 1902 10 | 8  | 0  | 4 NOT NAMED | 21.1 | 91.1 | 90 | 0   |
| 1902 10 | 8  | 6  | 4 NOT NAMED | 21.5 | 90.8 | 90 | 0   |
| 1902 10 | 8  | 12 | 4 NOT NAMED | 22.0 | 90.5 | 90 | 0   |
| 1902 10 | 8  | 18 | 4 NOT NAMED | 22.7 | 90.2 | 90 | 0   |
| 1902 10 | 9  | 0  | 4 NOT NAMED | 23.4 | 90.0 | 90 | 0   |
| 1902 10 | 9  | 6  | 4 NOT NAMED | 23.9 | 89.9 | 85 | 0   |
| 1902 10 | 9  | 12 | 4 NOT NAMED | 24.5 | 89.7 | 80 | 0   |
| 1902 10 | 9  | 18 | 4 NOT NAMED | 25.3 | 89.5 | 70 | 0   |
| 1902 10 | 10 | 0  | 4 NOT NAMED | 26.2 | 89.1 | 65 | 0   |
| 1902 10 | 10 | 6  | 4 NOT NAMED | 27.1 | 88.8 | 60 | 0   |
| 1902 10 | 10 | 12 | 4 NOT NAMED | 28.0 | 88.5 | 55 | 0   |
| 1902 10 | 10 | 18 | 4 NOT NAMED | 29.4 | 87.8 | 50 | 0   |
| 1902 10 | 11 | 0  | 4 NOT NAMED | 31.0 | 86.9 | 40 | 0   |
| 1902 10 | 11 | 6  | 4 NOT NAMED | 32.5 | 85.9 | 35 | 0   |
| 1902 10 | 11 | 12 | 4 NOT NAMED | 33.7 | 84.8 | 35 | 0   |
| 1902 10 | 11 | 18 | 4 NOT NAMED | 34.9 | 82.8 | 35 | 0   |
| 1902 10 | 12 | 0  | 4 NOT NAMED | 36.4 | 80.5 | 35 | 0   |
| 1902 10 | 12 | 6  | 4 NOT NAMED | 37.6 | 78.0 | 35 | 0   |
| 1902 10 | 12 | 12 | 4 NOT NAMED | 38.8 | 72.8 | 35 | 0   |
| 1902 10 | 12 | 18 | 4 NOT NAMED | 39.9 | 69.1 | 35 | 0   |
| 1902 10 | 13 | 0  | 4 NOT NAMED | 40.9 | 65.5 | 35 | 0   |
| 1902 10 | 13 | 6  | 4 NOT NAMED | 41.9 | 61.0 | 40 | 0   |
| 1902 10 | 13 | 12 | 4 NOT NAMED | 42.8 | 55.1 | 40 | 0   |
| 1902 11 | 1  | 0  | 5 NOT NAMED | 20.0 | 67.3 | 30 | 0   |

|      |    |    |    |             |      |      |    |   |
|------|----|----|----|-------------|------|------|----|---|
| 1902 | 11 | 1  | 6  | 5 NOT NAMED | 21.0 | 68.3 | 30 | 0 |
| 1902 | 11 | 1  | 12 | 5 NOT NAMED | 22.5 | 67.3 | 35 | 0 |
| 1902 | 11 | 1  | 18 | 5 NOT NAMED | 24.6 | 66.3 | 35 | 0 |
| 1902 | 11 | 2  | 0  | 5 NOT NAMED | 26.6 | 65.3 | 35 | 0 |
| 1902 | 11 | 2  | 6  | 5 NOT NAMED | 28.7 | 63.9 | 40 | 0 |
| 1902 | 11 | 2  | 12 | 5 NOT NAMED | 30.5 | 62.6 | 45 | 0 |
| 1902 | 11 | 2  | 18 | 5 NOT NAMED | 31.8 | 61.3 | 50 | 0 |
| 1902 | 11 | 3  | 0  | 5 NOT NAMED | 32.7 | 60.3 | 55 | 0 |
| 1902 | 11 | 3  | 6  | 5 NOT NAMED | 33.5 | 59.2 | 60 | 0 |
| 1902 | 11 | 3  | 12 | 5 NOT NAMED | 34.3 | 58.0 | 60 | 0 |
| 1902 | 11 | 3  | 18 | 5 NOT NAMED | 34.8 | 57.2 | 60 | 0 |
| 1902 | 11 | 4  | 0  | 5 NOT NAMED | 35.2 | 56.5 | 60 | 0 |
| 1902 | 11 | 4  | 6  | 5 NOT NAMED | 35.7 | 55.7 | 55 | 0 |
| 1902 | 11 | 4  | 12 | 5 NOT NAMED | 36.0 | 55.0 | 50 | 0 |
| 1902 | 11 | 4  | 18 | 5 NOT NAMED | 36.3 | 53.8 | 50 | 0 |
| 1902 | 11 | 5  | 0  | 5 NOT NAMED | 36.6 | 52.8 | 50 | 0 |
| 1902 | 11 | 5  | 6  | 5 NOT NAMED | 36.8 | 51.9 | 50 | 0 |
| 1902 | 11 | 5  | 12 | 5 NOT NAMED | 37.0 | 51.0 | 50 | 0 |
| 1902 | 11 | 5  | 18 | 5 NOT NAMED | 37.1 | 49.8 | 40 | 0 |
| 1902 | 11 | 6  | 0  | 5 NOT NAMED | 37.1 | 48.6 | 35 | 0 |
| 1902 | 11 | 6  | 6  | 5 NOT NAMED | 37.0 | 47.4 | 30 | 0 |
| 1902 | 11 | 6  | 12 | 5 NOT NAMED | 37.0 | 46.5 | 25 | 0 |
| 1902 | 11 | 6  | 18 | 5 NOT NAMED | 37.1 | 45.4 | 20 | 0 |
| 1903 | 7  | 21 | 0  | 1 NOT NAMED | 20.0 | 67.8 | 35 | 0 |
| 1903 | 7  | 21 | 6  | 1 NOT NAMED | 20.7 | 68.9 | 35 | 0 |
| 1903 | 7  | 21 | 12 | 1 NOT NAMED | 21.5 | 70.0 | 35 | 0 |
| 1903 | 7  | 21 | 18 | 1 NOT NAMED | 22.5 | 71.2 | 35 | 0 |
| 1903 | 7  | 22 | 0  | 1 NOT NAMED | 23.7 | 72.6 | 35 | 0 |
| 1903 | 7  | 22 | 6  | 1 NOT NAMED | 24.9 | 73.8 | 35 | 0 |
| 1903 | 7  | 22 | 12 | 1 NOT NAMED | 26.5 | 75.0 | 40 | 0 |
| 1903 | 7  | 22 | 18 | 1 NOT NAMED | 27.6 | 75.5 | 40 | 0 |
| 1903 | 7  | 23 | 0  | 1 NOT NAMED | 28.8 | 75.6 | 45 | 0 |
| 1903 | 7  | 23 | 6  | 1 NOT NAMED | 29.9 | 75.4 | 50 | 0 |
| 1903 | 7  | 23 | 12 | 1 NOT NAMED | 31.0 | 75.0 | 55 | 0 |
| 1903 | 7  | 23 | 18 | 1 NOT NAMED | 32.2 | 73.6 | 60 | 0 |
| 1903 | 7  | 24 | 0  | 1 NOT NAMED | 33.4 | 71.6 | 65 | 0 |
| 1903 | 7  | 24 | 6  | 1 NOT NAMED | 34.3 | 70.1 | 70 | 0 |
| 1903 | 7  | 24 | 12 | 1 NOT NAMED | 35.3 | 68.5 | 70 | 0 |
| 1903 | 7  | 24 | 18 | 1 NOT NAMED | 36.4 | 66.9 | 70 | 0 |
| 1903 | 7  | 25 | 0  | 1 NOT NAMED | 37.3 | 65.2 | 70 | 0 |
| 1903 | 7  | 25 | 6  | 1 NOT NAMED | 37.9 | 63.6 | 65 | 0 |
| 1903 | 7  | 25 | 12 | 1 NOT NAMED | 38.5 | 61.5 | 60 | 0 |
| 1903 | 7  | 25 | 18 | 1 NOT NAMED | 39.3 | 58.0 | 55 | 0 |
| 1903 | 7  | 26 | 0  | 1 NOT NAMED | 39.9 | 54.7 | 50 | 0 |

|      |   |    |    |   |           |      |      |     |     |
|------|---|----|----|---|-----------|------|------|-----|-----|
| 1903 | 7 | 26 | 6  | 1 | NOT NAMED | 40.5 | 51.4 | 50  | 0   |
| 1903 | 7 | 26 | 12 | 1 | NOT NAMED | 41.0 | 48.5 | 45  | 0   |
| 1903 | 7 | 26 | 18 | 1 | NOT NAMED | 41.4 | 45.7 | 40  | 0   |
| 1903 | 8 | 6  | 6  | 2 | NOT NAMED | 11.8 | 42.3 | 50  | 0   |
| 1903 | 8 | 6  | 12 | 2 | NOT NAMED | 12.0 | 43.5 | 50  | 0   |
| 1903 | 8 | 6  | 18 | 2 | NOT NAMED | 12.3 | 44.7 | 50  | 0   |
| 1903 | 8 | 7  | 0  | 2 | NOT NAMED | 12.6 | 46.0 | 55  | 0   |
| 1903 | 8 | 7  | 6  | 2 | NOT NAMED | 13.1 | 47.5 | 65  | 0   |
| 1903 | 8 | 7  | 12 | 2 | NOT NAMED | 13.5 | 49.0 | 70  | 0   |
| 1903 | 8 | 7  | 18 | 2 | NOT NAMED | 13.7 | 50.9 | 70  | 0   |
| 1903 | 8 | 8  | 0  | 2 | NOT NAMED | 13.8 | 52.6 | 70  | 0   |
| 1903 | 8 | 8  | 6  | 2 | NOT NAMED | 13.8 | 54.1 | 70  | 0   |
| 1903 | 8 | 8  | 12 | 2 | NOT NAMED | 14.0 | 56.0 | 70  | 0   |
| 1903 | 8 | 8  | 18 | 2 | NOT NAMED | 14.3 | 57.8 | 75  | 0   |
| 1903 | 8 | 9  | 0  | 2 | NOT NAMED | 14.4 | 59.8 | 80  | 0   |
| 1903 | 8 | 9  | 6  | 2 | NOT NAMED | 14.5 | 61.4 | 90  | 970 |
| 1903 | 8 | 9  | 12 | 2 | NOT NAMED | 14.7 | 63.0 | 100 | 0   |
| 1903 | 8 | 9  | 18 | 2 | NOT NAMED | 14.9 | 64.7 | 105 | 0   |
| 1903 | 8 | 10 | 0  | 2 | NOT NAMED | 15.2 | 66.4 | 105 | 0   |
| 1903 | 8 | 10 | 6  | 2 | NOT NAMED | 15.6 | 68.2 | 105 | 0   |
| 1903 | 8 | 10 | 12 | 2 | NOT NAMED | 16.0 | 70.0 | 105 | 0   |
| 1903 | 8 | 10 | 18 | 2 | NOT NAMED | 16.6 | 72.0 | 105 | 0   |
| 1903 | 8 | 11 | 0  | 2 | NOT NAMED | 17.2 | 73.8 | 105 | 0   |
| 1903 | 8 | 11 | 6  | 2 | NOT NAMED | 17.7 | 75.6 | 105 | 0   |
| 1903 | 8 | 11 | 12 | 2 | NOT NAMED | 18.3 | 77.3 | 105 | 0   |
| 1903 | 8 | 11 | 18 | 2 | NOT NAMED | 18.6 | 78.7 | 105 | 0   |
| 1903 | 8 | 12 | 0  | 2 | NOT NAMED | 19.0 | 80.0 | 105 | 0   |
| 1903 | 8 | 12 | 6  | 2 | NOT NAMED | 19.4 | 81.1 | 105 | 958 |
| 1903 | 8 | 12 | 12 | 2 | NOT NAMED | 19.7 | 82.5 | 105 | 0   |
| 1903 | 8 | 12 | 18 | 2 | NOT NAMED | 20.1 | 84.0 | 105 | 0   |
| 1903 | 8 | 13 | 0  | 2 | NOT NAMED | 20.4 | 85.6 | 105 | 0   |
| 1903 | 8 | 13 | 6  | 2 | NOT NAMED | 20.8 | 87.3 | 85  | 0   |
| 1903 | 8 | 13 | 12 | 2 | NOT NAMED | 21.0 | 88.4 | 70  | 0   |
| 1903 | 8 | 13 | 18 | 2 | NOT NAMED | 21.2 | 89.4 | 65  | 0   |
| 1903 | 8 | 14 | 0  | 2 | NOT NAMED | 21.4 | 90.4 | 70  | 0   |
| 1903 | 8 | 14 | 6  | 2 | NOT NAMED | 21.7 | 91.4 | 70  | 0   |
| 1903 | 8 | 14 | 12 | 2 | NOT NAMED | 22.0 | 92.5 | 70  | 0   |
| 1903 | 8 | 14 | 18 | 2 | NOT NAMED | 22.1 | 93.4 | 70  | 0   |
| 1903 | 8 | 15 | 0  | 2 | NOT NAMED | 22.3 | 94.3 | 70  | 0   |
| 1903 | 8 | 15 | 6  | 2 | NOT NAMED | 22.6 | 95.1 | 70  | 986 |
| 1903 | 8 | 15 | 12 | 2 | NOT NAMED | 23.0 | 96.0 | 70  | 0   |
| 1903 | 8 | 15 | 18 | 2 | NOT NAMED | 23.1 | 96.8 | 70  | 0   |
| 1903 | 8 | 16 | 0  | 2 | NOT NAMED | 23.0 | 97.6 | 70  | 0   |
| 1903 | 8 | 16 | 6  | 2 | NOT NAMED | 22.8 | 98.3 | 50  | 0   |

|      |   |    |    |   |           |      |      |    |     |
|------|---|----|----|---|-----------|------|------|----|-----|
| 1903 | 8 | 16 | 12 | 2 | NOT NAMED | 22.5 | 99.0 | 40 | 0   |
| 1903 | 8 | 16 | 18 | 2 | NOT NAMED | 22.0 | 99.6 | 35 | 0   |
| 1903 | 9 | 9  | 6  | 3 | NOT NAMED | 21.4 | 72.4 | 50 | 0   |
| 1903 | 9 | 9  | 12 | 3 | NOT NAMED | 21.8 | 73.4 | 50 | 0   |
| 1903 | 9 | 9  | 18 | 3 | NOT NAMED | 22.2 | 74.0 | 50 | 0   |
| 1903 | 9 | 10 | 0  | 3 | NOT NAMED | 22.6 | 74.7 | 55 | 0   |
| 1903 | 9 | 10 | 6  | 3 | NOT NAMED | 23.2 | 75.3 | 60 | 0   |
| 1903 | 9 | 10 | 12 | 3 | NOT NAMED | 23.8 | 76.0 | 65 | 0   |
| 1903 | 9 | 10 | 18 | 3 | NOT NAMED | 24.5 | 76.7 | 70 | 0   |
| 1903 | 9 | 11 | 0  | 3 | NOT NAMED | 25.1 | 77.5 | 75 | 0   |
| 1903 | 9 | 11 | 6  | 3 | NOT NAMED | 25.5 | 78.2 | 75 | 0   |
| 1903 | 9 | 11 | 12 | 3 | NOT NAMED | 25.7 | 78.9 | 75 | 0   |
| 1903 | 9 | 11 | 18 | 3 | NOT NAMED | 25.9 | 79.6 | 75 | 976 |
| 1903 | 9 | 12 | 0  | 3 | NOT NAMED | 26.2 | 80.3 | 70 | 0   |
| 1903 | 9 | 12 | 6  | 3 | NOT NAMED | 26.7 | 81.2 | 60 | 0   |
| 1903 | 9 | 12 | 12 | 3 | NOT NAMED | 27.3 | 82.1 | 55 | 988 |
| 1903 | 9 | 12 | 18 | 3 | NOT NAMED | 27.7 | 82.9 | 50 | 0   |
| 1903 | 9 | 13 | 0  | 3 | NOT NAMED | 28.1 | 83.6 | 60 | 0   |
| 1903 | 9 | 13 | 6  | 3 | NOT NAMED | 28.5 | 84.2 | 70 | 0   |
| 1903 | 9 | 13 | 12 | 3 | NOT NAMED | 28.9 | 84.8 | 80 | 0   |
| 1903 | 9 | 13 | 18 | 3 | NOT NAMED | 29.5 | 85.3 | 80 | 0   |
| 1903 | 9 | 14 | 0  | 3 | NOT NAMED | 30.3 | 85.7 | 80 | 0   |
| 1903 | 9 | 14 | 6  | 3 | NOT NAMED | 31.0 | 85.9 | 60 | 0   |
| 1903 | 9 | 14 | 12 | 3 | NOT NAMED | 31.6 | 86.0 | 45 | 0   |
| 1903 | 9 | 14 | 18 | 3 | NOT NAMED | 32.0 | 86.0 | 35 | 0   |
| 1903 | 9 | 15 | 0  | 3 | NOT NAMED | 32.4 | 85.9 | 35 | 0   |
| 1903 | 9 | 15 | 6  | 3 | NOT NAMED | 32.7 | 85.6 | 35 | 0   |
| 1903 | 9 | 15 | 12 | 3 | NOT NAMED | 33.0 | 85.3 | 35 | 0   |
| 1903 | 9 | 15 | 18 | 3 | NOT NAMED | 33.3 | 84.9 | 35 | 0   |
| 1903 | 9 | 16 | 0  | 3 | NOT NAMED | 33.6 | 84.3 | 30 | 0   |
| 1903 | 9 | 16 | 6  | 3 | NOT NAMED | 33.8 | 83.7 | 30 | 0   |
| 1903 | 9 | 16 | 12 | 3 | NOT NAMED | 34.0 | 83.0 | 30 | 0   |
| 1903 | 9 | 16 | 18 | 3 | NOT NAMED | 33.9 | 82.3 | 30 | 0   |
| 1903 | 9 | 12 | 0  | 4 | NOT NAMED | 22.5 | 55.6 | 60 | 0   |
| 1903 | 9 | 12 | 6  | 4 | NOT NAMED | 23.3 | 56.4 | 60 | 0   |
| 1903 | 9 | 12 | 12 | 4 | NOT NAMED | 24.2 | 57.3 | 60 | 0   |
| 1903 | 9 | 12 | 18 | 4 | NOT NAMED | 25.4 | 58.7 | 60 | 0   |
| 1903 | 9 | 13 | 0  | 4 | NOT NAMED | 26.5 | 60.4 | 60 | 0   |
| 1903 | 9 | 13 | 6  | 4 | NOT NAMED | 27.4 | 62.2 | 60 | 0   |
| 1903 | 9 | 13 | 12 | 4 | NOT NAMED | 28.0 | 64.0 | 60 | 0   |
| 1903 | 9 | 13 | 18 | 4 | NOT NAMED | 28.4 | 65.2 | 60 | 0   |
| 1903 | 9 | 14 | 0  | 4 | NOT NAMED | 28.8 | 66.5 | 60 | 0   |
| 1903 | 9 | 14 | 6  | 4 | NOT NAMED | 29.1 | 67.8 | 60 | 0   |
| 1903 | 9 | 14 | 12 | 4 | NOT NAMED | 29.5 | 69.0 | 60 | 0   |

|      |         |             |      |      |    |     |
|------|---------|-------------|------|------|----|-----|
| 1903 | 9 14 18 | 4 NOT NAMED | 30.1 | 70.3 | 65 | 0   |
| 1903 | 9 15 0  | 4 NOT NAMED | 30.8 | 71.5 | 70 | 0   |
| 1903 | 9 15 6  | 4 NOT NAMED | 31.6 | 72.6 | 75 | 0   |
| 1903 | 9 15 12 | 4 NOT NAMED | 32.5 | 73.3 | 80 | 0   |
| 1903 | 9 15 18 | 4 NOT NAMED | 34.1 | 74.0 | 85 | 0   |
| 1903 | 9 16 0  | 4 NOT NAMED | 36.2 | 74.5 | 80 | 0   |
| 1903 | 9 16 6  | 4 NOT NAMED | 38.0 | 74.6 | 75 | 0   |
| 1903 | 9 16 12 | 4 NOT NAMED | 39.3 | 74.7 | 70 | 990 |
| 1903 | 9 16 18 | 4 NOT NAMED | 40.3 | 75.0 | 55 | 0   |
| 1903 | 9 17 0  | 4 NOT NAMED | 41.1 | 75.5 | 55 | 0   |
| 1903 | 9 17 6  | 4 NOT NAMED | 41.9 | 76.3 | 45 | 0   |
| 1903 | 9 17 12 | 4 NOT NAMED | 43.0 | 77.0 | 40 | 0   |
| 1903 | 9 17 18 | 4 NOT NAMED | 44.8 | 77.0 | 30 | 0   |
| 1903 | 9 19 0  | 5 NOT NAMED | 20.8 | 71.6 | 30 | 0   |
| 1903 | 9 19 6  | 5 NOT NAMED | 21.3 | 71.7 | 30 | 0   |
| 1903 | 9 19 12 | 5 NOT NAMED | 21.7 | 71.7 | 30 | 0   |
| 1903 | 9 19 18 | 5 NOT NAMED | 22.0 | 71.7 | 30 | 0   |
| 1903 | 9 20 0  | 5 NOT NAMED | 22.3 | 71.7 | 30 | 0   |
| 1903 | 9 20 6  | 5 NOT NAMED | 22.6 | 71.7 | 30 | 0   |
| 1903 | 9 20 12 | 5 NOT NAMED | 23.0 | 71.7 | 30 | 0   |
| 1903 | 9 20 18 | 5 NOT NAMED | 23.5 | 71.8 | 30 | 0   |
| 1903 | 9 21 0  | 5 NOT NAMED | 24.1 | 72.0 | 30 | 0   |
| 1903 | 9 21 6  | 5 NOT NAMED | 24.6 | 72.2 | 30 | 0   |
| 1903 | 9 21 12 | 5 NOT NAMED | 25.0 | 72.5 | 30 | 0   |
| 1903 | 9 21 18 | 5 NOT NAMED | 25.5 | 72.7 | 30 | 0   |
| 1903 | 9 22 0  | 5 NOT NAMED | 26.0 | 72.9 | 30 | 0   |
| 1903 | 9 22 6  | 5 NOT NAMED | 26.5 | 73.1 | 30 | 0   |
| 1903 | 9 22 12 | 5 NOT NAMED | 27.0 | 73.3 | 35 | 0   |
| 1903 | 9 22 18 | 5 NOT NAMED | 27.5 | 73.5 | 35 | 0   |
| 1903 | 9 23 0  | 5 NOT NAMED | 27.9 | 73.6 | 40 | 0   |
| 1903 | 9 23 6  | 5 NOT NAMED | 28.5 | 73.6 | 40 | 0   |
| 1903 | 9 23 12 | 5 NOT NAMED | 29.0 | 73.7 | 45 | 0   |
| 1903 | 9 23 18 | 5 NOT NAMED | 30.0 | 73.9 | 45 | 0   |
| 1903 | 9 24 0  | 5 NOT NAMED | 31.4 | 74.0 | 50 | 0   |
| 1903 | 9 24 6  | 5 NOT NAMED | 32.8 | 73.8 | 50 | 0   |
| 1903 | 9 24 12 | 5 NOT NAMED | 34.0 | 73.0 | 50 | 0   |
| 1903 | 9 24 18 | 5 NOT NAMED | 34.7 | 71.6 | 50 | 0   |
| 1903 | 9 25 0  | 5 NOT NAMED | 35.1 | 70.4 | 50 | 0   |
| 1903 | 9 25 6  | 5 NOT NAMED | 35.4 | 69.0 | 45 | 0   |
| 1903 | 9 25 12 | 5 NOT NAMED | 35.5 | 67.5 | 45 | 0   |
| 1903 | 9 25 18 | 5 NOT NAMED | 36.0 | 65.3 | 40 | 0   |
| 1903 | 9 26 0  | 5 NOT NAMED | 36.7 | 62.7 | 35 | 0   |
| 1903 | 9 26 6  | 5 NOT NAMED | 37.3 | 60.1 | 30 | 0   |
| 1903 | 9 26 12 | 5 NOT NAMED | 37.8 | 57.5 | 25 | 0   |



|      |    |    |    |   |           |      |      |    |   |
|------|----|----|----|---|-----------|------|------|----|---|
| 1903 | 9  | 26 | 18 | 5 | NOT NAMED | 38.2 | 55.6 | 25 | 0 |
| 1903 | 9  | 26 | 6  | 6 | NOT NAMED | 22.9 | 58.8 | 40 | 0 |
| 1903 | 9  | 26 | 12 | 6 | NOT NAMED | 23.3 | 60.0 | 40 | 0 |
| 1903 | 9  | 26 | 18 | 6 | NOT NAMED | 23.6 | 61.6 | 40 | 0 |
| 1903 | 9  | 27 | 0  | 6 | NOT NAMED | 23.9 | 62.8 | 45 | 0 |
| 1903 | 9  | 27 | 6  | 6 | NOT NAMED | 24.3 | 63.8 | 50 | 0 |
| 1903 | 9  | 27 | 12 | 6 | NOT NAMED | 24.8 | 64.6 | 55 | 0 |
| 1903 | 9  | 27 | 18 | 6 | NOT NAMED | 26.0 | 65.3 | 60 | 0 |
| 1903 | 9  | 28 | 0  | 6 | NOT NAMED | 27.3 | 65.7 | 70 | 0 |
| 1903 | 9  | 28 | 6  | 6 | NOT NAMED | 28.7 | 65.7 | 80 | 0 |
| 1903 | 9  | 28 | 12 | 6 | NOT NAMED | 30.0 | 65.5 | 90 | 0 |
| 1903 | 9  | 28 | 18 | 6 | NOT NAMED | 32.1 | 64.2 | 95 | 0 |
| 1903 | 9  | 29 | 0  | 6 | NOT NAMED | 34.1 | 62.3 | 95 | 0 |
| 1903 | 9  | 29 | 6  | 6 | NOT NAMED | 36.0 | 59.1 | 95 | 0 |
| 1903 | 9  | 29 | 12 | 6 | NOT NAMED | 37.5 | 56.3 | 90 | 0 |
| 1903 | 9  | 29 | 18 | 6 | NOT NAMED | 39.4 | 52.8 | 85 | 0 |
| 1903 | 9  | 30 | 0  | 6 | NOT NAMED | 41.2 | 48.6 | 80 | 0 |
| 1903 | 9  | 30 | 6  | 6 | NOT NAMED | 42.7 | 44.8 | 75 | 0 |
| 1903 | 9  | 30 | 12 | 6 | NOT NAMED | 44.5 | 40.5 | 70 | 0 |
| 1903 | 9  | 30 | 18 | 6 | NOT NAMED | 46.5 | 35.5 | 60 | 0 |
| 1903 | 10 | 1  | 0  | 7 | NOT NAMED | 17.7 | 57.3 | 60 | 0 |
| 1903 | 10 | 1  | 6  | 7 | NOT NAMED | 18.1 | 57.9 | 60 | 0 |
| 1903 | 10 | 1  | 12 | 7 | NOT NAMED | 18.5 | 58.5 | 60 | 0 |
| 1903 | 10 | 1  | 18 | 7 | NOT NAMED | 19.4 | 60.0 | 60 | 0 |
| 1903 | 10 | 2  | 0  | 7 | NOT NAMED | 20.3 | 61.0 | 65 | 0 |
| 1903 | 10 | 2  | 6  | 7 | NOT NAMED | 21.5 | 62.2 | 70 | 0 |
| 1903 | 10 | 2  | 12 | 7 | NOT NAMED | 23.0 | 63.5 | 70 | 0 |
| 1903 | 10 | 2  | 18 | 7 | NOT NAMED | 24.3 | 63.8 | 70 | 0 |
| 1903 | 10 | 3  | 0  | 7 | NOT NAMED | 25.4 | 63.7 | 70 | 0 |
| 1903 | 10 | 3  | 6  | 7 | NOT NAMED | 26.3 | 63.4 | 70 | 0 |
| 1903 | 10 | 3  | 12 | 7 | NOT NAMED | 27.3 | 63.0 | 75 | 0 |
| 1903 | 10 | 3  | 18 | 7 | NOT NAMED | 28.0 | 62.7 | 75 | 0 |
| 1903 | 10 | 4  | 0  | 7 | NOT NAMED | 28.9 | 62.2 | 80 | 0 |
| 1903 | 10 | 4  | 6  | 7 | NOT NAMED | 29.5 | 61.6 | 80 | 0 |
| 1903 | 10 | 4  | 12 | 7 | NOT NAMED | 30.0 | 60.7 | 85 | 0 |
| 1903 | 10 | 4  | 18 | 7 | NOT NAMED | 30.5 | 59.1 | 85 | 0 |
| 1903 | 10 | 5  | 0  | 7 | NOT NAMED | 30.6 | 57.2 | 85 | 0 |
| 1903 | 10 | 5  | 6  | 7 | NOT NAMED | 30.4 | 55.2 | 85 | 0 |
| 1903 | 10 | 5  | 12 | 7 | NOT NAMED | 30.0 | 53.4 | 85 | 0 |
| 1903 | 10 | 5  | 18 | 7 | NOT NAMED | 29.5 | 51.9 | 80 | 0 |
| 1903 | 10 | 6  | 0  | 7 | NOT NAMED | 28.9 | 50.2 | 75 | 0 |
| 1903 | 10 | 6  | 6  | 7 | NOT NAMED | 28.1 | 48.8 | 70 | 0 |
| 1903 | 10 | 6  | 12 | 7 | NOT NAMED | 27.0 | 48.0 | 70 | 0 |
| 1903 | 10 | 6  | 18 | 7 | NOT NAMED | 26.8 | 48.2 | 70 | 0 |

|      |    |    |    |             |      |      |    |   |
|------|----|----|----|-------------|------|------|----|---|
| 1903 | 10 | 7  | 0  | 7 NOT NAMED | 26.7 | 48.4 | 70 | 0 |
| 1903 | 10 | 7  | 6  | 7 NOT NAMED | 26.8 | 48.7 | 70 | 0 |
| 1903 | 10 | 7  | 12 | 7 NOT NAMED | 27.0 | 49.0 | 70 | 0 |
| 1903 | 10 | 7  | 18 | 7 NOT NAMED | 27.6 | 48.8 | 70 | 0 |
| 1903 | 10 | 8  | 0  | 7 NOT NAMED | 28.0 | 48.2 | 70 | 0 |
| 1903 | 10 | 8  | 6  | 7 NOT NAMED | 28.2 | 47.2 | 70 | 0 |
| 1903 | 10 | 8  | 12 | 7 NOT NAMED | 28.3 | 46.2 | 70 | 0 |
| 1903 | 10 | 8  | 18 | 7 NOT NAMED | 28.5 | 45.0 | 65 | 0 |
| 1903 | 10 | 9  | 0  | 7 NOT NAMED | 29.0 | 43.1 | 65 | 0 |
| 1903 | 10 | 9  | 6  | 7 NOT NAMED | 29.5 | 41.5 | 60 | 0 |
| 1903 | 10 | 9  | 12 | 7 NOT NAMED | 30.0 | 40.0 | 50 | 0 |
| 1903 | 10 | 9  | 18 | 7 NOT NAMED | 30.5 | 38.7 | 45 | 0 |
| 1903 | 10 | 10 | 0  | 7 NOT NAMED | 30.9 | 37.5 | 40 | 0 |
| 1903 | 10 | 10 | 6  | 7 NOT NAMED | 31.6 | 36.2 | 35 | 0 |
| 1903 | 10 | 10 | 12 | 7 NOT NAMED | 32.4 | 35.0 | 35 | 0 |
| 1903 | 10 | 10 | 18 | 7 NOT NAMED | 33.6 | 33.2 | 35 | 0 |
| 1903 | 10 | 5  | 0  | 8 NOT NAMED | 25.5 | 72.5 | 35 | 0 |
| 1903 | 10 | 5  | 6  | 8 NOT NAMED | 25.7 | 72.3 | 35 | 0 |
| 1903 | 10 | 5  | 12 | 8 NOT NAMED | 26.0 | 72.0 | 40 | 0 |
| 1903 | 10 | 5  | 18 | 8 NOT NAMED | 26.3 | 71.7 | 40 | 0 |
| 1903 | 10 | 6  | 0  | 8 NOT NAMED | 26.6 | 71.3 | 40 | 0 |
| 1903 | 10 | 6  | 6  | 8 NOT NAMED | 26.9 | 70.9 | 40 | 0 |
| 1903 | 10 | 6  | 12 | 8 NOT NAMED | 27.2 | 70.5 | 40 | 0 |
| 1903 | 10 | 6  | 18 | 8 NOT NAMED | 27.5 | 70.1 | 40 | 0 |
| 1903 | 10 | 7  | 0  | 8 NOT NAMED | 27.8 | 69.7 | 40 | 0 |
| 1903 | 10 | 7  | 6  | 8 NOT NAMED | 28.1 | 69.3 | 40 | 0 |
| 1903 | 10 | 7  | 12 | 8 NOT NAMED | 28.5 | 68.8 | 40 | 0 |
| 1903 | 10 | 7  | 18 | 8 NOT NAMED | 29.0 | 68.2 | 45 | 0 |
| 1903 | 10 | 8  | 0  | 8 NOT NAMED | 29.5 | 67.4 | 50 | 0 |
| 1903 | 10 | 8  | 6  | 8 NOT NAMED | 30.0 | 66.9 | 55 | 0 |
| 1903 | 10 | 8  | 12 | 8 NOT NAMED | 30.5 | 66.5 | 60 | 0 |
| 1903 | 10 | 8  | 18 | 8 NOT NAMED | 31.1 | 66.2 | 60 | 0 |
| 1903 | 10 | 9  | 0  | 8 NOT NAMED | 31.7 | 65.9 | 60 | 0 |
| 1903 | 10 | 9  | 6  | 8 NOT NAMED | 32.3 | 65.7 | 60 | 0 |
| 1903 | 10 | 9  | 12 | 8 NOT NAMED | 33.0 | 65.5 | 60 | 0 |
| 1903 | 10 | 9  | 18 | 8 NOT NAMED | 33.7 | 65.3 | 60 | 0 |
| 1903 | 10 | 10 | 0  | 8 NOT NAMED | 34.5 | 65.2 | 55 | 0 |
| 1903 | 10 | 10 | 6  | 8 NOT NAMED | 35.3 | 65.1 | 50 | 0 |
| 1903 | 10 | 10 | 12 | 8 NOT NAMED | 36.1 | 65.0 | 50 | 0 |
| 1903 | 10 | 10 | 18 | 8 NOT NAMED | 37.2 | 64.8 | 50 | 0 |
| 1903 | 10 | 21 | 6  | 9 NOT NAMED | 21.2 | 72.0 | 30 | 0 |
| 1903 | 10 | 21 | 12 | 9 NOT NAMED | 21.5 | 72.5 | 30 | 0 |
| 1903 | 10 | 21 | 18 | 9 NOT NAMED | 21.9 | 72.9 | 30 | 0 |
| 1903 | 10 | 22 | 0  | 9 NOT NAMED | 22.5 | 73.3 | 30 | 0 |

|      |    |    |    |    |           |      |      |    |   |
|------|----|----|----|----|-----------|------|------|----|---|
| 1903 | 10 | 22 | 6  | 9  | NOT NAMED | 23.2 | 73.6 | 30 | 0 |
| 1903 | 10 | 22 | 12 | 9  | NOT NAMED | 24.0 | 74.0 | 30 | 0 |
| 1903 | 10 | 22 | 18 | 9  | NOT NAMED | 24.8 | 74.2 | 30 | 0 |
| 1903 | 10 | 23 | 0  | 9  | NOT NAMED | 25.6 | 74.3 | 30 | 0 |
| 1903 | 10 | 23 | 6  | 9  | NOT NAMED | 26.3 | 74.3 | 30 | 0 |
| 1903 | 10 | 23 | 12 | 9  | NOT NAMED | 27.0 | 74.3 | 35 | 0 |
| 1903 | 10 | 23 | 18 | 9  | NOT NAMED | 27.9 | 74.5 | 40 | 0 |
| 1903 | 10 | 24 | 0  | 9  | NOT NAMED | 29.0 | 74.8 | 45 | 0 |
| 1903 | 10 | 24 | 6  | 9  | NOT NAMED | 30.1 | 75.1 | 50 | 0 |
| 1903 | 10 | 24 | 12 | 9  | NOT NAMED | 31.2 | 75.0 | 50 | 0 |
| 1903 | 10 | 24 | 18 | 9  | NOT NAMED | 32.4 | 74.5 | 50 | 0 |
| 1903 | 10 | 25 | 0  | 9  | NOT NAMED | 33.6 | 73.1 | 50 | 0 |
| 1903 | 10 | 25 | 6  | 9  | NOT NAMED | 34.5 | 71.5 | 50 | 0 |
| 1903 | 10 | 25 | 12 | 9  | NOT NAMED | 35.8 | 69.5 | 50 | 0 |
| 1903 | 10 | 25 | 18 | 9  | NOT NAMED | 38.0 | 66.9 | 50 | 0 |
| 1903 | 10 | 26 | 0  | 9  | NOT NAMED | 40.5 | 63.7 | 50 | 0 |
| 1903 | 10 | 26 | 6  | 9  | NOT NAMED | 42.8 | 60.4 | 50 | 0 |
| 1903 | 10 | 26 | 12 | 9  | NOT NAMED | 45.0 | 57.5 | 45 | 0 |
| 1903 | 10 | 26 | 18 | 9  | NOT NAMED | 47.3 | 55.4 | 40 | 0 |
| 1903 | 10 | 27 | 0  | 9  | NOT NAMED | 49.1 | 53.7 | 40 | 0 |
| 1903 | 10 | 27 | 6  | 9  | NOT NAMED | 51.1 | 52.4 | 40 | 0 |
| 1903 | 10 | 27 | 12 | 9  | NOT NAMED | 53.0 | 51.0 | 35 | 0 |
| 1903 | 10 | 27 | 18 | 9  | NOT NAMED | 55.2 | 49.5 | 35 | 0 |
| 1903 | 11 | 17 | 6  | 10 | NOT NAMED | 19.0 | 37.0 | 35 | 0 |
| 1903 | 11 | 17 | 12 | 10 | NOT NAMED | 19.5 | 38.5 | 35 | 0 |
| 1903 | 11 | 17 | 18 | 10 | NOT NAMED | 19.9 | 39.7 | 35 | 0 |
| 1903 | 11 | 18 | 0  | 10 | NOT NAMED | 20.4 | 41.3 | 35 | 0 |
| 1903 | 11 | 18 | 6  | 10 | NOT NAMED | 21.1 | 42.9 | 35 | 0 |
| 1903 | 11 | 18 | 12 | 10 | NOT NAMED | 21.9 | 44.4 | 35 | 0 |
| 1903 | 11 | 18 | 18 | 10 | NOT NAMED | 22.8 | 45.6 | 35 | 0 |
| 1903 | 11 | 19 | 0  | 10 | NOT NAMED | 23.7 | 46.8 | 35 | 0 |
| 1903 | 11 | 19 | 6  | 10 | NOT NAMED | 24.5 | 48.0 | 40 | 0 |
| 1903 | 11 | 19 | 12 | 10 | NOT NAMED | 25.5 | 49.3 | 45 | 0 |
| 1903 | 11 | 19 | 18 | 10 | NOT NAMED | 26.4 | 49.8 | 50 | 0 |
| 1903 | 11 | 20 | 0  | 10 | NOT NAMED | 27.3 | 49.6 | 60 | 0 |
| 1903 | 11 | 20 | 6  | 10 | NOT NAMED | 28.2 | 49.3 | 65 | 0 |
| 1903 | 11 | 20 | 12 | 10 | NOT NAMED | 29.0 | 48.5 | 70 | 0 |
| 1903 | 11 | 20 | 18 | 10 | NOT NAMED | 29.2 | 47.7 | 70 | 0 |
| 1903 | 11 | 21 | 0  | 10 | NOT NAMED | 29.3 | 47.1 | 70 | 0 |
| 1903 | 11 | 21 | 6  | 10 | NOT NAMED | 29.3 | 46.2 | 70 | 0 |
| 1903 | 11 | 21 | 12 | 10 | NOT NAMED | 29.3 | 45.4 | 70 | 0 |
| 1903 | 11 | 21 | 18 | 10 | NOT NAMED | 29.5 | 44.7 | 70 | 0 |
| 1903 | 11 | 22 | 0  | 10 | NOT NAMED | 29.7 | 44.1 | 70 | 0 |
| 1903 | 11 | 22 | 6  | 10 | NOT NAMED | 30.0 | 43.6 | 70 | 0 |

|      |    |    |    |    |           |      |      |    |   |
|------|----|----|----|----|-----------|------|------|----|---|
| 1903 | 11 | 22 | 12 | 10 | NOT NAMED | 30.4 | 43.2 | 70 | 0 |
| 1903 | 11 | 22 | 18 | 10 | NOT NAMED | 31.3 | 42.9 | 70 | 0 |
| 1903 | 11 | 23 | 0  | 10 | NOT NAMED | 32.8 | 42.7 | 70 | 0 |
| 1903 | 11 | 23 | 6  | 10 | NOT NAMED | 34.3 | 42.5 | 70 | 0 |
| 1903 | 11 | 23 | 12 | 10 | NOT NAMED | 35.4 | 42.3 | 70 | 0 |
| 1903 | 11 | 23 | 18 | 10 | NOT NAMED | 36.3 | 42.1 | 70 | 0 |
| 1903 | 11 | 24 | 0  | 10 | NOT NAMED | 37.0 | 41.9 | 70 | 0 |
| 1903 | 11 | 24 | 6  | 10 | NOT NAMED | 37.7 | 41.7 | 70 | 0 |
| 1903 | 11 | 24 | 12 | 10 | NOT NAMED | 38.5 | 41.4 | 70 | 0 |
| 1903 | 11 | 24 | 18 | 10 | NOT NAMED | 39.4 | 40.9 | 70 | 0 |
| 1903 | 11 | 25 | 0  | 10 | NOT NAMED | 40.3 | 40.5 | 65 | 0 |
| 1903 | 11 | 25 | 6  | 10 | NOT NAMED | 41.3 | 40.0 | 65 | 0 |
| 1903 | 11 | 25 | 12 | 10 | NOT NAMED | 42.2 | 39.6 | 65 | 0 |
| 1903 | 11 | 25 | 18 | 10 | NOT NAMED | 43.5 | 38.9 | 50 | 0 |
| 1904 | 6  | 10 | 12 | 1  | NOT NAMED | 13.0 | 80.5 | 30 | 0 |
| 1904 | 6  | 10 | 18 | 1  | NOT NAMED | 13.6 | 80.7 | 30 | 0 |
| 1904 | 6  | 11 | 0  | 1  | NOT NAMED | 14.2 | 80.7 | 30 | 0 |
| 1904 | 6  | 11 | 6  | 1  | NOT NAMED | 14.6 | 80.5 | 30 | 0 |
| 1904 | 6  | 11 | 12 | 1  | NOT NAMED | 15.0 | 80.3 | 30 | 0 |
| 1904 | 6  | 11 | 18 | 1  | NOT NAMED | 15.7 | 80.2 | 30 | 0 |
| 1904 | 6  | 12 | 0  | 1  | NOT NAMED | 16.2 | 80.1 | 35 | 0 |
| 1904 | 6  | 12 | 6  | 1  | NOT NAMED | 16.8 | 79.9 | 40 | 0 |
| 1904 | 6  | 12 | 12 | 1  | NOT NAMED | 17.3 | 79.7 | 45 | 0 |
| 1904 | 6  | 12 | 18 | 1  | NOT NAMED | 17.7 | 79.5 | 50 | 0 |
| 1904 | 6  | 13 | 0  | 1  | NOT NAMED | 18.1 | 79.2 | 55 | 0 |
| 1904 | 6  | 13 | 6  | 1  | NOT NAMED | 18.4 | 78.9 | 60 | 0 |
| 1904 | 6  | 13 | 12 | 1  | NOT NAMED | 18.7 | 78.5 | 65 | 0 |
| 1904 | 6  | 13 | 18 | 1  | NOT NAMED | 19.4 | 77.7 | 70 | 0 |
| 1904 | 6  | 14 | 0  | 1  | NOT NAMED | 20.3 | 76.8 | 55 | 0 |
| 1904 | 6  | 14 | 6  | 1  | NOT NAMED | 21.1 | 76.0 | 40 | 0 |
| 1904 | 6  | 14 | 12 | 1  | NOT NAMED | 22.0 | 75.3 | 35 | 0 |
| 1904 | 6  | 14 | 18 | 1  | NOT NAMED | 22.9 | 74.6 | 25 | 0 |
| 1904 | 9  | 8  | 0  | 2  | NOT NAMED | 16.2 | 54.0 | 50 | 0 |
| 1904 | 9  | 8  | 6  | 2  | NOT NAMED | 16.7 | 54.8 | 50 | 0 |
| 1904 | 9  | 8  | 12 | 2  | NOT NAMED | 17.3 | 55.7 | 50 | 0 |
| 1904 | 9  | 8  | 18 | 2  | NOT NAMED | 18.1 | 57.1 | 50 | 0 |
| 1904 | 9  | 9  | 0  | 2  | NOT NAMED | 19.0 | 58.6 | 50 | 0 |
| 1904 | 9  | 9  | 6  | 2  | NOT NAMED | 19.9 | 60.3 | 50 | 0 |
| 1904 | 9  | 9  | 12 | 2  | NOT NAMED | 21.0 | 62.0 | 50 | 0 |
| 1904 | 9  | 9  | 18 | 2  | NOT NAMED | 21.7 | 63.0 | 50 | 0 |
| 1904 | 9  | 10 | 0  | 2  | NOT NAMED | 22.5 | 64.2 | 50 | 0 |
| 1904 | 9  | 10 | 6  | 2  | NOT NAMED | 23.4 | 65.5 | 50 | 0 |
| 1904 | 9  | 10 | 12 | 2  | NOT NAMED | 24.0 | 66.5 | 50 | 0 |
| 1904 | 9  | 10 | 18 | 2  | NOT NAMED | 24.7 | 67.3 | 50 | 0 |

|      |    |    |    |             |      |      |    |   |
|------|----|----|----|-------------|------|------|----|---|
| 1904 | 9  | 11 | 0  | 2 NOT NAMED | 25.1 | 68.0 | 50 | 0 |
| 1904 | 9  | 11 | 6  | 2 NOT NAMED | 25.5 | 69.0 | 50 | 0 |
| 1904 | 9  | 11 | 12 | 2 NOT NAMED | 25.9 | 70.0 | 50 | 0 |
| 1904 | 9  | 11 | 18 | 2 NOT NAMED | 26.2 | 70.8 | 50 | 0 |
| 1904 | 9  | 12 | 0  | 2 NOT NAMED | 26.6 | 71.6 | 55 | 0 |
| 1904 | 9  | 12 | 6  | 2 NOT NAMED | 26.8 | 72.3 | 60 | 0 |
| 1904 | 9  | 12 | 12 | 2 NOT NAMED | 27.0 | 73.0 | 65 | 0 |
| 1904 | 9  | 12 | 18 | 2 NOT NAMED | 27.2 | 73.8 | 70 | 0 |
| 1904 | 9  | 13 | 0  | 2 NOT NAMED | 27.6 | 74.7 | 70 | 0 |
| 1904 | 9  | 13 | 6  | 2 NOT NAMED | 28.1 | 75.7 | 70 | 0 |
| 1904 | 9  | 13 | 12 | 2 NOT NAMED | 29.0 | 76.7 | 70 | 0 |
| 1904 | 9  | 13 | 18 | 2 NOT NAMED | 29.7 | 77.4 | 70 | 0 |
| 1904 | 9  | 14 | 0  | 2 NOT NAMED | 30.4 | 78.0 | 70 | 0 |
| 1904 | 9  | 14 | 6  | 2 NOT NAMED | 31.5 | 78.5 | 70 | 0 |
| 1904 | 9  | 14 | 12 | 2 NOT NAMED | 32.7 | 79.0 | 70 | 0 |
| 1904 | 9  | 14 | 18 | 2 NOT NAMED | 34.6 | 79.5 | 60 | 0 |
| 1904 | 9  | 15 | 0  | 2 NOT NAMED | 36.5 | 77.6 | 55 | 0 |
| 1904 | 9  | 15 | 6  | 2 NOT NAMED | 39.1 | 75.0 | 65 | 0 |
| 1904 | 9  | 15 | 12 | 2 NOT NAMED | 42.0 | 70.3 | 75 | 0 |
| 1904 | 9  | 15 | 18 | 2 NOT NAMED | 45.9 | 64.0 | 55 | 0 |
| 1904 | 10 | 12 | 6  | 3 NOT NAMED | 15.3 | 75.7 | 35 | 0 |
| 1904 | 10 | 12 | 12 | 3 NOT NAMED | 15.3 | 76.4 | 35 | 0 |
| 1904 | 10 | 12 | 18 | 3 NOT NAMED | 15.4 | 77.1 | 35 | 0 |
| 1904 | 10 | 13 | 0  | 3 NOT NAMED | 15.9 | 77.7 | 35 | 0 |
| 1904 | 10 | 13 | 6  | 3 NOT NAMED | 16.4 | 78.2 | 35 | 0 |
| 1904 | 10 | 13 | 12 | 3 NOT NAMED | 17.0 | 78.7 | 40 | 0 |
| 1904 | 10 | 13 | 18 | 3 NOT NAMED | 17.5 | 79.1 | 40 | 0 |
| 1904 | 10 | 14 | 0  | 3 NOT NAMED | 18.0 | 79.3 | 40 | 0 |
| 1904 | 10 | 14 | 6  | 3 NOT NAMED | 18.6 | 79.5 | 40 | 0 |
| 1904 | 10 | 14 | 12 | 3 NOT NAMED | 19.3 | 79.7 | 45 | 0 |
| 1904 | 10 | 14 | 18 | 3 NOT NAMED | 19.8 | 79.8 | 50 | 0 |
| 1904 | 10 | 15 | 0  | 3 NOT NAMED | 20.1 | 79.9 | 55 | 0 |
| 1904 | 10 | 15 | 6  | 3 NOT NAMED | 20.6 | 79.9 | 60 | 0 |
| 1904 | 10 | 15 | 12 | 3 NOT NAMED | 21.0 | 80.0 | 65 | 0 |
| 1904 | 10 | 15 | 18 | 3 NOT NAMED | 21.4 | 80.0 | 65 | 0 |
| 1904 | 10 | 16 | 0  | 3 NOT NAMED | 21.7 | 80.0 | 65 | 0 |
| 1904 | 10 | 16 | 6  | 3 NOT NAMED | 22.0 | 80.0 | 55 | 0 |
| 1904 | 10 | 16 | 12 | 3 NOT NAMED | 22.5 | 80.0 | 50 | 0 |
| 1904 | 10 | 16 | 18 | 3 NOT NAMED | 23.3 | 79.9 | 55 | 0 |
| 1904 | 10 | 17 | 0  | 3 NOT NAMED | 24.2 | 79.9 | 65 | 0 |
| 1904 | 10 | 17 | 6  | 3 NOT NAMED | 25.1 | 80.1 | 70 | 0 |
| 1904 | 10 | 17 | 12 | 3 NOT NAMED | 25.7 | 80.7 | 60 | 0 |
| 1904 | 10 | 17 | 18 | 3 NOT NAMED | 25.9 | 80.9 | 50 | 0 |
| 1904 | 10 | 18 | 0  | 3 NOT NAMED | 26.2 | 81.1 | 45 | 0 |

|            |    |             |      |      |    |   |
|------------|----|-------------|------|------|----|---|
| 1904 10 18 | 6  | 3 NOT NAMED | 26.5 | 81.4 | 40 | 0 |
| 1904 10 18 | 12 | 3 NOT NAMED | 26.7 | 81.7 | 40 | 0 |
| 1904 10 18 | 18 | 3 NOT NAMED | 26.8 | 82.3 | 35 | 0 |
| 1904 10 19 | 0  | 3 NOT NAMED | 26.7 | 82.5 | 35 | 0 |
| 1904 10 19 | 6  | 3 NOT NAMED | 26.6 | 82.6 | 35 | 0 |
| 1904 10 19 | 12 | 3 NOT NAMED | 26.3 | 82.7 | 35 | 0 |
| 1904 10 19 | 18 | 3 NOT NAMED | 25.9 | 82.6 | 35 | 0 |
| 1904 10 20 | 0  | 3 NOT NAMED | 25.6 | 82.2 | 35 | 0 |
| 1904 10 20 | 6  | 3 NOT NAMED | 25.4 | 81.6 | 35 | 0 |
| 1904 10 20 | 12 | 3 NOT NAMED | 25.5 | 81.0 | 35 | 0 |
| 1904 10 20 | 18 | 3 NOT NAMED | 25.8 | 80.0 | 30 | 0 |
| 1904 10 21 | 0  | 3 NOT NAMED | 26.1 | 79.0 | 25 | 0 |
| 1904 10 21 | 6  | 3 NOT NAMED | 26.5 | 78.2 | 20 | 0 |
| 1904 10 21 | 12 | 3 NOT NAMED | 27.0 | 77.0 | 20 | 0 |
| 1904 10 21 | 18 | 3 NOT NAMED | 27.4 | 75.9 | 20 | 0 |
| 1904 10 19 | 6  | 4 NOT NAMED | 25.8 | 45.4 | 35 | 0 |
| 1904 10 19 | 12 | 4 NOT NAMED | 25.0 | 46.3 | 35 | 0 |
| 1904 10 19 | 18 | 4 NOT NAMED | 23.8 | 47.5 | 35 | 0 |
| 1904 10 20 | 0  | 4 NOT NAMED | 22.7 | 48.8 | 35 | 0 |
| 1904 10 20 | 6  | 4 NOT NAMED | 22.1 | 50.3 | 35 | 0 |
| 1904 10 20 | 12 | 4 NOT NAMED | 22.5 | 51.6 | 35 | 0 |
| 1904 10 20 | 18 | 4 NOT NAMED | 23.0 | 52.2 | 35 | 0 |
| 1904 10 21 | 0  | 4 NOT NAMED | 23.6 | 52.3 | 40 | 0 |
| 1904 10 21 | 6  | 4 NOT NAMED | 24.3 | 52.2 | 40 | 0 |
| 1904 10 21 | 12 | 4 NOT NAMED | 25.0 | 52.0 | 45 | 0 |
| 1904 10 21 | 18 | 4 NOT NAMED | 26.0 | 52.2 | 45 | 0 |
| 1904 10 22 | 0  | 4 NOT NAMED | 26.7 | 52.8 | 45 | 0 |
| 1904 10 22 | 6  | 4 NOT NAMED | 27.5 | 53.6 | 45 | 0 |
| 1904 10 22 | 12 | 4 NOT NAMED | 28.5 | 54.5 | 40 | 0 |
| 1904 10 22 | 18 | 4 NOT NAMED | 29.6 | 55.3 | 35 | 0 |
| 1904 10 23 | 0  | 4 NOT NAMED | 31.1 | 56.1 | 35 | 0 |
| 1904 10 23 | 6  | 4 NOT NAMED | 32.8 | 56.8 | 35 | 0 |
| 1904 10 23 | 12 | 4 NOT NAMED | 35.0 | 57.5 | 35 | 0 |
| 1904 10 23 | 18 | 4 NOT NAMED | 36.7 | 57.5 | 35 | 0 |
| 1904 10 24 | 0  | 4 NOT NAMED | 39.2 | 56.7 | 35 | 0 |
| 1904 10 24 | 6  | 4 NOT NAMED | 41.7 | 55.6 | 35 | 0 |
| 1904 10 24 | 12 | 4 NOT NAMED | 44.5 | 54.0 | 35 | 0 |
| 1904 10 24 | 18 | 4 NOT NAMED | 47.3 | 51.2 | 35 | 0 |
| 1904 10 25 | 0  | 4 NOT NAMED | 50.4 | 48.4 | 35 | 0 |
| 1904 10 25 | 6  | 4 NOT NAMED | 53.4 | 45.4 | 35 | 0 |
| 1904 10 25 | 12 | 4 NOT NAMED | 56.0 | 42.5 | 35 | 0 |
| 1904 10 25 | 18 | 4 NOT NAMED | 57.8 | 39.5 | 35 | 0 |
| 1904 10 31 | 12 | 5 NOT NAMED | 20.0 | 91.3 | 35 | 0 |
| 1904 10 31 | 18 | 5 NOT NAMED | 20.4 | 91.8 | 35 | 0 |

|      |    |    |    |             |      |      |    |   |
|------|----|----|----|-------------|------|------|----|---|
| 1904 | 11 | 1  | 0  | 5 NOT NAMED | 21.0 | 92.0 | 35 | 0 |
| 1904 | 11 | 1  | 6  | 5 NOT NAMED | 21.6 | 92.2 | 40 | 0 |
| 1904 | 11 | 1  | 12 | 5 NOT NAMED | 22.3 | 92.0 | 40 | 0 |
| 1904 | 11 | 1  | 18 | 5 NOT NAMED | 23.1 | 91.7 | 45 | 0 |
| 1904 | 11 | 2  | 0  | 5 NOT NAMED | 23.8 | 91.4 | 45 | 0 |
| 1904 | 11 | 2  | 6  | 5 NOT NAMED | 24.4 | 91.1 | 45 | 0 |
| 1904 | 11 | 2  | 12 | 5 NOT NAMED | 25.3 | 90.7 | 40 | 0 |
| 1904 | 11 | 2  | 18 | 5 NOT NAMED | 26.5 | 89.8 | 35 | 0 |
| 1904 | 11 | 3  | 0  | 5 NOT NAMED | 27.8 | 88.9 | 35 | 0 |
| 1904 | 11 | 3  | 6  | 5 NOT NAMED | 29.1 | 88.1 | 35 | 0 |
| 1904 | 11 | 3  | 12 | 5 NOT NAMED | 30.3 | 86.7 | 35 | 0 |
| 1904 | 11 | 3  | 18 | 5 NOT NAMED | 31.3 | 84.8 | 30 | 0 |
| 1904 | 11 | 4  | 0  | 5 NOT NAMED | 32.1 | 82.7 | 30 | 0 |
| 1904 | 11 | 4  | 6  | 5 NOT NAMED | 32.9 | 80.4 | 30 | 0 |
| 1904 | 11 | 4  | 12 | 5 NOT NAMED | 33.5 | 78.0 | 35 | 0 |
| 1904 | 11 | 4  | 18 | 5 NOT NAMED | 33.8 | 76.0 | 35 | 0 |
| 1904 | 11 | 5  | 0  | 5 NOT NAMED | 34.5 | 73.4 | 35 | 0 |
| 1904 | 11 | 5  | 6  | 5 NOT NAMED | 35.1 | 71.1 | 35 | 0 |
| 1904 | 11 | 5  | 12 | 5 NOT NAMED | 36.0 | 68.7 | 35 | 0 |
| 1904 | 11 | 5  | 18 | 5 NOT NAMED | 37.7 | 66.0 | 35 | 0 |
| 1904 | 11 | 6  | 0  | 5 NOT NAMED | 40.0 | 62.4 | 35 | 0 |
| 1904 | 11 | 6  | 6  | 5 NOT NAMED | 42.4 | 59.3 | 35 | 0 |
| 1904 | 11 | 6  | 12 | 5 NOT NAMED | 45.0 | 57.5 | 35 | 0 |
| 1904 | 11 | 6  | 18 | 5 NOT NAMED | 46.6 | 55.7 | 35 | 0 |
| 1905 | 9  | 6  | 12 | 1 NOT NAMED | 11.6 | 58.5 | 50 | 0 |
| 1905 | 9  | 6  | 18 | 1 NOT NAMED | 12.0 | 59.8 | 50 | 0 |
| 1905 | 9  | 7  | 0  | 1 NOT NAMED | 12.5 | 61.1 | 50 | 0 |
| 1905 | 9  | 7  | 6  | 1 NOT NAMED | 13.0 | 62.8 | 50 | 0 |
| 1905 | 9  | 7  | 12 | 1 NOT NAMED | 13.5 | 64.3 | 40 | 0 |
| 1905 | 9  | 7  | 18 | 1 NOT NAMED | 13.9 | 65.8 | 35 | 0 |
| 1905 | 9  | 8  | 0  | 1 NOT NAMED | 14.4 | 67.3 | 30 | 0 |
| 1905 | 9  | 8  | 6  | 1 NOT NAMED | 14.9 | 68.9 | 30 | 0 |
| 1905 | 9  | 8  | 12 | 1 NOT NAMED | 15.3 | 70.3 | 30 | 0 |
| 1905 | 9  | 8  | 18 | 1 NOT NAMED | 15.9 | 72.1 | 25 | 0 |
| 1905 | 9  | 11 | 12 | 2 NOT NAMED | 19.5 | 51.0 | 35 | 0 |
| 1905 | 9  | 11 | 18 | 2 NOT NAMED | 19.7 | 52.1 | 35 | 0 |
| 1905 | 9  | 12 | 0  | 2 NOT NAMED | 20.0 | 53.3 | 35 | 0 |
| 1905 | 9  | 12 | 6  | 2 NOT NAMED | 20.2 | 54.1 | 35 | 0 |
| 1905 | 9  | 12 | 12 | 2 NOT NAMED | 20.5 | 55.0 | 40 | 0 |
| 1905 | 9  | 12 | 18 | 2 NOT NAMED | 21.0 | 56.0 | 40 | 0 |
| 1905 | 9  | 13 | 0  | 2 NOT NAMED | 21.4 | 56.8 | 40 | 0 |
| 1905 | 9  | 13 | 6  | 2 NOT NAMED | 21.8 | 57.4 | 45 | 0 |
| 1905 | 9  | 13 | 12 | 2 NOT NAMED | 22.1 | 57.9 | 50 | 0 |
| 1905 | 9  | 13 | 18 | 2 NOT NAMED | 22.3 | 58.3 | 50 | 0 |

|      |    |    |    |             |      |      |    |   |
|------|----|----|----|-------------|------|------|----|---|
| 1905 | 9  | 14 | 0  | 2 NOT NAMED | 22.6 | 58.6 | 50 | 0 |
| 1905 | 9  | 14 | 6  | 2 NOT NAMED | 22.9 | 58.8 | 50 | 0 |
| 1905 | 9  | 14 | 12 | 2 NOT NAMED | 23.2 | 59.1 | 45 | 0 |
| 1905 | 9  | 14 | 18 | 2 NOT NAMED | 23.8 | 59.4 | 40 | 0 |
| 1905 | 9  | 15 | 0  | 2 NOT NAMED | 24.4 | 59.7 | 35 | 0 |
| 1905 | 9  | 15 | 6  | 2 NOT NAMED | 25.0 | 60.0 | 35 | 0 |
| 1905 | 9  | 15 | 12 | 2 NOT NAMED | 25.5 | 60.3 | 35 | 0 |
| 1905 | 9  | 15 | 18 | 2 NOT NAMED | 25.9 | 60.6 | 35 | 0 |
| 1905 | 9  | 16 | 0  | 2 NOT NAMED | 26.3 | 61.1 | 35 | 0 |
| 1905 | 9  | 16 | 6  | 2 NOT NAMED | 26.7 | 61.5 | 35 | 0 |
| 1905 | 9  | 16 | 12 | 2 NOT NAMED | 27.0 | 62.0 | 30 | 0 |
| 1905 | 9  | 16 | 18 | 2 NOT NAMED | 27.2 | 62.5 | 30 | 0 |
| 1905 | 9  | 24 | 6  | 3 NOT NAMED | 17.7 | 84.0 | 35 | 0 |
| 1905 | 9  | 24 | 12 | 3 NOT NAMED | 18.2 | 84.7 | 35 | 0 |
| 1905 | 9  | 24 | 18 | 3 NOT NAMED | 18.6 | 85.4 | 35 | 0 |
| 1905 | 9  | 25 | 0  | 3 NOT NAMED | 19.0 | 86.0 | 35 | 0 |
| 1905 | 9  | 25 | 6  | 3 NOT NAMED | 19.4 | 86.7 | 40 | 0 |
| 1905 | 9  | 25 | 12 | 3 NOT NAMED | 19.9 | 87.4 | 40 | 0 |
| 1905 | 9  | 25 | 18 | 3 NOT NAMED | 20.4 | 88.1 | 35 | 0 |
| 1905 | 9  | 26 | 0  | 3 NOT NAMED | 20.9 | 88.8 | 35 | 0 |
| 1905 | 9  | 26 | 6  | 3 NOT NAMED | 21.5 | 89.7 | 35 | 0 |
| 1905 | 9  | 26 | 12 | 3 NOT NAMED | 22.2 | 90.5 | 45 | 0 |
| 1905 | 9  | 26 | 18 | 3 NOT NAMED | 22.9 | 90.9 | 45 | 0 |
| 1905 | 9  | 27 | 0  | 3 NOT NAMED | 23.7 | 91.4 | 45 | 0 |
| 1905 | 9  | 27 | 6  | 3 NOT NAMED | 24.5 | 91.8 | 45 | 0 |
| 1905 | 9  | 27 | 12 | 3 NOT NAMED | 25.3 | 92.0 | 45 | 0 |
| 1905 | 9  | 27 | 18 | 3 NOT NAMED | 25.9 | 92.2 | 45 | 0 |
| 1905 | 9  | 28 | 0  | 3 NOT NAMED | 26.5 | 92.4 | 45 | 0 |
| 1905 | 9  | 28 | 6  | 3 NOT NAMED | 27.2 | 92.6 | 45 | 0 |
| 1905 | 9  | 28 | 12 | 3 NOT NAMED | 27.7 | 92.7 | 45 | 0 |
| 1905 | 9  | 28 | 18 | 3 NOT NAMED | 28.3 | 92.8 | 45 | 0 |
| 1905 | 9  | 29 | 0  | 3 NOT NAMED | 28.7 | 92.7 | 45 | 0 |
| 1905 | 9  | 29 | 6  | 3 NOT NAMED | 29.2 | 92.6 | 45 | 0 |
| 1905 | 9  | 29 | 12 | 3 NOT NAMED | 29.8 | 92.5 | 40 | 0 |
| 1905 | 9  | 29 | 18 | 3 NOT NAMED | 30.6 | 91.8 | 35 | 0 |
| 1905 | 9  | 30 | 0  | 3 NOT NAMED | 31.7 | 90.9 | 35 | 0 |
| 1905 | 9  | 30 | 6  | 3 NOT NAMED | 33.0 | 91.2 | 35 | 0 |
| 1905 | 9  | 30 | 12 | 3 NOT NAMED | 34.1 | 92.0 | 35 | 0 |
| 1905 | 9  | 30 | 18 | 3 NOT NAMED | 34.8 | 93.4 | 30 | 0 |
| 1905 | 10 | 1  | 6  | 4 NOT NAMED | 11.0 | 79.2 | 30 | 0 |
| 1905 | 10 | 1  | 12 | 4 NOT NAMED | 11.0 | 79.0 | 30 | 0 |
| 1905 | 10 | 1  | 18 | 4 NOT NAMED | 11.1 | 78.8 | 30 | 0 |
| 1905 | 10 | 2  | 0  | 4 NOT NAMED | 11.3 | 78.7 | 30 | 0 |
| 1905 | 10 | 2  | 6  | 4 NOT NAMED | 11.5 | 78.6 | 30 | 0 |



|         |       |             |      |      |     |     |
|---------|-------|-------------|------|------|-----|-----|
| 1905 10 | 2 12  | 4 NOT NAMED | 11.7 | 78.5 | 30  | 0   |
| 1905 10 | 2 18  | 4 NOT NAMED | 11.9 | 78.3 | 30  | 0   |
| 1905 10 | 3 0   | 4 NOT NAMED | 12.1 | 78.2 | 35  | 0   |
| 1905 10 | 3 6   | 4 NOT NAMED | 12.4 | 78.1 | 35  | 0   |
| 1905 10 | 3 12  | 4 NOT NAMED | 12.7 | 78.0 | 35  | 0   |
| 1905 10 | 3 18  | 4 NOT NAMED | 13.2 | 77.9 | 35  | 0   |
| 1905 10 | 4 0   | 4 NOT NAMED | 13.7 | 77.8 | 40  | 0   |
| 1905 10 | 4 6   | 4 NOT NAMED | 14.1 | 77.7 | 40  | 0   |
| 1905 10 | 4 12  | 4 NOT NAMED | 14.5 | 77.5 | 45  | 0   |
| 1905 10 | 4 18  | 4 NOT NAMED | 15.2 | 77.0 | 45  | 0   |
| 1905 10 | 5 0   | 4 NOT NAMED | 15.8 | 76.5 | 50  | 0   |
| 1905 10 | 5 6   | 4 NOT NAMED | 16.3 | 76.0 | 50  | 0   |
| 1905 10 | 5 12  | 4 NOT NAMED | 17.0 | 75.5 | 55  | 0   |
| 1905 10 | 5 18  | 4 NOT NAMED | 18.1 | 74.8 | 55  | 0   |
| 1905 10 | 6 0   | 4 NOT NAMED | 19.2 | 74.2 | 60  | 0   |
| 1905 10 | 6 6   | 4 NOT NAMED | 20.2 | 73.6 | 60  | 0   |
| 1905 10 | 6 12  | 4 NOT NAMED | 21.0 | 73.0 | 60  | 0   |
| 1905 10 | 6 18  | 4 NOT NAMED | 22.1 | 72.3 | 60  | 0   |
| 1905 10 | 7 0   | 4 NOT NAMED | 23.2 | 71.7 | 60  | 0   |
| 1905 10 | 7 6   | 4 NOT NAMED | 24.3 | 71.1 | 60  | 0   |
| 1905 10 | 7 12  | 4 NOT NAMED | 25.3 | 70.5 | 60  | 0   |
| 1905 10 | 7 18  | 4 NOT NAMED | 26.4 | 69.6 | 60  | 0   |
| 1905 10 | 8 0   | 4 NOT NAMED | 27.3 | 68.6 | 65  | 0   |
| 1905 10 | 8 6   | 4 NOT NAMED | 28.1 | 67.6 | 70  | 0   |
| 1905 10 | 8 12  | 4 NOT NAMED | 29.0 | 66.5 | 75  | 0   |
| 1905 10 | 8 18  | 4 NOT NAMED | 30.1 | 65.0 | 85  | 0   |
| 1905 10 | 9 0   | 4 NOT NAMED | 30.8 | 63.7 | 95  | 0   |
| 1905 10 | 9 6   | 4 NOT NAMED | 31.7 | 62.1 | 105 | 0   |
| 1905 10 | 9 12  | 4 NOT NAMED | 32.3 | 60.5 | 105 | 0   |
| 1905 10 | 9 18  | 4 NOT NAMED | 32.9 | 57.5 | 105 | 0   |
| 1905 10 | 10 0  | 4 NOT NAMED | 33.3 | 54.8 | 105 | 0   |
| 1905 10 | 10 6  | 4 NOT NAMED | 34.0 | 52.2 | 100 | 0   |
| 1905 10 | 10 12 | 4 NOT NAMED | 35.0 | 50.0 | 95  | 0   |
| 1905 10 | 10 18 | 4 NOT NAMED | 36.3 | 48.6 | 90  | 0   |
| 1905 10 | 11 0  | 4 NOT NAMED | 37.9 | 47.9 | 85  | 0   |
| 1905 10 | 11 6  | 4 NOT NAMED | 39.6 | 47.1 | 80  | 0   |
| 1905 10 | 11 12 | 4 NOT NAMED | 41.0 | 46.0 | 80  | 0   |
| 1905 10 | 11 18 | 4 NOT NAMED | 42.9 | 44.8 | 80  | 945 |
| 1905 10 | 12 0  | 4 NOT NAMED | 45.2 | 45.0 | 75  | 0   |
| 1905 10 | 12 6  | 4 NOT NAMED | 47.0 | 46.0 | 70  | 0   |
| 1905 10 | 12 12 | 4 NOT NAMED | 49.0 | 47.5 | 65  | 0   |
| 1905 10 | 12 18 | 4 NOT NAMED | 50.1 | 48.4 | 55  | 0   |
| 1905 10 | 13 0  | 4 NOT NAMED | 51.0 | 49.2 | 45  | 0   |
| 1905 10 | 13 6  | 4 NOT NAMED | 52.1 | 50.1 | 35  | 0   |

|      |    |    |    |   |           |      |      |    |   |
|------|----|----|----|---|-----------|------|------|----|---|
| 1905 | 10 | 13 | 12 | 4 | NOT NAMED | 53.0 | 51.0 | 35 | 0 |
| 1905 | 10 | 13 | 18 | 4 | NOT NAMED | 54.0 | 52.1 | 35 | 0 |
| 1905 | 10 | 5  | 6  | 5 | NOT NAMED | 23.0 | 88.9 | 35 | 0 |
| 1905 | 10 | 5  | 12 | 5 | NOT NAMED | 23.0 | 89.5 | 40 | 0 |
| 1905 | 10 | 5  | 18 | 5 | NOT NAMED | 23.0 | 89.9 | 40 | 0 |
| 1905 | 10 | 6  | 0  | 5 | NOT NAMED | 23.1 | 90.4 | 40 | 0 |
| 1905 | 10 | 6  | 6  | 5 | NOT NAMED | 23.3 | 90.8 | 40 | 0 |
| 1905 | 10 | 6  | 12 | 5 | NOT NAMED | 23.6 | 91.1 | 40 | 0 |
| 1905 | 10 | 6  | 18 | 5 | NOT NAMED | 24.0 | 91.6 | 40 | 0 |
| 1905 | 10 | 7  | 0  | 5 | NOT NAMED | 24.4 | 92.0 | 40 | 0 |
| 1905 | 10 | 7  | 6  | 5 | NOT NAMED | 24.9 | 92.4 | 40 | 0 |
| 1905 | 10 | 7  | 12 | 5 | NOT NAMED | 25.2 | 92.6 | 40 | 0 |
| 1905 | 10 | 7  | 18 | 5 | NOT NAMED | 25.6 | 92.7 | 40 | 0 |
| 1905 | 10 | 8  | 0  | 5 | NOT NAMED | 25.8 | 92.7 | 45 | 0 |
| 1905 | 10 | 8  | 6  | 5 | NOT NAMED | 26.0 | 92.6 | 45 | 0 |
| 1905 | 10 | 8  | 12 | 5 | NOT NAMED | 26.3 | 92.5 | 45 | 0 |
| 1905 | 10 | 8  | 18 | 5 | NOT NAMED | 26.7 | 92.4 | 45 | 0 |
| 1905 | 10 | 9  | 0  | 5 | NOT NAMED | 27.3 | 92.3 | 45 | 0 |
| 1905 | 10 | 9  | 6  | 5 | NOT NAMED | 28.0 | 92.2 | 45 | 0 |
| 1905 | 10 | 9  | 12 | 5 | NOT NAMED | 28.7 | 92.0 | 45 | 0 |
| 1905 | 10 | 9  | 18 | 5 | NOT NAMED | 29.6 | 91.3 | 40 | 0 |
| 1905 | 10 | 10 | 0  | 5 | NOT NAMED | 30.7 | 90.5 | 35 | 0 |
| 1905 | 10 | 10 | 6  | 5 | NOT NAMED | 32.0 | 89.8 | 30 | 0 |
| 1905 | 10 | 10 | 12 | 5 | NOT NAMED | 33.5 | 88.7 | 25 | 0 |
| 1905 | 10 | 10 | 18 | 5 | NOT NAMED | 34.7 | 86.5 | 25 | 0 |
| 1905 | 10 | 11 | 0  | 5 | NOT NAMED | 35.6 | 84.3 | 25 | 0 |
| 1905 | 10 | 11 | 6  | 5 | NOT NAMED | 36.4 | 82.4 | 25 | 0 |
| 1905 | 10 | 11 | 12 | 5 | NOT NAMED | 37.3 | 80.0 | 25 | 0 |
| 1905 | 10 | 11 | 18 | 5 | NOT NAMED | 38.5 | 77.7 | 25 | 0 |
| 1906 | 6  | 8  | 12 | 1 | NOT NAMED | 19.4 | 83.6 | 35 | 0 |
| 1906 | 6  | 8  | 18 | 1 | NOT NAMED | 20.4 | 83.7 | 35 | 0 |
| 1906 | 6  | 9  | 0  | 1 | NOT NAMED | 21.4 | 83.8 | 35 | 0 |
| 1906 | 6  | 9  | 6  | 1 | NOT NAMED | 22.2 | 83.9 | 35 | 0 |
| 1906 | 6  | 9  | 12 | 1 | NOT NAMED | 23.0 | 84.0 | 40 | 0 |
| 1906 | 6  | 9  | 18 | 1 | NOT NAMED | 23.5 | 84.1 | 45 | 0 |
| 1906 | 6  | 10 | 0  | 1 | NOT NAMED | 23.9 | 84.2 | 45 | 0 |
| 1906 | 6  | 10 | 6  | 1 | NOT NAMED | 24.4 | 84.2 | 45 | 0 |
| 1906 | 6  | 10 | 12 | 1 | NOT NAMED | 25.0 | 84.3 | 45 | 0 |
| 1906 | 6  | 10 | 18 | 1 | NOT NAMED | 25.4 | 84.4 | 45 | 0 |
| 1906 | 6  | 11 | 0  | 1 | NOT NAMED | 25.8 | 84.6 | 45 | 0 |
| 1906 | 6  | 11 | 6  | 1 | NOT NAMED | 26.1 | 84.8 | 45 | 0 |
| 1906 | 6  | 11 | 12 | 1 | NOT NAMED | 26.5 | 85.0 | 45 | 0 |
| 1906 | 6  | 11 | 18 | 1 | NOT NAMED | 27.0 | 85.2 | 45 | 0 |
| 1906 | 6  | 12 | 0  | 1 | NOT NAMED | 27.5 | 85.4 | 45 | 0 |

|      |      |    |             |      |      |    |     |
|------|------|----|-------------|------|------|----|-----|
| 1906 | 6 12 | 6  | 1 NOT NAMED | 28.0 | 85.5 | 45 | 0   |
| 1906 | 6 12 | 12 | 1 NOT NAMED | 28.7 | 85.5 | 45 | 0   |
| 1906 | 6 12 | 18 | 1 NOT NAMED | 29.6 | 85.6 | 45 | 0   |
| 1906 | 6 13 | 0  | 1 NOT NAMED | 30.7 | 85.6 | 40 | 0   |
| 1906 | 6 13 | 6  | 1 NOT NAMED | 31.8 | 85.7 | 35 | 0   |
| 1906 | 6 13 | 12 | 1 NOT NAMED | 33.0 | 85.7 | 35 | 0   |
| 1906 | 6 13 | 18 | 1 NOT NAMED | 34.6 | 86.5 | 30 | 0   |
| 1906 | 6 14 | 0  | 1 NOT NAMED | 36.2 | 87.7 | 30 | 0   |
| 1906 | 6 14 | 6  | 1 NOT NAMED | 38.0 | 89.1 | 30 | 0   |
| 1906 | 6 14 | 12 | 1 NOT NAMED | 40.0 | 89.5 | 30 | 0   |
| 1906 | 6 14 | 18 | 1 NOT NAMED | 41.8 | 89.8 | 30 | 0   |
| 1906 | 6 14 | 6  | 2 NOT NAMED | 22.9 | 76.4 | 35 | 0   |
| 1906 | 6 14 | 12 | 2 NOT NAMED | 23.0 | 77.5 | 35 | 0   |
| 1906 | 6 14 | 18 | 2 NOT NAMED | 23.1 | 78.2 | 35 | 0   |
| 1906 | 6 15 | 0  | 2 NOT NAMED | 23.1 | 79.0 | 35 | 0   |
| 1906 | 6 15 | 6  | 2 NOT NAMED | 23.2 | 79.8 | 40 | 0   |
| 1906 | 6 15 | 12 | 2 NOT NAMED | 23.3 | 80.5 | 40 | 0   |
| 1906 | 6 15 | 18 | 2 NOT NAMED | 23.3 | 80.8 | 45 | 0   |
| 1906 | 6 16 | 0  | 2 NOT NAMED | 23.3 | 81.1 | 50 | 0   |
| 1906 | 6 16 | 6  | 2 NOT NAMED | 23.3 | 81.3 | 55 | 0   |
| 1906 | 6 16 | 12 | 2 NOT NAMED | 23.5 | 81.5 | 60 | 0   |
| 1906 | 6 16 | 18 | 2 NOT NAMED | 24.0 | 81.5 | 65 | 0   |
| 1906 | 6 17 | 0  | 2 NOT NAMED | 24.5 | 81.3 | 70 | 0   |
| 1906 | 6 17 | 6  | 2 NOT NAMED | 25.0 | 80.9 | 75 | 979 |
| 1906 | 6 17 | 12 | 2 NOT NAMED | 25.7 | 80.3 | 75 | 0   |
| 1906 | 6 17 | 18 | 2 NOT NAMED | 26.7 | 79.0 | 75 | 0   |
| 1906 | 6 18 | 0  | 2 NOT NAMED | 28.1 | 77.5 | 80 | 0   |
| 1906 | 6 18 | 6  | 2 NOT NAMED | 29.5 | 76.1 | 80 | 0   |
| 1906 | 6 18 | 12 | 2 NOT NAMED | 31.0 | 74.7 | 85 | 0   |
| 1906 | 6 18 | 18 | 2 NOT NAMED | 32.4 | 73.4 | 85 | 0   |
| 1906 | 6 19 | 0  | 2 NOT NAMED | 33.8 | 72.3 | 90 | 0   |
| 1906 | 6 19 | 6  | 2 NOT NAMED | 35.1 | 71.2 | 90 | 0   |
| 1906 | 6 19 | 12 | 2 NOT NAMED | 36.3 | 69.5 | 90 | 0   |
| 1906 | 6 19 | 18 | 2 NOT NAMED | 36.7 | 68.2 | 85 | 0   |
| 1906 | 6 20 | 0  | 2 NOT NAMED | 36.6 | 67.2 | 80 | 0   |
| 1906 | 6 20 | 6  | 2 NOT NAMED | 36.3 | 66.0 | 75 | 0   |
| 1906 | 6 20 | 12 | 2 NOT NAMED | 36.0 | 65.0 | 65 | 0   |
| 1906 | 6 20 | 18 | 2 NOT NAMED | 35.7 | 64.6 | 65 | 0   |
| 1906 | 6 21 | 0  | 2 NOT NAMED | 35.4 | 64.1 | 55 | 0   |
| 1906 | 6 21 | 6  | 2 NOT NAMED | 35.1 | 63.6 | 50 | 0   |
| 1906 | 6 21 | 12 | 2 NOT NAMED | 35.0 | 63.0 | 45 | 0   |
| 1906 | 6 21 | 18 | 2 NOT NAMED | 35.2 | 62.3 | 45 | 0   |
| 1906 | 6 22 | 0  | 2 NOT NAMED | 35.6 | 61.6 | 45 | 0   |
| 1906 | 6 22 | 6  | 2 NOT NAMED | 35.8 | 60.8 | 40 | 0   |

|      |         |             |      |      |    |   |
|------|---------|-------------|------|------|----|---|
| 1906 | 6 22 12 | 2 NOT NAMED | 36.0 | 60.0 | 40 | 0 |
| 1906 | 6 22 18 | 2 NOT NAMED | 36.3 | 59.0 | 40 | 0 |
| 1906 | 6 23 0  | 2 NOT NAMED | 36.5 | 57.8 | 35 | 0 |
| 1906 | 6 23 6  | 2 NOT NAMED | 36.8 | 56.5 | 35 | 0 |
| 1906 | 6 23 12 | 2 NOT NAMED | 37.0 | 55.1 | 35 | 0 |
| 1906 | 6 23 18 | 2 NOT NAMED | 37.3 | 53.0 | 30 | 0 |
| 1906 | 8 22 6  | 3 NOT NAMED | 28.7 | 53.1 | 30 | 0 |
| 1906 | 8 22 12 | 3 NOT NAMED | 29.0 | 54.0 | 30 | 0 |
| 1906 | 8 22 18 | 3 NOT NAMED | 29.4 | 54.8 | 30 | 0 |
| 1906 | 8 23 0  | 3 NOT NAMED | 29.9 | 55.6 | 35 | 0 |
| 1906 | 8 23 6  | 3 NOT NAMED | 30.5 | 56.5 | 35 | 0 |
| 1906 | 8 23 12 | 3 NOT NAMED | 31.3 | 56.7 | 40 | 0 |
| 1906 | 8 23 18 | 3 NOT NAMED | 32.1 | 56.4 | 45 | 0 |
| 1906 | 8 24 0  | 3 NOT NAMED | 32.6 | 55.8 | 50 | 0 |
| 1906 | 8 24 6  | 3 NOT NAMED | 33.0 | 55.1 | 55 | 0 |
| 1906 | 8 24 12 | 3 NOT NAMED | 33.8 | 54.1 | 60 | 0 |
| 1906 | 8 24 18 | 3 NOT NAMED | 34.9 | 52.8 | 60 | 0 |
| 1906 | 8 25 0  | 3 NOT NAMED | 36.4 | 51.2 | 55 | 0 |
| 1906 | 8 25 6  | 3 NOT NAMED | 37.5 | 49.7 | 50 | 0 |
| 1906 | 8 25 12 | 3 NOT NAMED | 39.0 | 48.0 | 45 | 0 |
| 1906 | 8 25 18 | 3 NOT NAMED | 40.2 | 46.3 | 40 | 0 |
| 1906 | 8 25 12 | 4 NOT NAMED | 14.0 | 21.0 | 35 | 0 |
| 1906 | 8 25 18 | 4 NOT NAMED | 14.0 | 22.5 | 35 | 0 |
| 1906 | 8 26 0  | 4 NOT NAMED | 14.0 | 24.0 | 40 | 0 |
| 1906 | 8 26 6  | 4 NOT NAMED | 14.0 | 25.5 | 40 | 0 |
| 1906 | 8 26 12 | 4 NOT NAMED | 14.0 | 27.0 | 45 | 0 |
| 1906 | 8 26 18 | 4 NOT NAMED | 14.0 | 28.5 | 45 | 0 |
| 1906 | 8 27 0  | 4 NOT NAMED | 14.0 | 30.0 | 50 | 0 |
| 1906 | 8 27 6  | 4 NOT NAMED | 14.0 | 31.5 | 50 | 0 |
| 1906 | 8 27 12 | 4 NOT NAMED | 14.0 | 33.0 | 55 | 0 |
| 1906 | 8 27 18 | 4 NOT NAMED | 14.0 | 34.6 | 55 | 0 |
| 1906 | 8 28 0  | 4 NOT NAMED | 13.9 | 36.2 | 60 | 0 |
| 1906 | 8 28 6  | 4 NOT NAMED | 13.9 | 37.8 | 60 | 0 |
| 1906 | 8 28 12 | 4 NOT NAMED | 13.8 | 39.5 | 65 | 0 |
| 1906 | 8 28 18 | 4 NOT NAMED | 13.8 | 41.2 | 65 | 0 |
| 1906 | 8 29 0  | 4 NOT NAMED | 13.7 | 42.8 | 70 | 0 |
| 1906 | 8 29 6  | 4 NOT NAMED | 13.7 | 44.4 | 70 | 0 |
| 1906 | 8 29 12 | 4 NOT NAMED | 13.6 | 46.0 | 70 | 0 |
| 1906 | 8 29 18 | 4 NOT NAMED | 13.6 | 47.7 | 70 | 0 |
| 1906 | 8 30 0  | 4 NOT NAMED | 13.6 | 49.3 | 75 | 0 |
| 1906 | 8 30 6  | 4 NOT NAMED | 13.5 | 50.9 | 75 | 0 |
| 1906 | 8 30 12 | 4 NOT NAMED | 13.5 | 52.5 | 75 | 0 |
| 1906 | 8 30 18 | 4 NOT NAMED | 13.7 | 54.0 | 80 | 0 |
| 1906 | 8 31 0  | 4 NOT NAMED | 14.1 | 55.3 | 80 | 0 |

|      |   |    |    |             |      |      |     |     |
|------|---|----|----|-------------|------|------|-----|-----|
| 1906 | 8 | 31 | 6  | 4 NOT NAMED | 14.5 | 56.5 | 80  | 0   |
| 1906 | 8 | 31 | 12 | 4 NOT NAMED | 15.0 | 57.5 | 85  | 0   |
| 1906 | 8 | 31 | 18 | 4 NOT NAMED | 15.5 | 58.3 | 85  | 0   |
| 1906 | 9 | 1  | 0  | 4 NOT NAMED | 16.0 | 59.0 | 85  | 0   |
| 1906 | 9 | 1  | 6  | 4 NOT NAMED | 16.5 | 60.0 | 85  | 0   |
| 1906 | 9 | 1  | 12 | 4 NOT NAMED | 17.0 | 60.7 | 90  | 0   |
| 1906 | 9 | 1  | 18 | 4 NOT NAMED | 17.5 | 61.4 | 90  | 0   |
| 1906 | 9 | 2  | 0  | 4 NOT NAMED | 18.0 | 62.2 | 90  | 0   |
| 1906 | 9 | 2  | 6  | 4 NOT NAMED | 18.5 | 63.1 | 90  | 0   |
| 1906 | 9 | 2  | 12 | 4 NOT NAMED | 19.0 | 64.0 | 90  | 0   |
| 1906 | 9 | 2  | 18 | 4 NOT NAMED | 19.3 | 64.7 | 95  | 0   |
| 1906 | 9 | 3  | 0  | 4 NOT NAMED | 19.6 | 65.4 | 95  | 0   |
| 1906 | 9 | 3  | 6  | 4 NOT NAMED | 19.8 | 66.0 | 100 | 0   |
| 1906 | 9 | 3  | 12 | 4 NOT NAMED | 20.0 | 66.7 | 100 | 0   |
| 1906 | 9 | 3  | 18 | 4 NOT NAMED | 20.3 | 67.6 | 105 | 0   |
| 1906 | 9 | 4  | 0  | 4 NOT NAMED | 20.6 | 68.3 | 105 | 0   |
| 1906 | 9 | 4  | 6  | 4 NOT NAMED | 20.9 | 69.0 | 110 | 0   |
| 1906 | 9 | 4  | 12 | 4 NOT NAMED | 21.3 | 69.6 | 110 | 0   |
| 1906 | 9 | 4  | 18 | 4 NOT NAMED | 21.6 | 70.2 | 110 | 0   |
| 1906 | 9 | 5  | 0  | 4 NOT NAMED | 22.1 | 70.8 | 115 | 0   |
| 1906 | 9 | 5  | 6  | 4 NOT NAMED | 22.5 | 71.4 | 115 | 0   |
| 1906 | 9 | 5  | 12 | 4 NOT NAMED | 23.1 | 72.0 | 115 | 0   |
| 1906 | 9 | 5  | 18 | 4 NOT NAMED | 23.5 | 72.7 | 115 | 0   |
| 1906 | 9 | 6  | 0  | 4 NOT NAMED | 23.9 | 73.4 | 115 | 0   |
| 1906 | 9 | 6  | 6  | 4 NOT NAMED | 24.4 | 74.0 | 115 | 0   |
| 1906 | 9 | 6  | 12 | 4 NOT NAMED | 25.0 | 74.7 | 115 | 0   |
| 1906 | 9 | 6  | 18 | 4 NOT NAMED | 25.8 | 75.6 | 110 | 0   |
| 1906 | 9 | 7  | 0  | 4 NOT NAMED | 26.8 | 76.4 | 110 | 0   |
| 1906 | 9 | 7  | 6  | 4 NOT NAMED | 27.9 | 76.6 | 110 | 0   |
| 1906 | 9 | 7  | 12 | 4 NOT NAMED | 29.0 | 76.0 | 110 | 0   |
| 1906 | 9 | 7  | 18 | 4 NOT NAMED | 29.5 | 74.8 | 110 | 0   |
| 1906 | 9 | 8  | 0  | 4 NOT NAMED | 29.8 | 73.5 | 110 | 0   |
| 1906 | 9 | 8  | 6  | 4 NOT NAMED | 30.0 | 72.1 | 110 | 0   |
| 1906 | 9 | 8  | 12 | 4 NOT NAMED | 30.3 | 70.5 | 110 | 0   |
| 1906 | 9 | 8  | 18 | 4 NOT NAMED | 30.7 | 69.3 | 110 | 0   |
| 1906 | 9 | 9  | 0  | 4 NOT NAMED | 31.3 | 68.1 | 105 | 0   |
| 1906 | 9 | 9  | 6  | 4 NOT NAMED | 31.9 | 66.9 | 105 | 0   |
| 1906 | 9 | 9  | 12 | 4 NOT NAMED | 32.5 | 65.7 | 105 | 0   |
| 1906 | 9 | 9  | 18 | 4 NOT NAMED | 33.6 | 64.3 | 105 | 0   |
| 1906 | 9 | 10 | 0  | 4 NOT NAMED | 34.7 | 62.9 | 100 | 0   |
| 1906 | 9 | 10 | 6  | 4 NOT NAMED | 35.8 | 61.4 | 100 | 0   |
| 1906 | 9 | 10 | 12 | 4 NOT NAMED | 37.0 | 60.0 | 100 | 0   |
| 1906 | 9 | 10 | 18 | 4 NOT NAMED | 38.4 | 56.9 | 100 | 0   |
| 1906 | 9 | 11 | 0  | 4 NOT NAMED | 40.0 | 52.8 | 95  | 950 |

|      |   |    |    |             |      |      |    |   |
|------|---|----|----|-------------|------|------|----|---|
| 1906 | 9 | 11 | 6  | 4 NOT NAMED | 42.2 | 48.8 | 85 | 0 |
| 1906 | 9 | 11 | 12 | 4 NOT NAMED | 45.0 | 45.0 | 75 | 0 |
| 1906 | 9 | 11 | 18 | 4 NOT NAMED | 47.5 | 40.4 | 65 | 0 |
| 1906 | 9 | 12 | 0  | 4 NOT NAMED | 49.5 | 35.4 | 60 | 0 |
| 1906 | 9 | 12 | 6  | 4 NOT NAMED | 51.3 | 30.3 | 55 | 0 |
| 1906 | 9 | 12 | 12 | 4 NOT NAMED | 53.0 | 25.0 | 50 | 0 |
| 1906 | 9 | 12 | 18 | 4 NOT NAMED | 54.0 | 20.3 | 45 | 0 |
| 1906 | 9 | 3  | 12 | 5 NOT NAMED | 10.2 | 33.0 | 35 | 0 |
| 1906 | 9 | 3  | 18 | 5 NOT NAMED | 10.3 | 33.7 | 35 | 0 |
| 1906 | 9 | 4  | 0  | 5 NOT NAMED | 10.3 | 34.2 | 35 | 0 |
| 1906 | 9 | 4  | 6  | 5 NOT NAMED | 10.4 | 34.9 | 35 | 0 |
| 1906 | 9 | 4  | 12 | 5 NOT NAMED | 10.5 | 35.7 | 35 | 0 |
| 1906 | 9 | 4  | 18 | 5 NOT NAMED | 10.6 | 36.6 | 35 | 0 |
| 1906 | 9 | 5  | 0  | 5 NOT NAMED | 10.9 | 37.6 | 35 | 0 |
| 1906 | 9 | 5  | 6  | 5 NOT NAMED | 11.2 | 38.5 | 35 | 0 |
| 1906 | 9 | 5  | 12 | 5 NOT NAMED | 11.6 | 39.5 | 35 | 0 |
| 1906 | 9 | 5  | 18 | 5 NOT NAMED | 12.0 | 40.5 | 35 | 0 |
| 1906 | 9 | 6  | 0  | 5 NOT NAMED | 12.4 | 41.4 | 35 | 0 |
| 1906 | 9 | 6  | 6  | 5 NOT NAMED | 12.8 | 42.3 | 35 | 0 |
| 1906 | 9 | 6  | 12 | 5 NOT NAMED | 13.2 | 43.2 | 35 | 0 |
| 1906 | 9 | 6  | 18 | 5 NOT NAMED | 13.7 | 44.2 | 35 | 0 |
| 1906 | 9 | 7  | 0  | 5 NOT NAMED | 14.1 | 44.9 | 40 | 0 |
| 1906 | 9 | 7  | 6  | 5 NOT NAMED | 14.6 | 45.6 | 40 | 0 |
| 1906 | 9 | 7  | 12 | 5 NOT NAMED | 15.1 | 46.2 | 40 | 0 |
| 1906 | 9 | 7  | 18 | 5 NOT NAMED | 15.3 | 46.6 | 40 | 0 |
| 1906 | 9 | 8  | 0  | 5 NOT NAMED | 15.5 | 47.1 | 40 | 0 |
| 1906 | 9 | 8  | 6  | 5 NOT NAMED | 15.7 | 47.5 | 40 | 0 |
| 1906 | 9 | 8  | 12 | 5 NOT NAMED | 16.0 | 48.0 | 40 | 0 |
| 1906 | 9 | 8  | 18 | 5 NOT NAMED | 16.4 | 48.4 | 40 | 0 |
| 1906 | 9 | 9  | 0  | 5 NOT NAMED | 16.9 | 48.8 | 45 | 0 |
| 1906 | 9 | 9  | 6  | 5 NOT NAMED | 17.5 | 49.1 | 45 | 0 |
| 1906 | 9 | 9  | 12 | 5 NOT NAMED | 18.0 | 49.3 | 45 | 0 |
| 1906 | 9 | 9  | 18 | 5 NOT NAMED | 18.4 | 49.6 | 45 | 0 |
| 1906 | 9 | 10 | 0  | 5 NOT NAMED | 18.8 | 49.9 | 50 | 0 |
| 1906 | 9 | 10 | 6  | 5 NOT NAMED | 19.3 | 50.3 | 50 | 0 |
| 1906 | 9 | 10 | 12 | 5 NOT NAMED | 19.7 | 50.7 | 50 | 0 |
| 1906 | 9 | 10 | 18 | 5 NOT NAMED | 20.2 | 51.3 | 50 | 0 |
| 1906 | 9 | 11 | 0  | 5 NOT NAMED | 20.6 | 52.1 | 55 | 0 |
| 1906 | 9 | 11 | 6  | 5 NOT NAMED | 20.8 | 53.0 | 55 | 0 |
| 1906 | 9 | 11 | 12 | 5 NOT NAMED | 21.0 | 54.0 | 55 | 0 |
| 1906 | 9 | 11 | 18 | 5 NOT NAMED | 21.4 | 55.3 | 55 | 0 |
| 1906 | 9 | 12 | 0  | 5 NOT NAMED | 21.8 | 56.5 | 60 | 0 |
| 1906 | 9 | 12 | 6  | 5 NOT NAMED | 22.2 | 57.7 | 60 | 0 |
| 1906 | 9 | 12 | 12 | 5 NOT NAMED | 22.7 | 59.0 | 65 | 0 |

|      |         |             |      |      |    |     |
|------|---------|-------------|------|------|----|-----|
| 1906 | 9 12 18 | 5 NOT NAMED | 23.0 | 60.2 | 65 | 0   |
| 1906 | 9 13 0  | 5 NOT NAMED | 23.2 | 61.2 | 70 | 0   |
| 1906 | 9 13 6  | 5 NOT NAMED | 23.6 | 62.3 | 70 | 0   |
| 1906 | 9 13 12 | 5 NOT NAMED | 24.3 | 63.3 | 75 | 0   |
| 1906 | 9 13 18 | 5 NOT NAMED | 25.3 | 64.1 | 75 | 0   |
| 1906 | 9 14 0  | 5 NOT NAMED | 26.6 | 64.7 | 80 | 0   |
| 1906 | 9 14 6  | 5 NOT NAMED | 27.9 | 65.5 | 80 | 0   |
| 1906 | 9 14 12 | 5 NOT NAMED | 29.0 | 66.3 | 80 | 0   |
| 1906 | 9 14 18 | 5 NOT NAMED | 29.5 | 66.7 | 80 | 0   |
| 1906 | 9 15 0  | 5 NOT NAMED | 29.9 | 67.1 | 80 | 0   |
| 1906 | 9 15 6  | 5 NOT NAMED | 30.2 | 67.5 | 80 | 0   |
| 1906 | 9 15 12 | 5 NOT NAMED | 30.5 | 68.0 | 80 | 0   |
| 1906 | 9 15 18 | 5 NOT NAMED | 30.9 | 68.5 | 80 | 0   |
| 1906 | 9 16 0  | 5 NOT NAMED | 31.2 | 69.0 | 80 | 0   |
| 1906 | 9 16 6  | 5 NOT NAMED | 31.5 | 69.7 | 80 | 0   |
| 1906 | 9 16 12 | 5 NOT NAMED | 31.7 | 70.7 | 80 | 0   |
| 1906 | 9 16 18 | 5 NOT NAMED | 32.0 | 72.0 | 80 | 0   |
| 1906 | 9 17 0  | 5 NOT NAMED | 32.0 | 73.4 | 80 | 0   |
| 1906 | 9 17 6  | 5 NOT NAMED | 32.1 | 75.1 | 80 | 0   |
| 1906 | 9 17 12 | 5 NOT NAMED | 32.3 | 76.7 | 80 | 0   |
| 1906 | 9 17 18 | 5 NOT NAMED | 32.9 | 78.2 | 80 | 977 |
| 1906 | 9 18 0  | 5 NOT NAMED | 33.5 | 79.8 | 60 | 0   |
| 1906 | 9 18 6  | 5 NOT NAMED | 34.3 | 81.5 | 40 | 0   |
| 1906 | 9 18 12 | 5 NOT NAMED | 35.0 | 83.0 | 30 | 0   |
| 1906 | 9 18 18 | 5 NOT NAMED | 35.5 | 84.5 | 30 | 0   |
| 1906 | 9 19 12 | 6 NOT NAMED | 12.0 | 77.0 | 30 | 0   |
| 1906 | 9 19 18 | 6 NOT NAMED | 12.1 | 77.5 | 30 | 0   |
| 1906 | 9 20 0  | 6 NOT NAMED | 12.2 | 77.9 | 35 | 0   |
| 1906 | 9 20 6  | 6 NOT NAMED | 12.3 | 78.3 | 35 | 0   |
| 1906 | 9 20 12 | 6 NOT NAMED | 12.5 | 78.7 | 35 | 0   |
| 1906 | 9 20 18 | 6 NOT NAMED | 12.8 | 79.2 | 35 | 0   |
| 1906 | 9 21 0  | 6 NOT NAMED | 13.2 | 79.7 | 35 | 0   |
| 1906 | 9 21 6  | 6 NOT NAMED | 13.6 | 80.1 | 35 | 0   |
| 1906 | 9 21 12 | 6 NOT NAMED | 14.0 | 80.5 | 35 | 0   |
| 1906 | 9 21 18 | 6 NOT NAMED | 14.6 | 80.9 | 35 | 0   |
| 1906 | 9 22 0  | 6 NOT NAMED | 15.2 | 81.3 | 40 | 0   |
| 1906 | 9 22 6  | 6 NOT NAMED | 15.8 | 81.8 | 40 | 0   |
| 1906 | 9 22 12 | 6 NOT NAMED | 16.3 | 82.3 | 45 | 0   |
| 1906 | 9 22 18 | 6 NOT NAMED | 16.9 | 82.8 | 45 | 0   |
| 1906 | 9 23 0  | 6 NOT NAMED | 17.5 | 83.2 | 50 | 0   |
| 1906 | 9 23 6  | 6 NOT NAMED | 18.1 | 83.7 | 50 | 0   |
| 1906 | 9 23 12 | 6 NOT NAMED | 18.7 | 84.0 | 55 | 0   |
| 1906 | 9 23 18 | 6 NOT NAMED | 19.3 | 84.3 | 60 | 0   |
| 1906 | 9 24 0  | 6 NOT NAMED | 20.0 | 84.6 | 65 | 0   |

|      |         |   |             |      |      |     |     |
|------|---------|---|-------------|------|------|-----|-----|
| 1906 | 9 24    | 6 | 6 NOT NAMED | 20.6 | 84.8 | 70  | 0   |
| 1906 | 9 24 12 | 6 | 6 NOT NAMED | 21.4 | 85.1 | 75  | 0   |
| 1906 | 9 24 18 | 6 | 6 NOT NAMED | 21.9 | 85.2 | 80  | 0   |
| 1906 | 9 25    | 0 | 6 NOT NAMED | 22.3 | 85.5 | 85  | 0   |
| 1906 | 9 25    | 6 | 6 NOT NAMED | 22.8 | 85.7 | 90  | 0   |
| 1906 | 9 25 12 | 6 | 6 NOT NAMED | 23.3 | 86.0 | 95  | 0   |
| 1906 | 9 25 18 | 6 | 6 NOT NAMED | 24.0 | 86.3 | 100 | 0   |
| 1906 | 9 26    | 0 | 6 NOT NAMED | 24.7 | 86.6 | 105 | 0   |
| 1906 | 9 26    | 6 | 6 NOT NAMED | 25.5 | 86.8 | 105 | 0   |
| 1906 | 9 26 12 | 6 | 6 NOT NAMED | 26.3 | 87.0 | 105 | 953 |
| 1906 | 9 26 18 | 6 | 6 NOT NAMED | 27.3 | 87.4 | 100 | 0   |
| 1906 | 9 27    | 0 | 6 NOT NAMED | 28.4 | 87.9 | 100 | 0   |
| 1906 | 9 27    | 6 | 6 NOT NAMED | 29.4 | 88.4 | 95  | 0   |
| 1906 | 9 27 12 | 6 | 6 NOT NAMED | 30.4 | 88.7 | 95  | 958 |
| 1906 | 9 27 18 | 6 | 6 NOT NAMED | 31.4 | 89.0 | 65  | 0   |
| 1906 | 9 28    | 0 | 6 NOT NAMED | 32.4 | 89.3 | 50  | 0   |
| 1906 | 9 28    | 6 | 6 NOT NAMED | 33.6 | 89.6 | 40  | 0   |
| 1906 | 9 28 12 | 6 | 6 NOT NAMED | 34.7 | 89.9 | 40  | 0   |
| 1906 | 9 28 18 | 6 | 6 NOT NAMED | 35.6 | 90.2 | 35  | 0   |
| 1906 | 9 29    | 0 | 6 NOT NAMED | 36.6 | 90.4 | 35  | 0   |
| 1906 | 9 29    | 6 | 6 NOT NAMED | 37.3 | 90.5 | 30  | 0   |
| 1906 | 9 29 12 | 6 | 6 NOT NAMED | 38.0 | 90.3 | 30  | 0   |
| 1906 | 9 29 18 | 6 | 6 NOT NAMED | 38.2 | 89.4 | 30  | 0   |
| 1906 | 9 30    | 0 | 6 NOT NAMED | 38.0 | 88.4 | 30  | 0   |
| 1906 | 9 30    | 6 | 6 NOT NAMED | 37.3 | 87.5 | 30  | 0   |
| 1906 | 9 22    | 0 | 7 NOT NAMED | 30.3 | 31.9 | 50  | 0   |
| 1906 | 9 22    | 6 | 7 NOT NAMED | 29.6 | 32.9 | 50  | 0   |
| 1906 | 9 22 12 | 7 | 7 NOT NAMED | 29.0 | 33.8 | 50  | 0   |
| 1906 | 9 22 18 | 7 | 7 NOT NAMED | 28.3 | 34.7 | 50  | 0   |
| 1906 | 9 23    | 0 | 7 NOT NAMED | 27.7 | 35.6 | 55  | 0   |
| 1906 | 9 23    | 6 | 7 NOT NAMED | 27.3 | 36.4 | 55  | 0   |
| 1906 | 9 23 12 | 7 | 7 NOT NAMED | 26.9 | 37.1 | 60  | 0   |
| 1906 | 9 23 18 | 7 | 7 NOT NAMED | 26.6 | 37.8 | 60  | 0   |
| 1906 | 9 24    | 0 | 7 NOT NAMED | 26.3 | 38.5 | 60  | 0   |
| 1906 | 9 24    | 6 | 7 NOT NAMED | 26.1 | 39.2 | 60  | 0   |
| 1906 | 9 24 12 | 7 | 7 NOT NAMED | 26.0 | 40.0 | 60  | 0   |
| 1906 | 9 24 18 | 7 | 7 NOT NAMED | 25.8 | 40.7 | 60  | 0   |
| 1906 | 9 25    | 0 | 7 NOT NAMED | 25.7 | 41.5 | 60  | 0   |
| 1906 | 9 25    | 6 | 7 NOT NAMED | 25.7 | 42.2 | 60  | 0   |
| 1906 | 9 25 12 | 7 | 7 NOT NAMED | 25.7 | 43.0 | 60  | 0   |
| 1906 | 9 25 18 | 7 | 7 NOT NAMED | 25.7 | 43.7 | 60  | 0   |
| 1906 | 9 26    | 0 | 7 NOT NAMED | 26.0 | 44.3 | 60  | 0   |
| 1906 | 9 26    | 6 | 7 NOT NAMED | 26.4 | 44.6 | 60  | 0   |
| 1906 | 9 26 12 | 7 | 7 NOT NAMED | 27.0 | 44.7 | 60  | 0   |



|      |    |    |    |             |      |      |     |   |
|------|----|----|----|-------------|------|------|-----|---|
| 1906 | 9  | 26 | 18 | 7 NOT NAMED | 27.5 | 44.7 | 60  | 0 |
| 1906 | 9  | 27 | 0  | 7 NOT NAMED | 27.9 | 44.4 | 60  | 0 |
| 1906 | 9  | 27 | 6  | 7 NOT NAMED | 28.2 | 44.0 | 60  | 0 |
| 1906 | 9  | 27 | 12 | 7 NOT NAMED | 28.6 | 43.3 | 60  | 0 |
| 1906 | 9  | 27 | 18 | 7 NOT NAMED | 29.2 | 42.3 | 60  | 0 |
| 1906 | 9  | 28 | 0  | 7 NOT NAMED | 29.9 | 41.0 | 60  | 0 |
| 1906 | 9  | 28 | 6  | 7 NOT NAMED | 30.5 | 39.7 | 60  | 0 |
| 1906 | 9  | 28 | 12 | 7 NOT NAMED | 31.0 | 38.5 | 60  | 0 |
| 1906 | 9  | 28 | 18 | 7 NOT NAMED | 31.7 | 37.0 | 60  | 0 |
| 1906 | 9  | 29 | 0  | 7 NOT NAMED | 32.4 | 35.4 | 60  | 0 |
| 1906 | 9  | 29 | 6  | 7 NOT NAMED | 33.1 | 33.7 | 60  | 0 |
| 1906 | 9  | 29 | 12 | 7 NOT NAMED | 33.9 | 32.2 | 60  | 0 |
| 1906 | 9  | 29 | 18 | 7 NOT NAMED | 34.7 | 30.8 | 60  | 0 |
| 1906 | 9  | 30 | 0  | 7 NOT NAMED | 35.8 | 29.6 | 60  | 0 |
| 1906 | 9  | 30 | 6  | 7 NOT NAMED | 36.7 | 28.7 | 55  | 0 |
| 1906 | 9  | 30 | 12 | 7 NOT NAMED | 37.7 | 27.7 | 50  | 0 |
| 1906 | 9  | 30 | 18 | 7 NOT NAMED | 39.2 | 26.3 | 45  | 0 |
| 1906 | 10 | 1  | 0  | 7 NOT NAMED | 40.8 | 24.4 | 40  | 0 |
| 1906 | 10 | 1  | 6  | 7 NOT NAMED | 42.1 | 22.5 | 35  | 0 |
| 1906 | 10 | 1  | 12 | 7 NOT NAMED | 43.3 | 20.5 | 35  | 0 |
| 1906 | 10 | 1  | 18 | 7 NOT NAMED | 44.8 | 18.0 | 35  | 0 |
| 1906 | 10 | 2  | 0  | 7 NOT NAMED | 46.5 | 15.0 | 30  | 0 |
| 1906 | 10 | 2  | 6  | 7 NOT NAMED | 48.5 | 11.2 | 30  | 0 |
| 1906 | 10 | 2  | 12 | 7 NOT NAMED | 50.0 | 8.0  | 30  | 0 |
| 1906 | 10 | 2  | 18 | 7 NOT NAMED | 51.5 | 4.7  | 30  | 0 |
| 1906 | 10 | 8  | 6  | 8 NOT NAMED | 11.3 | 76.4 | 35  | 0 |
| 1906 | 10 | 8  | 12 | 8 NOT NAMED | 11.3 | 77.3 | 35  | 0 |
| 1906 | 10 | 8  | 18 | 8 NOT NAMED | 11.3 | 78.3 | 50  | 0 |
| 1906 | 10 | 9  | 0  | 8 NOT NAMED | 11.3 | 79.3 | 65  | 0 |
| 1906 | 10 | 9  | 6  | 8 NOT NAMED | 11.3 | 80.4 | 75  | 0 |
| 1906 | 10 | 9  | 12 | 8 NOT NAMED | 11.5 | 81.5 | 85  | 0 |
| 1906 | 10 | 9  | 18 | 8 NOT NAMED | 11.7 | 82.4 | 95  | 0 |
| 1906 | 10 | 10 | 0  | 8 NOT NAMED | 12.1 | 83.1 | 105 | 0 |
| 1906 | 10 | 10 | 6  | 8 NOT NAMED | 12.6 | 83.9 | 80  | 0 |
| 1906 | 10 | 10 | 12 | 8 NOT NAMED | 13.0 | 84.6 | 70  | 0 |
| 1906 | 10 | 10 | 18 | 8 NOT NAMED | 13.2 | 85.1 | 65  | 0 |
| 1906 | 10 | 11 | 0  | 8 NOT NAMED | 13.4 | 85.5 | 60  | 0 |
| 1906 | 10 | 11 | 6  | 8 NOT NAMED | 13.7 | 85.9 | 55  | 0 |
| 1906 | 10 | 11 | 12 | 8 NOT NAMED | 14.0 | 86.3 | 50  | 0 |
| 1906 | 10 | 11 | 18 | 8 NOT NAMED | 14.4 | 86.7 | 45  | 0 |
| 1906 | 10 | 12 | 0  | 8 NOT NAMED | 14.7 | 86.9 | 40  | 0 |
| 1906 | 10 | 12 | 6  | 8 NOT NAMED | 15.1 | 87.1 | 40  | 0 |
| 1906 | 10 | 12 | 12 | 8 NOT NAMED | 15.5 | 87.3 | 50  | 0 |
| 1906 | 10 | 12 | 18 | 8 NOT NAMED | 15.8 | 87.4 | 65  | 0 |

|            |    |             |      |      |     |     |
|------------|----|-------------|------|------|-----|-----|
| 1906 10 13 | 0  | 8 NOT NAMED | 16.1 | 87.6 | 65  | 0   |
| 1906 10 13 | 6  | 8 NOT NAMED | 16.4 | 87.8 | 70  | 0   |
| 1906 10 13 | 12 | 8 NOT NAMED | 16.7 | 88.0 | 75  | 0   |
| 1906 10 13 | 18 | 8 NOT NAMED | 16.9 | 88.1 | 80  | 0   |
| 1906 10 14 | 0  | 8 NOT NAMED | 17.1 | 88.2 | 70  | 0   |
| 1906 10 14 | 6  | 8 NOT NAMED | 17.4 | 88.3 | 65  | 0   |
| 1906 10 14 | 12 | 8 NOT NAMED | 17.7 | 88.3 | 60  | 0   |
| 1906 10 14 | 18 | 8 NOT NAMED | 17.9 | 88.3 | 55  | 0   |
| 1906 10 15 | 0  | 8 NOT NAMED | 18.1 | 88.2 | 50  | 0   |
| 1906 10 15 | 6  | 8 NOT NAMED | 18.3 | 88.1 | 50  | 0   |
| 1906 10 15 | 12 | 8 NOT NAMED | 18.5 | 88.0 | 50  | 0   |
| 1906 10 15 | 18 | 8 NOT NAMED | 18.8 | 87.8 | 50  | 0   |
| 1906 10 16 | 0  | 8 NOT NAMED | 19.1 | 87.6 | 50  | 0   |
| 1906 10 16 | 6  | 8 NOT NAMED | 19.3 | 87.3 | 60  | 0   |
| 1906 10 16 | 12 | 8 NOT NAMED | 19.5 | 87.0 | 70  | 0   |
| 1906 10 16 | 18 | 8 NOT NAMED | 19.8 | 86.3 | 80  | 0   |
| 1906 10 17 | 0  | 8 NOT NAMED | 20.0 | 85.7 | 90  | 0   |
| 1906 10 17 | 6  | 8 NOT NAMED | 20.3 | 85.1 | 100 | 0   |
| 1906 10 17 | 12 | 8 NOT NAMED | 20.7 | 84.0 | 105 | 0   |
| 1906 10 17 | 18 | 8 NOT NAMED | 21.5 | 82.7 | 105 | 0   |
| 1906 10 18 | 0  | 8 NOT NAMED | 22.6 | 82.1 | 105 | 0   |
| 1906 10 18 | 6  | 8 NOT NAMED | 23.9 | 81.6 | 105 | 0   |
| 1906 10 18 | 12 | 8 NOT NAMED | 25.3 | 80.7 | 105 | 953 |
| 1906 10 18 | 18 | 8 NOT NAMED | 26.6 | 79.5 | 95  | 0   |
| 1906 10 19 | 0  | 8 NOT NAMED | 27.9 | 78.6 | 90  | 0   |
| 1906 10 19 | 6  | 8 NOT NAMED | 29.0 | 78.1 | 85  | 0   |
| 1906 10 19 | 12 | 8 NOT NAMED | 30.0 | 78.0 | 80  | 0   |
| 1906 10 19 | 18 | 8 NOT NAMED | 30.5 | 78.0 | 80  | 0   |
| 1906 10 20 | 0  | 8 NOT NAMED | 30.9 | 78.0 | 75  | 0   |
| 1906 10 20 | 6  | 8 NOT NAMED | 31.4 | 78.1 | 75  | 0   |
| 1906 10 20 | 12 | 8 NOT NAMED | 31.7 | 78.3 | 70  | 0   |
| 1906 10 20 | 18 | 8 NOT NAMED | 32.1 | 79.3 | 70  | 0   |
| 1906 10 21 | 0  | 8 NOT NAMED | 31.7 | 80.4 | 60  | 0   |
| 1906 10 21 | 6  | 8 NOT NAMED | 30.7 | 81.2 | 50  | 0   |
| 1906 10 21 | 12 | 8 NOT NAMED | 29.5 | 81.5 | 40  | 0   |
| 1906 10 21 | 18 | 8 NOT NAMED | 29.0 | 81.5 | 35  | 0   |
| 1906 10 22 | 0  | 8 NOT NAMED | 28.3 | 81.6 | 30  | 0   |
| 1906 10 22 | 6  | 8 NOT NAMED | 27.3 | 81.7 | 30  | 0   |
| 1906 10 22 | 12 | 8 NOT NAMED | 26.0 | 82.0 | 25  | 0   |
| 1906 10 22 | 18 | 8 NOT NAMED | 24.9 | 82.8 | 25  | 0   |
| 1906 10 23 | 0  | 8 NOT NAMED | 24.0 | 83.8 | 25  | 0   |
| 1906 10 23 | 6  | 8 NOT NAMED | 23.1 | 84.8 | 25  | 0   |
| 1906 10 23 | 12 | 8 NOT NAMED | 22.3 | 85.7 | 25  | 0   |
| 1906 10 23 | 18 | 8 NOT NAMED | 21.5 | 86.6 | 25  | 0   |

|      |    |    |    |    |           |      |      |    |   |
|------|----|----|----|----|-----------|------|------|----|---|
| 1906 | 10 | 14 | 6  | 9  | NOT NAMED | 33.7 | 62.0 | 35 | 0 |
| 1906 | 10 | 14 | 12 | 9  | NOT NAMED | 33.7 | 63.5 | 35 | 0 |
| 1906 | 10 | 14 | 18 | 9  | NOT NAMED | 33.7 | 65.1 | 35 | 0 |
| 1906 | 10 | 15 | 0  | 9  | NOT NAMED | 33.6 | 66.9 | 40 | 0 |
| 1906 | 10 | 15 | 6  | 9  | NOT NAMED | 33.4 | 68.2 | 40 | 0 |
| 1906 | 10 | 15 | 12 | 9  | NOT NAMED | 33.2 | 69.7 | 45 | 0 |
| 1906 | 10 | 15 | 18 | 9  | NOT NAMED | 32.7 | 71.4 | 45 | 0 |
| 1906 | 10 | 16 | 0  | 9  | NOT NAMED | 32.1 | 73.1 | 45 | 0 |
| 1906 | 10 | 16 | 6  | 9  | NOT NAMED | 31.2 | 74.9 | 45 | 0 |
| 1906 | 10 | 16 | 12 | 9  | NOT NAMED | 30.5 | 76.5 | 45 | 0 |
| 1906 | 10 | 16 | 18 | 9  | NOT NAMED | 30.1 | 77.3 | 40 | 0 |
| 1906 | 10 | 17 | 0  | 9  | NOT NAMED | 29.9 | 78.0 | 40 | 0 |
| 1906 | 10 | 17 | 6  | 9  | NOT NAMED | 29.6 | 78.7 | 35 | 0 |
| 1906 | 10 | 17 | 12 | 9  | NOT NAMED | 29.3 | 79.5 | 30 | 0 |
| 1906 | 10 | 17 | 18 | 9  | NOT NAMED | 28.8 | 80.6 | 25 | 0 |
| 1906 | 10 | 15 | 6  | 10 | NOT NAMED | 21.0 | 69.4 | 35 | 0 |
| 1906 | 10 | 15 | 12 | 10 | NOT NAMED | 21.7 | 70.0 | 35 | 0 |
| 1906 | 10 | 15 | 18 | 10 | NOT NAMED | 22.7 | 70.7 | 35 | 0 |
| 1906 | 10 | 16 | 0  | 10 | NOT NAMED | 23.9 | 71.3 | 35 | 0 |
| 1906 | 10 | 16 | 6  | 10 | NOT NAMED | 25.2 | 71.6 | 35 | 0 |
| 1906 | 10 | 16 | 12 | 10 | NOT NAMED | 26.2 | 71.3 | 35 | 0 |
| 1906 | 10 | 16 | 18 | 10 | NOT NAMED | 27.1 | 71.0 | 35 | 0 |
| 1906 | 10 | 17 | 0  | 10 | NOT NAMED | 27.8 | 70.4 | 35 | 0 |
| 1906 | 10 | 17 | 6  | 10 | NOT NAMED | 28.2 | 69.8 | 35 | 0 |
| 1906 | 10 | 17 | 12 | 10 | NOT NAMED | 28.5 | 69.3 | 35 | 0 |
| 1906 | 10 | 17 | 18 | 10 | NOT NAMED | 28.8 | 68.5 | 35 | 0 |
| 1906 | 10 | 18 | 0  | 10 | NOT NAMED | 29.0 | 67.7 | 40 | 0 |
| 1906 | 10 | 18 | 6  | 10 | NOT NAMED | 29.2 | 66.9 | 40 | 0 |
| 1906 | 10 | 18 | 12 | 10 | NOT NAMED | 29.3 | 66.0 | 45 | 0 |
| 1906 | 10 | 18 | 18 | 10 | NOT NAMED | 29.3 | 65.0 | 45 | 0 |
| 1906 | 10 | 19 | 0  | 10 | NOT NAMED | 29.3 | 64.0 | 40 | 0 |
| 1906 | 10 | 19 | 6  | 10 | NOT NAMED | 29.3 | 63.0 | 40 | 0 |
| 1906 | 10 | 19 | 12 | 10 | NOT NAMED | 29.3 | 62.0 | 35 | 0 |
| 1906 | 10 | 19 | 18 | 10 | NOT NAMED | 29.3 | 61.0 | 35 | 0 |
| 1906 | 10 | 20 | 0  | 10 | NOT NAMED | 29.2 | 60.0 | 30 | 0 |
| 1906 | 10 | 20 | 6  | 10 | NOT NAMED | 29.1 | 59.0 | 30 | 0 |
| 1906 | 10 | 20 | 12 | 10 | NOT NAMED | 29.0 | 58.0 | 25 | 0 |
| 1906 | 10 | 20 | 18 | 10 | NOT NAMED | 28.9 | 57.1 | 25 | 0 |
| 1906 | 11 | 5  | 0  | 11 | NOT NAMED | 18.5 | 82.5 | 30 | 0 |
| 1906 | 11 | 5  | 6  | 11 | NOT NAMED | 19.0 | 82.5 | 30 | 0 |
| 1906 | 11 | 5  | 12 | 11 | NOT NAMED | 19.5 | 82.5 | 35 | 0 |
| 1906 | 11 | 5  | 18 | 11 | NOT NAMED | 19.9 | 82.4 | 40 | 0 |
| 1906 | 11 | 6  | 0  | 11 | NOT NAMED | 20.3 | 82.1 | 45 | 0 |
| 1906 | 11 | 6  | 6  | 11 | NOT NAMED | 20.7 | 81.8 | 50 | 0 |

|      |    |    |    |    |           |      |      |    |   |
|------|----|----|----|----|-----------|------|------|----|---|
| 1906 | 11 | 6  | 12 | 11 | NOT NAMED | 21.0 | 81.5 | 55 | 0 |
| 1906 | 11 | 6  | 18 | 11 | NOT NAMED | 21.3 | 81.0 | 60 | 0 |
| 1906 | 11 | 7  | 0  | 11 | NOT NAMED | 21.5 | 80.5 | 65 | 0 |
| 1906 | 11 | 7  | 6  | 11 | NOT NAMED | 21.7 | 80.0 | 70 | 0 |
| 1906 | 11 | 7  | 12 | 11 | NOT NAMED | 22.0 | 79.3 | 60 | 0 |
| 1906 | 11 | 7  | 18 | 11 | NOT NAMED | 22.4 | 78.4 | 50 | 0 |
| 1906 | 11 | 8  | 0  | 11 | NOT NAMED | 22.7 | 77.6 | 45 | 0 |
| 1906 | 11 | 8  | 6  | 11 | NOT NAMED | 23.0 | 76.6 | 40 | 0 |
| 1906 | 11 | 8  | 12 | 11 | NOT NAMED | 23.3 | 75.7 | 35 | 0 |
| 1906 | 11 | 8  | 18 | 11 | NOT NAMED | 23.6 | 74.8 | 35 | 0 |
| 1906 | 11 | 9  | 0  | 11 | NOT NAMED | 23.9 | 73.9 | 35 | 0 |
| 1906 | 11 | 9  | 6  | 11 | NOT NAMED | 24.2 | 73.0 | 35 | 0 |
| 1906 | 11 | 9  | 12 | 11 | NOT NAMED | 24.5 | 72.3 | 35 | 0 |
| 1906 | 11 | 9  | 18 | 11 | NOT NAMED | 24.8 | 71.5 | 35 | 0 |
| 1906 | 11 | 10 | 0  | 11 | NOT NAMED | 25.1 | 70.5 | 30 | 0 |
| 1906 | 11 | 10 | 6  | 11 | NOT NAMED | 25.5 | 69.5 | 30 | 0 |
| 1907 | 6  | 24 | 12 | 1  | NOT NAMED | 16.0 | 78.0 | 35 | 0 |
| 1907 | 6  | 24 | 18 | 1  | NOT NAMED | 16.1 | 78.8 | 35 | 0 |
| 1907 | 6  | 25 | 0  | 1  | NOT NAMED | 16.4 | 79.7 | 35 | 0 |
| 1907 | 6  | 25 | 6  | 1  | NOT NAMED | 16.7 | 80.6 | 35 | 0 |
| 1907 | 6  | 25 | 12 | 1  | NOT NAMED | 17.0 | 81.5 | 35 | 0 |
| 1907 | 6  | 25 | 18 | 1  | NOT NAMED | 17.7 | 82.4 | 35 | 0 |
| 1907 | 6  | 26 | 0  | 1  | NOT NAMED | 18.6 | 83.4 | 35 | 0 |
| 1907 | 6  | 26 | 6  | 1  | NOT NAMED | 19.6 | 84.3 | 35 | 0 |
| 1907 | 6  | 26 | 12 | 1  | NOT NAMED | 20.6 | 85.3 | 40 | 0 |
| 1907 | 6  | 26 | 18 | 1  | NOT NAMED | 21.8 | 86.2 | 40 | 0 |
| 1907 | 6  | 27 | 0  | 1  | NOT NAMED | 22.9 | 87.1 | 45 | 0 |
| 1907 | 6  | 27 | 6  | 1  | NOT NAMED | 24.0 | 88.0 | 45 | 0 |
| 1907 | 6  | 27 | 12 | 1  | NOT NAMED | 25.2 | 88.9 | 45 | 0 |
| 1907 | 6  | 27 | 18 | 1  | NOT NAMED | 26.2 | 89.4 | 45 | 0 |
| 1907 | 6  | 28 | 0  | 1  | NOT NAMED | 27.0 | 89.6 | 45 | 0 |
| 1907 | 6  | 28 | 6  | 1  | NOT NAMED | 27.6 | 89.4 | 45 | 0 |
| 1907 | 6  | 28 | 12 | 1  | NOT NAMED | 28.3 | 89.0 | 50 | 0 |
| 1907 | 6  | 28 | 18 | 1  | NOT NAMED | 29.3 | 87.8 | 50 | 0 |
| 1907 | 6  | 29 | 0  | 1  | NOT NAMED | 30.3 | 85.8 | 50 | 0 |
| 1907 | 6  | 29 | 6  | 1  | NOT NAMED | 30.8 | 83.5 | 45 | 0 |
| 1907 | 6  | 29 | 12 | 1  | NOT NAMED | 31.8 | 80.8 | 55 | 0 |
| 1907 | 6  | 29 | 18 | 1  | NOT NAMED | 34.0 | 78.0 | 50 | 0 |
| 1907 | 6  | 30 | 0  | 1  | NOT NAMED | 36.5 | 76.0 | 45 | 0 |
| 1907 | 6  | 30 | 6  | 1  | NOT NAMED | 39.2 | 73.3 | 40 | 0 |
| 1907 | 6  | 30 | 12 | 1  | NOT NAMED | 42.0 | 70.5 | 35 | 0 |
| 1907 | 6  | 30 | 18 | 1  | NOT NAMED | 45.0 | 67.5 | 30 | 0 |
| 1907 | 9  | 18 | 12 | 2  | NOT NAMED | 25.0 | 79.0 | 30 | 0 |
| 1907 | 9  | 18 | 18 | 2  | NOT NAMED | 25.5 | 80.3 | 30 | 0 |

|      |       |    |             |      |      |    |   |
|------|-------|----|-------------|------|------|----|---|
| 1907 | 9 19  | 0  | 2 NOT NAMED | 25.9 | 81.6 | 30 | 0 |
| 1907 | 9 19  | 6  | 2 NOT NAMED | 26.3 | 82.8 | 35 | 0 |
| 1907 | 9 19  | 12 | 2 NOT NAMED | 26.7 | 84.0 | 35 | 0 |
| 1907 | 9 19  | 18 | 2 NOT NAMED | 27.1 | 85.0 | 35 | 0 |
| 1907 | 9 20  | 0  | 2 NOT NAMED | 27.5 | 85.8 | 40 | 0 |
| 1907 | 9 20  | 6  | 2 NOT NAMED | 27.9 | 86.4 | 40 | 0 |
| 1907 | 9 20  | 12 | 2 NOT NAMED | 28.3 | 87.0 | 40 | 0 |
| 1907 | 9 20  | 18 | 2 NOT NAMED | 28.7 | 87.6 | 40 | 0 |
| 1907 | 9 21  | 0  | 2 NOT NAMED | 29.1 | 88.2 | 40 | 0 |
| 1907 | 9 21  | 6  | 2 NOT NAMED | 29.5 | 88.7 | 40 | 0 |
| 1907 | 9 21  | 12 | 2 NOT NAMED | 30.0 | 89.0 | 40 | 0 |
| 1907 | 9 21  | 18 | 2 NOT NAMED | 30.5 | 88.9 | 35 | 0 |
| 1907 | 9 22  | 0  | 2 NOT NAMED | 31.0 | 88.8 | 35 | 0 |
| 1907 | 9 22  | 6  | 2 NOT NAMED | 31.5 | 88.4 | 35 | 0 |
| 1907 | 9 22  | 12 | 2 NOT NAMED | 32.1 | 87.6 | 35 | 0 |
| 1907 | 9 22  | 18 | 2 NOT NAMED | 32.9 | 86.3 | 35 | 0 |
| 1907 | 9 23  | 0  | 2 NOT NAMED | 33.8 | 84.7 | 35 | 0 |
| 1907 | 9 23  | 6  | 2 NOT NAMED | 34.7 | 83.0 | 35 | 0 |
| 1907 | 9 23  | 12 | 2 NOT NAMED | 35.7 | 81.3 | 35 | 0 |
| 1907 | 9 23  | 18 | 2 NOT NAMED | 36.8 | 79.6 | 30 | 0 |
| 1907 | 9 27  | 6  | 3 NOT NAMED | 22.3 | 94.1 | 35 | 0 |
| 1907 | 9 27  | 12 | 3 NOT NAMED | 23.3 | 93.3 | 35 | 0 |
| 1907 | 9 27  | 18 | 3 NOT NAMED | 24.5 | 92.5 | 35 | 0 |
| 1907 | 9 28  | 0  | 3 NOT NAMED | 25.7 | 91.3 | 35 | 0 |
| 1907 | 9 28  | 6  | 3 NOT NAMED | 27.0 | 90.0 | 35 | 0 |
| 1907 | 9 28  | 12 | 3 NOT NAMED | 28.3 | 88.5 | 40 | 0 |
| 1907 | 9 28  | 18 | 3 NOT NAMED | 29.6 | 86.6 | 45 | 0 |
| 1907 | 9 29  | 0  | 3 NOT NAMED | 30.9 | 84.3 | 40 | 0 |
| 1907 | 9 29  | 6  | 3 NOT NAMED | 31.8 | 81.9 | 35 | 0 |
| 1907 | 9 29  | 12 | 3 NOT NAMED | 32.7 | 79.0 | 35 | 0 |
| 1907 | 9 29  | 18 | 3 NOT NAMED | 34.0 | 75.5 | 30 | 0 |
| 1907 | 9 30  | 0  | 3 NOT NAMED | 35.5 | 71.5 | 30 | 0 |
| 1907 | 10 17 | 6  | 4 NOT NAMED | 26.3 | 67.4 | 45 | 0 |
| 1907 | 10 17 | 12 | 4 NOT NAMED | 26.4 | 66.0 | 45 | 0 |
| 1907 | 10 17 | 18 | 4 NOT NAMED | 26.8 | 64.6 | 45 | 0 |
| 1907 | 10 18 | 0  | 4 NOT NAMED | 27.5 | 63.2 | 45 | 0 |
| 1907 | 10 18 | 6  | 4 NOT NAMED | 28.3 | 61.8 | 45 | 0 |
| 1907 | 10 18 | 12 | 4 NOT NAMED | 29.0 | 60.5 | 45 | 0 |
| 1907 | 10 18 | 18 | 4 NOT NAMED | 30.4 | 59.4 | 45 | 0 |
| 1907 | 10 19 | 0  | 4 NOT NAMED | 31.7 | 58.2 | 45 | 0 |
| 1907 | 10 19 | 6  | 4 NOT NAMED | 32.8 | 57.3 | 45 | 0 |
| 1907 | 10 19 | 12 | 4 NOT NAMED | 34.0 | 56.0 | 45 | 0 |
| 1907 | 10 19 | 18 | 4 NOT NAMED | 35.6 | 54.0 | 40 | 0 |
| 1907 | 10 20 | 0  | 4 NOT NAMED | 37.6 | 49.1 | 40 | 0 |

|      |    |    |    |             |      |      |    |   |
|------|----|----|----|-------------|------|------|----|---|
| 1907 | 11 | 6  | 0  | 5 NOT NAMED | 31.5 | 39.7 | 35 | 0 |
| 1907 | 11 | 6  | 6  | 5 NOT NAMED | 30.8 | 39.9 | 35 | 0 |
| 1907 | 11 | 6  | 12 | 5 NOT NAMED | 30.0 | 40.0 | 35 | 0 |
| 1907 | 11 | 6  | 18 | 5 NOT NAMED | 29.5 | 40.1 | 35 | 0 |
| 1907 | 11 | 7  | 0  | 5 NOT NAMED | 28.9 | 40.2 | 35 | 0 |
| 1907 | 11 | 7  | 6  | 5 NOT NAMED | 28.2 | 40.3 | 35 | 0 |
| 1907 | 11 | 7  | 12 | 5 NOT NAMED | 27.5 | 40.5 | 35 | 0 |
| 1907 | 11 | 7  | 18 | 5 NOT NAMED | 27.2 | 40.9 | 35 | 0 |
| 1907 | 11 | 8  | 0  | 5 NOT NAMED | 26.9 | 41.4 | 40 | 0 |
| 1907 | 11 | 8  | 6  | 5 NOT NAMED | 26.7 | 41.9 | 40 | 0 |
| 1907 | 11 | 8  | 12 | 5 NOT NAMED | 26.7 | 42.5 | 40 | 0 |
| 1907 | 11 | 8  | 18 | 5 NOT NAMED | 27.2 | 43.5 | 40 | 0 |
| 1907 | 11 | 9  | 0  | 5 NOT NAMED | 28.1 | 44.0 | 40 | 0 |
| 1907 | 11 | 9  | 6  | 5 NOT NAMED | 29.1 | 44.2 | 40 | 0 |
| 1907 | 11 | 9  | 12 | 5 NOT NAMED | 30.0 | 44.5 | 40 | 0 |
| 1907 | 11 | 9  | 18 | 5 NOT NAMED | 30.8 | 44.7 | 40 | 0 |
| 1907 | 11 | 10 | 0  | 5 NOT NAMED | 31.8 | 45.0 | 40 | 0 |
| 1907 | 11 | 10 | 6  | 5 NOT NAMED | 32.6 | 45.4 | 40 | 0 |
| 1907 | 11 | 10 | 12 | 5 NOT NAMED | 33.5 | 46.0 | 40 | 0 |
| 1907 | 11 | 10 | 18 | 5 NOT NAMED | 34.1 | 46.4 | 40 | 0 |
| 1907 | 11 | 11 | 0  | 5 NOT NAMED | 34.7 | 46.9 | 40 | 0 |
| 1907 | 11 | 11 | 6  | 5 NOT NAMED | 35.4 | 47.6 | 40 | 0 |
| 1907 | 11 | 11 | 12 | 5 NOT NAMED | 36.5 | 48.0 | 40 | 0 |
| 1907 | 11 | 11 | 18 | 5 NOT NAMED | 37.7 | 48.0 | 40 | 0 |
| 1907 | 11 | 12 | 0  | 5 NOT NAMED | 38.7 | 47.3 | 35 | 0 |
| 1907 | 11 | 12 | 6  | 5 NOT NAMED | 39.6 | 46.7 | 35 | 0 |
| 1907 | 11 | 12 | 12 | 5 NOT NAMED | 40.5 | 46.0 | 35 | 0 |
| 1907 | 11 | 12 | 18 | 5 NOT NAMED | 41.7 | 45.0 | 35 | 0 |
| 1908 | 3  | 6  | 12 | 1 NOT NAMED | 23.8 | 60.2 | 50 | 0 |
| 1908 | 3  | 6  | 18 | 1 NOT NAMED | 22.7 | 60.7 | 55 | 0 |
| 1908 | 3  | 7  | 0  | 1 NOT NAMED | 21.6 | 61.1 | 65 | 0 |
| 1908 | 3  | 7  | 6  | 1 NOT NAMED | 20.6 | 61.5 | 70 | 0 |
| 1908 | 3  | 7  | 12 | 1 NOT NAMED | 19.7 | 61.9 | 80 | 0 |
| 1908 | 3  | 7  | 18 | 1 NOT NAMED | 18.8 | 62.2 | 85 | 0 |
| 1908 | 3  | 8  | 0  | 1 NOT NAMED | 18.0 | 62.5 | 85 | 0 |
| 1908 | 3  | 8  | 6  | 1 NOT NAMED | 17.3 | 62.8 | 70 | 0 |
| 1908 | 3  | 8  | 12 | 1 NOT NAMED | 16.6 | 63.1 | 65 | 0 |
| 1908 | 3  | 8  | 18 | 1 NOT NAMED | 16.0 | 63.4 | 65 | 0 |
| 1908 | 3  | 9  | 0  | 1 NOT NAMED | 15.4 | 63.7 | 65 | 0 |
| 1908 | 3  | 9  | 6  | 1 NOT NAMED | 14.9 | 64.0 | 50 | 0 |
| 1908 | 3  | 9  | 12 | 1 NOT NAMED | 14.4 | 64.2 | 40 | 0 |
| 1908 | 3  | 9  | 18 | 1 NOT NAMED | 13.8 | 64.6 | 35 | 0 |
| 1908 | 5  | 24 | 12 | 2 NOT NAMED | 21.0 | 71.7 | 30 | 0 |
| 1908 | 5  | 24 | 18 | 2 NOT NAMED | 21.7 | 72.0 | 30 | 0 |

|      |      |    |             |      |      |    |     |
|------|------|----|-------------|------|------|----|-----|
| 1908 | 5 25 | 0  | 2 NOT NAMED | 22.4 | 72.3 | 30 | 0   |
| 1908 | 5 25 | 6  | 2 NOT NAMED | 23.3 | 72.8 | 30 | 0   |
| 1908 | 5 25 | 12 | 2 NOT NAMED | 24.0 | 73.5 | 30 | 0   |
| 1908 | 5 25 | 18 | 2 NOT NAMED | 24.7 | 74.3 | 30 | 0   |
| 1908 | 5 26 | 0  | 2 NOT NAMED | 25.4 | 75.0 | 35 | 0   |
| 1908 | 5 26 | 6  | 2 NOT NAMED | 26.0 | 75.6 | 35 | 0   |
| 1908 | 5 26 | 12 | 2 NOT NAMED | 26.7 | 76.3 | 35 | 0   |
| 1908 | 5 26 | 18 | 2 NOT NAMED | 27.2 | 77.3 | 35 | 0   |
| 1908 | 5 27 | 0  | 2 NOT NAMED | 27.7 | 78.1 | 40 | 0   |
| 1908 | 5 27 | 6  | 2 NOT NAMED | 28.5 | 79.1 | 45 | 0   |
| 1908 | 5 27 | 12 | 2 NOT NAMED | 29.5 | 79.5 | 50 | 0   |
| 1908 | 5 27 | 18 | 2 NOT NAMED | 30.1 | 79.5 | 55 | 0   |
| 1908 | 5 28 | 0  | 2 NOT NAMED | 30.6 | 79.2 | 60 | 0   |
| 1908 | 5 28 | 6  | 2 NOT NAMED | 31.2 | 78.8 | 65 | 0   |
| 1908 | 5 28 | 12 | 2 NOT NAMED | 31.7 | 78.3 | 65 | 0   |
| 1908 | 5 28 | 18 | 2 NOT NAMED | 32.3 | 77.9 | 65 | 0   |
| 1908 | 5 29 | 0  | 2 NOT NAMED | 32.8 | 77.4 | 65 | 0   |
| 1908 | 5 29 | 6  | 2 NOT NAMED | 33.4 | 77.0 | 65 | 0   |
| 1908 | 5 29 | 12 | 2 NOT NAMED | 34.0 | 76.5 | 65 | 0   |
| 1908 | 5 29 | 18 | 2 NOT NAMED | 34.8 | 75.8 | 65 | 989 |
| 1908 | 5 30 | 0  | 2 NOT NAMED | 35.6 | 75.1 | 65 | 0   |
| 1908 | 5 30 | 6  | 2 NOT NAMED | 36.3 | 74.6 | 60 | 0   |
| 1908 | 5 30 | 12 | 2 NOT NAMED | 37.3 | 74.0 | 50 | 0   |
| 1908 | 5 30 | 18 | 2 NOT NAMED | 39.4 | 73.0 | 40 | 0   |
| 1908 | 5 31 | 0  | 2 NOT NAMED | 41.8 | 71.7 | 35 | 0   |
| 1908 | 5 31 | 6  | 2 NOT NAMED | 43.8 | 70.3 | 35 | 0   |
| 1908 | 5 31 | 12 | 2 NOT NAMED | 45.5 | 69.0 | 35 | 0   |
| 1908 | 5 31 | 18 | 2 NOT NAMED | 46.4 | 68.3 | 35 | 0   |
| 1908 | 7 24 | 12 | 3 NOT NAMED | 27.5 | 75.0 | 30 | 0   |
| 1908 | 7 24 | 18 | 3 NOT NAMED | 27.8 | 75.2 | 30 | 0   |
| 1908 | 7 25 | 0  | 3 NOT NAMED | 28.1 | 75.5 | 30 | 0   |
| 1908 | 7 25 | 6  | 3 NOT NAMED | 28.4 | 75.9 | 30 | 0   |
| 1908 | 7 25 | 12 | 3 NOT NAMED | 28.7 | 76.3 | 35 | 0   |
| 1908 | 7 25 | 18 | 3 NOT NAMED | 28.9 | 76.6 | 35 | 0   |
| 1908 | 7 26 | 0  | 3 NOT NAMED | 29.0 | 76.9 | 35 | 0   |
| 1908 | 7 26 | 6  | 3 NOT NAMED | 29.0 | 77.2 | 35 | 0   |
| 1908 | 7 26 | 12 | 3 NOT NAMED | 29.0 | 77.5 | 35 | 0   |
| 1908 | 7 26 | 18 | 3 NOT NAMED | 28.9 | 77.8 | 35 | 0   |
| 1908 | 7 27 | 0  | 3 NOT NAMED | 28.7 | 78.0 | 35 | 0   |
| 1908 | 7 27 | 6  | 3 NOT NAMED | 28.3 | 78.3 | 35 | 0   |
| 1908 | 7 27 | 12 | 3 NOT NAMED | 27.7 | 78.5 | 35 | 0   |
| 1908 | 7 27 | 18 | 3 NOT NAMED | 27.3 | 78.3 | 35 | 0   |
| 1908 | 7 28 | 0  | 3 NOT NAMED | 27.1 | 77.7 | 40 | 0   |
| 1908 | 7 28 | 6  | 3 NOT NAMED | 27.1 | 77.2 | 55 | 0   |

|      |         |             |      |      |    |   |
|------|---------|-------------|------|------|----|---|
| 1908 | 7 28 12 | 3 NOT NAMED | 27.3 | 77.0 | 60 | 0 |
| 1908 | 7 28 18 | 3 NOT NAMED | 27.7 | 77.0 | 60 | 0 |
| 1908 | 7 29 0  | 3 NOT NAMED | 28.0 | 77.5 | 60 | 0 |
| 1908 | 7 29 6  | 3 NOT NAMED | 28.2 | 77.9 | 60 | 0 |
| 1908 | 7 29 12 | 3 NOT NAMED | 28.5 | 78.0 | 60 | 0 |
| 1908 | 7 29 18 | 3 NOT NAMED | 29.4 | 78.3 | 60 | 0 |
| 1908 | 7 30 0  | 3 NOT NAMED | 30.4 | 78.3 | 65 | 0 |
| 1908 | 7 30 6  | 3 NOT NAMED | 31.4 | 78.2 | 70 | 0 |
| 1908 | 7 30 12 | 3 NOT NAMED | 32.5 | 78.0 | 70 | 0 |
| 1908 | 7 30 18 | 3 NOT NAMED | 33.1 | 77.9 | 70 | 0 |
| 1908 | 7 31 0  | 3 NOT NAMED | 33.7 | 77.6 | 70 | 0 |
| 1908 | 7 31 6  | 3 NOT NAMED | 34.2 | 77.4 | 70 | 0 |
| 1908 | 7 31 12 | 3 NOT NAMED | 34.7 | 77.0 | 70 | 0 |
| 1908 | 7 31 18 | 3 NOT NAMED | 35.2 | 75.8 | 60 | 0 |
| 1908 | 8 1 0   | 3 NOT NAMED | 35.6 | 74.1 | 60 | 0 |
| 1908 | 8 1 6   | 3 NOT NAMED | 36.1 | 72.8 | 60 | 0 |
| 1908 | 8 1 12  | 3 NOT NAMED | 36.5 | 71.7 | 60 | 0 |
| 1908 | 8 1 18  | 3 NOT NAMED | 37.2 | 70.0 | 60 | 0 |
| 1908 | 8 2 0   | 3 NOT NAMED | 37.8 | 68.5 | 60 | 0 |
| 1908 | 8 2 6   | 3 NOT NAMED | 38.7 | 66.9 | 60 | 0 |
| 1908 | 8 2 12  | 3 NOT NAMED | 40.0 | 65.5 | 60 | 0 |
| 1908 | 8 2 18  | 3 NOT NAMED | 41.7 | 63.0 | 60 | 0 |
| 1908 | 8 3 0   | 3 NOT NAMED | 44.0 | 60.6 | 60 | 0 |
| 1908 | 8 3 6   | 3 NOT NAMED | 46.3 | 58.5 | 55 | 0 |
| 1908 | 8 3 12  | 3 NOT NAMED | 48.5 | 56.5 | 50 | 0 |
| 1908 | 8 3 18  | 3 NOT NAMED | 50.6 | 54.3 | 50 | 0 |
| 1908 | 7 29 0  | 4 NOT NAMED | 29.6 | 94.0 | 30 | 0 |
| 1908 | 7 29 6  | 4 NOT NAMED | 29.3 | 93.5 | 30 | 0 |
| 1908 | 7 29 12 | 4 NOT NAMED | 29.0 | 93.0 | 35 | 0 |
| 1908 | 7 29 18 | 4 NOT NAMED | 28.7 | 92.5 | 40 | 0 |
| 1908 | 7 30 0  | 4 NOT NAMED | 28.4 | 92.0 | 45 | 0 |
| 1908 | 7 30 6  | 4 NOT NAMED | 28.1 | 91.7 | 50 | 0 |
| 1908 | 7 30 12 | 4 NOT NAMED | 28.0 | 91.5 | 50 | 0 |
| 1908 | 7 30 18 | 4 NOT NAMED | 28.1 | 91.4 | 50 | 0 |
| 1908 | 7 31 0  | 4 NOT NAMED | 28.3 | 91.3 | 50 | 0 |
| 1908 | 7 31 6  | 4 NOT NAMED | 28.6 | 91.4 | 50 | 0 |
| 1908 | 7 31 12 | 4 NOT NAMED | 29.0 | 91.5 | 50 | 0 |
| 1908 | 7 31 18 | 4 NOT NAMED | 29.3 | 91.7 | 50 | 0 |
| 1908 | 8 1 0   | 4 NOT NAMED | 29.7 | 92.1 | 40 | 0 |
| 1908 | 8 1 6   | 4 NOT NAMED | 30.1 | 92.7 | 35 | 0 |
| 1908 | 8 1 12  | 4 NOT NAMED | 30.5 | 93.0 | 35 | 0 |
| 1908 | 8 1 18  | 4 NOT NAMED | 30.9 | 93.1 | 35 | 0 |
| 1908 | 8 2 0   | 4 NOT NAMED | 31.2 | 92.9 | 30 | 0 |
| 1908 | 8 2 6   | 4 NOT NAMED | 31.6 | 92.5 | 30 | 0 |



|      |   |    |    |             |      |      |     |   |
|------|---|----|----|-------------|------|------|-----|---|
| 1908 | 8 | 2  | 12 | 4 NOT NAMED | 32.0 | 92.0 | 30  | 0 |
| 1908 | 8 | 2  | 18 | 4 NOT NAMED | 32.4 | 91.5 | 30  | 0 |
| 1908 | 8 | 3  | 0  | 4 NOT NAMED | 32.8 | 91.1 | 25  | 0 |
| 1908 | 8 | 3  | 6  | 4 NOT NAMED | 33.1 | 90.8 | 25  | 0 |
| 1908 | 8 | 3  | 12 | 4 NOT NAMED | 33.5 | 90.5 | 25  | 0 |
| 1908 | 8 | 3  | 18 | 4 NOT NAMED | 34.0 | 90.2 | 25  | 0 |
| 1908 | 8 | 30 | 12 | 5 NOT NAMED | 33.0 | 72.5 | 35  | 0 |
| 1908 | 8 | 30 | 18 | 5 NOT NAMED | 33.0 | 73.2 | 35  | 0 |
| 1908 | 8 | 31 | 0  | 5 NOT NAMED | 33.0 | 74.1 | 35  | 0 |
| 1908 | 8 | 31 | 6  | 5 NOT NAMED | 33.0 | 75.0 | 40  | 0 |
| 1908 | 8 | 31 | 12 | 5 NOT NAMED | 33.0 | 76.0 | 40  | 0 |
| 1908 | 8 | 31 | 18 | 5 NOT NAMED | 33.2 | 76.5 | 40  | 0 |
| 1908 | 9 | 1  | 0  | 5 NOT NAMED | 33.8 | 76.8 | 45  | 0 |
| 1908 | 9 | 1  | 6  | 5 NOT NAMED | 34.4 | 76.7 | 45  | 0 |
| 1908 | 9 | 1  | 12 | 5 NOT NAMED | 35.0 | 76.3 | 45  | 0 |
| 1908 | 9 | 1  | 18 | 5 NOT NAMED | 36.1 | 75.0 | 45  | 0 |
| 1908 | 9 | 2  | 0  | 5 NOT NAMED | 37.2 | 73.6 | 40  | 0 |
| 1908 | 9 | 2  | 6  | 5 NOT NAMED | 38.2 | 72.3 | 40  | 0 |
| 1908 | 9 | 2  | 12 | 5 NOT NAMED | 39.0 | 70.7 | 35  | 0 |
| 1908 | 9 | 2  | 18 | 5 NOT NAMED | 39.8 | 68.2 | 25  | 0 |
| 1908 | 9 | 7  | 12 | 6 NOT NAMED | 15.4 | 51.7 | 40  | 0 |
| 1908 | 9 | 7  | 18 | 6 NOT NAMED | 15.9 | 52.8 | 40  | 0 |
| 1908 | 9 | 8  | 0  | 6 NOT NAMED | 16.3 | 53.8 | 40  | 0 |
| 1908 | 9 | 8  | 6  | 6 NOT NAMED | 16.7 | 54.8 | 40  | 0 |
| 1908 | 9 | 8  | 12 | 6 NOT NAMED | 17.0 | 55.8 | 45  | 0 |
| 1908 | 9 | 8  | 18 | 6 NOT NAMED | 17.2 | 56.6 | 45  | 0 |
| 1908 | 9 | 9  | 0  | 6 NOT NAMED | 17.4 | 57.3 | 45  | 0 |
| 1908 | 9 | 9  | 6  | 6 NOT NAMED | 17.6 | 58.0 | 50  | 0 |
| 1908 | 9 | 9  | 12 | 6 NOT NAMED | 18.0 | 59.5 | 55  | 0 |
| 1908 | 9 | 9  | 18 | 6 NOT NAMED | 18.3 | 60.5 | 55  | 0 |
| 1908 | 9 | 10 | 0  | 6 NOT NAMED | 18.7 | 63.0 | 60  | 0 |
| 1908 | 9 | 10 | 6  | 6 NOT NAMED | 19.0 | 65.0 | 60  | 0 |
| 1908 | 9 | 10 | 12 | 6 NOT NAMED | 19.4 | 66.8 | 60  | 0 |
| 1908 | 9 | 10 | 18 | 6 NOT NAMED | 19.7 | 68.0 | 60  | 0 |
| 1908 | 9 | 11 | 0  | 6 NOT NAMED | 19.8 | 69.2 | 60  | 0 |
| 1908 | 9 | 11 | 6  | 6 NOT NAMED | 20.1 | 70.7 | 65  | 0 |
| 1908 | 9 | 11 | 12 | 6 NOT NAMED | 20.5 | 72.0 | 75  | 0 |
| 1908 | 9 | 11 | 18 | 6 NOT NAMED | 21.0 | 72.9 | 85  | 0 |
| 1908 | 9 | 12 | 0  | 6 NOT NAMED | 21.5 | 73.7 | 95  | 0 |
| 1908 | 9 | 12 | 6  | 6 NOT NAMED | 21.9 | 74.3 | 95  | 0 |
| 1908 | 9 | 12 | 12 | 6 NOT NAMED | 22.5 | 75.0 | 100 | 0 |
| 1908 | 9 | 12 | 18 | 6 NOT NAMED | 22.9 | 75.5 | 100 | 0 |
| 1908 | 9 | 13 | 0  | 6 NOT NAMED | 23.2 | 75.8 | 105 | 0 |
| 1908 | 9 | 13 | 6  | 6 NOT NAMED | 23.8 | 76.1 | 105 | 0 |

|      |         |             |      |      |     |   |
|------|---------|-------------|------|------|-----|---|
| 1908 | 9 13 12 | 6 NOT NAMED | 24.5 | 76.1 | 105 | 0 |
| 1908 | 9 13 18 | 6 NOT NAMED | 25.1 | 75.9 | 105 | 0 |
| 1908 | 9 14 0  | 6 NOT NAMED | 25.7 | 75.5 | 105 | 0 |
| 1908 | 9 14 6  | 6 NOT NAMED | 26.2 | 75.1 | 105 | 0 |
| 1908 | 9 14 12 | 6 NOT NAMED | 26.7 | 74.5 | 105 | 0 |
| 1908 | 9 14 18 | 6 NOT NAMED | 27.5 | 73.6 | 100 | 0 |
| 1908 | 9 15 0  | 6 NOT NAMED | 28.4 | 72.6 | 100 | 0 |
| 1908 | 9 15 6  | 6 NOT NAMED | 29.1 | 71.8 | 95  | 0 |
| 1908 | 9 15 12 | 6 NOT NAMED | 30.0 | 71.0 | 90  | 0 |
| 1908 | 9 15 18 | 6 NOT NAMED | 30.8 | 70.2 | 85  | 0 |
| 1908 | 9 16 0  | 6 NOT NAMED | 31.6 | 69.4 | 85  | 0 |
| 1908 | 9 16 6  | 6 NOT NAMED | 32.5 | 68.6 | 80  | 0 |
| 1908 | 9 16 12 | 6 NOT NAMED | 33.8 | 67.7 | 80  | 0 |
| 1908 | 9 16 18 | 6 NOT NAMED | 35.1 | 67.2 | 75  | 0 |
| 1908 | 9 17 0  | 6 NOT NAMED | 36.3 | 66.8 | 75  | 0 |
| 1908 | 9 17 6  | 6 NOT NAMED | 37.8 | 66.0 | 70  | 0 |
| 1908 | 9 17 12 | 6 NOT NAMED | 39.3 | 65.0 | 70  | 0 |
| 1908 | 9 17 18 | 6 NOT NAMED | 40.4 | 63.9 | 70  | 0 |
| 1908 | 9 18 0  | 6 NOT NAMED | 41.1 | 62.9 | 70  | 0 |
| 1908 | 9 18 6  | 6 NOT NAMED | 41.9 | 61.8 | 70  | 0 |
| 1908 | 9 18 12 | 6 NOT NAMED | 43.0 | 60.0 | 70  | 0 |
| 1908 | 9 18 18 | 6 NOT NAMED | 45.4 | 57.0 | 60  | 0 |
| 1908 | 9 19 0  | 6 NOT NAMED | 48.6 | 53.0 | 55  | 0 |
| 1908 | 9 19 6  | 6 NOT NAMED | 51.5 | 49.6 | 55  | 0 |
| 1908 | 9 19 12 | 6 NOT NAMED | 54.0 | 46.5 | 50  | 0 |
| 1908 | 9 19 18 | 6 NOT NAMED | 56.2 | 43.8 | 50  | 0 |
| 1908 | 9 16 12 | 7 NOT NAMED | 24.7 | 90.5 | 40  | 0 |
| 1908 | 9 16 18 | 7 NOT NAMED | 25.1 | 91.1 | 40  | 0 |
| 1908 | 9 17 0  | 7 NOT NAMED | 25.6 | 91.7 | 45  | 0 |
| 1908 | 9 17 6  | 7 NOT NAMED | 26.0 | 92.1 | 45  | 0 |
| 1908 | 9 17 12 | 7 NOT NAMED | 26.5 | 92.6 | 50  | 0 |
| 1908 | 9 17 18 | 7 NOT NAMED | 27.0 | 93.1 | 55  | 0 |
| 1908 | 9 18 0  | 7 NOT NAMED | 27.4 | 93.4 | 60  | 0 |
| 1908 | 9 18 6  | 7 NOT NAMED | 27.9 | 93.8 | 55  | 0 |
| 1908 | 9 18 12 | 7 NOT NAMED | 28.3 | 93.8 | 35  | 0 |
| 1908 | 9 18 18 | 7 NOT NAMED | 28.7 | 93.4 | 25  | 0 |
| 1908 | 9 21 12 | 8 NOT NAMED | 12.5 | 46.0 | 35  | 0 |
| 1908 | 9 21 18 | 8 NOT NAMED | 12.7 | 47.2 | 35  | 0 |
| 1908 | 9 22 0  | 8 NOT NAMED | 12.9 | 48.3 | 35  | 0 |
| 1908 | 9 22 6  | 8 NOT NAMED | 13.2 | 49.5 | 35  | 0 |
| 1908 | 9 22 12 | 8 NOT NAMED | 13.5 | 50.7 | 35  | 0 |
| 1908 | 9 22 18 | 8 NOT NAMED | 13.8 | 51.8 | 35  | 0 |
| 1908 | 9 23 0  | 8 NOT NAMED | 13.9 | 53.0 | 35  | 0 |
| 1908 | 9 23 6  | 8 NOT NAMED | 14.0 | 54.2 | 35  | 0 |

|      |    |    |    |             |      |      |    |   |
|------|----|----|----|-------------|------|------|----|---|
| 1908 | 9  | 23 | 12 | 8 NOT NAMED | 14.3 | 55.3 | 40 | 0 |
| 1908 | 9  | 23 | 18 | 8 NOT NAMED | 14.5 | 56.3 | 40 | 0 |
| 1908 | 9  | 24 | 0  | 8 NOT NAMED | 14.8 | 57.2 | 40 | 0 |
| 1908 | 9  | 24 | 6  | 8 NOT NAMED | 15.0 | 57.9 | 40 | 0 |
| 1908 | 9  | 24 | 12 | 8 NOT NAMED | 15.3 | 58.7 | 45 | 0 |
| 1908 | 9  | 24 | 18 | 8 NOT NAMED | 15.5 | 59.4 | 50 | 0 |
| 1908 | 9  | 25 | 0  | 8 NOT NAMED | 15.7 | 60.3 | 55 | 0 |
| 1908 | 9  | 25 | 6  | 8 NOT NAMED | 15.8 | 61.0 | 60 | 0 |
| 1908 | 9  | 25 | 12 | 8 NOT NAMED | 16.0 | 61.7 | 65 | 0 |
| 1908 | 9  | 25 | 18 | 8 NOT NAMED | 16.2 | 62.7 | 70 | 0 |
| 1908 | 9  | 26 | 0  | 8 NOT NAMED | 16.4 | 64.1 | 75 | 0 |
| 1908 | 9  | 26 | 6  | 8 NOT NAMED | 16.5 | 65.1 | 75 | 0 |
| 1908 | 9  | 26 | 12 | 8 NOT NAMED | 16.5 | 66.3 | 75 | 0 |
| 1908 | 9  | 26 | 18 | 8 NOT NAMED | 16.5 | 67.4 | 75 | 0 |
| 1908 | 9  | 27 | 0  | 8 NOT NAMED | 16.7 | 68.5 | 75 | 0 |
| 1908 | 9  | 27 | 6  | 8 NOT NAMED | 16.8 | 69.5 | 75 | 0 |
| 1908 | 9  | 27 | 12 | 8 NOT NAMED | 17.0 | 70.5 | 75 | 0 |
| 1908 | 9  | 27 | 18 | 8 NOT NAMED | 17.3 | 71.1 | 75 | 0 |
| 1908 | 9  | 28 | 0  | 8 NOT NAMED | 17.6 | 71.6 | 70 | 0 |
| 1908 | 9  | 28 | 6  | 8 NOT NAMED | 18.1 | 72.2 | 70 | 0 |
| 1908 | 9  | 28 | 12 | 8 NOT NAMED | 18.5 | 72.7 | 65 | 0 |
| 1908 | 9  | 28 | 18 | 8 NOT NAMED | 18.7 | 73.1 | 60 | 0 |
| 1908 | 9  | 29 | 0  | 8 NOT NAMED | 19.1 | 73.7 | 65 | 0 |
| 1908 | 9  | 29 | 6  | 8 NOT NAMED | 19.7 | 74.2 | 70 | 0 |
| 1908 | 9  | 29 | 12 | 8 NOT NAMED | 20.0 | 74.5 | 75 | 0 |
| 1908 | 9  | 29 | 18 | 8 NOT NAMED | 20.4 | 75.0 | 65 | 0 |
| 1908 | 9  | 30 | 0  | 8 NOT NAMED | 21.0 | 75.4 | 70 | 0 |
| 1908 | 9  | 30 | 6  | 8 NOT NAMED | 21.4 | 75.9 | 75 | 0 |
| 1908 | 9  | 30 | 12 | 8 NOT NAMED | 22.0 | 76.3 | 80 | 0 |
| 1908 | 9  | 30 | 18 | 8 NOT NAMED | 22.5 | 76.7 | 85 | 0 |
| 1908 | 10 | 1  | 0  | 8 NOT NAMED | 23.2 | 77.2 | 90 | 0 |
| 1908 | 10 | 1  | 6  | 8 NOT NAMED | 23.9 | 77.7 | 95 | 0 |
| 1908 | 10 | 1  | 12 | 8 NOT NAMED | 24.7 | 78.0 | 95 | 0 |
| 1908 | 10 | 1  | 18 | 8 NOT NAMED | 25.9 | 77.8 | 95 | 0 |
| 1908 | 10 | 2  | 0  | 8 NOT NAMED | 26.8 | 76.5 | 95 | 0 |
| 1908 | 10 | 2  | 6  | 8 NOT NAMED | 27.5 | 74.6 | 95 | 0 |
| 1908 | 10 | 2  | 12 | 8 NOT NAMED | 28.0 | 73.0 | 95 | 0 |
| 1908 | 10 | 2  | 18 | 8 NOT NAMED | 28.4 | 72.1 | 95 | 0 |
| 1908 | 10 | 3  | 0  | 8 NOT NAMED | 28.7 | 71.6 | 95 | 0 |
| 1908 | 10 | 3  | 6  | 8 NOT NAMED | 29.3 | 71.1 | 90 | 0 |
| 1908 | 10 | 3  | 12 | 8 NOT NAMED | 30.0 | 71.5 | 85 | 0 |
| 1908 | 10 | 3  | 18 | 8 NOT NAMED | 29.7 | 72.0 | 80 | 0 |
| 1908 | 10 | 4  | 0  | 8 NOT NAMED | 29.2 | 72.1 | 75 | 0 |
| 1908 | 10 | 4  | 6  | 8 NOT NAMED | 28.8 | 71.6 | 70 | 0 |

|         |          |             |      |      |    |   |
|---------|----------|-------------|------|------|----|---|
| 1908 10 | 4 12     | 8 NOT NAMED | 28.5 | 71.0 | 70 | 0 |
| 1908 10 | 4 18     | 8 NOT NAMED | 29.0 | 70.0 | 70 | 0 |
| 1908 10 | 5 0      | 8 NOT NAMED | 29.7 | 69.2 | 70 | 0 |
| 1908 10 | 5 6      | 8 NOT NAMED | 30.1 | 68.4 | 70 | 0 |
| 1908 10 | 5 12     | 8 NOT NAMED | 30.5 | 67.5 | 70 | 0 |
| 1908 10 | 5 18     | 8 NOT NAMED | 30.8 | 66.2 | 70 | 0 |
| 1908 10 | 6 0      | 8 NOT NAMED | 31.1 | 65.0 | 70 | 0 |
| 1908 10 | 6 6      | 8 NOT NAMED | 31.3 | 63.8 | 70 | 0 |
| 1908 10 | 6 12     | 8 NOT NAMED | 31.5 | 62.7 | 65 | 0 |
| 1908 10 | 6 18     | 8 NOT NAMED | 31.8 | 61.3 | 55 | 0 |
| 1908 10 | 7 0      | 8 NOT NAMED | 32.0 | 60.0 | 45 | 0 |
| 1908 10 | 7 6      | 8 NOT NAMED | 32.3 | 58.7 | 40 | 0 |
| 1908 10 | 7 12     | 8 NOT NAMED | 32.5 | 57.5 | 40 | 0 |
| 1908 10 | 7 18     | 8 NOT NAMED | 32.8 | 56.1 | 40 | 0 |
| 1908 10 | 14 12    | 9 NOT NAMED | 11.7 | 78.5 | 30 | 0 |
| 1908 10 | 14 18    | 9 NOT NAMED | 11.7 | 78.8 | 30 | 0 |
| 1908 10 | 15 0     | 9 NOT NAMED | 11.7 | 79.2 | 35 | 0 |
| 1908 10 | 15 6     | 9 NOT NAMED | 11.7 | 79.6 | 40 | 0 |
| 1908 10 | 15 12    | 9 NOT NAMED | 11.7 | 80.0 | 45 | 0 |
| 1908 10 | 15 18    | 9 NOT NAMED | 11.7 | 80.3 | 45 | 0 |
| 1908 10 | 16 0     | 9 NOT NAMED | 11.8 | 80.7 | 50 | 0 |
| 1908 10 | 16 6     | 9 NOT NAMED | 11.9 | 81.1 | 60 | 0 |
| 1908 10 | 16 12    | 9 NOT NAMED | 12.0 | 81.5 | 65 | 0 |
| 1908 10 | 16 18    | 9 NOT NAMED | 12.1 | 81.8 | 70 | 0 |
| 1908 10 | 17 0     | 9 NOT NAMED | 12.2 | 82.1 | 75 | 0 |
| 1908 10 | 17 6     | 9 NOT NAMED | 12.3 | 82.4 | 80 | 0 |
| 1908 10 | 17 12    | 9 NOT NAMED | 12.5 | 82.7 | 85 | 0 |
| 1908 10 | 17 18    | 9 NOT NAMED | 12.6 | 83.0 | 90 | 0 |
| 1908 10 | 18 0     | 9 NOT NAMED | 12.7 | 83.4 | 90 | 0 |
| 1908 10 | 18 6     | 9 NOT NAMED | 12.8 | 83.7 | 65 | 0 |
| 1908 10 | 18 12    | 9 NOT NAMED | 13.0 | 84.0 | 50 | 0 |
| 1908 10 | 18 18    | 9 NOT NAMED | 13.3 | 84.3 | 35 | 0 |
| 1908 10 | 19 0     | 9 NOT NAMED | 13.8 | 84.8 | 30 | 0 |
| 1908 10 | 19 6     | 9 NOT NAMED | 14.5 | 85.5 | 25 | 0 |
| 1908 10 | 19 12 10 | NOT NAMED   | 35.0 | 72.0 | 35 | 0 |
| 1908 10 | 19 18 10 | NOT NAMED   | 34.3 | 71.5 | 35 | 0 |
| 1908 10 | 20 0 10  | NOT NAMED   | 33.7 | 71.0 | 35 | 0 |
| 1908 10 | 20 6 10  | NOT NAMED   | 33.1 | 70.5 | 35 | 0 |
| 1908 10 | 20 12 10 | NOT NAMED   | 32.5 | 69.7 | 35 | 0 |
| 1908 10 | 20 18 10 | NOT NAMED   | 31.7 | 68.6 | 35 | 0 |
| 1908 10 | 21 0 10  | NOT NAMED   | 30.7 | 67.3 | 35 | 0 |
| 1908 10 | 21 6 10  | NOT NAMED   | 29.6 | 66.3 | 35 | 0 |
| 1908 10 | 21 12 10 | NOT NAMED   | 28.5 | 66.0 | 35 | 0 |
| 1908 10 | 21 18 10 | NOT NAMED   | 27.5 | 67.6 | 35 | 0 |

|      |    |    |    |    |           |      |      |    |   |
|------|----|----|----|----|-----------|------|------|----|---|
| 1908 | 10 | 22 | 0  | 10 | NOT NAMED | 27.4 | 69.9 | 35 | 0 |
| 1908 | 10 | 22 | 6  | 10 | NOT NAMED | 28.2 | 72.1 | 35 | 0 |
| 1908 | 10 | 22 | 12 | 10 | NOT NAMED | 29.0 | 74.0 | 35 | 0 |
| 1908 | 10 | 22 | 18 | 10 | NOT NAMED | 30.3 | 75.4 | 35 | 0 |
| 1908 | 10 | 23 | 0  | 10 | NOT NAMED | 31.4 | 76.6 | 35 | 0 |
| 1908 | 10 | 23 | 6  | 10 | NOT NAMED | 32.4 | 78.2 | 35 | 0 |
| 1908 | 10 | 23 | 12 | 10 | NOT NAMED | 33.4 | 79.7 | 35 | 0 |
| 1908 | 10 | 23 | 18 | 10 | NOT NAMED | 34.2 | 81.0 | 30 | 0 |
| 1909 | 6  | 15 | 0  | 1  | NOT NAMED | 10.6 | 82.5 | 30 | 0 |
| 1909 | 6  | 15 | 6  | 1  | NOT NAMED | 10.8 | 82.5 | 30 | 0 |
| 1909 | 6  | 15 | 12 | 1  | NOT NAMED | 11.0 | 82.5 | 35 | 0 |
| 1909 | 6  | 15 | 18 | 1  | NOT NAMED | 11.2 | 82.5 | 35 | 0 |
| 1909 | 6  | 16 | 0  | 1  | NOT NAMED | 11.5 | 82.5 | 40 | 0 |
| 1909 | 6  | 16 | 6  | 1  | NOT NAMED | 11.7 | 82.5 | 40 | 0 |
| 1909 | 6  | 16 | 12 | 1  | NOT NAMED | 12.0 | 82.5 | 40 | 0 |
| 1909 | 6  | 16 | 18 | 1  | NOT NAMED | 12.2 | 82.5 | 40 | 0 |
| 1909 | 6  | 17 | 0  | 1  | NOT NAMED | 12.4 | 82.5 | 40 | 0 |
| 1909 | 6  | 17 | 6  | 1  | NOT NAMED | 12.6 | 82.5 | 40 | 0 |
| 1909 | 6  | 17 | 12 | 1  | NOT NAMED | 12.8 | 82.5 | 40 | 0 |
| 1909 | 6  | 17 | 18 | 1  | NOT NAMED | 13.0 | 82.5 | 40 | 0 |
| 1909 | 6  | 18 | 0  | 1  | NOT NAMED | 13.2 | 82.6 | 40 | 0 |
| 1909 | 6  | 18 | 6  | 1  | NOT NAMED | 13.4 | 82.7 | 40 | 0 |
| 1909 | 6  | 18 | 12 | 1  | NOT NAMED | 13.5 | 82.8 | 40 | 0 |
| 1909 | 6  | 18 | 18 | 1  | NOT NAMED | 13.7 | 83.0 | 40 | 0 |
| 1909 | 6  | 19 | 0  | 1  | NOT NAMED | 13.8 | 83.3 | 40 | 0 |
| 1909 | 6  | 19 | 6  | 1  | NOT NAMED | 13.9 | 83.6 | 35 | 0 |
| 1909 | 6  | 19 | 12 | 1  | NOT NAMED | 14.0 | 84.0 | 30 | 0 |
| 1909 | 6  | 19 | 18 | 1  | NOT NAMED | 14.0 | 84.5 | 25 | 0 |
| 1909 | 6  | 25 | 12 | 2  | NOT NAMED | 25.0 | 84.0 | 35 | 0 |
| 1909 | 6  | 25 | 18 | 2  | NOT NAMED | 25.5 | 84.7 | 35 | 0 |
| 1909 | 6  | 26 | 0  | 2  | NOT NAMED | 25.9 | 85.5 | 35 | 0 |
| 1909 | 6  | 26 | 6  | 2  | NOT NAMED | 26.3 | 86.2 | 35 | 0 |
| 1909 | 6  | 26 | 12 | 2  | NOT NAMED | 26.7 | 87.0 | 40 | 0 |
| 1909 | 6  | 26 | 18 | 2  | NOT NAMED | 26.7 | 87.7 | 40 | 0 |
| 1909 | 6  | 27 | 0  | 2  | NOT NAMED | 26.6 | 88.5 | 45 | 0 |
| 1909 | 6  | 27 | 6  | 2  | NOT NAMED | 26.6 | 89.3 | 45 | 0 |
| 1909 | 6  | 27 | 12 | 2  | NOT NAMED | 26.5 | 90.1 | 50 | 0 |
| 1909 | 6  | 27 | 18 | 2  | NOT NAMED | 26.5 | 90.9 | 50 | 0 |
| 1909 | 6  | 28 | 0  | 2  | NOT NAMED | 26.4 | 91.7 | 50 | 0 |
| 1909 | 6  | 28 | 6  | 2  | NOT NAMED | 26.4 | 92.5 | 50 | 0 |
| 1909 | 6  | 28 | 12 | 2  | NOT NAMED | 26.3 | 93.3 | 50 | 0 |
| 1909 | 6  | 28 | 18 | 2  | NOT NAMED | 26.3 | 94.1 | 55 | 0 |
| 1909 | 6  | 29 | 0  | 2  | NOT NAMED | 26.2 | 94.9 | 65 | 0 |
| 1909 | 6  | 29 | 6  | 2  | NOT NAMED | 26.2 | 95.7 | 75 | 0 |

|      |         |             |      |      |    |     |
|------|---------|-------------|------|------|----|-----|
| 1909 | 6 29 12 | 2 NOT NAMED | 26.1 | 96.5 | 85 | 0   |
| 1909 | 6 29 18 | 2 NOT NAMED | 26.1 | 97.3 | 70 | 972 |
| 1909 | 6 30 0  | 2 NOT NAMED | 26.0 | 98.0 | 50 | 0   |
| 1909 | 6 30 6  | 2 NOT NAMED | 26.0 | 98.6 | 35 | 0   |
| 1909 | 6 30 12 | 2 NOT NAMED | 26.0 | 99.0 | 30 | 0   |
| 1909 | 6 26 12 | 3 NOT NAMED | 21.0 | 72.0 | 30 | 0   |
| 1909 | 6 26 18 | 3 NOT NAMED | 21.2 | 73.1 | 30 | 0   |
| 1909 | 6 27 0  | 3 NOT NAMED | 21.4 | 74.1 | 30 | 0   |
| 1909 | 6 27 6  | 3 NOT NAMED | 21.7 | 75.1 | 30 | 0   |
| 1909 | 6 27 12 | 3 NOT NAMED | 22.0 | 76.0 | 35 | 0   |
| 1909 | 6 27 18 | 3 NOT NAMED | 22.7 | 76.9 | 35 | 0   |
| 1909 | 6 28 0  | 3 NOT NAMED | 23.4 | 77.6 | 35 | 0   |
| 1909 | 6 28 6  | 3 NOT NAMED | 24.2 | 78.5 | 40 | 0   |
| 1909 | 6 28 12 | 3 NOT NAMED | 25.0 | 79.3 | 45 | 0   |
| 1909 | 6 28 18 | 3 NOT NAMED | 25.8 | 79.9 | 45 | 0   |
| 1909 | 6 29 0  | 3 NOT NAMED | 26.5 | 80.5 | 40 | 0   |
| 1909 | 6 29 6  | 3 NOT NAMED | 27.3 | 81.1 | 35 | 0   |
| 1909 | 6 29 12 | 3 NOT NAMED | 28.0 | 81.7 | 35 | 0   |
| 1909 | 6 29 18 | 3 NOT NAMED | 28.4 | 82.2 | 35 | 0   |
| 1909 | 6 30 0  | 3 NOT NAMED | 29.0 | 82.9 | 35 | 0   |
| 1909 | 6 30 6  | 3 NOT NAMED | 29.5 | 83.4 | 35 | 0   |
| 1909 | 6 30 12 | 3 NOT NAMED | 30.0 | 84.0 | 35 | 0   |
| 1909 | 6 30 18 | 3 NOT NAMED | 30.2 | 84.3 | 30 | 0   |
| 1909 | 7 1 0   | 3 NOT NAMED | 30.4 | 84.5 | 30 | 0   |
| 1909 | 7 1 6   | 3 NOT NAMED | 30.6 | 84.6 | 30 | 0   |
| 1909 | 7 1 12  | 3 NOT NAMED | 31.0 | 84.7 | 30 | 0   |
| 1909 | 7 1 18  | 3 NOT NAMED | 31.3 | 84.6 | 25 | 0   |
| 1909 | 7 2 0   | 3 NOT NAMED | 31.6 | 84.3 | 25 | 0   |
| 1909 | 7 2 6   | 3 NOT NAMED | 31.9 | 83.8 | 25 | 0   |
| 1909 | 7 2 12  | 3 NOT NAMED | 32.0 | 83.5 | 25 | 0   |
| 1909 | 7 2 18  | 3 NOT NAMED | 32.2 | 82.8 | 25 | 0   |
| 1909 | 7 3 0   | 3 NOT NAMED | 32.4 | 81.7 | 25 | 0   |
| 1909 | 7 3 6   | 3 NOT NAMED | 32.4 | 80.7 | 30 | 0   |
| 1909 | 7 3 12  | 3 NOT NAMED | 32.3 | 79.7 | 30 | 0   |
| 1909 | 7 3 18  | 3 NOT NAMED | 32.0 | 78.3 | 30 | 0   |
| 1909 | 7 4 0   | 3 NOT NAMED | 31.5 | 77.0 | 30 | 0   |
| 1909 | 7 4 6   | 3 NOT NAMED | 31.0 | 75.7 | 30 | 0   |
| 1909 | 7 4 12  | 3 NOT NAMED | 30.3 | 74.5 | 30 | 0   |
| 1909 | 7 4 18  | 3 NOT NAMED | 29.6 | 73.2 | 30 | 0   |
| 1909 | 7 13 12 | 4 NOT NAMED | 12.3 | 60.5 | 30 | 0   |
| 1909 | 7 13 18 | 4 NOT NAMED | 12.3 | 62.0 | 30 | 0   |
| 1909 | 7 14 0  | 4 NOT NAMED | 12.4 | 63.5 | 30 | 0   |
| 1909 | 7 14 6  | 4 NOT NAMED | 12.6 | 64.9 | 30 | 0   |
| 1909 | 7 14 12 | 4 NOT NAMED | 13.0 | 66.2 | 30 | 0   |

|      |   |    |    |             |      |      |     |      |
|------|---|----|----|-------------|------|------|-----|------|
| 1909 | 7 | 14 | 18 | 4 NOT NAMED | 13.5 | 67.4 | 30  | 0    |
| 1909 | 7 | 15 | 0  | 4 NOT NAMED | 14.0 | 68.6 | 30  | 0    |
| 1909 | 7 | 15 | 6  | 4 NOT NAMED | 14.5 | 69.8 | 30  | 0    |
| 1909 | 7 | 15 | 12 | 4 NOT NAMED | 14.9 | 71.0 | 30  | 0    |
| 1909 | 7 | 15 | 18 | 4 NOT NAMED | 15.2 | 72.2 | 30  | 0    |
| 1909 | 7 | 16 | 0  | 4 NOT NAMED | 15.5 | 73.3 | 30  | 0    |
| 1909 | 7 | 16 | 6  | 4 NOT NAMED | 15.8 | 74.4 | 30  | 0    |
| 1909 | 7 | 16 | 12 | 4 NOT NAMED | 16.0 | 75.5 | 30  | 0    |
| 1909 | 7 | 16 | 18 | 4 NOT NAMED | 16.2 | 76.7 | 30  | 0    |
| 1909 | 7 | 17 | 0  | 4 NOT NAMED | 16.4 | 77.8 | 35  | 0    |
| 1909 | 7 | 17 | 6  | 4 NOT NAMED | 16.7 | 78.9 | 40  | 0    |
| 1909 | 7 | 17 | 12 | 4 NOT NAMED | 17.2 | 80.0 | 45  | 0    |
| 1909 | 7 | 17 | 18 | 4 NOT NAMED | 18.0 | 81.0 | 50  | 0    |
| 1909 | 7 | 18 | 0  | 4 NOT NAMED | 19.0 | 82.0 | 55  | 0    |
| 1909 | 7 | 18 | 6  | 4 NOT NAMED | 20.0 | 83.0 | 60  | 0    |
| 1909 | 7 | 18 | 12 | 4 NOT NAMED | 21.0 | 84.0 | 60  | 0    |
| 1909 | 7 | 18 | 18 | 4 NOT NAMED | 22.0 | 85.0 | 65  | 0    |
| 1909 | 7 | 19 | 0  | 4 NOT NAMED | 23.0 | 85.9 | 70  | 0    |
| 1909 | 7 | 19 | 6  | 4 NOT NAMED | 24.0 | 86.7 | 70  | 0    |
| 1909 | 7 | 19 | 12 | 4 NOT NAMED | 25.0 | 87.5 | 70  | 0    |
| 1909 | 7 | 19 | 18 | 4 NOT NAMED | 25.6 | 88.3 | 70  | 0    |
| 1909 | 7 | 20 | 0  | 4 NOT NAMED | 26.1 | 88.9 | 70  | 0    |
| 1909 | 7 | 20 | 6  | 4 NOT NAMED | 26.6 | 89.7 | 70  | 0    |
| 1909 | 7 | 20 | 12 | 4 NOT NAMED | 27.0 | 90.6 | 70  | 0    |
| 1909 | 7 | 20 | 18 | 4 NOT NAMED | 27.4 | 91.5 | 70  | 985  |
| 1909 | 7 | 21 | 0  | 4 NOT NAMED | 27.8 | 92.5 | 80  | 0    |
| 1909 | 7 | 21 | 6  | 4 NOT NAMED | 28.2 | 93.5 | 90  | 0    |
| 1909 | 7 | 21 | 12 | 4 NOT NAMED | 28.6 | 94.5 | 100 | 0    |
| 1909 | 7 | 21 | 18 | 4 NOT NAMED | 29.0 | 95.5 | 90  | 959  |
| 1909 | 7 | 22 | 0  | 4 NOT NAMED | 29.3 | 96.5 | 65  | 0    |
| 1909 | 7 | 22 | 6  | 4 NOT NAMED | 29.6 | 97.6 | 30  | 0    |
| 1909 | 7 | 22 | 12 | 4 NOT NAMED | 30.2 | 98.8 | 25  | 0    |
| 1909 | 8 | 6  | 0  | 5 NOT NAMED | 16.6 | 79.5 | 30  | 0    |
| 1909 | 8 | 6  | 6  | 5 NOT NAMED | 17.3 | 80.0 | 30  | 0    |
| 1909 | 8 | 6  | 12 | 5 NOT NAMED | 18.0 | 80.5 | 30  | 0    |
| 1909 | 8 | 6  | 18 | 5 NOT NAMED | 18.8 | 81.2 | 30  | 0    |
| 1909 | 8 | 7  | 0  | 5 NOT NAMED | 19.6 | 82.0 | 35  | 0    |
| 1909 | 8 | 7  | 6  | 5 NOT NAMED | 20.6 | 83.0 | 35  | 0    |
| 1909 | 8 | 7  | 12 | 5 NOT NAMED | 21.0 | 84.3 | 40  | 1004 |
| 1909 | 8 | 7  | 18 | 5 NOT NAMED | 20.9 | 85.4 | 40  | 0    |
| 1909 | 8 | 8  | 0  | 5 NOT NAMED | 20.8 | 86.5 | 40  | 0    |
| 1909 | 8 | 8  | 6  | 5 NOT NAMED | 20.6 | 87.6 | 35  | 0    |
| 1909 | 8 | 8  | 12 | 5 NOT NAMED | 20.5 | 88.5 | 30  | 0    |
| 1909 | 8 | 8  | 18 | 5 NOT NAMED | 20.4 | 89.3 | 30  | 0    |

|      |   |    |    |             |      |      |     |   |
|------|---|----|----|-------------|------|------|-----|---|
| 1909 | 8 | 9  | 0  | 5 NOT NAMED | 20.4 | 90.4 | 30  | 0 |
| 1909 | 8 | 9  | 6  | 5 NOT NAMED | 20.4 | 91.4 | 35  | 0 |
| 1909 | 8 | 9  | 12 | 5 NOT NAMED | 20.5 | 92.5 | 35  | 0 |
| 1909 | 8 | 9  | 18 | 5 NOT NAMED | 20.9 | 93.9 | 35  | 0 |
| 1909 | 8 | 10 | 0  | 5 NOT NAMED | 21.5 | 95.4 | 35  | 0 |
| 1909 | 8 | 10 | 6  | 5 NOT NAMED | 22.3 | 97.0 | 35  | 0 |
| 1909 | 8 | 10 | 12 | 5 NOT NAMED | 23.0 | 98.5 | 30  | 0 |
| 1909 | 8 | 10 | 18 | 5 NOT NAMED | 23.7 | 99.8 | 25  | 0 |
| 1909 | 8 | 20 | 6  | 6 NOT NAMED | 15.4 | 55.3 | 60  | 0 |
| 1909 | 8 | 20 | 12 | 6 NOT NAMED | 15.5 | 56.3 | 60  | 0 |
| 1909 | 8 | 20 | 18 | 6 NOT NAMED | 15.7 | 57.3 | 70  | 0 |
| 1909 | 8 | 21 | 0  | 6 NOT NAMED | 15.9 | 58.2 | 70  | 0 |
| 1909 | 8 | 21 | 6  | 6 NOT NAMED | 16.1 | 59.4 | 70  | 0 |
| 1909 | 8 | 21 | 12 | 6 NOT NAMED | 16.3 | 60.5 | 70  | 0 |
| 1909 | 8 | 21 | 18 | 6 NOT NAMED | 16.5 | 61.9 | 75  | 0 |
| 1909 | 8 | 22 | 0  | 6 NOT NAMED | 16.7 | 63.0 | 75  | 0 |
| 1909 | 8 | 22 | 6  | 6 NOT NAMED | 17.0 | 64.2 | 75  | 0 |
| 1909 | 8 | 22 | 12 | 6 NOT NAMED | 17.3 | 65.7 | 80  | 0 |
| 1909 | 8 | 22 | 18 | 6 NOT NAMED | 17.6 | 67.5 | 80  | 0 |
| 1909 | 8 | 23 | 0  | 6 NOT NAMED | 17.9 | 69.1 | 80  | 0 |
| 1909 | 8 | 23 | 6  | 6 NOT NAMED | 18.3 | 70.7 | 70  | 0 |
| 1909 | 8 | 23 | 12 | 6 NOT NAMED | 18.8 | 72.3 | 65  | 0 |
| 1909 | 8 | 23 | 18 | 6 NOT NAMED | 19.9 | 74.0 | 75  | 0 |
| 1909 | 8 | 24 | 0  | 6 NOT NAMED | 20.3 | 75.8 | 65  | 0 |
| 1909 | 8 | 24 | 6  | 6 NOT NAMED | 20.5 | 77.6 | 65  | 0 |
| 1909 | 8 | 24 | 12 | 6 NOT NAMED | 20.6 | 79.5 | 75  | 0 |
| 1909 | 8 | 24 | 18 | 6 NOT NAMED | 20.7 | 81.1 | 85  | 0 |
| 1909 | 8 | 25 | 0  | 6 NOT NAMED | 20.8 | 82.6 | 95  | 0 |
| 1909 | 8 | 25 | 6  | 6 NOT NAMED | 20.9 | 84.1 | 100 | 0 |
| 1909 | 8 | 25 | 12 | 6 NOT NAMED | 21.0 | 85.5 | 100 | 0 |
| 1909 | 8 | 25 | 18 | 6 NOT NAMED | 21.1 | 86.9 | 90  | 0 |
| 1909 | 8 | 26 | 0  | 6 NOT NAMED | 21.3 | 88.4 | 80  | 0 |
| 1909 | 8 | 26 | 6  | 6 NOT NAMED | 21.6 | 89.7 | 90  | 0 |
| 1909 | 8 | 26 | 12 | 6 NOT NAMED | 22.0 | 91.0 | 100 | 0 |
| 1909 | 8 | 26 | 18 | 6 NOT NAMED | 22.5 | 92.5 | 105 | 0 |
| 1909 | 8 | 27 | 0  | 6 NOT NAMED | 22.9 | 94.0 | 105 | 0 |
| 1909 | 8 | 27 | 6  | 6 NOT NAMED | 23.3 | 95.5 | 105 | 0 |
| 1909 | 8 | 27 | 12 | 6 NOT NAMED | 23.7 | 96.7 | 105 | 0 |
| 1909 | 8 | 27 | 18 | 6 NOT NAMED | 23.8 | 97.3 | 105 | 0 |
| 1909 | 8 | 28 | 0  | 6 NOT NAMED | 23.7 | 97.9 | 85  | 0 |
| 1909 | 8 | 28 | 6  | 6 NOT NAMED | 23.7 | 98.3 | 55  | 0 |
| 1909 | 8 | 28 | 12 | 6 NOT NAMED | 23.7 | 98.7 | 35  | 0 |
| 1909 | 8 | 28 | 0  | 7 NOT NAMED | 23.7 | 73.0 | 35  | 0 |
| 1909 | 8 | 28 | 6  | 7 NOT NAMED | 24.6 | 74.4 | 35  | 0 |



|      |         |             |      |      |     |     |
|------|---------|-------------|------|------|-----|-----|
| 1909 | 8 28 12 | 7 NOT NAMED | 25.5 | 76.0 | 40  | 0   |
| 1909 | 8 28 18 | 7 NOT NAMED | 26.0 | 77.3 | 40  | 0   |
| 1909 | 8 29 0  | 7 NOT NAMED | 26.3 | 78.5 | 45  | 0   |
| 1909 | 8 29 6  | 7 NOT NAMED | 26.4 | 79.6 | 45  | 0   |
| 1909 | 8 29 12 | 7 NOT NAMED | 26.5 | 80.5 | 40  | 0   |
| 1909 | 8 29 18 | 7 NOT NAMED | 26.6 | 80.9 | 35  | 0   |
| 1909 | 8 30 0  | 7 NOT NAMED | 26.8 | 81.2 | 30  | 0   |
| 1909 | 8 30 6  | 7 NOT NAMED | 27.1 | 81.5 | 30  | 0   |
| 1909 | 8 30 12 | 7 NOT NAMED | 27.7 | 81.7 | 30  | 0   |
| 1909 | 8 30 18 | 7 NOT NAMED | 28.5 | 81.3 | 30  | 0   |
| 1909 | 8 31 0  | 7 NOT NAMED | 29.5 | 80.5 | 35  | 0   |
| 1909 | 8 31 6  | 7 NOT NAMED | 30.4 | 79.7 | 35  | 0   |
| 1909 | 8 31 12 | 7 NOT NAMED | 31.0 | 79.0 | 35  | 0   |
| 1909 | 8 31 18 | 7 NOT NAMED | 31.5 | 78.4 | 30  | 0   |
| 1909 | 9 13 12 | 8 NOT NAMED | 17.5 | 71.0 | 30  | 0   |
| 1909 | 9 13 18 | 8 NOT NAMED | 17.8 | 72.5 | 30  | 0   |
| 1909 | 9 14 0  | 8 NOT NAMED | 18.1 | 73.9 | 30  | 0   |
| 1909 | 9 14 6  | 8 NOT NAMED | 18.3 | 75.2 | 30  | 0   |
| 1909 | 9 14 12 | 8 NOT NAMED | 18.5 | 76.5 | 30  | 0   |
| 1909 | 9 14 18 | 8 NOT NAMED | 18.7 | 77.5 | 30  | 0   |
| 1909 | 9 15 0  | 8 NOT NAMED | 18.9 | 78.4 | 35  | 0   |
| 1909 | 9 15 6  | 8 NOT NAMED | 19.1 | 79.3 | 40  | 0   |
| 1909 | 9 15 12 | 8 NOT NAMED | 19.3 | 80.0 | 45  | 0   |
| 1909 | 9 15 18 | 8 NOT NAMED | 19.5 | 80.6 | 50  | 0   |
| 1909 | 9 16 0  | 8 NOT NAMED | 19.6 | 81.0 | 55  | 0   |
| 1909 | 9 16 6  | 8 NOT NAMED | 19.9 | 81.5 | 60  | 0   |
| 1909 | 9 16 12 | 8 NOT NAMED | 20.3 | 82.0 | 65  | 0   |
| 1909 | 9 16 18 | 8 NOT NAMED | 20.6 | 82.4 | 70  | 0   |
| 1909 | 9 17 0  | 8 NOT NAMED | 20.9 | 82.9 | 70  | 0   |
| 1909 | 9 17 6  | 8 NOT NAMED | 21.3 | 83.3 | 75  | 0   |
| 1909 | 9 17 12 | 8 NOT NAMED | 21.7 | 83.7 | 80  | 0   |
| 1909 | 9 17 18 | 8 NOT NAMED | 22.0 | 84.2 | 85  | 976 |
| 1909 | 9 18 0  | 8 NOT NAMED | 22.3 | 84.5 | 75  | 0   |
| 1909 | 9 18 6  | 8 NOT NAMED | 22.6 | 84.9 | 80  | 0   |
| 1909 | 9 18 12 | 8 NOT NAMED | 22.9 | 85.4 | 80  | 0   |
| 1909 | 9 18 18 | 8 NOT NAMED | 23.2 | 85.9 | 85  | 0   |
| 1909 | 9 19 0  | 8 NOT NAMED | 23.5 | 86.7 | 95  | 0   |
| 1909 | 9 19 6  | 8 NOT NAMED | 23.9 | 87.4 | 105 | 0   |
| 1909 | 9 19 12 | 8 NOT NAMED | 24.3 | 88.0 | 105 | 0   |
| 1909 | 9 19 18 | 8 NOT NAMED | 24.8 | 88.5 | 105 | 0   |
| 1909 | 9 20 0  | 8 NOT NAMED | 25.4 | 89.0 | 105 | 0   |
| 1909 | 9 20 6  | 8 NOT NAMED | 26.1 | 89.5 | 105 | 0   |
| 1909 | 9 20 12 | 8 NOT NAMED | 26.9 | 90.1 | 105 | 0   |
| 1909 | 9 20 18 | 8 NOT NAMED | 27.7 | 90.7 | 105 | 0   |

|      |    |    |    |              |      |      |     |     |
|------|----|----|----|--------------|------|------|-----|-----|
| 1909 | 9  | 21 | 0  | 8 NOT NAMED  | 29.5 | 91.3 | 105 | 952 |
| 1909 | 9  | 21 | 6  | 8 NOT NAMED  | 31.4 | 91.7 | 75  | 0   |
| 1909 | 9  | 21 | 12 | 8 NOT NAMED  | 33.2 | 91.5 | 55  | 0   |
| 1909 | 9  | 21 | 18 | 8 NOT NAMED  | 35.0 | 91.3 | 40  | 0   |
| 1909 | 9  | 22 | 0  | 8 NOT NAMED  | 36.8 | 91.1 | 30  | 0   |
| 1909 | 9  | 24 | 0  | 9 NOT NAMED  | 22.0 | 83.0 | 30  | 0   |
| 1909 | 9  | 24 | 6  | 9 NOT NAMED  | 22.5 | 83.0 | 30  | 0   |
| 1909 | 9  | 24 | 12 | 9 NOT NAMED  | 23.0 | 83.0 | 30  | 0   |
| 1909 | 9  | 24 | 18 | 9 NOT NAMED  | 23.5 | 83.0 | 30  | 0   |
| 1909 | 9  | 25 | 0  | 9 NOT NAMED  | 24.1 | 83.0 | 30  | 0   |
| 1909 | 9  | 25 | 6  | 9 NOT NAMED  | 24.7 | 83.0 | 30  | 0   |
| 1909 | 9  | 25 | 12 | 9 NOT NAMED  | 25.3 | 82.8 | 30  | 0   |
| 1909 | 9  | 25 | 18 | 9 NOT NAMED  | 25.8 | 82.2 | 30  | 0   |
| 1909 | 9  | 26 | 0  | 9 NOT NAMED  | 26.3 | 81.3 | 30  | 0   |
| 1909 | 9  | 26 | 6  | 9 NOT NAMED  | 26.9 | 80.4 | 30  | 0   |
| 1909 | 9  | 26 | 12 | 9 NOT NAMED  | 27.5 | 79.5 | 35  | 0   |
| 1909 | 9  | 26 | 18 | 9 NOT NAMED  | 28.0 | 78.9 | 35  | 0   |
| 1909 | 9  | 27 | 0  | 9 NOT NAMED  | 28.4 | 78.4 | 40  | 0   |
| 1909 | 9  | 27 | 6  | 9 NOT NAMED  | 29.0 | 77.8 | 45  | 0   |
| 1909 | 9  | 27 | 12 | 9 NOT NAMED  | 29.5 | 77.0 | 50  | 0   |
| 1909 | 9  | 27 | 18 | 9 NOT NAMED  | 30.1 | 75.0 | 50  | 0   |
| 1909 | 9  | 28 | 0  | 9 NOT NAMED  | 30.6 | 72.8 | 50  | 0   |
| 1909 | 9  | 28 | 6  | 9 NOT NAMED  | 31.1 | 70.6 | 45  | 0   |
| 1909 | 9  | 28 | 12 | 9 NOT NAMED  | 31.5 | 68.7 | 40  | 0   |
| 1909 | 9  | 28 | 18 | 9 NOT NAMED  | 31.8 | 66.9 | 35  | 0   |
| 1909 | 9  | 29 | 0  | 9 NOT NAMED  | 32.2 | 65.5 | 30  | 0   |
| 1909 | 10 | 6  | 12 | 10 NOT NAMED | 10.7 | 76.0 | 30  | 0   |
| 1909 | 10 | 6  | 18 | 10 NOT NAMED | 11.2 | 76.3 | 30  | 0   |
| 1909 | 10 | 7  | 0  | 10 NOT NAMED | 12.0 | 76.8 | 35  | 0   |
| 1909 | 10 | 7  | 6  | 10 NOT NAMED | 12.8 | 77.2 | 40  | 0   |
| 1909 | 10 | 7  | 12 | 10 NOT NAMED | 13.7 | 77.7 | 45  | 0   |
| 1909 | 10 | 7  | 18 | 10 NOT NAMED | 14.5 | 78.2 | 50  | 0   |
| 1909 | 10 | 8  | 0  | 10 NOT NAMED | 15.4 | 78.6 | 55  | 0   |
| 1909 | 10 | 8  | 6  | 10 NOT NAMED | 16.4 | 79.2 | 60  | 0   |
| 1909 | 10 | 8  | 12 | 10 NOT NAMED | 17.2 | 79.8 | 65  | 0   |
| 1909 | 10 | 8  | 18 | 10 NOT NAMED | 17.7 | 80.5 | 70  | 0   |
| 1909 | 10 | 9  | 0  | 10 NOT NAMED | 18.2 | 81.1 | 80  | 0   |
| 1909 | 10 | 9  | 6  | 10 NOT NAMED | 18.6 | 81.7 | 90  | 0   |
| 1909 | 10 | 9  | 12 | 10 NOT NAMED | 19.0 | 82.5 | 95  | 0   |
| 1909 | 10 | 9  | 18 | 10 NOT NAMED | 19.3 | 83.2 | 100 | 0   |
| 1909 | 10 | 10 | 0  | 10 NOT NAMED | 19.6 | 83.8 | 105 | 0   |
| 1909 | 10 | 10 | 6  | 10 NOT NAMED | 20.0 | 84.2 | 105 | 0   |
| 1909 | 10 | 10 | 12 | 10 NOT NAMED | 20.5 | 84.4 | 105 | 0   |
| 1909 | 10 | 10 | 18 | 10 NOT NAMED | 21.1 | 84.5 | 105 | 0   |

|                  |           |           |      |      |     |     |
|------------------|-----------|-----------|------|------|-----|-----|
| 1909 10 11       | 0 10      | NOT NAMED | 21.8 | 84.5 | 105 | 0   |
| 1909 10 11       | 6 10      | NOT NAMED | 22.6 | 84.1 | 105 | 0   |
| 1909 10 11 12 10 |           | NOT NAMED | 23.7 | 83.0 | 105 | 0   |
| 1909 10 11 18 10 |           | NOT NAMED | 24.7 | 81.0 | 100 | 957 |
| 1909 10 12       | 0 10      | NOT NAMED | 26.0 | 78.9 | 90  | 0   |
| 1909 10 12       | 6 10      | NOT NAMED | 27.5 | 76.8 | 80  | 0   |
| 1909 10 12 12 10 |           | NOT NAMED | 29.0 | 74.8 | 70  | 0   |
| 1909 10 12 18 10 |           | NOT NAMED | 30.3 | 72.6 | 60  | 0   |
| 1909 10 13       | 0 10      | NOT NAMED | 31.6 | 70.0 | 50  | 0   |
| 1909 10 13       | 6 10      | NOT NAMED | 32.9 | 67.5 | 40  | 0   |
| 1909 10 13 12 10 |           | NOT NAMED | 34.0 | 65.0 | 35  | 0   |
| 1909 10 13 18 10 |           | NOT NAMED | 34.9 | 62.9 | 30  | 0   |
| 1909 11          | 8 12 11   | NOT NAMED | 10.5 | 81.0 | 35  | 0   |
| 1909 11          | 8 18 11   | NOT NAMED | 10.7 | 80.8 | 35  | 0   |
| 1909 11          | 9 0 11    | NOT NAMED | 10.9 | 80.6 | 35  | 0   |
| 1909 11          | 9 6 11    | NOT NAMED | 11.1 | 80.4 | 35  | 0   |
| 1909 11          | 9 12 11   | NOT NAMED | 11.3 | 80.2 | 35  | 0   |
| 1909 11          | 9 18 11   | NOT NAMED | 11.6 | 80.0 | 35  | 0   |
| 1909 11 10       | 0 11      | NOT NAMED | 12.1 | 79.7 | 35  | 0   |
| 1909 11 10       | 6 11      | NOT NAMED | 12.7 | 79.4 | 40  | 0   |
| 1909 11 10 12 11 |           | NOT NAMED | 13.3 | 79.1 | 40  | 0   |
| 1909 11 10 18 11 |           | NOT NAMED | 13.9 | 78.8 | 45  | 0   |
| 1909 11 11       | 0 11      | NOT NAMED | 14.5 | 78.5 | 45  | 0   |
| 1909 11 11       | 6 11      | NOT NAMED | 15.1 | 78.0 | 50  | 0   |
| 1909 11 11 12 11 |           | NOT NAMED | 15.7 | 77.4 | 50  | 0   |
| 1909 11 11 18 11 |           | NOT NAMED | 16.5 | 76.7 | 55  | 0   |
| 1909 11 12       | 0 11      | NOT NAMED | 17.4 | 76.0 | 60  | 0   |
| 1909 11 12       | 6 11      | NOT NAMED | 18.2 | 75.3 | 65  | 0   |
| 1909 11 12 12 11 |           | NOT NAMED | 19.0 | 74.5 | 70  | 0   |
| 1909 11 12 18 11 |           | NOT NAMED | 19.6 | 73.5 | 75  | 0   |
| 1909 11 13       | 0 11      | NOT NAMED | 20.1 | 72.1 | 80  | 0   |
| 1909 11 13       | 6 11      | NOT NAMED | 20.6 | 70.4 | 85  | 0   |
| 1909 11 13 12 11 |           | NOT NAMED | 21.0 | 68.5 | 90  | 0   |
| 1909 11 13 18 11 |           | NOT NAMED | 21.3 | 66.3 | 90  | 0   |
| 1909 11 14       | 0 11      | NOT NAMED | 21.4 | 64.0 | 90  | 0   |
| 1909 11 14       | 6 11      | NOT NAMED | 21.5 | 61.5 | 85  | 0   |
| 1909 11 14 12 11 |           | NOT NAMED | 21.5 | 59.0 | 80  | 0   |
| 1909 11 14 18 11 |           | NOT NAMED | 21.5 | 56.5 | 75  | 0   |
| 1910             | 8 23 6 1  | NOT NAMED | 15.0 | 62.0 | 35  | 0   |
| 1910             | 8 23 12 1 | NOT NAMED | 15.5 | 63.7 | 35  | 0   |
| 1910             | 8 23 18 1 | NOT NAMED | 15.9 | 65.4 | 35  | 0   |
| 1910             | 8 24 0 1  | NOT NAMED | 16.5 | 67.3 | 35  | 0   |
| 1910             | 8 24 6 1  | NOT NAMED | 17.2 | 69.5 | 35  | 0   |
| 1910             | 8 24 12 1 | NOT NAMED | 18.0 | 71.5 | 35  | 0   |

|      |         |             |      |      |    |   |
|------|---------|-------------|------|------|----|---|
| 1910 | 8 24 18 | 1 NOT NAMED | 18.7 | 72.8 | 30 | 0 |
| 1910 | 8 25 0  | 1 NOT NAMED | 19.4 | 74.0 | 30 | 0 |
| 1910 | 8 25 6  | 1 NOT NAMED | 20.3 | 75.4 | 30 | 0 |
| 1910 | 8 25 12 | 1 NOT NAMED | 21.3 | 76.7 | 30 | 0 |
| 1910 | 8 25 18 | 1 NOT NAMED | 22.5 | 77.5 | 30 | 0 |
| 1910 | 8 26 0  | 1 NOT NAMED | 23.9 | 78.1 | 30 | 0 |
| 1910 | 8 26 6  | 1 NOT NAMED | 25.6 | 78.7 | 30 | 0 |
| 1910 | 8 26 12 | 1 NOT NAMED | 27.5 | 79.0 | 30 | 0 |
| 1910 | 8 26 18 | 1 NOT NAMED | 28.4 | 79.0 | 30 | 0 |
| 1910 | 8 27 0  | 1 NOT NAMED | 29.6 | 79.0 | 35 | 0 |
| 1910 | 8 27 6  | 1 NOT NAMED | 30.7 | 79.0 | 35 | 0 |
| 1910 | 8 27 12 | 1 NOT NAMED | 31.7 | 78.7 | 35 | 0 |
| 1910 | 8 27 18 | 1 NOT NAMED | 32.3 | 78.4 | 35 | 0 |
| 1910 | 8 28 0  | 1 NOT NAMED | 32.9 | 78.0 | 40 | 0 |
| 1910 | 8 28 6  | 1 NOT NAMED | 33.5 | 77.6 | 40 | 0 |
| 1910 | 8 28 12 | 1 NOT NAMED | 34.0 | 77.0 | 40 | 0 |
| 1910 | 8 28 18 | 1 NOT NAMED | 34.9 | 76.1 | 40 | 0 |
| 1910 | 8 29 0  | 1 NOT NAMED | 35.6 | 75.4 | 35 | 0 |
| 1910 | 8 29 6  | 1 NOT NAMED | 36.3 | 74.7 | 35 | 0 |
| 1910 | 8 29 12 | 1 NOT NAMED | 37.0 | 74.0 | 30 | 0 |
| 1910 | 8 29 18 | 1 NOT NAMED | 37.6 | 73.4 | 30 | 0 |
| 1910 | 8 26 12 | 2 NOT NAMED | 26.7 | 91.7 | 30 | 0 |
| 1910 | 8 26 18 | 2 NOT NAMED | 26.7 | 92.0 | 30 | 0 |
| 1910 | 8 27 0  | 2 NOT NAMED | 26.7 | 92.3 | 30 | 0 |
| 1910 | 8 27 6  | 2 NOT NAMED | 26.7 | 92.7 | 30 | 0 |
| 1910 | 8 27 12 | 2 NOT NAMED | 26.7 | 93.0 | 30 | 0 |
| 1910 | 8 27 18 | 2 NOT NAMED | 26.7 | 93.4 | 30 | 0 |
| 1910 | 8 28 0  | 2 NOT NAMED | 26.6 | 93.8 | 30 | 0 |
| 1910 | 8 28 6  | 2 NOT NAMED | 26.6 | 94.2 | 30 | 0 |
| 1910 | 8 28 12 | 2 NOT NAMED | 26.5 | 94.5 | 30 | 0 |
| 1910 | 8 28 18 | 2 NOT NAMED | 26.5 | 94.8 | 30 | 0 |
| 1910 | 8 29 0  | 2 NOT NAMED | 26.4 | 95.0 | 30 | 0 |
| 1910 | 8 29 6  | 2 NOT NAMED | 26.4 | 95.2 | 30 | 0 |
| 1910 | 8 29 12 | 2 NOT NAMED | 26.3 | 95.5 | 30 | 0 |
| 1910 | 8 29 18 | 2 NOT NAMED | 26.2 | 95.8 | 30 | 0 |
| 1910 | 8 30 0  | 2 NOT NAMED | 26.2 | 96.0 | 35 | 0 |
| 1910 | 8 30 6  | 2 NOT NAMED | 26.1 | 96.2 | 35 | 0 |
| 1910 | 8 30 12 | 2 NOT NAMED | 26.0 | 96.5 | 40 | 0 |
| 1910 | 8 30 18 | 2 NOT NAMED | 25.9 | 96.9 | 40 | 0 |
| 1910 | 8 31 0  | 2 NOT NAMED | 25.7 | 97.2 | 40 | 0 |
| 1910 | 8 31 6  | 2 NOT NAMED | 25.5 | 97.6 | 35 | 0 |
| 1910 | 8 31 12 | 2 NOT NAMED | 25.3 | 98.0 | 30 | 0 |
| 1910 | 8 31 18 | 2 NOT NAMED | 25.1 | 98.5 | 25 | 0 |
| 1910 | 9 5 6   | 3 NOT NAMED | 17.0 | 58.3 | 60 | 0 |

|      |   |    |    |             |      |      |    |   |
|------|---|----|----|-------------|------|------|----|---|
| 1910 | 9 | 5  | 12 | 3 NOT NAMED | 17.1 | 59.5 | 65 | 0 |
| 1910 | 9 | 5  | 18 | 3 NOT NAMED | 17.1 | 60.6 | 70 | 0 |
| 1910 | 9 | 6  | 0  | 3 NOT NAMED | 17.1 | 61.7 | 75 | 0 |
| 1910 | 9 | 6  | 6  | 3 NOT NAMED | 17.2 | 62.7 | 80 | 0 |
| 1910 | 9 | 6  | 12 | 3 NOT NAMED | 17.4 | 63.8 | 80 | 0 |
| 1910 | 9 | 6  | 18 | 3 NOT NAMED | 17.5 | 64.9 | 85 | 0 |
| 1910 | 9 | 7  | 0  | 3 NOT NAMED | 17.5 | 66.0 | 85 | 0 |
| 1910 | 9 | 7  | 6  | 3 NOT NAMED | 17.6 | 67.1 | 85 | 0 |
| 1910 | 9 | 7  | 12 | 3 NOT NAMED | 17.6 | 68.2 | 80 | 0 |
| 1910 | 9 | 7  | 18 | 3 NOT NAMED | 17.6 | 69.7 | 75 | 0 |
| 1910 | 9 | 8  | 0  | 3 NOT NAMED | 17.7 | 71.2 | 70 | 0 |
| 1910 | 9 | 8  | 6  | 3 NOT NAMED | 17.8 | 72.9 | 70 | 0 |
| 1910 | 9 | 8  | 12 | 3 NOT NAMED | 18.0 | 74.7 | 70 | 0 |
| 1910 | 9 | 8  | 18 | 3 NOT NAMED | 18.3 | 76.4 | 70 | 0 |
| 1910 | 9 | 9  | 0  | 3 NOT NAMED | 18.6 | 77.8 | 70 | 0 |
| 1910 | 9 | 9  | 6  | 3 NOT NAMED | 19.0 | 79.2 | 70 | 0 |
| 1910 | 9 | 9  | 12 | 3 NOT NAMED | 19.5 | 80.7 | 70 | 0 |
| 1910 | 9 | 9  | 18 | 3 NOT NAMED | 20.0 | 81.8 | 70 | 0 |
| 1910 | 9 | 10 | 0  | 3 NOT NAMED | 20.5 | 82.9 | 70 | 0 |
| 1910 | 9 | 10 | 6  | 3 NOT NAMED | 20.9 | 83.8 | 75 | 0 |
| 1910 | 9 | 10 | 12 | 3 NOT NAMED | 21.3 | 84.7 | 80 | 0 |
| 1910 | 9 | 10 | 18 | 3 NOT NAMED | 21.7 | 85.1 | 80 | 0 |
| 1910 | 9 | 11 | 0  | 3 NOT NAMED | 22.1 | 85.6 | 85 | 0 |
| 1910 | 9 | 11 | 6  | 3 NOT NAMED | 22.5 | 86.2 | 85 | 0 |
| 1910 | 9 | 11 | 12 | 3 NOT NAMED | 22.9 | 87.0 | 85 | 0 |
| 1910 | 9 | 11 | 18 | 3 NOT NAMED | 23.2 | 87.6 | 85 | 0 |
| 1910 | 9 | 12 | 0  | 3 NOT NAMED | 23.6 | 88.3 | 90 | 0 |
| 1910 | 9 | 12 | 6  | 3 NOT NAMED | 24.0 | 88.9 | 90 | 0 |
| 1910 | 9 | 12 | 12 | 3 NOT NAMED | 24.4 | 89.5 | 95 | 0 |
| 1910 | 9 | 12 | 18 | 3 NOT NAMED | 24.9 | 90.3 | 95 | 0 |
| 1910 | 9 | 13 | 0  | 3 NOT NAMED | 25.3 | 91.2 | 95 | 0 |
| 1910 | 9 | 13 | 6  | 3 NOT NAMED | 25.7 | 91.8 | 95 | 0 |
| 1910 | 9 | 13 | 12 | 3 NOT NAMED | 26.0 | 92.5 | 95 | 0 |
| 1910 | 9 | 13 | 18 | 3 NOT NAMED | 26.2 | 93.4 | 95 | 0 |
| 1910 | 9 | 14 | 0  | 3 NOT NAMED | 26.3 | 94.3 | 95 | 0 |
| 1910 | 9 | 14 | 6  | 3 NOT NAMED | 26.5 | 95.3 | 95 | 0 |
| 1910 | 9 | 14 | 12 | 3 NOT NAMED | 26.6 | 96.3 | 95 | 0 |
| 1910 | 9 | 14 | 18 | 3 NOT NAMED | 26.8 | 96.9 | 95 | 0 |
| 1910 | 9 | 15 | 0  | 3 NOT NAMED | 26.9 | 97.6 | 65 | 0 |
| 1910 | 9 | 15 | 6  | 3 NOT NAMED | 27.0 | 98.3 | 45 | 0 |
| 1910 | 9 | 15 | 12 | 3 NOT NAMED | 27.0 | 99.0 | 35 | 0 |
| 1910 | 9 | 15 | 18 | 3 NOT NAMED | 27.0 | 99.6 | 30 | 0 |
| 1910 | 9 | 24 | 6  | 4 NOT NAMED | 27.8 | 60.5 | 35 | 0 |
| 1910 | 9 | 24 | 12 | 4 NOT NAMED | 28.3 | 61.3 | 45 | 0 |

|      |    |    |    |             |      |      |     |     |
|------|----|----|----|-------------|------|------|-----|-----|
| 1910 | 9  | 24 | 18 | 4 NOT NAMED | 28.9 | 62.1 | 55  | 0   |
| 1910 | 9  | 25 | 0  | 4 NOT NAMED | 29.8 | 62.8 | 65  | 0   |
| 1910 | 9  | 25 | 6  | 4 NOT NAMED | 30.8 | 63.4 | 75  | 0   |
| 1910 | 9  | 25 | 12 | 4 NOT NAMED | 32.0 | 63.7 | 85  | 0   |
| 1910 | 9  | 25 | 18 | 4 NOT NAMED | 33.6 | 63.4 | 85  | 0   |
| 1910 | 9  | 26 | 0  | 4 NOT NAMED | 34.8 | 62.8 | 85  | 0   |
| 1910 | 9  | 26 | 6  | 4 NOT NAMED | 36.0 | 61.9 | 85  | 0   |
| 1910 | 9  | 26 | 12 | 4 NOT NAMED | 37.0 | 61.0 | 80  | 0   |
| 1910 | 9  | 26 | 18 | 4 NOT NAMED | 38.1 | 60.2 | 75  | 0   |
| 1910 | 9  | 27 | 0  | 4 NOT NAMED | 39.1 | 59.4 | 70  | 0   |
| 1910 | 9  | 27 | 6  | 4 NOT NAMED | 40.1 | 58.6 | 65  | 0   |
| 1910 | 9  | 27 | 12 | 4 NOT NAMED | 41.0 | 57.5 | 60  | 0   |
| 1910 | 9  | 27 | 18 | 4 NOT NAMED | 41.3 | 56.3 | 60  | 0   |
| 1910 | 9  | 28 | 0  | 4 NOT NAMED | 41.1 | 54.9 | 60  | 0   |
| 1910 | 9  | 28 | 6  | 4 NOT NAMED | 40.9 | 53.7 | 60  | 0   |
| 1910 | 9  | 28 | 12 | 4 NOT NAMED | 40.7 | 52.0 | 60  | 0   |
| 1910 | 9  | 28 | 18 | 4 NOT NAMED | 40.5 | 49.6 | 55  | 0   |
| 1910 | 9  | 29 | 0  | 4 NOT NAMED | 40.8 | 46.1 | 50  | 0   |
| 1910 | 9  | 29 | 6  | 4 NOT NAMED | 41.0 | 42.8 | 45  | 0   |
| 1910 | 9  | 29 | 12 | 4 NOT NAMED | 41.5 | 40.0 | 40  | 0   |
| 1910 | 9  | 29 | 18 | 4 NOT NAMED | 42.1 | 37.4 | 35  | 0   |
| 1910 | 10 | 9  | 6  | 5 NOT NAMED | 11.2 | 79.5 | 30  | 0   |
| 1910 | 10 | 9  | 12 | 5 NOT NAMED | 11.3 | 79.7 | 30  | 0   |
| 1910 | 10 | 9  | 18 | 5 NOT NAMED | 11.3 | 79.7 | 30  | 0   |
| 1910 | 10 | 10 | 0  | 5 NOT NAMED | 11.4 | 79.8 | 30  | 0   |
| 1910 | 10 | 10 | 6  | 5 NOT NAMED | 11.6 | 79.9 | 30  | 0   |
| 1910 | 10 | 10 | 12 | 5 NOT NAMED | 11.8 | 80.0 | 30  | 0   |
| 1910 | 10 | 10 | 18 | 5 NOT NAMED | 12.1 | 80.1 | 30  | 0   |
| 1910 | 10 | 11 | 0  | 5 NOT NAMED | 12.4 | 80.3 | 35  | 0   |
| 1910 | 10 | 11 | 6  | 5 NOT NAMED | 12.8 | 80.5 | 35  | 0   |
| 1910 | 10 | 11 | 12 | 5 NOT NAMED | 13.2 | 80.7 | 40  | 0   |
| 1910 | 10 | 11 | 18 | 5 NOT NAMED | 13.8 | 80.9 | 45  | 0   |
| 1910 | 10 | 12 | 0  | 5 NOT NAMED | 14.6 | 81.1 | 50  | 0   |
| 1910 | 10 | 12 | 6  | 5 NOT NAMED | 15.2 | 81.3 | 55  | 0   |
| 1910 | 10 | 12 | 12 | 5 NOT NAMED | 16.0 | 81.5 | 65  | 0   |
| 1910 | 10 | 12 | 18 | 5 NOT NAMED | 16.9 | 81.8 | 75  | 0   |
| 1910 | 10 | 13 | 0  | 5 NOT NAMED | 17.7 | 82.1 | 85  | 0   |
| 1910 | 10 | 13 | 6  | 5 NOT NAMED | 18.6 | 82.3 | 90  | 0   |
| 1910 | 10 | 13 | 12 | 5 NOT NAMED | 19.5 | 82.5 | 95  | 0   |
| 1910 | 10 | 13 | 18 | 5 NOT NAMED | 20.4 | 82.7 | 95  | 0   |
| 1910 | 10 | 14 | 0  | 5 NOT NAMED | 21.4 | 83.0 | 100 | 0   |
| 1910 | 10 | 14 | 6  | 5 NOT NAMED | 22.3 | 83.6 | 100 | 960 |
| 1910 | 10 | 14 | 12 | 5 NOT NAMED | 23.0 | 84.0 | 90  | 0   |
| 1910 | 10 | 14 | 18 | 5 NOT NAMED | 23.3 | 84.2 | 85  | 0   |

|               |   |             |      |      |     |     |
|---------------|---|-------------|------|------|-----|-----|
| 1910 10 15    | 0 | 5 NOT NAMED | 23.6 | 84.4 | 90  | 0   |
| 1910 10 15    | 6 | 5 NOT NAMED | 23.7 | 84.7 | 90  | 0   |
| 1910 10 15 12 | 5 | 5 NOT NAMED | 23.7 | 85.0 | 90  | 0   |
| 1910 10 15 18 | 5 | 5 NOT NAMED | 23.6 | 85.2 | 90  | 0   |
| 1910 10 16    | 0 | 5 NOT NAMED | 23.4 | 85.3 | 100 | 0   |
| 1910 10 16    | 6 | 5 NOT NAMED | 23.2 | 85.4 | 110 | 0   |
| 1910 10 16 12 | 5 | 5 NOT NAMED | 22.9 | 85.5 | 120 | 0   |
| 1910 10 16 18 | 5 | 5 NOT NAMED | 22.4 | 85.4 | 130 | 0   |
| 1910 10 17    | 0 | 5 NOT NAMED | 22.1 | 84.9 | 130 | 924 |
| 1910 10 17    | 6 | 5 NOT NAMED | 22.5 | 84.3 | 125 | 0   |
| 1910 10 17 12 | 5 | 5 NOT NAMED | 23.4 | 83.5 | 120 | 0   |
| 1910 10 17 18 | 5 | 5 NOT NAMED | 24.4 | 82.8 | 115 | 941 |
| 1910 10 18    | 0 | 5 NOT NAMED | 25.5 | 82.2 | 105 | 0   |
| 1910 10 18    | 6 | 5 NOT NAMED | 26.5 | 82.0 | 95  | 955 |
| 1910 10 18 12 | 5 | 5 NOT NAMED | 27.5 | 81.9 | 70  | 0   |
| 1910 10 18 18 | 5 | 5 NOT NAMED | 28.3 | 81.9 | 60  | 0   |
| 1910 10 19    | 0 | 5 NOT NAMED | 29.2 | 81.9 | 50  | 0   |
| 1910 10 19    | 6 | 5 NOT NAMED | 30.1 | 81.9 | 50  | 0   |
| 1910 10 19 12 | 5 | 5 NOT NAMED | 31.0 | 81.6 | 50  | 0   |
| 1910 10 19 18 | 5 | 5 NOT NAMED | 32.0 | 80.6 | 60  | 0   |
| 1910 10 20    | 0 | 5 NOT NAMED | 32.7 | 79.8 | 60  | 0   |
| 1910 10 20    | 6 | 5 NOT NAMED | 33.6 | 78.5 | 60  | 0   |
| 1910 10 20 12 | 5 | 5 NOT NAMED | 34.4 | 77.1 | 55  | 0   |
| 1910 10 20 18 | 5 | 5 NOT NAMED | 35.3 | 75.0 | 50  | 0   |
| 1910 10 21    | 0 | 5 NOT NAMED | 36.0 | 72.3 | 45  | 0   |
| 1910 10 21    | 6 | 5 NOT NAMED | 36.6 | 69.0 | 45  | 0   |
| 1910 10 21 12 | 5 | 5 NOT NAMED | 37.0 | 66.0 | 45  | 0   |
| 1910 10 21 18 | 5 | 5 NOT NAMED | 37.0 | 64.4 | 40  | 0   |
| 1910 10 22    | 0 | 5 NOT NAMED | 36.8 | 63.2 | 40  | 0   |
| 1910 10 22    | 6 | 5 NOT NAMED | 36.4 | 61.8 | 40  | 0   |
| 1910 10 22 12 | 5 | 5 NOT NAMED | 36.0 | 61.0 | 40  | 0   |
| 1910 10 22 18 | 5 | 5 NOT NAMED | 35.8 | 60.1 | 40  | 0   |
| 1910 10 23    | 0 | 5 NOT NAMED | 35.7 | 58.9 | 35  | 0   |
| 1910 10 23    | 6 | 5 NOT NAMED | 35.7 | 58.2 | 35  | 0   |
| 1910 10 23 12 | 5 | 5 NOT NAMED | 35.7 | 57.3 | 35  | 0   |
| 1910 10 23 18 | 5 | 5 NOT NAMED | 35.7 | 56.4 | 35  | 0   |
| 1911 8 9 6    | 1 | 1 NOT NAMED | 24.8 | 82.0 | 60  | 0   |
| 1911 8 9 12   | 1 | 1 NOT NAMED | 25.4 | 82.5 | 65  | 0   |
| 1911 8 9 18   | 1 | 1 NOT NAMED | 26.0 | 83.0 | 70  | 0   |
| 1911 8 10     | 0 | 1 NOT NAMED | 26.5 | 83.3 | 70  | 0   |
| 1911 8 10     | 6 | 1 NOT NAMED | 27.1 | 83.8 | 70  | 0   |
| 1911 8 10 12  | 1 | 1 NOT NAMED | 27.8 | 84.3 | 70  | 0   |
| 1911 8 10 18  | 1 | 1 NOT NAMED | 28.1 | 84.8 | 70  | 0   |
| 1911 8 11     | 0 | 1 NOT NAMED | 28.6 | 85.4 | 70  | 0   |

|      |      |    |             |      |      |    |     |
|------|------|----|-------------|------|------|----|-----|
| 1911 | 8 11 | 6  | 1 NOT NAMED | 29.0 | 85.9 | 70 | 0   |
| 1911 | 8 11 | 12 | 1 NOT NAMED | 29.5 | 86.5 | 70 | 0   |
| 1911 | 8 11 | 18 | 1 NOT NAMED | 30.0 | 87.1 | 70 | 0   |
| 1911 | 8 12 | 0  | 1 NOT NAMED | 30.5 | 87.6 | 65 | 0   |
| 1911 | 8 12 | 6  | 1 NOT NAMED | 31.0 | 88.1 | 60 | 0   |
| 1911 | 8 12 | 12 | 1 NOT NAMED | 31.5 | 88.6 | 50 | 0   |
| 1911 | 8 12 | 18 | 1 NOT NAMED | 32.0 | 89.0 | 40 | 0   |
| 1911 | 8 13 | 0  | 1 NOT NAMED | 32.4 | 89.3 | 35 | 0   |
| 1911 | 8 13 | 6  | 1 NOT NAMED | 32.9 | 89.7 | 30 | 0   |
| 1911 | 8 13 | 12 | 1 NOT NAMED | 33.4 | 90.0 | 30 | 0   |
| 1911 | 8 13 | 18 | 1 NOT NAMED | 33.9 | 90.4 | 30 | 0   |
| 1911 | 8 14 | 0  | 1 NOT NAMED | 34.4 | 90.7 | 25 | 0   |
| 1911 | 8 14 | 6  | 1 NOT NAMED | 35.0 | 91.1 | 20 | 0   |
| 1911 | 8 14 | 12 | 1 NOT NAMED | 35.5 | 91.5 | 20 | 0   |
| 1911 | 8 23 | 6  | 2 NOT NAMED | 23.7 | 66.8 | 50 | 0   |
| 1911 | 8 23 | 12 | 2 NOT NAMED | 24.1 | 67.4 | 50 | 0   |
| 1911 | 8 23 | 18 | 2 NOT NAMED | 24.5 | 68.0 | 55 | 0   |
| 1911 | 8 24 | 0  | 2 NOT NAMED | 25.0 | 68.7 | 65 | 0   |
| 1911 | 8 24 | 6  | 2 NOT NAMED | 25.4 | 69.3 | 70 | 0   |
| 1911 | 8 24 | 12 | 2 NOT NAMED | 25.8 | 70.0 | 70 | 0   |
| 1911 | 8 24 | 18 | 2 NOT NAMED | 26.2 | 70.7 | 75 | 0   |
| 1911 | 8 25 | 0  | 2 NOT NAMED | 26.5 | 71.4 | 75 | 0   |
| 1911 | 8 25 | 6  | 2 NOT NAMED | 26.9 | 72.1 | 80 | 0   |
| 1911 | 8 25 | 12 | 2 NOT NAMED | 27.3 | 72.8 | 85 | 0   |
| 1911 | 8 25 | 18 | 2 NOT NAMED | 27.9 | 73.5 | 85 | 0   |
| 1911 | 8 26 | 0  | 2 NOT NAMED | 28.7 | 74.3 | 85 | 0   |
| 1911 | 8 26 | 6  | 2 NOT NAMED | 29.6 | 75.1 | 85 | 0   |
| 1911 | 8 26 | 12 | 2 NOT NAMED | 30.1 | 75.8 | 85 | 0   |
| 1911 | 8 26 | 18 | 2 NOT NAMED | 30.5 | 76.4 | 85 | 0   |
| 1911 | 8 27 | 0  | 2 NOT NAMED | 30.8 | 77.1 | 85 | 0   |
| 1911 | 8 27 | 6  | 2 NOT NAMED | 31.1 | 77.8 | 85 | 0   |
| 1911 | 8 27 | 12 | 2 NOT NAMED | 31.5 | 78.7 | 85 | 0   |
| 1911 | 8 27 | 18 | 2 NOT NAMED | 31.7 | 79.2 | 80 | 0   |
| 1911 | 8 28 | 0  | 2 NOT NAMED | 31.8 | 79.6 | 65 | 983 |
| 1911 | 8 28 | 6  | 2 NOT NAMED | 32.0 | 80.3 | 65 | 0   |
| 1911 | 8 28 | 12 | 2 NOT NAMED | 32.2 | 81.0 | 65 | 0   |
| 1911 | 8 28 | 18 | 2 NOT NAMED | 32.3 | 81.5 | 45 | 0   |
| 1911 | 8 29 | 0  | 2 NOT NAMED | 32.4 | 82.0 | 45 | 0   |
| 1911 | 8 29 | 6  | 2 NOT NAMED | 32.4 | 82.5 | 45 | 0   |
| 1911 | 8 29 | 12 | 2 NOT NAMED | 32.5 | 82.9 | 45 | 0   |
| 1911 | 8 29 | 18 | 2 NOT NAMED | 32.8 | 83.0 | 40 | 0   |
| 1911 | 8 30 | 0  | 2 NOT NAMED | 33.2 | 83.0 | 40 | 0   |
| 1911 | 8 30 | 6  | 2 NOT NAMED | 33.6 | 83.0 | 40 | 0   |
| 1911 | 8 30 | 12 | 2 NOT NAMED | 34.0 | 82.8 | 35 | 0   |



|      |    |    |    |   |           |      |      |    |   |
|------|----|----|----|---|-----------|------|------|----|---|
| 1911 | 8  | 30 | 18 | 2 | NOT NAMED | 34.5 | 82.2 | 35 | 0 |
| 1911 | 9  | 3  | 12 | 3 | NOT NAMED | 13.7 | 57.9 | 35 | 0 |
| 1911 | 9  | 3  | 18 | 3 | NOT NAMED | 13.8 | 59.8 | 35 | 0 |
| 1911 | 9  | 4  | 0  | 3 | NOT NAMED | 13.9 | 61.6 | 35 | 0 |
| 1911 | 9  | 4  | 6  | 3 | NOT NAMED | 14.0 | 63.0 | 35 | 0 |
| 1911 | 9  | 4  | 12 | 3 | NOT NAMED | 14.0 | 64.0 | 35 | 0 |
| 1911 | 9  | 4  | 18 | 3 | NOT NAMED | 14.0 | 64.7 | 35 | 0 |
| 1911 | 9  | 5  | 0  | 3 | NOT NAMED | 14.0 | 65.3 | 35 | 0 |
| 1911 | 9  | 5  | 6  | 3 | NOT NAMED | 14.0 | 65.8 | 35 | 0 |
| 1911 | 9  | 5  | 12 | 3 | NOT NAMED | 14.0 | 66.7 | 35 | 0 |
| 1911 | 9  | 5  | 18 | 3 | NOT NAMED | 14.1 | 67.2 | 40 | 0 |
| 1911 | 9  | 6  | 0  | 3 | NOT NAMED | 14.1 | 68.0 | 40 | 0 |
| 1911 | 9  | 6  | 6  | 3 | NOT NAMED | 14.2 | 68.8 | 45 | 0 |
| 1911 | 9  | 6  | 12 | 3 | NOT NAMED | 14.3 | 69.6 | 45 | 0 |
| 1911 | 9  | 6  | 18 | 3 | NOT NAMED | 14.4 | 70.5 | 50 | 0 |
| 1911 | 9  | 7  | 0  | 3 | NOT NAMED | 14.6 | 71.4 | 50 | 0 |
| 1911 | 9  | 7  | 6  | 3 | NOT NAMED | 14.7 | 72.3 | 55 | 0 |
| 1911 | 9  | 7  | 12 | 3 | NOT NAMED | 14.7 | 73.2 | 55 | 0 |
| 1911 | 9  | 7  | 18 | 3 | NOT NAMED | 14.6 | 74.1 | 60 | 0 |
| 1911 | 9  | 8  | 0  | 3 | NOT NAMED | 14.4 | 75.1 | 60 | 0 |
| 1911 | 9  | 8  | 6  | 3 | NOT NAMED | 14.1 | 76.1 | 65 | 0 |
| 1911 | 9  | 8  | 12 | 3 | NOT NAMED | 13.9 | 77.0 | 70 | 0 |
| 1911 | 9  | 8  | 18 | 3 | NOT NAMED | 13.6 | 77.7 | 70 | 0 |
| 1911 | 9  | 9  | 0  | 3 | NOT NAMED | 13.4 | 78.4 | 75 | 0 |
| 1911 | 9  | 9  | 6  | 3 | NOT NAMED | 13.1 | 79.1 | 80 | 0 |
| 1911 | 9  | 9  | 12 | 3 | NOT NAMED | 13.0 | 80.0 | 85 | 0 |
| 1911 | 9  | 9  | 18 | 3 | NOT NAMED | 13.0 | 81.1 | 85 | 0 |
| 1911 | 9  | 10 | 0  | 3 | NOT NAMED | 13.0 | 82.3 | 85 | 0 |
| 1911 | 9  | 10 | 6  | 3 | NOT NAMED | 13.1 | 83.4 | 80 | 0 |
| 1911 | 9  | 10 | 12 | 3 | NOT NAMED | 13.2 | 84.6 | 60 | 0 |
| 1911 | 9  | 10 | 18 | 3 | NOT NAMED | 13.3 | 85.7 | 45 | 0 |
| 1911 | 9  | 11 | 0  | 3 | NOT NAMED | 13.3 | 86.8 | 40 | 0 |
| 1911 | 9  | 11 | 6  | 3 | NOT NAMED | 13.4 | 87.9 | 40 | 0 |
| 1911 | 9  | 11 | 12 | 3 | NOT NAMED | 13.4 | 89.0 | 35 | 0 |
| 1911 | 9  | 11 | 18 | 3 | NOT NAMED | 13.6 | 90.2 | 35 | 0 |
| 1911 | 9  | 12 | 0  | 3 | NOT NAMED | 13.8 | 91.6 | 35 | 0 |
| 1911 | 9  | 12 | 6  | 3 | NOT NAMED | 14.0 | 93.1 | 35 | 0 |
| 1911 | 9  | 12 | 12 | 3 | NOT NAMED | 14.0 | 93.5 | 30 | 0 |
| 1911 | 9  | 12 | 18 | 3 | NOT NAMED | 14.1 | 94.0 | 30 | 0 |
| 1911 | 10 | 23 | 12 | 4 | NOT NAMED | 17.5 | 70.2 | 35 | 0 |
| 1911 | 10 | 23 | 18 | 4 | NOT NAMED | 17.8 | 71.9 | 35 | 0 |
| 1911 | 10 | 24 | 0  | 4 | NOT NAMED | 18.1 | 73.5 | 35 | 0 |
| 1911 | 10 | 24 | 6  | 4 | NOT NAMED | 18.4 | 74.8 | 35 | 0 |
| 1911 | 10 | 24 | 12 | 4 | NOT NAMED | 18.8 | 75.9 | 35 | 0 |

|      |    |    |    |   |           |      |      |    |   |
|------|----|----|----|---|-----------|------|------|----|---|
| 1911 | 10 | 24 | 18 | 4 | NOT NAMED | 18.8 | 76.7 | 35 | 0 |
| 1911 | 10 | 25 | 0  | 4 | NOT NAMED | 19.1 | 77.5 | 35 | 0 |
| 1911 | 10 | 25 | 6  | 4 | NOT NAMED | 19.2 | 78.1 | 35 | 0 |
| 1911 | 10 | 25 | 12 | 4 | NOT NAMED | 19.4 | 78.7 | 35 | 0 |
| 1911 | 10 | 25 | 18 | 4 | NOT NAMED | 19.5 | 79.2 | 35 | 0 |
| 1911 | 10 | 26 | 0  | 4 | NOT NAMED | 19.6 | 79.7 | 35 | 0 |
| 1911 | 10 | 26 | 6  | 4 | NOT NAMED | 19.8 | 80.1 | 35 | 0 |
| 1911 | 10 | 26 | 12 | 4 | NOT NAMED | 19.9 | 80.5 | 35 | 0 |
| 1911 | 10 | 26 | 18 | 4 | NOT NAMED | 20.0 | 80.8 | 40 | 0 |
| 1911 | 10 | 27 | 0  | 4 | NOT NAMED | 20.1 | 81.0 | 40 | 0 |
| 1911 | 10 | 27 | 6  | 4 | NOT NAMED | 20.3 | 81.2 | 40 | 0 |
| 1911 | 10 | 27 | 12 | 4 | NOT NAMED | 20.4 | 81.5 | 45 | 0 |
| 1911 | 10 | 27 | 18 | 4 | NOT NAMED | 20.5 | 81.8 | 45 | 0 |
| 1911 | 10 | 28 | 0  | 4 | NOT NAMED | 20.7 | 82.2 | 45 | 0 |
| 1911 | 10 | 28 | 6  | 4 | NOT NAMED | 20.8 | 82.5 | 45 | 0 |
| 1911 | 10 | 28 | 12 | 4 | NOT NAMED | 21.0 | 82.8 | 45 | 0 |
| 1911 | 10 | 28 | 18 | 4 | NOT NAMED | 21.2 | 83.1 | 45 | 0 |
| 1911 | 10 | 29 | 0  | 4 | NOT NAMED | 21.4 | 83.4 | 45 | 0 |
| 1911 | 10 | 29 | 6  | 4 | NOT NAMED | 21.6 | 83.7 | 40 | 0 |
| 1911 | 10 | 29 | 12 | 4 | NOT NAMED | 21.9 | 84.0 | 40 | 0 |
| 1911 | 10 | 29 | 18 | 4 | NOT NAMED | 22.3 | 84.4 | 35 | 0 |
| 1911 | 10 | 30 | 0  | 4 | NOT NAMED | 22.8 | 84.9 | 35 | 0 |
| 1911 | 10 | 30 | 6  | 4 | NOT NAMED | 23.3 | 85.5 | 35 | 0 |
| 1911 | 10 | 30 | 12 | 4 | NOT NAMED | 23.9 | 85.9 | 35 | 0 |
| 1911 | 10 | 30 | 18 | 4 | NOT NAMED | 24.5 | 86.2 | 35 | 0 |
| 1911 | 10 | 31 | 0  | 4 | NOT NAMED | 25.1 | 86.3 | 35 | 0 |
| 1911 | 10 | 31 | 6  | 4 | NOT NAMED | 25.8 | 86.4 | 35 | 0 |
| 1911 | 10 | 31 | 12 | 4 | NOT NAMED | 26.5 | 86.3 | 35 | 0 |
| 1911 | 10 | 31 | 18 | 4 | NOT NAMED | 27.3 | 85.9 | 30 | 0 |
| 1911 | 11 | 1  | 0  | 4 | NOT NAMED | 28.5 | 84.7 | 30 | 0 |
| 1912 | 6  | 7  | 12 | 1 | NOT NAMED | 23.0 | 85.3 | 35 | 0 |
| 1912 | 6  | 7  | 18 | 1 | NOT NAMED | 23.5 | 85.5 | 35 | 0 |
| 1912 | 6  | 8  | 0  | 1 | NOT NAMED | 23.9 | 85.8 | 35 | 0 |
| 1912 | 6  | 8  | 6  | 1 | NOT NAMED | 24.2 | 86.0 | 35 | 0 |
| 1912 | 6  | 8  | 12 | 1 | NOT NAMED | 24.5 | 86.3 | 35 | 0 |
| 1912 | 6  | 8  | 18 | 1 | NOT NAMED | 24.6 | 86.6 | 35 | 0 |
| 1912 | 6  | 9  | 0  | 1 | NOT NAMED | 24.7 | 86.9 | 35 | 0 |
| 1912 | 6  | 9  | 6  | 1 | NOT NAMED | 24.8 | 87.3 | 35 | 0 |
| 1912 | 6  | 9  | 12 | 1 | NOT NAMED | 24.8 | 87.6 | 35 | 0 |
| 1912 | 6  | 9  | 18 | 1 | NOT NAMED | 24.8 | 87.9 | 40 | 0 |
| 1912 | 6  | 10 | 0  | 1 | NOT NAMED | 24.8 | 88.3 | 40 | 0 |
| 1912 | 6  | 10 | 6  | 1 | NOT NAMED | 24.7 | 88.6 | 45 | 0 |
| 1912 | 6  | 10 | 12 | 1 | NOT NAMED | 24.7 | 89.0 | 45 | 0 |
| 1912 | 6  | 10 | 18 | 1 | NOT NAMED | 24.7 | 89.4 | 45 | 0 |

|      |      |    |             |      |      |    |   |
|------|------|----|-------------|------|------|----|---|
| 1912 | 6 11 | 0  | 1 NOT NAMED | 24.7 | 89.9 | 50 | 0 |
| 1912 | 6 11 | 6  | 1 NOT NAMED | 24.7 | 90.3 | 50 | 0 |
| 1912 | 6 11 | 12 | 1 NOT NAMED | 24.8 | 90.8 | 50 | 0 |
| 1912 | 6 11 | 18 | 1 NOT NAMED | 25.0 | 91.4 | 50 | 0 |
| 1912 | 6 12 | 0  | 1 NOT NAMED | 25.5 | 91.9 | 50 | 0 |
| 1912 | 6 12 | 6  | 1 NOT NAMED | 26.1 | 92.5 | 45 | 0 |
| 1912 | 6 12 | 12 | 1 NOT NAMED | 26.9 | 92.9 | 45 | 0 |
| 1912 | 6 12 | 18 | 1 NOT NAMED | 27.7 | 93.1 | 45 | 0 |
| 1912 | 6 13 | 0  | 1 NOT NAMED | 28.6 | 92.9 | 45 | 0 |
| 1912 | 6 13 | 6  | 1 NOT NAMED | 29.5 | 92.1 | 45 | 0 |
| 1912 | 6 13 | 12 | 1 NOT NAMED | 30.5 | 90.8 | 40 | 0 |
| 1912 | 6 13 | 18 | 1 NOT NAMED | 31.6 | 88.8 | 35 | 0 |
| 1912 | 6 14 | 0  | 1 NOT NAMED | 32.8 | 86.2 | 35 | 0 |
| 1912 | 6 14 | 6  | 1 NOT NAMED | 34.0 | 83.5 | 35 | 0 |
| 1912 | 6 14 | 12 | 1 NOT NAMED | 35.0 | 81.4 | 35 | 0 |
| 1912 | 6 14 | 18 | 1 NOT NAMED | 35.5 | 79.8 | 35 | 0 |
| 1912 | 6 15 | 0  | 1 NOT NAMED | 35.8 | 78.4 | 35 | 0 |
| 1912 | 6 15 | 6  | 1 NOT NAMED | 36.0 | 76.9 | 35 | 0 |
| 1912 | 6 15 | 12 | 1 NOT NAMED | 36.0 | 75.2 | 35 | 0 |
| 1912 | 6 15 | 18 | 1 NOT NAMED | 35.9 | 73.4 | 35 | 0 |
| 1912 | 6 16 | 0  | 1 NOT NAMED | 35.8 | 71.5 | 35 | 0 |
| 1912 | 6 16 | 6  | 1 NOT NAMED | 35.5 | 69.6 | 35 | 0 |
| 1912 | 6 16 | 12 | 1 NOT NAMED | 35.1 | 67.5 | 30 | 0 |
| 1912 | 7 12 | 12 | 2 NOT NAMED | 26.4 | 71.1 | 35 | 0 |
| 1912 | 7 12 | 18 | 2 NOT NAMED | 27.0 | 71.8 | 35 | 0 |
| 1912 | 7 13 | 0  | 2 NOT NAMED | 27.5 | 72.4 | 35 | 0 |
| 1912 | 7 13 | 6  | 2 NOT NAMED | 28.0 | 73.1 | 35 | 0 |
| 1912 | 7 13 | 12 | 2 NOT NAMED | 28.4 | 73.8 | 35 | 0 |
| 1912 | 7 13 | 18 | 2 NOT NAMED | 28.7 | 74.5 | 35 | 0 |
| 1912 | 7 14 | 0  | 2 NOT NAMED | 29.1 | 75.2 | 35 | 0 |
| 1912 | 7 14 | 6  | 2 NOT NAMED | 29.4 | 75.9 | 35 | 0 |
| 1912 | 7 14 | 12 | 2 NOT NAMED | 29.7 | 76.7 | 35 | 0 |
| 1912 | 7 14 | 18 | 2 NOT NAMED | 30.0 | 77.6 | 40 | 0 |
| 1912 | 7 15 | 0  | 2 NOT NAMED | 30.4 | 78.4 | 40 | 0 |
| 1912 | 7 15 | 6  | 2 NOT NAMED | 30.9 | 79.2 | 40 | 0 |
| 1912 | 7 15 | 12 | 2 NOT NAMED | 31.3 | 80.7 | 45 | 0 |
| 1912 | 7 15 | 18 | 2 NOT NAMED | 31.3 | 81.9 | 45 | 0 |
| 1912 | 7 16 | 0  | 2 NOT NAMED | 31.3 | 83.1 | 35 | 0 |
| 1912 | 7 16 | 6  | 2 NOT NAMED | 31.3 | 84.3 | 30 | 0 |
| 1912 | 7 16 | 12 | 2 NOT NAMED | 31.3 | 85.5 | 30 | 0 |
| 1912 | 7 16 | 18 | 2 NOT NAMED | 31.4 | 86.5 | 25 | 0 |
| 1912 | 7 17 | 0  | 2 NOT NAMED | 31.5 | 87.5 | 25 | 0 |
| 1912 | 7 17 | 6  | 2 NOT NAMED | 31.6 | 88.4 | 20 | 0 |
| 1912 | 7 17 | 12 | 2 NOT NAMED | 31.7 | 89.3 | 20 | 0 |

|      |    |    |    |   |           |      |      |    |   |
|------|----|----|----|---|-----------|------|------|----|---|
| 1912 | 9  | 11 | 12 | 3 | NOT NAMED | 29.0 | 84.1 | 60 | 0 |
| 1912 | 9  | 11 | 18 | 3 | NOT NAMED | 28.8 | 84.3 | 60 | 0 |
| 1912 | 9  | 12 | 0  | 3 | NOT NAMED | 28.6 | 84.5 | 65 | 0 |
| 1912 | 9  | 12 | 6  | 3 | NOT NAMED | 28.5 | 84.8 | 70 | 0 |
| 1912 | 9  | 12 | 12 | 3 | NOT NAMED | 28.3 | 85.4 | 70 | 0 |
| 1912 | 9  | 12 | 18 | 3 | NOT NAMED | 28.2 | 85.7 | 70 | 0 |
| 1912 | 9  | 13 | 0  | 3 | NOT NAMED | 28.1 | 86.2 | 70 | 0 |
| 1912 | 9  | 13 | 6  | 3 | NOT NAMED | 28.0 | 86.7 | 70 | 0 |
| 1912 | 9  | 13 | 12 | 3 | NOT NAMED | 28.0 | 87.2 | 70 | 0 |
| 1912 | 9  | 13 | 18 | 3 | NOT NAMED | 28.3 | 87.6 | 70 | 0 |
| 1912 | 9  | 14 | 0  | 3 | NOT NAMED | 29.2 | 88.0 | 70 | 0 |
| 1912 | 9  | 14 | 6  | 3 | NOT NAMED | 30.4 | 88.4 | 65 | 0 |
| 1912 | 9  | 14 | 12 | 3 | NOT NAMED | 31.8 | 88.8 | 50 | 0 |
| 1912 | 9  | 14 | 18 | 3 | NOT NAMED | 35.0 | 88.5 | 30 | 0 |
| 1912 | 10 | 4  | 6  | 4 | NOT NAMED | 28.3 | 76.8 | 50 | 0 |
| 1912 | 10 | 4  | 12 | 4 | NOT NAMED | 29.4 | 76.4 | 50 | 0 |
| 1912 | 10 | 4  | 18 | 4 | NOT NAMED | 30.0 | 75.9 | 55 | 0 |
| 1912 | 10 | 5  | 0  | 4 | NOT NAMED | 30.6 | 75.4 | 55 | 0 |
| 1912 | 10 | 5  | 6  | 4 | NOT NAMED | 31.1 | 75.1 | 60 | 0 |
| 1912 | 10 | 5  | 12 | 4 | NOT NAMED | 31.6 | 74.9 | 65 | 0 |
| 1912 | 10 | 5  | 18 | 4 | NOT NAMED | 32.1 | 74.6 | 70 | 0 |
| 1912 | 10 | 6  | 0  | 4 | NOT NAMED | 32.5 | 74.4 | 70 | 0 |
| 1912 | 10 | 6  | 6  | 4 | NOT NAMED | 32.9 | 74.4 | 75 | 0 |
| 1912 | 10 | 6  | 12 | 4 | NOT NAMED | 33.2 | 75.0 | 75 | 0 |
| 1912 | 10 | 6  | 18 | 4 | NOT NAMED | 33.1 | 75.3 | 80 | 0 |
| 1912 | 10 | 7  | 0  | 4 | NOT NAMED | 32.7 | 75.7 | 80 | 0 |
| 1912 | 10 | 7  | 6  | 4 | NOT NAMED | 32.3 | 76.0 | 80 | 0 |
| 1912 | 10 | 7  | 12 | 4 | NOT NAMED | 32.1 | 75.8 | 80 | 0 |
| 1912 | 10 | 7  | 18 | 4 | NOT NAMED | 32.0 | 75.1 | 80 | 0 |
| 1912 | 10 | 8  | 0  | 4 | NOT NAMED | 31.9 | 74.3 | 75 | 0 |
| 1912 | 10 | 8  | 6  | 4 | NOT NAMED | 32.1 | 73.4 | 75 | 0 |
| 1912 | 10 | 8  | 12 | 4 | NOT NAMED | 32.4 | 72.4 | 75 | 0 |
| 1912 | 10 | 8  | 18 | 4 | NOT NAMED | 32.6 | 71.6 | 70 | 0 |
| 1912 | 10 | 9  | 0  | 4 | NOT NAMED | 32.7 | 70.8 | 60 | 0 |
| 1912 | 10 | 9  | 6  | 4 | NOT NAMED | 32.7 | 69.9 | 55 | 0 |
| 1912 | 10 | 9  | 12 | 4 | NOT NAMED | 32.9 | 69.0 | 35 | 0 |
| 1912 | 10 | 9  | 18 | 4 | NOT NAMED | 33.3 | 67.7 | 25 | 0 |
| 1912 | 10 | 11 | 12 | 5 | NOT NAMED | 19.6 | 80.7 | 60 | 0 |
| 1912 | 10 | 11 | 18 | 5 | NOT NAMED | 19.7 | 81.7 | 65 | 0 |
| 1912 | 10 | 12 | 0  | 5 | NOT NAMED | 19.8 | 82.6 | 70 | 0 |
| 1912 | 10 | 12 | 6  | 5 | NOT NAMED | 19.9 | 83.6 | 75 | 0 |
| 1912 | 10 | 12 | 12 | 5 | NOT NAMED | 20.1 | 84.5 | 75 | 0 |
| 1912 | 10 | 12 | 18 | 5 | NOT NAMED | 20.3 | 85.4 | 80 | 0 |
| 1912 | 10 | 13 | 0  | 5 | NOT NAMED | 20.5 | 86.4 | 80 | 0 |

|            |    |             |      |      |     |   |
|------------|----|-------------|------|------|-----|---|
| 1912 10 13 | 6  | 5 NOT NAMED | 20.8 | 87.3 | 85  | 0 |
| 1912 10 13 | 12 | 5 NOT NAMED | 21.0 | 88.2 | 85  | 0 |
| 1912 10 13 | 18 | 5 NOT NAMED | 21.3 | 89.0 | 85  | 0 |
| 1912 10 14 | 0  | 5 NOT NAMED | 21.5 | 89.7 | 85  | 0 |
| 1912 10 14 | 6  | 5 NOT NAMED | 21.8 | 90.3 | 85  | 0 |
| 1912 10 14 | 12 | 5 NOT NAMED | 22.1 | 91.0 | 85  | 0 |
| 1912 10 14 | 18 | 5 NOT NAMED | 22.4 | 91.8 | 85  | 0 |
| 1912 10 15 | 0  | 5 NOT NAMED | 22.8 | 92.6 | 85  | 0 |
| 1912 10 15 | 6  | 5 NOT NAMED | 23.2 | 93.3 | 85  | 0 |
| 1912 10 15 | 12 | 5 NOT NAMED | 23.8 | 94.1 | 85  | 0 |
| 1912 10 15 | 18 | 5 NOT NAMED | 24.3 | 94.9 | 85  | 0 |
| 1912 10 16 | 0  | 5 NOT NAMED | 25.0 | 95.6 | 80  | 0 |
| 1912 10 16 | 6  | 5 NOT NAMED | 25.5 | 96.2 | 80  | 0 |
| 1912 10 16 | 12 | 5 NOT NAMED | 26.2 | 96.8 | 75  | 0 |
| 1912 10 16 | 18 | 5 NOT NAMED | 26.8 | 97.2 | 70  | 0 |
| 1912 10 17 | 0  | 5 NOT NAMED | 27.3 | 97.6 | 65  | 0 |
| 1912 10 17 | 6  | 5 NOT NAMED | 27.9 | 98.0 | 50  | 0 |
| 1912 10 17 | 12 | 5 NOT NAMED | 28.6 | 98.2 | 30  | 0 |
| 1912 10 17 | 18 | 5 NOT NAMED | 29.2 | 96.9 | 25  | 0 |
| 1912 11 11 | 6  | 6 NOT NAMED | 11.2 | 79.0 | 35  | 0 |
| 1912 11 11 | 12 | 6 NOT NAMED | 11.4 | 80.0 | 35  | 0 |
| 1912 11 11 | 18 | 6 NOT NAMED | 11.7 | 80.3 | 35  | 0 |
| 1912 11 12 | 0  | 6 NOT NAMED | 11.9 | 80.5 | 35  | 0 |
| 1912 11 12 | 6  | 6 NOT NAMED | 12.2 | 80.7 | 35  | 0 |
| 1912 11 12 | 12 | 6 NOT NAMED | 12.4 | 80.7 | 35  | 0 |
| 1912 11 12 | 18 | 6 NOT NAMED | 12.6 | 80.6 | 35  | 0 |
| 1912 11 13 | 0  | 6 NOT NAMED | 12.8 | 80.5 | 35  | 0 |
| 1912 11 13 | 6  | 6 NOT NAMED | 13.0 | 80.4 | 35  | 0 |
| 1912 11 13 | 12 | 6 NOT NAMED | 13.1 | 80.3 | 35  | 0 |
| 1912 11 13 | 18 | 6 NOT NAMED | 13.2 | 80.2 | 35  | 0 |
| 1912 11 14 | 0  | 6 NOT NAMED | 13.2 | 80.1 | 35  | 0 |
| 1912 11 14 | 6  | 6 NOT NAMED | 13.2 | 80.1 | 40  | 0 |
| 1912 11 14 | 12 | 6 NOT NAMED | 13.3 | 80.0 | 40  | 0 |
| 1912 11 14 | 18 | 6 NOT NAMED | 13.5 | 79.9 | 45  | 0 |
| 1912 11 15 | 0  | 6 NOT NAMED | 13.8 | 79.8 | 50  | 0 |
| 1912 11 15 | 6  | 6 NOT NAMED | 14.1 | 79.7 | 60  | 0 |
| 1912 11 15 | 12 | 6 NOT NAMED | 14.4 | 79.6 | 65  | 0 |
| 1912 11 15 | 18 | 6 NOT NAMED | 14.8 | 79.6 | 70  | 0 |
| 1912 11 16 | 0  | 6 NOT NAMED | 15.2 | 79.8 | 80  | 0 |
| 1912 11 16 | 6  | 6 NOT NAMED | 15.7 | 79.9 | 85  | 0 |
| 1912 11 16 | 12 | 6 NOT NAMED | 16.0 | 80.0 | 95  | 0 |
| 1912 11 16 | 18 | 6 NOT NAMED | 16.8 | 80.0 | 100 | 0 |
| 1912 11 17 | 0  | 6 NOT NAMED | 16.5 | 79.8 | 105 | 0 |
| 1912 11 17 | 6  | 6 NOT NAMED | 16.8 | 79.7 | 115 | 0 |

|               |             |      |      |     |   |
|---------------|-------------|------|------|-----|---|
| 1912 11 17 12 | 6 NOT NAMED | 17.0 | 79.5 | 120 | 0 |
| 1912 11 17 18 | 6 NOT NAMED | 17.3 | 79.2 | 125 | 0 |
| 1912 11 18 0  | 6 NOT NAMED | 17.6 | 78.7 | 130 | 0 |
| 1912 11 18 6  | 6 NOT NAMED | 17.8 | 78.4 | 130 | 0 |
| 1912 11 18 12 | 6 NOT NAMED | 18.1 | 78.2 | 130 | 0 |
| 1912 11 18 18 | 6 NOT NAMED | 18.8 | 77.7 | 130 | 0 |
| 1912 11 19 0  | 6 NOT NAMED | 19.1 | 78.0 | 125 | 0 |
| 1912 11 19 6  | 6 NOT NAMED | 18.7 | 78.7 | 125 | 0 |
| 1912 11 19 12 | 6 NOT NAMED | 18.4 | 79.3 | 120 | 0 |
| 1912 11 19 18 | 6 NOT NAMED | 18.3 | 79.7 | 115 | 0 |
| 1912 11 20 0  | 6 NOT NAMED | 18.2 | 80.0 | 110 | 0 |
| 1912 11 20 6  | 6 NOT NAMED | 18.0 | 80.4 | 105 | 0 |
| 1912 11 20 12 | 6 NOT NAMED | 17.9 | 80.8 | 100 | 0 |
| 1912 11 20 18 | 6 NOT NAMED | 18.1 | 81.1 | 95  | 0 |
| 1912 11 21 0  | 6 NOT NAMED | 18.5 | 81.2 | 85  | 0 |
| 1912 11 21 6  | 6 NOT NAMED | 19.2 | 81.0 | 85  | 0 |
| 1912 11 21 12 | 6 NOT NAMED | 20.0 | 80.5 | 75  | 0 |
| 1912 11 21 18 | 6 NOT NAMED | 20.9 | 79.6 | 75  | 0 |
| 1912 11 22 0  | 6 NOT NAMED | 21.9 | 78.5 | 70  | 0 |
| 1912 11 22 6  | 6 NOT NAMED | 23.3 | 77.3 | 70  | 0 |
| 1912 11 22 12 | 6 NOT NAMED | 25.2 | 76.2 | 70  | 0 |
| 1912 11 22 18 | 6 NOT NAMED | 27.5 | 75.1 | 65  | 0 |
| 1912 11 23 0  | 6 NOT NAMED | 29.9 | 74.4 | 65  | 0 |
| 1912 11 23 6  | 6 NOT NAMED | 32.3 | 73.8 | 65  | 0 |
| 1912 11 23 12 | 6 NOT NAMED | 34.6 | 72.9 | 65  | 0 |
| 1912 11 23 18 | 6 NOT NAMED | 36.9 | 71.4 | 65  | 0 |
| 1912 11 24 0  | 6 NOT NAMED | 39.1 | 69.0 | 65  | 0 |
| 1912 11 24 6  | 6 NOT NAMED | 41.3 | 65.8 | 60  | 0 |
| 1912 11 24 12 | 6 NOT NAMED | 43.5 | 62.0 | 60  | 0 |
| 1912 11 24 18 | 6 NOT NAMED | 45.5 | 57.5 | 55  | 0 |
| 1912 11 25 0  | 6 NOT NAMED | 47.3 | 51.8 | 55  | 0 |
| 1912 11 25 6  | 6 NOT NAMED | 48.9 | 45.1 | 50  | 0 |
| 1912 11 25 12 | 6 NOT NAMED | 50.4 | 37.5 | 45  | 0 |
| 1912 11 25 18 | 6 NOT NAMED | 52.0 | 30.0 | 45  | 0 |
| 1913 6 22 6   | 1 NOT NAMED | 11.0 | 80.0 | 60  | 0 |
| 1913 6 22 12  | 1 NOT NAMED | 11.8 | 81.0 | 65  | 0 |
| 1913 6 22 18  | 1 NOT NAMED | 12.4 | 81.8 | 70  | 0 |
| 1913 6 23 0   | 1 NOT NAMED | 13.1 | 82.5 | 70  | 0 |
| 1913 6 23 6   | 1 NOT NAMED | 13.8 | 83.2 | 70  | 0 |
| 1913 6 23 12  | 1 NOT NAMED | 14.5 | 83.7 | 70  | 0 |
| 1913 6 23 18  | 1 NOT NAMED | 15.3 | 84.1 | 70  | 0 |
| 1913 6 24 0   | 1 NOT NAMED | 16.1 | 84.5 | 75  | 0 |
| 1913 6 24 6   | 1 NOT NAMED | 17.0 | 85.0 | 75  | 0 |
| 1913 6 24 12  | 1 NOT NAMED | 17.8 | 85.4 | 80  | 0 |

|      |         |             |      |       |    |      |
|------|---------|-------------|------|-------|----|------|
| 1913 | 6 24 18 | 1 NOT NAMED | 18.5 | 86.0  | 80 | 0    |
| 1913 | 6 25 0  | 1 NOT NAMED | 19.1 | 86.5  | 85 | 0    |
| 1913 | 6 25 6  | 1 NOT NAMED | 19.7 | 86.9  | 85 | 0    |
| 1913 | 6 25 12 | 1 NOT NAMED | 20.3 | 87.4  | 85 | 0    |
| 1913 | 6 25 18 | 1 NOT NAMED | 21.2 | 87.8  | 85 | 0    |
| 1913 | 6 26 0  | 1 NOT NAMED | 22.2 | 88.1  | 85 | 0    |
| 1913 | 6 26 6  | 1 NOT NAMED | 23.2 | 88.4  | 85 | 0    |
| 1913 | 6 26 12 | 1 NOT NAMED | 24.0 | 89.2  | 85 | 0    |
| 1913 | 6 26 18 | 1 NOT NAMED | 24.5 | 90.2  | 85 | 0    |
| 1913 | 6 27 0  | 1 NOT NAMED | 24.9 | 91.7  | 80 | 0    |
| 1913 | 6 27 6  | 1 NOT NAMED | 25.2 | 93.3  | 80 | 0    |
| 1913 | 6 27 12 | 1 NOT NAMED | 25.7 | 94.7  | 75 | 0    |
| 1913 | 6 27 18 | 1 NOT NAMED | 26.3 | 95.9  | 70 | 0    |
| 1913 | 6 28 0  | 1 NOT NAMED | 27.0 | 97.2  | 65 | 1004 |
| 1913 | 6 28 6  | 1 NOT NAMED | 27.7 | 98.4  | 55 | 0    |
| 1913 | 6 28 12 | 1 NOT NAMED | 28.5 | 99.5  | 35 | 0    |
| 1913 | 6 28 18 | 1 NOT NAMED | 30.0 | 100.8 | 20 | 0    |
| 1913 | 8 30 12 | 2 NOT NAMED | 30.0 | 70.0  | 40 | 0    |
| 1913 | 8 30 18 | 2 NOT NAMED | 30.3 | 70.2  | 45 | 0    |
| 1913 | 8 31 0  | 2 NOT NAMED | 30.6 | 70.4  | 50 | 0    |
| 1913 | 8 31 6  | 2 NOT NAMED | 30.8 | 70.7  | 60 | 0    |
| 1913 | 8 31 12 | 2 NOT NAMED | 31.3 | 71.3  | 65 | 0    |
| 1913 | 8 31 18 | 2 NOT NAMED | 31.4 | 71.6  | 70 | 0    |
| 1913 | 9 1 0   | 2 NOT NAMED | 31.6 | 72.0  | 75 | 0    |
| 1913 | 9 1 6   | 2 NOT NAMED | 31.9 | 72.5  | 80 | 0    |
| 1913 | 9 1 12  | 2 NOT NAMED | 32.4 | 73.0  | 80 | 0    |
| 1913 | 9 1 18  | 2 NOT NAMED | 32.6 | 73.5  | 80 | 0    |
| 1913 | 9 2 0   | 2 NOT NAMED | 33.1 | 74.0  | 75 | 0    |
| 1913 | 9 2 6   | 2 NOT NAMED | 33.6 | 74.5  | 70 | 0    |
| 1913 | 9 2 12  | 2 NOT NAMED | 34.0 | 75.0  | 70 | 0    |
| 1913 | 9 2 18  | 2 NOT NAMED | 34.3 | 75.4  | 70 | 0    |
| 1913 | 9 3 0   | 2 NOT NAMED | 34.6 | 75.8  | 70 | 0    |
| 1913 | 9 3 6   | 2 NOT NAMED | 34.8 | 76.1  | 70 | 0    |
| 1913 | 9 3 12  | 2 NOT NAMED | 34.9 | 76.7  | 60 | 0    |
| 1913 | 9 3 18  | 2 NOT NAMED | 35.0 | 77.3  | 50 | 0    |
| 1913 | 9 4 0   | 2 NOT NAMED | 35.1 | 78.7  | 35 | 0    |
| 1913 | 9 4 6   | 2 NOT NAMED | 35.2 | 80.5  | 25 | 0    |
| 1913 | 9 4 12  | 2 NOT NAMED | 35.0 | 82.5  | 20 | 0    |
| 1913 | 9 3 12  | 3 NOT NAMED | 17.0 | 59.6  | 35 | 0    |
| 1913 | 9 3 18  | 3 NOT NAMED | 17.7 | 60.2  | 35 | 0    |
| 1913 | 9 4 0   | 3 NOT NAMED | 18.4 | 60.7  | 35 | 0    |
| 1913 | 9 4 6   | 3 NOT NAMED | 19.1 | 61.1  | 40 | 0    |
| 1913 | 9 4 12  | 3 NOT NAMED | 19.8 | 61.4  | 40 | 0    |
| 1913 | 9 4 18  | 3 NOT NAMED | 20.4 | 61.6  | 45 | 0    |

|      |    |    |    |             |      |      |    |   |
|------|----|----|----|-------------|------|------|----|---|
| 1913 | 9  | 5  | 0  | 3 NOT NAMED | 21.0 | 61.8 | 45 | 0 |
| 1913 | 9  | 5  | 6  | 3 NOT NAMED | 21.6 | 61.9 | 50 | 0 |
| 1913 | 9  | 5  | 12 | 3 NOT NAMED | 22.3 | 62.3 | 50 | 0 |
| 1913 | 9  | 5  | 18 | 3 NOT NAMED | 23.3 | 62.4 | 55 | 0 |
| 1913 | 9  | 6  | 0  | 3 NOT NAMED | 24.6 | 62.7 | 60 | 0 |
| 1913 | 9  | 6  | 6  | 3 NOT NAMED | 25.9 | 62.7 | 60 | 0 |
| 1913 | 9  | 6  | 12 | 3 NOT NAMED | 27.1 | 62.1 | 60 | 0 |
| 1913 | 9  | 6  | 18 | 3 NOT NAMED | 28.2 | 60.5 | 70 | 0 |
| 1913 | 9  | 7  | 0  | 3 NOT NAMED | 29.2 | 58.5 | 70 | 0 |
| 1913 | 9  | 7  | 6  | 3 NOT NAMED | 30.0 | 56.2 | 75 | 0 |
| 1913 | 9  | 7  | 12 | 3 NOT NAMED | 30.6 | 54.0 | 75 | 0 |
| 1913 | 9  | 7  | 18 | 3 NOT NAMED | 30.8 | 51.8 | 80 | 0 |
| 1913 | 9  | 8  | 0  | 3 NOT NAMED | 31.0 | 49.6 | 80 | 0 |
| 1913 | 9  | 8  | 6  | 3 NOT NAMED | 31.3 | 47.4 | 85 | 0 |
| 1913 | 9  | 8  | 12 | 3 NOT NAMED | 32.1 | 45.6 | 85 | 0 |
| 1913 | 9  | 8  | 18 | 3 NOT NAMED | 32.4 | 45.4 | 85 | 0 |
| 1913 | 9  | 9  | 0  | 3 NOT NAMED | 32.9 | 45.3 | 85 | 0 |
| 1913 | 9  | 9  | 6  | 3 NOT NAMED | 33.4 | 45.4 | 85 | 0 |
| 1913 | 9  | 9  | 12 | 3 NOT NAMED | 33.9 | 45.9 | 85 | 0 |
| 1913 | 9  | 9  | 18 | 3 NOT NAMED | 34.4 | 46.4 | 85 | 0 |
| 1913 | 9  | 10 | 0  | 3 NOT NAMED | 34.9 | 46.9 | 85 | 0 |
| 1913 | 9  | 10 | 6  | 3 NOT NAMED | 35.3 | 47.5 | 80 | 0 |
| 1913 | 9  | 10 | 12 | 3 NOT NAMED | 35.8 | 48.2 | 75 | 0 |
| 1913 | 9  | 10 | 18 | 3 NOT NAMED | 36.2 | 49.0 | 70 | 0 |
| 1913 | 9  | 11 | 0  | 3 NOT NAMED | 36.5 | 49.9 | 70 | 0 |
| 1913 | 9  | 11 | 6  | 3 NOT NAMED | 36.8 | 50.9 | 70 | 0 |
| 1913 | 9  | 11 | 12 | 3 NOT NAMED | 37.0 | 52.0 | 70 | 0 |
| 1913 | 9  | 11 | 18 | 3 NOT NAMED | 37.1 | 53.1 | 65 | 0 |
| 1913 | 9  | 12 | 0  | 3 NOT NAMED | 37.1 | 54.4 | 60 | 0 |
| 1913 | 9  | 12 | 6  | 3 NOT NAMED | 36.9 | 55.7 | 45 | 0 |
| 1913 | 9  | 12 | 12 | 3 NOT NAMED | 36.0 | 57.0 | 35 | 0 |
| 1913 | 9  | 12 | 18 | 3 NOT NAMED | 35.0 | 56.8 | 30 | 0 |
| 1913 | 10 | 6  | 6  | 4 NOT NAMED | 34.7 | 70.8 | 50 | 0 |
| 1913 | 10 | 6  | 12 | 4 NOT NAMED | 34.0 | 71.8 | 50 | 0 |
| 1913 | 10 | 6  | 18 | 4 NOT NAMED | 33.5 | 72.6 | 50 | 0 |
| 1913 | 10 | 7  | 0  | 4 NOT NAMED | 33.1 | 73.4 | 50 | 0 |
| 1913 | 10 | 7  | 6  | 4 NOT NAMED | 32.8 | 74.2 | 50 | 0 |
| 1913 | 10 | 7  | 12 | 4 NOT NAMED | 32.6 | 75.0 | 50 | 0 |
| 1913 | 10 | 7  | 18 | 4 NOT NAMED | 32.6 | 76.0 | 50 | 0 |
| 1913 | 10 | 8  | 0  | 4 NOT NAMED | 32.6 | 77.1 | 50 | 0 |
| 1913 | 10 | 8  | 6  | 4 NOT NAMED | 32.6 | 78.2 | 45 | 0 |
| 1913 | 10 | 8  | 12 | 4 NOT NAMED | 32.8 | 79.1 | 45 | 0 |
| 1913 | 10 | 8  | 18 | 4 NOT NAMED | 33.0 | 79.8 | 45 | 0 |
| 1913 | 10 | 9  | 0  | 4 NOT NAMED | 33.2 | 80.2 | 40 | 0 |



|      |    |    |    |   |           |      |      |    |   |
|------|----|----|----|---|-----------|------|------|----|---|
| 1913 | 10 | 9  | 6  | 4 | NOT NAMED | 33.5 | 80.4 | 35 | 0 |
| 1913 | 10 | 9  | 12 | 4 | NOT NAMED | 33.7 | 80.4 | 35 | 0 |
| 1913 | 10 | 9  | 18 | 4 | NOT NAMED | 34.0 | 80.3 | 35 | 0 |
| 1913 | 10 | 10 | 0  | 4 | NOT NAMED | 34.3 | 80.1 | 35 | 0 |
| 1913 | 10 | 10 | 6  | 4 | NOT NAMED | 34.5 | 79.9 | 35 | 0 |
| 1913 | 10 | 10 | 12 | 4 | NOT NAMED | 34.8 | 79.6 | 30 | 0 |
| 1913 | 10 | 10 | 18 | 4 | NOT NAMED | 34.9 | 79.2 | 30 | 0 |
| 1913 | 10 | 11 | 0  | 4 | NOT NAMED | 34.9 | 78.8 | 25 | 0 |
| 1913 | 10 | 11 | 6  | 4 | NOT NAMED | 35.0 | 78.4 | 20 | 0 |
| 1913 | 10 | 11 | 12 | 4 | NOT NAMED | 35.1 | 77.9 | 15 | 0 |
| 1914 | 9  | 14 | 12 | 1 | NOT NAMED | 23.8 | 73.5 | 35 | 0 |
| 1914 | 9  | 14 | 18 | 1 | NOT NAMED | 23.9 | 73.6 | 35 | 0 |
| 1914 | 9  | 15 | 0  | 1 | NOT NAMED | 24.2 | 73.9 | 35 | 0 |
| 1914 | 9  | 15 | 6  | 1 | NOT NAMED | 24.6 | 74.2 | 35 | 0 |
| 1914 | 9  | 15 | 12 | 1 | NOT NAMED | 25.4 | 74.8 | 35 | 0 |
| 1914 | 9  | 15 | 18 | 1 | NOT NAMED | 26.0 | 75.5 | 35 | 0 |
| 1914 | 9  | 16 | 0  | 1 | NOT NAMED | 26.9 | 76.3 | 40 | 0 |
| 1914 | 9  | 16 | 6  | 1 | NOT NAMED | 27.8 | 77.2 | 40 | 0 |
| 1914 | 9  | 16 | 12 | 1 | NOT NAMED | 29.1 | 78.2 | 45 | 0 |
| 1914 | 9  | 16 | 18 | 1 | NOT NAMED | 29.5 | 79.3 | 45 | 0 |
| 1914 | 9  | 17 | 0  | 1 | NOT NAMED | 30.4 | 80.4 | 40 | 0 |
| 1914 | 9  | 17 | 6  | 1 | NOT NAMED | 31.0 | 81.6 | 40 | 0 |
| 1914 | 9  | 17 | 12 | 1 | NOT NAMED | 31.5 | 83.1 | 35 | 0 |
| 1914 | 9  | 17 | 18 | 1 | NOT NAMED | 31.5 | 84.3 | 35 | 0 |
| 1914 | 9  | 18 | 0  | 1 | NOT NAMED | 31.1 | 85.9 | 35 | 0 |
| 1914 | 9  | 18 | 6  | 1 | NOT NAMED | 30.5 | 87.4 | 35 | 0 |
| 1914 | 9  | 18 | 12 | 1 | NOT NAMED | 30.2 | 88.8 | 35 | 0 |
| 1914 | 9  | 18 | 18 | 1 | NOT NAMED | 30.1 | 90.0 | 35 | 0 |
| 1914 | 9  | 19 | 0  | 1 | NOT NAMED | 30.0 | 91.2 | 35 | 0 |
| 1914 | 9  | 19 | 6  | 1 | NOT NAMED | 30.0 | 92.2 | 35 | 0 |
| 1914 | 9  | 19 | 12 | 1 | NOT NAMED | 30.0 | 93.1 | 30 | 0 |
| 1915 | 7  | 31 | 6  | 1 | NOT NAMED | 27.4 | 76.0 | 35 | 0 |
| 1915 | 7  | 31 | 12 | 1 | NOT NAMED | 27.5 | 77.0 | 35 | 0 |
| 1915 | 7  | 31 | 18 | 1 | NOT NAMED | 27.7 | 77.8 | 35 | 0 |
| 1915 | 8  | 1  | 0  | 1 | NOT NAMED | 27.9 | 78.6 | 35 | 0 |
| 1915 | 8  | 1  | 6  | 1 | NOT NAMED | 28.1 | 79.3 | 35 | 0 |
| 1915 | 8  | 1  | 12 | 1 | NOT NAMED | 28.4 | 79.9 | 40 | 0 |
| 1915 | 8  | 1  | 18 | 1 | NOT NAMED | 28.7 | 80.5 | 40 | 0 |
| 1915 | 8  | 2  | 0  | 1 | NOT NAMED | 29.1 | 80.9 | 45 | 0 |
| 1915 | 8  | 2  | 6  | 1 | NOT NAMED | 29.6 | 81.4 | 45 | 0 |
| 1915 | 8  | 2  | 12 | 1 | NOT NAMED | 30.2 | 81.8 | 45 | 0 |
| 1915 | 8  | 2  | 18 | 1 | NOT NAMED | 30.9 | 82.2 | 45 | 0 |
| 1915 | 8  | 3  | 0  | 1 | NOT NAMED | 31.8 | 82.4 | 40 | 0 |
| 1915 | 8  | 3  | 6  | 1 | NOT NAMED | 32.9 | 82.3 | 40 | 0 |

|      |   |    |    |             |      |      |     |   |
|------|---|----|----|-------------|------|------|-----|---|
| 1915 | 8 | 3  | 12 | 1 NOT NAMED | 34.0 | 81.6 | 30  | 0 |
| 1915 | 8 | 3  | 18 | 1 NOT NAMED | 35.4 | 80.2 | 30  | 0 |
| 1915 | 8 | 4  | 0  | 1 NOT NAMED | 37.0 | 78.7 | 30  | 0 |
| 1915 | 8 | 4  | 6  | 1 NOT NAMED | 38.7 | 77.2 | 25  | 0 |
| 1915 | 8 | 4  | 12 | 1 NOT NAMED | 40.1 | 75.8 | 25  | 0 |
| 1915 | 8 | 4  | 18 | 1 NOT NAMED | 40.9 | 74.5 | 20  | 0 |
| 1915 | 8 | 5  | 0  | 1 NOT NAMED | 41.6 | 73.1 | 20  | 0 |
| 1915 | 8 | 5  | 6  | 1 NOT NAMED | 42.0 | 71.8 | 15  | 0 |
| 1915 | 8 | 5  | 12 | 1 NOT NAMED | 42.4 | 70.5 | 15  | 0 |
| 1915 | 8 | 5  | 12 | 2 NOT NAMED | 15.3 | 25.2 | 35  | 0 |
| 1915 | 8 | 5  | 18 | 2 NOT NAMED | 15.2 | 26.1 | 35  | 0 |
| 1915 | 8 | 6  | 0  | 2 NOT NAMED | 15.2 | 27.2 | 35  | 0 |
| 1915 | 8 | 6  | 6  | 2 NOT NAMED | 15.2 | 28.6 | 35  | 0 |
| 1915 | 8 | 6  | 12 | 2 NOT NAMED | 15.3 | 30.4 | 35  | 0 |
| 1915 | 8 | 6  | 18 | 2 NOT NAMED | 15.4 | 32.3 | 35  | 0 |
| 1915 | 8 | 7  | 0  | 2 NOT NAMED | 15.5 | 34.8 | 35  | 0 |
| 1915 | 8 | 7  | 6  | 2 NOT NAMED | 15.7 | 37.1 | 35  | 0 |
| 1915 | 8 | 7  | 12 | 2 NOT NAMED | 15.8 | 39.0 | 40  | 0 |
| 1915 | 8 | 7  | 18 | 2 NOT NAMED | 15.9 | 40.5 | 45  | 0 |
| 1915 | 8 | 8  | 0  | 2 NOT NAMED | 16.1 | 42.0 | 45  | 0 |
| 1915 | 8 | 8  | 6  | 2 NOT NAMED | 16.2 | 43.5 | 50  | 0 |
| 1915 | 8 | 8  | 12 | 2 NOT NAMED | 16.3 | 45.0 | 55  | 0 |
| 1915 | 8 | 8  | 18 | 2 NOT NAMED | 16.4 | 46.5 | 60  | 0 |
| 1915 | 8 | 9  | 0  | 2 NOT NAMED | 16.5 | 48.0 | 65  | 0 |
| 1915 | 8 | 9  | 6  | 2 NOT NAMED | 16.6 | 49.5 | 70  | 0 |
| 1915 | 8 | 9  | 12 | 2 NOT NAMED | 16.5 | 51.0 | 70  | 0 |
| 1915 | 8 | 9  | 18 | 2 NOT NAMED | 16.7 | 52.9 | 70  | 0 |
| 1915 | 8 | 10 | 0  | 2 NOT NAMED | 16.7 | 55.2 | 75  | 0 |
| 1915 | 8 | 10 | 6  | 2 NOT NAMED | 16.6 | 57.7 | 75  | 0 |
| 1915 | 8 | 10 | 12 | 2 NOT NAMED | 16.5 | 59.7 | 75  | 0 |
| 1915 | 8 | 10 | 18 | 2 NOT NAMED | 16.5 | 61.4 | 80  | 0 |
| 1915 | 8 | 11 | 0  | 2 NOT NAMED | 16.5 | 63.1 | 80  | 0 |
| 1915 | 8 | 11 | 6  | 2 NOT NAMED | 16.5 | 64.7 | 80  | 0 |
| 1915 | 8 | 11 | 12 | 2 NOT NAMED | 16.6 | 66.3 | 85  | 0 |
| 1915 | 8 | 11 | 18 | 2 NOT NAMED | 16.7 | 67.9 | 85  | 0 |
| 1915 | 8 | 12 | 0  | 2 NOT NAMED | 16.8 | 69.5 | 85  | 0 |
| 1915 | 8 | 12 | 6  | 2 NOT NAMED | 17.0 | 71.0 | 90  | 0 |
| 1915 | 8 | 12 | 12 | 2 NOT NAMED | 17.3 | 72.6 | 90  | 0 |
| 1915 | 8 | 12 | 18 | 2 NOT NAMED | 17.7 | 74.1 | 90  | 0 |
| 1915 | 8 | 13 | 0  | 2 NOT NAMED | 18.1 | 75.5 | 95  | 0 |
| 1915 | 8 | 13 | 6  | 2 NOT NAMED | 18.5 | 76.9 | 95  | 0 |
| 1915 | 8 | 13 | 12 | 2 NOT NAMED | 18.8 | 78.2 | 100 | 0 |
| 1915 | 8 | 13 | 18 | 2 NOT NAMED | 19.3 | 79.4 | 100 | 0 |
| 1915 | 8 | 14 | 0  | 2 NOT NAMED | 19.8 | 80.6 | 100 | 0 |

|      |      |    |             |      |      |     |     |
|------|------|----|-------------|------|------|-----|-----|
| 1915 | 8 14 | 6  | 2 NOT NAMED | 20.3 | 81.7 | 105 | 0   |
| 1915 | 8 14 | 12 | 2 NOT NAMED | 20.8 | 82.8 | 105 | 0   |
| 1915 | 8 14 | 18 | 2 NOT NAMED | 21.4 | 83.9 | 105 | 0   |
| 1915 | 8 15 | 0  | 2 NOT NAMED | 22.0 | 84.9 | 105 | 0   |
| 1915 | 8 15 | 6  | 2 NOT NAMED | 22.6 | 85.9 | 105 | 0   |
| 1915 | 8 15 | 12 | 2 NOT NAMED | 23.5 | 87.0 | 110 | 0   |
| 1915 | 8 15 | 18 | 2 NOT NAMED | 24.0 | 88.1 | 110 | 0   |
| 1915 | 8 16 | 0  | 2 NOT NAMED | 24.7 | 89.2 | 115 | 0   |
| 1915 | 8 16 | 6  | 2 NOT NAMED | 25.5 | 90.3 | 115 | 0   |
| 1915 | 8 16 | 12 | 2 NOT NAMED | 26.2 | 91.1 | 120 | 0   |
| 1915 | 8 16 | 18 | 2 NOT NAMED | 27.1 | 92.4 | 120 | 0   |
| 1915 | 8 17 | 0  | 2 NOT NAMED | 28.0 | 93.6 | 120 | 0   |
| 1915 | 8 17 | 6  | 2 NOT NAMED | 28.9 | 94.7 | 105 | 953 |
| 1915 | 8 17 | 12 | 2 NOT NAMED | 29.6 | 95.8 | 65  | 0   |
| 1915 | 8 17 | 18 | 2 NOT NAMED | 30.2 | 96.5 | 60  | 0   |
| 1915 | 8 18 | 0  | 2 NOT NAMED | 30.7 | 96.7 | 55  | 0   |
| 1915 | 8 18 | 6  | 2 NOT NAMED | 31.2 | 96.6 | 50  | 0   |
| 1915 | 8 18 | 12 | 2 NOT NAMED | 31.7 | 96.4 | 45  | 0   |
| 1915 | 8 18 | 18 | 2 NOT NAMED | 32.2 | 96.1 | 40  | 0   |
| 1915 | 8 19 | 0  | 2 NOT NAMED | 32.7 | 95.8 | 40  | 0   |
| 1915 | 8 19 | 6  | 2 NOT NAMED | 33.1 | 95.3 | 35  | 0   |
| 1915 | 8 19 | 12 | 2 NOT NAMED | 33.6 | 94.6 | 30  | 0   |
| 1915 | 8 19 | 18 | 2 NOT NAMED | 34.3 | 93.5 | 30  | 0   |
| 1915 | 8 20 | 0  | 2 NOT NAMED | 35.2 | 92.4 | 30  | 0   |
| 1915 | 8 20 | 6  | 2 NOT NAMED | 36.2 | 91.2 | 30  | 0   |
| 1915 | 8 20 | 12 | 2 NOT NAMED | 37.0 | 90.1 | 25  | 0   |
| 1915 | 8 20 | 18 | 2 NOT NAMED | 37.7 | 89.1 | 25  | 0   |
| 1915 | 8 21 | 0  | 2 NOT NAMED | 38.2 | 88.1 | 25  | 0   |
| 1915 | 8 21 | 6  | 2 NOT NAMED | 38.8 | 87.1 | 30  | 0   |
| 1915 | 8 21 | 12 | 2 NOT NAMED | 39.5 | 86.0 | 30  | 0   |
| 1915 | 8 21 | 18 | 2 NOT NAMED | 40.4 | 84.5 | 35  | 0   |
| 1915 | 8 22 | 0  | 2 NOT NAMED | 41.5 | 82.7 | 35  | 0   |
| 1915 | 8 22 | 6  | 2 NOT NAMED | 42.6 | 80.7 | 30  | 0   |
| 1915 | 8 22 | 12 | 2 NOT NAMED | 43.5 | 79.0 | 25  | 0   |
| 1915 | 8 22 | 18 | 2 NOT NAMED | 44.3 | 77.5 | 25  | 0   |
| 1915 | 8 23 | 0  | 2 NOT NAMED | 45.0 | 76.1 | 25  | 0   |
| 1915 | 8 23 | 6  | 2 NOT NAMED | 45.6 | 74.7 | 25  | 0   |
| 1915 | 8 23 | 12 | 2 NOT NAMED | 46.2 | 73.4 | 25  | 0   |
| 1915 | 8 23 | 18 | 2 NOT NAMED | 47.5 | 70.0 | 25  | 0   |
| 1915 | 8 28 | 0  | 3 NOT NAMED | 22.0 | 47.0 | 60  | 0   |
| 1915 | 8 28 | 6  | 3 NOT NAMED | 22.9 | 48.5 | 65  | 0   |
| 1915 | 8 28 | 12 | 3 NOT NAMED | 23.9 | 50.3 | 70  | 0   |
| 1915 | 8 28 | 18 | 3 NOT NAMED | 24.4 | 50.7 | 70  | 0   |
| 1915 | 8 29 | 0  | 3 NOT NAMED | 24.9 | 51.4 | 75  | 0   |

|      |         |   |             |      |      |     |   |
|------|---------|---|-------------|------|------|-----|---|
| 1915 | 8 29    | 6 | 3 NOT NAMED | 25.4 | 52.1 | 75  | 0 |
| 1915 | 8 29 12 | 3 | NOT NAMED   | 25.9 | 52.9 | 80  | 0 |
| 1915 | 8 29 18 | 3 | NOT NAMED   | 26.4 | 53.7 | 80  | 0 |
| 1915 | 8 30    | 0 | 3 NOT NAMED | 26.9 | 54.6 | 85  | 0 |
| 1915 | 8 30    | 6 | 3 NOT NAMED | 27.3 | 55.5 | 85  | 0 |
| 1915 | 8 30 12 | 3 | NOT NAMED   | 27.8 | 56.3 | 90  | 0 |
| 1915 | 8 30 18 | 3 | NOT NAMED   | 28.2 | 57.1 | 90  | 0 |
| 1915 | 8 31    | 0 | 3 NOT NAMED | 28.6 | 57.8 | 90  | 0 |
| 1915 | 8 31    | 6 | 3 NOT NAMED | 29.0 | 58.5 | 95  | 0 |
| 1915 | 8 31 12 | 3 | NOT NAMED   | 29.4 | 59.0 | 95  | 0 |
| 1915 | 8 31 18 | 3 | NOT NAMED   | 29.8 | 59.4 | 95  | 0 |
| 1915 | 9 1     | 0 | 3 NOT NAMED | 30.2 | 59.8 | 95  | 0 |
| 1915 | 9 1     | 6 | 3 NOT NAMED | 30.5 | 60.2 | 100 | 0 |
| 1915 | 9 1 12  | 3 | NOT NAMED   | 30.7 | 60.6 | 100 | 0 |
| 1915 | 9 1 18  | 3 | NOT NAMED   | 31.2 | 61.0 | 100 | 0 |
| 1915 | 9 2     | 0 | 3 NOT NAMED | 31.5 | 61.3 | 100 | 0 |
| 1915 | 9 2     | 6 | 3 NOT NAMED | 31.8 | 61.6 | 105 | 0 |
| 1915 | 9 2 12  | 3 | NOT NAMED   | 32.0 | 62.0 | 105 | 0 |
| 1915 | 9 2 18  | 3 | NOT NAMED   | 32.3 | 62.6 | 105 | 0 |
| 1915 | 9 3     | 0 | 3 NOT NAMED | 32.5 | 63.5 | 105 | 0 |
| 1915 | 9 3     | 6 | 3 NOT NAMED | 32.7 | 64.3 | 105 | 0 |
| 1915 | 9 3 12  | 3 | NOT NAMED   | 32.7 | 64.9 | 105 | 0 |
| 1915 | 9 3 18  | 3 | NOT NAMED   | 32.5 | 65.2 | 105 | 0 |
| 1915 | 9 4     | 0 | 3 NOT NAMED | 32.2 | 65.3 | 105 | 0 |
| 1915 | 9 4     | 6 | 3 NOT NAMED | 31.8 | 65.2 | 105 | 0 |
| 1915 | 9 4 12  | 3 | NOT NAMED   | 31.5 | 64.8 | 105 | 0 |
| 1915 | 9 4 18  | 3 | NOT NAMED   | 31.3 | 64.5 | 105 | 0 |
| 1915 | 9 5     | 0 | 3 NOT NAMED | 31.2 | 64.3 | 105 | 0 |
| 1915 | 9 5     | 6 | 3 NOT NAMED | 30.9 | 64.1 | 105 | 0 |
| 1915 | 9 5 12  | 3 | NOT NAMED   | 30.7 | 64.0 | 105 | 0 |
| 1915 | 9 5 18  | 3 | NOT NAMED   | 30.5 | 64.1 | 105 | 0 |
| 1915 | 9 6     | 0 | 3 NOT NAMED | 30.4 | 64.3 | 100 | 0 |
| 1915 | 9 6     | 6 | 3 NOT NAMED | 30.3 | 64.5 | 100 | 0 |
| 1915 | 9 6 12  | 3 | NOT NAMED   | 30.2 | 64.8 | 95  | 0 |
| 1915 | 9 6 18  | 3 | NOT NAMED   | 30.2 | 65.1 | 95  | 0 |
| 1915 | 9 7     | 0 | 3 NOT NAMED | 30.3 | 65.5 | 90  | 0 |
| 1915 | 9 7     | 6 | 3 NOT NAMED | 30.5 | 65.8 | 90  | 0 |
| 1915 | 9 7 12  | 3 | NOT NAMED   | 30.8 | 66.1 | 90  | 0 |
| 1915 | 9 7 18  | 3 | NOT NAMED   | 31.2 | 66.3 | 90  | 0 |
| 1915 | 9 8     | 0 | 3 NOT NAMED | 31.7 | 66.5 | 90  | 0 |
| 1915 | 9 8     | 6 | 3 NOT NAMED | 32.2 | 66.6 | 85  | 0 |
| 1915 | 9 8 12  | 3 | NOT NAMED   | 32.5 | 66.7 | 85  | 0 |
| 1915 | 9 8 18  | 3 | NOT NAMED   | 33.2 | 66.7 | 85  | 0 |
| 1915 | 9 9     | 0 | 3 NOT NAMED | 33.7 | 66.5 | 85  | 0 |

|      |   |    |    |             |      |      |    |      |
|------|---|----|----|-------------|------|------|----|------|
| 1915 | 9 | 9  | 6  | 3 NOT NAMED | 34.2 | 66.2 | 80 | 0    |
| 1915 | 9 | 9  | 12 | 3 NOT NAMED | 34.8 | 65.7 | 80 | 0    |
| 1915 | 9 | 9  | 18 | 3 NOT NAMED | 35.5 | 65.1 | 75 | 0    |
| 1915 | 9 | 10 | 0  | 3 NOT NAMED | 36.4 | 64.2 | 70 | 0    |
| 1915 | 9 | 10 | 6  | 3 NOT NAMED | 37.5 | 63.1 | 65 | 0    |
| 1915 | 9 | 10 | 12 | 3 NOT NAMED | 38.7 | 61.9 | 60 | 0    |
| 1915 | 9 | 10 | 18 | 3 NOT NAMED | 41.0 | 58.1 | 55 | 0    |
| 1915 | 9 | 11 | 0  | 3 NOT NAMED | 42.7 | 56.0 | 55 | 0    |
| 1915 | 8 | 31 | 12 | 4 NOT NAMED | 15.3 | 78.8 | 55 | 0    |
| 1915 | 8 | 31 | 18 | 4 NOT NAMED | 15.8 | 78.8 | 55 | 0    |
| 1915 | 9 | 1  | 0  | 4 NOT NAMED | 16.4 | 78.9 | 60 | 0    |
| 1915 | 9 | 1  | 6  | 4 NOT NAMED | 17.0 | 79.1 | 65 | 0    |
| 1915 | 9 | 1  | 12 | 4 NOT NAMED | 17.6 | 79.6 | 70 | 0    |
| 1915 | 9 | 1  | 18 | 4 NOT NAMED | 18.2 | 80.3 | 70 | 0    |
| 1915 | 9 | 2  | 0  | 4 NOT NAMED | 18.9 | 81.1 | 75 | 0    |
| 1915 | 9 | 2  | 6  | 4 NOT NAMED | 19.7 | 81.9 | 75 | 0    |
| 1915 | 9 | 2  | 12 | 4 NOT NAMED | 20.5 | 82.6 | 80 | 0    |
| 1915 | 9 | 2  | 18 | 4 NOT NAMED | 21.4 | 83.2 | 80 | 0    |
| 1915 | 9 | 3  | 0  | 4 NOT NAMED | 22.5 | 83.7 | 85 | 0    |
| 1915 | 9 | 3  | 6  | 4 NOT NAMED | 23.6 | 84.2 | 85 | 0    |
| 1915 | 9 | 3  | 12 | 4 NOT NAMED | 24.8 | 84.8 | 85 | 0    |
| 1915 | 9 | 3  | 18 | 4 NOT NAMED | 26.0 | 85.1 | 85 | 0    |
| 1915 | 9 | 4  | 0  | 4 NOT NAMED | 27.4 | 85.3 | 80 | 0    |
| 1915 | 9 | 4  | 6  | 4 NOT NAMED | 28.7 | 85.4 | 80 | 0    |
| 1915 | 9 | 4  | 12 | 4 NOT NAMED | 30.2 | 85.4 | 75 | 0    |
| 1915 | 9 | 4  | 18 | 4 NOT NAMED | 31.8 | 85.3 | 65 | 1003 |
| 1915 | 9 | 5  | 0  | 4 NOT NAMED | 33.5 | 85.0 | 45 | 0    |
| 1915 | 9 | 5  | 6  | 4 NOT NAMED | 35.3 | 84.7 | 30 | 0    |
| 1915 | 9 | 5  | 12 | 4 NOT NAMED | 36.9 | 84.6 | 30 | 0    |
| 1915 | 9 | 5  | 18 | 4 NOT NAMED | 38.4 | 84.6 | 25 | 0    |
| 1915 | 9 | 6  | 0  | 4 NOT NAMED | 39.8 | 84.6 | 20 | 0    |
| 1915 | 9 | 6  | 6  | 4 NOT NAMED | 41.1 | 84.7 | 20 | 0    |
| 1915 | 9 | 6  | 12 | 4 NOT NAMED | 42.4 | 84.9 | 15 | 0    |
| 1915 | 9 | 22 | 6  | 5 NOT NAMED | 14.6 | 62.1 | 60 | 0    |
| 1915 | 9 | 22 | 12 | 5 NOT NAMED | 14.7 | 63.4 | 65 | 0    |
| 1915 | 9 | 22 | 18 | 5 NOT NAMED | 14.7 | 64.6 | 70 | 0    |
| 1915 | 9 | 23 | 0  | 5 NOT NAMED | 14.8 | 65.8 | 70 | 0    |
| 1915 | 9 | 23 | 6  | 5 NOT NAMED | 14.8 | 67.2 | 70 | 0    |
| 1915 | 9 | 23 | 12 | 5 NOT NAMED | 14.8 | 68.4 | 75 | 0    |
| 1915 | 9 | 23 | 18 | 5 NOT NAMED | 14.9 | 69.8 | 75 | 0    |
| 1915 | 9 | 24 | 0  | 5 NOT NAMED | 15.0 | 70.9 | 80 | 0    |
| 1915 | 9 | 24 | 6  | 5 NOT NAMED | 15.1 | 72.0 | 80 | 0    |
| 1915 | 9 | 24 | 12 | 5 NOT NAMED | 15.3 | 73.2 | 85 | 0    |
| 1915 | 9 | 24 | 18 | 5 NOT NAMED | 15.5 | 74.4 | 85 | 0    |

|      |      |    |             |             |      |      |     |   |
|------|------|----|-------------|-------------|------|------|-----|---|
| 1915 | 9 25 | 0  | 5 NOT NAMED | 15.8        | 75.7 | 85   | 0   |   |
| 1915 | 9 25 | 6  | 5 NOT NAMED | 16.1        | 76.9 | 85   | 0   |   |
| 1915 | 9 25 | 12 | 5 NOT NAMED | 16.5        | 78.3 | 90   | 0   |   |
| 1915 | 9 25 | 18 | 5 NOT NAMED | 16.9        | 79.2 | 90   | 0   |   |
| 1915 | 9 26 | 0  | 5 NOT NAMED | 17.3        | 80.1 | 90   | 0   |   |
| 1915 | 9 26 | 6  | 5 NOT NAMED | 17.8        | 80.9 | 90   | 0   |   |
| 1915 | 9 26 | 12 | 5 NOT NAMED | 18.3        | 81.7 | 95   | 0   |   |
| 1915 | 9 26 | 18 | 5 NOT NAMED | 18.8        | 82.5 | 95   | 0   |   |
| 1915 | 9 27 | 0  | 5 NOT NAMED | 19.4        | 83.2 | 95   | 0   |   |
| 1915 | 9 27 | 6  | 5 NOT NAMED | 20.0        | 83.9 | 95   | 0   |   |
| 1915 | 9 27 | 12 | 5 NOT NAMED | 20.7        | 84.6 | 95   | 0   |   |
| 1915 | 9 27 | 18 | 5 NOT NAMED | 21.5        | 85.3 | 95   | 0   |   |
| 1915 | 9 28 | 0  | 5 NOT NAMED | 22.3        | 85.9 | 95   | 0   |   |
| 1915 | 9 28 | 6  | 5 NOT NAMED | 23.1        | 86.6 | 100  | 0   |   |
| 1915 | 9 28 | 12 | 5 NOT NAMED | 23.8        | 87.2 | 100  | 0   |   |
| 1915 | 9 28 | 18 | 5 NOT NAMED | 24.9        | 87.8 | 100  | 0   |   |
| 1915 | 9 29 | 0  | 5 NOT NAMED | 25.9        | 88.5 | 105  | 0   |   |
| 1915 | 9 29 | 6  | 5 NOT NAMED | 26.8        | 89.1 | 110  | 0   |   |
| 1915 | 9 29 | 12 | 5 NOT NAMED | 27.8        | 89.7 | 115  | 935 |   |
| 1915 | 9 29 | 18 | 5 NOT NAMED | 28.8        | 90.1 | 85   | 0   |   |
| 1915 | 9 30 | 0  | 5 NOT NAMED | 29.9        | 90.1 | 60   | 952 |   |
| 1915 | 9 30 | 6  | 5 NOT NAMED | 31.1        | 89.8 | 60   | 0   |   |
| 1915 | 9 30 | 12 | 5 NOT NAMED | 32.3        | 89.3 | 50   | 0   |   |
| 1915 | 9 30 | 18 | 5 NOT NAMED | 33.7        | 88.4 | 40   | 0   |   |
| 1915 | 10   | 1  | 0           | 5 NOT NAMED | 35.2 | 86.8 | 35  | 0 |
| 1915 | 10   | 1  | 6           | 5 NOT NAMED | 36.9 | 84.8 | 35  | 0 |
| 1915 | 10   | 1  | 12          | 5 NOT NAMED | 38.7 | 82.4 | 35  | 0 |
| 1915 | 10   | 1  | 18          | 5 NOT NAMED | 40.5 | 79.8 | 35  | 0 |
| 1916 | 6 29 | 12 | 1 NOT NAMED | 12.0        | 80.9 | 35   | 0   |   |
| 1916 | 6 29 | 18 | 1 NOT NAMED | 12.5        | 81.1 | 35   | 0   |   |
| 1916 | 6 30 | 0  | 1 NOT NAMED | 12.9        | 81.4 | 35   | 0   |   |
| 1916 | 6 30 | 6  | 1 NOT NAMED | 13.3        | 81.6 | 35   | 0   |   |
| 1916 | 6 30 | 12 | 1 NOT NAMED | 13.8        | 81.8 | 35   | 0   |   |
| 1916 | 6 30 | 18 | 1 NOT NAMED | 14.3        | 82.2 | 40   | 0   |   |
| 1916 | 7    | 1  | 0           | 1 NOT NAMED | 14.8 | 82.5 | 40  | 0 |
| 1916 | 7    | 1  | 6           | 1 NOT NAMED | 15.4 | 82.9 | 45  | 0 |
| 1916 | 7    | 1  | 12          | 1 NOT NAMED | 16.1 | 83.3 | 50  | 0 |
| 1916 | 7    | 1  | 18          | 1 NOT NAMED | 16.6 | 83.7 | 55  | 0 |
| 1916 | 7    | 2  | 0           | 1 NOT NAMED | 17.0 | 83.9 | 55  | 0 |
| 1916 | 7    | 2  | 6           | 1 NOT NAMED | 17.5 | 84.1 | 60  | 0 |
| 1916 | 7    | 2  | 12          | 1 NOT NAMED | 18.0 | 84.4 | 65  | 0 |
| 1916 | 7    | 2  | 18          | 1 NOT NAMED | 18.5 | 84.6 | 70  | 0 |
| 1916 | 7    | 3  | 0           | 1 NOT NAMED | 18.9 | 84.8 | 70  | 0 |
| 1916 | 7    | 3  | 6           | 1 NOT NAMED | 19.4 | 85.0 | 75  | 0 |

|      |   |    |    |   |           |      |      |     |     |
|------|---|----|----|---|-----------|------|------|-----|-----|
| 1916 | 7 | 3  | 12 | 1 | NOT NAMED | 20.0 | 85.3 | 80  | 0   |
| 1916 | 7 | 3  | 18 | 1 | NOT NAMED | 20.9 | 85.6 | 85  | 0   |
| 1916 | 7 | 4  | 0  | 1 | NOT NAMED | 21.9 | 86.0 | 90  | 0   |
| 1916 | 7 | 4  | 6  | 1 | NOT NAMED | 23.1 | 86.4 | 95  | 0   |
| 1916 | 7 | 4  | 12 | 1 | NOT NAMED | 24.1 | 86.7 | 95  | 0   |
| 1916 | 7 | 4  | 18 | 1 | NOT NAMED | 25.3 | 87.0 | 100 | 0   |
| 1916 | 7 | 5  | 0  | 1 | NOT NAMED | 26.4 | 87.4 | 100 | 0   |
| 1916 | 7 | 5  | 6  | 1 | NOT NAMED | 27.5 | 87.7 | 105 | 0   |
| 1916 | 7 | 5  | 12 | 1 | NOT NAMED | 28.5 | 88.0 | 105 | 0   |
| 1916 | 7 | 5  | 18 | 1 | NOT NAMED | 29.6 | 88.4 | 105 | 0   |
| 1916 | 7 | 6  | 0  | 1 | NOT NAMED | 30.5 | 89.0 | 90  | 979 |
| 1916 | 7 | 6  | 6  | 1 | NOT NAMED | 31.3 | 89.5 | 60  | 0   |
| 1916 | 7 | 6  | 12 | 1 | NOT NAMED | 32.1 | 90.0 | 50  | 0   |
| 1916 | 7 | 6  | 18 | 1 | NOT NAMED | 32.7 | 90.1 | 40  | 0   |
| 1916 | 7 | 7  | 0  | 1 | NOT NAMED | 33.2 | 90.2 | 40  | 0   |
| 1916 | 7 | 7  | 6  | 1 | NOT NAMED | 33.5 | 90.2 | 40  | 0   |
| 1916 | 7 | 7  | 12 | 1 | NOT NAMED | 33.7 | 90.1 | 40  | 0   |
| 1916 | 7 | 7  | 18 | 1 | NOT NAMED | 33.9 | 89.4 | 40  | 0   |
| 1916 | 7 | 8  | 0  | 1 | NOT NAMED | 33.7 | 88.5 | 40  | 0   |
| 1916 | 7 | 8  | 6  | 1 | NOT NAMED | 33.6 | 87.6 | 30  | 0   |
| 1916 | 7 | 8  | 12 | 1 | NOT NAMED | 33.8 | 86.9 | 30  | 0   |
| 1916 | 7 | 8  | 18 | 1 | NOT NAMED | 33.9 | 86.6 | 30  | 0   |
| 1916 | 7 | 9  | 0  | 1 | NOT NAMED | 34.0 | 86.4 | 25  | 0   |
| 1916 | 7 | 9  | 6  | 1 | NOT NAMED | 34.2 | 86.2 | 25  | 0   |
| 1916 | 7 | 9  | 12 | 1 | NOT NAMED | 34.5 | 86.0 | 20  | 0   |
| 1916 | 7 | 9  | 18 | 1 | NOT NAMED | 34.8 | 85.9 | 20  | 0   |
| 1916 | 7 | 10 | 0  | 1 | NOT NAMED | 35.1 | 85.8 | 20  | 0   |
| 1916 | 7 | 10 | 6  | 1 | NOT NAMED | 35.4 | 85.7 | 20  | 0   |
| 1916 | 7 | 10 | 12 | 1 | NOT NAMED | 35.8 | 85.6 | 20  | 0   |
| 1916 | 7 | 10 | 18 | 1 | NOT NAMED | 36.2 | 85.8 | 20  | 0   |
| 1916 | 7 | 10 | 6  | 2 | NOT NAMED | 12.0 | 52.1 | 35  | 0   |
| 1916 | 7 | 10 | 12 | 2 | NOT NAMED | 12.1 | 53.2 | 35  | 0   |
| 1916 | 7 | 10 | 18 | 2 | NOT NAMED | 12.4 | 54.4 | 35  | 0   |
| 1916 | 7 | 11 | 0  | 2 | NOT NAMED | 12.6 | 55.6 | 35  | 0   |
| 1916 | 7 | 11 | 6  | 2 | NOT NAMED | 12.8 | 56.7 | 35  | 0   |
| 1916 | 7 | 11 | 12 | 2 | NOT NAMED | 13.0 | 57.8 | 35  | 0   |
| 1916 | 7 | 11 | 18 | 2 | NOT NAMED | 13.6 | 58.7 | 35  | 0   |
| 1916 | 7 | 12 | 0  | 2 | NOT NAMED | 14.5 | 59.8 | 35  | 0   |
| 1916 | 7 | 12 | 6  | 2 | NOT NAMED | 15.3 | 60.8 | 35  | 0   |
| 1916 | 7 | 12 | 12 | 2 | NOT NAMED | 16.0 | 61.7 | 35  | 0   |
| 1916 | 7 | 12 | 18 | 2 | NOT NAMED | 16.5 | 62.6 | 35  | 0   |
| 1916 | 7 | 13 | 0  | 2 | NOT NAMED | 17.3 | 63.5 | 35  | 0   |
| 1916 | 7 | 13 | 6  | 2 | NOT NAMED | 17.9 | 64.3 | 40  | 0   |
| 1916 | 7 | 13 | 12 | 2 | NOT NAMED | 18.4 | 65.1 | 45  | 0   |

|      |         |             |      |      |     |   |
|------|---------|-------------|------|------|-----|---|
| 1916 | 7 13 18 | 2 NOT NAMED | 18.8 | 65.7 | 45  | 0 |
| 1916 | 7 14 0  | 2 NOT NAMED | 19.1 | 66.1 | 50  | 0 |
| 1916 | 7 14 6  | 2 NOT NAMED | 19.4 | 66.6 | 50  | 0 |
| 1916 | 7 14 12 | 2 NOT NAMED | 19.8 | 67.2 | 55  | 0 |
| 1916 | 7 14 18 | 2 NOT NAMED | 20.3 | 67.5 | 60  | 0 |
| 1916 | 7 15 0  | 2 NOT NAMED | 20.8 | 67.9 | 65  | 0 |
| 1916 | 7 15 6  | 2 NOT NAMED | 21.2 | 68.3 | 70  | 0 |
| 1916 | 7 15 12 | 2 NOT NAMED | 21.7 | 68.7 | 75  | 0 |
| 1916 | 7 15 18 | 2 NOT NAMED | 22.2 | 69.0 | 75  | 0 |
| 1916 | 7 16 0  | 2 NOT NAMED | 22.7 | 69.4 | 80  | 0 |
| 1916 | 7 16 6  | 2 NOT NAMED | 23.1 | 69.7 | 85  | 0 |
| 1916 | 7 16 12 | 2 NOT NAMED | 23.8 | 70.0 | 90  | 0 |
| 1916 | 7 16 18 | 2 NOT NAMED | 24.3 | 70.4 | 90  | 0 |
| 1916 | 7 17 0  | 2 NOT NAMED | 24.7 | 70.7 | 95  | 0 |
| 1916 | 7 17 6  | 2 NOT NAMED | 25.3 | 71.1 | 95  | 0 |
| 1916 | 7 17 12 | 2 NOT NAMED | 26.0 | 71.5 | 100 | 0 |
| 1916 | 7 17 18 | 2 NOT NAMED | 26.8 | 71.9 | 100 | 0 |
| 1916 | 7 18 0  | 2 NOT NAMED | 27.6 | 72.3 | 105 | 0 |
| 1916 | 7 18 6  | 2 NOT NAMED | 28.3 | 72.6 | 105 | 0 |
| 1916 | 7 18 12 | 2 NOT NAMED | 29.1 | 72.8 | 105 | 0 |
| 1916 | 7 18 18 | 2 NOT NAMED | 30.0 | 73.1 | 105 | 0 |
| 1916 | 7 19 0  | 2 NOT NAMED | 30.9 | 73.2 | 100 | 0 |
| 1916 | 7 19 6  | 2 NOT NAMED | 31.8 | 73.3 | 100 | 0 |
| 1916 | 7 19 12 | 2 NOT NAMED | 32.8 | 73.3 | 95  | 0 |
| 1916 | 7 19 18 | 2 NOT NAMED | 33.8 | 73.2 | 95  | 0 |
| 1916 | 7 20 0  | 2 NOT NAMED | 34.7 | 73.1 | 90  | 0 |
| 1916 | 7 20 6  | 2 NOT NAMED | 35.6 | 73.0 | 90  | 0 |
| 1916 | 7 20 12 | 2 NOT NAMED | 36.6 | 72.8 | 90  | 0 |
| 1916 | 7 20 18 | 2 NOT NAMED | 37.6 | 72.5 | 85  | 0 |
| 1916 | 7 21 0  | 2 NOT NAMED | 38.8 | 72.0 | 85  | 0 |
| 1916 | 7 21 6  | 2 NOT NAMED | 39.9 | 71.4 | 80  | 0 |
| 1916 | 7 21 12 | 2 NOT NAMED | 41.1 | 70.9 | 75  | 0 |
| 1916 | 7 21 18 | 2 NOT NAMED | 42.5 | 70.1 | 65  | 0 |
| 1916 | 7 22 0  | 2 NOT NAMED | 44.7 | 68.7 | 55  | 0 |
| 1916 | 7 22 6  | 2 NOT NAMED | 46.9 | 66.2 | 45  | 0 |
| 1916 | 7 22 12 | 2 NOT NAMED | 48.5 | 62.6 | 35  | 0 |
| 1916 | 7 22 18 | 2 NOT NAMED | 51.0 | 55.5 | 30  | 0 |
| 1916 | 7 11 6  | 3 NOT NAMED | 25.3 | 72.4 | 40  | 0 |
| 1916 | 7 11 12 | 3 NOT NAMED | 25.6 | 73.5 | 40  | 0 |
| 1916 | 7 11 18 | 3 NOT NAMED | 26.1 | 74.3 | 45  | 0 |
| 1916 | 7 12 0  | 3 NOT NAMED | 26.5 | 75.0 | 50  | 0 |
| 1916 | 7 12 6  | 3 NOT NAMED | 27.0 | 75.7 | 60  | 0 |
| 1916 | 7 12 12 | 3 NOT NAMED | 27.7 | 76.3 | 60  | 0 |
| 1916 | 7 12 18 | 3 NOT NAMED | 28.4 | 76.8 | 70  | 0 |



|      |   |    |    |             |      |       |     |     |
|------|---|----|----|-------------|------|-------|-----|-----|
| 1916 | 7 | 13 | 0  | 3 NOT NAMED | 29.0 | 77.2  | 75  | 0   |
| 1916 | 7 | 13 | 6  | 3 NOT NAMED | 29.6 | 77.6  | 80  | 0   |
| 1916 | 7 | 13 | 12 | 3 NOT NAMED | 30.2 | 77.9  | 85  | 0   |
| 1916 | 7 | 13 | 18 | 3 NOT NAMED | 30.9 | 78.2  | 85  | 0   |
| 1916 | 7 | 14 | 0  | 3 NOT NAMED | 31.6 | 78.6  | 85  | 0   |
| 1916 | 7 | 14 | 6  | 3 NOT NAMED | 32.4 | 79.0  | 75  | 0   |
| 1916 | 7 | 14 | 12 | 3 NOT NAMED | 33.0 | 79.7  | 60  | 983 |
| 1916 | 7 | 14 | 18 | 3 NOT NAMED | 33.6 | 80.3  | 55  | 0   |
| 1916 | 7 | 15 | 0  | 3 NOT NAMED | 34.3 | 81.3  | 50  | 0   |
| 1916 | 7 | 15 | 6  | 3 NOT NAMED | 34.8 | 82.0  | 45  | 0   |
| 1916 | 7 | 15 | 12 | 3 NOT NAMED | 35.2 | 83.0  | 30  | 0   |
| 1916 | 8 | 12 | 6  | 4 NOT NAMED | 14.0 | 55.0  | 60  | 0   |
| 1916 | 8 | 12 | 12 | 4 NOT NAMED | 14.0 | 56.4  | 60  | 0   |
| 1916 | 8 | 12 | 18 | 4 NOT NAMED | 14.0 | 57.9  | 70  | 0   |
| 1916 | 8 | 13 | 0  | 4 NOT NAMED | 14.1 | 59.4  | 75  | 0   |
| 1916 | 8 | 13 | 6  | 4 NOT NAMED | 14.2 | 61.0  | 75  | 0   |
| 1916 | 8 | 13 | 12 | 4 NOT NAMED | 14.3 | 62.5  | 80  | 0   |
| 1916 | 8 | 13 | 18 | 4 NOT NAMED | 14.3 | 64.1  | 80  | 0   |
| 1916 | 8 | 14 | 0  | 4 NOT NAMED | 14.5 | 65.7  | 85  | 0   |
| 1916 | 8 | 14 | 6  | 4 NOT NAMED | 14.7 | 67.4  | 85  | 0   |
| 1916 | 8 | 14 | 12 | 4 NOT NAMED | 15.0 | 69.0  | 85  | 0   |
| 1916 | 8 | 14 | 18 | 4 NOT NAMED | 15.3 | 70.4  | 85  | 0   |
| 1916 | 8 | 15 | 0  | 4 NOT NAMED | 15.6 | 71.5  | 85  | 0   |
| 1916 | 8 | 15 | 6  | 4 NOT NAMED | 16.1 | 72.8  | 85  | 0   |
| 1916 | 8 | 15 | 12 | 4 NOT NAMED | 16.5 | 74.0  | 90  | 0   |
| 1916 | 8 | 15 | 18 | 4 NOT NAMED | 17.3 | 75.6  | 90  | 0   |
| 1916 | 8 | 16 | 0  | 4 NOT NAMED | 18.0 | 77.1  | 95  | 0   |
| 1916 | 8 | 16 | 6  | 4 NOT NAMED | 18.7 | 79.0  | 95  | 0   |
| 1916 | 8 | 16 | 12 | 4 NOT NAMED | 19.4 | 80.7  | 95  | 0   |
| 1916 | 8 | 16 | 18 | 4 NOT NAMED | 19.9 | 82.3  | 100 | 0   |
| 1916 | 8 | 17 | 0  | 4 NOT NAMED | 20.4 | 83.8  | 100 | 0   |
| 1916 | 8 | 17 | 6  | 4 NOT NAMED | 20.9 | 85.4  | 105 | 0   |
| 1916 | 8 | 17 | 12 | 4 NOT NAMED | 21.8 | 87.1  | 105 | 0   |
| 1916 | 8 | 17 | 18 | 4 NOT NAMED | 22.5 | 88.7  | 105 | 0   |
| 1916 | 8 | 18 | 0  | 4 NOT NAMED | 23.1 | 90.2  | 110 | 0   |
| 1916 | 8 | 18 | 6  | 4 NOT NAMED | 24.0 | 92.0  | 110 | 0   |
| 1916 | 8 | 18 | 12 | 4 NOT NAMED | 25.3 | 94.7  | 110 | 948 |
| 1916 | 8 | 18 | 18 | 4 NOT NAMED | 26.2 | 96.4  | 100 | 0   |
| 1916 | 8 | 19 | 0  | 4 NOT NAMED | 27.1 | 98.0  | 65  | 0   |
| 1916 | 8 | 19 | 6  | 4 NOT NAMED | 27.9 | 99.6  | 50  | 0   |
| 1916 | 8 | 19 | 12 | 4 NOT NAMED | 29.1 | 100.9 | 35  | 0   |
| 1916 | 8 | 19 | 18 | 4 NOT NAMED | 31.2 | 101.4 | 30  | 0   |
| 1916 | 8 | 21 | 6  | 5 NOT NAMED | 18.0 | 61.0  | 55  | 0   |
| 1916 | 8 | 21 | 12 | 5 NOT NAMED | 18.0 | 62.5  | 65  | 0   |

|      |         |             |      |      |    |     |
|------|---------|-------------|------|------|----|-----|
| 1916 | 8 21 18 | 5 NOT NAMED | 18.1 | 63.2 | 75 | 0   |
| 1916 | 8 22 0  | 5 NOT NAMED | 18.2 | 64.1 | 85 | 988 |
| 1916 | 8 22 6  | 5 NOT NAMED | 18.2 | 65.3 | 80 | 0   |
| 1916 | 8 22 12 | 5 NOT NAMED | 18.2 | 66.5 | 70 | 0   |
| 1916 | 8 22 18 | 5 NOT NAMED | 18.5 | 68.0 | 65 | 0   |
| 1916 | 8 23 0  | 5 NOT NAMED | 18.8 | 69.7 | 60 | 0   |
| 1916 | 8 23 6  | 5 NOT NAMED | 19.2 | 71.2 | 55 | 0   |
| 1916 | 8 23 12 | 5 NOT NAMED | 19.5 | 72.9 | 45 | 0   |
| 1916 | 8 23 18 | 5 NOT NAMED | 20.0 | 74.6 | 45 | 0   |
| 1916 | 8 24 0  | 5 NOT NAMED | 21.0 | 76.3 | 40 | 0   |
| 1916 | 8 24 6  | 5 NOT NAMED | 21.7 | 77.6 | 40 | 0   |
| 1916 | 8 24 12 | 5 NOT NAMED | 22.5 | 78.5 | 35 | 0   |
| 1916 | 8 24 18 | 5 NOT NAMED | 23.2 | 79.0 | 35 | 0   |
| 1916 | 8 25 0  | 5 NOT NAMED | 23.8 | 79.3 | 35 | 0   |
| 1916 | 8 25 6  | 5 NOT NAMED | 24.5 | 79.6 | 30 | 0   |
| 1916 | 8 25 12 | 5 NOT NAMED | 25.2 | 79.8 | 30 | 0   |
| 1916 | 8 25 18 | 5 NOT NAMED | 26.1 | 79.8 | 30 | 0   |
| 1916 | 8 27 6  | 6 NOT NAMED | 14.0 | 46.3 | 60 | 0   |
| 1916 | 8 27 12 | 6 NOT NAMED | 14.0 | 48.5 | 60 | 0   |
| 1916 | 8 27 18 | 6 NOT NAMED | 14.3 | 51.2 | 65 | 0   |
| 1916 | 8 28 0  | 6 NOT NAMED | 14.7 | 53.5 | 65 | 0   |
| 1916 | 8 28 6  | 6 NOT NAMED | 15.1 | 56.0 | 70 | 0   |
| 1916 | 8 28 12 | 6 NOT NAMED | 15.3 | 58.5 | 75 | 0   |
| 1916 | 8 28 18 | 6 NOT NAMED | 15.4 | 60.5 | 75 | 0   |
| 1916 | 8 29 0  | 6 NOT NAMED | 15.5 | 62.8 | 80 | 989 |
| 1916 | 8 29 6  | 6 NOT NAMED | 15.6 | 65.1 | 85 | 0   |
| 1916 | 8 29 12 | 6 NOT NAMED | 15.6 | 67.6 | 85 | 0   |
| 1916 | 8 29 18 | 6 NOT NAMED | 15.7 | 69.2 | 85 | 0   |
| 1916 | 8 30 0  | 6 NOT NAMED | 15.9 | 71.3 | 85 | 0   |
| 1916 | 8 30 6  | 6 NOT NAMED | 16.0 | 73.1 | 85 | 0   |
| 1916 | 8 30 12 | 6 NOT NAMED | 16.2 | 75.1 | 85 | 0   |
| 1916 | 8 30 18 | 6 NOT NAMED | 16.6 | 76.7 | 85 | 0   |
| 1916 | 8 31 0  | 6 NOT NAMED | 16.8 | 78.2 | 85 | 0   |
| 1916 | 8 31 6  | 6 NOT NAMED | 17.0 | 79.6 | 85 | 0   |
| 1916 | 8 31 12 | 6 NOT NAMED | 17.4 | 81.0 | 80 | 0   |
| 1916 | 8 31 18 | 6 NOT NAMED | 17.7 | 82.0 | 80 | 0   |
| 1916 | 9 1 0   | 6 NOT NAMED | 18.0 | 83.2 | 75 | 0   |
| 1916 | 9 1 6   | 6 NOT NAMED | 18.1 | 84.1 | 75 | 0   |
| 1916 | 9 1 12  | 6 NOT NAMED | 18.2 | 85.3 | 70 | 0   |
| 1916 | 9 1 18  | 6 NOT NAMED | 18.2 | 86.4 | 70 | 0   |
| 1916 | 9 2 0   | 6 NOT NAMED | 18.1 | 87.6 | 65 | 0   |
| 1916 | 9 2 6   | 6 NOT NAMED | 17.9 | 89.3 | 55 | 0   |
| 1916 | 9 2 12  | 6 NOT NAMED | 17.0 | 91.0 | 30 | 0   |
| 1916 | 9 4 12  | 7 NOT NAMED | 24.2 | 74.8 | 35 | 0   |

|      |   |    |    |             |      |      |    |   |
|------|---|----|----|-------------|------|------|----|---|
| 1916 | 9 | 4  | 18 | 7 NOT NAMED | 25.9 | 75.8 | 35 | 0 |
| 1916 | 9 | 5  | 0  | 7 NOT NAMED | 27.5 | 76.7 | 35 | 0 |
| 1916 | 9 | 5  | 6  | 7 NOT NAMED | 29.0 | 77.3 | 35 | 0 |
| 1916 | 9 | 5  | 12 | 7 NOT NAMED | 30.5 | 77.9 | 35 | 0 |
| 1916 | 9 | 5  | 18 | 7 NOT NAMED | 31.9 | 78.3 | 35 | 0 |
| 1916 | 9 | 6  | 0  | 7 NOT NAMED | 33.3 | 78.3 | 35 | 0 |
| 1916 | 9 | 6  | 6  | 7 NOT NAMED | 34.7 | 78.2 | 35 | 0 |
| 1916 | 9 | 6  | 12 | 7 NOT NAMED | 36.0 | 78.1 | 25 | 0 |
| 1916 | 9 | 9  | 6  | 8 NOT NAMED | 18.8 | 57.0 | 35 | 0 |
| 1916 | 9 | 9  | 12 | 8 NOT NAMED | 19.0 | 58.3 | 35 | 0 |
| 1916 | 9 | 9  | 18 | 8 NOT NAMED | 19.3 | 59.8 | 35 | 0 |
| 1916 | 9 | 10 | 0  | 8 NOT NAMED | 19.7 | 61.3 | 35 | 0 |
| 1916 | 9 | 10 | 6  | 8 NOT NAMED | 20.2 | 62.7 | 35 | 0 |
| 1916 | 9 | 10 | 12 | 8 NOT NAMED | 20.6 | 64.2 | 35 | 0 |
| 1916 | 9 | 10 | 18 | 8 NOT NAMED | 21.2 | 65.9 | 35 | 0 |
| 1916 | 9 | 11 | 0  | 8 NOT NAMED | 21.6 | 67.1 | 40 | 0 |
| 1916 | 9 | 11 | 6  | 8 NOT NAMED | 22.1 | 68.5 | 40 | 0 |
| 1916 | 9 | 11 | 12 | 8 NOT NAMED | 22.7 | 70.0 | 45 | 0 |
| 1916 | 9 | 11 | 18 | 8 NOT NAMED | 23.1 | 71.5 | 45 | 0 |
| 1916 | 9 | 12 | 0  | 8 NOT NAMED | 23.6 | 73.0 | 45 | 0 |
| 1916 | 9 | 12 | 6  | 8 NOT NAMED | 24.0 | 74.5 | 45 | 0 |
| 1916 | 9 | 12 | 12 | 8 NOT NAMED | 25.1 | 75.9 | 45 | 0 |
| 1916 | 9 | 12 | 18 | 8 NOT NAMED | 26.3 | 77.0 | 45 | 0 |
| 1916 | 9 | 13 | 0  | 8 NOT NAMED | 27.4 | 78.3 | 40 | 0 |
| 1916 | 9 | 13 | 6  | 8 NOT NAMED | 28.3 | 79.8 | 40 | 0 |
| 1916 | 9 | 13 | 12 | 8 NOT NAMED | 29.3 | 81.6 | 30 | 0 |
| 1916 | 9 | 13 | 18 | 8 NOT NAMED | 29.7 | 82.8 | 30 | 0 |
| 1916 | 9 | 14 | 0  | 8 NOT NAMED | 30.1 | 83.9 | 25 | 0 |
| 1916 | 9 | 14 | 6  | 8 NOT NAMED | 30.8 | 84.9 | 20 | 0 |
| 1916 | 9 | 14 | 12 | 8 NOT NAMED | 31.5 | 85.8 | 20 | 0 |
| 1916 | 9 | 14 | 18 | 8 NOT NAMED | 32.2 | 84.9 | 20 | 0 |
| 1916 | 9 | 14 | 6  | 9 NOT NAMED | 21.1 | 59.7 | 35 | 0 |
| 1916 | 9 | 14 | 12 | 9 NOT NAMED | 21.3 | 60.7 | 35 | 0 |
| 1916 | 9 | 14 | 18 | 9 NOT NAMED | 21.4 | 61.6 | 35 | 0 |
| 1916 | 9 | 15 | 0  | 9 NOT NAMED | 21.5 | 62.3 | 35 | 0 |
| 1916 | 9 | 15 | 6  | 9 NOT NAMED | 21.8 | 63.0 | 40 | 0 |
| 1916 | 9 | 15 | 12 | 9 NOT NAMED | 22.4 | 63.7 | 40 | 0 |
| 1916 | 9 | 15 | 18 | 9 NOT NAMED | 23.1 | 63.7 | 45 | 0 |
| 1916 | 9 | 16 | 0  | 9 NOT NAMED | 23.6 | 63.5 | 45 | 0 |
| 1916 | 9 | 16 | 6  | 9 NOT NAMED | 24.1 | 63.3 | 50 | 0 |
| 1916 | 9 | 16 | 12 | 9 NOT NAMED | 24.8 | 63.0 | 55 | 0 |
| 1916 | 9 | 16 | 18 | 9 NOT NAMED | 26.0 | 62.6 | 55 | 0 |
| 1916 | 9 | 17 | 0  | 9 NOT NAMED | 27.2 | 62.0 | 60 | 0 |
| 1916 | 9 | 17 | 6  | 9 NOT NAMED | 28.5 | 61.1 | 60 | 0 |

|      |            |             |      |      |     |   |
|------|------------|-------------|------|------|-----|---|
| 1916 | 9 17 12    | 9 NOT NAMED | 29.7 | 59.8 | 65  | 0 |
| 1916 | 9 17 18    | 9 NOT NAMED | 30.9 | 58.9 | 70  | 0 |
| 1916 | 9 18 0     | 9 NOT NAMED | 32.1 | 58.0 | 75  | 0 |
| 1916 | 9 18 6     | 9 NOT NAMED | 33.1 | 57.1 | 80  | 0 |
| 1916 | 9 18 12    | 9 NOT NAMED | 34.2 | 55.9 | 85  | 0 |
| 1916 | 9 18 18    | 9 NOT NAMED | 35.1 | 54.6 | 90  | 0 |
| 1916 | 9 19 0     | 9 NOT NAMED | 35.9 | 53.2 | 90  | 0 |
| 1916 | 9 19 6     | 9 NOT NAMED | 36.5 | 51.9 | 85  | 0 |
| 1916 | 9 19 12    | 9 NOT NAMED | 37.0 | 50.5 | 80  | 0 |
| 1916 | 9 19 18    | 9 NOT NAMED | 37.6 | 49.1 | 70  | 0 |
| 1916 | 9 20 0     | 9 NOT NAMED | 38.0 | 47.7 | 70  | 0 |
| 1916 | 9 20 6     | 9 NOT NAMED | 38.3 | 46.4 | 70  | 0 |
| 1916 | 9 20 12    | 9 NOT NAMED | 38.6 | 45.0 | 65  | 0 |
| 1916 | 9 20 18    | 9 NOT NAMED | 38.8 | 43.7 | 65  | 0 |
| 1916 | 9 21 0     | 9 NOT NAMED | 39.0 | 42.4 | 55  | 0 |
| 1916 | 9 21 6     | 9 NOT NAMED | 39.1 | 41.2 | 45  | 0 |
| 1916 | 9 21 12    | 9 NOT NAMED | 39.2 | 40.0 | 35  | 0 |
| 1916 | 9 21 18    | 9 NOT NAMED | 39.2 | 37.0 | 25  | 0 |
| 1916 | 9 17 12 10 | NOT NAMED   | 13.0 | 45.5 | 35  | 0 |
| 1916 | 9 17 18 10 | NOT NAMED   | 13.5 | 46.7 | 35  | 0 |
| 1916 | 9 18 0 10  | NOT NAMED   | 14.0 | 47.7 | 40  | 0 |
| 1916 | 9 18 6 10  | NOT NAMED   | 14.5 | 48.8 | 45  | 0 |
| 1916 | 9 18 12 10 | NOT NAMED   | 15.0 | 50.0 | 50  | 0 |
| 1916 | 9 18 18 10 | NOT NAMED   | 15.5 | 51.3 | 50  | 0 |
| 1916 | 9 19 0 10  | NOT NAMED   | 16.0 | 52.5 | 60  | 0 |
| 1916 | 9 19 6 10  | NOT NAMED   | 16.5 | 53.8 | 65  | 0 |
| 1916 | 9 19 12 10 | NOT NAMED   | 17.0 | 55.0 | 75  | 0 |
| 1916 | 9 19 18 10 | NOT NAMED   | 17.3 | 56.3 | 80  | 0 |
| 1916 | 9 20 0 10  | NOT NAMED   | 17.5 | 57.5 | 85  | 0 |
| 1916 | 9 20 6 10  | NOT NAMED   | 17.7 | 58.8 | 90  | 0 |
| 1916 | 9 20 12 10 | NOT NAMED   | 18.0 | 60.0 | 95  | 0 |
| 1916 | 9 20 18 10 | NOT NAMED   | 18.7 | 60.8 | 95  | 0 |
| 1916 | 9 21 0 10  | NOT NAMED   | 19.4 | 61.7 | 95  | 0 |
| 1916 | 9 21 6 10  | NOT NAMED   | 20.2 | 62.4 | 100 | 0 |
| 1916 | 9 21 12 10 | NOT NAMED   | 21.0 | 63.2 | 100 | 0 |
| 1916 | 9 21 18 10 | NOT NAMED   | 22.1 | 64.2 | 105 | 0 |
| 1916 | 9 22 0 10  | NOT NAMED   | 23.3 | 65.3 | 105 | 0 |
| 1916 | 9 22 6 10  | NOT NAMED   | 24.5 | 66.5 | 105 | 0 |
| 1916 | 9 22 12 10 | NOT NAMED   | 25.8 | 67.5 | 105 | 0 |
| 1916 | 9 22 18 10 | NOT NAMED   | 27.1 | 68.2 | 105 | 0 |
| 1916 | 9 23 0 10  | NOT NAMED   | 28.4 | 68.5 | 100 | 0 |
| 1916 | 9 23 6 10  | NOT NAMED   | 29.7 | 68.5 | 100 | 0 |
| 1916 | 9 23 12 10 | NOT NAMED   | 30.9 | 68.2 | 95  | 0 |
| 1916 | 9 23 18 10 | NOT NAMED   | 32.5 | 67.0 | 95  | 0 |

|      |    |    |    |    |           |      |      |     |     |
|------|----|----|----|----|-----------|------|------|-----|-----|
| 1916 | 9  | 24 | 0  | 10 | NOT NAMED | 33.9 | 65.2 | 90  | 0   |
| 1916 | 9  | 24 | 6  | 10 | NOT NAMED | 35.4 | 63.8 | 90  | 0   |
| 1916 | 9  | 24 | 12 | 10 | NOT NAMED | 36.9 | 62.3 | 85  | 0   |
| 1916 | 9  | 24 | 18 | 10 | NOT NAMED | 39.5 | 60.5 | 85  | 0   |
| 1916 | 9  | 25 | 0  | 10 | NOT NAMED | 43.0 | 57.8 | 80  | 0   |
| 1916 | 10 | 2  | 6  | 11 | NOT NAMED | 26.5 | 72.2 | 40  | 0   |
| 1916 | 10 | 2  | 12 | 11 | NOT NAMED | 27.1 | 72.9 | 40  | 0   |
| 1916 | 10 | 2  | 18 | 11 | NOT NAMED | 27.6 | 73.5 | 40  | 0   |
| 1916 | 10 | 3  | 0  | 11 | NOT NAMED | 28.2 | 74.2 | 40  | 0   |
| 1916 | 10 | 3  | 6  | 11 | NOT NAMED | 28.6 | 74.8 | 40  | 0   |
| 1916 | 10 | 3  | 12 | 11 | NOT NAMED | 29.1 | 75.5 | 40  | 0   |
| 1916 | 10 | 3  | 18 | 11 | NOT NAMED | 29.6 | 76.2 | 40  | 0   |
| 1916 | 10 | 4  | 0  | 11 | NOT NAMED | 30.2 | 77.0 | 40  | 0   |
| 1916 | 10 | 4  | 6  | 11 | NOT NAMED | 30.7 | 77.8 | 40  | 0   |
| 1916 | 10 | 4  | 12 | 11 | NOT NAMED | 31.3 | 78.7 | 40  | 0   |
| 1916 | 10 | 4  | 18 | 11 | NOT NAMED | 31.8 | 80.1 | 30  | 0   |
| 1916 | 10 | 6  | 6  | 12 | NOT NAMED | 11.5 | 58.3 | 35  | 0   |
| 1916 | 10 | 6  | 12 | 12 | NOT NAMED | 12.1 | 58.9 | 35  | 0   |
| 1916 | 10 | 6  | 18 | 12 | NOT NAMED | 12.3 | 59.4 | 35  | 0   |
| 1916 | 10 | 7  | 0  | 12 | NOT NAMED | 12.5 | 59.9 | 35  | 0   |
| 1916 | 10 | 7  | 6  | 12 | NOT NAMED | 12.8 | 60.4 | 35  | 0   |
| 1916 | 10 | 7  | 12 | 12 | NOT NAMED | 13.0 | 61.0 | 35  | 0   |
| 1916 | 10 | 7  | 18 | 12 | NOT NAMED | 13.4 | 61.7 | 35  | 0   |
| 1916 | 10 | 8  | 0  | 12 | NOT NAMED | 13.7 | 62.3 | 35  | 0   |
| 1916 | 10 | 8  | 6  | 12 | NOT NAMED | 14.2 | 62.8 | 40  | 0   |
| 1916 | 10 | 8  | 12 | 12 | NOT NAMED | 14.8 | 63.4 | 45  | 0   |
| 1916 | 10 | 8  | 18 | 12 | NOT NAMED | 15.4 | 63.8 | 45  | 0   |
| 1916 | 10 | 9  | 0  | 12 | NOT NAMED | 15.9 | 64.0 | 50  | 0   |
| 1916 | 10 | 9  | 6  | 12 | NOT NAMED | 16.4 | 64.3 | 55  | 0   |
| 1916 | 10 | 9  | 12 | 12 | NOT NAMED | 17.1 | 64.5 | 60  | 0   |
| 1916 | 10 | 9  | 18 | 12 | NOT NAMED | 18.0 | 64.8 | 85  | 970 |
| 1916 | 10 | 10 | 0  | 12 | NOT NAMED | 19.0 | 64.9 | 90  | 0   |
| 1916 | 10 | 10 | 6  | 12 | NOT NAMED | 19.9 | 64.9 | 90  | 0   |
| 1916 | 10 | 10 | 12 | 12 | NOT NAMED | 20.9 | 64.7 | 85  | 0   |
| 1916 | 10 | 10 | 18 | 12 | NOT NAMED | 21.9 | 64.3 | 85  | 0   |
| 1916 | 10 | 11 | 0  | 12 | NOT NAMED | 22.7 | 64.0 | 85  | 0   |
| 1916 | 10 | 11 | 6  | 12 | NOT NAMED | 23.8 | 63.6 | 90  | 0   |
| 1916 | 10 | 11 | 12 | 12 | NOT NAMED | 24.8 | 63.0 | 90  | 0   |
| 1916 | 10 | 11 | 18 | 12 | NOT NAMED | 25.7 | 62.5 | 95  | 0   |
| 1916 | 10 | 12 | 0  | 12 | NOT NAMED | 26.4 | 62.1 | 95  | 0   |
| 1916 | 10 | 12 | 6  | 12 | NOT NAMED | 27.1 | 61.7 | 100 | 0   |
| 1916 | 10 | 12 | 12 | 12 | NOT NAMED | 27.9 | 61.0 | 105 | 0   |
| 1916 | 10 | 12 | 18 | 12 | NOT NAMED | 28.5 | 60.0 | 105 | 0   |
| 1916 | 10 | 13 | 0  | 12 | NOT NAMED | 29.1 | 58.0 | 100 | 0   |

|            |       |           |      |      |     |     |
|------------|-------|-----------|------|------|-----|-----|
| 1916 10 13 | 6 12  | NOT NAMED | 29.9 | 56.2 | 90  | 0   |
| 1916 10 13 | 12 12 | NOT NAMED | 30.8 | 55.0 | 80  | 0   |
| 1916 10 13 | 18 12 | NOT NAMED | 32.1 | 53.1 | 75  | 0   |
| 1916 10 14 | 0 12  | NOT NAMED | 33.5 | 51.6 | 65  | 0   |
| 1916 10 14 | 6 12  | NOT NAMED | 36.1 | 48.8 | 60  | 0   |
| 1916 10 14 | 12 12 | NOT NAMED | 39.2 | 46.0 | 55  | 0   |
| 1916 10 14 | 18 12 | NOT NAMED | 41.7 | 43.5 | 50  | 0   |
| 1916 10 15 | 0 12  | NOT NAMED | 44.4 | 41.1 | 45  | 0   |
| 1916 10 15 | 6 12  | NOT NAMED | 47.1 | 38.6 | 45  | 0   |
| 1916 10 15 | 12 12 | NOT NAMED | 50.0 | 35.6 | 40  | 0   |
| 1916 10 12 | 6 13  | NOT NAMED | 15.4 | 74.7 | 60  | 0   |
| 1916 10 12 | 12 13 | NOT NAMED | 15.5 | 75.6 | 60  | 0   |
| 1916 10 12 | 18 13 | NOT NAMED | 15.6 | 76.5 | 60  | 0   |
| 1916 10 13 | 0 13  | NOT NAMED | 15.7 | 77.4 | 70  | 0   |
| 1916 10 13 | 6 13  | NOT NAMED | 15.8 | 78.3 | 75  | 0   |
| 1916 10 13 | 12 13 | NOT NAMED | 16.0 | 79.2 | 85  | 0   |
| 1916 10 13 | 18 13 | NOT NAMED | 16.2 | 80.4 | 90  | 0   |
| 1916 10 14 | 0 13  | NOT NAMED | 16.5 | 81.3 | 90  | 0   |
| 1916 10 14 | 6 13  | NOT NAMED | 16.7 | 82.2 | 95  | 0   |
| 1916 10 14 | 12 13 | NOT NAMED | 17.0 | 83.1 | 95  | 0   |
| 1916 10 14 | 18 13 | NOT NAMED | 17.3 | 84.1 | 95  | 0   |
| 1916 10 15 | 0 13  | NOT NAMED | 17.7 | 85.1 | 95  | 0   |
| 1916 10 15 | 6 13  | NOT NAMED | 18.1 | 86.2 | 90  | 0   |
| 1916 10 15 | 12 13 | NOT NAMED | 18.6 | 87.2 | 85  | 0   |
| 1916 10 15 | 18 13 | NOT NAMED | 19.1 | 88.2 | 85  | 0   |
| 1916 10 16 | 0 13  | NOT NAMED | 19.7 | 89.0 | 85  | 0   |
| 1916 10 16 | 6 13  | NOT NAMED | 20.3 | 89.7 | 90  | 0   |
| 1916 10 16 | 12 13 | NOT NAMED | 21.0 | 90.5 | 95  | 0   |
| 1916 10 16 | 18 13 | NOT NAMED | 21.7 | 90.7 | 100 | 0   |
| 1916 10 17 | 0 13  | NOT NAMED | 22.5 | 90.8 | 100 | 0   |
| 1916 10 17 | 6 13  | NOT NAMED | 23.5 | 90.1 | 105 | 0   |
| 1916 10 17 | 12 13 | NOT NAMED | 24.0 | 89.4 | 105 | 0   |
| 1916 10 17 | 18 13 | NOT NAMED | 25.2 | 88.9 | 105 | 0   |
| 1916 10 18 | 0 13  | NOT NAMED | 26.5 | 88.5 | 105 | 0   |
| 1916 10 18 | 6 13  | NOT NAMED | 27.9 | 88.1 | 105 | 0   |
| 1916 10 18 | 12 13 | NOT NAMED | 29.6 | 87.5 | 100 | 974 |
| 1916 10 18 | 18 13 | NOT NAMED | 31.6 | 87.1 | 65  | 0   |
| 1916 10 19 | 0 13  | NOT NAMED | 33.9 | 87.4 | 55  | 0   |
| 1916 10 19 | 6 13  | NOT NAMED | 36.6 | 87.6 | 50  | 0   |
| 1916 10 19 | 12 13 | NOT NAMED | 39.5 | 86.0 | 45  | 0   |
| 1916 11 11 | 0 14  | NOT NAMED | 12.7 | 75.0 | 35  | 0   |
| 1916 11 11 | 6 14  | NOT NAMED | 12.8 | 76.3 | 35  | 0   |
| 1916 11 11 | 12 14 | NOT NAMED | 12.9 | 77.2 | 35  | 0   |
| 1916 11 11 | 18 14 | NOT NAMED | 13.0 | 78.3 | 35  | 0   |

|      |    |    |    |    |           |      |      |    |   |
|------|----|----|----|----|-----------|------|------|----|---|
| 1916 | 11 | 12 | 0  | 14 | NOT NAMED | 13.1 | 79.1 | 35 | 0 |
| 1916 | 11 | 12 | 6  | 14 | NOT NAMED | 13.3 | 79.8 | 35 | 0 |
| 1916 | 11 | 12 | 12 | 14 | NOT NAMED | 13.6 | 80.7 | 40 | 0 |
| 1916 | 11 | 12 | 18 | 14 | NOT NAMED | 14.0 | 81.7 | 40 | 0 |
| 1916 | 11 | 13 | 0  | 14 | NOT NAMED | 14.7 | 82.7 | 45 | 0 |
| 1916 | 11 | 13 | 6  | 14 | NOT NAMED | 15.9 | 83.8 | 45 | 0 |
| 1916 | 11 | 13 | 12 | 14 | NOT NAMED | 17.3 | 84.7 | 50 | 0 |
| 1916 | 11 | 13 | 18 | 14 | NOT NAMED | 18.0 | 85.3 | 50 | 0 |
| 1916 | 11 | 14 | 0  | 14 | NOT NAMED | 18.6 | 85.6 | 55 | 0 |
| 1916 | 11 | 14 | 6  | 14 | NOT NAMED | 19.3 | 85.7 | 60 | 0 |
| 1916 | 11 | 14 | 12 | 14 | NOT NAMED | 20.0 | 85.7 | 60 | 0 |
| 1916 | 11 | 14 | 18 | 14 | NOT NAMED | 20.8 | 85.7 | 60 | 0 |
| 1916 | 11 | 15 | 0  | 14 | NOT NAMED | 21.6 | 85.5 | 70 | 0 |
| 1916 | 11 | 15 | 6  | 14 | NOT NAMED | 22.3 | 85.1 | 70 | 0 |
| 1916 | 11 | 15 | 12 | 14 | NOT NAMED | 23.1 | 84.5 | 70 | 0 |
| 1916 | 11 | 15 | 18 | 14 | NOT NAMED | 24.5 | 82.0 | 70 | 0 |
| 1916 | 11 | 16 | 0  | 14 | NOT NAMED | 25.6 | 79.5 | 60 | 0 |
| 1916 | 11 | 16 | 6  | 14 | NOT NAMED | 27.0 | 77.0 | 55 | 0 |
| 1917 | 8  | 6  | 0  | 1  | NOT NAMED | 32.0 | 67.5 | 35 | 0 |
| 1917 | 8  | 6  | 6  | 1  | NOT NAMED | 32.0 | 68.0 | 35 | 0 |
| 1917 | 8  | 6  | 12 | 1  | NOT NAMED | 32.0 | 68.5 | 35 | 0 |
| 1917 | 8  | 6  | 18 | 1  | NOT NAMED | 32.0 | 69.0 | 35 | 0 |
| 1917 | 8  | 7  | 0  | 1  | NOT NAMED | 32.0 | 69.4 | 35 | 0 |
| 1917 | 8  | 7  | 6  | 1  | NOT NAMED | 32.0 | 69.9 | 35 | 0 |
| 1917 | 8  | 7  | 12 | 1  | NOT NAMED | 32.0 | 70.3 | 35 | 0 |
| 1917 | 8  | 7  | 18 | 1  | NOT NAMED | 32.0 | 70.7 | 35 | 0 |
| 1917 | 8  | 8  | 0  | 1  | NOT NAMED | 32.0 | 71.2 | 40 | 0 |
| 1917 | 8  | 8  | 6  | 1  | NOT NAMED | 32.1 | 71.6 | 40 | 0 |
| 1917 | 8  | 8  | 12 | 1  | NOT NAMED | 32.1 | 72.0 | 40 | 0 |
| 1917 | 8  | 8  | 18 | 1  | NOT NAMED | 32.3 | 72.4 | 40 | 0 |
| 1917 | 8  | 9  | 0  | 1  | NOT NAMED | 32.5 | 72.8 | 45 | 0 |
| 1917 | 8  | 9  | 6  | 1  | NOT NAMED | 32.8 | 73.2 | 45 | 0 |
| 1917 | 8  | 9  | 12 | 1  | NOT NAMED | 33.2 | 73.5 | 45 | 0 |
| 1917 | 8  | 9  | 18 | 1  | NOT NAMED | 34.1 | 73.8 | 45 | 0 |
| 1917 | 8  | 10 | 0  | 1  | NOT NAMED | 35.7 | 73.6 | 40 | 0 |
| 1917 | 8  | 10 | 6  | 1  | NOT NAMED | 37.7 | 72.6 | 40 | 0 |
| 1917 | 8  | 10 | 12 | 1  | NOT NAMED | 40.1 | 70.6 | 30 | 0 |
| 1917 | 8  | 10 | 18 | 1  | NOT NAMED | 41.8 | 68.0 | 30 | 0 |
| 1917 | 8  | 30 | 6  | 2  | NOT NAMED | 16.6 | 43.5 | 60 | 0 |
| 1917 | 8  | 30 | 12 | 2  | NOT NAMED | 17.0 | 45.2 | 60 | 0 |
| 1917 | 8  | 30 | 18 | 2  | NOT NAMED | 17.3 | 46.9 | 60 | 0 |
| 1917 | 8  | 31 | 0  | 2  | NOT NAMED | 17.6 | 48.6 | 60 | 0 |
| 1917 | 8  | 31 | 6  | 2  | NOT NAMED | 18.0 | 50.0 | 65 | 0 |
| 1917 | 8  | 31 | 12 | 2  | NOT NAMED | 18.4 | 51.3 | 70 | 0 |

|      |   |    |    |   |           |      |      |     |   |
|------|---|----|----|---|-----------|------|------|-----|---|
| 1917 | 8 | 31 | 18 | 2 | NOT NAMED | 18.7 | 52.3 | 70  | 0 |
| 1917 | 9 | 1  | 0  | 2 | NOT NAMED | 19.0 | 53.2 | 75  | 0 |
| 1917 | 9 | 1  | 6  | 2 | NOT NAMED | 19.3 | 54.0 | 80  | 0 |
| 1917 | 9 | 1  | 12 | 2 | NOT NAMED | 19.7 | 55.1 | 80  | 0 |
| 1917 | 9 | 1  | 18 | 2 | NOT NAMED | 20.2 | 56.3 | 85  | 0 |
| 1917 | 9 | 2  | 0  | 2 | NOT NAMED | 21.0 | 57.8 | 85  | 0 |
| 1917 | 9 | 2  | 6  | 2 | NOT NAMED | 21.9 | 59.2 | 90  | 0 |
| 1917 | 9 | 2  | 12 | 2 | NOT NAMED | 22.8 | 60.5 | 90  | 0 |
| 1917 | 9 | 2  | 18 | 2 | NOT NAMED | 23.6 | 61.4 | 90  | 0 |
| 1917 | 9 | 3  | 0  | 2 | NOT NAMED | 24.5 | 62.1 | 95  | 0 |
| 1917 | 9 | 3  | 6  | 2 | NOT NAMED | 25.4 | 62.7 | 95  | 0 |
| 1917 | 9 | 3  | 12 | 2 | NOT NAMED | 26.3 | 63.2 | 95  | 0 |
| 1917 | 9 | 3  | 18 | 2 | NOT NAMED | 27.3 | 63.6 | 100 | 0 |
| 1917 | 9 | 4  | 0  | 2 | NOT NAMED | 28.5 | 63.8 | 100 | 0 |
| 1917 | 9 | 4  | 6  | 2 | NOT NAMED | 29.9 | 63.6 | 105 | 0 |
| 1917 | 9 | 4  | 12 | 2 | NOT NAMED | 31.3 | 63.1 | 105 | 0 |
| 1917 | 9 | 4  | 18 | 2 | NOT NAMED | 32.5 | 62.2 | 105 | 0 |
| 1917 | 9 | 5  | 0  | 2 | NOT NAMED | 34.2 | 60.7 | 105 | 0 |
| 1917 | 9 | 5  | 6  | 2 | NOT NAMED | 36.0 | 58.5 | 100 | 0 |
| 1917 | 9 | 5  | 12 | 2 | NOT NAMED | 37.9 | 56.1 | 95  | 0 |
| 1917 | 9 | 5  | 18 | 2 | NOT NAMED | 40.7 | 53.0 | 90  | 0 |
| 1917 | 9 | 6  | 0  | 2 | NOT NAMED | 43.2 | 50.1 | 80  | 0 |
| 1917 | 9 | 6  | 6  | 2 | NOT NAMED | 46.3 | 47.6 | 70  | 0 |
| 1917 | 9 | 6  | 12 | 2 | NOT NAMED | 49.8 | 45.0 | 55  | 0 |
| 1917 | 9 | 21 | 0  | 3 | NOT NAMED | 16.0 | 60.9 | 60  | 0 |
| 1917 | 9 | 21 | 6  | 3 | NOT NAMED | 16.1 | 62.5 | 60  | 0 |
| 1917 | 9 | 21 | 12 | 3 | NOT NAMED | 16.2 | 64.4 | 65  | 0 |
| 1917 | 9 | 21 | 18 | 3 | NOT NAMED | 16.4 | 66.1 | 70  | 0 |
| 1917 | 9 | 22 | 0  | 3 | NOT NAMED | 16.5 | 67.9 | 70  | 0 |
| 1917 | 9 | 22 | 6  | 3 | NOT NAMED | 16.7 | 69.6 | 75  | 0 |
| 1917 | 9 | 22 | 12 | 3 | NOT NAMED | 16.9 | 71.6 | 80  | 0 |
| 1917 | 9 | 22 | 18 | 3 | NOT NAMED | 17.3 | 72.9 | 85  | 0 |
| 1917 | 9 | 23 | 0  | 3 | NOT NAMED | 17.7 | 74.3 | 85  | 0 |
| 1917 | 9 | 23 | 6  | 3 | NOT NAMED | 18.2 | 75.7 | 90  | 0 |
| 1917 | 9 | 23 | 12 | 3 | NOT NAMED | 18.8 | 76.9 | 90  | 0 |
| 1917 | 9 | 23 | 18 | 3 | NOT NAMED | 19.1 | 77.6 | 95  | 0 |
| 1917 | 9 | 24 | 0  | 3 | NOT NAMED | 19.4 | 78.4 | 95  | 0 |
| 1917 | 9 | 24 | 6  | 3 | NOT NAMED | 19.7 | 79.1 | 100 | 0 |
| 1917 | 9 | 24 | 12 | 3 | NOT NAMED | 20.1 | 79.9 | 100 | 0 |
| 1917 | 9 | 24 | 18 | 3 | NOT NAMED | 20.6 | 80.5 | 100 | 0 |
| 1917 | 9 | 25 | 0  | 3 | NOT NAMED | 21.0 | 81.2 | 100 | 0 |
| 1917 | 9 | 25 | 6  | 3 | NOT NAMED | 21.4 | 81.8 | 100 | 0 |
| 1917 | 9 | 25 | 12 | 3 | NOT NAMED | 21.8 | 82.5 | 100 | 0 |
| 1917 | 9 | 25 | 18 | 3 | NOT NAMED | 22.3 | 83.2 | 105 | 0 |



|      |   |    |    |             |      |      |     |     |
|------|---|----|----|-------------|------|------|-----|-----|
| 1917 | 9 | 26 | 0  | 3 NOT NAMED | 22.8 | 83.9 | 105 | 0   |
| 1917 | 9 | 26 | 6  | 3 NOT NAMED | 23.3 | 84.6 | 105 | 0   |
| 1917 | 9 | 26 | 12 | 3 NOT NAMED | 23.9 | 85.2 | 105 | 0   |
| 1917 | 9 | 26 | 18 | 3 NOT NAMED | 24.4 | 86.2 | 105 | 0   |
| 1917 | 9 | 27 | 0  | 3 NOT NAMED | 24.7 | 87.0 | 105 | 0   |
| 1917 | 9 | 27 | 6  | 3 NOT NAMED | 25.1 | 88.0 | 105 | 0   |
| 1917 | 9 | 27 | 12 | 3 NOT NAMED | 25.7 | 88.9 | 105 | 0   |
| 1917 | 9 | 27 | 18 | 3 NOT NAMED | 26.3 | 89.2 | 100 | 0   |
| 1917 | 9 | 28 | 0  | 3 NOT NAMED | 27.1 | 89.4 | 100 | 0   |
| 1917 | 9 | 28 | 6  | 3 NOT NAMED | 28.0 | 89.2 | 95  | 0   |
| 1917 | 9 | 28 | 12 | 3 NOT NAMED | 28.8 | 88.8 | 95  | 0   |
| 1917 | 9 | 28 | 18 | 3 NOT NAMED | 29.5 | 87.9 | 90  | 0   |
| 1917 | 9 | 29 | 0  | 3 NOT NAMED | 30.1 | 87.0 | 85  | 966 |
| 1917 | 9 | 29 | 6  | 3 NOT NAMED | 30.7 | 86.2 | 60  | 0   |
| 1917 | 9 | 29 | 12 | 3 NOT NAMED | 31.2 | 85.2 | 30  | 0   |
| 1917 | 9 | 29 | 18 | 3 NOT NAMED | 31.6 | 83.9 | 25  | 0   |
| 1918 | 8 | 1  | 0  | 1 NOT NAMED | 12.7 | 58.5 | 35  | 0   |
| 1918 | 8 | 1  | 6  | 1 NOT NAMED | 12.6 | 59.9 | 35  | 0   |
| 1918 | 8 | 1  | 12 | 1 NOT NAMED | 12.6 | 60.9 | 35  | 0   |
| 1918 | 8 | 1  | 18 | 1 NOT NAMED | 12.7 | 61.9 | 35  | 0   |
| 1918 | 8 | 2  | 0  | 1 NOT NAMED | 12.9 | 63.3 | 35  | 0   |
| 1918 | 8 | 2  | 6  | 1 NOT NAMED | 13.1 | 64.8 | 40  | 0   |
| 1918 | 8 | 2  | 12 | 1 NOT NAMED | 13.3 | 66.6 | 40  | 0   |
| 1918 | 8 | 2  | 18 | 1 NOT NAMED | 13.5 | 68.1 | 40  | 0   |
| 1918 | 8 | 3  | 0  | 1 NOT NAMED | 14.0 | 69.8 | 45  | 0   |
| 1918 | 8 | 3  | 6  | 1 NOT NAMED | 14.6 | 71.6 | 45  | 0   |
| 1918 | 8 | 3  | 12 | 1 NOT NAMED | 15.2 | 73.6 | 45  | 0   |
| 1918 | 8 | 3  | 18 | 1 NOT NAMED | 15.9 | 75.3 | 50  | 0   |
| 1918 | 8 | 4  | 0  | 1 NOT NAMED | 16.7 | 77.4 | 50  | 0   |
| 1918 | 8 | 4  | 6  | 1 NOT NAMED | 17.5 | 79.4 | 50  | 0   |
| 1918 | 8 | 4  | 12 | 1 NOT NAMED | 18.4 | 81.4 | 55  | 0   |
| 1918 | 8 | 4  | 18 | 1 NOT NAMED | 19.1 | 82.8 | 55  | 0   |
| 1918 | 8 | 5  | 0  | 1 NOT NAMED | 20.0 | 84.5 | 55  | 0   |
| 1918 | 8 | 5  | 6  | 1 NOT NAMED | 21.0 | 86.0 | 60  | 0   |
| 1918 | 8 | 5  | 12 | 1 NOT NAMED | 22.4 | 87.6 | 60  | 0   |
| 1918 | 8 | 5  | 18 | 1 NOT NAMED | 23.5 | 88.8 | 60  | 0   |
| 1918 | 8 | 6  | 0  | 1 NOT NAMED | 24.6 | 89.7 | 70  | 0   |
| 1918 | 8 | 6  | 6  | 1 NOT NAMED | 25.9 | 90.9 | 80  | 0   |
| 1918 | 8 | 6  | 12 | 1 NOT NAMED | 27.2 | 91.7 | 90  | 0   |
| 1918 | 8 | 6  | 18 | 1 NOT NAMED | 28.6 | 92.5 | 85  | 960 |
| 1918 | 8 | 7  | 0  | 1 NOT NAMED | 30.0 | 93.4 | 40  | 0   |
| 1918 | 8 | 7  | 6  | 1 NOT NAMED | 31.5 | 94.2 | 30  | 0   |
| 1918 | 8 | 22 | 6  | 2 NOT NAMED | 11.7 | 56.0 | 60  | 0   |
| 1918 | 8 | 22 | 12 | 2 NOT NAMED | 12.1 | 59.0 | 60  | 0   |

|      |         |             |      |      |    |   |
|------|---------|-------------|------|------|----|---|
| 1918 | 8 22 18 | 2 NOT NAMED | 12.3 | 60.6 | 60 | 0 |
| 1918 | 8 23 0  | 2 NOT NAMED | 12.5 | 61.8 | 65 | 0 |
| 1918 | 8 23 6  | 2 NOT NAMED | 12.7 | 63.6 | 70 | 0 |
| 1918 | 8 23 12 | 2 NOT NAMED | 13.0 | 66.5 | 70 | 0 |
| 1918 | 8 23 18 | 2 NOT NAMED | 13.3 | 68.4 | 70 | 0 |
| 1918 | 8 24 0  | 2 NOT NAMED | 13.6 | 70.4 | 70 | 0 |
| 1918 | 8 24 6  | 2 NOT NAMED | 14.0 | 72.3 | 70 | 0 |
| 1918 | 8 24 12 | 2 NOT NAMED | 14.5 | 74.4 | 70 | 0 |
| 1918 | 8 24 18 | 2 NOT NAMED | 14.8 | 76.4 | 70 | 0 |
| 1918 | 8 25 0  | 2 NOT NAMED | 15.2 | 78.8 | 70 | 0 |
| 1918 | 8 25 6  | 2 NOT NAMED | 15.7 | 80.9 | 70 | 0 |
| 1918 | 8 25 12 | 2 NOT NAMED | 16.0 | 83.0 | 70 | 0 |
| 1918 | 8 25 18 | 2 NOT NAMED | 16.5 | 85.2 | 65 | 0 |
| 1918 | 8 26 0  | 2 NOT NAMED | 16.9 | 87.6 | 55 | 0 |
| 1918 | 8 26 6  | 2 NOT NAMED | 16.8 | 89.4 | 30 | 0 |
| 1918 | 8 23 6  | 3 NOT NAMED | 27.7 | 73.3 | 35 | 0 |
| 1918 | 8 23 12 | 3 NOT NAMED | 28.8 | 74.5 | 35 | 0 |
| 1918 | 8 23 18 | 3 NOT NAMED | 30.4 | 75.7 | 40 | 0 |
| 1918 | 8 24 0  | 3 NOT NAMED | 31.9 | 76.6 | 40 | 0 |
| 1918 | 8 24 6  | 3 NOT NAMED | 33.2 | 77.1 | 45 | 0 |
| 1918 | 8 24 12 | 3 NOT NAMED | 34.0 | 77.3 | 50 | 0 |
| 1918 | 8 24 18 | 3 NOT NAMED | 34.7 | 77.0 | 50 | 0 |
| 1918 | 8 25 0  | 3 NOT NAMED | 35.4 | 76.6 | 50 | 0 |
| 1918 | 8 25 6  | 3 NOT NAMED | 35.8 | 76.2 | 45 | 0 |
| 1918 | 8 25 12 | 3 NOT NAMED | 36.2 | 75.8 | 40 | 0 |
| 1918 | 8 25 18 | 3 NOT NAMED | 36.7 | 75.2 | 35 | 0 |
| 1918 | 8 26 0  | 3 NOT NAMED | 37.4 | 74.2 | 30 | 0 |
| 1918 | 9 2 18  | 4 NOT NAMED | 24.6 | 55.1 | 60 | 0 |
| 1918 | 9 3 0   | 4 NOT NAMED | 25.6 | 57.0 | 65 | 0 |
| 1918 | 9 3 6   | 4 NOT NAMED | 26.2 | 58.0 | 70 | 0 |
| 1918 | 9 3 12  | 4 NOT NAMED | 26.9 | 59.0 | 70 | 0 |
| 1918 | 9 3 18  | 4 NOT NAMED | 27.5 | 60.2 | 75 | 0 |
| 1918 | 9 4 0   | 4 NOT NAMED | 28.2 | 61.4 | 75 | 0 |
| 1918 | 9 4 6   | 4 NOT NAMED | 29.0 | 62.6 | 80 | 0 |
| 1918 | 9 4 12  | 4 NOT NAMED | 29.8 | 63.8 | 80 | 0 |
| 1918 | 9 4 18  | 4 NOT NAMED | 30.8 | 64.8 | 85 | 0 |
| 1918 | 9 5 0   | 4 NOT NAMED | 31.8 | 65.6 | 85 | 0 |
| 1918 | 9 5 6   | 4 NOT NAMED | 32.8 | 66.2 | 85 | 0 |
| 1918 | 9 5 12  | 4 NOT NAMED | 33.8 | 66.8 | 85 | 0 |
| 1918 | 9 5 18  | 4 NOT NAMED | 35.3 | 67.2 | 80 | 0 |
| 1918 | 9 6 0   | 4 NOT NAMED | 36.3 | 67.4 | 75 | 0 |
| 1918 | 9 6 6   | 4 NOT NAMED | 38.0 | 67.6 | 65 | 0 |
| 1918 | 9 6 12  | 4 NOT NAMED | 39.7 | 67.5 | 65 | 0 |
| 1918 | 9 6 18  | 4 NOT NAMED | 42.0 | 66.8 | 55 | 0 |

|      |   |    |    |             |      |      |    |   |
|------|---|----|----|-------------|------|------|----|---|
| 1918 | 9 | 7  | 0  | 4 NOT NAMED | 43.8 | 65.5 | 50 | 0 |
| 1918 | 9 | 7  | 6  | 4 NOT NAMED | 45.1 | 64.1 | 45 | 0 |
| 1918 | 9 | 7  | 12 | 4 NOT NAMED | 46.8 | 62.4 | 40 | 0 |
| 1918 | 9 | 7  | 18 | 4 NOT NAMED | 48.0 | 60.0 | 40 | 0 |
| 1918 | 9 | 9  | 0  | 5 NOT NAMED | 13.5 | 58.0 | 35 | 0 |
| 1918 | 9 | 9  | 6  | 5 NOT NAMED | 14.3 | 60.5 | 35 | 0 |
| 1918 | 9 | 9  | 12 | 5 NOT NAMED | 14.7 | 61.6 | 35 | 0 |
| 1918 | 9 | 9  | 18 | 5 NOT NAMED | 15.0 | 62.2 | 35 | 0 |
| 1918 | 9 | 10 | 0  | 5 NOT NAMED | 15.3 | 62.9 | 35 | 0 |
| 1918 | 9 | 10 | 6  | 5 NOT NAMED | 15.6 | 63.6 | 35 | 0 |
| 1918 | 9 | 10 | 12 | 5 NOT NAMED | 16.0 | 64.3 | 35 | 0 |
| 1918 | 9 | 10 | 18 | 5 NOT NAMED | 16.2 | 65.0 | 35 | 0 |
| 1918 | 9 | 11 | 0  | 5 NOT NAMED | 16.5 | 65.7 | 35 | 0 |
| 1918 | 9 | 11 | 6  | 5 NOT NAMED | 16.7 | 66.3 | 40 | 0 |
| 1918 | 9 | 11 | 12 | 5 NOT NAMED | 17.0 | 67.0 | 40 | 0 |
| 1918 | 9 | 11 | 18 | 5 NOT NAMED | 17.3 | 67.6 | 40 | 0 |
| 1918 | 9 | 12 | 0  | 5 NOT NAMED | 17.6 | 68.2 | 40 | 0 |
| 1918 | 9 | 12 | 6  | 5 NOT NAMED | 17.9 | 68.8 | 40 | 0 |
| 1918 | 9 | 12 | 12 | 5 NOT NAMED | 18.4 | 69.4 | 40 | 0 |
| 1918 | 9 | 12 | 18 | 5 NOT NAMED | 18.9 | 70.1 | 35 | 0 |
| 1918 | 9 | 13 | 0  | 5 NOT NAMED | 19.5 | 70.7 | 35 | 0 |
| 1918 | 9 | 13 | 6  | 5 NOT NAMED | 20.4 | 71.5 | 35 | 0 |
| 1918 | 9 | 13 | 12 | 5 NOT NAMED | 21.5 | 72.7 | 35 | 0 |
| 1918 | 9 | 13 | 18 | 5 NOT NAMED | 22.7 | 73.4 | 35 | 0 |
| 1918 | 9 | 14 | 0  | 5 NOT NAMED | 24.3 | 74.1 | 35 | 0 |
| 1918 | 9 | 14 | 6  | 5 NOT NAMED | 25.8 | 74.7 | 30 | 0 |
| 1918 | 9 | 14 | 12 | 5 NOT NAMED | 27.7 | 75.0 | 25 | 0 |
| 1919 | 7 | 2  | 6  | 1 NOT NAMED | 24.2 | 84.3 | 40 | 0 |
| 1919 | 7 | 2  | 12 | 1 NOT NAMED | 25.0 | 84.7 | 40 | 0 |
| 1919 | 7 | 2  | 18 | 1 NOT NAMED | 25.4 | 85.0 | 40 | 0 |
| 1919 | 7 | 3  | 0  | 1 NOT NAMED | 26.0 | 85.3 | 40 | 0 |
| 1919 | 7 | 3  | 6  | 1 NOT NAMED | 26.7 | 85.6 | 45 | 0 |
| 1919 | 7 | 3  | 12 | 1 NOT NAMED | 27.5 | 86.0 | 50 | 0 |
| 1919 | 7 | 3  | 18 | 1 NOT NAMED | 28.3 | 86.2 | 50 | 0 |
| 1919 | 7 | 4  | 0  | 1 NOT NAMED | 29.1 | 86.6 | 50 | 0 |
| 1919 | 7 | 4  | 6  | 1 NOT NAMED | 29.9 | 86.9 | 50 | 0 |
| 1919 | 7 | 4  | 12 | 1 NOT NAMED | 30.6 | 87.1 | 40 | 0 |
| 1919 | 7 | 4  | 18 | 1 NOT NAMED | 31.2 | 87.3 | 35 | 0 |
| 1919 | 7 | 5  | 0  | 1 NOT NAMED | 31.8 | 87.6 | 30 | 0 |
| 1919 | 7 | 5  | 6  | 1 NOT NAMED | 32.4 | 87.9 | 25 | 0 |
| 1919 | 7 | 5  | 12 | 1 NOT NAMED | 33.0 | 88.2 | 20 | 0 |
| 1919 | 7 | 5  | 18 | 1 NOT NAMED | 33.5 | 88.5 | 20 | 0 |
| 1919 | 9 | 2  | 0  | 2 NOT NAMED | 14.6 | 61.5 | 40 | 0 |
| 1919 | 9 | 2  | 6  | 2 NOT NAMED | 15.0 | 62.7 | 40 | 0 |

|      |   |    |    |             |      |      |     |   |
|------|---|----|----|-------------|------|------|-----|---|
| 1919 | 9 | 2  | 12 | 2 NOT NAMED | 15.4 | 63.5 | 40  | 0 |
| 1919 | 9 | 2  | 18 | 2 NOT NAMED | 15.7 | 64.5 | 40  | 0 |
| 1919 | 9 | 3  | 0  | 2 NOT NAMED | 16.1 | 65.5 | 40  | 0 |
| 1919 | 9 | 3  | 6  | 2 NOT NAMED | 16.5 | 66.1 | 40  | 0 |
| 1919 | 9 | 3  | 12 | 2 NOT NAMED | 17.0 | 67.0 | 45  | 0 |
| 1919 | 9 | 3  | 18 | 2 NOT NAMED | 17.5 | 67.6 | 45  | 0 |
| 1919 | 9 | 4  | 0  | 2 NOT NAMED | 18.1 | 68.0 | 45  | 0 |
| 1919 | 9 | 4  | 6  | 2 NOT NAMED | 18.9 | 68.2 | 50  | 0 |
| 1919 | 9 | 4  | 12 | 2 NOT NAMED | 19.2 | 69.0 | 55  | 0 |
| 1919 | 9 | 4  | 18 | 2 NOT NAMED | 19.7 | 69.7 | 55  | 0 |
| 1919 | 9 | 5  | 0  | 2 NOT NAMED | 20.2 | 70.7 | 60  | 0 |
| 1919 | 9 | 5  | 6  | 2 NOT NAMED | 20.6 | 71.2 | 65  | 0 |
| 1919 | 9 | 5  | 12 | 2 NOT NAMED | 21.0 | 71.8 | 65  | 0 |
| 1919 | 9 | 5  | 18 | 2 NOT NAMED | 21.3 | 72.0 | 70  | 0 |
| 1919 | 9 | 6  | 0  | 2 NOT NAMED | 21.6 | 72.2 | 70  | 0 |
| 1919 | 9 | 6  | 6  | 2 NOT NAMED | 21.9 | 72.3 | 75  | 0 |
| 1919 | 9 | 6  | 12 | 2 NOT NAMED | 22.2 | 72.4 | 75  | 0 |
| 1919 | 9 | 6  | 18 | 2 NOT NAMED | 22.6 | 72.7 | 80  | 0 |
| 1919 | 9 | 7  | 0  | 2 NOT NAMED | 22.9 | 73.0 | 80  | 0 |
| 1919 | 9 | 7  | 6  | 2 NOT NAMED | 23.2 | 73.4 | 85  | 0 |
| 1919 | 9 | 7  | 12 | 2 NOT NAMED | 23.4 | 74.1 | 90  | 0 |
| 1919 | 9 | 7  | 18 | 2 NOT NAMED | 23.6 | 74.7 | 90  | 0 |
| 1919 | 9 | 8  | 0  | 2 NOT NAMED | 23.7 | 75.5 | 95  | 0 |
| 1919 | 9 | 8  | 6  | 2 NOT NAMED | 23.8 | 76.3 | 95  | 0 |
| 1919 | 9 | 8  | 12 | 2 NOT NAMED | 23.9 | 77.0 | 100 | 0 |
| 1919 | 9 | 8  | 18 | 2 NOT NAMED | 23.9 | 77.7 | 100 | 0 |
| 1919 | 9 | 9  | 0  | 2 NOT NAMED | 24.0 | 78.4 | 105 | 0 |
| 1919 | 9 | 9  | 6  | 2 NOT NAMED | 24.0 | 79.1 | 105 | 0 |
| 1919 | 9 | 9  | 12 | 2 NOT NAMED | 24.0 | 79.8 | 110 | 0 |
| 1919 | 9 | 9  | 18 | 2 NOT NAMED | 24.1 | 80.5 | 110 | 0 |
| 1919 | 9 | 10 | 0  | 2 NOT NAMED | 24.2 | 81.2 | 115 | 0 |
| 1919 | 9 | 10 | 6  | 2 NOT NAMED | 24.4 | 82.0 | 115 | 0 |
| 1919 | 9 | 10 | 12 | 2 NOT NAMED | 24.6 | 82.7 | 120 | 0 |
| 1919 | 9 | 10 | 18 | 2 NOT NAMED | 24.8 | 83.1 | 120 | 0 |
| 1919 | 9 | 11 | 0  | 2 NOT NAMED | 25.0 | 83.6 | 120 | 0 |
| 1919 | 9 | 11 | 6  | 2 NOT NAMED | 25.3 | 84.1 | 120 | 0 |
| 1919 | 9 | 11 | 12 | 2 NOT NAMED | 25.6 | 84.7 | 120 | 0 |
| 1919 | 9 | 11 | 18 | 2 NOT NAMED | 26.0 | 85.5 | 120 | 0 |
| 1919 | 9 | 12 | 0  | 2 NOT NAMED | 26.3 | 86.3 | 120 | 0 |
| 1919 | 9 | 12 | 6  | 2 NOT NAMED | 26.5 | 87.1 | 120 | 0 |
| 1919 | 9 | 12 | 12 | 2 NOT NAMED | 26.7 | 88.0 | 120 | 0 |
| 1919 | 9 | 12 | 18 | 2 NOT NAMED | 26.6 | 88.9 | 120 | 0 |
| 1919 | 9 | 13 | 0  | 2 NOT NAMED | 26.5 | 89.8 | 120 | 0 |
| 1919 | 9 | 13 | 6  | 2 NOT NAMED | 26.5 | 90.7 | 115 | 0 |

|      |    |    |    |   |           |      |       |     |   |
|------|----|----|----|---|-----------|------|-------|-----|---|
| 1919 | 9  | 13 | 12 | 2 | NOT NAMED | 26.5 | 91.6  | 115 | 0 |
| 1919 | 9  | 13 | 18 | 2 | NOT NAMED | 26.6 | 92.6  | 105 | 0 |
| 1919 | 9  | 14 | 0  | 2 | NOT NAMED | 26.7 | 93.6  | 100 | 0 |
| 1919 | 9  | 14 | 6  | 2 | NOT NAMED | 26.8 | 94.6  | 90  | 0 |
| 1919 | 9  | 14 | 12 | 2 | NOT NAMED | 27.0 | 95.7  | 85  | 0 |
| 1919 | 9  | 14 | 18 | 2 | NOT NAMED | 27.1 | 96.8  | 75  | 0 |
| 1919 | 9  | 15 | 0  | 2 | NOT NAMED | 27.4 | 97.9  | 65  | 0 |
| 1919 | 9  | 15 | 6  | 2 | NOT NAMED | 27.8 | 99.0  | 55  | 0 |
| 1919 | 9  | 15 | 12 | 2 | NOT NAMED | 28.2 | 100.2 | 30  | 0 |
| 1919 | 9  | 15 | 18 | 2 | NOT NAMED | 28.9 | 101.0 | 20  | 0 |
| 1919 | 11 | 11 | 6  | 3 | NOT NAMED | 27.4 | 59.5  | 40  | 0 |
| 1919 | 11 | 11 | 12 | 3 | NOT NAMED | 27.9 | 61.1  | 40  | 0 |
| 1919 | 11 | 11 | 18 | 3 | NOT NAMED | 28.1 | 62.5  | 40  | 0 |
| 1919 | 11 | 12 | 0  | 3 | NOT NAMED | 28.4 | 63.5  | 40  | 0 |
| 1919 | 11 | 12 | 6  | 3 | NOT NAMED | 28.7 | 64.4  | 40  | 0 |
| 1919 | 11 | 12 | 12 | 3 | NOT NAMED | 29.0 | 65.0  | 40  | 0 |
| 1919 | 11 | 12 | 18 | 3 | NOT NAMED | 29.3 | 65.4  | 40  | 0 |
| 1919 | 11 | 13 | 0  | 3 | NOT NAMED | 29.5 | 65.6  | 40  | 0 |
| 1919 | 11 | 13 | 6  | 3 | NOT NAMED | 29.7 | 65.7  | 40  | 0 |
| 1919 | 11 | 13 | 12 | 3 | NOT NAMED | 30.0 | 65.8  | 40  | 0 |
| 1919 | 11 | 13 | 18 | 3 | NOT NAMED | 30.5 | 66.0  | 40  | 0 |
| 1919 | 11 | 14 | 0  | 3 | NOT NAMED | 31.4 | 65.9  | 40  | 0 |
| 1919 | 11 | 14 | 6  | 3 | NOT NAMED | 32.6 | 65.3  | 40  | 0 |
| 1919 | 11 | 14 | 12 | 3 | NOT NAMED | 34.0 | 64.0  | 30  | 0 |
| 1919 | 11 | 14 | 18 | 3 | NOT NAMED | 35.1 | 61.5  | 30  | 0 |
| 1920 | 9  | 7  | 0  | 1 | NOT NAMED | 11.1 | 36.1  | 35  | 0 |
| 1920 | 9  | 7  | 6  | 1 | NOT NAMED | 11.5 | 37.8  | 35  | 0 |
| 1920 | 9  | 7  | 12 | 1 | NOT NAMED | 12.0 | 39.0  | 35  | 0 |
| 1920 | 9  | 7  | 18 | 1 | NOT NAMED | 12.7 | 40.1  | 35  | 0 |
| 1920 | 9  | 8  | 0  | 1 | NOT NAMED | 13.4 | 41.1  | 35  | 0 |
| 1920 | 9  | 8  | 6  | 1 | NOT NAMED | 14.1 | 42.1  | 40  | 0 |
| 1920 | 9  | 8  | 12 | 1 | NOT NAMED | 14.8 | 43.0  | 40  | 0 |
| 1920 | 9  | 8  | 18 | 1 | NOT NAMED | 15.5 | 43.9  | 45  | 0 |
| 1920 | 9  | 9  | 0  | 1 | NOT NAMED | 16.3 | 44.7  | 50  | 0 |
| 1920 | 9  | 9  | 6  | 1 | NOT NAMED | 17.0 | 45.6  | 55  | 0 |
| 1920 | 9  | 9  | 12 | 1 | NOT NAMED | 17.8 | 46.4  | 60  | 0 |
| 1920 | 9  | 9  | 18 | 1 | NOT NAMED | 18.7 | 47.2  | 65  | 0 |
| 1920 | 9  | 10 | 0  | 1 | NOT NAMED | 19.6 | 48.0  | 70  | 0 |
| 1920 | 9  | 10 | 6  | 1 | NOT NAMED | 20.6 | 48.8  | 75  | 0 |
| 1920 | 9  | 10 | 12 | 1 | NOT NAMED | 21.5 | 49.4  | 75  | 0 |
| 1920 | 9  | 10 | 18 | 1 | NOT NAMED | 22.3 | 49.9  | 80  | 0 |
| 1920 | 9  | 11 | 0  | 1 | NOT NAMED | 23.0 | 50.3  | 80  | 0 |
| 1920 | 9  | 11 | 6  | 1 | NOT NAMED | 23.7 | 50.7  | 85  | 0 |
| 1920 | 9  | 11 | 12 | 1 | NOT NAMED | 24.6 | 51.0  | 85  | 0 |

|      |         |             |      |      |    |   |
|------|---------|-------------|------|------|----|---|
| 1920 | 9 11 18 | 1 NOT NAMED | 25.6 | 51.4 | 85 | 0 |
| 1920 | 9 12 0  | 1 NOT NAMED | 26.7 | 51.7 | 90 | 0 |
| 1920 | 9 12 6  | 1 NOT NAMED | 27.8 | 52.0 | 95 | 0 |
| 1920 | 9 12 12 | 1 NOT NAMED | 29.0 | 52.2 | 95 | 0 |
| 1920 | 9 12 18 | 1 NOT NAMED | 30.2 | 52.0 | 95 | 0 |
| 1920 | 9 13 0  | 1 NOT NAMED | 31.4 | 51.7 | 95 | 0 |
| 1920 | 9 13 6  | 1 NOT NAMED | 32.6 | 51.1 | 95 | 0 |
| 1920 | 9 13 12 | 1 NOT NAMED | 33.8 | 50.3 | 95 | 0 |
| 1920 | 9 13 18 | 1 NOT NAMED | 35.0 | 49.4 | 90 | 0 |
| 1920 | 9 14 0  | 1 NOT NAMED | 36.3 | 48.2 | 90 | 0 |
| 1920 | 9 14 6  | 1 NOT NAMED | 37.6 | 46.7 | 90 | 0 |
| 1920 | 9 14 12 | 1 NOT NAMED | 38.8 | 45.0 | 85 | 0 |
| 1920 | 9 14 18 | 1 NOT NAMED | 39.8 | 43.0 | 80 | 0 |
| 1920 | 9 15 0  | 1 NOT NAMED | 40.5 | 40.6 | 70 | 0 |
| 1920 | 9 15 6  | 1 NOT NAMED | 41.0 | 37.9 | 65 | 0 |
| 1920 | 9 15 12 | 1 NOT NAMED | 41.4 | 35.0 | 55 | 0 |
| 1920 | 9 15 18 | 1 NOT NAMED | 41.8 | 31.9 | 50 | 0 |
| 1920 | 9 16 0  | 1 NOT NAMED | 42.0 | 28.5 | 45 | 0 |
| 1920 | 9 16 6  | 1 NOT NAMED | 42.1 | 24.9 | 40 | 0 |
| 1920 | 9 16 12 | 1 NOT NAMED | 42.0 | 21.0 | 35 | 0 |
| 1920 | 9 16 18 | 1 NOT NAMED | 41.9 | 17.2 | 35 | 0 |
| 1920 | 9 16 6  | 2 NOT NAMED | 12.2 | 76.5 | 35 | 0 |
| 1920 | 9 16 12 | 2 NOT NAMED | 12.4 | 77.0 | 35 | 0 |
| 1920 | 9 16 18 | 2 NOT NAMED | 12.5 | 78.0 | 35 | 0 |
| 1920 | 9 17 0  | 2 NOT NAMED | 12.7 | 79.0 | 35 | 0 |
| 1920 | 9 17 6  | 2 NOT NAMED | 13.0 | 80.0 | 35 | 0 |
| 1920 | 9 17 12 | 2 NOT NAMED | 13.3 | 80.8 | 35 | 0 |
| 1920 | 9 17 18 | 2 NOT NAMED | 13.7 | 81.6 | 35 | 0 |
| 1920 | 9 18 0  | 2 NOT NAMED | 14.1 | 82.3 | 35 | 0 |
| 1920 | 9 18 6  | 2 NOT NAMED | 14.6 | 83.0 | 35 | 0 |
| 1920 | 9 18 12 | 2 NOT NAMED | 15.2 | 83.7 | 35 | 0 |
| 1920 | 9 18 18 | 2 NOT NAMED | 15.9 | 84.4 | 35 | 0 |
| 1920 | 9 19 0  | 2 NOT NAMED | 16.6 | 85.1 | 35 | 0 |
| 1920 | 9 19 6  | 2 NOT NAMED | 17.3 | 85.7 | 35 | 0 |
| 1920 | 9 19 12 | 2 NOT NAMED | 18.0 | 86.3 | 40 | 0 |
| 1920 | 9 19 18 | 2 NOT NAMED | 18.7 | 86.8 | 40 | 0 |
| 1920 | 9 20 0  | 2 NOT NAMED | 19.5 | 87.3 | 45 | 0 |
| 1920 | 9 20 6  | 2 NOT NAMED | 20.3 | 87.7 | 45 | 0 |
| 1920 | 9 20 12 | 2 NOT NAMED | 21.2 | 88.2 | 50 | 0 |
| 1920 | 9 20 18 | 2 NOT NAMED | 22.3 | 88.7 | 50 | 0 |
| 1920 | 9 21 0  | 2 NOT NAMED | 23.5 | 89.1 | 55 | 0 |
| 1920 | 9 21 6  | 2 NOT NAMED | 24.9 | 89.5 | 60 | 0 |
| 1920 | 9 21 12 | 2 NOT NAMED | 26.4 | 90.0 | 65 | 0 |
| 1920 | 9 21 18 | 2 NOT NAMED | 27.9 | 90.5 | 75 | 0 |

|      |      |    |             |      |      |    |     |
|------|------|----|-------------|------|------|----|-----|
| 1920 | 9 22 | 0  | 2 NOT NAMED | 29.4 | 91.0 | 90 | 982 |
| 1920 | 9 22 | 6  | 2 NOT NAMED | 30.9 | 91.7 | 65 | 987 |
| 1920 | 9 22 | 12 | 2 NOT NAMED | 32.2 | 92.6 | 45 | 0   |
| 1920 | 9 22 | 18 | 2 NOT NAMED | 34.0 | 93.2 | 35 | 0   |
| 1920 | 9 23 | 0  | 2 NOT NAMED | 35.5 | 93.8 | 30 | 0   |
| 1920 | 9 23 | 6  | 2 NOT NAMED | 38.2 | 94.8 | 25 | 0   |
| 1920 | 9 23 | 12 | 2 NOT NAMED | 41.0 | 95.0 | 20 | 0   |
| 1920 | 9 20 | 6  | 3 NOT NAMED | 29.8 | 73.5 | 50 | 0   |
| 1920 | 9 20 | 12 | 3 NOT NAMED | 30.2 | 73.8 | 50 | 0   |
| 1920 | 9 20 | 18 | 3 NOT NAMED | 30.4 | 74.0 | 50 | 0   |
| 1920 | 9 21 | 0  | 3 NOT NAMED | 30.7 | 74.3 | 50 | 0   |
| 1920 | 9 21 | 6  | 3 NOT NAMED | 31.1 | 74.8 | 50 | 0   |
| 1920 | 9 21 | 12 | 3 NOT NAMED | 31.3 | 75.0 | 55 | 0   |
| 1920 | 9 21 | 18 | 3 NOT NAMED | 31.5 | 75.2 | 55 | 0   |
| 1920 | 9 22 | 0  | 3 NOT NAMED | 31.7 | 75.4 | 60 | 0   |
| 1920 | 9 22 | 6  | 3 NOT NAMED | 32.1 | 75.9 | 65 | 0   |
| 1920 | 9 22 | 12 | 3 NOT NAMED | 32.5 | 76.4 | 65 | 0   |
| 1920 | 9 22 | 18 | 3 NOT NAMED | 33.0 | 77.0 | 70 | 0   |
| 1920 | 9 23 | 0  | 3 NOT NAMED | 33.7 | 77.8 | 65 | 0   |
| 1920 | 9 23 | 6  | 3 NOT NAMED | 34.4 | 78.8 | 55 | 0   |
| 1920 | 9 23 | 12 | 3 NOT NAMED | 35.2 | 79.8 | 30 | 0   |
| 1920 | 9 23 | 18 | 3 NOT NAMED | 35.8 | 80.8 | 25 | 0   |
| 1920 | 9 25 | 6  | 4 NOT NAMED | 25.0 | 83.3 | 35 | 0   |
| 1920 | 9 25 | 12 | 4 NOT NAMED | 24.8 | 83.7 | 35 | 0   |
| 1920 | 9 25 | 18 | 4 NOT NAMED | 24.7 | 84.0 | 35 | 0   |
| 1920 | 9 26 | 0  | 4 NOT NAMED | 24.5 | 84.2 | 35 | 0   |
| 1920 | 9 26 | 6  | 4 NOT NAMED | 24.3 | 84.6 | 35 | 0   |
| 1920 | 9 26 | 12 | 4 NOT NAMED | 24.2 | 84.9 | 35 | 0   |
| 1920 | 9 26 | 18 | 4 NOT NAMED | 24.1 | 85.6 | 35 | 0   |
| 1920 | 9 27 | 0  | 4 NOT NAMED | 24.1 | 86.3 | 35 | 0   |
| 1920 | 9 27 | 6  | 4 NOT NAMED | 24.1 | 86.9 | 40 | 0   |
| 1920 | 9 27 | 12 | 4 NOT NAMED | 24.2 | 87.6 | 40 | 0   |
| 1920 | 9 27 | 18 | 4 NOT NAMED | 24.3 | 87.9 | 45 | 0   |
| 1920 | 9 28 | 0  | 4 NOT NAMED | 24.4 | 88.2 | 50 | 0   |
| 1920 | 9 28 | 6  | 4 NOT NAMED | 24.6 | 88.5 | 50 | 0   |
| 1920 | 9 28 | 12 | 4 NOT NAMED | 24.8 | 88.7 | 55 | 0   |
| 1920 | 9 28 | 18 | 4 NOT NAMED | 25.0 | 88.9 | 60 | 0   |
| 1920 | 9 29 | 0  | 4 NOT NAMED | 25.3 | 89.0 | 65 | 0   |
| 1920 | 9 29 | 6  | 4 NOT NAMED | 25.7 | 89.0 | 70 | 0   |
| 1920 | 9 29 | 12 | 4 NOT NAMED | 26.1 | 88.9 | 70 | 0   |
| 1920 | 9 29 | 18 | 4 NOT NAMED | 26.7 | 88.3 | 70 | 0   |
| 1920 | 9 30 | 0  | 4 NOT NAMED | 27.7 | 86.5 | 65 | 0   |
| 1920 | 9 30 | 6  | 4 NOT NAMED | 28.9 | 84.0 | 55 | 0   |
| 1920 | 9 30 | 12 | 4 NOT NAMED | 30.3 | 81.0 | 35 | 0   |

|      |         |             |      |      |    |   |
|------|---------|-------------|------|------|----|---|
| 1920 | 9 30 18 | 4 NOT NAMED | 31.1 | 78.0 | 20 | 0 |
| 1921 | 6 15 0  | 1 NOT NAMED | 14.1 | 78.9 | 35 | 0 |
| 1921 | 6 15 6  | 1 NOT NAMED | 14.4 | 79.7 | 35 | 0 |
| 1921 | 6 15 12 | 1 NOT NAMED | 14.8 | 80.5 | 35 | 0 |
| 1921 | 6 15 18 | 1 NOT NAMED | 15.0 | 81.5 | 35 | 0 |
| 1921 | 6 16 0  | 1 NOT NAMED | 15.3 | 82.4 | 35 | 0 |
| 1921 | 6 16 6  | 1 NOT NAMED | 15.6 | 83.2 | 40 | 0 |
| 1921 | 6 16 12 | 1 NOT NAMED | 15.8 | 84.0 | 40 | 0 |
| 1921 | 6 16 18 | 1 NOT NAMED | 16.0 | 84.8 | 45 | 0 |
| 1921 | 6 17 0  | 1 NOT NAMED | 16.1 | 85.6 | 45 | 0 |
| 1921 | 6 17 6  | 1 NOT NAMED | 16.2 | 86.4 | 45 | 0 |
| 1921 | 6 17 12 | 1 NOT NAMED | 16.5 | 87.2 | 40 | 0 |
| 1921 | 6 17 18 | 1 NOT NAMED | 17.0 | 88.2 | 35 | 0 |
| 1921 | 6 18 0  | 1 NOT NAMED | 17.5 | 89.1 | 35 | 0 |
| 1921 | 6 18 6  | 1 NOT NAMED | 18.1 | 90.2 | 40 | 0 |
| 1921 | 6 18 12 | 1 NOT NAMED | 18.7 | 91.2 | 45 | 0 |
| 1921 | 6 18 18 | 1 NOT NAMED | 19.3 | 92.1 | 55 | 0 |
| 1921 | 6 19 0  | 1 NOT NAMED | 19.9 | 93.1 | 60 | 0 |
| 1921 | 6 19 6  | 1 NOT NAMED | 20.4 | 93.6 | 60 | 0 |
| 1921 | 6 19 12 | 1 NOT NAMED | 21.0 | 94.3 | 75 | 0 |
| 1921 | 6 19 18 | 1 NOT NAMED | 21.6 | 94.7 | 75 | 0 |
| 1921 | 6 20 0  | 1 NOT NAMED | 22.1 | 95.0 | 80 | 0 |
| 1921 | 6 20 6  | 1 NOT NAMED | 22.7 | 95.2 | 85 | 0 |
| 1921 | 6 20 12 | 1 NOT NAMED | 23.3 | 95.4 | 85 | 0 |
| 1921 | 6 20 18 | 1 NOT NAMED | 23.8 | 95.6 | 85 | 0 |
| 1921 | 6 21 0  | 1 NOT NAMED | 24.2 | 95.7 | 85 | 0 |
| 1921 | 6 21 6  | 1 NOT NAMED | 24.7 | 95.9 | 85 | 0 |
| 1921 | 6 21 12 | 1 NOT NAMED | 25.1 | 96.0 | 85 | 0 |
| 1921 | 6 21 18 | 1 NOT NAMED | 25.6 | 96.1 | 85 | 0 |
| 1921 | 6 22 0  | 1 NOT NAMED | 26.0 | 96.1 | 85 | 0 |
| 1921 | 6 22 6  | 1 NOT NAMED | 26.7 | 96.2 | 80 | 0 |
| 1921 | 6 22 12 | 1 NOT NAMED | 27.6 | 96.2 | 75 | 0 |
| 1921 | 6 22 18 | 1 NOT NAMED | 28.7 | 96.3 | 65 | 0 |
| 1921 | 6 23 0  | 1 NOT NAMED | 29.9 | 96.5 | 50 | 0 |
| 1921 | 6 23 6  | 1 NOT NAMED | 31.0 | 96.6 | 45 | 0 |
| 1921 | 6 23 12 | 1 NOT NAMED | 32.1 | 96.7 | 40 | 0 |
| 1921 | 6 23 18 | 1 NOT NAMED | 33.2 | 96.5 | 40 | 0 |
| 1921 | 6 24 0  | 1 NOT NAMED | 34.3 | 96.1 | 35 | 0 |
| 1921 | 6 24 6  | 1 NOT NAMED | 35.5 | 95.6 | 30 | 0 |
| 1921 | 6 24 12 | 1 NOT NAMED | 36.6 | 95.3 | 30 | 0 |
| 1921 | 6 24 18 | 1 NOT NAMED | 37.5 | 95.1 | 30 | 0 |
| 1921 | 6 25 0  | 1 NOT NAMED | 38.1 | 95.0 | 30 | 0 |
| 1921 | 6 25 6  | 1 NOT NAMED | 38.5 | 94.9 | 30 | 0 |
| 1921 | 6 25 12 | 1 NOT NAMED | 38.9 | 94.8 | 25 | 0 |



|      |         |             |      |      |     |   |
|------|---------|-------------|------|------|-----|---|
| 1921 | 6 25 18 | 1 NOT NAMED | 39.4 | 94.7 | 20  | 0 |
| 1921 | 6 26 0  | 1 NOT NAMED | 39.9 | 94.7 | 20  | 0 |
| 1921 | 6 26 6  | 1 NOT NAMED | 40.4 | 94.7 | 15  | 0 |
| 1921 | 6 26 12 | 1 NOT NAMED | 40.8 | 94.7 | 15  | 0 |
| 1921 | 9 6 6   | 2 NOT NAMED | 21.4 | 93.8 | 60  | 0 |
| 1921 | 9 6 12  | 2 NOT NAMED | 21.5 | 95.3 | 60  | 0 |
| 1921 | 9 6 18  | 2 NOT NAMED | 21.6 | 96.1 | 70  | 0 |
| 1921 | 9 7 0   | 2 NOT NAMED | 21.7 | 96.9 | 70  | 0 |
| 1921 | 9 7 6   | 2 NOT NAMED | 21.9 | 97.8 | 70  | 0 |
| 1921 | 9 7 12  | 2 NOT NAMED | 22.4 | 98.6 | 60  | 0 |
| 1921 | 9 7 18  | 2 NOT NAMED | 23.2 | 98.9 | 60  | 0 |
| 1921 | 9 8 0   | 2 NOT NAMED | 24.0 | 98.8 | 50  | 0 |
| 1921 | 9 8 6   | 2 NOT NAMED | 24.8 | 98.7 | 30  | 0 |
| 1921 | 9 8 0   | 3 NOT NAMED | 10.2 | 55.1 | 60  | 0 |
| 1921 | 9 8 6   | 3 NOT NAMED | 11.0 | 57.3 | 65  | 0 |
| 1921 | 9 8 12  | 3 NOT NAMED | 11.6 | 58.6 | 70  | 0 |
| 1921 | 9 8 18  | 3 NOT NAMED | 12.2 | 59.8 | 70  | 0 |
| 1921 | 9 9 0   | 3 NOT NAMED | 13.1 | 61.1 | 70  | 0 |
| 1921 | 9 9 6   | 3 NOT NAMED | 13.9 | 62.3 | 70  | 0 |
| 1921 | 9 9 12  | 3 NOT NAMED | 14.7 | 63.6 | 70  | 0 |
| 1921 | 9 9 18  | 3 NOT NAMED | 15.0 | 64.9 | 70  | 0 |
| 1921 | 9 10 0  | 3 NOT NAMED | 15.3 | 66.1 | 75  | 0 |
| 1921 | 9 10 6  | 3 NOT NAMED | 15.7 | 67.6 | 75  | 0 |
| 1921 | 9 10 12 | 3 NOT NAMED | 16.3 | 69.0 | 80  | 0 |
| 1921 | 9 10 18 | 3 NOT NAMED | 17.2 | 69.3 | 80  | 0 |
| 1921 | 9 11 0  | 3 NOT NAMED | 18.0 | 69.5 | 85  | 0 |
| 1921 | 9 11 6  | 3 NOT NAMED | 18.9 | 69.6 | 80  | 0 |
| 1921 | 9 11 12 | 3 NOT NAMED | 19.8 | 69.6 | 80  | 0 |
| 1921 | 9 11 18 | 3 NOT NAMED | 20.6 | 69.7 | 80  | 0 |
| 1921 | 9 12 0  | 3 NOT NAMED | 21.5 | 69.7 | 85  | 0 |
| 1921 | 9 12 6  | 3 NOT NAMED | 22.3 | 69.7 | 90  | 0 |
| 1921 | 9 12 12 | 3 NOT NAMED | 23.1 | 69.7 | 95  | 0 |
| 1921 | 9 12 18 | 3 NOT NAMED | 23.9 | 69.7 | 95  | 0 |
| 1921 | 9 13 0  | 3 NOT NAMED | 24.8 | 69.7 | 100 | 0 |
| 1921 | 9 13 6  | 3 NOT NAMED | 25.6 | 69.6 | 100 | 0 |
| 1921 | 9 13 12 | 3 NOT NAMED | 26.4 | 69.5 | 105 | 0 |
| 1921 | 9 13 18 | 3 NOT NAMED | 27.2 | 69.2 | 105 | 0 |
| 1921 | 9 14 0  | 3 NOT NAMED | 28.0 | 68.9 | 105 | 0 |
| 1921 | 9 14 6  | 3 NOT NAMED | 28.7 | 68.5 | 105 | 0 |
| 1921 | 9 14 12 | 3 NOT NAMED | 29.5 | 68.0 | 105 | 0 |
| 1921 | 9 14 18 | 3 NOT NAMED | 30.3 | 67.6 | 105 | 0 |
| 1921 | 9 15 0  | 3 NOT NAMED | 31.1 | 67.0 | 100 | 0 |
| 1921 | 9 15 6  | 3 NOT NAMED | 31.9 | 66.2 | 100 | 0 |
| 1921 | 9 15 12 | 3 NOT NAMED | 32.5 | 65.7 | 95  | 0 |

|      |          |             |      |      |    |   |
|------|----------|-------------|------|------|----|---|
| 1921 | 9 15 18  | 3 NOT NAMED | 34.4 | 63.5 | 95 | 0 |
| 1921 | 9 16 0   | 3 NOT NAMED | 36.0 | 61.0 | 90 | 0 |
| 1921 | 9 16 6   | 3 NOT NAMED | 38.0 | 58.3 | 90 | 0 |
| 1921 | 9 16 12  | 3 NOT NAMED | 40.1 | 55.1 | 90 | 0 |
| 1921 | 9 16 18  | 3 NOT NAMED | 43.9 | 50.3 | 85 | 0 |
| 1921 | 9 10 0   | 4 NOT NAMED | 23.2 | 64.0 | 35 | 0 |
| 1921 | 9 10 6   | 4 NOT NAMED | 25.4 | 64.7 | 35 | 0 |
| 1921 | 9 10 12  | 4 NOT NAMED | 25.9 | 64.7 | 35 | 0 |
| 1921 | 9 10 18  | 4 NOT NAMED | 26.4 | 64.8 | 35 | 0 |
| 1921 | 9 11 0   | 4 NOT NAMED | 27.0 | 64.8 | 35 | 0 |
| 1921 | 9 11 6   | 4 NOT NAMED | 27.6 | 64.7 | 35 | 0 |
| 1921 | 9 11 12  | 4 NOT NAMED | 28.2 | 64.7 | 35 | 0 |
| 1921 | 9 11 18  | 4 NOT NAMED | 28.8 | 64.5 | 35 | 0 |
| 1921 | 9 12 0   | 4 NOT NAMED | 29.3 | 64.3 | 35 | 0 |
| 1921 | 9 12 6   | 4 NOT NAMED | 29.8 | 64.0 | 40 | 0 |
| 1921 | 9 12 12  | 4 NOT NAMED | 30.4 | 63.8 | 50 | 0 |
| 1921 | 9 12 18  | 4 NOT NAMED | 31.9 | 62.6 | 55 | 0 |
| 1921 | 9 13 0   | 4 NOT NAMED | 33.4 | 61.5 | 60 | 0 |
| 1921 | 9 13 6   | 4 NOT NAMED | 34.8 | 60.2 | 60 | 0 |
| 1921 | 9 13 12  | 4 NOT NAMED | 36.0 | 59.0 | 45 | 0 |
| 1921 | 9 13 18  | 4 NOT NAMED | 37.4 | 57.5 | 30 | 0 |
| 1921 | 10 16 6  | 5 NOT NAMED | 30.7 | 77.6 | 35 | 0 |
| 1921 | 10 16 12 | 5 NOT NAMED | 31.7 | 76.2 | 40 | 0 |
| 1921 | 10 16 18 | 5 NOT NAMED | 33.1 | 73.8 | 40 | 0 |
| 1921 | 10 17 0  | 5 NOT NAMED | 34.5 | 71.4 | 40 | 0 |
| 1921 | 10 17 6  | 5 NOT NAMED | 35.8 | 68.5 | 45 | 0 |
| 1921 | 10 17 12 | 5 NOT NAMED | 37.0 | 66.0 | 45 | 0 |
| 1921 | 10 17 18 | 5 NOT NAMED | 38.2 | 63.1 | 45 | 0 |
| 1921 | 10 18 0  | 5 NOT NAMED | 39.4 | 60.1 | 45 | 0 |
| 1921 | 10 18 6  | 5 NOT NAMED | 40.4 | 57.1 | 50 | 0 |
| 1921 | 10 18 12 | 5 NOT NAMED | 41.1 | 54.1 | 50 | 0 |
| 1921 | 10 18 18 | 5 NOT NAMED | 41.5 | 51.1 | 50 | 0 |
| 1921 | 10 19 0  | 5 NOT NAMED | 41.7 | 48.0 | 50 | 0 |
| 1921 | 10 19 6  | 5 NOT NAMED | 41.9 | 45.0 | 50 | 0 |
| 1921 | 10 19 12 | 5 NOT NAMED | 42.0 | 42.0 | 50 | 0 |
| 1921 | 10 19 18 | 5 NOT NAMED | 42.2 | 39.4 | 50 | 0 |
| 1921 | 10 20 0  | 5 NOT NAMED | 42.3 | 37.3 | 45 | 0 |
| 1921 | 10 20 6  | 5 NOT NAMED | 42.3 | 35.5 | 45 | 0 |
| 1921 | 10 20 12 | 5 NOT NAMED | 42.2 | 34.2 | 40 | 0 |
| 1921 | 10 20 18 | 5 NOT NAMED | 41.8 | 32.8 | 40 | 0 |
| 1921 | 10 21 0  | 5 NOT NAMED | 41.2 | 31.8 | 40 | 0 |
| 1921 | 10 21 6  | 5 NOT NAMED | 40.7 | 30.9 | 35 | 0 |
| 1921 | 10 21 12 | 5 NOT NAMED | 40.0 | 30.0 | 35 | 0 |
| 1921 | 10 21 18 | 5 NOT NAMED | 39.2 | 29.0 | 35 | 0 |

|            |    |             |      |      |     |     |
|------------|----|-------------|------|------|-----|-----|
| 1921 10 22 | 0  | 5 NOT NAMED | 38.3 | 28.7 | 35  | 0   |
| 1921 10 22 | 6  | 5 NOT NAMED | 37.3 | 29.0 | 35  | 0   |
| 1921 10 22 | 12 | 5 NOT NAMED | 36.7 | 30.0 | 35  | 0   |
| 1921 10 22 | 18 | 5 NOT NAMED | 36.3 | 30.7 | 35  | 0   |
| 1921 10 23 | 0  | 5 NOT NAMED | 36.0 | 31.5 | 35  | 0   |
| 1921 10 23 | 6  | 5 NOT NAMED | 35.8 | 32.1 | 35  | 0   |
| 1921 10 23 | 12 | 5 NOT NAMED | 35.6 | 33.0 | 30  | 0   |
| 1921 10 23 | 18 | 5 NOT NAMED | 35.6 | 34.0 | 30  | 0   |
| 1921 10 20 | 0  | 6 NOT NAMED | 12.3 | 80.1 | 35  | 0   |
| 1921 10 20 | 6  | 6 NOT NAMED | 13.1 | 80.4 | 35  | 0   |
| 1921 10 20 | 12 | 6 NOT NAMED | 13.7 | 80.6 | 35  | 0   |
| 1921 10 20 | 18 | 6 NOT NAMED | 14.3 | 80.9 | 40  | 0   |
| 1921 10 21 | 0  | 6 NOT NAMED | 14.8 | 81.2 | 45  | 0   |
| 1921 10 21 | 6  | 6 NOT NAMED | 15.3 | 81.5 | 50  | 0   |
| 1921 10 21 | 12 | 6 NOT NAMED | 15.8 | 81.8 | 50  | 0   |
| 1921 10 21 | 18 | 6 NOT NAMED | 16.2 | 82.1 | 55  | 0   |
| 1921 10 22 | 0  | 6 NOT NAMED | 16.6 | 82.4 | 65  | 0   |
| 1921 10 22 | 6  | 6 NOT NAMED | 17.0 | 82.7 | 70  | 0   |
| 1921 10 22 | 12 | 6 NOT NAMED | 17.5 | 83.0 | 75  | 0   |
| 1921 10 22 | 18 | 6 NOT NAMED | 18.1 | 83.4 | 80  | 0   |
| 1921 10 23 | 0  | 6 NOT NAMED | 18.7 | 83.8 | 85  | 0   |
| 1921 10 23 | 6  | 6 NOT NAMED | 19.4 | 84.3 | 90  | 0   |
| 1921 10 23 | 12 | 6 NOT NAMED | 20.2 | 84.8 | 95  | 0   |
| 1921 10 23 | 18 | 6 NOT NAMED | 21.0 | 85.4 | 100 | 0   |
| 1921 10 24 | 0  | 6 NOT NAMED | 21.8 | 85.8 | 110 | 0   |
| 1921 10 24 | 6  | 6 NOT NAMED | 22.6 | 86.0 | 115 | 0   |
| 1921 10 24 | 12 | 6 NOT NAMED | 23.4 | 86.0 | 120 | 0   |
| 1921 10 24 | 18 | 6 NOT NAMED | 24.3 | 85.7 | 120 | 0   |
| 1921 10 25 | 0  | 6 NOT NAMED | 25.1 | 85.2 | 120 | 0   |
| 1921 10 25 | 6  | 6 NOT NAMED | 26.0 | 84.6 | 115 | 0   |
| 1921 10 25 | 12 | 6 NOT NAMED | 26.9 | 84.0 | 105 | 0   |
| 1921 10 25 | 18 | 6 NOT NAMED | 27.8 | 83.1 | 90  | 952 |
| 1921 10 26 | 0  | 6 NOT NAMED | 28.5 | 82.0 | 85  | 0   |
| 1921 10 26 | 6  | 6 NOT NAMED | 29.0 | 80.9 | 80  | 0   |
| 1921 10 26 | 12 | 6 NOT NAMED | 29.1 | 79.6 | 75  | 0   |
| 1921 10 26 | 18 | 6 NOT NAMED | 28.9 | 78.0 | 75  | 0   |
| 1921 10 27 | 0  | 6 NOT NAMED | 28.6 | 76.3 | 80  | 0   |
| 1921 10 27 | 6  | 6 NOT NAMED | 28.4 | 74.6 | 80  | 0   |
| 1921 10 27 | 12 | 6 NOT NAMED | 28.1 | 73.1 | 85  | 0   |
| 1921 10 27 | 18 | 6 NOT NAMED | 27.9 | 71.8 | 85  | 0   |
| 1921 10 28 | 0  | 6 NOT NAMED | 27.6 | 70.5 | 85  | 0   |
| 1921 10 28 | 6  | 6 NOT NAMED | 27.4 | 69.3 | 75  | 0   |
| 1921 10 28 | 12 | 6 NOT NAMED | 27.2 | 68.0 | 70  | 0   |
| 1921 10 28 | 18 | 6 NOT NAMED | 27.1 | 66.7 | 70  | 0   |

|      |    |    |    |   |           |      |       |     |   |
|------|----|----|----|---|-----------|------|-------|-----|---|
| 1921 | 10 | 29 | 0  | 6 | NOT NAMED | 27.0 | 65.5  | 70  | 0 |
| 1921 | 10 | 29 | 6  | 6 | NOT NAMED | 27.1 | 64.2  | 70  | 0 |
| 1921 | 10 | 29 | 12 | 6 | NOT NAMED | 27.2 | 63.0  | 70  | 0 |
| 1921 | 10 | 29 | 18 | 6 | NOT NAMED | 27.4 | 61.3  | 70  | 0 |
| 1921 | 10 | 30 | 0  | 6 | NOT NAMED | 31.0 | 55.2  | 70  | 0 |
| 1922 | 6  | 12 | 12 | 1 | NOT NAMED | 15.5 | 82.3  | 35  | 0 |
| 1922 | 6  | 12 | 18 | 1 | NOT NAMED | 16.3 | 83.4  | 40  | 0 |
| 1922 | 6  | 13 | 0  | 1 | NOT NAMED | 17.1 | 84.3  | 40  | 0 |
| 1922 | 6  | 13 | 6  | 1 | NOT NAMED | 17.8 | 85.3  | 40  | 0 |
| 1922 | 6  | 13 | 12 | 1 | NOT NAMED | 18.3 | 86.2  | 40  | 0 |
| 1922 | 6  | 13 | 18 | 1 | NOT NAMED | 18.8 | 87.1  | 35  | 0 |
| 1922 | 6  | 14 | 0  | 1 | NOT NAMED | 19.2 | 88.1  | 35  | 0 |
| 1922 | 6  | 14 | 6  | 1 | NOT NAMED | 19.6 | 89.0  | 35  | 0 |
| 1922 | 6  | 14 | 12 | 1 | NOT NAMED | 20.1 | 90.0  | 35  | 0 |
| 1922 | 6  | 14 | 18 | 1 | NOT NAMED | 20.6 | 91.1  | 35  | 0 |
| 1922 | 6  | 15 | 0  | 1 | NOT NAMED | 21.0 | 92.4  | 35  | 0 |
| 1922 | 6  | 15 | 6  | 1 | NOT NAMED | 21.5 | 93.8  | 40  | 0 |
| 1922 | 6  | 15 | 12 | 1 | NOT NAMED | 22.0 | 95.0  | 40  | 0 |
| 1922 | 6  | 15 | 18 | 1 | NOT NAMED | 22.7 | 96.0  | 45  | 0 |
| 1922 | 6  | 16 | 0  | 1 | NOT NAMED | 23.3 | 96.8  | 45  | 0 |
| 1922 | 6  | 16 | 6  | 1 | NOT NAMED | 24.1 | 97.6  | 40  | 0 |
| 1922 | 6  | 16 | 12 | 1 | NOT NAMED | 24.9 | 98.2  | 35  | 0 |
| 1922 | 6  | 16 | 18 | 1 | NOT NAMED | 27.5 | 100.0 | 30  | 0 |
| 1922 | 9  | 13 | 0  | 2 | NOT NAMED | 10.4 | 46.8  | 35  | 0 |
| 1922 | 9  | 13 | 6  | 2 | NOT NAMED | 10.7 | 48.8  | 35  | 0 |
| 1922 | 9  | 13 | 12 | 2 | NOT NAMED | 11.0 | 50.0  | 40  | 0 |
| 1922 | 9  | 13 | 18 | 2 | NOT NAMED | 11.2 | 50.9  | 40  | 0 |
| 1922 | 9  | 14 | 0  | 2 | NOT NAMED | 11.6 | 51.9  | 45  | 0 |
| 1922 | 9  | 14 | 6  | 2 | NOT NAMED | 12.0 | 52.9  | 50  | 0 |
| 1922 | 9  | 14 | 12 | 2 | NOT NAMED | 12.6 | 54.0  | 50  | 0 |
| 1922 | 9  | 14 | 18 | 2 | NOT NAMED | 13.4 | 55.2  | 55  | 0 |
| 1922 | 9  | 15 | 0  | 2 | NOT NAMED | 14.2 | 56.4  | 60  | 0 |
| 1922 | 9  | 15 | 6  | 2 | NOT NAMED | 15.1 | 57.7  | 60  | 0 |
| 1922 | 9  | 15 | 12 | 2 | NOT NAMED | 15.8 | 58.8  | 65  | 0 |
| 1922 | 9  | 15 | 18 | 2 | NOT NAMED | 16.4 | 59.8  | 70  | 0 |
| 1922 | 9  | 16 | 0  | 2 | NOT NAMED | 17.0 | 60.9  | 80  | 0 |
| 1922 | 9  | 16 | 6  | 2 | NOT NAMED | 17.6 | 61.9  | 85  | 0 |
| 1922 | 9  | 16 | 12 | 2 | NOT NAMED | 18.1 | 62.9  | 90  | 0 |
| 1922 | 9  | 16 | 18 | 2 | NOT NAMED | 18.7 | 63.9  | 95  | 0 |
| 1922 | 9  | 17 | 0  | 2 | NOT NAMED | 19.3 | 64.9  | 100 | 0 |
| 1922 | 9  | 17 | 6  | 2 | NOT NAMED | 20.0 | 65.9  | 100 | 0 |
| 1922 | 9  | 17 | 12 | 2 | NOT NAMED | 20.6 | 66.8  | 105 | 0 |
| 1922 | 9  | 17 | 18 | 2 | NOT NAMED | 21.2 | 67.4  | 105 | 0 |
| 1922 | 9  | 18 | 0  | 2 | NOT NAMED | 21.9 | 67.9  | 105 | 0 |

|      |       |    |             |      |      |     |   |
|------|-------|----|-------------|------|------|-----|---|
| 1922 | 9 18  | 6  | 2 NOT NAMED | 22.5 | 68.1 | 110 | 0 |
| 1922 | 9 18  | 12 | 2 NOT NAMED | 23.2 | 68.2 | 110 | 0 |
| 1922 | 9 18  | 18 | 2 NOT NAMED | 24.0 | 68.2 | 115 | 0 |
| 1922 | 9 19  | 0  | 2 NOT NAMED | 24.9 | 68.1 | 115 | 0 |
| 1922 | 9 19  | 6  | 2 NOT NAMED | 25.8 | 68.0 | 115 | 0 |
| 1922 | 9 19  | 12 | 2 NOT NAMED | 26.5 | 67.8 | 120 | 0 |
| 1922 | 9 19  | 18 | 2 NOT NAMED | 27.3 | 67.3 | 120 | 0 |
| 1922 | 9 20  | 0  | 2 NOT NAMED | 27.9 | 67.0 | 125 | 0 |
| 1922 | 9 20  | 6  | 2 NOT NAMED | 28.6 | 66.5 | 125 | 0 |
| 1922 | 9 20  | 12 | 2 NOT NAMED | 29.2 | 66.0 | 125 | 0 |
| 1922 | 9 20  | 18 | 2 NOT NAMED | 29.9 | 65.5 | 130 | 0 |
| 1922 | 9 21  | 0  | 2 NOT NAMED | 30.6 | 65.0 | 130 | 0 |
| 1922 | 9 21  | 6  | 2 NOT NAMED | 31.3 | 64.3 | 130 | 0 |
| 1922 | 9 21  | 12 | 2 NOT NAMED | 32.1 | 63.2 | 130 | 0 |
| 1922 | 9 21  | 18 | 2 NOT NAMED | 33.5 | 61.5 | 130 | 0 |
| 1922 | 9 22  | 0  | 2 NOT NAMED | 35.8 | 59.0 | 130 | 0 |
| 1922 | 9 22  | 6  | 2 NOT NAMED | 38.2 | 56.4 | 125 | 0 |
| 1922 | 9 22  | 12 | 2 NOT NAMED | 40.0 | 54.0 | 115 | 0 |
| 1922 | 9 22  | 18 | 2 NOT NAMED | 41.2 | 52.3 | 105 | 0 |
| 1922 | 9 23  | 0  | 2 NOT NAMED | 42.3 | 50.6 | 95  | 0 |
| 1922 | 9 23  | 6  | 2 NOT NAMED | 43.4 | 49.0 | 95  | 0 |
| 1922 | 9 23  | 12 | 2 NOT NAMED | 44.6 | 46.5 | 90  | 0 |
| 1922 | 9 23  | 18 | 2 NOT NAMED | 45.9 | 43.2 | 90  | 0 |
| 1922 | 9 24  | 0  | 2 NOT NAMED | 47.3 | 39.0 | 90  | 0 |
| 1922 | 9 24  | 6  | 2 NOT NAMED | 48.7 | 34.4 | 85  | 0 |
| 1922 | 9 24  | 12 | 2 NOT NAMED | 49.8 | 30.0 | 85  | 0 |
| 1922 | 9 24  | 18 | 2 NOT NAMED | 50.2 | 27.7 | 80  | 0 |
| 1922 | 9 25  | 0  | 2 NOT NAMED | 50.5 | 25.5 | 80  | 0 |
| 1922 | 9 25  | 6  | 2 NOT NAMED | 50.8 | 22.2 | 80  | 0 |
| 1922 | 9 25  | 12 | 2 NOT NAMED | 51.0 | 20.4 | 75  | 0 |
| 1922 | 9 25  | 18 | 2 NOT NAMED | 51.1 | 19.1 | 75  | 0 |
| 1922 | 9 26  | 0  | 2 NOT NAMED | 51.1 | 17.6 | 70  | 0 |
| 1922 | 9 26  | 6  | 2 NOT NAMED | 51.1 | 15.8 | 70  | 0 |
| 1922 | 9 26  | 12 | 2 NOT NAMED | 51.0 | 14.0 | 70  | 0 |
| 1922 | 9 26  | 18 | 2 NOT NAMED | 50.9 | 10.1 | 70  | 0 |
| 1922 | 10 12 | 0  | 3 NOT NAMED | 16.2 | 83.0 | 35  | 0 |
| 1922 | 10 12 | 6  | 3 NOT NAMED | 16.8 | 82.1 | 35  | 0 |
| 1922 | 10 12 | 12 | 3 NOT NAMED | 17.5 | 81.8 | 35  | 0 |
| 1922 | 10 12 | 18 | 3 NOT NAMED | 18.0 | 81.7 | 35  | 0 |
| 1922 | 10 13 | 0  | 3 NOT NAMED | 18.6 | 81.7 | 40  | 0 |
| 1922 | 10 13 | 6  | 3 NOT NAMED | 19.2 | 81.8 | 40  | 0 |
| 1922 | 10 13 | 12 | 3 NOT NAMED | 19.8 | 82.0 | 35  | 0 |
| 1922 | 10 13 | 18 | 3 NOT NAMED | 20.5 | 82.4 | 40  | 0 |
| 1922 | 10 14 | 0  | 3 NOT NAMED | 21.2 | 82.8 | 40  | 0 |

|            |    |             |      |      |    |   |
|------------|----|-------------|------|------|----|---|
| 1922 10 14 | 6  | 3 NOT NAMED | 22.0 | 83.3 | 40 | 0 |
| 1922 10 14 | 12 | 3 NOT NAMED | 22.8 | 83.7 | 40 | 0 |
| 1922 10 14 | 18 | 3 NOT NAMED | 23.7 | 84.1 | 40 | 0 |
| 1922 10 15 | 0  | 3 NOT NAMED | 24.8 | 84.5 | 45 | 0 |
| 1922 10 15 | 6  | 3 NOT NAMED | 25.8 | 84.9 | 45 | 0 |
| 1922 10 15 | 12 | 3 NOT NAMED | 26.6 | 85.3 | 45 | 0 |
| 1922 10 15 | 18 | 3 NOT NAMED | 27.3 | 85.7 | 45 | 0 |
| 1922 10 16 | 0  | 3 NOT NAMED | 27.9 | 86.1 | 45 | 0 |
| 1922 10 16 | 6  | 3 NOT NAMED | 28.4 | 86.4 | 45 | 0 |
| 1922 10 16 | 12 | 3 NOT NAMED | 28.9 | 86.8 | 45 | 0 |
| 1922 10 16 | 18 | 3 NOT NAMED | 29.4 | 87.1 | 45 | 0 |
| 1922 10 17 | 0  | 3 NOT NAMED | 29.9 | 87.4 | 40 | 0 |
| 1922 10 17 | 6  | 3 NOT NAMED | 30.4 | 87.7 | 40 | 0 |
| 1922 10 17 | 12 | 3 NOT NAMED | 30.8 | 87.9 | 35 | 0 |
| 1922 10 17 | 18 | 3 NOT NAMED | 31.2 | 88.2 | 30 | 0 |
| 1922 10 14 | 0  | 4 NOT NAMED | 16.4 | 80.4 | 35 | 0 |
| 1922 10 14 | 6  | 4 NOT NAMED | 16.7 | 80.7 | 35 | 0 |
| 1922 10 14 | 12 | 4 NOT NAMED | 17.0 | 81.0 | 35 | 0 |
| 1922 10 14 | 18 | 4 NOT NAMED | 17.2 | 81.1 | 35 | 0 |
| 1922 10 15 | 0  | 4 NOT NAMED | 17.4 | 81.3 | 35 | 0 |
| 1922 10 15 | 6  | 4 NOT NAMED | 17.6 | 81.5 | 35 | 0 |
| 1922 10 15 | 12 | 4 NOT NAMED | 17.9 | 81.7 | 35 | 0 |
| 1922 10 15 | 18 | 4 NOT NAMED | 18.2 | 82.0 | 40 | 0 |
| 1922 10 16 | 0  | 4 NOT NAMED | 18.5 | 82.3 | 40 | 0 |
| 1922 10 16 | 6  | 4 NOT NAMED | 18.8 | 82.6 | 45 | 0 |
| 1922 10 16 | 12 | 4 NOT NAMED | 19.1 | 83.0 | 50 | 0 |
| 1922 10 16 | 18 | 4 NOT NAMED | 19.4 | 83.4 | 50 | 0 |
| 1922 10 17 | 0  | 4 NOT NAMED | 19.8 | 83.9 | 60 | 0 |
| 1922 10 17 | 6  | 4 NOT NAMED | 20.1 | 84.3 | 65 | 0 |
| 1922 10 17 | 12 | 4 NOT NAMED | 20.4 | 84.8 | 75 | 0 |
| 1922 10 17 | 18 | 4 NOT NAMED | 20.7 | 85.3 | 85 | 0 |
| 1922 10 18 | 0  | 4 NOT NAMED | 20.9 | 85.7 | 85 | 0 |
| 1922 10 18 | 6  | 4 NOT NAMED | 21.0 | 86.2 | 80 | 0 |
| 1922 10 18 | 12 | 4 NOT NAMED | 21.0 | 86.7 | 70 | 0 |
| 1922 10 18 | 18 | 4 NOT NAMED | 21.0 | 87.2 | 70 | 0 |
| 1922 10 19 | 0  | 4 NOT NAMED | 21.1 | 87.8 | 70 | 0 |
| 1922 10 19 | 6  | 4 NOT NAMED | 20.9 | 88.5 | 70 | 0 |
| 1922 10 19 | 12 | 4 NOT NAMED | 20.8 | 89.0 | 70 | 0 |
| 1922 10 19 | 18 | 4 NOT NAMED | 20.7 | 89.5 | 70 | 0 |
| 1922 10 20 | 0  | 4 NOT NAMED | 20.6 | 89.9 | 75 | 0 |
| 1922 10 20 | 6  | 4 NOT NAMED | 20.4 | 90.3 | 80 | 0 |
| 1922 10 20 | 12 | 4 NOT NAMED | 20.2 | 90.7 | 80 | 0 |
| 1922 10 20 | 18 | 4 NOT NAMED | 20.0 | 91.1 | 80 | 0 |
| 1922 10 21 | 0  | 4 NOT NAMED | 19.8 | 91.4 | 80 | 0 |

|      |    |    |    |   |           |      |      |    |   |
|------|----|----|----|---|-----------|------|------|----|---|
| 1922 | 10 | 21 | 6  | 4 | NOT NAMED | 19.6 | 91.8 | 70 | 0 |
| 1922 | 10 | 21 | 12 | 4 | NOT NAMED | 19.4 | 92.1 | 65 | 0 |
| 1922 | 10 | 21 | 18 | 4 | NOT NAMED | 19.1 | 92.4 | 35 | 0 |
| 1922 | 10 | 22 | 0  | 4 | NOT NAMED | 18.7 | 92.7 | 35 | 0 |
| 1922 | 10 | 22 | 6  | 4 | NOT NAMED | 18.3 | 93.7 | 35 | 0 |
| 1923 | 8  | 30 | 18 | 1 | NOT NAMED | 24.7 | 69.0 | 35 | 0 |
| 1923 | 8  | 31 | 0  | 1 | NOT NAMED | 25.1 | 69.3 | 35 | 0 |
| 1923 | 8  | 31 | 6  | 1 | NOT NAMED | 25.7 | 69.6 | 35 | 0 |
| 1923 | 8  | 31 | 12 | 1 | NOT NAMED | 26.2 | 69.8 | 35 | 0 |
| 1923 | 8  | 31 | 18 | 1 | NOT NAMED | 26.5 | 70.0 | 35 | 0 |
| 1923 | 9  | 1  | 0  | 1 | NOT NAMED | 26.9 | 70.1 | 35 | 0 |
| 1923 | 9  | 1  | 6  | 1 | NOT NAMED | 27.3 | 70.1 | 35 | 0 |
| 1923 | 9  | 1  | 12 | 1 | NOT NAMED | 27.8 | 70.0 | 35 | 0 |
| 1923 | 9  | 1  | 18 | 1 | NOT NAMED | 28.4 | 69.9 | 35 | 0 |
| 1923 | 9  | 2  | 0  | 1 | NOT NAMED | 29.0 | 69.8 | 35 | 0 |
| 1923 | 9  | 2  | 6  | 1 | NOT NAMED | 29.6 | 69.6 | 40 | 0 |
| 1923 | 9  | 2  | 12 | 1 | NOT NAMED | 30.2 | 69.2 | 40 | 0 |
| 1923 | 9  | 2  | 18 | 1 | NOT NAMED | 30.8 | 68.8 | 40 | 0 |
| 1923 | 9  | 3  | 0  | 1 | NOT NAMED | 31.3 | 68.4 | 45 | 0 |
| 1923 | 9  | 3  | 6  | 1 | NOT NAMED | 31.9 | 67.9 | 45 | 0 |
| 1923 | 9  | 3  | 12 | 1 | NOT NAMED | 32.3 | 67.4 | 50 | 0 |
| 1923 | 9  | 3  | 18 | 1 | NOT NAMED | 32.6 | 66.9 | 50 | 0 |
| 1923 | 9  | 4  | 0  | 1 | NOT NAMED | 32.8 | 66.4 | 55 | 0 |
| 1923 | 9  | 4  | 6  | 1 | NOT NAMED | 33.0 | 65.9 | 55 | 0 |
| 1923 | 9  | 4  | 12 | 1 | NOT NAMED | 33.2 | 65.3 | 60 | 0 |
| 1923 | 9  | 4  | 18 | 1 | NOT NAMED | 33.4 | 64.5 | 60 | 0 |
| 1923 | 9  | 5  | 0  | 1 | NOT NAMED | 33.5 | 63.5 | 65 | 0 |
| 1923 | 9  | 5  | 6  | 1 | NOT NAMED | 33.6 | 62.4 | 70 | 0 |
| 1923 | 9  | 5  | 12 | 1 | NOT NAMED | 33.8 | 61.4 | 70 | 0 |
| 1923 | 9  | 5  | 18 | 1 | NOT NAMED | 34.2 | 60.6 | 75 | 0 |
| 1923 | 9  | 6  | 0  | 1 | NOT NAMED | 34.9 | 59.7 | 80 | 0 |
| 1923 | 9  | 6  | 6  | 1 | NOT NAMED | 35.5 | 59.3 | 80 | 0 |
| 1923 | 9  | 6  | 12 | 1 | NOT NAMED | 36.0 | 59.0 | 85 | 0 |
| 1923 | 9  | 6  | 18 | 1 | NOT NAMED | 36.3 | 58.8 | 85 | 0 |
| 1923 | 9  | 7  | 0  | 1 | NOT NAMED | 36.6 | 58.7 | 85 | 0 |
| 1923 | 9  | 7  | 6  | 1 | NOT NAMED | 36.8 | 58.7 | 90 | 0 |
| 1923 | 9  | 7  | 12 | 1 | NOT NAMED | 37.1 | 58.7 | 90 | 0 |
| 1923 | 9  | 7  | 18 | 1 | NOT NAMED | 37.4 | 58.7 | 85 | 0 |
| 1923 | 9  | 8  | 0  | 1 | NOT NAMED | 37.6 | 58.6 | 85 | 0 |
| 1923 | 9  | 8  | 6  | 1 | NOT NAMED | 37.8 | 58.6 | 80 | 0 |
| 1923 | 9  | 8  | 12 | 1 | NOT NAMED | 38.1 | 58.5 | 80 | 0 |
| 1923 | 9  | 8  | 18 | 1 | NOT NAMED | 38.5 | 58.5 | 75 | 0 |
| 1923 | 9  | 9  | 0  | 1 | NOT NAMED | 39.2 | 58.5 | 75 | 0 |
| 1923 | 9  | 9  | 6  | 1 | NOT NAMED | 40.1 | 58.5 | 70 | 0 |

|      |    |    |    |   |           |      |      |     |   |
|------|----|----|----|---|-----------|------|------|-----|---|
| 1923 | 9  | 9  | 12 | 1 | NOT NAMED | 41.0 | 58.5 | 70  | 0 |
| 1923 | 9  | 9  | 18 | 1 | NOT NAMED | 43.0 | 58.0 | 65  | 0 |
| 1923 | 9  | 10 | 0  | 1 | NOT NAMED | 45.8 | 56.8 | 55  | 0 |
| 1923 | 9  | 10 | 6  | 1 | NOT NAMED | 47.6 | 55.5 | 45  | 0 |
| 1923 | 9  | 24 | 6  | 2 | NOT NAMED | 20.3 | 68.3 | 55  | 0 |
| 1923 | 9  | 24 | 12 | 2 | NOT NAMED | 21.2 | 70.3 | 55  | 0 |
| 1923 | 9  | 24 | 18 | 2 | NOT NAMED | 21.6 | 71.3 | 60  | 0 |
| 1923 | 9  | 25 | 0  | 2 | NOT NAMED | 22.1 | 72.2 | 65  | 0 |
| 1923 | 9  | 25 | 6  | 2 | NOT NAMED | 22.6 | 72.9 | 70  | 0 |
| 1923 | 9  | 25 | 12 | 2 | NOT NAMED | 23.1 | 73.6 | 70  | 0 |
| 1923 | 9  | 25 | 18 | 2 | NOT NAMED | 23.7 | 74.5 | 75  | 0 |
| 1923 | 9  | 26 | 0  | 2 | NOT NAMED | 24.3 | 75.2 | 80  | 0 |
| 1923 | 9  | 26 | 6  | 2 | NOT NAMED | 24.8 | 75.7 | 80  | 0 |
| 1923 | 9  | 26 | 12 | 2 | NOT NAMED | 25.4 | 76.1 | 85  | 0 |
| 1923 | 9  | 26 | 18 | 2 | NOT NAMED | 26.0 | 76.3 | 85  | 0 |
| 1923 | 9  | 27 | 0  | 2 | NOT NAMED | 26.5 | 76.4 | 90  | 0 |
| 1923 | 9  | 27 | 6  | 2 | NOT NAMED | 27.1 | 76.4 | 90  | 0 |
| 1923 | 9  | 27 | 12 | 2 | NOT NAMED | 27.7 | 76.3 | 95  | 0 |
| 1923 | 9  | 27 | 18 | 2 | NOT NAMED | 28.3 | 76.1 | 95  | 0 |
| 1923 | 9  | 28 | 0  | 2 | NOT NAMED | 28.9 | 75.8 | 100 | 0 |
| 1923 | 9  | 28 | 6  | 2 | NOT NAMED | 29.6 | 75.3 | 100 | 0 |
| 1923 | 9  | 28 | 12 | 2 | NOT NAMED | 30.2 | 74.8 | 100 | 0 |
| 1923 | 9  | 28 | 18 | 2 | NOT NAMED | 30.7 | 74.3 | 105 | 0 |
| 1923 | 9  | 29 | 0  | 2 | NOT NAMED | 31.2 | 73.8 | 105 | 0 |
| 1923 | 9  | 29 | 6  | 2 | NOT NAMED | 31.6 | 73.3 | 105 | 0 |
| 1923 | 9  | 29 | 12 | 2 | NOT NAMED | 32.0 | 72.7 | 105 | 0 |
| 1923 | 9  | 29 | 18 | 2 | NOT NAMED | 32.5 | 71.9 | 105 | 0 |
| 1923 | 9  | 30 | 0  | 2 | NOT NAMED | 33.0 | 70.9 | 105 | 0 |
| 1923 | 9  | 30 | 6  | 2 | NOT NAMED | 33.7 | 69.6 | 100 | 0 |
| 1923 | 9  | 30 | 12 | 2 | NOT NAMED | 34.5 | 68.3 | 95  | 0 |
| 1923 | 9  | 30 | 18 | 2 | NOT NAMED | 35.5 | 66.5 | 95  | 0 |
| 1923 | 10 | 1  | 0  | 2 | NOT NAMED | 37.8 | 63.2 | 90  | 0 |
| 1923 | 10 | 1  | 6  | 2 | NOT NAMED | 39.1 | 61.9 | 90  | 0 |
| 1923 | 10 | 1  | 12 | 2 | NOT NAMED | 41.7 | 60.1 | 85  | 0 |
| 1923 | 10 | 1  | 18 | 2 | NOT NAMED | 43.0 | 59.5 | 80  | 0 |
| 1923 | 10 | 2  | 0  | 2 | NOT NAMED | 44.3 | 59.0 | 75  | 0 |
| 1923 | 10 | 2  | 6  | 2 | NOT NAMED | 45.6 | 58.6 | 70  | 0 |
| 1923 | 10 | 2  | 12 | 2 | NOT NAMED | 47.0 | 58.0 | 70  | 0 |
| 1923 | 10 | 2  | 18 | 2 | NOT NAMED | 48.6 | 57.0 | 60  | 0 |
| 1923 | 10 | 3  | 0  | 2 | NOT NAMED | 50.4 | 54.8 | 55  | 0 |
| 1923 | 10 | 3  | 6  | 2 | NOT NAMED | 52.1 | 52.8 | 50  | 0 |
| 1923 | 10 | 3  | 12 | 2 | NOT NAMED | 53.7 | 50.6 | 45  | 0 |
| 1923 | 10 | 3  | 18 | 2 | NOT NAMED | 55.2 | 48.2 | 40  | 0 |
| 1923 | 10 | 4  | 0  | 2 | NOT NAMED | 56.5 | 45.6 | 40  | 0 |



|      |    |    |    |             |      |      |    |   |
|------|----|----|----|-------------|------|------|----|---|
| 1923 | 10 | 4  | 6  | 2 NOT NAMED | 57.8 | 42.9 | 40 | 0 |
| 1923 | 10 | 4  | 12 | 2 NOT NAMED | 59.0 | 40.0 | 40 | 0 |
| 1923 | 10 | 4  | 18 | 2 NOT NAMED | 61.0 | 34.0 | 40 | 0 |
| 1923 | 10 | 12 | 6  | 3 NOT NAMED | 10.4 | 92.0 | 35 | 0 |
| 1923 | 10 | 12 | 12 | 3 NOT NAMED | 11.9 | 93.8 | 35 | 0 |
| 1923 | 10 | 12 | 18 | 3 NOT NAMED | 13.4 | 94.4 | 35 | 0 |
| 1923 | 10 | 13 | 0  | 3 NOT NAMED | 14.8 | 94.8 | 40 | 0 |
| 1923 | 10 | 13 | 6  | 3 NOT NAMED | 16.0 | 95.1 | 40 | 0 |
| 1923 | 10 | 13 | 12 | 3 NOT NAMED | 17.1 | 95.3 | 35 | 0 |
| 1923 | 10 | 13 | 18 | 3 NOT NAMED | 18.0 | 95.4 | 40 | 0 |
| 1923 | 10 | 14 | 0  | 3 NOT NAMED | 18.9 | 95.3 | 45 | 0 |
| 1923 | 10 | 14 | 6  | 3 NOT NAMED | 19.8 | 95.0 | 55 | 0 |
| 1923 | 10 | 14 | 12 | 3 NOT NAMED | 20.7 | 94.7 | 65 | 0 |
| 1923 | 10 | 14 | 18 | 3 NOT NAMED | 21.6 | 94.2 | 70 | 0 |
| 1923 | 10 | 15 | 0  | 3 NOT NAMED | 22.4 | 93.7 | 75 | 0 |
| 1923 | 10 | 15 | 6  | 3 NOT NAMED | 23.3 | 93.2 | 80 | 0 |
| 1923 | 10 | 15 | 12 | 3 NOT NAMED | 24.2 | 92.7 | 85 | 0 |
| 1923 | 10 | 15 | 18 | 3 NOT NAMED | 25.6 | 91.8 | 85 | 0 |
| 1923 | 10 | 16 | 0  | 3 NOT NAMED | 27.7 | 91.1 | 85 | 0 |
| 1923 | 10 | 16 | 6  | 3 NOT NAMED | 30.0 | 91.2 | 60 | 0 |
| 1923 | 10 | 16 | 12 | 3 NOT NAMED | 32.0 | 91.6 | 40 | 0 |
| 1923 | 10 | 16 | 18 | 3 NOT NAMED | 33.7 | 91.7 | 35 | 0 |
| 1923 | 10 | 17 | 0  | 3 NOT NAMED | 35.2 | 91.8 | 30 | 0 |
| 1923 | 10 | 17 | 6  | 3 NOT NAMED | 36.8 | 91.9 | 30 | 0 |
| 1923 | 10 | 17 | 12 | 3 NOT NAMED | 38.5 | 92.0 | 30 | 0 |
| 1923 | 10 | 14 | 12 | 4 NOT NAMED | 10.4 | 80.3 | 35 | 0 |
| 1923 | 10 | 14 | 18 | 4 NOT NAMED | 10.8 | 80.2 | 35 | 0 |
| 1923 | 10 | 15 | 0  | 4 NOT NAMED | 11.2 | 80.2 | 35 | 0 |
| 1923 | 10 | 15 | 6  | 4 NOT NAMED | 11.7 | 80.1 | 35 | 0 |
| 1923 | 10 | 15 | 12 | 4 NOT NAMED | 12.3 | 80.1 | 35 | 0 |
| 1923 | 10 | 15 | 18 | 4 NOT NAMED | 13.0 | 80.1 | 35 | 0 |
| 1923 | 10 | 16 | 0  | 4 NOT NAMED | 13.8 | 80.2 | 35 | 0 |
| 1923 | 10 | 16 | 6  | 4 NOT NAMED | 14.6 | 80.3 | 35 | 0 |
| 1923 | 10 | 16 | 12 | 4 NOT NAMED | 15.2 | 80.4 | 35 | 0 |
| 1923 | 10 | 16 | 18 | 4 NOT NAMED | 15.6 | 80.5 | 35 | 0 |
| 1923 | 10 | 17 | 0  | 4 NOT NAMED | 16.0 | 80.5 | 35 | 0 |
| 1923 | 10 | 17 | 6  | 4 NOT NAMED | 16.3 | 80.6 | 35 | 0 |
| 1923 | 10 | 17 | 12 | 4 NOT NAMED | 16.7 | 80.7 | 35 | 0 |
| 1923 | 10 | 17 | 18 | 4 NOT NAMED | 17.1 | 80.7 | 35 | 0 |
| 1923 | 10 | 18 | 0  | 4 NOT NAMED | 17.4 | 80.8 | 35 | 0 |
| 1923 | 10 | 18 | 6  | 4 NOT NAMED | 17.7 | 80.9 | 35 | 0 |
| 1923 | 10 | 18 | 12 | 4 NOT NAMED | 18.1 | 80.8 | 35 | 0 |
| 1923 | 10 | 18 | 18 | 4 NOT NAMED | 18.5 | 80.7 | 35 | 0 |
| 1923 | 10 | 19 | 0  | 4 NOT NAMED | 19.1 | 80.5 | 40 | 0 |

|      |    |    |    |             |      |      |    |   |
|------|----|----|----|-------------|------|------|----|---|
| 1923 | 10 | 19 | 6  | 4 NOT NAMED | 19.7 | 80.1 | 40 | 0 |
| 1923 | 10 | 19 | 12 | 4 NOT NAMED | 20.4 | 79.6 | 40 | 0 |
| 1923 | 10 | 19 | 18 | 4 NOT NAMED | 21.1 | 79.0 | 40 | 0 |
| 1923 | 10 | 20 | 0  | 4 NOT NAMED | 22.0 | 78.3 | 35 | 0 |
| 1923 | 10 | 20 | 6  | 4 NOT NAMED | 22.9 | 77.5 | 35 | 0 |
| 1923 | 10 | 20 | 12 | 4 NOT NAMED | 23.9 | 77.0 | 35 | 0 |
| 1923 | 10 | 20 | 18 | 4 NOT NAMED | 25.2 | 76.7 | 40 | 0 |
| 1923 | 10 | 21 | 0  | 4 NOT NAMED | 26.7 | 76.6 | 40 | 0 |
| 1923 | 10 | 21 | 6  | 4 NOT NAMED | 28.1 | 76.4 | 40 | 0 |
| 1923 | 10 | 21 | 12 | 4 NOT NAMED | 29.2 | 76.2 | 45 | 0 |
| 1923 | 10 | 21 | 18 | 4 NOT NAMED | 29.9 | 75.8 | 50 | 0 |
| 1923 | 10 | 22 | 0  | 4 NOT NAMED | 30.6 | 75.3 | 55 | 0 |
| 1923 | 10 | 22 | 6  | 4 NOT NAMED | 31.3 | 74.8 | 60 | 0 |
| 1923 | 10 | 22 | 12 | 4 NOT NAMED | 32.0 | 74.4 | 60 | 0 |
| 1923 | 10 | 22 | 18 | 4 NOT NAMED | 32.6 | 74.2 | 60 | 0 |
| 1923 | 10 | 23 | 0  | 4 NOT NAMED | 33.3 | 74.2 | 60 | 0 |
| 1923 | 10 | 23 | 6  | 4 NOT NAMED | 33.9 | 74.3 | 60 | 0 |
| 1923 | 10 | 23 | 12 | 4 NOT NAMED | 34.6 | 74.6 | 60 | 0 |
| 1923 | 10 | 23 | 18 | 4 NOT NAMED | 35.7 | 75.1 | 55 | 0 |
| 1923 | 10 | 24 | 0  | 4 NOT NAMED | 37.4 | 75.6 | 50 | 0 |
| 1923 | 10 | 24 | 6  | 4 NOT NAMED | 39.2 | 76.0 | 45 | 0 |
| 1923 | 10 | 24 | 12 | 4 NOT NAMED | 40.8 | 76.1 | 40 | 0 |
| 1923 | 10 | 24 | 18 | 4 NOT NAMED | 42.2 | 76.5 | 35 | 0 |
| 1923 | 10 | 25 | 0  | 4 NOT NAMED | 43.6 | 76.9 | 35 | 0 |
| 1923 | 10 | 25 | 6  | 4 NOT NAMED | 44.8 | 76.7 | 30 | 0 |
| 1923 | 10 | 25 | 12 | 4 NOT NAMED | 46.3 | 75.8 | 30 | 0 |
| 1923 | 10 | 25 | 18 | 4 NOT NAMED | 47.5 | 73.1 | 25 | 0 |
| 1923 | 10 | 26 | 0  | 4 NOT NAMED | 48.0 | 69.5 | 25 | 0 |
| 1923 | 10 | 26 | 6  | 4 NOT NAMED | 48.2 | 65.7 | 25 | 0 |
| 1923 | 10 | 26 | 12 | 4 NOT NAMED | 48.5 | 62.5 | 30 | 0 |
| 1923 | 10 | 26 | 18 | 4 NOT NAMED | 49.3 | 59.8 | 30 | 0 |
| 1923 | 10 | 27 | 0  | 4 NOT NAMED | 50.1 | 57.2 | 35 | 0 |
| 1923 | 10 | 27 | 6  | 4 NOT NAMED | 50.9 | 54.5 | 35 | 0 |
| 1923 | 10 | 27 | 12 | 4 NOT NAMED | 51.7 | 51.7 | 35 | 0 |
| 1923 | 10 | 27 | 18 | 4 NOT NAMED | 52.5 | 48.8 | 40 | 0 |
| 1923 | 10 | 28 | 0  | 4 NOT NAMED | 53.4 | 45.9 | 40 | 0 |
| 1923 | 10 | 28 | 6  | 4 NOT NAMED | 54.2 | 43.0 | 40 | 0 |
| 1923 | 10 | 28 | 12 | 4 NOT NAMED | 55.0 | 40.0 | 40 | 0 |
| 1923 | 10 | 28 | 18 | 4 NOT NAMED | 55.7 | 37.9 | 45 | 0 |
| 1923 | 10 | 29 | 0  | 4 NOT NAMED | 56.4 | 36.0 | 45 | 0 |
| 1923 | 10 | 29 | 6  | 4 NOT NAMED | 57.0 | 34.4 | 45 | 0 |
| 1923 | 10 | 29 | 12 | 4 NOT NAMED | 57.6 | 32.6 | 45 | 0 |
| 1923 | 10 | 29 | 18 | 4 NOT NAMED | 58.5 | 29.3 | 40 | 0 |
| 1923 | 10 | 15 | 0  | 5 NOT NAMED | 21.6 | 63.8 | 35 | 0 |

|      |    |    |    |             |      |      |    |   |
|------|----|----|----|-------------|------|------|----|---|
| 1923 | 10 | 15 | 6  | 5 NOT NAMED | 22.7 | 63.0 | 35 | 0 |
| 1923 | 10 | 15 | 12 | 5 NOT NAMED | 23.6 | 62.3 | 35 | 0 |
| 1923 | 10 | 15 | 18 | 5 NOT NAMED | 25.0 | 61.5 | 35 | 0 |
| 1923 | 10 | 16 | 0  | 5 NOT NAMED | 26.4 | 60.9 | 35 | 0 |
| 1923 | 10 | 16 | 6  | 5 NOT NAMED | 27.7 | 60.6 | 35 | 0 |
| 1923 | 10 | 16 | 12 | 5 NOT NAMED | 28.9 | 60.3 | 35 | 0 |
| 1923 | 10 | 16 | 18 | 5 NOT NAMED | 30.0 | 60.3 | 35 | 0 |
| 1923 | 10 | 17 | 0  | 5 NOT NAMED | 31.0 | 60.6 | 35 | 0 |
| 1923 | 10 | 17 | 6  | 5 NOT NAMED | 32.0 | 61.2 | 35 | 0 |
| 1923 | 10 | 17 | 12 | 5 NOT NAMED | 33.1 | 62.0 | 40 | 0 |
| 1923 | 10 | 17 | 18 | 5 NOT NAMED | 34.3 | 63.3 | 40 | 0 |
| 1923 | 10 | 18 | 0  | 5 NOT NAMED | 35.5 | 65.0 | 40 | 0 |
| 1923 | 10 | 18 | 6  | 5 NOT NAMED | 36.6 | 66.7 | 40 | 0 |
| 1923 | 10 | 18 | 12 | 5 NOT NAMED | 37.8 | 68.0 | 45 | 0 |
| 1923 | 10 | 18 | 18 | 5 NOT NAMED | 39.0 | 69.0 | 45 | 0 |
| 1923 | 10 | 19 | 0  | 5 NOT NAMED | 40.2 | 69.8 | 45 | 0 |
| 1923 | 10 | 19 | 6  | 5 NOT NAMED | 41.3 | 70.5 | 40 | 0 |
| 1923 | 10 | 19 | 12 | 5 NOT NAMED | 42.5 | 71.0 | 35 | 0 |
| 1923 | 10 | 19 | 18 | 5 NOT NAMED | 43.7 | 71.3 | 30 | 0 |
| 1923 | 10 | 16 | 12 | 6 NOT NAMED | 21.3 | 92.9 | 35 | 0 |
| 1923 | 10 | 16 | 18 | 6 NOT NAMED | 22.0 | 91.9 | 35 | 0 |
| 1923 | 10 | 17 | 0  | 6 NOT NAMED | 22.9 | 91.3 | 35 | 0 |
| 1923 | 10 | 17 | 6  | 6 NOT NAMED | 24.2 | 90.5 | 40 | 0 |
| 1923 | 10 | 17 | 12 | 6 NOT NAMED | 26.0 | 89.5 | 45 | 0 |
| 1923 | 10 | 17 | 18 | 6 NOT NAMED | 28.2 | 88.9 | 45 | 0 |
| 1923 | 10 | 18 | 0  | 6 NOT NAMED | 30.6 | 89.0 | 40 | 0 |
| 1923 | 10 | 18 | 6  | 6 NOT NAMED | 32.9 | 89.2 | 35 | 0 |
| 1923 | 10 | 18 | 12 | 6 NOT NAMED | 35.1 | 89.5 | 30 | 0 |
| 1923 | 10 | 18 | 18 | 6 NOT NAMED | 37.2 | 88.7 | 25 | 0 |
| 1923 | 10 | 19 | 0  | 6 NOT NAMED | 39.4 | 87.5 | 25 | 0 |
| 1923 | 10 | 19 | 6  | 6 NOT NAMED | 41.5 | 85.9 | 25 | 0 |
| 1923 | 10 | 19 | 12 | 6 NOT NAMED | 43.5 | 84.0 | 25 | 0 |
| 1923 | 10 | 19 | 18 | 6 NOT NAMED | 46.2 | 81.5 | 25 | 0 |
| 1923 | 10 | 24 | 6  | 7 NOT NAMED | 18.3 | 61.2 | 35 | 0 |
| 1923 | 10 | 24 | 12 | 7 NOT NAMED | 19.0 | 61.0 | 35 | 0 |
| 1923 | 10 | 24 | 18 | 7 NOT NAMED | 19.8 | 60.6 | 35 | 0 |
| 1923 | 10 | 25 | 0  | 7 NOT NAMED | 20.7 | 60.5 | 35 | 0 |
| 1923 | 10 | 25 | 6  | 7 NOT NAMED | 21.5 | 60.4 | 35 | 0 |
| 1923 | 10 | 25 | 12 | 7 NOT NAMED | 22.4 | 60.5 | 35 | 0 |
| 1923 | 10 | 25 | 18 | 7 NOT NAMED | 23.3 | 61.1 | 35 | 0 |
| 1923 | 10 | 26 | 0  | 7 NOT NAMED | 24.2 | 62.2 | 40 | 0 |
| 1923 | 10 | 26 | 6  | 7 NOT NAMED | 25.1 | 63.8 | 45 | 0 |
| 1923 | 10 | 26 | 12 | 7 NOT NAMED | 26.1 | 65.6 | 45 | 0 |
| 1923 | 10 | 26 | 18 | 7 NOT NAMED | 27.4 | 66.6 | 45 | 0 |

|      |    |    |    |             |      |      |     |   |
|------|----|----|----|-------------|------|------|-----|---|
| 1923 | 10 | 27 | 0  | 7 NOT NAMED | 28.7 | 66.9 | 45  | 0 |
| 1923 | 10 | 27 | 6  | 7 NOT NAMED | 32.0 | 64.3 | 45  | 0 |
| 1924 | 6  | 18 | 12 | 1 NOT NAMED | 17.6 | 87.6 | 40  | 0 |
| 1924 | 6  | 18 | 18 | 1 NOT NAMED | 18.0 | 88.5 | 35  | 0 |
| 1924 | 6  | 19 | 0  | 1 NOT NAMED | 18.4 | 89.5 | 35  | 0 |
| 1924 | 6  | 19 | 6  | 1 NOT NAMED | 18.7 | 90.4 | 35  | 0 |
| 1924 | 6  | 19 | 12 | 1 NOT NAMED | 19.0 | 91.3 | 35  | 0 |
| 1924 | 6  | 19 | 18 | 1 NOT NAMED | 19.3 | 92.2 | 40  | 0 |
| 1924 | 6  | 20 | 0  | 1 NOT NAMED | 19.5 | 93.1 | 40  | 0 |
| 1924 | 6  | 20 | 6  | 1 NOT NAMED | 19.7 | 93.9 | 40  | 0 |
| 1924 | 6  | 20 | 12 | 1 NOT NAMED | 20.0 | 94.8 | 40  | 0 |
| 1924 | 6  | 20 | 18 | 1 NOT NAMED | 20.3 | 95.8 | 40  | 0 |
| 1924 | 6  | 21 | 0  | 1 NOT NAMED | 20.6 | 96.8 | 40  | 0 |
| 1924 | 6  | 21 | 6  | 1 NOT NAMED | 20.9 | 97.9 | 40  | 0 |
| 1924 | 6  | 21 | 12 | 1 NOT NAMED | 21.2 | 99.0 | 35  | 0 |
| 1924 | 6  | 21 | 18 | 1 NOT NAMED | 21.4 | 99.8 | 25  | 0 |
| 1924 | 8  | 16 | 6  | 2 NOT NAMED | 10.5 | 54.0 | 35  | 0 |
| 1924 | 8  | 16 | 12 | 2 NOT NAMED | 11.0 | 55.2 | 35  | 0 |
| 1924 | 8  | 16 | 18 | 2 NOT NAMED | 11.5 | 56.1 | 35  | 0 |
| 1924 | 8  | 17 | 0  | 2 NOT NAMED | 12.0 | 57.0 | 35  | 0 |
| 1924 | 8  | 17 | 6  | 2 NOT NAMED | 12.6 | 58.0 | 35  | 0 |
| 1924 | 8  | 17 | 12 | 2 NOT NAMED | 13.4 | 59.1 | 35  | 0 |
| 1924 | 8  | 17 | 18 | 2 NOT NAMED | 14.2 | 60.4 | 35  | 0 |
| 1924 | 8  | 18 | 0  | 2 NOT NAMED | 15.0 | 61.3 | 35  | 0 |
| 1924 | 8  | 18 | 6  | 2 NOT NAMED | 15.9 | 62.6 | 35  | 0 |
| 1924 | 8  | 18 | 12 | 2 NOT NAMED | 16.8 | 63.5 | 35  | 0 |
| 1924 | 8  | 18 | 18 | 2 NOT NAMED | 17.6 | 64.5 | 40  | 0 |
| 1924 | 8  | 19 | 0  | 2 NOT NAMED | 18.5 | 65.5 | 40  | 0 |
| 1924 | 8  | 19 | 6  | 2 NOT NAMED | 19.4 | 66.4 | 40  | 0 |
| 1924 | 8  | 19 | 12 | 2 NOT NAMED | 20.2 | 67.2 | 45  | 0 |
| 1924 | 8  | 19 | 18 | 2 NOT NAMED | 21.0 | 67.9 | 45  | 0 |
| 1924 | 8  | 20 | 0  | 2 NOT NAMED | 21.7 | 68.5 | 50  | 0 |
| 1924 | 8  | 20 | 6  | 2 NOT NAMED | 22.5 | 69.1 | 55  | 0 |
| 1924 | 8  | 20 | 12 | 2 NOT NAMED | 23.2 | 69.8 | 60  | 0 |
| 1924 | 8  | 20 | 18 | 2 NOT NAMED | 24.0 | 70.6 | 60  | 0 |
| 1924 | 8  | 21 | 0  | 2 NOT NAMED | 25.0 | 71.5 | 65  | 0 |
| 1924 | 8  | 21 | 6  | 2 NOT NAMED | 25.9 | 72.4 | 70  | 0 |
| 1924 | 8  | 21 | 12 | 2 NOT NAMED | 26.7 | 73.1 | 75  | 0 |
| 1924 | 8  | 21 | 18 | 2 NOT NAMED | 27.3 | 73.7 | 80  | 0 |
| 1924 | 8  | 22 | 0  | 2 NOT NAMED | 27.6 | 74.0 | 85  | 0 |
| 1924 | 8  | 22 | 6  | 2 NOT NAMED | 27.9 | 74.5 | 90  | 0 |
| 1924 | 8  | 22 | 12 | 2 NOT NAMED | 28.0 | 74.8 | 95  | 0 |
| 1924 | 8  | 22 | 18 | 2 NOT NAMED | 28.1 | 75.0 | 100 | 0 |
| 1924 | 8  | 23 | 0  | 2 NOT NAMED | 28.2 | 75.2 | 100 | 0 |

|      |      |    |             |      |      |     |   |
|------|------|----|-------------|------|------|-----|---|
| 1924 | 8 23 | 6  | 2 NOT NAMED | 28.2 | 75.4 | 105 | 0 |
| 1924 | 8 23 | 12 | 2 NOT NAMED | 28.3 | 75.6 | 105 | 0 |
| 1924 | 8 23 | 18 | 2 NOT NAMED | 28.3 | 75.9 | 105 | 0 |
| 1924 | 8 24 | 0  | 2 NOT NAMED | 28.2 | 76.2 | 110 | 0 |
| 1924 | 8 24 | 6  | 2 NOT NAMED | 28.2 | 76.6 | 110 | 0 |
| 1924 | 8 24 | 12 | 2 NOT NAMED | 28.2 | 76.9 | 110 | 0 |
| 1924 | 8 24 | 18 | 2 NOT NAMED | 28.2 | 77.5 | 115 | 0 |
| 1924 | 8 25 | 0  | 2 NOT NAMED | 29.8 | 77.1 | 115 | 0 |
| 1924 | 8 25 | 6  | 2 NOT NAMED | 30.7 | 76.9 | 115 | 0 |
| 1924 | 8 25 | 12 | 2 NOT NAMED | 31.8 | 76.5 | 115 | 0 |
| 1924 | 8 25 | 18 | 2 NOT NAMED | 33.0 | 76.0 | 110 | 0 |
| 1924 | 8 26 | 0  | 2 NOT NAMED | 34.4 | 75.5 | 110 | 0 |
| 1924 | 8 26 | 6  | 2 NOT NAMED | 36.0 | 74.3 | 105 | 0 |
| 1924 | 8 26 | 12 | 2 NOT NAMED | 37.9 | 72.9 | 100 | 0 |
| 1924 | 8 26 | 18 | 2 NOT NAMED | 40.6 | 70.3 | 90  | 0 |
| 1924 | 8 27 | 0  | 2 NOT NAMED | 43.5 | 67.2 | 85  | 0 |
| 1924 | 8 27 | 6  | 2 NOT NAMED | 46.3 | 63.1 | 80  | 0 |
| 1924 | 8 27 | 12 | 2 NOT NAMED | 48.2 | 59.8 | 75  | 0 |
| 1924 | 8 27 | 18 | 2 NOT NAMED | 49.8 | 56.0 | 65  | 0 |
| 1924 | 8 28 | 0  | 2 NOT NAMED | 51.8 | 52.6 | 55  | 0 |
| 1924 | 8 28 | 6  | 2 NOT NAMED | 53.8 | 48.8 | 50  | 0 |
| 1924 | 8 28 | 12 | 2 NOT NAMED | 55.3 | 45.2 | 45  | 0 |
| 1924 | 8 26 | 0  | 3 NOT NAMED | 13.7 | 50.0 | 35  | 0 |
| 1924 | 8 26 | 6  | 3 NOT NAMED | 13.7 | 53.2 | 35  | 0 |
| 1924 | 8 26 | 12 | 3 NOT NAMED | 13.8 | 54.6 | 35  | 0 |
| 1924 | 8 26 | 18 | 3 NOT NAMED | 14.0 | 55.8 | 35  | 0 |
| 1924 | 8 27 | 0  | 3 NOT NAMED | 14.4 | 57.0 | 40  | 0 |
| 1924 | 8 27 | 6  | 3 NOT NAMED | 14.9 | 58.1 | 40  | 0 |
| 1924 | 8 27 | 12 | 3 NOT NAMED | 15.3 | 59.0 | 45  | 0 |
| 1924 | 8 27 | 18 | 3 NOT NAMED | 15.6 | 59.8 | 50  | 0 |
| 1924 | 8 28 | 0  | 3 NOT NAMED | 16.1 | 60.6 | 55  | 0 |
| 1924 | 8 28 | 6  | 3 NOT NAMED | 16.6 | 61.3 | 65  | 0 |
| 1924 | 8 28 | 12 | 3 NOT NAMED | 17.1 | 62.0 | 65  | 0 |
| 1924 | 8 28 | 18 | 3 NOT NAMED | 17.6 | 62.7 | 70  | 0 |
| 1924 | 8 29 | 0  | 3 NOT NAMED | 18.3 | 63.4 | 75  | 0 |
| 1924 | 8 29 | 6  | 3 NOT NAMED | 19.0 | 64.0 | 80  | 0 |
| 1924 | 8 29 | 12 | 3 NOT NAMED | 19.6 | 64.6 | 80  | 0 |
| 1924 | 8 29 | 18 | 3 NOT NAMED | 19.9 | 64.9 | 85  | 0 |
| 1924 | 8 30 | 0  | 3 NOT NAMED | 20.2 | 65.1 | 85  | 0 |
| 1924 | 8 30 | 6  | 3 NOT NAMED | 20.4 | 65.3 | 85  | 0 |
| 1924 | 8 30 | 12 | 3 NOT NAMED | 20.7 | 65.6 | 85  | 0 |
| 1924 | 8 30 | 18 | 3 NOT NAMED | 21.1 | 65.8 | 85  | 0 |
| 1924 | 8 31 | 0  | 3 NOT NAMED | 21.4 | 66.0 | 90  | 0 |
| 1924 | 8 31 | 6  | 3 NOT NAMED | 21.8 | 66.2 | 90  | 0 |

|      |   |    |    |   |           |      |      |    |   |
|------|---|----|----|---|-----------|------|------|----|---|
| 1924 | 8 | 31 | 12 | 3 | NOT NAMED | 22.2 | 66.5 | 90 | 0 |
| 1924 | 8 | 31 | 18 | 3 | NOT NAMED | 22.6 | 66.8 | 90 | 0 |
| 1924 | 9 | 1  | 0  | 3 | NOT NAMED | 23.1 | 67.1 | 90 | 0 |
| 1924 | 9 | 1  | 6  | 3 | NOT NAMED | 23.6 | 67.5 | 90 | 0 |
| 1924 | 9 | 1  | 12 | 3 | NOT NAMED | 24.1 | 67.8 | 90 | 0 |
| 1924 | 9 | 1  | 18 | 3 | NOT NAMED | 24.6 | 68.1 | 90 | 0 |
| 1924 | 9 | 2  | 0  | 3 | NOT NAMED | 25.2 | 68.4 | 90 | 0 |
| 1924 | 9 | 2  | 6  | 3 | NOT NAMED | 25.8 | 68.6 | 90 | 0 |
| 1924 | 9 | 2  | 12 | 3 | NOT NAMED | 26.3 | 68.7 | 85 | 0 |
| 1924 | 9 | 2  | 18 | 3 | NOT NAMED | 27.2 | 68.8 | 85 | 0 |
| 1924 | 9 | 3  | 0  | 3 | NOT NAMED | 28.4 | 68.9 | 85 | 0 |
| 1924 | 9 | 3  | 6  | 3 | NOT NAMED | 30.0 | 68.8 | 80 | 0 |
| 1924 | 9 | 3  | 12 | 3 | NOT NAMED | 31.9 | 68.5 | 80 | 0 |
| 1924 | 9 | 3  | 18 | 3 | NOT NAMED | 34.1 | 68.0 | 80 | 0 |
| 1924 | 9 | 4  | 0  | 3 | NOT NAMED | 36.3 | 67.0 | 75 | 0 |
| 1924 | 9 | 4  | 6  | 3 | NOT NAMED | 38.6 | 66.0 | 75 | 0 |
| 1924 | 9 | 4  | 12 | 3 | NOT NAMED | 40.8 | 64.8 | 70 | 0 |
| 1924 | 9 | 4  | 18 | 3 | NOT NAMED | 43.0 | 63.1 | 70 | 0 |
| 1924 | 9 | 5  | 0  | 3 | NOT NAMED | 45.1 | 61.1 | 65 | 0 |
| 1924 | 9 | 5  | 6  | 3 | NOT NAMED | 47.2 | 58.7 | 55 | 0 |
| 1924 | 9 | 5  | 12 | 3 | NOT NAMED | 49.2 | 56.0 | 50 | 0 |
| 1924 | 9 | 5  | 18 | 3 | NOT NAMED | 50.6 | 52.4 | 45 | 0 |
| 1924 | 9 | 6  | 0  | 3 | NOT NAMED | 51.3 | 49.2 | 40 | 0 |
| 1924 | 9 | 6  | 6  | 3 | NOT NAMED | 52.0 | 46.0 | 35 | 0 |
| 1924 | 9 | 6  | 12 | 3 | NOT NAMED | 52.1 | 42.6 | 35 | 0 |
| 1924 | 9 | 6  | 18 | 3 | NOT NAMED | 51.8 | 36.2 | 35 | 0 |
| 1924 | 9 | 13 | 0  | 4 | NOT NAMED | 24.0 | 83.0 | 60 | 0 |
| 1924 | 9 | 13 | 6  | 4 | NOT NAMED | 25.4 | 85.2 | 60 | 0 |
| 1924 | 9 | 13 | 12 | 4 | NOT NAMED | 26.0 | 86.0 | 65 | 0 |
| 1924 | 9 | 13 | 18 | 4 | NOT NAMED | 26.6 | 86.6 | 70 | 0 |
| 1924 | 9 | 14 | 0  | 4 | NOT NAMED | 27.1 | 86.9 | 70 | 0 |
| 1924 | 9 | 14 | 6  | 4 | NOT NAMED | 27.7 | 87.2 | 70 | 0 |
| 1924 | 9 | 14 | 12 | 4 | NOT NAMED | 28.2 | 87.4 | 70 | 0 |
| 1924 | 9 | 14 | 18 | 4 | NOT NAMED | 28.7 | 87.4 | 70 | 0 |
| 1924 | 9 | 15 | 0  | 4 | NOT NAMED | 29.1 | 87.1 | 70 | 0 |
| 1924 | 9 | 15 | 6  | 4 | NOT NAMED | 29.6 | 86.5 | 65 | 0 |
| 1924 | 9 | 15 | 12 | 4 | NOT NAMED | 30.0 | 86.0 | 65 | 0 |
| 1924 | 9 | 15 | 18 | 4 | NOT NAMED | 30.3 | 85.5 | 55 | 0 |
| 1924 | 9 | 16 | 0  | 4 | NOT NAMED | 30.6 | 84.8 | 50 | 0 |
| 1924 | 9 | 16 | 6  | 4 | NOT NAMED | 31.0 | 83.9 | 45 | 0 |
| 1924 | 9 | 16 | 12 | 4 | NOT NAMED | 31.4 | 82.8 | 45 | 0 |
| 1924 | 9 | 16 | 18 | 4 | NOT NAMED | 31.9 | 81.3 | 40 | 0 |
| 1924 | 9 | 17 | 0  | 4 | NOT NAMED | 32.8 | 79.0 | 40 | 0 |
| 1924 | 9 | 17 | 6  | 4 | NOT NAMED | 34.0 | 77.0 | 40 | 0 |

|      |          |             |      |      |    |   |
|------|----------|-------------|------|------|----|---|
| 1924 | 9 17 12  | 4 NOT NAMED | 35.3 | 74.4 | 40 | 0 |
| 1924 | 9 17 18  | 4 NOT NAMED | 36.6 | 72.0 | 40 | 0 |
| 1924 | 9 18 0   | 4 NOT NAMED | 38.2 | 69.1 | 40 | 0 |
| 1924 | 9 18 6   | 4 NOT NAMED | 39.4 | 66.7 | 40 | 0 |
| 1924 | 9 18 12  | 4 NOT NAMED | 41.0 | 62.8 | 40 | 0 |
| 1924 | 9 18 18  | 4 NOT NAMED | 42.2 | 59.5 | 40 | 0 |
| 1924 | 9 19 0   | 4 NOT NAMED | 43.4 | 56.5 | 40 | 0 |
| 1924 | 9 19 6   | 4 NOT NAMED | 44.5 | 53.3 | 40 | 0 |
| 1924 | 9 19 12  | 4 NOT NAMED | 45.5 | 50.0 | 40 | 0 |
| 1924 | 9 19 18  | 4 NOT NAMED | 47.3 | 41.4 | 40 | 0 |
| 1924 | 9 27 6   | 5 NOT NAMED | 16.4 | 86.0 | 35 | 0 |
| 1924 | 9 27 12  | 5 NOT NAMED | 17.1 | 86.1 | 35 | 0 |
| 1924 | 9 27 18  | 5 NOT NAMED | 17.5 | 86.1 | 35 | 0 |
| 1924 | 9 28 0   | 5 NOT NAMED | 18.1 | 86.1 | 35 | 0 |
| 1924 | 9 28 6   | 5 NOT NAMED | 18.9 | 86.2 | 35 | 0 |
| 1924 | 9 28 12  | 5 NOT NAMED | 20.0 | 86.2 | 35 | 0 |
| 1924 | 9 28 18  | 5 NOT NAMED | 21.3 | 86.2 | 40 | 0 |
| 1924 | 9 29 0   | 5 NOT NAMED | 22.8 | 86.2 | 45 | 0 |
| 1924 | 9 29 6   | 5 NOT NAMED | 24.5 | 86.5 | 45 | 0 |
| 1924 | 9 29 12  | 5 NOT NAMED | 26.3 | 86.6 | 50 | 0 |
| 1924 | 9 29 18  | 5 NOT NAMED | 28.3 | 85.0 | 50 | 0 |
| 1924 | 9 30 0   | 5 NOT NAMED | 30.4 | 83.0 | 45 | 0 |
| 1924 | 9 30 6   | 5 NOT NAMED | 32.6 | 81.0 | 35 | 0 |
| 1924 | 9 30 12  | 5 NOT NAMED | 35.0 | 78.5 | 35 | 0 |
| 1924 | 9 30 18  | 5 NOT NAMED | 37.5 | 75.8 | 30 | 0 |
| 1924 | 10 12 6  | 6 NOT NAMED | 26.7 | 87.0 | 50 | 0 |
| 1924 | 10 12 12 | 6 NOT NAMED | 26.3 | 89.0 | 50 | 0 |
| 1924 | 10 12 18 | 6 NOT NAMED | 25.9 | 90.1 | 50 | 0 |
| 1924 | 10 13 0  | 6 NOT NAMED | 25.5 | 91.1 | 45 | 0 |
| 1924 | 10 13 6  | 6 NOT NAMED | 24.9 | 91.9 | 45 | 0 |
| 1924 | 10 13 12 | 6 NOT NAMED | 24.2 | 92.7 | 40 | 0 |
| 1924 | 10 13 18 | 6 NOT NAMED | 23.7 | 93.1 | 40 | 0 |
| 1924 | 10 14 0  | 6 NOT NAMED | 23.3 | 93.4 | 35 | 0 |
| 1924 | 10 14 6  | 6 NOT NAMED | 23.0 | 93.6 | 30 | 0 |
| 1924 | 10 14 12 | 6 NOT NAMED | 22.5 | 93.9 | 20 | 0 |
| 1924 | 10 14 0  | 7 NOT NAMED | 15.8 | 82.0 | 35 | 0 |
| 1924 | 10 14 6  | 7 NOT NAMED | 15.8 | 83.2 | 35 | 0 |
| 1924 | 10 14 12 | 7 NOT NAMED | 15.9 | 83.5 | 35 | 0 |
| 1924 | 10 14 18 | 7 NOT NAMED | 16.0 | 83.8 | 35 | 0 |
| 1924 | 10 15 0  | 7 NOT NAMED | 16.1 | 84.0 | 35 | 0 |
| 1924 | 10 15 6  | 7 NOT NAMED | 16.2 | 84.2 | 35 | 0 |
| 1924 | 10 15 12 | 7 NOT NAMED | 16.4 | 84.4 | 35 | 0 |
| 1924 | 10 15 18 | 7 NOT NAMED | 16.6 | 84.6 | 35 | 0 |
| 1924 | 10 16 0  | 7 NOT NAMED | 16.8 | 84.7 | 40 | 0 |

|      |    |    |    |             |      |      |     |   |
|------|----|----|----|-------------|------|------|-----|---|
| 1924 | 10 | 16 | 6  | 7 NOT NAMED | 17.0 | 84.8 | 45  | 0 |
| 1924 | 10 | 16 | 12 | 7 NOT NAMED | 17.3 | 84.9 | 45  | 0 |
| 1924 | 10 | 16 | 18 | 7 NOT NAMED | 17.6 | 85.0 | 50  | 0 |
| 1924 | 10 | 17 | 0  | 7 NOT NAMED | 17.8 | 85.1 | 50  | 0 |
| 1924 | 10 | 17 | 6  | 7 NOT NAMED | 18.1 | 85.2 | 55  | 0 |
| 1924 | 10 | 17 | 12 | 7 NOT NAMED | 18.4 | 85.2 | 60  | 0 |
| 1924 | 10 | 17 | 18 | 7 NOT NAMED | 18.7 | 85.2 | 60  | 0 |
| 1924 | 10 | 18 | 0  | 7 NOT NAMED | 19.0 | 85.2 | 65  | 0 |
| 1924 | 10 | 18 | 6  | 7 NOT NAMED | 19.3 | 85.2 | 70  | 0 |
| 1924 | 10 | 18 | 12 | 7 NOT NAMED | 19.6 | 85.1 | 75  | 0 |
| 1924 | 10 | 18 | 18 | 7 NOT NAMED | 20.0 | 85.1 | 80  | 0 |
| 1924 | 10 | 19 | 0  | 7 NOT NAMED | 20.4 | 85.0 | 90  | 0 |
| 1924 | 10 | 19 | 6  | 7 NOT NAMED | 20.9 | 84.9 | 95  | 0 |
| 1924 | 10 | 19 | 12 | 7 NOT NAMED | 21.5 | 84.8 | 100 | 0 |
| 1924 | 10 | 19 | 18 | 7 NOT NAMED | 22.3 | 84.6 | 105 | 0 |
| 1924 | 10 | 20 | 0  | 7 NOT NAMED | 23.2 | 84.3 | 105 | 0 |
| 1924 | 10 | 20 | 6  | 7 NOT NAMED | 24.1 | 83.9 | 100 | 0 |
| 1924 | 10 | 20 | 12 | 7 NOT NAMED | 24.8 | 83.4 | 95  | 0 |
| 1924 | 10 | 20 | 18 | 7 NOT NAMED | 25.3 | 82.7 | 90  | 0 |
| 1924 | 10 | 21 | 0  | 7 NOT NAMED | 25.7 | 82.0 | 80  | 0 |
| 1924 | 10 | 21 | 6  | 7 NOT NAMED | 26.0 | 81.0 | 60  | 0 |
| 1924 | 10 | 21 | 12 | 7 NOT NAMED | 26.2 | 80.2 | 55  | 0 |
| 1924 | 10 | 21 | 18 | 7 NOT NAMED | 26.6 | 79.2 | 50  | 0 |
| 1924 | 10 | 22 | 0  | 7 NOT NAMED | 27.0 | 77.6 | 50  | 0 |
| 1924 | 10 | 22 | 6  | 7 NOT NAMED | 27.2 | 76.0 | 45  | 0 |
| 1924 | 10 | 22 | 12 | 7 NOT NAMED | 28.0 | 73.5 | 40  | 0 |
| 1924 | 10 | 22 | 18 | 7 NOT NAMED | 28.7 | 71.5 | 40  | 0 |
| 1924 | 10 | 23 | 0  | 7 NOT NAMED | 29.5 | 69.9 | 35  | 0 |
| 1924 | 10 | 23 | 6  | 7 NOT NAMED | 30.6 | 67.9 | 30  | 0 |
| 1924 | 10 | 23 | 12 | 7 NOT NAMED | 31.8 | 66.6 | 25  | 0 |
| 1924 | 11 | 5  | 12 | 8 NOT NAMED | 13.0 | 80.0 | 35  | 0 |
| 1924 | 11 | 5  | 18 | 8 NOT NAMED | 13.2 | 79.5 | 35  | 0 |
| 1924 | 11 | 6  | 0  | 8 NOT NAMED | 13.5 | 79.0 | 35  | 0 |
| 1924 | 11 | 6  | 6  | 8 NOT NAMED | 13.8 | 78.6 | 35  | 0 |
| 1924 | 11 | 6  | 12 | 8 NOT NAMED | 14.3 | 78.3 | 35  | 0 |
| 1924 | 11 | 6  | 18 | 8 NOT NAMED | 14.9 | 78.1 | 35  | 0 |
| 1924 | 11 | 7  | 0  | 8 NOT NAMED | 15.5 | 77.8 | 35  | 0 |
| 1924 | 11 | 7  | 6  | 8 NOT NAMED | 16.1 | 77.7 | 35  | 0 |
| 1924 | 11 | 7  | 12 | 8 NOT NAMED | 16.7 | 77.5 | 35  | 0 |
| 1924 | 11 | 7  | 18 | 8 NOT NAMED | 17.3 | 77.4 | 35  | 0 |
| 1924 | 11 | 8  | 0  | 8 NOT NAMED | 17.8 | 77.3 | 35  | 0 |
| 1924 | 11 | 8  | 6  | 8 NOT NAMED | 18.4 | 77.2 | 40  | 0 |
| 1924 | 11 | 8  | 12 | 8 NOT NAMED | 18.9 | 77.0 | 40  | 0 |
| 1924 | 11 | 8  | 18 | 8 NOT NAMED | 19.3 | 76.8 | 40  | 0 |



|      |    |    |    |             |      |       |    |   |
|------|----|----|----|-------------|------|-------|----|---|
| 1924 | 11 | 9  | 0  | 8 NOT NAMED | 19.7 | 76.5  | 45 | 0 |
| 1924 | 11 | 9  | 6  | 8 NOT NAMED | 20.1 | 76.3  | 45 | 0 |
| 1924 | 11 | 9  | 12 | 8 NOT NAMED | 20.6 | 76.0  | 50 | 0 |
| 1924 | 11 | 9  | 18 | 8 NOT NAMED | 21.0 | 75.7  | 55 | 0 |
| 1924 | 11 | 10 | 0  | 8 NOT NAMED | 21.3 | 75.5  | 65 | 0 |
| 1924 | 11 | 10 | 6  | 8 NOT NAMED | 21.5 | 75.2  | 65 | 0 |
| 1924 | 11 | 10 | 12 | 8 NOT NAMED | 21.8 | 74.8  | 65 | 0 |
| 1924 | 11 | 10 | 18 | 8 NOT NAMED | 22.2 | 74.2  | 70 | 0 |
| 1924 | 11 | 11 | 0  | 8 NOT NAMED | 22.5 | 73.4  | 75 | 0 |
| 1924 | 11 | 11 | 6  | 8 NOT NAMED | 22.8 | 72.4  | 80 | 0 |
| 1924 | 11 | 11 | 12 | 8 NOT NAMED | 23.2 | 71.2  | 80 | 0 |
| 1924 | 11 | 11 | 18 | 8 NOT NAMED | 23.8 | 69.6  | 85 | 0 |
| 1924 | 11 | 12 | 0  | 8 NOT NAMED | 24.8 | 67.9  | 85 | 0 |
| 1924 | 11 | 12 | 6  | 8 NOT NAMED | 25.8 | 66.6  | 85 | 0 |
| 1924 | 11 | 12 | 12 | 8 NOT NAMED | 27.0 | 65.1  | 85 | 0 |
| 1924 | 11 | 12 | 18 | 8 NOT NAMED | 27.7 | 64.5  | 85 | 0 |
| 1924 | 11 | 13 | 0  | 8 NOT NAMED | 28.6 | 63.9  | 85 | 0 |
| 1924 | 11 | 13 | 6  | 8 NOT NAMED | 29.3 | 63.4  | 85 | 0 |
| 1924 | 11 | 13 | 12 | 8 NOT NAMED | 30.2 | 62.7  | 80 | 0 |
| 1924 | 11 | 13 | 18 | 8 NOT NAMED | 31.3 | 61.8  | 80 | 0 |
| 1924 | 11 | 14 | 0  | 8 NOT NAMED | 33.1 | 60.8  | 75 | 0 |
| 1924 | 11 | 14 | 6  | 8 NOT NAMED | 34.4 | 59.7  | 70 | 0 |
| 1924 | 11 | 14 | 12 | 8 NOT NAMED | 36.2 | 58.5  | 60 | 0 |
| 1924 | 11 | 14 | 18 | 8 NOT NAMED | 38.6 | 56.2  | 50 | 0 |
| 1924 | 11 | 15 | 0  | 8 NOT NAMED | 41.2 | 53.0  | 40 | 0 |
| 1924 | 11 | 15 | 6  | 8 NOT NAMED | 43.8 | 50.5  | 40 | 0 |
| 1925 | 9  | 6  | 0  | 1 NOT NAMED | 21.3 | 91.2  | 40 | 0 |
| 1925 | 9  | 6  | 6  | 1 NOT NAMED | 23.5 | 93.9  | 40 | 0 |
| 1925 | 9  | 6  | 12 | 1 NOT NAMED | 24.5 | 95.2  | 40 | 0 |
| 1925 | 9  | 6  | 18 | 1 NOT NAMED | 25.3 | 96.2  | 40 | 0 |
| 1925 | 9  | 7  | 0  | 1 NOT NAMED | 26.0 | 97.3  | 40 | 0 |
| 1925 | 9  | 7  | 6  | 1 NOT NAMED | 26.8 | 98.3  | 35 | 0 |
| 1925 | 9  | 7  | 12 | 1 NOT NAMED | 27.5 | 99.3  | 35 | 0 |
| 1925 | 9  | 7  | 18 | 1 NOT NAMED | 28.3 | 100.0 | 30 | 0 |
| 1925 | 11 | 29 | 6  | 2 NOT NAMED | 16.2 | 83.5  | 35 | 0 |
| 1925 | 11 | 29 | 12 | 2 NOT NAMED | 17.5 | 84.0  | 35 | 0 |
| 1925 | 11 | 29 | 18 | 2 NOT NAMED | 18.5 | 84.4  | 35 | 0 |
| 1925 | 11 | 30 | 0  | 2 NOT NAMED | 19.7 | 84.8  | 35 | 0 |
| 1925 | 11 | 30 | 6  | 2 NOT NAMED | 20.9 | 85.3  | 40 | 0 |
| 1925 | 11 | 30 | 12 | 2 NOT NAMED | 22.3 | 85.7  | 45 | 0 |
| 1925 | 11 | 30 | 18 | 2 NOT NAMED | 24.0 | 85.4  | 50 | 0 |
| 1925 | 12 | 1  | 0  | 2 NOT NAMED | 25.9 | 83.7  | 65 | 0 |
| 1925 | 12 | 1  | 6  | 2 NOT NAMED | 27.8 | 81.9  | 60 | 0 |
| 1925 | 12 | 1  | 12 | 2 NOT NAMED | 29.2 | 80.8  | 65 | 0 |

|      |    |    |    |             |      |      |     |     |
|------|----|----|----|-------------|------|------|-----|-----|
| 1925 | 12 | 1  | 18 | 2 NOT NAMED | 30.2 | 79.9 | 75  | 0   |
| 1925 | 12 | 2  | 0  | 2 NOT NAMED | 31.0 | 79.2 | 85  | 0   |
| 1925 | 12 | 2  | 6  | 2 NOT NAMED | 32.0 | 78.3 | 80  | 0   |
| 1925 | 12 | 2  | 12 | 2 NOT NAMED | 33.3 | 77.5 | 65  | 0   |
| 1925 | 12 | 2  | 18 | 2 NOT NAMED | 34.4 | 76.8 | 55  | 0   |
| 1925 | 12 | 3  | 0  | 2 NOT NAMED | 35.5 | 76.0 | 45  | 0   |
| 1925 | 12 | 3  | 6  | 2 NOT NAMED | 36.5 | 75.2 | 40  | 0   |
| 1925 | 12 | 3  | 12 | 2 NOT NAMED | 37.6 | 73.5 | 40  | 0   |
| 1925 | 12 | 3  | 18 | 2 NOT NAMED | 37.9 | 72.5 | 35  | 0   |
| 1925 | 12 | 4  | 0  | 2 NOT NAMED | 37.9 | 71.7 | 35  | 0   |
| 1925 | 12 | 4  | 6  | 2 NOT NAMED | 37.8 | 70.8 | 30  | 0   |
| 1925 | 12 | 4  | 12 | 2 NOT NAMED | 37.6 | 70.0 | 30  | 0   |
| 1925 | 12 | 4  | 18 | 2 NOT NAMED | 37.1 | 68.9 | 25  | 0   |
| 1926 | 7  | 22 | 6  | 1 NOT NAMED | 14.0 | 57.9 | 35  | 0   |
| 1926 | 7  | 22 | 12 | 1 NOT NAMED | 14.2 | 58.8 | 40  | 0   |
| 1926 | 7  | 22 | 18 | 1 NOT NAMED | 14.6 | 60.3 | 40  | 0   |
| 1926 | 7  | 23 | 0  | 1 NOT NAMED | 15.1 | 61.8 | 45  | 0   |
| 1926 | 7  | 23 | 6  | 1 NOT NAMED | 15.6 | 63.2 | 55  | 0   |
| 1926 | 7  | 23 | 12 | 1 NOT NAMED | 16.3 | 64.5 | 60  | 0   |
| 1926 | 7  | 23 | 18 | 1 NOT NAMED | 17.1 | 65.8 | 65  | 0   |
| 1926 | 7  | 24 | 0  | 1 NOT NAMED | 17.9 | 67.1 | 70  | 0   |
| 1926 | 7  | 24 | 6  | 1 NOT NAMED | 18.7 | 68.2 | 80  | 0   |
| 1926 | 7  | 24 | 12 | 1 NOT NAMED | 19.5 | 69.3 | 85  | 0   |
| 1926 | 7  | 24 | 18 | 1 NOT NAMED | 20.2 | 70.3 | 90  | 0   |
| 1926 | 7  | 25 | 0  | 1 NOT NAMED | 20.9 | 71.3 | 95  | 0   |
| 1926 | 7  | 25 | 6  | 1 NOT NAMED | 21.5 | 72.2 | 100 | 0   |
| 1926 | 7  | 25 | 12 | 1 NOT NAMED | 22.2 | 73.2 | 110 | 0   |
| 1926 | 7  | 25 | 18 | 1 NOT NAMED | 22.9 | 74.2 | 115 | 0   |
| 1926 | 7  | 26 | 0  | 1 NOT NAMED | 23.5 | 75.1 | 120 | 0   |
| 1926 | 7  | 26 | 6  | 1 NOT NAMED | 24.2 | 76.1 | 120 | 0   |
| 1926 | 7  | 26 | 12 | 1 NOT NAMED | 24.8 | 77.0 | 115 | 0   |
| 1926 | 7  | 26 | 18 | 1 NOT NAMED | 25.3 | 77.8 | 110 | 0   |
| 1926 | 7  | 27 | 0  | 1 NOT NAMED | 25.7 | 78.4 | 105 | 0   |
| 1926 | 7  | 27 | 6  | 1 NOT NAMED | 26.0 | 78.9 | 95  | 0   |
| 1926 | 7  | 27 | 12 | 1 NOT NAMED | 26.5 | 79.4 | 90  | 0   |
| 1926 | 7  | 27 | 18 | 1 NOT NAMED | 27.1 | 79.9 | 85  | 0   |
| 1926 | 7  | 28 | 0  | 1 NOT NAMED | 27.7 | 80.2 | 80  | 0   |
| 1926 | 7  | 28 | 6  | 1 NOT NAMED | 28.3 | 80.6 | 75  | 0   |
| 1926 | 7  | 28 | 12 | 1 NOT NAMED | 28.9 | 81.1 | 60  | 975 |
| 1926 | 7  | 28 | 18 | 1 NOT NAMED | 29.6 | 81.7 | 60  | 0   |
| 1926 | 7  | 29 | 0  | 1 NOT NAMED | 30.3 | 82.5 | 50  | 0   |
| 1926 | 7  | 29 | 6  | 1 NOT NAMED | 31.0 | 83.4 | 40  | 0   |
| 1926 | 7  | 29 | 12 | 1 NOT NAMED | 31.6 | 84.3 | 35  | 0   |
| 1926 | 7  | 29 | 18 | 1 NOT NAMED | 32.0 | 85.4 | 30  | 0   |

|      |   |    |    |   |           |      |      |     |   |
|------|---|----|----|---|-----------|------|------|-----|---|
| 1926 | 7 | 30 | 0  | 1 | NOT NAMED | 32.3 | 86.6 | 25  | 0 |
| 1926 | 7 | 30 | 6  | 1 | NOT NAMED | 32.5 | 87.9 | 20  | 0 |
| 1926 | 7 | 30 | 12 | 1 | NOT NAMED | 32.8 | 89.1 | 20  | 0 |
| 1926 | 7 | 30 | 18 | 1 | NOT NAMED | 33.2 | 90.2 | 20  | 0 |
| 1926 | 7 | 31 | 0  | 1 | NOT NAMED | 33.5 | 91.0 | 20  | 0 |
| 1926 | 7 | 31 | 6  | 1 | NOT NAMED | 34.1 | 91.4 | 20  | 0 |
| 1926 | 7 | 31 | 12 | 1 | NOT NAMED | 35.0 | 91.0 | 20  | 0 |
| 1926 | 7 | 31 | 18 | 1 | NOT NAMED | 36.1 | 90.0 | 25  | 0 |
| 1926 | 8 | 1  | 0  | 1 | NOT NAMED | 37.3 | 88.7 | 25  | 0 |
| 1926 | 8 | 1  | 6  | 1 | NOT NAMED | 38.4 | 87.1 | 25  | 0 |
| 1926 | 8 | 1  | 12 | 1 | NOT NAMED | 39.5 | 85.5 | 25  | 0 |
| 1926 | 8 | 1  | 18 | 1 | NOT NAMED | 40.6 | 83.9 | 25  | 0 |
| 1926 | 8 | 2  | 0  | 1 | NOT NAMED | 41.8 | 82.2 | 25  | 0 |
| 1926 | 8 | 2  | 6  | 1 | NOT NAMED | 42.9 | 80.6 | 25  | 0 |
| 1926 | 8 | 2  | 12 | 1 | NOT NAMED | 44.0 | 78.8 | 25  | 0 |
| 1926 | 7 | 31 | 18 | 2 | NOT NAMED | 19.0 | 54.0 | 40  | 0 |
| 1926 | 8 | 1  | 0  | 2 | NOT NAMED | 20.5 | 55.9 | 45  | 0 |
| 1926 | 8 | 1  | 6  | 2 | NOT NAMED | 21.0 | 56.4 | 45  | 0 |
| 1926 | 8 | 1  | 12 | 2 | NOT NAMED | 21.6 | 57.0 | 45  | 0 |
| 1926 | 8 | 1  | 18 | 2 | NOT NAMED | 22.0 | 57.4 | 50  | 0 |
| 1926 | 8 | 2  | 0  | 2 | NOT NAMED | 22.5 | 57.9 | 55  | 0 |
| 1926 | 8 | 2  | 6  | 2 | NOT NAMED | 22.9 | 58.3 | 55  | 0 |
| 1926 | 8 | 2  | 12 | 2 | NOT NAMED | 23.3 | 58.7 | 60  | 0 |
| 1926 | 8 | 2  | 18 | 2 | NOT NAMED | 23.7 | 59.1 | 65  | 0 |
| 1926 | 8 | 3  | 0  | 2 | NOT NAMED | 24.0 | 59.4 | 70  | 0 |
| 1926 | 8 | 3  | 6  | 2 | NOT NAMED | 24.4 | 59.8 | 75  | 0 |
| 1926 | 8 | 3  | 12 | 2 | NOT NAMED | 24.8 | 60.2 | 80  | 0 |
| 1926 | 8 | 3  | 18 | 2 | NOT NAMED | 25.3 | 60.7 | 85  | 0 |
| 1926 | 8 | 4  | 0  | 2 | NOT NAMED | 25.8 | 61.2 | 90  | 0 |
| 1926 | 8 | 4  | 6  | 2 | NOT NAMED | 26.4 | 61.7 | 95  | 0 |
| 1926 | 8 | 4  | 12 | 2 | NOT NAMED | 27.0 | 62.2 | 100 | 0 |
| 1926 | 8 | 4  | 18 | 2 | NOT NAMED | 27.6 | 62.7 | 100 | 0 |
| 1926 | 8 | 5  | 0  | 2 | NOT NAMED | 28.2 | 63.2 | 100 | 0 |
| 1926 | 8 | 5  | 6  | 2 | NOT NAMED | 28.8 | 63.8 | 105 | 0 |
| 1926 | 8 | 5  | 12 | 2 | NOT NAMED | 29.4 | 64.3 | 105 | 0 |
| 1926 | 8 | 5  | 18 | 2 | NOT NAMED | 29.9 | 64.8 | 105 | 0 |
| 1926 | 8 | 6  | 0  | 2 | NOT NAMED | 30.4 | 65.2 | 105 | 0 |
| 1926 | 8 | 6  | 6  | 2 | NOT NAMED | 30.8 | 65.5 | 105 | 0 |
| 1926 | 8 | 6  | 12 | 2 | NOT NAMED | 31.4 | 65.9 | 100 | 0 |
| 1926 | 8 | 6  | 18 | 2 | NOT NAMED | 32.4 | 66.3 | 100 | 0 |
| 1926 | 8 | 7  | 0  | 2 | NOT NAMED | 33.9 | 66.8 | 95  | 0 |
| 1926 | 8 | 7  | 6  | 2 | NOT NAMED | 35.8 | 66.5 | 90  | 0 |
| 1926 | 8 | 7  | 12 | 2 | NOT NAMED | 37.7 | 66.2 | 85  | 0 |
| 1926 | 8 | 7  | 18 | 2 | NOT NAMED | 39.6 | 65.6 | 80  | 0 |

|      |   |    |    |   |           |      |      |    |   |
|------|---|----|----|---|-----------|------|------|----|---|
| 1926 | 8 | 8  | 0  | 2 | NOT NAMED | 41.6 | 64.5 | 75 | 0 |
| 1926 | 8 | 8  | 6  | 2 | NOT NAMED | 43.6 | 62.9 | 70 | 0 |
| 1926 | 8 | 8  | 12 | 2 | NOT NAMED | 45.8 | 61.0 | 65 | 0 |
| 1926 | 8 | 8  | 18 | 2 | NOT NAMED | 48.0 | 59.0 | 55 | 0 |
| 1926 | 8 | 22 | 0  | 3 | NOT NAMED | 19.8 | 82.3 | 60 | 0 |
| 1926 | 8 | 22 | 6  | 3 | NOT NAMED | 20.9 | 84.0 | 60 | 0 |
| 1926 | 8 | 22 | 12 | 3 | NOT NAMED | 21.5 | 85.0 | 60 | 0 |
| 1926 | 8 | 22 | 18 | 3 | NOT NAMED | 22.2 | 86.3 | 60 | 0 |
| 1926 | 8 | 23 | 0  | 3 | NOT NAMED | 22.9 | 87.4 | 65 | 0 |
| 1926 | 8 | 23 | 6  | 3 | NOT NAMED | 23.5 | 88.3 | 70 | 0 |
| 1926 | 8 | 23 | 12 | 3 | NOT NAMED | 24.1 | 89.1 | 70 | 0 |
| 1926 | 8 | 23 | 18 | 3 | NOT NAMED | 24.6 | 89.7 | 75 | 0 |
| 1926 | 8 | 24 | 0  | 3 | NOT NAMED | 25.1 | 90.2 | 80 | 0 |
| 1926 | 8 | 24 | 6  | 3 | NOT NAMED | 25.5 | 90.6 | 85 | 0 |
| 1926 | 8 | 24 | 12 | 3 | NOT NAMED | 26.0 | 90.8 | 85 | 0 |
| 1926 | 8 | 24 | 18 | 3 | NOT NAMED | 26.4 | 90.9 | 85 | 0 |
| 1926 | 8 | 25 | 0  | 3 | NOT NAMED | 26.8 | 90.9 | 90 | 0 |
| 1926 | 8 | 25 | 6  | 3 | NOT NAMED | 27.3 | 91.0 | 90 | 0 |
| 1926 | 8 | 25 | 12 | 3 | NOT NAMED | 27.7 | 91.1 | 90 | 0 |
| 1926 | 8 | 25 | 18 | 3 | NOT NAMED | 28.3 | 91.1 | 90 | 0 |
| 1926 | 8 | 26 | 0  | 3 | NOT NAMED | 28.9 | 91.2 | 85 | 0 |
| 1926 | 8 | 26 | 6  | 3 | NOT NAMED | 29.6 | 91.3 | 80 | 0 |
| 1926 | 8 | 26 | 12 | 3 | NOT NAMED | 30.2 | 91.4 | 65 | 0 |
| 1926 | 8 | 26 | 18 | 3 | NOT NAMED | 30.7 | 91.7 | 55 | 0 |
| 1926 | 8 | 27 | 0  | 3 | NOT NAMED | 31.2 | 92.4 | 45 | 0 |
| 1926 | 8 | 27 | 6  | 3 | NOT NAMED | 31.6 | 93.4 | 35 | 0 |
| 1926 | 8 | 27 | 12 | 3 | NOT NAMED | 32.0 | 94.8 | 25 | 0 |
| 1926 | 8 | 27 | 18 | 3 | NOT NAMED | 32.0 | 95.8 | 20 | 0 |
| 1926 | 9 | 2  | 0  | 4 | NOT NAMED | 13.8 | 42.9 | 35 | 0 |
| 1926 | 9 | 2  | 6  | 4 | NOT NAMED | 14.3 | 44.3 | 35 | 0 |
| 1926 | 9 | 2  | 12 | 4 | NOT NAMED | 14.5 | 44.9 | 35 | 0 |
| 1926 | 9 | 2  | 18 | 4 | NOT NAMED | 14.6 | 45.3 | 40 | 0 |
| 1926 | 9 | 3  | 0  | 4 | NOT NAMED | 14.8 | 45.8 | 40 | 0 |
| 1926 | 9 | 3  | 6  | 4 | NOT NAMED | 14.9 | 46.2 | 45 | 0 |
| 1926 | 9 | 3  | 12 | 4 | NOT NAMED | 15.0 | 46.7 | 45 | 0 |
| 1926 | 9 | 3  | 18 | 4 | NOT NAMED | 15.1 | 47.1 | 50 | 0 |
| 1926 | 9 | 4  | 0  | 4 | NOT NAMED | 15.2 | 47.6 | 50 | 0 |
| 1926 | 9 | 4  | 6  | 4 | NOT NAMED | 15.3 | 48.0 | 55 | 0 |
| 1926 | 9 | 4  | 12 | 4 | NOT NAMED | 15.5 | 48.6 | 55 | 0 |
| 1926 | 9 | 4  | 18 | 4 | NOT NAMED | 15.7 | 49.3 | 60 | 0 |
| 1926 | 9 | 5  | 0  | 4 | NOT NAMED | 15.9 | 50.0 | 65 | 0 |
| 1926 | 9 | 5  | 6  | 4 | NOT NAMED | 16.1 | 50.7 | 70 | 0 |
| 1926 | 9 | 5  | 12 | 4 | NOT NAMED | 16.4 | 51.5 | 70 | 0 |
| 1926 | 9 | 5  | 18 | 4 | NOT NAMED | 16.7 | 52.2 | 75 | 0 |

|      |   |    |    |             |      |      |     |   |
|------|---|----|----|-------------|------|------|-----|---|
| 1926 | 9 | 6  | 0  | 4 NOT NAMED | 17.2 | 53.0 | 80  | 0 |
| 1926 | 9 | 6  | 6  | 4 NOT NAMED | 17.6 | 53.7 | 80  | 0 |
| 1926 | 9 | 6  | 12 | 4 NOT NAMED | 18.2 | 54.5 | 85  | 0 |
| 1926 | 9 | 6  | 18 | 4 NOT NAMED | 18.8 | 55.3 | 85  | 0 |
| 1926 | 9 | 7  | 0  | 4 NOT NAMED | 19.5 | 56.2 | 85  | 0 |
| 1926 | 9 | 7  | 6  | 4 NOT NAMED | 20.2 | 57.1 | 90  | 0 |
| 1926 | 9 | 7  | 12 | 4 NOT NAMED | 20.8 | 58.0 | 90  | 0 |
| 1926 | 9 | 7  | 18 | 4 NOT NAMED | 21.4 | 58.8 | 90  | 0 |
| 1926 | 9 | 8  | 0  | 4 NOT NAMED | 21.9 | 59.5 | 95  | 0 |
| 1926 | 9 | 8  | 6  | 4 NOT NAMED | 22.4 | 60.2 | 95  | 0 |
| 1926 | 9 | 8  | 12 | 4 NOT NAMED | 22.9 | 60.8 | 95  | 0 |
| 1926 | 9 | 8  | 18 | 4 NOT NAMED | 23.3 | 61.4 | 100 | 0 |
| 1926 | 9 | 9  | 0  | 4 NOT NAMED | 23.7 | 61.9 | 100 | 0 |
| 1926 | 9 | 9  | 6  | 4 NOT NAMED | 24.1 | 62.4 | 100 | 0 |
| 1926 | 9 | 9  | 12 | 4 NOT NAMED | 24.4 | 62.8 | 100 | 0 |
| 1926 | 9 | 9  | 18 | 4 NOT NAMED | 24.7 | 63.2 | 105 | 0 |
| 1926 | 9 | 10 | 0  | 4 NOT NAMED | 25.0 | 63.5 | 105 | 0 |
| 1926 | 9 | 10 | 6  | 4 NOT NAMED | 25.3 | 63.8 | 105 | 0 |
| 1926 | 9 | 10 | 12 | 4 NOT NAMED | 25.6 | 64.2 | 105 | 0 |
| 1926 | 9 | 10 | 18 | 4 NOT NAMED | 26.0 | 64.6 | 105 | 0 |
| 1926 | 9 | 11 | 0  | 4 NOT NAMED | 26.4 | 65.0 | 110 | 0 |
| 1926 | 9 | 11 | 6  | 4 NOT NAMED | 26.7 | 65.4 | 110 | 0 |
| 1926 | 9 | 11 | 12 | 4 NOT NAMED | 27.1 | 65.8 | 110 | 0 |
| 1926 | 9 | 11 | 18 | 4 NOT NAMED | 27.5 | 66.2 | 110 | 0 |
| 1926 | 9 | 12 | 0  | 4 NOT NAMED | 27.8 | 66.5 | 110 | 0 |
| 1926 | 9 | 12 | 6  | 4 NOT NAMED | 28.2 | 66.9 | 110 | 0 |
| 1926 | 9 | 12 | 12 | 4 NOT NAMED | 28.6 | 67.2 | 115 | 0 |
| 1926 | 9 | 12 | 18 | 4 NOT NAMED | 29.0 | 67.5 | 115 | 0 |
| 1926 | 9 | 13 | 0  | 4 NOT NAMED | 29.4 | 67.9 | 115 | 0 |
| 1926 | 9 | 13 | 6  | 4 NOT NAMED | 29.8 | 68.2 | 115 | 0 |
| 1926 | 9 | 13 | 12 | 4 NOT NAMED | 30.2 | 68.5 | 115 | 0 |
| 1926 | 9 | 13 | 18 | 4 NOT NAMED | 30.6 | 68.9 | 115 | 0 |
| 1926 | 9 | 14 | 0  | 4 NOT NAMED | 31.1 | 69.3 | 115 | 0 |
| 1926 | 9 | 14 | 6  | 4 NOT NAMED | 31.5 | 69.6 | 115 | 0 |
| 1926 | 9 | 14 | 12 | 4 NOT NAMED | 32.0 | 70.0 | 120 | 0 |
| 1926 | 9 | 14 | 18 | 4 NOT NAMED | 32.4 | 70.3 | 120 | 0 |
| 1926 | 9 | 15 | 0  | 4 NOT NAMED | 32.9 | 70.6 | 120 | 0 |
| 1926 | 9 | 15 | 6  | 4 NOT NAMED | 33.4 | 70.8 | 120 | 0 |
| 1926 | 9 | 15 | 12 | 4 NOT NAMED | 34.0 | 71.0 | 115 | 0 |
| 1926 | 9 | 15 | 18 | 4 NOT NAMED | 34.4 | 71.1 | 115 | 0 |
| 1926 | 9 | 16 | 0  | 4 NOT NAMED | 34.9 | 71.1 | 115 | 0 |
| 1926 | 9 | 16 | 6  | 4 NOT NAMED | 35.3 | 71.1 | 115 | 0 |
| 1926 | 9 | 16 | 12 | 4 NOT NAMED | 35.8 | 70.9 | 110 | 0 |
| 1926 | 9 | 16 | 18 | 4 NOT NAMED | 37.5 | 69.6 | 110 | 0 |

|      |      |    |             |      |      |     |   |
|------|------|----|-------------|------|------|-----|---|
| 1926 | 9 17 | 0  | 4 NOT NAMED | 38.4 | 68.0 | 105 | 0 |
| 1926 | 9 17 | 6  | 4 NOT NAMED | 39.0 | 66.5 | 105 | 0 |
| 1926 | 9 17 | 12 | 4 NOT NAMED | 39.6 | 65.0 | 100 | 0 |
| 1926 | 9 17 | 18 | 4 NOT NAMED | 39.9 | 63.0 | 100 | 0 |
| 1926 | 9 18 | 0  | 4 NOT NAMED | 39.7 | 61.0 | 95  | 0 |
| 1926 | 9 18 | 6  | 4 NOT NAMED | 38.7 | 60.3 | 95  | 0 |
| 1926 | 9 18 | 12 | 4 NOT NAMED | 38.0 | 60.3 | 90  | 0 |
| 1926 | 9 18 | 18 | 4 NOT NAMED | 37.7 | 60.5 | 90  | 0 |
| 1926 | 9 19 | 0  | 4 NOT NAMED | 37.6 | 60.8 | 85  | 0 |
| 1926 | 9 19 | 6  | 4 NOT NAMED | 37.5 | 61.1 | 85  | 0 |
| 1926 | 9 19 | 12 | 4 NOT NAMED | 37.5 | 61.5 | 80  | 0 |
| 1926 | 9 19 | 18 | 4 NOT NAMED | 37.6 | 61.7 | 80  | 0 |
| 1926 | 9 20 | 0  | 4 NOT NAMED | 37.7 | 61.9 | 80  | 0 |
| 1926 | 9 20 | 6  | 4 NOT NAMED | 37.8 | 62.1 | 75  | 0 |
| 1926 | 9 20 | 12 | 4 NOT NAMED | 38.0 | 62.4 | 75  | 0 |
| 1926 | 9 20 | 18 | 4 NOT NAMED | 38.5 | 62.3 | 75  | 0 |
| 1926 | 9 21 | 0  | 4 NOT NAMED | 39.1 | 61.6 | 70  | 0 |
| 1926 | 9 21 | 6  | 4 NOT NAMED | 39.5 | 60.8 | 70  | 0 |
| 1926 | 9 21 | 12 | 4 NOT NAMED | 40.0 | 60.0 | 70  | 0 |
| 1926 | 9 21 | 18 | 4 NOT NAMED | 40.7 | 58.9 | 65  | 0 |
| 1926 | 9 22 | 0  | 4 NOT NAMED | 41.5 | 57.5 | 65  | 0 |
| 1926 | 9 22 | 6  | 4 NOT NAMED | 42.4 | 56.2 | 60  | 0 |
| 1926 | 9 22 | 12 | 4 NOT NAMED | 43.4 | 55.2 | 60  | 0 |
| 1926 | 9 22 | 18 | 4 NOT NAMED | 44.5 | 54.5 | 55  | 0 |
| 1926 | 9 23 | 0  | 4 NOT NAMED | 45.7 | 54.1 | 55  | 0 |
| 1926 | 9 23 | 6  | 4 NOT NAMED | 47.2 | 53.8 | 50  | 0 |
| 1926 | 9 23 | 12 | 4 NOT NAMED | 48.8 | 53.2 | 50  | 0 |
| 1926 | 9 23 | 18 | 4 NOT NAMED | 50.7 | 52.4 | 50  | 0 |
| 1926 | 9 24 | 0  | 4 NOT NAMED | 52.9 | 51.4 | 50  | 0 |
| 1926 | 9 24 | 6  | 4 NOT NAMED | 55.4 | 50.4 | 45  | 0 |
| 1926 | 9 24 | 12 | 4 NOT NAMED | 58.2 | 49.2 | 45  | 0 |
| 1926 | 9 10 | 6  | 5 NOT NAMED | 24.7 | 53.5 | 60  | 0 |
| 1926 | 9 10 | 12 | 5 NOT NAMED | 25.3 | 54.0 | 65  | 0 |
| 1926 | 9 10 | 18 | 5 NOT NAMED | 25.9 | 54.4 | 70  | 0 |
| 1926 | 9 11 | 0  | 5 NOT NAMED | 26.5 | 54.7 | 70  | 0 |
| 1926 | 9 11 | 6  | 5 NOT NAMED | 27.2 | 54.9 | 75  | 0 |
| 1926 | 9 11 | 12 | 5 NOT NAMED | 27.8 | 55.1 | 75  | 0 |
| 1926 | 9 11 | 18 | 5 NOT NAMED | 28.4 | 55.3 | 80  | 0 |
| 1926 | 9 12 | 0  | 5 NOT NAMED | 29.0 | 55.4 | 85  | 0 |
| 1926 | 9 12 | 6  | 5 NOT NAMED | 29.7 | 55.4 | 90  | 0 |
| 1926 | 9 12 | 12 | 5 NOT NAMED | 30.3 | 55.3 | 90  | 0 |
| 1926 | 9 12 | 18 | 5 NOT NAMED | 31.0 | 55.1 | 90  | 0 |
| 1926 | 9 13 | 0  | 5 NOT NAMED | 31.8 | 54.8 | 90  | 0 |
| 1926 | 9 13 | 6  | 5 NOT NAMED | 32.5 | 54.4 | 80  | 0 |

|      |         |             |      |      |     |     |
|------|---------|-------------|------|------|-----|-----|
| 1926 | 9 13 12 | 5 NOT NAMED | 33.0 | 54.1 | 80  | 0   |
| 1926 | 9 13 18 | 5 NOT NAMED | 33.5 | 53.6 | 75  | 0   |
| 1926 | 9 14 0  | 5 NOT NAMED | 33.2 | 53.0 | 70  | 0   |
| 1926 | 9 14 6  | 5 NOT NAMED | 32.6 | 52.8 | 60  | 0   |
| 1926 | 9 14 12 | 5 NOT NAMED | 32.1 | 52.7 | 60  | 0   |
| 1926 | 9 14 18 | 5 NOT NAMED | 31.7 | 52.5 | 60  | 0   |
| 1926 | 9 15 0  | 5 NOT NAMED | 31.4 | 52.2 | 50  | 0   |
| 1926 | 9 15 6  | 5 NOT NAMED | 31.1 | 52.0 | 40  | 0   |
| 1926 | 9 15 12 | 5 NOT NAMED | 30.8 | 51.6 | 35  | 0   |
| 1926 | 9 15 18 | 5 NOT NAMED | 30.6 | 49.6 | 30  | 0   |
| 1926 | 9 11 12 | 6 NOT NAMED | 15.4 | 46.0 | 55  | 0   |
| 1926 | 9 11 18 | 6 NOT NAMED | 15.7 | 47.1 | 60  | 0   |
| 1926 | 9 12 0  | 6 NOT NAMED | 16.1 | 48.2 | 60  | 0   |
| 1926 | 9 12 6  | 6 NOT NAMED | 16.4 | 49.4 | 60  | 0   |
| 1926 | 9 12 12 | 6 NOT NAMED | 16.7 | 50.6 | 65  | 0   |
| 1926 | 9 12 18 | 6 NOT NAMED | 17.0 | 51.9 | 70  | 0   |
| 1926 | 9 13 0  | 6 NOT NAMED | 17.3 | 53.3 | 70  | 0   |
| 1926 | 9 13 6  | 6 NOT NAMED | 17.5 | 54.7 | 75  | 0   |
| 1926 | 9 13 12 | 6 NOT NAMED | 17.8 | 56.0 | 75  | 0   |
| 1926 | 9 13 18 | 6 NOT NAMED | 18.1 | 57.3 | 80  | 0   |
| 1926 | 9 14 0  | 6 NOT NAMED | 18.4 | 58.6 | 85  | 0   |
| 1926 | 9 14 6  | 6 NOT NAMED | 18.8 | 59.9 | 85  | 0   |
| 1926 | 9 14 12 | 6 NOT NAMED | 19.1 | 61.1 | 90  | 0   |
| 1926 | 9 14 18 | 6 NOT NAMED | 19.4 | 62.2 | 90  | 0   |
| 1926 | 9 15 0  | 6 NOT NAMED | 19.6 | 63.1 | 95  | 0   |
| 1926 | 9 15 6  | 6 NOT NAMED | 19.8 | 64.0 | 100 | 0   |
| 1926 | 9 15 12 | 6 NOT NAMED | 20.0 | 65.0 | 100 | 0   |
| 1926 | 9 15 18 | 6 NOT NAMED | 20.2 | 66.1 | 105 | 0   |
| 1926 | 9 16 0  | 6 NOT NAMED | 20.5 | 67.2 | 110 | 0   |
| 1926 | 9 16 6  | 6 NOT NAMED | 20.9 | 68.4 | 120 | 0   |
| 1926 | 9 16 12 | 6 NOT NAMED | 21.3 | 69.7 | 125 | 0   |
| 1926 | 9 16 18 | 6 NOT NAMED | 21.8 | 71.2 | 130 | 0   |
| 1926 | 9 17 0  | 6 NOT NAMED | 22.4 | 72.8 | 130 | 0   |
| 1926 | 9 17 6  | 6 NOT NAMED | 23.0 | 74.4 | 130 | 0   |
| 1926 | 9 17 12 | 6 NOT NAMED | 23.6 | 75.8 | 125 | 0   |
| 1926 | 9 17 18 | 6 NOT NAMED | 24.1 | 77.0 | 125 | 0   |
| 1926 | 9 18 0  | 6 NOT NAMED | 24.6 | 78.1 | 120 | 0   |
| 1926 | 9 18 6  | 6 NOT NAMED | 25.2 | 79.3 | 120 | 0   |
| 1926 | 9 18 12 | 6 NOT NAMED | 25.6 | 80.3 | 115 | 935 |
| 1926 | 9 18 18 | 6 NOT NAMED | 26.2 | 81.5 | 110 | 950 |
| 1926 | 9 19 0  | 6 NOT NAMED | 26.8 | 82.7 | 105 | 0   |
| 1926 | 9 19 6  | 6 NOT NAMED | 27.4 | 83.9 | 105 | 0   |
| 1926 | 9 19 12 | 6 NOT NAMED | 28.0 | 85.0 | 105 | 0   |
| 1926 | 9 19 18 | 6 NOT NAMED | 28.6 | 85.8 | 105 | 0   |

|      |      |    |             |      |      |     |     |
|------|------|----|-------------|------|------|-----|-----|
| 1926 | 9 20 | 0  | 6 NOT NAMED | 29.1 | 86.1 | 110 | 0   |
| 1926 | 9 20 | 6  | 6 NOT NAMED | 29.5 | 86.3 | 110 | 0   |
| 1926 | 9 20 | 12 | 6 NOT NAMED | 29.8 | 86.7 | 110 | 0   |
| 1926 | 9 20 | 18 | 6 NOT NAMED | 30.0 | 87.2 | 105 | 0   |
| 1926 | 9 21 | 0  | 6 NOT NAMED | 30.2 | 87.8 | 95  | 955 |
| 1926 | 9 21 | 6  | 6 NOT NAMED | 30.3 | 88.4 | 60  | 0   |
| 1926 | 9 21 | 12 | 6 NOT NAMED | 30.4 | 89.1 | 60  | 983 |
| 1926 | 9 21 | 18 | 6 NOT NAMED | 30.6 | 89.9 | 50  | 0   |
| 1926 | 9 22 | 0  | 6 NOT NAMED | 30.7 | 90.8 | 35  | 0   |
| 1926 | 9 22 | 6  | 6 NOT NAMED | 30.8 | 91.8 | 25  | 0   |
| 1926 | 9 22 | 12 | 6 NOT NAMED | 31.0 | 92.9 | 20  | 0   |
| 1926 | 9 11 | 0  | 7 NOT NAMED | 15.5 | 79.1 | 35  | 0   |
| 1926 | 9 11 | 6  | 7 NOT NAMED | 16.0 | 81.1 | 35  | 0   |
| 1926 | 9 11 | 12 | 7 NOT NAMED | 16.2 | 81.8 | 35  | 0   |
| 1926 | 9 11 | 18 | 7 NOT NAMED | 16.9 | 82.7 | 35  | 0   |
| 1926 | 9 12 | 0  | 7 NOT NAMED | 17.3 | 83.2 | 35  | 0   |
| 1926 | 9 12 | 6  | 7 NOT NAMED | 17.8 | 83.5 | 35  | 0   |
| 1926 | 9 12 | 12 | 7 NOT NAMED | 18.7 | 83.5 | 35  | 0   |
| 1926 | 9 12 | 18 | 7 NOT NAMED | 19.2 | 83.3 | 40  | 0   |
| 1926 | 9 13 | 0  | 7 NOT NAMED | 19.6 | 83.0 | 40  | 0   |
| 1926 | 9 13 | 6  | 7 NOT NAMED | 20.0 | 82.7 | 40  | 0   |
| 1926 | 9 13 | 12 | 7 NOT NAMED | 20.5 | 82.2 | 40  | 0   |
| 1926 | 9 13 | 18 | 7 NOT NAMED | 21.0 | 81.7 | 40  | 0   |
| 1926 | 9 14 | 0  | 7 NOT NAMED | 21.5 | 81.1 | 40  | 0   |
| 1926 | 9 14 | 6  | 7 NOT NAMED | 22.0 | 80.6 | 35  | 0   |
| 1926 | 9 14 | 12 | 7 NOT NAMED | 22.5 | 80.0 | 35  | 0   |
| 1926 | 9 14 | 18 | 7 NOT NAMED | 23.3 | 79.2 | 35  | 0   |
| 1926 | 9 15 | 0  | 7 NOT NAMED | 24.3 | 78.1 | 35  | 0   |
| 1926 | 9 15 | 6  | 7 NOT NAMED | 25.3 | 77.3 | 35  | 0   |
| 1926 | 9 15 | 12 | 7 NOT NAMED | 25.8 | 76.9 | 35  | 0   |
| 1926 | 9 15 | 18 | 7 NOT NAMED | 26.5 | 77.1 | 35  | 0   |
| 1926 | 9 16 | 0  | 7 NOT NAMED | 26.4 | 78.3 | 35  | 0   |
| 1926 | 9 16 | 6  | 7 NOT NAMED | 25.9 | 79.0 | 35  | 0   |
| 1926 | 9 16 | 12 | 7 NOT NAMED | 25.2 | 79.9 | 35  | 0   |
| 1926 | 9 16 | 18 | 7 NOT NAMED | 24.8 | 80.5 | 30  | 0   |
| 1926 | 9 17 | 0  | 7 NOT NAMED | 24.4 | 81.1 | 30  | 0   |
| 1926 | 9 17 | 6  | 7 NOT NAMED | 24.1 | 81.6 | 25  | 0   |
| 1926 | 9 17 | 12 | 7 NOT NAMED | 23.7 | 82.1 | 25  | 0   |
| 1926 | 9 21 | 12 | 8 NOT NAMED | 28.0 | 51.6 | 45  | 0   |
| 1926 | 9 21 | 18 | 8 NOT NAMED | 28.5 | 49.8 | 50  | 0   |
| 1926 | 9 22 | 0  | 8 NOT NAMED | 28.9 | 48.2 | 55  | 0   |
| 1926 | 9 22 | 6  | 8 NOT NAMED | 29.3 | 46.8 | 60  | 0   |
| 1926 | 9 22 | 12 | 8 NOT NAMED | 29.7 | 45.7 | 65  | 0   |
| 1926 | 9 22 | 18 | 8 NOT NAMED | 29.9 | 44.9 | 70  | 0   |



|      |      |    |             |      |      |     |   |
|------|------|----|-------------|------|------|-----|---|
| 1926 | 9 23 | 0  | 8 NOT NAMED | 30.1 | 44.2 | 75  | 0 |
| 1926 | 9 23 | 6  | 8 NOT NAMED | 30.3 | 43.5 | 75  | 0 |
| 1926 | 9 23 | 12 | 8 NOT NAMED | 30.6 | 42.7 | 80  | 0 |
| 1926 | 9 23 | 18 | 8 NOT NAMED | 31.1 | 41.9 | 80  | 0 |
| 1926 | 9 24 | 0  | 8 NOT NAMED | 31.6 | 41.1 | 85  | 0 |
| 1926 | 9 24 | 6  | 8 NOT NAMED | 32.1 | 40.2 | 85  | 0 |
| 1926 | 9 24 | 12 | 8 NOT NAMED | 32.6 | 39.2 | 90  | 0 |
| 1926 | 9 24 | 18 | 8 NOT NAMED | 33.0 | 38.0 | 90  | 0 |
| 1926 | 9 25 | 0  | 8 NOT NAMED | 33.5 | 36.5 | 95  | 0 |
| 1926 | 9 25 | 6  | 8 NOT NAMED | 33.9 | 35.0 | 100 | 0 |
| 1926 | 9 25 | 12 | 8 NOT NAMED | 34.3 | 33.5 | 105 | 0 |
| 1926 | 9 25 | 18 | 8 NOT NAMED | 34.7 | 31.9 | 105 | 0 |
| 1926 | 9 26 | 0  | 8 NOT NAMED | 35.2 | 30.3 | 105 | 0 |
| 1926 | 9 26 | 6  | 8 NOT NAMED | 35.7 | 28.6 | 100 | 0 |
| 1926 | 9 26 | 12 | 8 NOT NAMED | 36.2 | 27.1 | 95  | 0 |
| 1926 | 9 26 | 18 | 8 NOT NAMED | 37.2 | 25.7 | 90  | 0 |
| 1926 | 9 27 | 0  | 8 NOT NAMED | 38.4 | 24.8 | 90  | 0 |
| 1926 | 9 27 | 6  | 8 NOT NAMED | 39.5 | 25.0 | 85  | 0 |
| 1926 | 9 27 | 12 | 8 NOT NAMED | 40.4 | 26.5 | 80  | 0 |
| 1926 | 9 27 | 18 | 8 NOT NAMED | 40.5 | 27.3 | 80  | 0 |
| 1926 | 9 28 | 0  | 8 NOT NAMED | 40.4 | 28.5 | 75  | 0 |
| 1926 | 9 28 | 6  | 8 NOT NAMED | 39.5 | 29.7 | 75  | 0 |
| 1926 | 9 28 | 12 | 8 NOT NAMED | 38.5 | 30.0 | 70  | 0 |
| 1926 | 9 28 | 18 | 8 NOT NAMED | 38.1 | 29.9 | 70  | 0 |
| 1926 | 9 29 | 0  | 8 NOT NAMED | 37.7 | 29.7 | 70  | 0 |
| 1926 | 9 29 | 6  | 8 NOT NAMED | 37.3 | 29.4 | 65  | 0 |
| 1926 | 9 29 | 12 | 8 NOT NAMED | 36.9 | 29.1 | 60  | 0 |
| 1926 | 9 29 | 18 | 8 NOT NAMED | 36.2 | 28.8 | 60  | 0 |
| 1926 | 9 30 | 0  | 8 NOT NAMED | 35.3 | 28.4 | 60  | 0 |
| 1926 | 9 30 | 6  | 8 NOT NAMED | 34.3 | 28.0 | 55  | 0 |
| 1926 | 9 30 | 12 | 8 NOT NAMED | 33.6 | 27.6 | 50  | 0 |
| 1926 | 9 30 | 18 | 8 NOT NAMED | 33.2 | 27.0 | 45  | 0 |
| 1926 | 10 1 | 0  | 8 NOT NAMED | 33.0 | 26.3 | 40  | 0 |
| 1926 | 10 1 | 6  | 8 NOT NAMED | 33.0 | 25.5 | 35  | 0 |
| 1926 | 10 1 | 12 | 8 NOT NAMED | 33.2 | 24.6 | 35  | 0 |
| 1926 | 10 1 | 18 | 8 NOT NAMED | 34.0 | 23.2 | 30  | 0 |
| 1926 | 10 3 | 6  | 9 NOT NAMED | 16.6 | 80.0 | 35  | 0 |
| 1926 | 10 3 | 12 | 9 NOT NAMED | 16.6 | 81.3 | 35  | 0 |
| 1926 | 10 3 | 18 | 9 NOT NAMED | 16.6 | 82.2 | 35  | 0 |
| 1926 | 10 4 | 0  | 9 NOT NAMED | 16.5 | 83.2 | 35  | 0 |
| 1926 | 10 4 | 6  | 9 NOT NAMED | 16.4 | 84.1 | 35  | 0 |
| 1926 | 10 4 | 12 | 9 NOT NAMED | 16.4 | 85.0 | 35  | 0 |
| 1926 | 10 4 | 18 | 9 NOT NAMED | 16.3 | 86.1 | 35  | 0 |
| 1926 | 10 5 | 0  | 9 NOT NAMED | 15.0 | 82.6 | 30  | 0 |

|            |       |           |      |      |     |   |
|------------|-------|-----------|------|------|-----|---|
| 1926 10 14 | 6 10  | NOT NAMED | 9.5  | 80.7 | 35  | 0 |
| 1926 10 14 | 12 10 | NOT NAMED | 10.7 | 80.8 | 35  | 0 |
| 1926 10 14 | 18 10 | NOT NAMED | 10.9 | 80.9 | 35  | 0 |
| 1926 10 15 | 0 10  | NOT NAMED | 11.1 | 80.9 | 35  | 0 |
| 1926 10 15 | 6 10  | NOT NAMED | 11.4 | 81.0 | 35  | 0 |
| 1926 10 15 | 12 10 | NOT NAMED | 11.6 | 81.1 | 35  | 0 |
| 1926 10 15 | 18 10 | NOT NAMED | 11.9 | 81.2 | 40  | 0 |
| 1926 10 16 | 0 10  | NOT NAMED | 12.1 | 81.3 | 40  | 0 |
| 1926 10 16 | 6 10  | NOT NAMED | 12.3 | 81.4 | 45  | 0 |
| 1926 10 16 | 12 10 | NOT NAMED | 12.6 | 81.4 | 45  | 0 |
| 1926 10 16 | 18 10 | NOT NAMED | 12.9 | 81.5 | 50  | 0 |
| 1926 10 17 | 0 10  | NOT NAMED | 13.2 | 81.6 | 50  | 0 |
| 1926 10 17 | 6 10  | NOT NAMED | 13.5 | 81.6 | 55  | 0 |
| 1926 10 17 | 12 10 | NOT NAMED | 13.9 | 81.7 | 55  | 0 |
| 1926 10 17 | 18 10 | NOT NAMED | 14.4 | 81.8 | 60  | 0 |
| 1926 10 18 | 0 10  | NOT NAMED | 15.0 | 82.0 | 65  | 0 |
| 1926 10 18 | 6 10  | NOT NAMED | 15.6 | 82.2 | 70  | 0 |
| 1926 10 18 | 12 10 | NOT NAMED | 16.3 | 82.4 | 75  | 0 |
| 1926 10 18 | 18 10 | NOT NAMED | 17.0 | 82.6 | 75  | 0 |
| 1926 10 19 | 0 10  | NOT NAMED | 17.7 | 82.7 | 80  | 0 |
| 1926 10 19 | 6 10  | NOT NAMED | 18.4 | 82.8 | 85  | 0 |
| 1926 10 19 | 12 10 | NOT NAMED | 19.1 | 82.9 | 85  | 0 |
| 1926 10 19 | 18 10 | NOT NAMED | 19.8 | 82.9 | 90  | 0 |
| 1926 10 20 | 0 10  | NOT NAMED | 20.5 | 82.9 | 95  | 0 |
| 1926 10 20 | 6 10  | NOT NAMED | 21.3 | 82.8 | 100 | 0 |
| 1926 10 20 | 12 10 | NOT NAMED | 22.2 | 82.4 | 105 | 0 |
| 1926 10 20 | 18 10 | NOT NAMED | 23.1 | 81.9 | 100 | 0 |
| 1926 10 21 | 0 10  | NOT NAMED | 24.3 | 80.7 | 95  | 0 |
| 1926 10 21 | 6 10  | NOT NAMED | 25.6 | 79.7 | 95  | 0 |
| 1926 10 21 | 12 10 | NOT NAMED | 26.9 | 78.0 | 100 | 0 |
| 1926 10 21 | 18 10 | NOT NAMED | 28.0 | 75.3 | 105 | 0 |
| 1926 10 22 | 0 10  | NOT NAMED | 29.1 | 72.5 | 110 | 0 |
| 1926 10 22 | 6 10  | NOT NAMED | 30.3 | 69.6 | 115 | 0 |
| 1926 10 22 | 12 10 | NOT NAMED | 31.4 | 66.7 | 115 | 0 |
| 1926 10 22 | 18 10 | NOT NAMED | 32.7 | 63.7 | 100 | 0 |
| 1926 10 23 | 0 10  | NOT NAMED | 34.2 | 60.7 | 90  | 0 |
| 1926 10 23 | 6 10  | NOT NAMED | 35.6 | 57.7 | 70  | 0 |
| 1926 10 23 | 12 10 | NOT NAMED | 37.0 | 54.8 | 65  | 0 |
| 1926 10 23 | 18 10 | NOT NAMED | 38.2 | 52.2 | 60  | 0 |
| 1926 10 24 | 0 10  | NOT NAMED | 39.2 | 50.1 | 60  | 0 |
| 1926 10 24 | 6 10  | NOT NAMED | 40.2 | 48.3 | 60  | 0 |
| 1926 10 24 | 12 10 | NOT NAMED | 41.0 | 46.7 | 60  | 0 |
| 1926 10 24 | 18 10 | NOT NAMED | 45.4 | 41.0 | 55  | 0 |
| 1926 11 12 | 6 11  | NOT NAMED | 11.2 | 78.6 | 35  | 0 |

|      |    |    |    |    |           |      |      |     |   |
|------|----|----|----|----|-----------|------|------|-----|---|
| 1926 | 11 | 12 | 12 | 11 | NOT NAMED | 12.1 | 79.2 | 35  | 0 |
| 1926 | 11 | 12 | 18 | 11 | NOT NAMED | 12.2 | 79.5 | 35  | 0 |
| 1926 | 11 | 13 | 0  | 11 | NOT NAMED | 12.6 | 80.0 | 35  | 0 |
| 1926 | 11 | 13 | 6  | 11 | NOT NAMED | 13.1 | 80.5 | 35  | 0 |
| 1926 | 11 | 13 | 12 | 11 | NOT NAMED | 13.7 | 81.1 | 35  | 0 |
| 1926 | 11 | 13 | 18 | 11 | NOT NAMED | 14.5 | 81.9 | 35  | 0 |
| 1926 | 11 | 14 | 0  | 11 | NOT NAMED | 15.4 | 82.9 | 35  | 0 |
| 1926 | 11 | 14 | 6  | 11 | NOT NAMED | 16.4 | 84.0 | 35  | 0 |
| 1926 | 11 | 14 | 12 | 11 | NOT NAMED | 17.2 | 84.8 | 35  | 0 |
| 1926 | 11 | 14 | 18 | 11 | NOT NAMED | 18.0 | 85.3 | 35  | 0 |
| 1926 | 11 | 15 | 0  | 11 | NOT NAMED | 18.7 | 85.6 | 35  | 0 |
| 1926 | 11 | 15 | 6  | 11 | NOT NAMED | 19.4 | 85.6 | 35  | 0 |
| 1926 | 11 | 15 | 12 | 11 | NOT NAMED | 20.1 | 85.5 | 35  | 0 |
| 1926 | 11 | 15 | 18 | 11 | NOT NAMED | 21.5 | 84.3 | 35  | 0 |
| 1926 | 11 | 16 | 0  | 11 | NOT NAMED | 22.4 | 82.8 | 35  | 0 |
| 1926 | 11 | 16 | 6  | 11 | NOT NAMED | 24.0 | 79.2 | 30  | 0 |
| 1927 | 8  | 19 | 12 | 1  | NOT NAMED | 15.2 | 45.0 | 60  | 0 |
| 1927 | 8  | 19 | 18 | 1  | NOT NAMED | 15.6 | 47.5 | 65  | 0 |
| 1927 | 8  | 20 | 0  | 1  | NOT NAMED | 16.1 | 49.8 | 70  | 0 |
| 1927 | 8  | 20 | 6  | 1  | NOT NAMED | 16.6 | 51.9 | 75  | 0 |
| 1927 | 8  | 20 | 12 | 1  | NOT NAMED | 17.2 | 53.7 | 80  | 0 |
| 1927 | 8  | 20 | 18 | 1  | NOT NAMED | 17.8 | 55.2 | 85  | 0 |
| 1927 | 8  | 21 | 0  | 1  | NOT NAMED | 18.3 | 56.5 | 90  | 0 |
| 1927 | 8  | 21 | 6  | 1  | NOT NAMED | 19.1 | 57.9 | 90  | 0 |
| 1927 | 8  | 21 | 12 | 1  | NOT NAMED | 20.2 | 59.4 | 95  | 0 |
| 1927 | 8  | 21 | 18 | 1  | NOT NAMED | 21.5 | 61.1 | 100 | 0 |
| 1927 | 8  | 22 | 0  | 1  | NOT NAMED | 22.9 | 62.8 | 100 | 0 |
| 1927 | 8  | 22 | 6  | 1  | NOT NAMED | 24.2 | 64.5 | 100 | 0 |
| 1927 | 8  | 22 | 12 | 1  | NOT NAMED | 25.6 | 66.2 | 105 | 0 |
| 1927 | 8  | 22 | 18 | 1  | NOT NAMED | 27.0 | 67.8 | 105 | 0 |
| 1927 | 8  | 23 | 0  | 1  | NOT NAMED | 28.3 | 69.2 | 105 | 0 |
| 1927 | 8  | 23 | 6  | 1  | NOT NAMED | 29.7 | 70.6 | 105 | 0 |
| 1927 | 8  | 23 | 12 | 1  | NOT NAMED | 31.1 | 72.0 | 105 | 0 |
| 1927 | 8  | 23 | 18 | 1  | NOT NAMED | 32.6 | 72.8 | 100 | 0 |
| 1927 | 8  | 24 | 0  | 1  | NOT NAMED | 34.2 | 73.1 | 100 | 0 |
| 1927 | 8  | 24 | 6  | 1  | NOT NAMED | 36.0 | 73.0 | 95  | 0 |
| 1927 | 8  | 24 | 12 | 1  | NOT NAMED | 38.0 | 72.4 | 95  | 0 |
| 1927 | 8  | 24 | 18 | 1  | NOT NAMED | 40.8 | 70.0 | 90  | 0 |
| 1927 | 8  | 25 | 0  | 1  | NOT NAMED | 44.5 | 65.5 | 90  | 0 |
| 1927 | 8  | 25 | 6  | 1  | NOT NAMED | 48.5 | 59.7 | 90  | 0 |
| 1927 | 8  | 25 | 12 | 1  | NOT NAMED | 51.8 | 54.8 | 90  | 0 |
| 1927 | 8  | 25 | 18 | 1  | NOT NAMED | 54.4 | 50.2 | 90  | 0 |
| 1927 | 8  | 26 | 0  | 1  | NOT NAMED | 56.8 | 44.2 | 90  | 0 |
| 1927 | 8  | 26 | 6  | 1  | NOT NAMED | 58.6 | 39.0 | 85  | 0 |

|      |   |    |    |   |           |      |      |    |   |
|------|---|----|----|---|-----------|------|------|----|---|
| 1927 | 8 | 26 | 12 | 1 | NOT NAMED | 61.0 | 32.3 | 80 | 0 |
| 1927 | 9 | 1  | 12 | 2 | NOT NAMED | 16.8 | 19.3 | 35 | 0 |
| 1927 | 9 | 1  | 18 | 2 | NOT NAMED | 16.5 | 19.9 | 35 | 0 |
| 1927 | 9 | 2  | 0  | 2 | NOT NAMED | 16.3 | 20.5 | 35 | 0 |
| 1927 | 9 | 2  | 6  | 2 | NOT NAMED | 16.1 | 21.1 | 35 | 0 |
| 1927 | 9 | 2  | 12 | 2 | NOT NAMED | 16.0 | 21.7 | 35 | 0 |
| 1927 | 9 | 2  | 18 | 2 | NOT NAMED | 15.9 | 22.3 | 35 | 0 |
| 1927 | 9 | 3  | 0  | 2 | NOT NAMED | 15.9 | 23.0 | 35 | 0 |
| 1927 | 9 | 3  | 6  | 2 | NOT NAMED | 15.9 | 23.8 | 35 | 0 |
| 1927 | 9 | 3  | 12 | 2 | NOT NAMED | 15.9 | 24.6 | 35 | 0 |
| 1927 | 9 | 3  | 18 | 2 | NOT NAMED | 15.9 | 25.6 | 35 | 0 |
| 1927 | 9 | 4  | 0  | 2 | NOT NAMED | 16.0 | 26.6 | 35 | 0 |
| 1927 | 9 | 4  | 6  | 2 | NOT NAMED | 16.1 | 27.7 | 35 | 0 |
| 1927 | 9 | 4  | 12 | 2 | NOT NAMED | 16.2 | 28.8 | 40 | 0 |
| 1927 | 9 | 4  | 18 | 2 | NOT NAMED | 16.3 | 29.9 | 40 | 0 |
| 1927 | 9 | 5  | 0  | 2 | NOT NAMED | 16.5 | 31.0 | 40 | 0 |
| 1927 | 9 | 5  | 6  | 2 | NOT NAMED | 16.6 | 32.1 | 45 | 0 |
| 1927 | 9 | 5  | 12 | 2 | NOT NAMED | 16.8 | 33.4 | 45 | 0 |
| 1927 | 9 | 5  | 18 | 2 | NOT NAMED | 17.0 | 34.8 | 50 | 0 |
| 1927 | 9 | 6  | 0  | 2 | NOT NAMED | 17.2 | 36.2 | 50 | 0 |
| 1927 | 9 | 6  | 6  | 2 | NOT NAMED | 17.4 | 37.6 | 55 | 0 |
| 1927 | 9 | 6  | 12 | 2 | NOT NAMED | 17.6 | 39.0 | 55 | 0 |
| 1927 | 9 | 6  | 18 | 2 | NOT NAMED | 17.8 | 40.4 | 60 | 0 |
| 1927 | 9 | 7  | 0  | 2 | NOT NAMED | 18.1 | 41.8 | 65 | 0 |
| 1927 | 9 | 7  | 6  | 2 | NOT NAMED | 18.4 | 43.3 | 65 | 0 |
| 1927 | 9 | 7  | 12 | 2 | NOT NAMED | 18.7 | 44.7 | 70 | 0 |
| 1927 | 9 | 7  | 18 | 2 | NOT NAMED | 19.1 | 46.3 | 70 | 0 |
| 1927 | 9 | 8  | 0  | 2 | NOT NAMED | 19.5 | 48.1 | 75 | 0 |
| 1927 | 9 | 8  | 6  | 2 | NOT NAMED | 19.9 | 49.9 | 75 | 0 |
| 1927 | 9 | 8  | 12 | 2 | NOT NAMED | 20.4 | 51.7 | 80 | 0 |
| 1927 | 9 | 8  | 18 | 2 | NOT NAMED | 21.2 | 53.6 | 85 | 0 |
| 1927 | 9 | 9  | 0  | 2 | NOT NAMED | 21.8 | 54.9 | 85 | 0 |
| 1927 | 9 | 9  | 6  | 2 | NOT NAMED | 22.5 | 56.0 | 90 | 0 |
| 1927 | 9 | 9  | 12 | 2 | NOT NAMED | 23.1 | 56.9 | 90 | 0 |
| 1927 | 9 | 9  | 18 | 2 | NOT NAMED | 24.7 | 58.0 | 90 | 0 |
| 1927 | 9 | 10 | 0  | 2 | NOT NAMED | 27.2 | 58.0 | 85 | 0 |
| 1927 | 9 | 10 | 6  | 2 | NOT NAMED | 29.8 | 56.5 | 80 | 0 |
| 1927 | 9 | 10 | 12 | 2 | NOT NAMED | 31.7 | 53.8 | 70 | 0 |
| 1927 | 9 | 10 | 18 | 2 | NOT NAMED | 32.4 | 53.1 | 60 | 0 |
| 1927 | 9 | 11 | 0  | 2 | NOT NAMED | 33.0 | 52.3 | 50 | 0 |
| 1927 | 9 | 11 | 6  | 2 | NOT NAMED | 33.5 | 51.7 | 45 | 0 |
| 1927 | 9 | 11 | 12 | 2 | NOT NAMED | 33.9 | 51.0 | 40 | 0 |
| 1927 | 9 | 11 | 18 | 2 | NOT NAMED | 34.3 | 49.8 | 35 | 0 |
| 1927 | 9 | 22 | 12 | 3 | NOT NAMED | 10.3 | 35.2 | 35 | 0 |

|      |         |             |      |      |     |   |
|------|---------|-------------|------|------|-----|---|
| 1927 | 9 22 18 | 3 NOT NAMED | 10.8 | 36.0 | 35  | 0 |
| 1927 | 9 23 0  | 3 NOT NAMED | 11.3 | 36.8 | 35  | 0 |
| 1927 | 9 23 6  | 3 NOT NAMED | 11.8 | 37.4 | 35  | 0 |
| 1927 | 9 23 12 | 3 NOT NAMED | 12.2 | 38.0 | 35  | 0 |
| 1927 | 9 23 18 | 3 NOT NAMED | 12.6 | 38.5 | 35  | 0 |
| 1927 | 9 24 0  | 3 NOT NAMED | 13.0 | 39.0 | 35  | 0 |
| 1927 | 9 24 6  | 3 NOT NAMED | 13.4 | 39.5 | 35  | 0 |
| 1927 | 9 24 12 | 3 NOT NAMED | 13.8 | 40.0 | 35  | 0 |
| 1927 | 9 24 18 | 3 NOT NAMED | 14.2 | 40.5 | 35  | 0 |
| 1927 | 9 25 0  | 3 NOT NAMED | 14.5 | 41.0 | 35  | 0 |
| 1927 | 9 25 6  | 3 NOT NAMED | 14.9 | 41.5 | 35  | 0 |
| 1927 | 9 25 12 | 3 NOT NAMED | 15.3 | 42.0 | 35  | 0 |
| 1927 | 9 25 18 | 3 NOT NAMED | 15.7 | 42.5 | 35  | 0 |
| 1927 | 9 26 0  | 3 NOT NAMED | 16.2 | 43.0 | 35  | 0 |
| 1927 | 9 26 6  | 3 NOT NAMED | 16.8 | 43.6 | 35  | 0 |
| 1927 | 9 26 12 | 3 NOT NAMED | 17.4 | 44.1 | 35  | 0 |
| 1927 | 9 26 18 | 3 NOT NAMED | 18.0 | 44.6 | 35  | 0 |
| 1927 | 9 27 0  | 3 NOT NAMED | 18.7 | 45.0 | 35  | 0 |
| 1927 | 9 27 6  | 3 NOT NAMED | 19.3 | 45.5 | 40  | 0 |
| 1927 | 9 27 12 | 3 NOT NAMED | 20.0 | 45.8 | 45  | 0 |
| 1927 | 9 27 18 | 3 NOT NAMED | 20.7 | 46.0 | 45  | 0 |
| 1927 | 9 28 0  | 3 NOT NAMED | 21.6 | 46.1 | 50  | 0 |
| 1927 | 9 28 6  | 3 NOT NAMED | 22.5 | 46.2 | 55  | 0 |
| 1927 | 9 28 12 | 3 NOT NAMED | 23.6 | 46.3 | 60  | 0 |
| 1927 | 9 28 18 | 3 NOT NAMED | 25.2 | 46.7 | 60  | 0 |
| 1927 | 9 29 0  | 3 NOT NAMED | 27.8 | 47.2 | 65  | 0 |
| 1927 | 9 29 6  | 3 NOT NAMED | 31.0 | 47.3 | 70  | 0 |
| 1927 | 9 29 12 | 3 NOT NAMED | 34.6 | 47.6 | 70  | 0 |
| 1927 | 9 29 18 | 3 NOT NAMED | 41.0 | 46.0 | 70  | 0 |
| 1927 | 9 23 0  | 4 NOT NAMED | 18.2 | 48.2 | 35  | 0 |
| 1927 | 9 23 6  | 4 NOT NAMED | 19.9 | 49.8 | 40  | 0 |
| 1927 | 9 23 12 | 4 NOT NAMED | 21.3 | 51.2 | 45  | 0 |
| 1927 | 9 23 18 | 4 NOT NAMED | 22.1 | 52.3 | 50  | 0 |
| 1927 | 9 24 0  | 4 NOT NAMED | 22.4 | 53.4 | 55  | 0 |
| 1927 | 9 24 6  | 4 NOT NAMED | 23.7 | 54.4 | 60  | 0 |
| 1927 | 9 24 12 | 4 NOT NAMED | 24.5 | 55.4 | 65  | 0 |
| 1927 | 9 24 18 | 4 NOT NAMED | 25.4 | 56.3 | 70  | 0 |
| 1927 | 9 25 0  | 4 NOT NAMED | 26.3 | 57.2 | 75  | 0 |
| 1927 | 9 25 6  | 4 NOT NAMED | 27.2 | 58.0 | 80  | 0 |
| 1927 | 9 25 12 | 4 NOT NAMED | 28.1 | 58.8 | 85  | 0 |
| 1927 | 9 25 18 | 4 NOT NAMED | 28.7 | 59.4 | 90  | 0 |
| 1927 | 9 26 0  | 4 NOT NAMED | 29.2 | 59.8 | 95  | 0 |
| 1927 | 9 26 6  | 4 NOT NAMED | 29.7 | 60.2 | 100 | 0 |
| 1927 | 9 26 12 | 4 NOT NAMED | 30.2 | 60.5 | 105 | 0 |

|      |    |    |    |             |      |      |     |   |
|------|----|----|----|-------------|------|------|-----|---|
| 1927 | 9  | 26 | 18 | 4 NOT NAMED | 31.6 | 61.3 | 105 | 0 |
| 1927 | 9  | 27 | 0  | 4 NOT NAMED | 33.7 | 61.5 | 105 | 0 |
| 1927 | 9  | 27 | 6  | 4 NOT NAMED | 35.7 | 60.9 | 100 | 0 |
| 1927 | 9  | 27 | 12 | 4 NOT NAMED | 37.0 | 59.6 | 95  | 0 |
| 1927 | 9  | 27 | 18 | 4 NOT NAMED | 37.7 | 58.9 | 90  | 0 |
| 1927 | 9  | 28 | 0  | 4 NOT NAMED | 38.4 | 57.9 | 90  | 0 |
| 1927 | 9  | 28 | 6  | 4 NOT NAMED | 39.1 | 57.1 | 85  | 0 |
| 1927 | 9  | 28 | 12 | 4 NOT NAMED | 39.8 | 56.0 | 85  | 0 |
| 1927 | 9  | 28 | 18 | 4 NOT NAMED | 40.5 | 54.8 | 80  | 0 |
| 1927 | 9  | 29 | 0  | 4 NOT NAMED | 41.3 | 53.5 | 80  | 0 |
| 1927 | 9  | 29 | 6  | 4 NOT NAMED | 42.1 | 52.1 | 80  | 0 |
| 1927 | 9  | 29 | 12 | 4 NOT NAMED | 42.8 | 50.8 | 75  | 0 |
| 1927 | 9  | 29 | 18 | 4 NOT NAMED | 43.6 | 49.4 | 70  | 0 |
| 1927 | 9  | 30 | 0  | 4 NOT NAMED | 44.4 | 47.9 | 65  | 0 |
| 1927 | 9  | 30 | 6  | 4 NOT NAMED | 45.2 | 46.3 | 60  | 0 |
| 1927 | 9  | 30 | 12 | 4 NOT NAMED | 46.0 | 44.5 | 55  | 0 |
| 1927 | 9  | 30 | 18 | 4 NOT NAMED | 46.9 | 42.1 | 50  | 0 |
| 1927 | 10 | 1  | 0  | 4 NOT NAMED | 47.9 | 38.8 | 50  | 0 |
| 1927 | 10 | 1  | 6  | 4 NOT NAMED | 48.9 | 34.6 | 45  | 0 |
| 1927 | 10 | 1  | 12 | 4 NOT NAMED | 50.0 | 30.0 | 40  | 0 |
| 1927 | 10 | 1  | 18 | 4 NOT NAMED | 52.0 | 20.0 | 40  | 0 |
| 1927 | 10 | 1  | 0  | 5 NOT NAMED | 23.2 | 73.0 | 35  | 0 |
| 1927 | 10 | 1  | 6  | 5 NOT NAMED | 24.0 | 74.0 | 35  | 0 |
| 1927 | 10 | 1  | 12 | 5 NOT NAMED | 24.8 | 74.8 | 35  | 0 |
| 1927 | 10 | 1  | 18 | 5 NOT NAMED | 25.2 | 75.4 | 35  | 0 |
| 1927 | 10 | 2  | 0  | 5 NOT NAMED | 25.7 | 76.1 | 35  | 0 |
| 1927 | 10 | 2  | 6  | 5 NOT NAMED | 26.5 | 77.2 | 40  | 0 |
| 1927 | 10 | 2  | 12 | 5 NOT NAMED | 27.5 | 78.2 | 45  | 0 |
| 1927 | 10 | 2  | 18 | 5 NOT NAMED | 28.7 | 79.2 | 50  | 0 |
| 1927 | 10 | 3  | 0  | 5 NOT NAMED | 30.1 | 80.1 | 50  | 0 |
| 1927 | 10 | 3  | 6  | 5 NOT NAMED | 31.6 | 80.7 | 50  | 0 |
| 1927 | 10 | 3  | 12 | 5 NOT NAMED | 33.4 | 81.0 | 40  | 0 |
| 1927 | 10 | 3  | 18 | 5 NOT NAMED | 35.0 | 80.7 | 35  | 0 |
| 1927 | 10 | 4  | 0  | 5 NOT NAMED | 37.0 | 79.5 | 30  | 0 |
| 1927 | 10 | 4  | 6  | 5 NOT NAMED | 39.0 | 77.5 | 25  | 0 |
| 1927 | 10 | 17 | 0  | 6 NOT NAMED | 18.5 | 86.5 | 40  | 0 |
| 1927 | 10 | 17 | 6  | 6 NOT NAMED | 18.7 | 85.5 | 40  | 0 |
| 1927 | 10 | 17 | 12 | 6 NOT NAMED | 18.8 | 84.3 | 40  | 0 |
| 1927 | 10 | 17 | 18 | 6 NOT NAMED | 18.8 | 83.3 | 40  | 0 |
| 1927 | 10 | 18 | 0  | 6 NOT NAMED | 19.2 | 82.2 | 40  | 0 |
| 1927 | 10 | 18 | 6  | 6 NOT NAMED | 19.1 | 80.9 | 40  | 0 |
| 1927 | 10 | 18 | 12 | 6 NOT NAMED | 19.5 | 79.5 | 40  | 0 |
| 1927 | 10 | 18 | 18 | 6 NOT NAMED | 19.8 | 77.9 | 40  | 0 |
| 1927 | 10 | 19 | 0  | 6 NOT NAMED | 20.0 | 76.2 | 35  | 0 |

|      |    |    |    |             |      |      |    |     |
|------|----|----|----|-------------|------|------|----|-----|
| 1927 | 10 | 19 | 6  | 6 NOT NAMED | 21.4 | 74.3 | 35 | 0   |
| 1927 | 10 | 19 | 12 | 6 NOT NAMED | 23.3 | 72.3 | 35 | 0   |
| 1927 | 10 | 19 | 18 | 6 NOT NAMED | 26.0 | 70.2 | 35 | 0   |
| 1927 | 10 | 30 | 18 | 7 NOT NAMED | 18.8 | 83.0 | 35 | 0   |
| 1927 | 10 | 31 | 0  | 7 NOT NAMED | 19.7 | 81.8 | 35 | 0   |
| 1927 | 10 | 31 | 6  | 7 NOT NAMED | 20.4 | 80.6 | 40 | 0   |
| 1927 | 10 | 31 | 12 | 7 NOT NAMED | 20.9 | 80.0 | 40 | 0   |
| 1927 | 10 | 31 | 18 | 7 NOT NAMED | 21.4 | 79.6 | 40 | 0   |
| 1927 | 11 | 1  | 0  | 7 NOT NAMED | 22.0 | 79.0 | 35 | 0   |
| 1927 | 11 | 1  | 6  | 7 NOT NAMED | 22.7 | 78.4 | 35 | 0   |
| 1927 | 11 | 1  | 12 | 7 NOT NAMED | 23.6 | 77.7 | 35 | 0   |
| 1927 | 11 | 1  | 18 | 7 NOT NAMED | 24.7 | 76.8 | 35 | 0   |
| 1927 | 11 | 2  | 0  | 7 NOT NAMED | 26.1 | 75.7 | 35 | 0   |
| 1927 | 11 | 2  | 6  | 7 NOT NAMED | 27.5 | 74.6 | 35 | 0   |
| 1927 | 11 | 2  | 12 | 7 NOT NAMED | 28.6 | 73.7 | 35 | 0   |
| 1927 | 11 | 2  | 18 | 7 NOT NAMED | 29.5 | 73.2 | 35 | 0   |
| 1927 | 11 | 3  | 0  | 7 NOT NAMED | 30.3 | 72.9 | 35 | 0   |
| 1927 | 11 | 3  | 6  | 7 NOT NAMED | 30.9 | 72.8 | 35 | 0   |
| 1927 | 11 | 3  | 12 | 7 NOT NAMED | 31.4 | 72.7 | 30 | 0   |
| 1927 | 11 | 3  | 18 | 7 NOT NAMED | 32.1 | 72.7 | 30 | 0   |
| 1927 | 11 | 4  | 0  | 7 NOT NAMED | 33.2 | 72.7 | 30 | 0   |
| 1927 | 11 | 4  | 6  | 7 NOT NAMED | 35.9 | 72.7 | 30 | 0   |
| 1928 | 8  | 3  | 0  | 1 NOT NAMED | 11.3 | 60.7 | 35 | 0   |
| 1928 | 8  | 3  | 6  | 1 NOT NAMED | 12.3 | 62.1 | 35 | 0   |
| 1928 | 8  | 3  | 12 | 1 NOT NAMED | 13.3 | 63.6 | 35 | 0   |
| 1928 | 8  | 3  | 18 | 1 NOT NAMED | 14.2 | 65.2 | 35 | 0   |
| 1928 | 8  | 4  | 0  | 1 NOT NAMED | 15.0 | 66.0 | 35 | 0   |
| 1928 | 8  | 4  | 6  | 1 NOT NAMED | 16.0 | 67.0 | 35 | 0   |
| 1928 | 8  | 4  | 12 | 1 NOT NAMED | 16.7 | 67.8 | 35 | 0   |
| 1928 | 8  | 4  | 18 | 1 NOT NAMED | 17.6 | 69.0 | 40 | 0   |
| 1928 | 8  | 5  | 0  | 1 NOT NAMED | 18.5 | 70.0 | 40 | 0   |
| 1928 | 8  | 5  | 6  | 1 NOT NAMED | 19.4 | 70.9 | 40 | 0   |
| 1928 | 8  | 5  | 12 | 1 NOT NAMED | 20.3 | 72.0 | 35 | 0   |
| 1928 | 8  | 5  | 18 | 1 NOT NAMED | 21.2 | 73.1 | 40 | 0   |
| 1928 | 8  | 6  | 0  | 1 NOT NAMED | 22.1 | 74.3 | 45 | 0   |
| 1928 | 8  | 6  | 6  | 1 NOT NAMED | 23.0 | 75.4 | 55 | 0   |
| 1928 | 8  | 6  | 12 | 1 NOT NAMED | 23.8 | 76.5 | 65 | 0   |
| 1928 | 8  | 6  | 18 | 1 NOT NAMED | 24.5 | 77.4 | 70 | 0   |
| 1928 | 8  | 7  | 0  | 1 NOT NAMED | 25.1 | 78.1 | 80 | 0   |
| 1928 | 8  | 7  | 6  | 1 NOT NAMED | 25.5 | 78.6 | 80 | 0   |
| 1928 | 8  | 7  | 12 | 1 NOT NAMED | 26.0 | 79.1 | 85 | 0   |
| 1928 | 8  | 7  | 18 | 1 NOT NAMED | 26.5 | 79.5 | 85 | 0   |
| 1928 | 8  | 8  | 0  | 1 NOT NAMED | 26.9 | 79.9 | 85 | 0   |
| 1928 | 8  | 8  | 6  | 1 NOT NAMED | 27.4 | 80.3 | 80 | 977 |

|      |   |    |    |   |           |      |      |    |   |
|------|---|----|----|---|-----------|------|------|----|---|
| 1928 | 8 | 8  | 12 | 1 | NOT NAMED | 27.8 | 80.7 | 70 | 0 |
| 1928 | 8 | 8  | 18 | 1 | NOT NAMED | 28.2 | 81.2 | 50 | 0 |
| 1928 | 8 | 9  | 0  | 1 | NOT NAMED | 28.6 | 81.7 | 40 | 0 |
| 1928 | 8 | 9  | 6  | 1 | NOT NAMED | 29.0 | 82.2 | 40 | 0 |
| 1928 | 8 | 9  | 12 | 1 | NOT NAMED | 29.4 | 82.7 | 35 | 0 |
| 1928 | 8 | 9  | 18 | 1 | NOT NAMED | 29.8 | 83.2 | 35 | 0 |
| 1928 | 8 | 10 | 0  | 1 | NOT NAMED | 30.3 | 83.8 | 35 | 0 |
| 1928 | 8 | 10 | 6  | 1 | NOT NAMED | 30.9 | 84.3 | 35 | 0 |
| 1928 | 8 | 10 | 12 | 1 | NOT NAMED | 31.7 | 84.8 | 35 | 0 |
| 1928 | 8 | 10 | 18 | 1 | NOT NAMED | 32.6 | 84.0 | 30 | 0 |
| 1928 | 8 | 11 | 0  | 1 | NOT NAMED | 33.5 | 82.9 | 30 | 0 |
| 1928 | 8 | 11 | 6  | 1 | NOT NAMED | 34.3 | 81.7 | 30 | 0 |
| 1928 | 8 | 11 | 12 | 1 | NOT NAMED | 35.2 | 80.5 | 30 | 0 |
| 1928 | 8 | 11 | 18 | 1 | NOT NAMED | 36.1 | 79.0 | 30 | 0 |
| 1928 | 8 | 12 | 0  | 1 | NOT NAMED | 37.0 | 77.5 | 30 | 0 |
| 1928 | 8 | 12 | 6  | 1 | NOT NAMED | 37.8 | 75.9 | 30 | 0 |
| 1928 | 8 | 12 | 12 | 1 | NOT NAMED | 38.7 | 74.1 | 30 | 0 |
| 1928 | 8 | 7  | 12 | 2 | NOT NAMED | 12.3 | 60.0 | 35 | 0 |
| 1928 | 8 | 7  | 18 | 2 | NOT NAMED | 12.8 | 60.8 | 35 | 0 |
| 1928 | 8 | 8  | 0  | 2 | NOT NAMED | 13.3 | 61.6 | 35 | 0 |
| 1928 | 8 | 8  | 6  | 2 | NOT NAMED | 13.8 | 62.5 | 40 | 0 |
| 1928 | 8 | 8  | 12 | 2 | NOT NAMED | 14.2 | 63.5 | 40 | 0 |
| 1928 | 8 | 8  | 18 | 2 | NOT NAMED | 14.6 | 64.6 | 45 | 0 |
| 1928 | 8 | 9  | 0  | 2 | NOT NAMED | 15.0 | 65.5 | 50 | 0 |
| 1928 | 8 | 9  | 6  | 2 | NOT NAMED | 15.4 | 66.9 | 55 | 0 |
| 1928 | 8 | 9  | 12 | 2 | NOT NAMED | 15.8 | 68.0 | 60 | 0 |
| 1928 | 8 | 9  | 18 | 2 | NOT NAMED | 16.2 | 68.9 | 65 | 0 |
| 1928 | 8 | 10 | 0  | 2 | NOT NAMED | 16.5 | 69.8 | 70 | 0 |
| 1928 | 8 | 10 | 6  | 2 | NOT NAMED | 16.9 | 70.7 | 70 | 0 |
| 1928 | 8 | 10 | 12 | 2 | NOT NAMED | 17.3 | 71.6 | 70 | 0 |
| 1928 | 8 | 10 | 18 | 2 | NOT NAMED | 17.9 | 72.7 | 70 | 0 |
| 1928 | 8 | 11 | 0  | 2 | NOT NAMED | 18.6 | 73.7 | 70 | 0 |
| 1928 | 8 | 11 | 6  | 2 | NOT NAMED | 19.4 | 74.8 | 70 | 0 |
| 1928 | 8 | 11 | 12 | 2 | NOT NAMED | 20.1 | 75.9 | 60 | 0 |
| 1928 | 8 | 11 | 18 | 2 | NOT NAMED | 20.7 | 77.0 | 60 | 0 |
| 1928 | 8 | 12 | 0  | 2 | NOT NAMED | 21.3 | 78.0 | 50 | 0 |
| 1928 | 8 | 12 | 6  | 2 | NOT NAMED | 22.0 | 79.0 | 45 | 0 |
| 1928 | 8 | 12 | 12 | 2 | NOT NAMED | 22.7 | 79.8 | 45 | 0 |
| 1928 | 8 | 12 | 18 | 2 | NOT NAMED | 23.5 | 80.5 | 45 | 0 |
| 1928 | 8 | 13 | 0  | 2 | NOT NAMED | 24.4 | 81.1 | 45 | 0 |
| 1928 | 8 | 13 | 6  | 2 | NOT NAMED | 25.2 | 81.6 | 50 | 0 |
| 1928 | 8 | 13 | 12 | 2 | NOT NAMED | 26.0 | 82.2 | 50 | 0 |
| 1928 | 8 | 13 | 18 | 2 | NOT NAMED | 26.8 | 82.8 | 55 | 0 |
| 1928 | 8 | 14 | 0  | 2 | NOT NAMED | 27.6 | 83.3 | 50 | 0 |



|      |         |   |             |      |      |    |   |
|------|---------|---|-------------|------|------|----|---|
| 1928 | 8 14    | 6 | 2 NOT NAMED | 28.5 | 83.9 | 50 | 0 |
| 1928 | 8 14 12 |   | 2 NOT NAMED | 29.3 | 84.4 | 45 | 0 |
| 1928 | 8 14 18 |   | 2 NOT NAMED | 30.2 | 84.9 | 40 | 0 |
| 1928 | 8 15    | 0 | 2 NOT NAMED | 31.3 | 85.4 | 40 | 0 |
| 1928 | 8 15    | 6 | 2 NOT NAMED | 32.4 | 85.6 | 35 | 0 |
| 1928 | 8 15 12 |   | 2 NOT NAMED | 33.4 | 85.4 | 35 | 0 |
| 1928 | 8 15 18 |   | 2 NOT NAMED | 34.4 | 84.8 | 30 | 0 |
| 1928 | 8 16    | 0 | 2 NOT NAMED | 35.3 | 84.2 | 30 | 0 |
| 1928 | 8 16    | 6 | 2 NOT NAMED | 36.2 | 83.5 | 30 | 0 |
| 1928 | 8 16 12 |   | 2 NOT NAMED | 37.1 | 82.7 | 25 | 0 |
| 1928 | 8 16 18 |   | 2 NOT NAMED | 37.9 | 82.0 | 25 | 0 |
| 1928 | 8 17    | 0 | 2 NOT NAMED | 38.6 | 81.2 | 25 | 0 |
| 1928 | 8 17    | 6 | 2 NOT NAMED | 39.2 | 80.5 | 20 | 0 |
| 1928 | 8 17 12 |   | 2 NOT NAMED | 39.7 | 79.7 | 20 | 0 |
| 1928 | 9 1 18  |   | 3 NOT NAMED | 17.2 | 72.8 | 35 | 0 |
| 1928 | 9 2     | 0 | 3 NOT NAMED | 17.3 | 74.1 | 35 | 0 |
| 1928 | 9 2     | 6 | 3 NOT NAMED | 17.4 | 75.4 | 35 | 0 |
| 1928 | 9 2 12  |   | 3 NOT NAMED | 17.6 | 76.7 | 35 | 0 |
| 1928 | 9 2 18  |   | 3 NOT NAMED | 17.9 | 78.0 | 35 | 0 |
| 1928 | 9 3     | 0 | 3 NOT NAMED | 18.2 | 79.3 | 35 | 0 |
| 1928 | 9 3     | 6 | 3 NOT NAMED | 18.4 | 80.5 | 40 | 0 |
| 1928 | 9 3 12  |   | 3 NOT NAMED | 18.6 | 81.5 | 40 | 0 |
| 1928 | 9 3 18  |   | 3 NOT NAMED | 18.7 | 82.4 | 45 | 0 |
| 1928 | 9 4     | 0 | 3 NOT NAMED | 18.8 | 83.3 | 50 | 0 |
| 1928 | 9 4     | 6 | 3 NOT NAMED | 18.9 | 84.1 | 50 | 0 |
| 1928 | 9 4 12  |   | 3 NOT NAMED | 19.0 | 85.0 | 50 | 0 |
| 1928 | 9 4 18  |   | 3 NOT NAMED | 19.2 | 85.8 | 50 | 0 |
| 1928 | 9 5     | 0 | 3 NOT NAMED | 19.4 | 86.7 | 50 | 0 |
| 1928 | 9 5     | 6 | 3 NOT NAMED | 19.6 | 87.5 | 50 | 0 |
| 1928 | 9 5 12  |   | 3 NOT NAMED | 19.8 | 88.4 | 40 | 0 |
| 1928 | 9 5 18  |   | 3 NOT NAMED | 20.0 | 89.3 | 35 | 0 |
| 1928 | 9 6     | 0 | 3 NOT NAMED | 20.3 | 90.3 | 35 | 0 |
| 1928 | 9 6     | 6 | 3 NOT NAMED | 20.5 | 91.3 | 40 | 0 |
| 1928 | 9 6 12  |   | 3 NOT NAMED | 20.8 | 92.2 | 40 | 0 |
| 1928 | 9 6 18  |   | 3 NOT NAMED | 21.1 | 93.0 | 45 | 0 |
| 1928 | 9 7     | 0 | 3 NOT NAMED | 21.4 | 93.8 | 45 | 0 |
| 1928 | 9 7     | 6 | 3 NOT NAMED | 21.7 | 94.5 | 45 | 0 |
| 1928 | 9 7 12  |   | 3 NOT NAMED | 22.0 | 95.1 | 45 | 0 |
| 1928 | 9 7 18  |   | 3 NOT NAMED | 22.3 | 95.7 | 45 | 0 |
| 1928 | 9 8     | 0 | 3 NOT NAMED | 22.7 | 96.4 | 45 | 0 |
| 1928 | 9 8     | 6 | 3 NOT NAMED | 23.1 | 97.3 | 40 | 0 |
| 1928 | 9 8 12  |   | 3 NOT NAMED | 24.0 | 98.5 | 35 | 0 |
| 1928 | 9 8 18  |   | 3 NOT NAMED | 24.8 | 99.3 | 30 | 0 |
| 1928 | 9 6 12  |   | 4 NOT NAMED | 13.7 | 20.4 | 35 | 0 |

|      |   |    |    |             |      |      |     |     |
|------|---|----|----|-------------|------|------|-----|-----|
| 1928 | 9 | 6  | 18 | 4 NOT NAMED | 13.8 | 22.1 | 35  | 0   |
| 1928 | 9 | 7  | 0  | 4 NOT NAMED | 13.9 | 23.9 | 35  | 0   |
| 1928 | 9 | 7  | 6  | 4 NOT NAMED | 14.0 | 25.7 | 35  | 0   |
| 1928 | 9 | 7  | 12 | 4 NOT NAMED | 14.1 | 27.5 | 35  | 0   |
| 1928 | 9 | 7  | 18 | 4 NOT NAMED | 14.2 | 29.4 | 35  | 0   |
| 1928 | 9 | 8  | 0  | 4 NOT NAMED | 14.4 | 31.5 | 35  | 0   |
| 1928 | 9 | 8  | 6  | 4 NOT NAMED | 14.6 | 33.5 | 40  | 0   |
| 1928 | 9 | 8  | 12 | 4 NOT NAMED | 14.7 | 35.2 | 40  | 0   |
| 1928 | 9 | 8  | 18 | 4 NOT NAMED | 14.8 | 36.7 | 40  | 0   |
| 1928 | 9 | 9  | 0  | 4 NOT NAMED | 14.8 | 38.2 | 45  | 0   |
| 1928 | 9 | 9  | 6  | 4 NOT NAMED | 14.8 | 39.6 | 50  | 0   |
| 1928 | 9 | 9  | 12 | 4 NOT NAMED | 14.9 | 41.1 | 50  | 0   |
| 1928 | 9 | 9  | 18 | 4 NOT NAMED | 15.0 | 42.6 | 55  | 0   |
| 1928 | 9 | 10 | 0  | 4 NOT NAMED | 15.1 | 44.0 | 55  | 0   |
| 1928 | 9 | 10 | 6  | 4 NOT NAMED | 15.2 | 45.4 | 60  | 0   |
| 1928 | 9 | 10 | 12 | 4 NOT NAMED | 15.3 | 46.9 | 60  | 0   |
| 1928 | 9 | 10 | 18 | 4 NOT NAMED | 15.4 | 48.6 | 65  | 0   |
| 1928 | 9 | 11 | 0  | 4 NOT NAMED | 15.5 | 50.5 | 70  | 0   |
| 1928 | 9 | 11 | 6  | 4 NOT NAMED | 15.5 | 52.5 | 75  | 0   |
| 1928 | 9 | 11 | 12 | 4 NOT NAMED | 15.6 | 54.2 | 80  | 0   |
| 1928 | 9 | 11 | 18 | 4 NOT NAMED | 15.7 | 55.7 | 85  | 0   |
| 1928 | 9 | 12 | 0  | 4 NOT NAMED | 15.8 | 57.2 | 95  | 0   |
| 1928 | 9 | 12 | 6  | 4 NOT NAMED | 15.9 | 58.6 | 100 | 0   |
| 1928 | 9 | 12 | 12 | 4 NOT NAMED | 16.0 | 59.9 | 105 | 0   |
| 1928 | 9 | 12 | 18 | 4 NOT NAMED | 16.2 | 61.1 | 110 | 940 |
| 1928 | 9 | 13 | 0  | 4 NOT NAMED | 16.5 | 62.3 | 115 | 0   |
| 1928 | 9 | 13 | 6  | 4 NOT NAMED | 16.9 | 63.5 | 120 | 0   |
| 1928 | 9 | 13 | 12 | 4 NOT NAMED | 17.4 | 64.7 | 135 | 0   |
| 1928 | 9 | 13 | 18 | 4 NOT NAMED | 17.9 | 65.8 | 140 | 931 |
| 1928 | 9 | 14 | 0  | 4 NOT NAMED | 18.5 | 67.0 | 140 | 0   |
| 1928 | 9 | 14 | 6  | 4 NOT NAMED | 19.0 | 68.0 | 135 | 0   |
| 1928 | 9 | 14 | 12 | 4 NOT NAMED | 19.6 | 69.1 | 135 | 0   |
| 1928 | 9 | 14 | 18 | 4 NOT NAMED | 20.0 | 70.0 | 135 | 0   |
| 1928 | 9 | 15 | 0  | 4 NOT NAMED | 20.6 | 70.8 | 135 | 0   |
| 1928 | 9 | 15 | 6  | 4 NOT NAMED | 21.3 | 71.6 | 135 | 0   |
| 1928 | 9 | 15 | 12 | 4 NOT NAMED | 22.2 | 72.7 | 135 | 0   |
| 1928 | 9 | 15 | 18 | 4 NOT NAMED | 22.8 | 73.6 | 135 | 0   |
| 1928 | 9 | 16 | 0  | 4 NOT NAMED | 23.5 | 74.8 | 135 | 0   |
| 1928 | 9 | 16 | 6  | 4 NOT NAMED | 24.3 | 76.0 | 135 | 0   |
| 1928 | 9 | 16 | 12 | 4 NOT NAMED | 25.1 | 77.2 | 135 | 0   |
| 1928 | 9 | 16 | 18 | 4 NOT NAMED | 25.8 | 78.3 | 130 | 0   |
| 1928 | 9 | 17 | 0  | 4 NOT NAMED | 26.5 | 79.5 | 130 | 929 |
| 1928 | 9 | 17 | 6  | 4 NOT NAMED | 27.1 | 80.1 | 115 | 0   |
| 1928 | 9 | 17 | 12 | 4 NOT NAMED | 27.8 | 81.5 | 110 | 955 |

|      |          |             |      |      |    |      |
|------|----------|-------------|------|------|----|------|
| 1928 | 9 17 18  | 4 NOT NAMED | 28.8 | 82.0 | 90 | 0    |
| 1928 | 9 18 0   | 4 NOT NAMED | 30.0 | 81.9 | 80 | 974  |
| 1928 | 9 18 6   | 4 NOT NAMED | 31.3 | 81.5 | 75 | 0    |
| 1928 | 9 18 12  | 4 NOT NAMED | 32.5 | 80.8 | 60 | 978  |
| 1928 | 9 18 18  | 4 NOT NAMED | 33.1 | 80.0 | 60 | 0    |
| 1928 | 9 19 0   | 4 NOT NAMED | 34.1 | 78.6 | 50 | 981  |
| 1928 | 9 19 6   | 4 NOT NAMED | 34.9 | 77.7 | 45 | 0    |
| 1928 | 9 19 12  | 4 NOT NAMED | 35.8 | 77.0 | 40 | 989  |
| 1928 | 9 19 18  | 4 NOT NAMED | 37.0 | 77.0 | 40 | 0    |
| 1928 | 9 20 0   | 4 NOT NAMED | 38.5 | 77.5 | 40 | 1002 |
| 1928 | 9 20 6   | 4 NOT NAMED | 40.2 | 78.0 | 40 | 0    |
| 1928 | 9 20 12  | 4 NOT NAMED | 42.0 | 78.4 | 35 | 1008 |
| 1928 | 9 20 18  | 4 NOT NAMED | 43.3 | 79.0 | 35 | 0    |
| 1928 | 9 8 12   | 5 NOT NAMED | 21.1 | 47.7 | 35 | 0    |
| 1928 | 9 8 18   | 5 NOT NAMED | 21.8 | 48.6 | 35 | 0    |
| 1928 | 9 9 0    | 5 NOT NAMED | 22.4 | 49.5 | 35 | 0    |
| 1928 | 9 9 6    | 5 NOT NAMED | 23.0 | 50.2 | 35 | 0    |
| 1928 | 9 9 12   | 5 NOT NAMED | 23.6 | 51.0 | 40 | 0    |
| 1928 | 9 9 18   | 5 NOT NAMED | 25.7 | 53.5 | 40 | 0    |
| 1928 | 9 10 0   | 5 NOT NAMED | 28.0 | 55.3 | 40 | 0    |
| 1928 | 9 10 6   | 5 NOT NAMED | 30.4 | 55.6 | 45 | 0    |
| 1928 | 9 10 12  | 5 NOT NAMED | 32.4 | 55.0 | 45 | 0    |
| 1928 | 9 10 18  | 5 NOT NAMED | 34.1 | 53.0 | 45 | 0    |
| 1928 | 9 11 0   | 5 NOT NAMED | 35.9 | 50.3 | 50 | 0    |
| 1928 | 9 11 6   | 5 NOT NAMED | 37.5 | 47.0 | 50 | 0    |
| 1928 | 9 11 12  | 5 NOT NAMED | 39.4 | 42.3 | 50 | 0    |
| 1928 | 9 11 18  | 5 NOT NAMED | 41.2 | 39.7 | 50 | 0    |
| 1928 | 9 12 0   | 5 NOT NAMED | 43.1 | 36.9 | 50 | 0    |
| 1928 | 9 12 6   | 5 NOT NAMED | 44.9 | 34.7 | 50 | 0    |
| 1928 | 9 12 12  | 5 NOT NAMED | 46.8 | 32.4 | 50 | 0    |
| 1928 | 9 12 18  | 5 NOT NAMED | 48.5 | 30.7 | 50 | 0    |
| 1928 | 10 10 12 | 6 NOT NAMED | 16.8 | 35.8 | 35 | 0    |
| 1928 | 10 10 18 | 6 NOT NAMED | 18.0 | 36.9 | 35 | 0    |
| 1928 | 10 11 0  | 6 NOT NAMED | 19.4 | 37.9 | 35 | 0    |
| 1928 | 10 11 6  | 6 NOT NAMED | 20.6 | 38.8 | 35 | 0    |
| 1928 | 10 11 12 | 6 NOT NAMED | 21.8 | 39.8 | 35 | 0    |
| 1928 | 10 11 18 | 6 NOT NAMED | 22.9 | 40.7 | 35 | 0    |
| 1928 | 10 12 0  | 6 NOT NAMED | 24.0 | 41.6 | 35 | 0    |
| 1928 | 10 12 6  | 6 NOT NAMED | 25.0 | 42.4 | 40 | 0    |
| 1928 | 10 12 12 | 6 NOT NAMED | 26.0 | 43.2 | 45 | 0    |
| 1928 | 10 12 18 | 6 NOT NAMED | 27.0 | 43.9 | 50 | 0    |
| 1928 | 10 13 0  | 6 NOT NAMED | 27.8 | 44.5 | 55 | 0    |
| 1928 | 10 13 6  | 6 NOT NAMED | 28.7 | 45.0 | 60 | 0    |
| 1928 | 10 13 12 | 6 NOT NAMED | 29.7 | 45.5 | 60 | 0    |

|      |    |    |    |   |           |      |      |     |     |
|------|----|----|----|---|-----------|------|------|-----|-----|
| 1928 | 10 | 13 | 18 | 6 | NOT NAMED | 30.9 | 45.9 | 70  | 0   |
| 1928 | 10 | 14 | 0  | 6 | NOT NAMED | 32.5 | 45.3 | 65  | 0   |
| 1928 | 10 | 14 | 6  | 6 | NOT NAMED | 34.3 | 44.0 | 60  | 0   |
| 1928 | 10 | 14 | 12 | 6 | NOT NAMED | 36.3 | 42.0 | 60  | 0   |
| 1928 | 10 | 14 | 18 | 6 | NOT NAMED | 38.0 | 40.0 | 60  | 0   |
| 1928 | 10 | 15 | 0  | 6 | NOT NAMED | 40.0 | 38.0 | 60  | 0   |
| 1929 | 6  | 27 | 0  | 1 | NOT NAMED | 21.3 | 93.3 | 35  | 0   |
| 1929 | 6  | 27 | 6  | 1 | NOT NAMED | 22.5 | 93.2 | 35  | 0   |
| 1929 | 6  | 27 | 12 | 1 | NOT NAMED | 23.6 | 93.3 | 45  | 0   |
| 1929 | 6  | 27 | 18 | 1 | NOT NAMED | 24.5 | 93.4 | 55  | 0   |
| 1929 | 6  | 28 | 0  | 1 | NOT NAMED | 25.5 | 93.7 | 65  | 0   |
| 1929 | 6  | 28 | 6  | 1 | NOT NAMED | 26.2 | 94.1 | 70  | 0   |
| 1929 | 6  | 28 | 12 | 1 | NOT NAMED | 27.0 | 94.8 | 75  | 0   |
| 1929 | 6  | 28 | 18 | 1 | NOT NAMED | 27.8 | 95.7 | 70  | 986 |
| 1929 | 6  | 29 | 0  | 1 | NOT NAMED | 28.5 | 96.9 | 60  | 0   |
| 1929 | 6  | 29 | 6  | 1 | NOT NAMED | 29.3 | 98.2 | 35  | 0   |
| 1929 | 6  | 29 | 12 | 1 | NOT NAMED | 30.0 | 99.8 | 30  | 0   |
| 1929 | 9  | 22 | 0  | 2 | NOT NAMED | 22.0 | 65.9 | 35  | 0   |
| 1929 | 9  | 22 | 6  | 2 | NOT NAMED | 22.7 | 65.0 | 40  | 0   |
| 1929 | 9  | 22 | 12 | 2 | NOT NAMED | 23.7 | 65.4 | 45  | 0   |
| 1929 | 9  | 22 | 18 | 2 | NOT NAMED | 24.3 | 66.6 | 50  | 0   |
| 1929 | 9  | 23 | 0  | 2 | NOT NAMED | 24.8 | 67.7 | 55  | 0   |
| 1929 | 9  | 23 | 6  | 2 | NOT NAMED | 25.2 | 68.9 | 60  | 0   |
| 1929 | 9  | 23 | 12 | 2 | NOT NAMED | 25.7 | 70.0 | 65  | 0   |
| 1929 | 9  | 23 | 18 | 2 | NOT NAMED | 26.1 | 71.2 | 70  | 0   |
| 1929 | 9  | 24 | 0  | 2 | NOT NAMED | 26.5 | 72.3 | 75  | 0   |
| 1929 | 9  | 24 | 6  | 2 | NOT NAMED | 26.8 | 73.4 | 75  | 0   |
| 1929 | 9  | 24 | 12 | 2 | NOT NAMED | 27.0 | 74.4 | 80  | 0   |
| 1929 | 9  | 24 | 18 | 2 | NOT NAMED | 27.0 | 75.2 | 85  | 0   |
| 1929 | 9  | 25 | 0  | 2 | NOT NAMED | 26.4 | 75.5 | 90  | 0   |
| 1929 | 9  | 25 | 6  | 2 | NOT NAMED | 26.2 | 75.8 | 95  | 0   |
| 1929 | 9  | 25 | 12 | 2 | NOT NAMED | 25.9 | 76.3 | 95  | 0   |
| 1929 | 9  | 25 | 18 | 2 | NOT NAMED | 25.6 | 76.4 | 100 | 0   |
| 1929 | 9  | 26 | 0  | 2 | NOT NAMED | 25.3 | 77.0 | 105 | 0   |
| 1929 | 9  | 26 | 6  | 2 | NOT NAMED | 24.9 | 77.1 | 110 | 0   |
| 1929 | 9  | 26 | 12 | 2 | NOT NAMED | 24.8 | 77.4 | 115 | 0   |
| 1929 | 9  | 26 | 18 | 2 | NOT NAMED | 24.4 | 78.0 | 120 | 0   |
| 1929 | 9  | 27 | 0  | 2 | NOT NAMED | 24.4 | 78.2 | 120 | 936 |
| 1929 | 9  | 27 | 6  | 2 | NOT NAMED | 24.4 | 78.7 | 120 | 0   |
| 1929 | 9  | 27 | 12 | 2 | NOT NAMED | 24.6 | 79.1 | 115 | 0   |
| 1929 | 9  | 27 | 18 | 2 | NOT NAMED | 24.7 | 79.4 | 110 | 0   |
| 1929 | 9  | 28 | 0  | 2 | NOT NAMED | 24.7 | 79.6 | 105 | 0   |
| 1929 | 9  | 28 | 6  | 2 | NOT NAMED | 24.8 | 79.8 | 95  | 0   |
| 1929 | 9  | 28 | 12 | 2 | NOT NAMED | 24.9 | 80.1 | 90  | 948 |

|      |    |    |    |   |           |      |      |    |   |
|------|----|----|----|---|-----------|------|------|----|---|
| 1929 | 9  | 28 | 18 | 2 | NOT NAMED | 25.1 | 80.7 | 85 | 0 |
| 1929 | 9  | 29 | 0  | 2 | NOT NAMED | 25.4 | 81.4 | 85 | 0 |
| 1929 | 9  | 29 | 6  | 2 | NOT NAMED | 25.9 | 82.0 | 85 | 0 |
| 1929 | 9  | 29 | 12 | 2 | NOT NAMED | 26.4 | 82.7 | 90 | 0 |
| 1929 | 9  | 29 | 18 | 2 | NOT NAMED | 27.0 | 83.3 | 90 | 0 |
| 1929 | 9  | 30 | 0  | 2 | NOT NAMED | 27.8 | 83.9 | 85 | 0 |
| 1929 | 9  | 30 | 6  | 2 | NOT NAMED | 28.5 | 84.5 | 75 | 0 |
| 1929 | 9  | 30 | 12 | 2 | NOT NAMED | 29.2 | 85.0 | 65 | 0 |
| 1929 | 9  | 30 | 18 | 2 | NOT NAMED | 29.8 | 85.3 | 60 | 0 |
| 1929 | 10 | 1  | 0  | 2 | NOT NAMED | 30.3 | 85.2 | 50 | 0 |
| 1929 | 10 | 1  | 6  | 2 | NOT NAMED | 30.8 | 84.9 | 50 | 0 |
| 1929 | 10 | 1  | 12 | 2 | NOT NAMED | 31.4 | 84.2 | 45 | 0 |
| 1929 | 10 | 1  | 18 | 2 | NOT NAMED | 32.3 | 82.9 | 40 | 0 |
| 1929 | 10 | 2  | 0  | 2 | NOT NAMED | 33.5 | 81.0 | 40 | 0 |
| 1929 | 10 | 2  | 6  | 2 | NOT NAMED | 34.8 | 79.8 | 40 | 0 |
| 1929 | 10 | 2  | 12 | 2 | NOT NAMED | 36.3 | 78.5 | 35 | 0 |
| 1929 | 10 | 2  | 18 | 2 | NOT NAMED | 37.9 | 77.3 | 35 | 0 |
| 1929 | 10 | 3  | 0  | 2 | NOT NAMED | 39.6 | 76.1 | 35 | 0 |
| 1929 | 10 | 3  | 6  | 2 | NOT NAMED | 41.2 | 74.9 | 30 | 0 |
| 1929 | 10 | 3  | 12 | 2 | NOT NAMED | 42.8 | 73.7 | 30 | 0 |
| 1929 | 10 | 3  | 18 | 2 | NOT NAMED | 44.1 | 72.5 | 30 | 0 |
| 1929 | 10 | 4  | 0  | 2 | NOT NAMED | 45.3 | 71.3 | 25 | 0 |
| 1929 | 10 | 4  | 6  | 2 | NOT NAMED | 46.3 | 70.0 | 25 | 0 |
| 1929 | 10 | 4  | 12 | 2 | NOT NAMED | 47.2 | 69.1 | 25 | 0 |
| 1929 | 10 | 4  | 18 | 2 | NOT NAMED | 50.9 | 61.5 | 25 | 0 |
| 1929 | 10 | 15 | 12 | 3 | NOT NAMED | 30.8 | 39.6 | 35 | 0 |
| 1929 | 10 | 15 | 18 | 3 | NOT NAMED | 30.7 | 40.2 | 35 | 0 |
| 1929 | 10 | 16 | 0  | 3 | NOT NAMED | 30.6 | 40.8 | 40 | 0 |
| 1929 | 10 | 16 | 6  | 3 | NOT NAMED | 30.5 | 41.4 | 40 | 0 |
| 1929 | 10 | 16 | 12 | 3 | NOT NAMED | 30.4 | 42.0 | 45 | 0 |
| 1929 | 10 | 16 | 18 | 3 | NOT NAMED | 30.2 | 42.6 | 50 | 0 |
| 1929 | 10 | 17 | 0  | 3 | NOT NAMED | 30.0 | 43.1 | 50 | 0 |
| 1929 | 10 | 17 | 6  | 3 | NOT NAMED | 29.9 | 43.6 | 55 | 0 |
| 1929 | 10 | 17 | 12 | 3 | NOT NAMED | 29.7 | 44.2 | 65 | 0 |
| 1929 | 10 | 17 | 18 | 3 | NOT NAMED | 29.8 | 45.0 | 70 | 0 |
| 1929 | 10 | 18 | 0  | 3 | NOT NAMED | 31.0 | 47.0 | 70 | 0 |
| 1929 | 10 | 18 | 6  | 3 | NOT NAMED | 31.7 | 47.6 | 70 | 0 |
| 1929 | 10 | 18 | 12 | 3 | NOT NAMED | 32.0 | 48.2 | 70 | 0 |
| 1929 | 10 | 18 | 18 | 3 | NOT NAMED | 31.5 | 48.5 | 70 | 0 |
| 1929 | 10 | 19 | 0  | 3 | NOT NAMED | 30.9 | 48.9 | 70 | 0 |
| 1929 | 10 | 19 | 6  | 3 | NOT NAMED | 30.3 | 49.0 | 70 | 0 |
| 1929 | 10 | 19 | 12 | 3 | NOT NAMED | 29.7 | 48.9 | 75 | 0 |
| 1929 | 10 | 19 | 18 | 3 | NOT NAMED | 29.1 | 48.8 | 75 | 0 |
| 1929 | 10 | 20 | 0  | 3 | NOT NAMED | 28.6 | 48.6 | 75 | 0 |

|      |    |    |    |   |           |      |      |    |   |
|------|----|----|----|---|-----------|------|------|----|---|
| 1929 | 10 | 20 | 6  | 3 | NOT NAMED | 28.1 | 48.4 | 75 | 0 |
| 1929 | 10 | 20 | 12 | 3 | NOT NAMED | 27.6 | 47.9 | 80 | 0 |
| 1929 | 10 | 20 | 18 | 3 | NOT NAMED | 27.8 | 47.3 | 80 | 0 |
| 1929 | 10 | 21 | 0  | 3 | NOT NAMED | 28.9 | 46.5 | 80 | 0 |
| 1929 | 10 | 21 | 6  | 3 | NOT NAMED | 30.5 | 45.6 | 80 | 0 |
| 1929 | 10 | 21 | 12 | 3 | NOT NAMED | 32.3 | 45.2 | 80 | 0 |
| 1929 | 10 | 21 | 18 | 3 | NOT NAMED | 34.1 | 46.1 | 75 | 0 |
| 1929 | 10 | 22 | 0  | 3 | NOT NAMED | 36.0 | 47.0 | 70 | 0 |
| 1929 | 10 | 22 | 6  | 3 | NOT NAMED | 38.0 | 47.1 | 70 | 0 |
| 1929 | 10 | 22 | 12 | 3 | NOT NAMED | 40.3 | 47.4 | 65 | 0 |
| 1929 | 10 | 22 | 18 | 3 | NOT NAMED | 41.8 | 46.6 | 65 | 0 |
| 1930 | 8  | 21 | 18 | 1 | NOT NAMED | 19.6 | 51.5 | 35 | 0 |
| 1930 | 8  | 22 | 0  | 1 | NOT NAMED | 20.8 | 55.1 | 35 | 0 |
| 1930 | 8  | 22 | 6  | 1 | NOT NAMED | 21.0 | 55.8 | 35 | 0 |
| 1930 | 8  | 22 | 12 | 1 | NOT NAMED | 21.3 | 56.6 | 35 | 0 |
| 1930 | 8  | 22 | 18 | 1 | NOT NAMED | 21.5 | 57.2 | 35 | 0 |
| 1930 | 8  | 23 | 0  | 1 | NOT NAMED | 21.7 | 57.7 | 40 | 0 |
| 1930 | 8  | 23 | 6  | 1 | NOT NAMED | 21.9 | 58.0 | 40 | 0 |
| 1930 | 8  | 23 | 12 | 1 | NOT NAMED | 22.2 | 58.4 | 40 | 0 |
| 1930 | 8  | 23 | 18 | 1 | NOT NAMED | 22.4 | 58.8 | 45 | 0 |
| 1930 | 8  | 24 | 0  | 1 | NOT NAMED | 22.6 | 59.2 | 50 | 0 |
| 1930 | 8  | 24 | 6  | 1 | NOT NAMED | 22.8 | 59.5 | 50 | 0 |
| 1930 | 8  | 24 | 12 | 1 | NOT NAMED | 23.0 | 60.0 | 55 | 0 |
| 1930 | 8  | 24 | 18 | 1 | NOT NAMED | 23.3 | 60.6 | 55 | 0 |
| 1930 | 8  | 25 | 0  | 1 | NOT NAMED | 23.7 | 61.2 | 60 | 0 |
| 1930 | 8  | 25 | 6  | 1 | NOT NAMED | 24.3 | 61.8 | 65 | 0 |
| 1930 | 8  | 25 | 12 | 1 | NOT NAMED | 25.1 | 62.4 | 70 | 0 |
| 1930 | 8  | 25 | 18 | 1 | NOT NAMED | 26.3 | 63.4 | 80 | 0 |
| 1930 | 8  | 26 | 0  | 1 | NOT NAMED | 28.1 | 64.5 | 85 | 0 |
| 1930 | 8  | 26 | 6  | 1 | NOT NAMED | 29.9 | 65.4 | 95 | 0 |
| 1930 | 8  | 26 | 12 | 1 | NOT NAMED | 31.4 | 65.8 | 95 | 0 |
| 1930 | 8  | 26 | 18 | 1 | NOT NAMED | 32.4 | 65.8 | 95 | 0 |
| 1930 | 8  | 27 | 0  | 1 | NOT NAMED | 33.2 | 65.8 | 90 | 0 |
| 1930 | 8  | 27 | 6  | 1 | NOT NAMED | 33.9 | 65.7 | 90 | 0 |
| 1930 | 8  | 27 | 12 | 1 | NOT NAMED | 34.9 | 65.3 | 85 | 0 |
| 1930 | 8  | 27 | 18 | 1 | NOT NAMED | 36.6 | 64.2 | 85 | 0 |
| 1930 | 8  | 28 | 0  | 1 | NOT NAMED | 38.5 | 62.0 | 80 | 0 |
| 1930 | 8  | 28 | 6  | 1 | NOT NAMED | 40.2 | 59.5 | 80 | 0 |
| 1930 | 8  | 28 | 12 | 1 | NOT NAMED | 41.6 | 55.0 | 80 | 0 |
| 1930 | 8  | 28 | 18 | 1 | NOT NAMED | 42.1 | 51.3 | 75 | 0 |
| 1930 | 8  | 29 | 0  | 1 | NOT NAMED | 42.5 | 47.5 | 75 | 0 |
| 1930 | 8  | 29 | 6  | 1 | NOT NAMED | 42.5 | 43.7 | 70 | 0 |
| 1930 | 8  | 29 | 12 | 1 | NOT NAMED | 42.3 | 40.0 | 70 | 0 |
| 1930 | 8  | 29 | 18 | 1 | NOT NAMED | 41.8 | 36.3 | 65 | 0 |

|      |   |    |    |   |           |      |      |     |     |
|------|---|----|----|---|-----------|------|------|-----|-----|
| 1930 | 8 | 30 | 0  | 1 | NOT NAMED | 41.1 | 32.6 | 65  | 0   |
| 1930 | 8 | 30 | 6  | 1 | NOT NAMED | 40.4 | 29.0 | 65  | 0   |
| 1930 | 8 | 30 | 12 | 1 | NOT NAMED | 39.7 | 25.5 | 60  | 0   |
| 1930 | 8 | 30 | 18 | 1 | NOT NAMED | 39.0 | 23.5 | 60  | 0   |
| 1930 | 8 | 31 | 0  | 1 | NOT NAMED | 38.5 | 21.9 | 60  | 0   |
| 1930 | 8 | 31 | 6  | 1 | NOT NAMED | 38.1 | 21.1 | 60  | 0   |
| 1930 | 8 | 31 | 12 | 1 | NOT NAMED | 37.9 | 20.6 | 60  | 0   |
| 1930 | 8 | 31 | 0  | 2 | NOT NAMED | 15.9 | 54.1 | 60  | 0   |
| 1930 | 8 | 31 | 6  | 2 | NOT NAMED | 15.8 | 54.9 | 60  | 0   |
| 1930 | 8 | 31 | 12 | 2 | NOT NAMED | 15.6 | 55.8 | 65  | 0   |
| 1930 | 8 | 31 | 18 | 2 | NOT NAMED | 15.5 | 56.8 | 65  | 0   |
| 1930 | 9 | 1  | 0  | 2 | NOT NAMED | 15.5 | 57.9 | 70  | 0   |
| 1930 | 9 | 1  | 6  | 2 | NOT NAMED | 15.5 | 59.1 | 75  | 0   |
| 1930 | 9 | 1  | 12 | 2 | NOT NAMED | 15.6 | 60.3 | 80  | 0   |
| 1930 | 9 | 1  | 18 | 2 | NOT NAMED | 15.9 | 61.7 | 85  | 0   |
| 1930 | 9 | 2  | 0  | 2 | NOT NAMED | 16.3 | 63.2 | 90  | 0   |
| 1930 | 9 | 2  | 6  | 2 | NOT NAMED | 16.9 | 64.8 | 95  | 0   |
| 1930 | 9 | 2  | 12 | 2 | NOT NAMED | 17.3 | 66.1 | 100 | 0   |
| 1930 | 9 | 2  | 18 | 2 | NOT NAMED | 17.5 | 66.9 | 105 | 0   |
| 1930 | 9 | 3  | 0  | 2 | NOT NAMED | 17.6 | 67.4 | 110 | 0   |
| 1930 | 9 | 3  | 6  | 2 | NOT NAMED | 17.7 | 67.8 | 115 | 0   |
| 1930 | 9 | 3  | 12 | 2 | NOT NAMED | 18.0 | 68.7 | 120 | 0   |
| 1930 | 9 | 3  | 18 | 2 | NOT NAMED | 18.4 | 70.0 | 130 | 933 |
| 1930 | 9 | 4  | 0  | 2 | NOT NAMED | 18.8 | 71.3 | 60  | 0   |
| 1930 | 9 | 4  | 6  | 2 | NOT NAMED | 19.2 | 72.5 | 60  | 0   |
| 1930 | 9 | 4  | 12 | 2 | NOT NAMED | 19.6 | 73.8 | 55  | 0   |
| 1930 | 9 | 4  | 18 | 2 | NOT NAMED | 20.0 | 75.0 | 50  | 0   |
| 1930 | 9 | 5  | 0  | 2 | NOT NAMED | 20.5 | 76.3 | 45  | 0   |
| 1930 | 9 | 5  | 6  | 2 | NOT NAMED | 20.9 | 77.5 | 45  | 0   |
| 1930 | 9 | 5  | 12 | 2 | NOT NAMED | 21.3 | 78.7 | 40  | 0   |
| 1930 | 9 | 5  | 18 | 2 | NOT NAMED | 21.7 | 79.9 | 40  | 0   |
| 1930 | 9 | 6  | 0  | 2 | NOT NAMED | 22.1 | 81.2 | 35  | 0   |
| 1930 | 9 | 6  | 6  | 2 | NOT NAMED | 22.5 | 82.4 | 35  | 0   |
| 1930 | 9 | 6  | 12 | 2 | NOT NAMED | 22.9 | 83.6 | 35  | 0   |
| 1930 | 9 | 6  | 18 | 2 | NOT NAMED | 23.3 | 84.1 | 35  | 0   |
| 1930 | 9 | 7  | 0  | 2 | NOT NAMED | 23.8 | 84.2 | 35  | 0   |
| 1930 | 9 | 7  | 6  | 2 | NOT NAMED | 24.2 | 84.8 | 35  | 0   |
| 1930 | 9 | 7  | 12 | 2 | NOT NAMED | 24.7 | 84.9 | 35  | 0   |
| 1930 | 9 | 7  | 18 | 2 | NOT NAMED | 25.2 | 84.8 | 35  | 0   |
| 1930 | 9 | 8  | 0  | 2 | NOT NAMED | 25.7 | 84.7 | 35  | 0   |
| 1930 | 9 | 8  | 6  | 2 | NOT NAMED | 26.2 | 84.5 | 35  | 0   |
| 1930 | 9 | 8  | 12 | 2 | NOT NAMED | 26.7 | 84.2 | 35  | 0   |
| 1930 | 9 | 8  | 18 | 2 | NOT NAMED | 27.2 | 83.8 | 35  | 0   |
| 1930 | 9 | 9  | 0  | 2 | NOT NAMED | 27.6 | 83.3 | 35  | 0   |

|      |   |    |    |             |      |      |    |   |
|------|---|----|----|-------------|------|------|----|---|
| 1930 | 9 | 9  | 6  | 2 NOT NAMED | 28.0 | 82.8 | 35 | 0 |
| 1930 | 9 | 9  | 12 | 2 NOT NAMED | 28.4 | 82.4 | 35 | 0 |
| 1930 | 9 | 9  | 18 | 2 NOT NAMED | 28.7 | 82.0 | 35 | 0 |
| 1930 | 9 | 10 | 0  | 2 NOT NAMED | 29.0 | 81.6 | 35 | 0 |
| 1930 | 9 | 10 | 6  | 2 NOT NAMED | 29.2 | 81.2 | 35 | 0 |
| 1930 | 9 | 10 | 12 | 2 NOT NAMED | 29.5 | 80.8 | 35 | 0 |
| 1930 | 9 | 10 | 18 | 2 NOT NAMED | 29.8 | 80.4 | 40 | 0 |
| 1930 | 9 | 11 | 0  | 2 NOT NAMED | 30.2 | 79.9 | 40 | 0 |
| 1930 | 9 | 11 | 6  | 2 NOT NAMED | 30.6 | 79.5 | 45 | 0 |
| 1930 | 9 | 11 | 12 | 2 NOT NAMED | 31.0 | 79.0 | 45 | 0 |
| 1930 | 9 | 11 | 18 | 2 NOT NAMED | 31.5 | 78.4 | 50 | 0 |
| 1930 | 9 | 12 | 0  | 2 NOT NAMED | 32.1 | 77.8 | 55 | 0 |
| 1930 | 9 | 12 | 6  | 2 NOT NAMED | 32.7 | 77.0 | 65 | 0 |
| 1930 | 9 | 12 | 12 | 2 NOT NAMED | 33.4 | 76.2 | 65 | 0 |
| 1930 | 9 | 12 | 18 | 2 NOT NAMED | 34.3 | 75.3 | 70 | 0 |
| 1930 | 9 | 13 | 0  | 2 NOT NAMED | 35.3 | 74.0 | 70 | 0 |
| 1930 | 9 | 13 | 6  | 2 NOT NAMED | 36.2 | 72.8 | 75 | 0 |
| 1930 | 9 | 13 | 12 | 2 NOT NAMED | 36.7 | 71.7 | 80 | 0 |
| 1930 | 9 | 13 | 18 | 2 NOT NAMED | 37.0 | 69.6 | 80 | 0 |
| 1930 | 9 | 14 | 0  | 2 NOT NAMED | 37.0 | 67.5 | 85 | 0 |
| 1930 | 9 | 14 | 6  | 2 NOT NAMED | 37.0 | 65.2 | 85 | 0 |
| 1930 | 9 | 14 | 12 | 2 NOT NAMED | 37.1 | 63.0 | 85 | 0 |
| 1930 | 9 | 14 | 18 | 2 NOT NAMED | 37.2 | 60.8 | 85 | 0 |
| 1930 | 9 | 15 | 0  | 2 NOT NAMED | 37.3 | 58.5 | 80 | 0 |
| 1930 | 9 | 15 | 6  | 2 NOT NAMED | 37.3 | 56.3 | 80 | 0 |
| 1930 | 9 | 15 | 12 | 2 NOT NAMED | 37.4 | 54.0 | 75 | 0 |
| 1930 | 9 | 15 | 18 | 2 NOT NAMED | 37.4 | 51.8 | 70 | 0 |
| 1930 | 9 | 16 | 0  | 2 NOT NAMED | 37.3 | 49.5 | 60 | 0 |
| 1930 | 9 | 16 | 6  | 2 NOT NAMED | 37.2 | 47.3 | 60 | 0 |
| 1930 | 9 | 16 | 12 | 2 NOT NAMED | 37.0 | 45.1 | 55 | 0 |
| 1930 | 9 | 16 | 18 | 2 NOT NAMED | 36.8 | 43.3 | 50 | 0 |
| 1930 | 9 | 17 | 0  | 2 NOT NAMED | 36.7 | 42.0 | 45 | 0 |
| 1930 | 9 | 17 | 6  | 2 NOT NAMED | 36.6 | 41.1 | 40 | 0 |
| 1930 | 9 | 17 | 12 | 2 NOT NAMED | 36.3 | 40.0 | 35 | 0 |
| 1930 | 9 | 17 | 18 | 2 NOT NAMED | 35.6 | 37.0 | 30 | 0 |
| 1931 | 6 | 25 | 0  | 1 NOT NAMED | 21.0 | 84.6 | 35 | 0 |
| 1931 | 6 | 25 | 6  | 1 NOT NAMED | 21.6 | 85.8 | 35 | 0 |
| 1931 | 6 | 25 | 12 | 1 NOT NAMED | 22.2 | 86.9 | 40 | 0 |
| 1931 | 6 | 25 | 18 | 1 NOT NAMED | 22.7 | 88.0 | 40 | 0 |
| 1931 | 6 | 26 | 0  | 1 NOT NAMED | 23.2 | 88.9 | 40 | 0 |
| 1931 | 6 | 26 | 6  | 1 NOT NAMED | 23.5 | 89.5 | 40 | 0 |
| 1931 | 6 | 26 | 12 | 1 NOT NAMED | 23.9 | 90.3 | 40 | 0 |
| 1931 | 6 | 26 | 18 | 1 NOT NAMED | 24.4 | 91.4 | 40 | 0 |
| 1931 | 6 | 27 | 0  | 1 NOT NAMED | 24.8 | 92.6 | 35 | 0 |



|      |      |    |             |      |      |    |   |
|------|------|----|-------------|------|------|----|---|
| 1931 | 6 27 | 6  | 1 NOT NAMED | 25.3 | 93.8 | 35 | 0 |
| 1931 | 6 27 | 12 | 1 NOT NAMED | 25.7 | 94.9 | 35 | 0 |
| 1931 | 6 27 | 18 | 1 NOT NAMED | 26.2 | 96.0 | 35 | 0 |
| 1931 | 6 28 | 0  | 1 NOT NAMED | 26.7 | 96.7 | 35 | 0 |
| 1931 | 6 28 | 6  | 1 NOT NAMED | 27.0 | 97.2 | 35 | 0 |
| 1931 | 6 28 | 12 | 1 NOT NAMED | 27.4 | 97.7 | 35 | 0 |
| 1931 | 6 28 | 18 | 1 NOT NAMED | 27.8 | 98.2 | 30 | 0 |
| 1931 | 7 11 | 6  | 2 NOT NAMED | 16.3 | 82.0 | 35 | 0 |
| 1931 | 7 11 | 12 | 2 NOT NAMED | 16.7 | 83.8 | 35 | 0 |
| 1931 | 7 11 | 18 | 2 NOT NAMED | 17.0 | 84.8 | 35 | 0 |
| 1931 | 7 12 | 0  | 2 NOT NAMED | 17.4 | 85.8 | 40 | 0 |
| 1931 | 7 12 | 6  | 2 NOT NAMED | 17.8 | 86.8 | 40 | 0 |
| 1931 | 7 12 | 12 | 2 NOT NAMED | 18.2 | 87.7 | 40 | 0 |
| 1931 | 7 12 | 18 | 2 NOT NAMED | 18.6 | 88.2 | 35 | 0 |
| 1931 | 7 13 | 0  | 2 NOT NAMED | 19.1 | 88.7 | 35 | 0 |
| 1931 | 7 13 | 6  | 2 NOT NAMED | 19.8 | 89.2 | 35 | 0 |
| 1931 | 7 13 | 12 | 2 NOT NAMED | 20.6 | 89.7 | 35 | 0 |
| 1931 | 7 13 | 18 | 2 NOT NAMED | 21.4 | 90.1 | 35 | 0 |
| 1931 | 7 14 | 0  | 2 NOT NAMED | 22.4 | 90.4 | 40 | 0 |
| 1931 | 7 14 | 6  | 2 NOT NAMED | 23.6 | 90.5 | 45 | 0 |
| 1931 | 7 14 | 12 | 2 NOT NAMED | 24.8 | 90.6 | 50 | 0 |
| 1931 | 7 14 | 18 | 2 NOT NAMED | 26.0 | 90.7 | 50 | 0 |
| 1931 | 7 15 | 0  | 2 NOT NAMED | 27.1 | 90.8 | 50 | 0 |
| 1931 | 7 15 | 6  | 2 NOT NAMED | 28.1 | 90.9 | 50 | 0 |
| 1931 | 7 15 | 12 | 2 NOT NAMED | 29.0 | 91.1 | 45 | 0 |
| 1931 | 7 15 | 18 | 2 NOT NAMED | 29.8 | 91.3 | 40 | 0 |
| 1931 | 7 16 | 0  | 2 NOT NAMED | 30.6 | 91.6 | 35 | 0 |
| 1931 | 7 16 | 6  | 2 NOT NAMED | 31.5 | 92.1 | 30 | 0 |
| 1931 | 7 16 | 12 | 2 NOT NAMED | 32.5 | 92.6 | 25 | 0 |
| 1931 | 7 16 | 18 | 2 NOT NAMED | 33.3 | 93.1 | 25 | 0 |
| 1931 | 7 17 | 0  | 2 NOT NAMED | 34.2 | 93.6 | 25 | 0 |
| 1931 | 7 17 | 6  | 2 NOT NAMED | 35.3 | 94.6 | 20 | 0 |
| 1931 | 7 17 | 12 | 2 NOT NAMED | 36.3 | 95.6 | 20 | 0 |
| 1931 | 7 17 | 18 | 2 NOT NAMED | 37.3 | 96.7 | 20 | 0 |
| 1931 | 8 10 | 18 | 3 NOT NAMED | 14.3 | 58.5 | 35 | 0 |
| 1931 | 8 11 | 0  | 3 NOT NAMED | 14.3 | 62.8 | 40 | 0 |
| 1931 | 8 11 | 6  | 3 NOT NAMED | 14.4 | 64.5 | 40 | 0 |
| 1931 | 8 11 | 12 | 3 NOT NAMED | 14.7 | 66.3 | 40 | 0 |
| 1931 | 8 11 | 18 | 3 NOT NAMED | 14.9 | 67.0 | 40 | 0 |
| 1931 | 8 12 | 0  | 3 NOT NAMED | 15.2 | 67.8 | 45 | 0 |
| 1931 | 8 12 | 6  | 3 NOT NAMED | 15.4 | 68.8 | 45 | 0 |
| 1931 | 8 12 | 12 | 3 NOT NAMED | 15.5 | 69.9 | 45 | 0 |
| 1931 | 8 12 | 18 | 3 NOT NAMED | 15.4 | 71.2 | 50 | 0 |
| 1931 | 8 13 | 0  | 3 NOT NAMED | 15.4 | 72.6 | 50 | 0 |

|      |      |    |             |      |      |    |   |
|------|------|----|-------------|------|------|----|---|
| 1931 | 8 13 | 6  | 3 NOT NAMED | 15.5 | 74.3 | 50 | 0 |
| 1931 | 8 13 | 12 | 3 NOT NAMED | 15.6 | 76.0 | 50 | 0 |
| 1931 | 8 13 | 18 | 3 NOT NAMED | 15.6 | 77.0 | 50 | 0 |
| 1931 | 8 14 | 0  | 3 NOT NAMED | 15.6 | 78.0 | 50 | 0 |
| 1931 | 8 14 | 6  | 3 NOT NAMED | 15.6 | 79.4 | 50 | 0 |
| 1931 | 8 14 | 12 | 3 NOT NAMED | 15.6 | 80.8 | 50 | 0 |
| 1931 | 8 14 | 18 | 3 NOT NAMED | 15.6 | 81.8 | 50 | 0 |
| 1931 | 8 15 | 0  | 3 NOT NAMED | 15.7 | 82.8 | 50 | 0 |
| 1931 | 8 15 | 6  | 3 NOT NAMED | 16.0 | 84.5 | 45 | 0 |
| 1931 | 8 15 | 12 | 3 NOT NAMED | 16.4 | 86.0 | 45 | 0 |
| 1931 | 8 15 | 18 | 3 NOT NAMED | 16.6 | 86.8 | 45 | 0 |
| 1931 | 8 16 | 0  | 3 NOT NAMED | 16.8 | 87.5 | 40 | 0 |
| 1931 | 8 16 | 6  | 3 NOT NAMED | 17.0 | 88.2 | 40 | 0 |
| 1931 | 8 16 | 12 | 3 NOT NAMED | 17.2 | 88.8 | 35 | 0 |
| 1931 | 8 16 | 18 | 3 NOT NAMED | 17.5 | 89.5 | 35 | 0 |
| 1931 | 8 17 | 0  | 3 NOT NAMED | 17.9 | 90.2 | 35 | 0 |
| 1931 | 8 17 | 6  | 3 NOT NAMED | 18.4 | 91.3 | 40 | 0 |
| 1931 | 8 17 | 12 | 3 NOT NAMED | 18.9 | 92.6 | 40 | 0 |
| 1931 | 8 17 | 18 | 3 NOT NAMED | 19.2 | 93.7 | 40 | 0 |
| 1931 | 8 18 | 0  | 3 NOT NAMED | 19.4 | 94.6 | 40 | 0 |
| 1931 | 8 18 | 6  | 3 NOT NAMED | 19.5 | 95.4 | 40 | 0 |
| 1931 | 8 18 | 12 | 3 NOT NAMED | 19.6 | 96.3 | 35 | 0 |
| 1931 | 8 18 | 18 | 3 NOT NAMED | 19.7 | 97.2 | 25 | 0 |
| 1931 | 8 16 | 6  | 4 NOT NAMED | 13.2 | 58.0 | 35 | 0 |
| 1931 | 8 16 | 12 | 4 NOT NAMED | 13.7 | 59.5 | 35 | 0 |
| 1931 | 8 16 | 18 | 4 NOT NAMED | 14.4 | 60.7 | 35 | 0 |
| 1931 | 8 17 | 0  | 4 NOT NAMED | 15.2 | 62.0 | 35 | 0 |
| 1931 | 8 17 | 6  | 4 NOT NAMED | 16.2 | 63.6 | 35 | 0 |
| 1931 | 8 17 | 12 | 4 NOT NAMED | 17.2 | 65.0 | 35 | 0 |
| 1931 | 8 17 | 18 | 4 NOT NAMED | 17.9 | 65.9 | 35 | 0 |
| 1931 | 8 18 | 0  | 4 NOT NAMED | 18.6 | 66.7 | 35 | 0 |
| 1931 | 8 18 | 6  | 4 NOT NAMED | 19.3 | 67.4 | 35 | 0 |
| 1931 | 8 18 | 12 | 4 NOT NAMED | 20.1 | 68.1 | 35 | 0 |
| 1931 | 8 18 | 18 | 4 NOT NAMED | 21.2 | 68.9 | 35 | 0 |
| 1931 | 8 19 | 0  | 4 NOT NAMED | 22.2 | 69.6 | 35 | 0 |
| 1931 | 8 19 | 6  | 4 NOT NAMED | 22.7 | 70.0 | 35 | 0 |
| 1931 | 8 19 | 12 | 4 NOT NAMED | 23.2 | 70.2 | 35 | 0 |
| 1931 | 8 19 | 18 | 4 NOT NAMED | 23.5 | 70.3 | 35 | 0 |
| 1931 | 8 20 | 0  | 4 NOT NAMED | 24.0 | 70.5 | 35 | 0 |
| 1931 | 8 20 | 6  | 4 NOT NAMED | 24.9 | 70.7 | 35 | 0 |
| 1931 | 8 20 | 12 | 4 NOT NAMED | 25.8 | 70.8 | 35 | 0 |
| 1931 | 8 20 | 18 | 4 NOT NAMED | 26.6 | 70.8 | 35 | 0 |
| 1931 | 8 21 | 0  | 4 NOT NAMED | 27.4 | 70.7 | 35 | 0 |
| 1931 | 8 21 | 6  | 4 NOT NAMED | 28.3 | 70.1 | 30 | 0 |

|      |   |    |    |             |      |      |     |     |
|------|---|----|----|-------------|------|------|-----|-----|
| 1931 | 9 | 5  | 18 | 5 NOT NAMED | 12.5 | 55.5 | 35  | 0   |
| 1931 | 9 | 6  | 0  | 5 NOT NAMED | 12.6 | 59.3 | 35  | 0   |
| 1931 | 9 | 6  | 6  | 5 NOT NAMED | 12.7 | 61.0 | 35  | 0   |
| 1931 | 9 | 6  | 12 | 5 NOT NAMED | 12.8 | 62.8 | 35  | 0   |
| 1931 | 9 | 6  | 18 | 5 NOT NAMED | 13.0 | 64.1 | 35  | 0   |
| 1931 | 9 | 7  | 0  | 5 NOT NAMED | 13.3 | 65.2 | 35  | 0   |
| 1931 | 9 | 7  | 6  | 5 NOT NAMED | 13.7 | 66.5 | 40  | 0   |
| 1931 | 9 | 7  | 12 | 5 NOT NAMED | 14.2 | 67.9 | 40  | 0   |
| 1931 | 9 | 7  | 18 | 5 NOT NAMED | 14.8 | 69.3 | 40  | 0   |
| 1931 | 9 | 8  | 0  | 5 NOT NAMED | 15.3 | 70.6 | 40  | 0   |
| 1931 | 9 | 8  | 6  | 5 NOT NAMED | 15.7 | 71.5 | 45  | 0   |
| 1931 | 9 | 8  | 12 | 5 NOT NAMED | 16.0 | 72.4 | 45  | 0   |
| 1931 | 9 | 8  | 18 | 5 NOT NAMED | 16.4 | 74.0 | 50  | 0   |
| 1931 | 9 | 9  | 0  | 5 NOT NAMED | 16.7 | 75.8 | 50  | 0   |
| 1931 | 9 | 9  | 6  | 5 NOT NAMED | 16.8 | 77.7 | 55  | 0   |
| 1931 | 9 | 9  | 12 | 5 NOT NAMED | 16.8 | 79.5 | 55  | 0   |
| 1931 | 9 | 9  | 18 | 5 NOT NAMED | 16.9 | 81.2 | 60  | 0   |
| 1931 | 9 | 10 | 0  | 5 NOT NAMED | 17.0 | 82.9 | 60  | 0   |
| 1931 | 9 | 10 | 6  | 5 NOT NAMED | 17.1 | 84.5 | 65  | 0   |
| 1931 | 9 | 10 | 12 | 5 NOT NAMED | 17.3 | 86.1 | 85  | 0   |
| 1931 | 9 | 10 | 18 | 5 NOT NAMED | 17.6 | 87.9 | 110 | 0   |
| 1931 | 9 | 11 | 0  | 5 NOT NAMED | 18.0 | 89.5 | 60  | 0   |
| 1931 | 9 | 11 | 6  | 5 NOT NAMED | 18.5 | 90.8 | 55  | 0   |
| 1931 | 9 | 11 | 12 | 5 NOT NAMED | 19.1 | 92.1 | 50  | 0   |
| 1931 | 9 | 11 | 18 | 5 NOT NAMED | 19.7 | 93.4 | 50  | 0   |
| 1931 | 9 | 12 | 0  | 5 NOT NAMED | 20.3 | 94.7 | 50  | 0   |
| 1931 | 9 | 12 | 6  | 5 NOT NAMED | 20.9 | 96.2 | 55  | 0   |
| 1931 | 9 | 12 | 12 | 5 NOT NAMED | 21.5 | 97.9 | 55  | 0   |
| 1931 | 9 | 12 | 18 | 5 NOT NAMED | 22.1 | 99.5 | 35  | 0   |
| 1931 | 9 | 8  | 18 | 6 NOT NAMED | 17.2 | 52.8 | 40  | 0   |
| 1931 | 9 | 9  | 0  | 6 NOT NAMED | 17.3 | 53.8 | 45  | 0   |
| 1931 | 9 | 9  | 6  | 6 NOT NAMED | 17.4 | 55.4 | 45  | 0   |
| 1931 | 9 | 9  | 12 | 6 NOT NAMED | 17.5 | 57.0 | 50  | 0   |
| 1931 | 9 | 9  | 18 | 6 NOT NAMED | 17.6 | 58.6 | 55  | 0   |
| 1931 | 9 | 10 | 0  | 6 NOT NAMED | 17.7 | 60.2 | 55  | 0   |
| 1931 | 9 | 10 | 6  | 6 NOT NAMED | 17.9 | 61.6 | 60  | 0   |
| 1931 | 9 | 10 | 12 | 6 NOT NAMED | 18.1 | 62.8 | 65  | 0   |
| 1931 | 9 | 10 | 18 | 6 NOT NAMED | 18.2 | 63.9 | 85  | 988 |
| 1931 | 9 | 11 | 0  | 6 NOT NAMED | 18.3 | 65.1 | 80  | 0   |
| 1931 | 9 | 11 | 6  | 6 NOT NAMED | 18.4 | 66.4 | 70  | 0   |
| 1931 | 9 | 11 | 12 | 6 NOT NAMED | 18.5 | 67.9 | 60  | 0   |
| 1931 | 9 | 11 | 18 | 6 NOT NAMED | 18.4 | 69.6 | 60  | 0   |
| 1931 | 9 | 12 | 0  | 6 NOT NAMED | 18.3 | 71.3 | 55  | 0   |
| 1931 | 9 | 12 | 6  | 6 NOT NAMED | 18.2 | 72.8 | 55  | 0   |

|      |       |    |             |      |      |    |     |
|------|-------|----|-------------|------|------|----|-----|
| 1931 | 9 12  | 12 | 6 NOT NAMED | 18.1 | 74.3 | 55 | 0   |
| 1931 | 9 12  | 18 | 6 NOT NAMED | 18.1 | 76.1 | 55 | 0   |
| 1931 | 9 13  | 0  | 6 NOT NAMED | 18.1 | 78.0 | 55 | 0   |
| 1931 | 9 13  | 6  | 6 NOT NAMED | 18.2 | 79.8 | 60 | 0   |
| 1931 | 9 13  | 12 | 6 NOT NAMED | 18.3 | 81.3 | 60 | 0   |
| 1931 | 9 13  | 18 | 6 NOT NAMED | 18.3 | 82.6 | 60 | 0   |
| 1931 | 9 14  | 0  | 6 NOT NAMED | 18.3 | 83.8 | 60 | 0   |
| 1931 | 9 14  | 6  | 6 NOT NAMED | 18.3 | 85.1 | 60 | 0   |
| 1931 | 9 14  | 12 | 6 NOT NAMED | 18.4 | 86.3 | 60 | 0   |
| 1931 | 9 14  | 18 | 6 NOT NAMED | 18.5 | 87.5 | 60 | 0   |
| 1931 | 9 15  | 0  | 6 NOT NAMED | 18.7 | 88.6 | 50 | 0   |
| 1931 | 9 15  | 6  | 6 NOT NAMED | 19.0 | 90.4 | 55 | 0   |
| 1931 | 9 15  | 12 | 6 NOT NAMED | 19.3 | 91.4 | 65 | 0   |
| 1931 | 9 15  | 18 | 6 NOT NAMED | 19.4 | 92.8 | 75 | 0   |
| 1931 | 9 16  | 0  | 6 NOT NAMED | 19.3 | 93.7 | 75 | 0   |
| 1931 | 9 16  | 6  | 6 NOT NAMED | 19.1 | 94.9 | 75 | 0   |
| 1931 | 9 16  | 12 | 6 NOT NAMED | 18.8 | 96.2 | 70 | 997 |
| 1931 | 9 16  | 18 | 6 NOT NAMED | 18.5 | 97.4 | 35 | 0   |
| 1931 | 9 25  | 6  | 7 NOT NAMED | 22.3 | 53.0 | 35 | 0   |
| 1931 | 9 25  | 12 | 7 NOT NAMED | 25.0 | 54.5 | 35 | 0   |
| 1931 | 9 25  | 18 | 7 NOT NAMED | 26.3 | 54.8 | 35 | 0   |
| 1931 | 9 26  | 0  | 7 NOT NAMED | 27.4 | 54.7 | 35 | 0   |
| 1931 | 9 26  | 6  | 7 NOT NAMED | 28.4 | 54.3 | 35 | 0   |
| 1931 | 9 26  | 12 | 7 NOT NAMED | 29.3 | 53.9 | 35 | 0   |
| 1931 | 9 26  | 18 | 7 NOT NAMED | 30.1 | 53.5 | 35 | 0   |
| 1931 | 9 27  | 0  | 7 NOT NAMED | 30.9 | 53.0 | 35 | 0   |
| 1931 | 9 27  | 6  | 7 NOT NAMED | 31.6 | 52.5 | 35 | 0   |
| 1931 | 9 27  | 12 | 7 NOT NAMED | 32.4 | 52.0 | 35 | 0   |
| 1931 | 9 27  | 18 | 7 NOT NAMED | 33.5 | 51.0 | 30 | 0   |
| 1931 | 10 18 | 18 | 8 NOT NAMED | 17.0 | 86.0 | 35 | 0   |
| 1931 | 10 19 | 0  | 8 NOT NAMED | 19.3 | 83.1 | 40 | 0   |
| 1931 | 10 19 | 6  | 8 NOT NAMED | 20.2 | 81.7 | 40 | 0   |
| 1931 | 10 19 | 12 | 8 NOT NAMED | 21.0 | 80.4 | 40 | 0   |
| 1931 | 10 19 | 18 | 8 NOT NAMED | 21.9 | 79.0 | 35 | 0   |
| 1931 | 10 20 | 0  | 8 NOT NAMED | 22.8 | 77.5 | 35 | 0   |
| 1931 | 10 20 | 6  | 8 NOT NAMED | 23.4 | 76.3 | 35 | 0   |
| 1931 | 10 20 | 12 | 8 NOT NAMED | 24.0 | 74.9 | 35 | 0   |
| 1931 | 10 20 | 18 | 8 NOT NAMED | 25.2 | 72.4 | 35 | 0   |
| 1931 | 10 21 | 0  | 8 NOT NAMED | 26.5 | 69.7 | 40 | 0   |
| 1931 | 10 21 | 6  | 8 NOT NAMED | 27.6 | 67.3 | 40 | 0   |
| 1931 | 10 21 | 12 | 8 NOT NAMED | 28.7 | 64.8 | 40 | 0   |
| 1931 | 10 21 | 18 | 8 NOT NAMED | 29.7 | 62.3 | 40 | 0   |
| 1931 | 10 22 | 0  | 8 NOT NAMED | 30.4 | 59.4 | 40 | 0   |
| 1931 | 10 22 | 6  | 8 NOT NAMED | 30.8 | 56.3 | 35 | 0   |

|      |    |    |    |   |           |      |      |    |   |
|------|----|----|----|---|-----------|------|------|----|---|
| 1931 | 10 | 22 | 12 | 8 | NOT NAMED | 31.2 | 53.1 | 30 | 0 |
| 1931 | 10 | 22 | 18 | 8 | NOT NAMED | 31.6 | 50.9 | 25 | 0 |
| 1931 | 11 | 22 | 6  | 9 | NOT NAMED | 19.3 | 61.6 | 35 | 0 |
| 1931 | 11 | 22 | 12 | 9 | NOT NAMED | 20.9 | 63.2 | 35 | 0 |
| 1931 | 11 | 22 | 18 | 9 | NOT NAMED | 21.9 | 64.0 | 35 | 0 |
| 1931 | 11 | 23 | 0  | 9 | NOT NAMED | 23.1 | 65.0 | 35 | 0 |
| 1931 | 11 | 23 | 6  | 9 | NOT NAMED | 24.6 | 66.1 | 35 | 0 |
| 1931 | 11 | 23 | 12 | 9 | NOT NAMED | 25.9 | 67.3 | 35 | 0 |
| 1931 | 11 | 23 | 18 | 9 | NOT NAMED | 26.6 | 68.1 | 35 | 0 |
| 1931 | 11 | 24 | 0  | 9 | NOT NAMED | 27.3 | 68.9 | 35 | 0 |
| 1931 | 11 | 24 | 6  | 9 | NOT NAMED | 28.0 | 70.2 | 40 | 0 |
| 1931 | 11 | 24 | 12 | 9 | NOT NAMED | 28.7 | 71.9 | 40 | 0 |
| 1931 | 11 | 24 | 18 | 9 | NOT NAMED | 28.9 | 72.8 | 40 | 0 |
| 1931 | 11 | 25 | 0  | 9 | NOT NAMED | 28.8 | 73.8 | 40 | 0 |
| 1931 | 11 | 25 | 6  | 9 | NOT NAMED | 28.6 | 75.0 | 40 | 0 |
| 1931 | 11 | 25 | 12 | 9 | NOT NAMED | 28.2 | 76.3 | 35 | 0 |
| 1931 | 11 | 25 | 18 | 9 | NOT NAMED | 27.0 | 78.9 | 30 | 0 |
| 1932 | 5  | 5  | 12 | 1 | NOT NAMED | 12.0 | 80.0 | 35 | 0 |
| 1932 | 5  | 5  | 18 | 1 | NOT NAMED | 12.5 | 78.6 | 35 | 0 |
| 1932 | 5  | 6  | 0  | 1 | NOT NAMED | 13.1 | 77.1 | 35 | 0 |
| 1932 | 5  | 6  | 6  | 1 | NOT NAMED | 13.9 | 75.6 | 35 | 0 |
| 1932 | 5  | 6  | 12 | 1 | NOT NAMED | 14.7 | 74.1 | 35 | 0 |
| 1932 | 5  | 6  | 18 | 1 | NOT NAMED | 16.0 | 72.5 | 35 | 0 |
| 1932 | 5  | 7  | 0  | 1 | NOT NAMED | 17.4 | 71.2 | 40 | 0 |
| 1932 | 5  | 7  | 6  | 1 | NOT NAMED | 18.5 | 70.2 | 40 | 0 |
| 1932 | 5  | 7  | 12 | 1 | NOT NAMED | 19.7 | 69.5 | 35 | 0 |
| 1932 | 5  | 7  | 18 | 1 | NOT NAMED | 21.0 | 68.8 | 35 | 0 |
| 1932 | 5  | 8  | 0  | 1 | NOT NAMED | 22.4 | 68.2 | 35 | 0 |
| 1932 | 5  | 8  | 6  | 1 | NOT NAMED | 23.7 | 67.7 | 40 | 0 |
| 1932 | 5  | 8  | 12 | 1 | NOT NAMED | 24.8 | 67.3 | 40 | 0 |
| 1932 | 5  | 8  | 18 | 1 | NOT NAMED | 25.8 | 67.1 | 40 | 0 |
| 1932 | 5  | 9  | 0  | 1 | NOT NAMED | 26.6 | 67.0 | 45 | 0 |
| 1932 | 5  | 9  | 6  | 1 | NOT NAMED | 27.4 | 67.0 | 45 | 0 |
| 1932 | 5  | 9  | 12 | 1 | NOT NAMED | 28.1 | 67.1 | 45 | 0 |
| 1932 | 5  | 9  | 18 | 1 | NOT NAMED | 28.6 | 67.2 | 40 | 0 |
| 1932 | 5  | 10 | 0  | 1 | NOT NAMED | 29.1 | 67.3 | 40 | 0 |
| 1932 | 5  | 10 | 6  | 1 | NOT NAMED | 29.6 | 67.5 | 40 | 0 |
| 1932 | 5  | 10 | 12 | 1 | NOT NAMED | 30.2 | 67.9 | 40 | 0 |
| 1932 | 5  | 10 | 18 | 1 | NOT NAMED | 30.8 | 68.6 | 35 | 0 |
| 1932 | 5  | 11 | 0  | 1 | NOT NAMED | 31.7 | 69.9 | 30 | 0 |
| 1932 | 5  | 11 | 6  | 1 | NOT NAMED | 32.0 | 70.8 | 25 | 0 |
| 1932 | 8  | 12 | 0  | 2 | NOT NAMED | 22.0 | 90.3 | 35 | 0 |
| 1932 | 8  | 12 | 6  | 2 | NOT NAMED | 23.0 | 90.8 | 40 | 0 |
| 1932 | 8  | 12 | 12 | 2 | NOT NAMED | 24.0 | 91.3 | 45 | 0 |

|      |   |    |    |   |           |      |      |     |      |
|------|---|----|----|---|-----------|------|------|-----|------|
| 1932 | 8 | 12 | 18 | 2 | NOT NAMED | 24.7 | 91.7 | 50  | 0    |
| 1932 | 8 | 13 | 0  | 2 | NOT NAMED | 25.4 | 92.1 | 55  | 0    |
| 1932 | 8 | 13 | 6  | 2 | NOT NAMED | 26.3 | 92.7 | 65  | 0    |
| 1932 | 8 | 13 | 12 | 2 | NOT NAMED | 27.2 | 93.3 | 90  | 0    |
| 1932 | 8 | 13 | 18 | 2 | NOT NAMED | 28.1 | 94.0 | 110 | 0    |
| 1932 | 8 | 14 | 0  | 2 | NOT NAMED | 28.9 | 94.7 | 125 | 942  |
| 1932 | 8 | 14 | 6  | 2 | NOT NAMED | 29.6 | 95.3 | 90  | 0    |
| 1932 | 8 | 14 | 12 | 2 | NOT NAMED | 30.3 | 96.0 | 60  | 987  |
| 1932 | 8 | 14 | 18 | 2 | NOT NAMED | 31.0 | 96.7 | 35  | 0    |
| 1932 | 8 | 15 | 0  | 2 | NOT NAMED | 31.9 | 97.5 | 25  | 1002 |
| 1932 | 8 | 15 | 6  | 2 | NOT NAMED | 32.9 | 98.4 | 25  | 0    |
| 1932 | 8 | 26 | 18 | 3 | NOT NAMED | 20.5 | 69.8 | 35  | 0    |
| 1932 | 8 | 27 | 0  | 3 | NOT NAMED | 20.8 | 70.5 | 35  | 0    |
| 1932 | 8 | 27 | 6  | 3 | NOT NAMED | 21.1 | 71.2 | 35  | 0    |
| 1932 | 8 | 27 | 12 | 3 | NOT NAMED | 21.5 | 71.8 | 35  | 0    |
| 1932 | 8 | 27 | 18 | 3 | NOT NAMED | 21.9 | 72.7 | 35  | 0    |
| 1932 | 8 | 28 | 0  | 3 | NOT NAMED | 22.3 | 73.7 | 35  | 0    |
| 1932 | 8 | 28 | 6  | 3 | NOT NAMED | 22.6 | 74.2 | 40  | 0    |
| 1932 | 8 | 28 | 12 | 3 | NOT NAMED | 22.9 | 74.8 | 40  | 0    |
| 1932 | 8 | 28 | 18 | 3 | NOT NAMED | 23.3 | 75.6 | 40  | 0    |
| 1932 | 8 | 29 | 0  | 3 | NOT NAMED | 23.6 | 76.4 | 45  | 0    |
| 1932 | 8 | 29 | 6  | 3 | NOT NAMED | 23.9 | 77.2 | 50  | 0    |
| 1932 | 8 | 29 | 12 | 3 | NOT NAMED | 24.2 | 78.0 | 50  | 0    |
| 1932 | 8 | 29 | 18 | 3 | NOT NAMED | 24.6 | 78.9 | 55  | 0    |
| 1932 | 8 | 30 | 0  | 3 | NOT NAMED | 25.0 | 79.8 | 55  | 0    |
| 1932 | 8 | 30 | 6  | 3 | NOT NAMED | 25.4 | 80.7 | 55  | 0    |
| 1932 | 8 | 30 | 12 | 3 | NOT NAMED | 25.9 | 81.5 | 50  | 0    |
| 1932 | 8 | 30 | 18 | 3 | NOT NAMED | 26.5 | 82.6 | 55  | 0    |
| 1932 | 8 | 31 | 0  | 3 | NOT NAMED | 27.2 | 83.8 | 65  | 0    |
| 1932 | 8 | 31 | 6  | 3 | NOT NAMED | 27.7 | 84.5 | 70  | 0    |
| 1932 | 8 | 31 | 12 | 3 | NOT NAMED | 28.1 | 85.1 | 70  | 0    |
| 1932 | 8 | 31 | 18 | 3 | NOT NAMED | 28.9 | 86.2 | 70  | 0    |
| 1932 | 9 | 1  | 0  | 3 | NOT NAMED | 29.7 | 87.3 | 70  | 0    |
| 1932 | 9 | 1  | 6  | 3 | NOT NAMED | 30.4 | 88.2 | 70  | 0    |
| 1932 | 9 | 1  | 12 | 3 | NOT NAMED | 31.1 | 88.8 | 60  | 0    |
| 1932 | 9 | 1  | 18 | 3 | NOT NAMED | 31.7 | 89.2 | 50  | 0    |
| 1932 | 9 | 2  | 0  | 3 | NOT NAMED | 32.3 | 89.6 | 45  | 0    |
| 1932 | 9 | 2  | 6  | 3 | NOT NAMED | 33.1 | 90.0 | 40  | 0    |
| 1932 | 9 | 2  | 12 | 3 | NOT NAMED | 34.1 | 90.1 | 35  | 0    |
| 1932 | 9 | 2  | 18 | 3 | NOT NAMED | 35.3 | 90.1 | 30  | 0    |
| 1932 | 9 | 3  | 0  | 3 | NOT NAMED | 36.6 | 90.0 | 30  | 0    |
| 1932 | 9 | 3  | 6  | 3 | NOT NAMED | 37.4 | 89.7 | 25  | 0    |
| 1932 | 9 | 3  | 12 | 3 | NOT NAMED | 38.2 | 89.4 | 25  | 0    |
| 1932 | 9 | 3  | 18 | 3 | NOT NAMED | 40.0 | 88.0 | 25  | 0    |

|      |   |    |    |   |           |      |      |     |   |
|------|---|----|----|---|-----------|------|------|-----|---|
| 1932 | 9 | 4  | 0  | 3 | NOT NAMED | 42.6 | 85.0 | 20  | 0 |
| 1932 | 9 | 4  | 6  | 3 | NOT NAMED | 43.0 | 82.0 | 20  | 0 |
| 1932 | 8 | 30 | 18 | 4 | NOT NAMED | 19.2 | 61.6 | 35  | 0 |
| 1932 | 8 | 31 | 0  | 4 | NOT NAMED | 19.9 | 63.6 | 35  | 0 |
| 1932 | 8 | 31 | 6  | 4 | NOT NAMED | 20.0 | 64.2 | 40  | 0 |
| 1932 | 8 | 31 | 12 | 4 | NOT NAMED | 20.2 | 64.7 | 40  | 0 |
| 1932 | 8 | 31 | 18 | 4 | NOT NAMED | 20.4 | 65.3 | 40  | 0 |
| 1932 | 9 | 1  | 0  | 4 | NOT NAMED | 20.6 | 66.0 | 40  | 0 |
| 1932 | 9 | 1  | 6  | 4 | NOT NAMED | 20.7 | 66.5 | 45  | 0 |
| 1932 | 9 | 1  | 12 | 4 | NOT NAMED | 20.9 | 67.1 | 45  | 0 |
| 1932 | 9 | 1  | 18 | 4 | NOT NAMED | 21.1 | 67.7 | 50  | 0 |
| 1932 | 9 | 2  | 0  | 4 | NOT NAMED | 21.3 | 68.2 | 55  | 0 |
| 1932 | 9 | 2  | 6  | 4 | NOT NAMED | 21.5 | 68.7 | 55  | 0 |
| 1932 | 9 | 2  | 12 | 4 | NOT NAMED | 21.7 | 69.2 | 60  | 0 |
| 1932 | 9 | 2  | 18 | 4 | NOT NAMED | 21.9 | 69.7 | 65  | 0 |
| 1932 | 9 | 3  | 0  | 4 | NOT NAMED | 22.0 | 70.1 | 70  | 0 |
| 1932 | 9 | 3  | 6  | 4 | NOT NAMED | 22.2 | 70.5 | 80  | 0 |
| 1932 | 9 | 3  | 12 | 4 | NOT NAMED | 22.4 | 70.9 | 85  | 0 |
| 1932 | 9 | 3  | 18 | 4 | NOT NAMED | 22.7 | 71.5 | 95  | 0 |
| 1932 | 9 | 4  | 0  | 4 | NOT NAMED | 23.0 | 72.2 | 100 | 0 |
| 1932 | 9 | 4  | 6  | 4 | NOT NAMED | 23.2 | 72.6 | 110 | 0 |
| 1932 | 9 | 4  | 12 | 4 | NOT NAMED | 23.5 | 73.2 | 115 | 0 |
| 1932 | 9 | 4  | 18 | 4 | NOT NAMED | 23.9 | 74.0 | 120 | 0 |
| 1932 | 9 | 5  | 0  | 4 | NOT NAMED | 24.3 | 74.8 | 125 | 0 |
| 1932 | 9 | 5  | 6  | 4 | NOT NAMED | 24.7 | 75.6 | 130 | 0 |
| 1932 | 9 | 5  | 12 | 4 | NOT NAMED | 25.2 | 76.4 | 135 | 0 |
| 1932 | 9 | 5  | 18 | 4 | NOT NAMED | 25.7 | 77.0 | 140 | 0 |
| 1932 | 9 | 6  | 0  | 4 | NOT NAMED | 26.3 | 77.4 | 140 | 0 |
| 1932 | 9 | 6  | 6  | 4 | NOT NAMED | 27.1 | 77.6 | 140 | 0 |
| 1932 | 9 | 6  | 12 | 4 | NOT NAMED | 27.9 | 77.4 | 140 | 0 |
| 1932 | 9 | 6  | 18 | 4 | NOT NAMED | 28.4 | 76.9 | 135 | 0 |
| 1932 | 9 | 7  | 0  | 4 | NOT NAMED | 28.9 | 76.3 | 130 | 0 |
| 1932 | 9 | 7  | 6  | 4 | NOT NAMED | 29.3 | 75.8 | 125 | 0 |
| 1932 | 9 | 7  | 12 | 4 | NOT NAMED | 29.8 | 75.3 | 125 | 0 |
| 1932 | 9 | 7  | 18 | 4 | NOT NAMED | 30.3 | 74.6 | 120 | 0 |
| 1932 | 9 | 8  | 0  | 4 | NOT NAMED | 31.2 | 73.4 | 115 | 0 |
| 1932 | 9 | 8  | 6  | 4 | NOT NAMED | 33.2 | 71.4 | 110 | 0 |
| 1932 | 9 | 8  | 12 | 4 | NOT NAMED | 35.5 | 69.6 | 105 | 0 |
| 1932 | 9 | 8  | 18 | 4 | NOT NAMED | 37.2 | 68.9 | 100 | 0 |
| 1932 | 9 | 9  | 0  | 4 | NOT NAMED | 38.6 | 68.3 | 95  | 0 |
| 1932 | 9 | 9  | 6  | 4 | NOT NAMED | 39.5 | 67.7 | 95  | 0 |
| 1932 | 9 | 9  | 12 | 4 | NOT NAMED | 40.3 | 67.0 | 90  | 0 |
| 1932 | 9 | 9  | 18 | 4 | NOT NAMED | 41.4 | 65.0 | 85  | 0 |
| 1932 | 9 | 10 | 0  | 4 | NOT NAMED | 42.4 | 62.5 | 80  | 0 |

|      |      |    |             |      |      |    |   |
|------|------|----|-------------|------|------|----|---|
| 1932 | 9 10 | 6  | 4 NOT NAMED | 42.9 | 61.0 | 75 | 0 |
| 1932 | 9 10 | 12 | 4 NOT NAMED | 43.4 | 59.6 | 70 | 0 |
| 1932 | 9 10 | 18 | 4 NOT NAMED | 43.9 | 58.3 | 70 | 0 |
| 1932 | 9 11 | 0  | 4 NOT NAMED | 44.4 | 56.9 | 65 | 0 |
| 1932 | 9 11 | 6  | 4 NOT NAMED | 45.0 | 55.5 | 65 | 0 |
| 1932 | 9 11 | 12 | 4 NOT NAMED | 45.6 | 54.2 | 60 | 0 |
| 1932 | 9 11 | 18 | 4 NOT NAMED | 46.8 | 51.9 | 60 | 0 |
| 1932 | 9 12 | 0  | 4 NOT NAMED | 48.5 | 48.8 | 60 | 0 |
| 1932 | 9 12 | 6  | 4 NOT NAMED | 50.3 | 45.8 | 55 | 0 |
| 1932 | 9 12 | 12 | 4 NOT NAMED | 52.0 | 43.0 | 55 | 0 |
| 1932 | 9 12 | 18 | 4 NOT NAMED | 53.7 | 40.7 | 55 | 0 |
| 1932 | 9 13 | 0  | 4 NOT NAMED | 55.2 | 38.7 | 50 | 0 |
| 1932 | 9 13 | 6  | 4 NOT NAMED | 56.5 | 36.8 | 50 | 0 |
| 1932 | 9 13 | 12 | 4 NOT NAMED | 57.8 | 35.0 | 50 | 0 |
| 1932 | 9 13 | 18 | 4 NOT NAMED | 60.0 | 32.0 | 50 | 0 |
| 1932 | 9 9  | 6  | 5 NOT NAMED | 19.2 | 93.3 | 35 | 0 |
| 1932 | 9 9  | 12 | 5 NOT NAMED | 20.8 | 93.2 | 35 | 0 |
| 1932 | 9 9  | 18 | 5 NOT NAMED | 21.4 | 93.2 | 35 | 0 |
| 1932 | 9 10 | 0  | 5 NOT NAMED | 21.8 | 93.1 | 35 | 0 |
| 1932 | 9 10 | 6  | 5 NOT NAMED | 22.1 | 93.1 | 35 | 0 |
| 1932 | 9 10 | 12 | 5 NOT NAMED | 22.4 | 93.0 | 35 | 0 |
| 1932 | 9 10 | 18 | 5 NOT NAMED | 22.9 | 93.0 | 35 | 0 |
| 1932 | 9 11 | 0  | 5 NOT NAMED | 23.3 | 93.0 | 35 | 0 |
| 1932 | 9 11 | 6  | 5 NOT NAMED | 23.6 | 93.0 | 35 | 0 |
| 1932 | 9 11 | 12 | 5 NOT NAMED | 23.9 | 92.9 | 35 | 0 |
| 1932 | 9 11 | 18 | 5 NOT NAMED | 24.3 | 92.8 | 35 | 0 |
| 1932 | 9 12 | 0  | 5 NOT NAMED | 24.7 | 92.7 | 35 | 0 |
| 1932 | 9 12 | 6  | 5 NOT NAMED | 24.9 | 92.6 | 35 | 0 |
| 1932 | 9 12 | 12 | 5 NOT NAMED | 25.2 | 92.5 | 35 | 0 |
| 1932 | 9 12 | 18 | 5 NOT NAMED | 25.6 | 92.3 | 35 | 0 |
| 1932 | 9 13 | 0  | 5 NOT NAMED | 26.1 | 92.0 | 35 | 0 |
| 1932 | 9 13 | 6  | 5 NOT NAMED | 26.6 | 91.6 | 35 | 0 |
| 1932 | 9 13 | 12 | 5 NOT NAMED | 27.0 | 91.0 | 40 | 0 |
| 1932 | 9 13 | 18 | 5 NOT NAMED | 27.2 | 90.6 | 40 | 0 |
| 1932 | 9 14 | 0  | 5 NOT NAMED | 27.4 | 90.2 | 40 | 0 |
| 1932 | 9 14 | 6  | 5 NOT NAMED | 27.6 | 89.9 | 40 | 0 |
| 1932 | 9 14 | 12 | 5 NOT NAMED | 27.8 | 89.2 | 45 | 0 |
| 1932 | 9 14 | 18 | 5 NOT NAMED | 28.3 | 87.2 | 45 | 0 |
| 1932 | 9 15 | 0  | 5 NOT NAMED | 29.2 | 84.8 | 45 | 0 |
| 1932 | 9 15 | 6  | 5 NOT NAMED | 30.2 | 82.5 | 45 | 0 |
| 1932 | 9 15 | 12 | 5 NOT NAMED | 31.4 | 80.2 | 40 | 0 |
| 1932 | 9 15 | 18 | 5 NOT NAMED | 32.7 | 78.3 | 35 | 0 |
| 1932 | 9 16 | 0  | 5 NOT NAMED | 34.0 | 76.7 | 35 | 0 |
| 1932 | 9 16 | 6  | 5 NOT NAMED | 35.4 | 75.2 | 35 | 0 |



|      |         |             |      |      |     |     |
|------|---------|-------------|------|------|-----|-----|
| 1932 | 9 16 12 | 5 NOT NAMED | 36.9 | 73.7 | 35  | 0   |
| 1932 | 9 16 18 | 5 NOT NAMED | 38.3 | 72.4 | 35  | 0   |
| 1932 | 9 17 0  | 5 NOT NAMED | 40.1 | 71.0 | 35  | 0   |
| 1932 | 9 17 6  | 5 NOT NAMED | 42.3 | 69.3 | 35  | 0   |
| 1932 | 9 17 12 | 5 NOT NAMED | 44.5 | 67.7 | 35  | 0   |
| 1932 | 9 17 18 | 5 NOT NAMED | 46.7 | 66.0 | 35  | 0   |
| 1932 | 9 18 6  | 6 NOT NAMED | 21.6 | 94.5 | 35  | 0   |
| 1932 | 9 18 12 | 6 NOT NAMED | 23.1 | 94.1 | 35  | 0   |
| 1932 | 9 18 18 | 6 NOT NAMED | 24.1 | 93.8 | 35  | 0   |
| 1932 | 9 19 0  | 6 NOT NAMED | 25.3 | 93.5 | 35  | 0   |
| 1932 | 9 19 6  | 6 NOT NAMED | 26.6 | 93.1 | 35  | 0   |
| 1932 | 9 19 12 | 6 NOT NAMED | 28.0 | 92.7 | 35  | 0   |
| 1932 | 9 19 18 | 6 NOT NAMED | 29.4 | 92.1 | 35  | 0   |
| 1932 | 9 20 0  | 6 NOT NAMED | 31.0 | 91.5 | 35  | 0   |
| 1932 | 9 20 6  | 6 NOT NAMED | 33.9 | 90.2 | 30  | 0   |
| 1932 | 9 20 12 | 6 NOT NAMED | 36.6 | 88.6 | 30  | 0   |
| 1932 | 9 20 18 | 6 NOT NAMED | 37.6 | 87.7 | 25  | 0   |
| 1932 | 9 21 0  | 6 NOT NAMED | 38.3 | 86.7 | 20  | 0   |
| 1932 | 9 21 6  | 6 NOT NAMED | 38.9 | 85.6 | 20  | 0   |
| 1932 | 9 21 12 | 6 NOT NAMED | 39.5 | 84.4 | 15  | 0   |
| 1932 | 9 21 18 | 6 NOT NAMED | 39.8 | 79.4 | 15  | 0   |
| 1932 | 9 25 6  | 7 NOT NAMED | 16.3 | 56.3 | 50  | 0   |
| 1932 | 9 25 12 | 7 NOT NAMED | 16.9 | 58.0 | 65  | 0   |
| 1932 | 9 25 18 | 7 NOT NAMED | 17.2 | 59.0 | 80  | 0   |
| 1932 | 9 26 0  | 7 NOT NAMED | 17.4 | 60.0 | 90  | 0   |
| 1932 | 9 26 6  | 7 NOT NAMED | 17.7 | 61.0 | 100 | 948 |
| 1932 | 9 26 12 | 7 NOT NAMED | 18.0 | 62.0 | 105 | 0   |
| 1932 | 9 26 18 | 7 NOT NAMED | 18.2 | 63.2 | 100 | 0   |
| 1932 | 9 27 0  | 7 NOT NAMED | 18.2 | 64.7 | 95  | 0   |
| 1932 | 9 27 6  | 7 NOT NAMED | 18.2 | 66.2 | 90  | 0   |
| 1932 | 9 27 12 | 7 NOT NAMED | 18.2 | 67.6 | 85  | 0   |
| 1932 | 9 27 18 | 7 NOT NAMED | 18.1 | 68.9 | 80  | 0   |
| 1932 | 9 28 0  | 7 NOT NAMED | 18.0 | 70.2 | 70  | 0   |
| 1932 | 9 28 6  | 7 NOT NAMED | 18.0 | 71.9 | 60  | 0   |
| 1932 | 9 28 12 | 7 NOT NAMED | 18.0 | 73.5 | 55  | 0   |
| 1932 | 9 28 18 | 7 NOT NAMED | 17.9 | 74.4 | 50  | 0   |
| 1932 | 9 29 0  | 7 NOT NAMED | 17.9 | 75.2 | 45  | 0   |
| 1932 | 9 29 6  | 7 NOT NAMED | 17.9 | 76.5 | 40  | 0   |
| 1932 | 9 29 12 | 7 NOT NAMED | 17.9 | 77.7 | 40  | 0   |
| 1932 | 9 29 18 | 7 NOT NAMED | 17.9 | 78.8 | 40  | 0   |
| 1932 | 9 30 0  | 7 NOT NAMED | 18.0 | 79.9 | 40  | 0   |
| 1932 | 9 30 6  | 7 NOT NAMED | 18.0 | 81.1 | 40  | 0   |
| 1932 | 9 30 12 | 7 NOT NAMED | 18.0 | 82.3 | 40  | 0   |
| 1932 | 9 30 18 | 7 NOT NAMED | 17.9 | 83.6 | 40  | 0   |

|         |    |    |             |      |      |    |   |
|---------|----|----|-------------|------|------|----|---|
| 1932 10 | 1  | 0  | 7 NOT NAMED | 17.9 | 84.9 | 40 | 0 |
| 1932 10 | 1  | 6  | 7 NOT NAMED | 17.9 | 85.8 | 40 | 0 |
| 1932 10 | 1  | 12 | 7 NOT NAMED | 17.8 | 86.7 | 40 | 0 |
| 1932 10 | 1  | 18 | 7 NOT NAMED | 17.7 | 87.8 | 40 | 0 |
| 1932 10 | 2  | 0  | 7 NOT NAMED | 17.6 | 89.0 | 40 | 0 |
| 1932 10 | 2  | 6  | 7 NOT NAMED | 17.8 | 90.4 | 35 | 0 |
| 1932 10 | 2  | 12 | 7 NOT NAMED | 18.1 | 91.8 | 35 | 0 |
| 1932 10 | 2  | 18 | 7 NOT NAMED | 18.4 | 93.0 | 35 | 0 |
| 1932 10 | 3  | 0  | 7 NOT NAMED | 18.7 | 94.1 | 35 | 0 |
| 1932 10 | 3  | 6  | 7 NOT NAMED | 19.0 | 95.2 | 35 | 0 |
| 1932 10 | 3  | 12 | 7 NOT NAMED | 19.3 | 96.2 | 35 | 0 |
| 1932 10 | 3  | 18 | 7 NOT NAMED | 19.6 | 97.3 | 30 | 0 |
| 1932 10 | 7  | 12 | 8 NOT NAMED | 16.0 | 83.2 | 35 | 0 |
| 1932 10 | 7  | 18 | 8 NOT NAMED | 16.2 | 83.6 | 35 | 0 |
| 1932 10 | 8  | 0  | 8 NOT NAMED | 16.4 | 84.0 | 35 | 0 |
| 1932 10 | 8  | 6  | 8 NOT NAMED | 16.5 | 84.4 | 35 | 0 |
| 1932 10 | 8  | 12 | 8 NOT NAMED | 16.6 | 84.8 | 35 | 0 |
| 1932 10 | 8  | 18 | 8 NOT NAMED | 16.8 | 85.4 | 35 | 0 |
| 1932 10 | 9  | 0  | 8 NOT NAMED | 17.0 | 86.0 | 40 | 0 |
| 1932 10 | 9  | 6  | 8 NOT NAMED | 17.1 | 86.4 | 40 | 0 |
| 1932 10 | 9  | 12 | 8 NOT NAMED | 17.3 | 86.8 | 40 | 0 |
| 1932 10 | 9  | 18 | 8 NOT NAMED | 17.5 | 87.4 | 40 | 0 |
| 1932 10 | 10 | 0  | 8 NOT NAMED | 17.8 | 88.0 | 40 | 0 |
| 1932 10 | 10 | 6  | 8 NOT NAMED | 18.0 | 88.4 | 40 | 0 |
| 1932 10 | 10 | 12 | 8 NOT NAMED | 18.1 | 88.8 | 40 | 0 |
| 1932 10 | 10 | 18 | 8 NOT NAMED | 18.2 | 89.2 | 35 | 0 |
| 1932 10 | 11 | 0  | 8 NOT NAMED | 18.3 | 89.6 | 35 | 0 |
| 1932 10 | 11 | 6  | 8 NOT NAMED | 18.5 | 90.0 | 35 | 0 |
| 1932 10 | 11 | 12 | 8 NOT NAMED | 18.6 | 90.4 | 35 | 0 |
| 1932 10 | 11 | 18 | 8 NOT NAMED | 18.7 | 90.7 | 35 | 0 |
| 1932 10 | 12 | 0  | 8 NOT NAMED | 18.8 | 91.0 | 35 | 0 |
| 1932 10 | 12 | 6  | 8 NOT NAMED | 18.9 | 91.2 | 35 | 0 |
| 1932 10 | 12 | 12 | 8 NOT NAMED | 18.9 | 91.4 | 35 | 0 |
| 1932 10 | 12 | 18 | 8 NOT NAMED | 19.1 | 91.8 | 35 | 0 |
| 1932 10 | 13 | 0  | 8 NOT NAMED | 19.3 | 92.2 | 35 | 0 |
| 1932 10 | 13 | 6  | 8 NOT NAMED | 19.5 | 92.5 | 40 | 0 |
| 1932 10 | 13 | 12 | 8 NOT NAMED | 19.7 | 92.9 | 40 | 0 |
| 1932 10 | 13 | 18 | 8 NOT NAMED | 20.1 | 93.5 | 40 | 0 |
| 1932 10 | 14 | 0  | 8 NOT NAMED | 20.8 | 94.2 | 40 | 0 |
| 1932 10 | 14 | 6  | 8 NOT NAMED | 21.8 | 94.9 | 40 | 0 |
| 1932 10 | 14 | 12 | 8 NOT NAMED | 23.0 | 95.3 | 45 | 0 |
| 1932 10 | 14 | 18 | 8 NOT NAMED | 24.3 | 95.4 | 45 | 0 |
| 1932 10 | 15 | 0  | 8 NOT NAMED | 25.6 | 95.0 | 45 | 0 |
| 1932 10 | 15 | 6  | 8 NOT NAMED | 27.2 | 94.0 | 45 | 0 |

|               |              |      |      |    |   |
|---------------|--------------|------|------|----|---|
| 1932 10 15 12 | 8 NOT NAMED  | 28.6 | 92.8 | 40 | 0 |
| 1932 10 15 18 | 8 NOT NAMED  | 29.3 | 91.8 | 40 | 0 |
| 1932 10 16 0  | 8 NOT NAMED  | 29.9 | 90.7 | 40 | 0 |
| 1932 10 16 6  | 8 NOT NAMED  | 30.8 | 89.4 | 40 | 0 |
| 1932 10 16 12 | 8 NOT NAMED  | 31.8 | 88.2 | 35 | 0 |
| 1932 10 16 18 | 8 NOT NAMED  | 32.5 | 87.3 | 30 | 0 |
| 1932 10 17 0  | 8 NOT NAMED  | 33.2 | 86.6 | 25 | 0 |
| 1932 10 17 6  | 8 NOT NAMED  | 33.8 | 86.0 | 25 | 0 |
| 1932 10 17 12 | 8 NOT NAMED  | 34.4 | 85.4 | 20 | 0 |
| 1932 10 17 18 | 8 NOT NAMED  | 35.1 | 84.7 | 20 | 0 |
| 1932 10 18 0  | 8 NOT NAMED  | 35.9 | 84.0 | 20 | 0 |
| 1932 10 18 6  | 8 NOT NAMED  | 36.6 | 83.3 | 15 | 0 |
| 1932 10 18 12 | 8 NOT NAMED  | 37.3 | 82.7 | 15 | 0 |
| 1932 10 18 18 | 8 NOT NAMED  | 38.0 | 82.1 | 15 | 0 |
| 1932 10 8 6   | 9 NOT NAMED  | 21.8 | 56.3 | 35 | 0 |
| 1932 10 8 12  | 9 NOT NAMED  | 22.8 | 58.1 | 35 | 0 |
| 1932 10 8 18  | 9 NOT NAMED  | 23.3 | 58.9 | 35 | 0 |
| 1932 10 9 0   | 9 NOT NAMED  | 23.8 | 59.6 | 35 | 0 |
| 1932 10 9 6   | 9 NOT NAMED  | 24.4 | 60.2 | 35 | 0 |
| 1932 10 9 12  | 9 NOT NAMED  | 25.1 | 60.8 | 40 | 0 |
| 1932 10 9 18  | 9 NOT NAMED  | 26.0 | 61.4 | 40 | 0 |
| 1932 10 10 0  | 9 NOT NAMED  | 27.1 | 62.0 | 40 | 0 |
| 1932 10 10 6  | 9 NOT NAMED  | 29.3 | 62.5 | 45 | 0 |
| 1932 10 10 12 | 9 NOT NAMED  | 31.4 | 62.9 | 45 | 0 |
| 1932 10 10 18 | 9 NOT NAMED  | 32.4 | 63.0 | 45 | 0 |
| 1932 10 11 0  | 9 NOT NAMED  | 33.4 | 63.0 | 45 | 0 |
| 1932 10 11 6  | 9 NOT NAMED  | 34.5 | 63.0 | 40 | 0 |
| 1932 10 11 12 | 9 NOT NAMED  | 35.7 | 62.8 | 40 | 0 |
| 1932 10 11 18 | 9 NOT NAMED  | 37.2 | 62.0 | 35 | 0 |
| 1932 10 12 0  | 9 NOT NAMED  | 39.0 | 60.5 | 35 | 0 |
| 1932 10 12 6  | 9 NOT NAMED  | 41.8 | 56.5 | 30 | 0 |
| 1932 10 30 6  | 10 NOT NAMED | 17.7 | 54.6 | 35 | 0 |
| 1932 10 30 12 | 10 NOT NAMED | 17.6 | 56.3 | 35 | 0 |
| 1932 10 30 18 | 10 NOT NAMED | 17.5 | 57.2 | 35 | 0 |
| 1932 10 31 0  | 10 NOT NAMED | 17.3 | 58.2 | 40 | 0 |
| 1932 10 31 6  | 10 NOT NAMED | 17.1 | 59.3 | 40 | 0 |
| 1932 10 31 12 | 10 NOT NAMED | 16.7 | 60.5 | 45 | 0 |
| 1932 10 31 18 | 10 NOT NAMED | 16.2 | 61.7 | 50 | 0 |
| 1932 11 1 0   | 10 NOT NAMED | 15.7 | 62.8 | 55 | 0 |
| 1932 11 1 6   | 10 NOT NAMED | 15.2 | 64.0 | 60 | 0 |
| 1932 11 1 12  | 10 NOT NAMED | 14.7 | 65.1 | 65 | 0 |
| 1932 11 1 18  | 10 NOT NAMED | 14.2 | 66.2 | 70 | 0 |
| 1932 11 2 0   | 10 NOT NAMED | 13.8 | 67.3 | 70 | 0 |
| 1932 11 2 6   | 10 NOT NAMED | 13.5 | 68.3 | 75 | 0 |

|      |    |    |    |    |           |      |      |     |   |
|------|----|----|----|----|-----------|------|------|-----|---|
| 1932 | 11 | 2  | 12 | 10 | NOT NAMED | 13.3 | 69.1 | 75  | 0 |
| 1932 | 11 | 2  | 18 | 10 | NOT NAMED | 13.1 | 69.7 | 80  | 0 |
| 1932 | 11 | 3  | 0  | 10 | NOT NAMED | 13.0 | 70.3 | 80  | 0 |
| 1932 | 11 | 3  | 6  | 10 | NOT NAMED | 13.0 | 70.8 | 85  | 0 |
| 1932 | 11 | 3  | 12 | 10 | NOT NAMED | 12.9 | 71.3 | 85  | 0 |
| 1932 | 11 | 3  | 18 | 10 | NOT NAMED | 12.9 | 72.1 | 85  | 0 |
| 1932 | 11 | 4  | 0  | 10 | NOT NAMED | 12.9 | 72.9 | 90  | 0 |
| 1932 | 11 | 4  | 6  | 10 | NOT NAMED | 13.0 | 73.7 | 90  | 0 |
| 1932 | 11 | 4  | 12 | 10 | NOT NAMED | 13.1 | 74.4 | 90  | 0 |
| 1932 | 11 | 4  | 18 | 10 | NOT NAMED | 13.2 | 75.0 | 90  | 0 |
| 1932 | 11 | 5  | 0  | 10 | NOT NAMED | 13.3 | 75.6 | 95  | 0 |
| 1932 | 11 | 5  | 6  | 10 | NOT NAMED | 13.5 | 76.4 | 95  | 0 |
| 1932 | 11 | 5  | 12 | 10 | NOT NAMED | 13.7 | 77.2 | 95  | 0 |
| 1932 | 11 | 5  | 18 | 10 | NOT NAMED | 13.9 | 78.0 | 100 | 0 |
| 1932 | 11 | 6  | 0  | 10 | NOT NAMED | 14.1 | 78.7 | 100 | 0 |
| 1932 | 11 | 6  | 6  | 10 | NOT NAMED | 14.3 | 79.2 | 100 | 0 |
| 1932 | 11 | 6  | 12 | 10 | NOT NAMED | 14.4 | 79.5 | 105 | 0 |
| 1932 | 11 | 6  | 18 | 10 | NOT NAMED | 14.6 | 79.9 | 105 | 0 |
| 1932 | 11 | 7  | 0  | 10 | NOT NAMED | 14.8 | 80.2 | 105 | 0 |
| 1932 | 11 | 7  | 6  | 10 | NOT NAMED | 15.0 | 80.4 | 105 | 0 |
| 1932 | 11 | 7  | 12 | 10 | NOT NAMED | 15.3 | 80.7 | 110 | 0 |
| 1932 | 11 | 7  | 18 | 10 | NOT NAMED | 15.8 | 80.9 | 110 | 0 |
| 1932 | 11 | 8  | 0  | 10 | NOT NAMED | 16.4 | 81.1 | 110 | 0 |
| 1932 | 11 | 8  | 6  | 10 | NOT NAMED | 17.1 | 81.1 | 110 | 0 |
| 1932 | 11 | 8  | 12 | 10 | NOT NAMED | 17.7 | 81.0 | 110 | 0 |
| 1932 | 11 | 8  | 18 | 10 | NOT NAMED | 18.3 | 80.8 | 115 | 0 |
| 1932 | 11 | 9  | 0  | 10 | NOT NAMED | 18.9 | 80.6 | 115 | 0 |
| 1932 | 11 | 9  | 6  | 10 | NOT NAMED | 19.5 | 80.3 | 115 | 0 |
| 1932 | 11 | 9  | 12 | 10 | NOT NAMED | 20.2 | 79.7 | 115 | 0 |
| 1932 | 11 | 9  | 18 | 10 | NOT NAMED | 21.4 | 78.4 | 115 | 0 |
| 1932 | 11 | 10 | 0  | 10 | NOT NAMED | 22.7 | 76.9 | 110 | 0 |
| 1932 | 11 | 10 | 6  | 10 | NOT NAMED | 23.5 | 75.6 | 105 | 0 |
| 1932 | 11 | 10 | 12 | 10 | NOT NAMED | 24.4 | 74.2 | 100 | 0 |
| 1932 | 11 | 10 | 18 | 10 | NOT NAMED | 25.3 | 72.6 | 95  | 0 |
| 1932 | 11 | 11 | 0  | 10 | NOT NAMED | 26.2 | 70.9 | 90  | 0 |
| 1932 | 11 | 11 | 6  | 10 | NOT NAMED | 27.1 | 69.4 | 90  | 0 |
| 1932 | 11 | 11 | 12 | 10 | NOT NAMED | 28.1 | 68.0 | 85  | 0 |
| 1932 | 11 | 11 | 18 | 10 | NOT NAMED | 29.0 | 66.8 | 85  | 0 |
| 1932 | 11 | 12 | 0  | 10 | NOT NAMED | 29.9 | 65.6 | 80  | 0 |
| 1932 | 11 | 12 | 6  | 10 | NOT NAMED | 30.7 | 64.5 | 80  | 0 |
| 1932 | 11 | 12 | 12 | 10 | NOT NAMED | 31.5 | 63.5 | 75  | 0 |
| 1932 | 11 | 12 | 18 | 10 | NOT NAMED | 33.0 | 61.9 | 75  | 0 |
| 1932 | 11 | 13 | 0  | 10 | NOT NAMED | 35.0 | 59.6 | 70  | 0 |
| 1932 | 11 | 13 | 6  | 10 | NOT NAMED | 37.3 | 56.4 | 65  | 0 |

|                            |      |      |    |   |
|----------------------------|------|------|----|---|
| 1932 11 13 12 10 NOT NAMED | 39.3 | 53.3 | 60 | 0 |
| 1932 11 13 18 10 NOT NAMED | 40.2 | 50.7 | 60 | 0 |
| 1932 11 14 0 10 NOT NAMED  | 40.3 | 48.0 | 55 | 0 |
| 1932 11 14 6 10 NOT NAMED  | 40.2 | 45.3 | 50 | 0 |
| 1932 11 14 12 10 NOT NAMED | 40.0 | 42.7 | 45 | 0 |
| 1932 11 14 18 10 NOT NAMED | 39.8 | 38.9 | 45 | 0 |
| 1932 11 3 6 11 NOT NAMED   | 13.2 | 47.8 | 35 | 0 |
| 1932 11 3 12 11 NOT NAMED  | 14.9 | 48.0 | 35 | 0 |
| 1932 11 3 18 11 NOT NAMED  | 16.5 | 48.2 | 35 | 0 |
| 1932 11 4 0 11 NOT NAMED   | 18.0 | 47.9 | 35 | 0 |
| 1932 11 4 6 11 NOT NAMED   | 19.4 | 47.2 | 35 | 0 |
| 1932 11 4 12 11 NOT NAMED  | 20.7 | 46.2 | 40 | 0 |
| 1932 11 4 18 11 NOT NAMED  | 22.0 | 45.0 | 40 | 0 |
| 1932 11 5 0 11 NOT NAMED   | 23.0 | 44.0 | 40 | 0 |
| 1932 11 5 6 11 NOT NAMED   | 23.7 | 43.7 | 40 | 0 |
| 1932 11 5 12 11 NOT NAMED  | 24.4 | 43.9 | 45 | 0 |
| 1932 11 5 18 11 NOT NAMED  | 25.1 | 44.3 | 45 | 0 |
| 1932 11 6 0 11 NOT NAMED   | 25.7 | 44.8 | 45 | 0 |
| 1932 11 6 6 11 NOT NAMED   | 26.1 | 45.1 | 50 | 0 |
| 1932 11 6 12 11 NOT NAMED  | 26.3 | 45.6 | 50 | 0 |
| 1932 11 6 18 11 NOT NAMED  | 26.5 | 46.1 | 55 | 0 |
| 1932 11 7 0 11 NOT NAMED   | 26.7 | 46.6 | 55 | 0 |
| 1932 11 7 6 11 NOT NAMED   | 27.0 | 47.3 | 55 | 0 |
| 1932 11 7 12 11 NOT NAMED  | 27.5 | 48.0 | 60 | 0 |
| 1932 11 7 18 11 NOT NAMED  | 28.2 | 48.0 | 65 | 0 |
| 1932 11 8 0 11 NOT NAMED   | 29.1 | 47.4 | 70 | 0 |
| 1932 11 8 6 11 NOT NAMED   | 30.6 | 46.4 | 75 | 0 |
| 1932 11 8 12 11 NOT NAMED  | 32.2 | 45.4 | 80 | 0 |
| 1932 11 8 18 11 NOT NAMED  | 32.8 | 45.0 | 85 | 0 |
| 1932 11 9 0 11 NOT NAMED   | 33.2 | 44.2 | 85 | 0 |
| 1932 11 9 6 11 NOT NAMED   | 34.6 | 42.9 | 85 | 0 |
| 1932 11 9 12 11 NOT NAMED  | 35.8 | 40.7 | 80 | 0 |
| 1932 11 9 18 11 NOT NAMED  | 36.8 | 37.8 | 75 | 0 |
| 1932 11 10 0 11 NOT NAMED  | 37.3 | 34.8 | 70 | 0 |
| 1932 11 10 6 11 NOT NAMED  | 37.5 | 31.8 | 65 | 0 |
| 1932 11 10 12 11 NOT NAMED | 37.6 | 28.7 | 65 | 0 |
| 1932 11 10 18 11 NOT NAMED | 37.7 | 26.0 | 60 | 0 |
| 1933 5 14 12 1 NOT NAMED   | 12.8 | 79.4 | 35 | 0 |
| 1933 5 14 18 1 NOT NAMED   | 13.8 | 80.0 | 35 | 0 |
| 1933 5 15 0 1 NOT NAMED    | 15.0 | 81.0 | 35 | 0 |
| 1933 5 15 6 1 NOT NAMED    | 16.5 | 82.0 | 35 | 0 |
| 1933 5 15 12 1 NOT NAMED   | 17.9 | 83.1 | 35 | 0 |
| 1933 5 15 18 1 NOT NAMED   | 18.8 | 83.8 | 35 | 0 |
| 1933 5 16 0 1 NOT NAMED    | 19.7 | 84.6 | 40 | 0 |

|      |   |    |    |   |           |      |      |    |     |
|------|---|----|----|---|-----------|------|------|----|-----|
| 1933 | 5 | 16 | 6  | 1 | NOT NAMED | 20.7 | 85.5 | 40 | 0   |
| 1933 | 5 | 16 | 12 | 1 | NOT NAMED | 21.6 | 86.4 | 40 | 0   |
| 1933 | 5 | 16 | 18 | 1 | NOT NAMED | 21.9 | 87.4 | 40 | 0   |
| 1933 | 5 | 17 | 0  | 1 | NOT NAMED | 22.0 | 88.5 | 40 | 0   |
| 1933 | 5 | 17 | 6  | 1 | NOT NAMED | 21.8 | 89.4 | 35 | 0   |
| 1933 | 5 | 17 | 12 | 1 | NOT NAMED | 21.6 | 90.0 | 35 | 0   |
| 1933 | 5 | 17 | 18 | 1 | NOT NAMED | 21.3 | 90.7 | 35 | 0   |
| 1933 | 5 | 18 | 0  | 1 | NOT NAMED | 21.0 | 91.0 | 35 | 0   |
| 1933 | 5 | 18 | 6  | 1 | NOT NAMED | 20.6 | 91.4 | 35 | 0   |
| 1933 | 5 | 18 | 12 | 1 | NOT NAMED | 20.1 | 91.9 | 35 | 0   |
| 1933 | 5 | 18 | 18 | 1 | NOT NAMED | 19.7 | 92.0 | 35 | 0   |
| 1933 | 5 | 19 | 0  | 1 | NOT NAMED | 19.3 | 92.1 | 35 | 0   |
| 1933 | 5 | 19 | 6  | 1 | NOT NAMED | 18.9 | 92.2 | 35 | 0   |
| 1933 | 5 | 19 | 12 | 1 | NOT NAMED | 18.6 | 92.2 | 35 | 0   |
| 1933 | 5 | 19 | 18 | 1 | NOT NAMED | 18.3 | 92.2 | 30 | 0   |
| 1933 | 6 | 27 | 0  | 2 | NOT NAMED | 8.8  | 56.2 | 45 | 0   |
| 1933 | 6 | 27 | 6  | 2 | NOT NAMED | 9.0  | 57.7 | 55 | 0   |
| 1933 | 6 | 27 | 12 | 2 | NOT NAMED | 9.3  | 59.2 | 65 | 0   |
| 1933 | 6 | 27 | 18 | 2 | NOT NAMED | 9.7  | 60.7 | 70 | 0   |
| 1933 | 6 | 28 | 0  | 2 | NOT NAMED | 10.1 | 62.1 | 65 | 986 |
| 1933 | 6 | 28 | 6  | 2 | NOT NAMED | 10.5 | 63.4 | 65 | 0   |
| 1933 | 6 | 28 | 12 | 2 | NOT NAMED | 10.8 | 64.4 | 60 | 0   |
| 1933 | 6 | 28 | 18 | 2 | NOT NAMED | 11.1 | 65.5 | 55 | 0   |
| 1933 | 6 | 29 | 0  | 2 | NOT NAMED | 11.4 | 66.6 | 50 | 0   |
| 1933 | 6 | 29 | 6  | 2 | NOT NAMED | 11.7 | 67.5 | 50 | 0   |
| 1933 | 6 | 29 | 12 | 2 | NOT NAMED | 11.9 | 68.4 | 50 | 0   |
| 1933 | 6 | 29 | 18 | 2 | NOT NAMED | 12.1 | 69.7 | 50 | 0   |
| 1933 | 6 | 30 | 0  | 2 | NOT NAMED | 12.3 | 71.0 | 50 | 0   |
| 1933 | 6 | 30 | 6  | 2 | NOT NAMED | 12.5 | 72.3 | 50 | 0   |
| 1933 | 6 | 30 | 12 | 2 | NOT NAMED | 12.8 | 73.7 | 55 | 0   |
| 1933 | 6 | 30 | 18 | 2 | NOT NAMED | 13.1 | 74.8 | 60 | 0   |
| 1933 | 7 | 1  | 0  | 2 | NOT NAMED | 13.6 | 76.1 | 65 | 0   |
| 1933 | 7 | 1  | 6  | 2 | NOT NAMED | 14.1 | 77.1 | 65 | 0   |
| 1933 | 7 | 1  | 12 | 2 | NOT NAMED | 14.9 | 78.2 | 65 | 0   |
| 1933 | 7 | 1  | 18 | 2 | NOT NAMED | 16.0 | 79.4 | 70 | 0   |
| 1933 | 7 | 2  | 0  | 2 | NOT NAMED | 17.2 | 80.5 | 70 | 0   |
| 1933 | 7 | 2  | 6  | 2 | NOT NAMED | 18.1 | 81.3 | 70 | 0   |
| 1933 | 7 | 2  | 12 | 2 | NOT NAMED | 19.2 | 82.0 | 75 | 0   |
| 1933 | 7 | 2  | 18 | 2 | NOT NAMED | 20.1 | 82.5 | 75 | 0   |
| 1933 | 7 | 3  | 0  | 2 | NOT NAMED | 21.1 | 83.1 | 80 | 0   |
| 1933 | 7 | 3  | 6  | 2 | NOT NAMED | 22.0 | 83.9 | 80 | 0   |
| 1933 | 7 | 3  | 12 | 2 | NOT NAMED | 22.9 | 84.6 | 80 | 0   |
| 1933 | 7 | 3  | 18 | 2 | NOT NAMED | 23.3 | 85.1 | 80 | 0   |
| 1933 | 7 | 4  | 0  | 2 | NOT NAMED | 23.6 | 85.6 | 85 | 0   |

|      |   |    |    |             |      |      |    |   |
|------|---|----|----|-------------|------|------|----|---|
| 1933 | 7 | 4  | 6  | 2 NOT NAMED | 24.1 | 86.3 | 85 | 0 |
| 1933 | 7 | 4  | 12 | 2 NOT NAMED | 24.6 | 87.0 | 85 | 0 |
| 1933 | 7 | 4  | 18 | 2 NOT NAMED | 25.1 | 87.9 | 85 | 0 |
| 1933 | 7 | 5  | 0  | 2 NOT NAMED | 25.6 | 88.7 | 90 | 0 |
| 1933 | 7 | 5  | 6  | 2 NOT NAMED | 26.0 | 89.8 | 90 | 0 |
| 1933 | 7 | 5  | 12 | 2 NOT NAMED | 26.0 | 90.9 | 85 | 0 |
| 1933 | 7 | 5  | 18 | 2 NOT NAMED | 25.8 | 92.2 | 85 | 0 |
| 1933 | 7 | 6  | 0  | 2 NOT NAMED | 25.5 | 93.4 | 85 | 0 |
| 1933 | 7 | 6  | 6  | 2 NOT NAMED | 25.2 | 94.3 | 80 | 0 |
| 1933 | 7 | 6  | 12 | 2 NOT NAMED | 24.8 | 95.2 | 75 | 0 |
| 1933 | 7 | 6  | 18 | 2 NOT NAMED | 24.3 | 96.2 | 75 | 0 |
| 1933 | 7 | 7  | 0  | 2 NOT NAMED | 23.8 | 97.4 | 70 | 0 |
| 1933 | 7 | 7  | 6  | 2 NOT NAMED | 23.0 | 98.5 | 60 | 0 |
| 1933 | 7 | 14 | 0  | 3 NOT NAMED | 17.5 | 59.8 | 35 | 0 |
| 1933 | 7 | 14 | 6  | 3 NOT NAMED | 17.5 | 61.5 | 35 | 0 |
| 1933 | 7 | 14 | 12 | 3 NOT NAMED | 17.4 | 63.1 | 35 | 0 |
| 1933 | 7 | 14 | 18 | 3 NOT NAMED | 17.4 | 64.6 | 35 | 0 |
| 1933 | 7 | 15 | 0  | 3 NOT NAMED | 17.3 | 65.9 | 35 | 0 |
| 1933 | 7 | 15 | 6  | 3 NOT NAMED | 17.3 | 67.2 | 35 | 0 |
| 1933 | 7 | 15 | 12 | 3 NOT NAMED | 17.3 | 68.6 | 35 | 0 |
| 1933 | 7 | 15 | 18 | 3 NOT NAMED | 17.4 | 70.1 | 40 | 0 |
| 1933 | 7 | 16 | 0  | 3 NOT NAMED | 17.5 | 71.8 | 40 | 0 |
| 1933 | 7 | 16 | 6  | 3 NOT NAMED | 17.8 | 73.5 | 40 | 0 |
| 1933 | 7 | 16 | 12 | 3 NOT NAMED | 18.1 | 75.2 | 45 | 0 |
| 1933 | 7 | 16 | 18 | 3 NOT NAMED | 18.5 | 77.0 | 45 | 0 |
| 1933 | 7 | 17 | 0  | 3 NOT NAMED | 18.9 | 78.8 | 45 | 0 |
| 1933 | 7 | 17 | 6  | 3 NOT NAMED | 19.3 | 80.1 | 45 | 0 |
| 1933 | 7 | 17 | 12 | 3 NOT NAMED | 19.6 | 81.3 | 45 | 0 |
| 1933 | 7 | 17 | 18 | 3 NOT NAMED | 19.9 | 82.9 | 40 | 0 |
| 1933 | 7 | 18 | 0  | 3 NOT NAMED | 20.1 | 84.6 | 40 | 0 |
| 1933 | 7 | 18 | 6  | 3 NOT NAMED | 20.1 | 86.3 | 40 | 0 |
| 1933 | 7 | 18 | 12 | 3 NOT NAMED | 20.1 | 88.0 | 40 | 0 |
| 1933 | 7 | 18 | 18 | 3 NOT NAMED | 20.2 | 89.0 | 40 | 0 |
| 1933 | 7 | 19 | 0  | 3 NOT NAMED | 20.2 | 89.8 | 35 | 0 |
| 1933 | 7 | 19 | 6  | 3 NOT NAMED | 20.3 | 91.2 | 35 | 0 |
| 1933 | 7 | 19 | 12 | 3 NOT NAMED | 20.3 | 92.6 | 35 | 0 |
| 1933 | 7 | 19 | 18 | 3 NOT NAMED | 20.3 | 94.0 | 35 | 0 |
| 1933 | 7 | 20 | 0  | 3 NOT NAMED | 20.4 | 95.5 | 35 | 0 |
| 1933 | 7 | 20 | 6  | 3 NOT NAMED | 20.4 | 97.0 | 30 | 0 |
| 1933 | 7 | 21 | 6  | 4 NOT NAMED | 22.0 | 90.9 | 35 | 0 |
| 1933 | 7 | 21 | 12 | 4 NOT NAMED | 23.1 | 92.1 | 35 | 0 |
| 1933 | 7 | 21 | 18 | 4 NOT NAMED | 23.7 | 92.7 | 35 | 0 |
| 1933 | 7 | 22 | 0  | 4 NOT NAMED | 24.4 | 93.3 | 35 | 0 |
| 1933 | 7 | 22 | 6  | 4 NOT NAMED | 25.4 | 94.0 | 40 | 0 |

|      |         |             |      |      |    |   |
|------|---------|-------------|------|------|----|---|
| 1933 | 7 22 12 | 4 NOT NAMED | 26.3 | 94.6 | 40 | 0 |
| 1933 | 7 22 18 | 4 NOT NAMED | 27.1 | 95.1 | 40 | 0 |
| 1933 | 7 23 0  | 4 NOT NAMED | 27.9 | 95.5 | 40 | 0 |
| 1933 | 7 23 6  | 4 NOT NAMED | 28.8 | 95.9 | 40 | 0 |
| 1933 | 7 23 12 | 4 NOT NAMED | 29.8 | 96.2 | 35 | 0 |
| 1933 | 7 23 18 | 4 NOT NAMED | 30.7 | 96.2 | 35 | 0 |
| 1933 | 7 24 0  | 4 NOT NAMED | 31.6 | 96.0 | 35 | 0 |
| 1933 | 7 24 6  | 4 NOT NAMED | 32.4 | 95.0 | 35 | 0 |
| 1933 | 7 24 12 | 4 NOT NAMED | 32.5 | 94.5 | 30 | 0 |
| 1933 | 7 24 18 | 4 NOT NAMED | 32.5 | 94.1 | 30 | 0 |
| 1933 | 7 25 0  | 4 NOT NAMED | 32.6 | 93.8 | 25 | 0 |
| 1933 | 7 25 6  | 4 NOT NAMED | 32.6 | 93.3 | 25 | 0 |
| 1933 | 7 25 12 | 4 NOT NAMED | 32.7 | 92.9 | 20 | 0 |
| 1933 | 7 25 18 | 4 NOT NAMED | 32.7 | 92.7 | 20 | 0 |
| 1933 | 7 26 0  | 4 NOT NAMED | 32.7 | 92.4 | 20 | 0 |
| 1933 | 7 26 6  | 4 NOT NAMED | 32.8 | 91.9 | 20 | 0 |
| 1933 | 7 26 12 | 4 NOT NAMED | 32.8 | 91.4 | 20 | 0 |
| 1933 | 7 26 18 | 4 NOT NAMED | 33.6 | 91.0 | 20 | 0 |
| 1933 | 7 27 0  | 4 NOT NAMED | 34.1 | 90.9 | 20 | 0 |
| 1933 | 7 27 6  | 4 NOT NAMED | 34.6 | 90.8 | 20 | 0 |
| 1933 | 7 27 12 | 4 NOT NAMED | 35.1 | 90.7 | 20 | 0 |
| 1933 | 7 27 18 | 4 NOT NAMED | 35.6 | 90.6 | 20 | 0 |
| 1933 | 7 25 6  | 5 NOT NAMED | 16.5 | 57.5 | 40 | 0 |
| 1933 | 7 25 12 | 5 NOT NAMED | 17.2 | 60.4 | 45 | 0 |
| 1933 | 7 25 18 | 5 NOT NAMED | 17.8 | 62.1 | 45 | 0 |
| 1933 | 7 26 0  | 5 NOT NAMED | 18.3 | 63.6 | 50 | 0 |
| 1933 | 7 26 6  | 5 NOT NAMED | 18.8 | 65.0 | 60 | 0 |
| 1933 | 7 26 12 | 5 NOT NAMED | 19.3 | 66.3 | 65 | 0 |
| 1933 | 7 26 18 | 5 NOT NAMED | 19.7 | 67.5 | 70 | 0 |
| 1933 | 7 27 0  | 5 NOT NAMED | 20.2 | 68.6 | 75 | 0 |
| 1933 | 7 27 6  | 5 NOT NAMED | 20.8 | 69.6 | 75 | 0 |
| 1933 | 7 27 12 | 5 NOT NAMED | 21.4 | 70.5 | 75 | 0 |
| 1933 | 7 27 18 | 5 NOT NAMED | 22.0 | 71.6 | 80 | 0 |
| 1933 | 7 28 0  | 5 NOT NAMED | 22.7 | 72.7 | 80 | 0 |
| 1933 | 7 28 6  | 5 NOT NAMED | 23.4 | 73.5 | 80 | 0 |
| 1933 | 7 28 12 | 5 NOT NAMED | 24.0 | 74.2 | 80 | 0 |
| 1933 | 7 28 18 | 5 NOT NAMED | 24.6 | 74.9 | 80 | 0 |
| 1933 | 7 29 0  | 5 NOT NAMED | 25.2 | 75.6 | 80 | 0 |
| 1933 | 7 29 6  | 5 NOT NAMED | 25.7 | 76.2 | 80 | 0 |
| 1933 | 7 29 12 | 5 NOT NAMED | 26.1 | 76.9 | 80 | 0 |
| 1933 | 7 29 18 | 5 NOT NAMED | 26.6 | 77.7 | 75 | 0 |
| 1933 | 7 30 0  | 5 NOT NAMED | 27.0 | 78.6 | 75 | 0 |
| 1933 | 7 30 6  | 5 NOT NAMED | 27.2 | 79.3 | 75 | 0 |
| 1933 | 7 30 12 | 5 NOT NAMED | 27.3 | 79.8 | 70 | 0 |



|      |   |    |    |             |      |      |    |     |
|------|---|----|----|-------------|------|------|----|-----|
| 1933 | 7 | 30 | 18 | 5 NOT NAMED | 27.4 | 80.1 | 70 | 0   |
| 1933 | 7 | 31 | 0  | 5 NOT NAMED | 27.4 | 80.5 | 65 | 0   |
| 1933 | 7 | 31 | 6  | 5 NOT NAMED | 27.4 | 81.0 | 60 | 0   |
| 1933 | 7 | 31 | 12 | 5 NOT NAMED | 27.4 | 81.6 | 55 | 0   |
| 1933 | 7 | 31 | 18 | 5 NOT NAMED | 27.4 | 82.3 | 45 | 0   |
| 1933 | 8 | 1  | 0  | 5 NOT NAMED | 27.4 | 83.0 | 40 | 0   |
| 1933 | 8 | 1  | 6  | 5 NOT NAMED | 27.4 | 83.7 | 40 | 0   |
| 1933 | 8 | 1  | 12 | 5 NOT NAMED | 27.4 | 84.5 | 35 | 0   |
| 1933 | 8 | 1  | 18 | 5 NOT NAMED | 27.4 | 85.3 | 35 | 0   |
| 1933 | 8 | 2  | 0  | 5 NOT NAMED | 27.4 | 86.2 | 40 | 0   |
| 1933 | 8 | 2  | 6  | 5 NOT NAMED | 27.4 | 86.9 | 40 | 0   |
| 1933 | 8 | 2  | 12 | 5 NOT NAMED | 27.4 | 87.7 | 45 | 0   |
| 1933 | 8 | 2  | 18 | 5 NOT NAMED | 27.4 | 88.7 | 45 | 0   |
| 1933 | 8 | 3  | 0  | 5 NOT NAMED | 27.3 | 89.8 | 50 | 0   |
| 1933 | 8 | 3  | 6  | 5 NOT NAMED | 27.3 | 90.9 | 50 | 0   |
| 1933 | 8 | 3  | 12 | 5 NOT NAMED | 27.2 | 92.0 | 55 | 0   |
| 1933 | 8 | 3  | 18 | 5 NOT NAMED | 27.0 | 93.0 | 55 | 0   |
| 1933 | 8 | 4  | 0  | 5 NOT NAMED | 26.8 | 93.8 | 60 | 0   |
| 1933 | 8 | 4  | 6  | 5 NOT NAMED | 26.6 | 94.5 | 60 | 0   |
| 1933 | 8 | 4  | 12 | 5 NOT NAMED | 26.4 | 95.2 | 65 | 0   |
| 1933 | 8 | 4  | 18 | 5 NOT NAMED | 26.1 | 96.2 | 70 | 0   |
| 1933 | 8 | 5  | 0  | 5 NOT NAMED | 25.7 | 97.1 | 60 | 981 |
| 1933 | 8 | 5  | 6  | 5 NOT NAMED | 25.5 | 97.7 | 55 | 0   |
| 1933 | 8 | 5  | 12 | 5 NOT NAMED | 25.2 | 98.3 | 50 | 0   |
| 1933 | 8 | 5  | 18 | 5 NOT NAMED | 24.1 | 98.9 | 35 | 0   |
| 1933 | 8 | 12 | 6  | 6 NOT NAMED | 12.0 | 59.8 | 35 | 0   |
| 1933 | 8 | 12 | 12 | 6 NOT NAMED | 12.9 | 61.9 | 35 | 0   |
| 1933 | 8 | 12 | 18 | 6 NOT NAMED | 13.3 | 63.1 | 35 | 0   |
| 1933 | 8 | 13 | 0  | 6 NOT NAMED | 13.7 | 64.1 | 35 | 0   |
| 1933 | 8 | 13 | 6  | 6 NOT NAMED | 14.0 | 65.0 | 40 | 0   |
| 1933 | 8 | 13 | 12 | 6 NOT NAMED | 14.2 | 65.8 | 40 | 0   |
| 1933 | 8 | 13 | 18 | 6 NOT NAMED | 14.3 | 66.7 | 40 | 0   |
| 1933 | 8 | 14 | 0  | 6 NOT NAMED | 14.4 | 67.6 | 40 | 0   |
| 1933 | 8 | 14 | 6  | 6 NOT NAMED | 14.4 | 68.6 | 45 | 0   |
| 1933 | 8 | 14 | 12 | 6 NOT NAMED | 14.4 | 69.7 | 45 | 0   |
| 1933 | 8 | 14 | 18 | 6 NOT NAMED | 14.5 | 70.6 | 45 | 0   |
| 1933 | 8 | 15 | 0  | 6 NOT NAMED | 14.8 | 71.5 | 50 | 0   |
| 1933 | 8 | 15 | 6  | 6 NOT NAMED | 15.1 | 72.6 | 50 | 0   |
| 1933 | 8 | 15 | 12 | 6 NOT NAMED | 15.5 | 73.7 | 50 | 0   |
| 1933 | 8 | 15 | 18 | 6 NOT NAMED | 15.9 | 74.8 | 50 | 0   |
| 1933 | 8 | 16 | 0  | 6 NOT NAMED | 16.4 | 76.0 | 50 | 0   |
| 1933 | 8 | 16 | 6  | 6 NOT NAMED | 16.9 | 77.2 | 45 | 0   |
| 1933 | 8 | 16 | 12 | 6 NOT NAMED | 17.4 | 78.3 | 45 | 0   |
| 1933 | 8 | 16 | 18 | 6 NOT NAMED | 17.9 | 79.3 | 45 | 0   |

|      |      |    |             |      |      |    |   |
|------|------|----|-------------|------|------|----|---|
| 1933 | 8 17 | 0  | 6 NOT NAMED | 18.5 | 80.2 | 40 | 0 |
| 1933 | 8 17 | 6  | 6 NOT NAMED | 19.4 | 81.3 | 40 | 0 |
| 1933 | 8 17 | 12 | 6 NOT NAMED | 20.3 | 82.3 | 40 | 0 |
| 1933 | 8 17 | 18 | 6 NOT NAMED | 21.0 | 82.8 | 40 | 0 |
| 1933 | 8 18 | 0  | 6 NOT NAMED | 21.6 | 83.2 | 35 | 0 |
| 1933 | 8 18 | 6  | 6 NOT NAMED | 22.5 | 83.6 | 35 | 0 |
| 1933 | 8 18 | 12 | 6 NOT NAMED | 23.4 | 83.9 | 40 | 0 |
| 1933 | 8 18 | 18 | 6 NOT NAMED | 24.0 | 84.1 | 40 | 0 |
| 1933 | 8 19 | 0  | 6 NOT NAMED | 24.5 | 84.1 | 40 | 0 |
| 1933 | 8 19 | 6  | 6 NOT NAMED | 25.2 | 84.1 | 40 | 0 |
| 1933 | 8 19 | 12 | 6 NOT NAMED | 26.0 | 84.1 | 40 | 0 |
| 1933 | 8 19 | 18 | 6 NOT NAMED | 27.2 | 84.1 | 40 | 0 |
| 1933 | 8 20 | 0  | 6 NOT NAMED | 28.3 | 84.1 | 40 | 0 |
| 1933 | 8 20 | 6  | 6 NOT NAMED | 28.9 | 84.1 | 40 | 0 |
| 1933 | 8 20 | 12 | 6 NOT NAMED | 29.4 | 84.0 | 40 | 0 |
| 1933 | 8 20 | 18 | 6 NOT NAMED | 32.0 | 83.9 | 35 | 0 |
| 1933 | 8 16 | 18 | 7 NOT NAMED | 11.0 | 58.0 | 35 | 0 |
| 1933 | 8 17 | 0  | 7 NOT NAMED | 11.8 | 60.6 | 35 | 0 |
| 1933 | 8 17 | 6  | 7 NOT NAMED | 12.1 | 61.8 | 35 | 0 |
| 1933 | 8 17 | 12 | 7 NOT NAMED | 12.5 | 63.0 | 35 | 0 |
| 1933 | 8 17 | 18 | 7 NOT NAMED | 12.8 | 64.1 | 35 | 0 |
| 1933 | 8 18 | 0  | 7 NOT NAMED | 13.0 | 65.1 | 35 | 0 |
| 1933 | 8 18 | 6  | 7 NOT NAMED | 13.3 | 66.1 | 35 | 0 |
| 1933 | 8 18 | 12 | 7 NOT NAMED | 13.5 | 67.0 | 35 | 0 |
| 1933 | 8 18 | 18 | 7 NOT NAMED | 13.9 | 68.1 | 35 | 0 |
| 1933 | 8 19 | 0  | 7 NOT NAMED | 14.1 | 69.3 | 35 | 0 |
| 1933 | 8 19 | 6  | 7 NOT NAMED | 14.1 | 70.0 | 35 | 0 |
| 1933 | 8 19 | 12 | 7 NOT NAMED | 14.2 | 70.8 | 35 | 0 |
| 1933 | 8 19 | 18 | 7 NOT NAMED | 14.3 | 72.0 | 35 | 0 |
| 1933 | 8 20 | 0  | 7 NOT NAMED | 14.3 | 73.2 | 35 | 0 |
| 1933 | 8 20 | 6  | 7 NOT NAMED | 14.4 | 74.3 | 35 | 0 |
| 1933 | 8 20 | 12 | 7 NOT NAMED | 14.5 | 75.2 | 30 | 0 |
| 1933 | 8 20 | 18 | 7 NOT NAMED | 14.6 | 75.8 | 30 | 0 |
| 1933 | 8 21 | 0  | 7 NOT NAMED | 14.6 | 76.5 | 30 | 0 |
| 1933 | 8 21 | 6  | 7 NOT NAMED | 14.6 | 77.3 | 25 | 0 |
| 1933 | 8 21 | 12 | 7 NOT NAMED | 14.7 | 78.1 | 25 | 0 |
| 1933 | 8 21 | 18 | 7 NOT NAMED | 14.7 | 80.3 | 20 | 0 |
| 1933 | 8 17 | 6  | 8 NOT NAMED | 17.5 | 48.0 | 50 | 0 |
| 1933 | 8 17 | 12 | 8 NOT NAMED | 17.9 | 49.5 | 60 | 0 |
| 1933 | 8 17 | 18 | 8 NOT NAMED | 19.0 | 51.2 | 65 | 0 |
| 1933 | 8 18 | 0  | 8 NOT NAMED | 19.9 | 52.9 | 65 | 0 |
| 1933 | 8 18 | 6  | 8 NOT NAMED | 20.6 | 53.4 | 70 | 0 |
| 1933 | 8 18 | 12 | 8 NOT NAMED | 21.3 | 54.3 | 75 | 0 |
| 1933 | 8 18 | 18 | 8 NOT NAMED | 22.1 | 55.3 | 75 | 0 |

|      |      |    |             |      |      |     |     |
|------|------|----|-------------|------|------|-----|-----|
| 1933 | 8 19 | 0  | 8 NOT NAMED | 23.0 | 56.4 | 80  | 0   |
| 1933 | 8 19 | 6  | 8 NOT NAMED | 24.0 | 57.7 | 80  | 0   |
| 1933 | 8 19 | 12 | 8 NOT NAMED | 25.0 | 59.0 | 85  | 0   |
| 1933 | 8 19 | 18 | 8 NOT NAMED | 25.9 | 60.0 | 85  | 0   |
| 1933 | 8 20 | 0  | 8 NOT NAMED | 26.8 | 61.0 | 85  | 0   |
| 1933 | 8 20 | 6  | 8 NOT NAMED | 27.9 | 62.0 | 85  | 0   |
| 1933 | 8 20 | 12 | 8 NOT NAMED | 28.9 | 63.0 | 85  | 0   |
| 1933 | 8 20 | 18 | 8 NOT NAMED | 29.5 | 63.7 | 85  | 0   |
| 1933 | 8 21 | 0  | 8 NOT NAMED | 30.1 | 64.2 | 85  | 0   |
| 1933 | 8 21 | 6  | 8 NOT NAMED | 30.6 | 64.9 | 90  | 0   |
| 1933 | 8 21 | 12 | 8 NOT NAMED | 31.2 | 65.7 | 90  | 0   |
| 1933 | 8 21 | 18 | 8 NOT NAMED | 32.1 | 67.1 | 90  | 0   |
| 1933 | 8 22 | 0  | 8 NOT NAMED | 32.6 | 68.9 | 95  | 0   |
| 1933 | 8 22 | 6  | 8 NOT NAMED | 32.8 | 70.0 | 100 | 0   |
| 1933 | 8 22 | 12 | 8 NOT NAMED | 33.1 | 71.1 | 105 | 0   |
| 1933 | 8 22 | 18 | 8 NOT NAMED | 33.8 | 72.6 | 100 | 0   |
| 1933 | 8 23 | 0  | 8 NOT NAMED | 34.5 | 74.0 | 85  | 0   |
| 1933 | 8 23 | 6  | 8 NOT NAMED | 35.2 | 75.0 | 70  | 0   |
| 1933 | 8 23 | 12 | 8 NOT NAMED | 36.0 | 75.8 | 60  | 971 |
| 1933 | 8 23 | 18 | 8 NOT NAMED | 37.2 | 76.6 | 50  | 0   |
| 1933 | 8 24 | 0  | 8 NOT NAMED | 38.7 | 77.1 | 45  | 0   |
| 1933 | 8 24 | 6  | 8 NOT NAMED | 40.6 | 77.0 | 45  | 0   |
| 1933 | 8 24 | 12 | 8 NOT NAMED | 42.4 | 76.3 | 40  | 0   |
| 1933 | 8 24 | 18 | 8 NOT NAMED | 43.4 | 75.3 | 35  | 0   |
| 1933 | 8 25 | 0  | 8 NOT NAMED | 44.1 | 74.4 | 35  | 0   |
| 1933 | 8 25 | 6  | 8 NOT NAMED | 44.6 | 73.7 | 30  | 0   |
| 1933 | 8 25 | 12 | 8 NOT NAMED | 45.2 | 73.0 | 30  | 0   |
| 1933 | 8 25 | 18 | 8 NOT NAMED | 45.6 | 72.3 | 25  | 0   |
| 1933 | 8 26 | 0  | 8 NOT NAMED | 46.3 | 71.2 | 25  | 0   |
| 1933 | 8 26 | 6  | 8 NOT NAMED | 47.3 | 69.7 | 20  | 0   |
| 1933 | 8 26 | 12 | 8 NOT NAMED | 48.2 | 68.2 | 20  | 0   |
| 1933 | 8 26 | 18 | 8 NOT NAMED | 50.0 | 65.7 | 20  | 0   |
| 1933 | 8 24 | 6  | 9 NOT NAMED | 20.0 | 59.5 | 35  | 0   |
| 1933 | 8 24 | 12 | 9 NOT NAMED | 21.6 | 61.5 | 35  | 0   |
| 1933 | 8 24 | 18 | 9 NOT NAMED | 22.3 | 62.5 | 35  | 0   |
| 1933 | 8 25 | 0  | 9 NOT NAMED | 23.0 | 63.3 | 35  | 0   |
| 1933 | 8 25 | 6  | 9 NOT NAMED | 23.7 | 64.2 | 35  | 0   |
| 1933 | 8 25 | 12 | 9 NOT NAMED | 24.3 | 65.0 | 35  | 0   |
| 1933 | 8 25 | 18 | 9 NOT NAMED | 24.9 | 65.7 | 35  | 0   |
| 1933 | 8 26 | 0  | 9 NOT NAMED | 25.5 | 66.4 | 35  | 0   |
| 1933 | 8 26 | 6  | 9 NOT NAMED | 26.1 | 67.1 | 35  | 0   |
| 1933 | 8 26 | 12 | 9 NOT NAMED | 26.8 | 67.8 | 35  | 0   |
| 1933 | 8 26 | 18 | 9 NOT NAMED | 27.4 | 68.4 | 40  | 0   |
| 1933 | 8 27 | 0  | 9 NOT NAMED | 28.2 | 69.0 | 40  | 0   |

|      |      |       |             |      |      |    |   |
|------|------|-------|-------------|------|------|----|---|
| 1933 | 8 27 | 6     | 9 NOT NAMED | 29.2 | 69.5 | 40 | 0 |
| 1933 | 8 27 | 12    | 9 NOT NAMED | 30.2 | 69.8 | 40 | 0 |
| 1933 | 8 27 | 18    | 9 NOT NAMED | 31.2 | 69.5 | 40 | 0 |
| 1933 | 8 28 | 0     | 9 NOT NAMED | 32.2 | 68.8 | 45 | 0 |
| 1933 | 8 28 | 6     | 9 NOT NAMED | 33.0 | 68.1 | 45 | 0 |
| 1933 | 8 28 | 12    | 9 NOT NAMED | 33.8 | 67.2 | 45 | 0 |
| 1933 | 8 28 | 18    | 9 NOT NAMED | 35.4 | 65.7 | 45 | 0 |
| 1933 | 8 29 | 0     | 9 NOT NAMED | 37.1 | 64.0 | 45 | 0 |
| 1933 | 8 29 | 6     | 9 NOT NAMED | 38.3 | 62.7 | 40 | 0 |
| 1933 | 8 29 | 12    | 9 NOT NAMED | 39.5 | 61.4 | 40 | 0 |
| 1933 | 8 29 | 18    | 9 NOT NAMED | 41.0 | 59.5 | 35 | 0 |
| 1933 | 8 30 | 0     | 9 NOT NAMED | 42.6 | 57.1 | 35 | 0 |
| 1933 | 8 30 | 6     | 9 NOT NAMED | 44.0 | 54.2 | 35 | 0 |
| 1933 | 8 30 | 12    | 9 NOT NAMED | 45.2 | 51.3 | 35 | 0 |
| 1933 | 8 30 | 18    | 9 NOT NAMED | 46.1 | 48.7 | 35 | 0 |
| 1933 | 8 31 | 0     | 9 NOT NAMED | 46.8 | 46.0 | 35 | 0 |
| 1933 | 8 31 | 6     | 9 NOT NAMED | 47.3 | 43.0 | 35 | 0 |
| 1933 | 8 31 | 12    | 9 NOT NAMED | 47.8 | 40.0 | 35 | 0 |
| 1933 | 8 31 | 18    | 9 NOT NAMED | 49.0 | 37.0 | 35 | 0 |
| 1933 | 8 26 | 18 10 | NOT NAMED   | 18.6 | 93.8 | 35 | 0 |
| 1933 | 8 27 | 0 10  | NOT NAMED   | 18.9 | 93.9 | 35 | 0 |
| 1933 | 8 27 | 6 10  | NOT NAMED   | 19.4 | 94.1 | 35 | 0 |
| 1933 | 8 27 | 12 10 | NOT NAMED   | 20.0 | 94.2 | 35 | 0 |
| 1933 | 8 27 | 18 10 | NOT NAMED   | 20.5 | 94.4 | 35 | 0 |
| 1933 | 8 28 | 0 10  | NOT NAMED   | 20.8 | 94.6 | 35 | 0 |
| 1933 | 8 28 | 6 10  | NOT NAMED   | 21.1 | 94.8 | 35 | 0 |
| 1933 | 8 28 | 12 10 | NOT NAMED   | 21.4 | 94.9 | 35 | 0 |
| 1933 | 8 28 | 18 10 | NOT NAMED   | 21.9 | 95.4 | 35 | 0 |
| 1933 | 8 29 | 0 10  | NOT NAMED   | 22.2 | 96.1 | 35 | 0 |
| 1933 | 8 29 | 6 10  | NOT NAMED   | 22.2 | 96.7 | 35 | 0 |
| 1933 | 8 29 | 12 10 | NOT NAMED   | 22.0 | 97.4 | 35 | 0 |
| 1933 | 8 29 | 18 10 | NOT NAMED   | 20.5 | 98.3 | 30 | 0 |
| 1933 | 8 28 | 6 11  | NOT NAMED   | 18.4 | 52.4 | 35 | 0 |
| 1933 | 8 28 | 12 11 | NOT NAMED   | 18.4 | 55.3 | 35 | 0 |
| 1933 | 8 28 | 18 11 | NOT NAMED   | 18.5 | 57.1 | 35 | 0 |
| 1933 | 8 29 | 0 11  | NOT NAMED   | 18.7 | 59.2 | 35 | 0 |
| 1933 | 8 29 | 6 11  | NOT NAMED   | 18.9 | 61.3 | 40 | 0 |
| 1933 | 8 29 | 12 11 | NOT NAMED   | 19.2 | 63.4 | 45 | 0 |
| 1933 | 8 29 | 18 11 | NOT NAMED   | 19.9 | 64.9 | 50 | 0 |
| 1933 | 8 30 | 0 11  | NOT NAMED   | 20.7 | 66.2 | 50 | 0 |
| 1933 | 8 30 | 6 11  | NOT NAMED   | 21.3 | 68.0 | 55 | 0 |
| 1933 | 8 30 | 12 11 | NOT NAMED   | 21.7 | 69.6 | 60 | 0 |
| 1933 | 8 30 | 18 11 | NOT NAMED   | 21.9 | 70.5 | 65 | 0 |
| 1933 | 8 31 | 0 11  | NOT NAMED   | 22.1 | 71.3 | 70 | 0 |

|      |   |    |    |    |           |      |      |     |     |
|------|---|----|----|----|-----------|------|------|-----|-----|
| 1933 | 8 | 31 | 6  | 11 | NOT NAMED | 22.3 | 72.3 | 70  | 0   |
| 1933 | 8 | 31 | 12 | 11 | NOT NAMED | 22.4 | 73.5 | 75  | 0   |
| 1933 | 8 | 31 | 18 | 11 | NOT NAMED | 22.6 | 75.4 | 75  | 0   |
| 1933 | 9 | 1  | 0  | 11 | NOT NAMED | 22.8 | 77.3 | 80  | 0   |
| 1933 | 9 | 1  | 6  | 11 | NOT NAMED | 23.1 | 78.9 | 80  | 0   |
| 1933 | 9 | 1  | 12 | 11 | NOT NAMED | 23.5 | 80.4 | 85  | 0   |
| 1933 | 9 | 1  | 18 | 11 | NOT NAMED | 23.8 | 81.9 | 90  | 0   |
| 1933 | 9 | 2  | 0  | 11 | NOT NAMED | 24.0 | 83.2 | 90  | 0   |
| 1933 | 9 | 2  | 6  | 11 | NOT NAMED | 24.2 | 84.3 | 95  | 0   |
| 1933 | 9 | 2  | 12 | 11 | NOT NAMED | 24.4 | 85.4 | 100 | 0   |
| 1933 | 9 | 2  | 18 | 11 | NOT NAMED | 24.6 | 86.4 | 100 | 0   |
| 1933 | 9 | 3  | 0  | 11 | NOT NAMED | 24.8 | 87.5 | 105 | 0   |
| 1933 | 9 | 3  | 6  | 11 | NOT NAMED | 25.0 | 88.7 | 105 | 0   |
| 1933 | 9 | 3  | 12 | 11 | NOT NAMED | 25.3 | 89.9 | 110 | 0   |
| 1933 | 9 | 3  | 18 | 11 | NOT NAMED | 25.6 | 91.2 | 110 | 0   |
| 1933 | 9 | 4  | 0  | 11 | NOT NAMED | 25.9 | 92.4 | 110 | 0   |
| 1933 | 9 | 4  | 6  | 11 | NOT NAMED | 26.0 | 93.7 | 110 | 0   |
| 1933 | 9 | 4  | 12 | 11 | NOT NAMED | 26.1 | 94.9 | 105 | 0   |
| 1933 | 9 | 4  | 18 | 11 | NOT NAMED | 26.2 | 95.8 | 95  | 0   |
| 1933 | 9 | 5  | 0  | 11 | NOT NAMED | 26.2 | 96.6 | 85  | 0   |
| 1933 | 9 | 5  | 6  | 11 | NOT NAMED | 26.1 | 97.5 | 80  | 0   |
| 1933 | 9 | 5  | 12 | 11 | NOT NAMED | 25.9 | 98.4 | 60  | 0   |
| 1933 | 9 | 5  | 18 | 11 | NOT NAMED | 25.7 | 99.3 | 35  | 0   |
| 1933 | 8 | 31 | 6  | 12 | NOT NAMED | 19.2 | 56.2 | 45  | 0   |
| 1933 | 8 | 31 | 12 | 12 | NOT NAMED | 19.5 | 58.7 | 70  | 0   |
| 1933 | 8 | 31 | 18 | 12 | NOT NAMED | 19.5 | 60.2 | 80  | 0   |
| 1933 | 9 | 1  | 0  | 12 | NOT NAMED | 19.6 | 61.8 | 90  | 0   |
| 1933 | 9 | 1  | 6  | 12 | NOT NAMED | 19.7 | 63.6 | 95  | 0   |
| 1933 | 9 | 1  | 12 | 12 | NOT NAMED | 19.8 | 65.4 | 100 | 0   |
| 1933 | 9 | 1  | 18 | 12 | NOT NAMED | 20.8 | 67.2 | 105 | 0   |
| 1933 | 9 | 2  | 0  | 12 | NOT NAMED | 22.0 | 69.0 | 110 | 0   |
| 1933 | 9 | 2  | 6  | 12 | NOT NAMED | 22.5 | 70.0 | 115 | 0   |
| 1933 | 9 | 2  | 12 | 12 | NOT NAMED | 23.1 | 71.1 | 115 | 0   |
| 1933 | 9 | 2  | 18 | 12 | NOT NAMED | 23.6 | 72.4 | 120 | 0   |
| 1933 | 9 | 3  | 0  | 12 | NOT NAMED | 24.2 | 73.8 | 120 | 0   |
| 1933 | 9 | 3  | 6  | 12 | NOT NAMED | 24.8 | 75.4 | 120 | 0   |
| 1933 | 9 | 3  | 12 | 12 | NOT NAMED | 25.4 | 77.0 | 120 | 0   |
| 1933 | 9 | 3  | 18 | 12 | NOT NAMED | 25.8 | 78.0 | 120 | 0   |
| 1933 | 9 | 4  | 0  | 12 | NOT NAMED | 26.2 | 78.8 | 115 | 0   |
| 1933 | 9 | 4  | 6  | 12 | NOT NAMED | 27.0 | 80.4 | 110 | 948 |
| 1933 | 9 | 4  | 12 | 12 | NOT NAMED | 27.9 | 81.7 | 55  | 0   |
| 1933 | 9 | 4  | 18 | 12 | NOT NAMED | 28.3 | 82.3 | 50  | 0   |
| 1933 | 9 | 5  | 0  | 12 | NOT NAMED | 28.7 | 82.7 | 45  | 0   |
| 1933 | 9 | 5  | 6  | 12 | NOT NAMED | 29.4 | 83.1 | 45  | 0   |

|      |   |    |    |    |           |      |      |     |     |
|------|---|----|----|----|-----------|------|------|-----|-----|
| 1933 | 9 | 5  | 12 | 12 | NOT NAMED | 30.0 | 83.4 | 45  | 0   |
| 1933 | 9 | 5  | 18 | 12 | NOT NAMED | 30.5 | 83.5 | 40  | 0   |
| 1933 | 9 | 6  | 0  | 12 | NOT NAMED | 30.9 | 83.5 | 40  | 0   |
| 1933 | 9 | 6  | 6  | 12 | NOT NAMED | 31.4 | 83.4 | 35  | 0   |
| 1933 | 9 | 6  | 12 | 12 | NOT NAMED | 31.9 | 83.3 | 35  | 0   |
| 1933 | 9 | 6  | 18 | 12 | NOT NAMED | 32.3 | 83.2 | 30  | 0   |
| 1933 | 9 | 7  | 0  | 12 | NOT NAMED | 32.7 | 83.0 | 25  | 0   |
| 1933 | 9 | 7  | 6  | 12 | NOT NAMED | 33.1 | 82.8 | 20  | 0   |
| 1933 | 9 | 7  | 12 | 12 | NOT NAMED | 33.5 | 82.6 | 20  | 0   |
| 1933 | 9 | 7  | 18 | 12 | NOT NAMED | 33.9 | 82.4 | 15  | 0   |
| 1933 | 9 | 8  | 12 | 13 | NOT NAMED | 15.9 | 58.2 | 35  | 0   |
| 1933 | 9 | 8  | 18 | 13 | NOT NAMED | 16.5 | 57.8 | 35  | 0   |
| 1933 | 9 | 9  | 0  | 13 | NOT NAMED | 17.1 | 57.6 | 40  | 0   |
| 1933 | 9 | 9  | 6  | 13 | NOT NAMED | 17.6 | 57.5 | 45  | 0   |
| 1933 | 9 | 9  | 12 | 13 | NOT NAMED | 18.0 | 57.5 | 50  | 0   |
| 1933 | 9 | 9  | 18 | 13 | NOT NAMED | 18.5 | 57.6 | 55  | 0   |
| 1933 | 9 | 10 | 0  | 13 | NOT NAMED | 19.0 | 57.8 | 60  | 0   |
| 1933 | 9 | 10 | 6  | 13 | NOT NAMED | 19.6 | 58.0 | 65  | 0   |
| 1933 | 9 | 10 | 12 | 13 | NOT NAMED | 20.2 | 58.5 | 70  | 0   |
| 1933 | 9 | 10 | 18 | 13 | NOT NAMED | 21.0 | 59.2 | 75  | 0   |
| 1933 | 9 | 11 | 0  | 13 | NOT NAMED | 21.7 | 59.8 | 80  | 0   |
| 1933 | 9 | 11 | 6  | 13 | NOT NAMED | 22.3 | 60.5 | 85  | 0   |
| 1933 | 9 | 11 | 12 | 13 | NOT NAMED | 22.9 | 61.0 | 85  | 0   |
| 1933 | 9 | 11 | 18 | 13 | NOT NAMED | 23.5 | 61.6 | 90  | 0   |
| 1933 | 9 | 12 | 0  | 13 | NOT NAMED | 24.0 | 62.3 | 95  | 0   |
| 1933 | 9 | 12 | 6  | 13 | NOT NAMED | 24.4 | 62.8 | 95  | 0   |
| 1933 | 9 | 12 | 12 | 13 | NOT NAMED | 24.8 | 63.3 | 95  | 0   |
| 1933 | 9 | 12 | 18 | 13 | NOT NAMED | 25.5 | 64.4 | 95  | 0   |
| 1933 | 9 | 13 | 0  | 13 | NOT NAMED | 26.2 | 65.6 | 95  | 0   |
| 1933 | 9 | 13 | 6  | 13 | NOT NAMED | 26.6 | 66.4 | 95  | 0   |
| 1933 | 9 | 13 | 12 | 13 | NOT NAMED | 27.0 | 67.3 | 95  | 0   |
| 1933 | 9 | 13 | 18 | 13 | NOT NAMED | 27.5 | 68.7 | 95  | 0   |
| 1933 | 9 | 14 | 0  | 13 | NOT NAMED | 28.1 | 70.1 | 95  | 0   |
| 1933 | 9 | 14 | 6  | 13 | NOT NAMED | 28.6 | 71.1 | 95  | 0   |
| 1933 | 9 | 14 | 12 | 13 | NOT NAMED | 29.1 | 72.1 | 100 | 0   |
| 1933 | 9 | 14 | 18 | 13 | NOT NAMED | 29.9 | 73.2 | 100 | 0   |
| 1933 | 9 | 15 | 0  | 13 | NOT NAMED | 30.8 | 74.0 | 100 | 0   |
| 1933 | 9 | 15 | 6  | 13 | NOT NAMED | 31.4 | 74.5 | 105 | 0   |
| 1933 | 9 | 15 | 12 | 13 | NOT NAMED | 32.0 | 75.0 | 105 | 0   |
| 1933 | 9 | 15 | 18 | 13 | NOT NAMED | 32.7 | 75.5 | 105 | 0   |
| 1933 | 9 | 16 | 0  | 13 | NOT NAMED | 33.5 | 76.0 | 105 | 0   |
| 1933 | 9 | 16 | 6  | 13 | NOT NAMED | 34.3 | 76.2 | 90  | 0   |
| 1933 | 9 | 16 | 12 | 13 | NOT NAMED | 35.1 | 76.0 | 80  | 957 |
| 1933 | 9 | 16 | 18 | 13 | NOT NAMED | 36.3 | 75.0 | 75  | 0   |

|      |      |       |           |      |      |    |     |
|------|------|-------|-----------|------|------|----|-----|
| 1933 | 9 17 | 0 13  | NOT NAMED | 37.6 | 73.8 | 75 | 0   |
| 1933 | 9 17 | 6 13  | NOT NAMED | 38.2 | 73.1 | 70 | 0   |
| 1933 | 9 17 | 12 13 | NOT NAMED | 38.9 | 72.1 | 70 | 0   |
| 1933 | 9 17 | 18 13 | NOT NAMED | 40.2 | 70.2 | 70 | 0   |
| 1933 | 9 18 | 0 13  | NOT NAMED | 41.8 | 67.7 | 65 | 0   |
| 1933 | 9 18 | 6 13  | NOT NAMED | 43.5 | 65.2 | 60 | 0   |
| 1933 | 9 18 | 12 13 | NOT NAMED | 45.2 | 62.8 | 60 | 0   |
| 1933 | 9 18 | 18 13 | NOT NAMED | 46.7 | 61.1 | 55 | 0   |
| 1933 | 9 19 | 0 13  | NOT NAMED | 48.1 | 59.8 | 55 | 0   |
| 1933 | 9 19 | 6 13  | NOT NAMED | 49.3 | 58.7 | 55 | 0   |
| 1933 | 9 19 | 12 13 | NOT NAMED | 50.4 | 57.6 | 50 | 0   |
| 1933 | 9 19 | 18 13 | NOT NAMED | 51.6 | 56.5 | 50 | 0   |
| 1933 | 9 20 | 0 13  | NOT NAMED | 52.8 | 55.4 | 50 | 0   |
| 1933 | 9 20 | 6 13  | NOT NAMED | 53.7 | 54.3 | 45 | 0   |
| 1933 | 9 20 | 12 13 | NOT NAMED | 54.6 | 53.0 | 45 | 0   |
| 1933 | 9 20 | 18 13 | NOT NAMED | 55.9 | 50.8 | 40 | 0   |
| 1933 | 9 21 | 0 13  | NOT NAMED | 57.2 | 48.2 | 40 | 0   |
| 1933 | 9 21 | 6 13  | NOT NAMED | 58.2 | 46.0 | 40 | 0   |
| 1933 | 9 21 | 12 13 | NOT NAMED | 59.2 | 43.8 | 40 | 0   |
| 1933 | 9 21 | 18 13 | NOT NAMED | 60.2 | 41.6 | 40 | 0   |
| 1933 | 9 10 | 18 14 | NOT NAMED | 16.0 | 87.6 | 35 | 0   |
| 1933 | 9 11 | 0 14  | NOT NAMED | 16.3 | 87.5 | 35 | 0   |
| 1933 | 9 11 | 6 14  | NOT NAMED | 16.6 | 87.4 | 40 | 0   |
| 1933 | 9 11 | 12 14 | NOT NAMED | 16.9 | 87.4 | 45 | 0   |
| 1933 | 9 11 | 18 14 | NOT NAMED | 17.1 | 87.4 | 50 | 0   |
| 1933 | 9 12 | 0 14  | NOT NAMED | 17.3 | 87.4 | 55 | 0   |
| 1933 | 9 12 | 6 14  | NOT NAMED | 17.5 | 87.4 | 60 | 0   |
| 1933 | 9 12 | 12 14 | NOT NAMED | 17.8 | 87.5 | 65 | 0   |
| 1933 | 9 12 | 18 14 | NOT NAMED | 18.0 | 87.6 | 70 | 0   |
| 1933 | 9 13 | 0 14  | NOT NAMED | 18.3 | 87.7 | 70 | 0   |
| 1933 | 9 13 | 6 14  | NOT NAMED | 18.5 | 87.8 | 70 | 0   |
| 1933 | 9 13 | 12 14 | NOT NAMED | 18.7 | 88.0 | 60 | 0   |
| 1933 | 9 13 | 18 14 | NOT NAMED | 19.2 | 88.7 | 55 | 0   |
| 1933 | 9 14 | 0 14  | NOT NAMED | 19.8 | 89.6 | 50 | 0   |
| 1933 | 9 14 | 6 14  | NOT NAMED | 20.3 | 90.5 | 55 | 0   |
| 1933 | 9 14 | 12 14 | NOT NAMED | 20.8 | 91.5 | 60 | 0   |
| 1933 | 9 14 | 18 14 | NOT NAMED | 21.5 | 92.9 | 65 | 0   |
| 1933 | 9 15 | 0 14  | NOT NAMED | 22.1 | 94.4 | 75 | 0   |
| 1933 | 9 15 | 6 14  | NOT NAMED | 22.5 | 95.9 | 75 | 0   |
| 1933 | 9 15 | 12 14 | NOT NAMED | 22.4 | 97.5 | 65 | 960 |
| 1933 | 9 15 | 18 14 | NOT NAMED | 20.5 | 99.1 | 35 | 0   |
| 1933 | 9 16 | 6 15  | NOT NAMED | 11.0 | 54.7 | 35 | 0   |
| 1933 | 9 16 | 12 15 | NOT NAMED | 12.1 | 58.1 | 35 | 0   |
| 1933 | 9 16 | 18 15 | NOT NAMED | 12.2 | 59.3 | 35 | 0   |

|      |      |       |           |      |       |    |     |
|------|------|-------|-----------|------|-------|----|-----|
| 1933 | 9 17 | 0 15  | NOT NAMED | 12.4 | 60.4  | 40 | 0   |
| 1933 | 9 17 | 6 15  | NOT NAMED | 12.5 | 61.5  | 40 | 0   |
| 1933 | 9 17 | 12 15 | NOT NAMED | 12.8 | 62.6  | 40 | 0   |
| 1933 | 9 17 | 18 15 | NOT NAMED | 13.1 | 63.9  | 45 | 0   |
| 1933 | 9 18 | 0 15  | NOT NAMED | 13.4 | 65.1  | 45 | 0   |
| 1933 | 9 18 | 6 15  | NOT NAMED | 13.6 | 66.3  | 45 | 0   |
| 1933 | 9 18 | 12 15 | NOT NAMED | 13.9 | 67.6  | 50 | 0   |
| 1933 | 9 18 | 18 15 | NOT NAMED | 14.4 | 68.9  | 50 | 0   |
| 1933 | 9 19 | 0 15  | NOT NAMED | 14.9 | 70.3  | 55 | 0   |
| 1933 | 9 19 | 6 15  | NOT NAMED | 15.3 | 71.5  | 55 | 0   |
| 1933 | 9 19 | 12 15 | NOT NAMED | 15.6 | 72.7  | 60 | 0   |
| 1933 | 9 19 | 18 15 | NOT NAMED | 15.8 | 74.5  | 60 | 0   |
| 1933 | 9 20 | 0 15  | NOT NAMED | 16.1 | 76.5  | 60 | 0   |
| 1933 | 9 20 | 6 15  | NOT NAMED | 16.7 | 78.0  | 65 | 0   |
| 1933 | 9 20 | 12 15 | NOT NAMED | 17.4 | 79.5  | 70 | 0   |
| 1933 | 9 20 | 18 15 | NOT NAMED | 18.1 | 81.2  | 70 | 0   |
| 1933 | 9 21 | 0 15  | NOT NAMED | 18.8 | 82.9  | 75 | 0   |
| 1933 | 9 21 | 6 15  | NOT NAMED | 19.3 | 84.3  | 80 | 0   |
| 1933 | 9 21 | 12 15 | NOT NAMED | 19.6 | 85.2  | 80 | 0   |
| 1933 | 9 21 | 18 15 | NOT NAMED | 19.9 | 85.8  | 85 | 0   |
| 1933 | 9 22 | 0 15  | NOT NAMED | 20.0 | 86.3  | 90 | 0   |
| 1933 | 9 22 | 6 15  | NOT NAMED | 20.2 | 86.9  | 90 | 0   |
| 1933 | 9 22 | 12 15 | NOT NAMED | 20.5 | 87.6  | 90 | 0   |
| 1933 | 9 22 | 18 15 | NOT NAMED | 20.9 | 89.2  | 85 | 0   |
| 1933 | 9 23 | 0 15  | NOT NAMED | 21.2 | 90.8  | 75 | 0   |
| 1933 | 9 23 | 6 15  | NOT NAMED | 21.2 | 91.4  | 80 | 0   |
| 1933 | 9 23 | 12 15 | NOT NAMED | 21.3 | 92.0  | 80 | 0   |
| 1933 | 9 23 | 18 15 | NOT NAMED | 21.5 | 93.0  | 85 | 0   |
| 1933 | 9 24 | 0 15  | NOT NAMED | 21.6 | 94.0  | 90 | 0   |
| 1933 | 9 24 | 6 15  | NOT NAMED | 21.7 | 94.8  | 90 | 0   |
| 1933 | 9 24 | 12 15 | NOT NAMED | 21.8 | 95.7  | 95 | 0   |
| 1933 | 9 24 | 18 15 | NOT NAMED | 22.0 | 96.8  | 95 | 962 |
| 1933 | 9 25 | 0 15  | NOT NAMED | 22.2 | 97.8  | 65 | 0   |
| 1933 | 9 25 | 6 15  | NOT NAMED | 22.8 | 100.5 | 35 | 0   |
| 1933 | 9 27 | 6 16  | NOT NAMED | 17.5 | 58.3  | 35 | 0   |
| 1933 | 9 27 | 12 16 | NOT NAMED | 17.5 | 60.1  | 35 | 0   |
| 1933 | 9 27 | 18 16 | NOT NAMED | 17.6 | 61.7  | 35 | 0   |
| 1933 | 9 28 | 0 16  | NOT NAMED | 17.7 | 63.3  | 40 | 0   |
| 1933 | 9 28 | 6 16  | NOT NAMED | 17.7 | 65.0  | 40 | 0   |
| 1933 | 9 28 | 12 16 | NOT NAMED | 17.6 | 66.7  | 40 | 0   |
| 1933 | 9 28 | 18 16 | NOT NAMED | 17.6 | 68.3  | 40 | 0   |
| 1933 | 9 29 | 0 16  | NOT NAMED | 17.6 | 69.9  | 40 | 0   |
| 1933 | 9 29 | 6 16  | NOT NAMED | 17.8 | 71.3  | 40 | 0   |
| 1933 | 9 29 | 12 16 | NOT NAMED | 18.0 | 72.6  | 40 | 0   |



|      |    |    |    |    |           |      |      |     |     |
|------|----|----|----|----|-----------|------|------|-----|-----|
| 1933 | 9  | 29 | 18 | 16 | NOT NAMED | 18.3 | 73.5 | 35  | 0   |
| 1933 | 9  | 30 | 0  | 16 | NOT NAMED | 18.6 | 73.7 | 35  | 0   |
| 1933 | 9  | 30 | 6  | 16 | NOT NAMED | 19.0 | 73.3 | 30  | 0   |
| 1933 | 9  | 30 | 12 | 16 | NOT NAMED | 19.4 | 73.0 | 30  | 0   |
| 1933 | 9  | 30 | 18 | 16 | NOT NAMED | 20.1 | 71.5 | 25  | 0   |
| 1933 | 9  | 28 | 6  | 17 | NOT NAMED | 11.7 | 82.1 | 35  | 0   |
| 1933 | 9  | 28 | 12 | 17 | NOT NAMED | 12.6 | 82.2 | 35  | 0   |
| 1933 | 9  | 28 | 18 | 17 | NOT NAMED | 13.4 | 82.3 | 35  | 0   |
| 1933 | 9  | 29 | 0  | 17 | NOT NAMED | 14.3 | 82.6 | 35  | 0   |
| 1933 | 9  | 29 | 6  | 17 | NOT NAMED | 15.6 | 83.6 | 35  | 0   |
| 1933 | 9  | 29 | 12 | 17 | NOT NAMED | 16.3 | 84.8 | 35  | 0   |
| 1933 | 9  | 29 | 18 | 17 | NOT NAMED | 16.4 | 85.4 | 35  | 0   |
| 1933 | 9  | 30 | 0  | 17 | NOT NAMED | 16.5 | 86.2 | 35  | 0   |
| 1933 | 9  | 30 | 6  | 17 | NOT NAMED | 16.7 | 87.3 | 35  | 0   |
| 1933 | 9  | 30 | 12 | 17 | NOT NAMED | 16.8 | 88.5 | 35  | 0   |
| 1933 | 9  | 30 | 18 | 17 | NOT NAMED | 16.9 | 90.0 | 30  | 0   |
| 1933 | 10 | 1  | 6  | 18 | NOT NAMED | 10.4 | 80.3 | 35  | 0   |
| 1933 | 10 | 1  | 12 | 18 | NOT NAMED | 12.2 | 80.1 | 35  | 0   |
| 1933 | 10 | 1  | 18 | 18 | NOT NAMED | 13.5 | 80.2 | 35  | 0   |
| 1933 | 10 | 2  | 0  | 18 | NOT NAMED | 14.7 | 80.2 | 40  | 0   |
| 1933 | 10 | 2  | 6  | 18 | NOT NAMED | 15.9 | 80.3 | 45  | 0   |
| 1933 | 10 | 2  | 12 | 18 | NOT NAMED | 17.0 | 80.3 | 50  | 0   |
| 1933 | 10 | 2  | 18 | 18 | NOT NAMED | 17.7 | 80.3 | 55  | 0   |
| 1933 | 10 | 3  | 0  | 18 | NOT NAMED | 18.4 | 80.4 | 65  | 0   |
| 1933 | 10 | 3  | 6  | 18 | NOT NAMED | 19.3 | 80.5 | 70  | 0   |
| 1933 | 10 | 3  | 12 | 18 | NOT NAMED | 20.1 | 80.8 | 75  | 0   |
| 1933 | 10 | 3  | 18 | 18 | NOT NAMED | 20.7 | 81.1 | 80  | 0   |
| 1933 | 10 | 4  | 0  | 18 | NOT NAMED | 21.3 | 81.4 | 85  | 0   |
| 1933 | 10 | 4  | 6  | 18 | NOT NAMED | 22.0 | 81.7 | 90  | 0   |
| 1933 | 10 | 4  | 12 | 18 | NOT NAMED | 22.7 | 82.1 | 95  | 0   |
| 1933 | 10 | 4  | 18 | 18 | NOT NAMED | 23.2 | 82.3 | 90  | 976 |
| 1933 | 10 | 5  | 0  | 18 | NOT NAMED | 23.6 | 82.0 | 95  | 0   |
| 1933 | 10 | 5  | 6  | 18 | NOT NAMED | 24.3 | 81.0 | 105 | 0   |
| 1933 | 10 | 5  | 12 | 18 | NOT NAMED | 25.1 | 79.5 | 115 | 0   |
| 1933 | 10 | 5  | 18 | 18 | NOT NAMED | 26.1 | 77.8 | 125 | 0   |
| 1933 | 10 | 6  | 0  | 18 | NOT NAMED | 27.2 | 76.1 | 130 | 0   |
| 1933 | 10 | 6  | 6  | 18 | NOT NAMED | 28.3 | 74.6 | 125 | 0   |
| 1933 | 10 | 6  | 12 | 18 | NOT NAMED | 29.6 | 73.1 | 125 | 0   |
| 1933 | 10 | 6  | 18 | 18 | NOT NAMED | 31.5 | 71.2 | 120 | 0   |
| 1933 | 10 | 7  | 0  | 18 | NOT NAMED | 33.6 | 69.4 | 115 | 0   |
| 1933 | 10 | 7  | 6  | 18 | NOT NAMED | 35.3 | 68.0 | 110 | 0   |
| 1933 | 10 | 7  | 12 | 18 | NOT NAMED | 37.0 | 66.9 | 105 | 971 |
| 1933 | 10 | 7  | 18 | 18 | NOT NAMED | 39.4 | 65.9 | 100 | 0   |
| 1933 | 10 | 8  | 0  | 18 | NOT NAMED | 41.7 | 65.0 | 90  | 0   |

|      |    |    |    |    |           |      |      |    |   |
|------|----|----|----|----|-----------|------|------|----|---|
| 1933 | 10 | 8  | 6  | 18 | NOT NAMED | 43.1 | 64.0 | 85 | 0 |
| 1933 | 10 | 8  | 12 | 18 | NOT NAMED | 44.0 | 63.0 | 80 | 0 |
| 1933 | 10 | 8  | 18 | 18 | NOT NAMED | 44.5 | 62.1 | 75 | 0 |
| 1933 | 10 | 9  | 0  | 18 | NOT NAMED | 44.8 | 60.2 | 70 | 0 |
| 1933 | 10 | 9  | 6  | 18 | NOT NAMED | 44.0 | 54.8 | 65 | 0 |
| 1933 | 10 | 9  | 12 | 18 | NOT NAMED | 43.2 | 49.3 | 60 | 0 |
| 1933 | 10 | 9  | 18 | 18 | NOT NAMED | 42.4 | 43.8 | 60 | 0 |
| 1933 | 10 | 25 | 6  | 19 | NOT NAMED | 13.4 | 79.3 | 35 | 0 |
| 1933 | 10 | 25 | 12 | 19 | NOT NAMED | 13.8 | 79.7 | 35 | 0 |
| 1933 | 10 | 25 | 18 | 19 | NOT NAMED | 13.9 | 79.3 | 35 | 0 |
| 1933 | 10 | 26 | 0  | 19 | NOT NAMED | 14.0 | 78.8 | 35 | 0 |
| 1933 | 10 | 26 | 6  | 19 | NOT NAMED | 14.2 | 78.3 | 35 | 0 |
| 1933 | 10 | 26 | 12 | 19 | NOT NAMED | 14.5 | 77.7 | 35 | 0 |
| 1933 | 10 | 26 | 18 | 19 | NOT NAMED | 14.9 | 77.2 | 40 | 0 |
| 1933 | 10 | 27 | 0  | 19 | NOT NAMED | 15.2 | 76.9 | 40 | 0 |
| 1933 | 10 | 27 | 6  | 19 | NOT NAMED | 15.5 | 76.8 | 45 | 0 |
| 1933 | 10 | 27 | 12 | 19 | NOT NAMED | 15.8 | 76.8 | 45 | 0 |
| 1933 | 10 | 27 | 18 | 19 | NOT NAMED | 16.0 | 76.9 | 50 | 0 |
| 1933 | 10 | 28 | 0  | 19 | NOT NAMED | 16.3 | 77.1 | 50 | 0 |
| 1933 | 10 | 28 | 6  | 19 | NOT NAMED | 16.5 | 77.3 | 55 | 0 |
| 1933 | 10 | 28 | 12 | 19 | NOT NAMED | 16.8 | 77.4 | 55 | 0 |
| 1933 | 10 | 28 | 18 | 19 | NOT NAMED | 17.1 | 77.5 | 60 | 0 |
| 1933 | 10 | 29 | 0  | 19 | NOT NAMED | 17.4 | 77.7 | 65 | 0 |
| 1933 | 10 | 29 | 6  | 19 | NOT NAMED | 17.7 | 77.8 | 75 | 0 |
| 1933 | 10 | 29 | 12 | 19 | NOT NAMED | 17.8 | 77.9 | 85 | 0 |
| 1933 | 10 | 29 | 18 | 19 | NOT NAMED | 18.1 | 78.1 | 85 | 0 |
| 1933 | 10 | 30 | 0  | 19 | NOT NAMED | 18.5 | 78.0 | 70 | 0 |
| 1933 | 10 | 30 | 6  | 19 | NOT NAMED | 18.7 | 77.7 | 65 | 0 |
| 1933 | 10 | 30 | 12 | 19 | NOT NAMED | 18.9 | 77.5 | 65 | 0 |
| 1933 | 10 | 30 | 18 | 19 | NOT NAMED | 19.2 | 77.1 | 65 | 0 |
| 1933 | 10 | 31 | 0  | 19 | NOT NAMED | 19.4 | 76.8 | 65 | 0 |
| 1933 | 10 | 31 | 6  | 19 | NOT NAMED | 19.7 | 76.6 | 65 | 0 |
| 1933 | 10 | 31 | 12 | 19 | NOT NAMED | 19.9 | 76.4 | 60 | 0 |
| 1933 | 10 | 31 | 18 | 19 | NOT NAMED | 20.4 | 76.2 | 55 | 0 |
| 1933 | 11 | 1  | 0  | 19 | NOT NAMED | 20.9 | 76.1 | 55 | 0 |
| 1933 | 11 | 1  | 6  | 19 | NOT NAMED | 21.4 | 76.2 | 50 | 0 |
| 1933 | 11 | 1  | 12 | 19 | NOT NAMED | 21.7 | 76.3 | 50 | 0 |
| 1933 | 11 | 1  | 18 | 19 | NOT NAMED | 21.9 | 76.4 | 45 | 0 |
| 1933 | 11 | 2  | 0  | 19 | NOT NAMED | 22.0 | 76.5 | 45 | 0 |
| 1933 | 11 | 2  | 6  | 19 | NOT NAMED | 22.2 | 76.6 | 45 | 0 |
| 1933 | 11 | 2  | 12 | 19 | NOT NAMED | 22.4 | 76.8 | 40 | 0 |
| 1933 | 11 | 2  | 18 | 19 | NOT NAMED | 22.8 | 77.0 | 40 | 0 |
| 1933 | 11 | 3  | 0  | 19 | NOT NAMED | 23.2 | 77.2 | 40 | 0 |
| 1933 | 11 | 3  | 6  | 19 | NOT NAMED | 23.6 | 77.3 | 40 | 0 |

|            |         |           |      |      |    |   |
|------------|---------|-----------|------|------|----|---|
| 1933 11    | 3 12 19 | NOT NAMED | 24.1 | 77.2 | 35 | 0 |
| 1933 11    | 3 18 19 | NOT NAMED | 24.6 | 76.9 | 35 | 0 |
| 1933 11    | 4 0 19  | NOT NAMED | 25.0 | 76.4 | 35 | 0 |
| 1933 11    | 4 6 19  | NOT NAMED | 25.3 | 76.0 | 35 | 0 |
| 1933 11    | 4 12 19 | NOT NAMED | 25.5 | 75.5 | 35 | 0 |
| 1933 11    | 4 18 19 | NOT NAMED | 25.8 | 74.6 | 35 | 0 |
| 1933 11    | 5 0 19  | NOT NAMED | 26.1 | 73.6 | 35 | 0 |
| 1933 11    | 5 6 19  | NOT NAMED | 26.3 | 73.0 | 35 | 0 |
| 1933 11    | 5 12 19 | NOT NAMED | 26.4 | 72.3 | 35 | 0 |
| 1933 11    | 5 18 19 | NOT NAMED | 26.6 | 71.3 | 35 | 0 |
| 1933 11    | 6 0 19  | NOT NAMED | 26.9 | 70.3 | 35 | 0 |
| 1933 11    | 6 6 19  | NOT NAMED | 27.1 | 69.6 | 35 | 0 |
| 1933 11    | 6 12 19 | NOT NAMED | 27.3 | 68.9 | 35 | 0 |
| 1933 11    | 6 18 19 | NOT NAMED | 27.7 | 67.7 | 35 | 0 |
| 1933 11    | 7 0 19  | NOT NAMED | 28.4 | 65.8 | 35 | 0 |
| 1933 11    | 7 6 19  | NOT NAMED | 29.5 | 63.5 | 35 | 0 |
| 1933 11    | 7 12 19 | NOT NAMED | 30.5 | 61.3 | 35 | 0 |
| 1933 11    | 7 18 19 | NOT NAMED | 33.5 | 57.8 | 35 | 0 |
| 1933 10 26 | 6 20    | NOT NAMED | 25.0 | 74.1 | 35 | 0 |
| 1933 10 26 | 12 20   | NOT NAMED | 26.6 | 73.9 | 35 | 0 |
| 1933 10 26 | 18 20   | NOT NAMED | 27.8 | 73.7 | 35 | 0 |
| 1933 10 27 | 0 20    | NOT NAMED | 29.0 | 73.5 | 40 | 0 |
| 1933 10 27 | 6 20    | NOT NAMED | 30.0 | 73.3 | 40 | 0 |
| 1933 10 27 | 12 20   | NOT NAMED | 31.0 | 73.1 | 45 | 0 |
| 1933 10 27 | 18 20   | NOT NAMED | 32.7 | 72.5 | 50 | 0 |
| 1933 10 28 | 0 20    | NOT NAMED | 34.6 | 71.5 | 50 | 0 |
| 1933 10 28 | 6 20    | NOT NAMED | 35.8 | 70.3 | 55 | 0 |
| 1933 10 28 | 12 20   | NOT NAMED | 37.1 | 68.8 | 60 | 0 |
| 1933 10 28 | 18 20   | NOT NAMED | 39.2 | 66.6 | 60 | 0 |
| 1933 10 29 | 0 20    | NOT NAMED | 41.2 | 64.4 | 60 | 0 |
| 1933 10 29 | 6 20    | NOT NAMED | 42.5 | 62.9 | 60 | 0 |
| 1933 10 29 | 12 20   | NOT NAMED | 43.9 | 62.1 | 60 | 0 |
| 1933 10 29 | 18 20   | NOT NAMED | 45.4 | 62.0 | 55 | 0 |
| 1933 10 30 | 0 20    | NOT NAMED | 46.7 | 61.9 | 50 | 0 |
| 1933 10 30 | 6 20    | NOT NAMED | 47.8 | 61.9 | 45 | 0 |
| 1933 10 30 | 12 20   | NOT NAMED | 49.0 | 61.5 | 35 | 0 |
| 1933 10 30 | 18 20   | NOT NAMED | 50.0 | 61.5 | 35 | 0 |
| 1933 11 15 | 12 21   | NOT NAMED | 11.9 | 79.8 | 35 | 0 |
| 1933 11 15 | 18 21   | NOT NAMED | 11.9 | 80.6 | 35 | 0 |
| 1933 11 16 | 0 21    | NOT NAMED | 12.0 | 81.3 | 35 | 0 |
| 1933 11 16 | 6 21    | NOT NAMED | 12.0 | 81.8 | 35 | 0 |
| 1933 11 16 | 12 21   | NOT NAMED | 12.1 | 82.4 | 35 | 0 |
| 1933 11 16 | 18 21   | NOT NAMED | 12.1 | 83.2 | 35 | 0 |
| 1933 11 17 | 0 21    | NOT NAMED | 12.2 | 84.3 | 35 | 0 |

|      |    |    |    |    |           |      |      |    |   |
|------|----|----|----|----|-----------|------|------|----|---|
| 1933 | 11 | 17 | 6  | 21 | NOT NAMED | 12.3 | 85.2 | 30 | 0 |
| 1934 | 5  | 27 | 6  | 1  | NOT NAMED | 23.4 | 84.0 | 35 | 0 |
| 1934 | 5  | 27 | 12 | 1  | NOT NAMED | 24.2 | 82.9 | 35 | 0 |
| 1934 | 5  | 27 | 18 | 1  | NOT NAMED | 24.6 | 82.3 | 40 | 0 |
| 1934 | 5  | 28 | 0  | 1  | NOT NAMED | 25.6 | 81.6 | 40 | 0 |
| 1934 | 5  | 28 | 6  | 1  | NOT NAMED | 27.0 | 80.8 | 35 | 0 |
| 1934 | 5  | 28 | 12 | 1  | NOT NAMED | 28.4 | 80.0 | 40 | 0 |
| 1934 | 5  | 28 | 18 | 1  | NOT NAMED | 29.8 | 79.8 | 50 | 0 |
| 1934 | 5  | 29 | 0  | 1  | NOT NAMED | 31.2 | 80.2 | 50 | 0 |
| 1934 | 5  | 29 | 6  | 1  | NOT NAMED | 32.6 | 80.9 | 50 | 0 |
| 1934 | 5  | 29 | 12 | 1  | NOT NAMED | 33.6 | 81.5 | 35 | 0 |
| 1934 | 5  | 29 | 18 | 1  | NOT NAMED | 34.0 | 81.7 | 30 | 0 |
| 1934 | 5  | 30 | 0  | 1  | NOT NAMED | 34.3 | 81.9 | 30 | 0 |
| 1934 | 5  | 30 | 6  | 1  | NOT NAMED | 34.7 | 82.3 | 25 | 0 |
| 1934 | 5  | 30 | 12 | 1  | NOT NAMED | 34.8 | 82.7 | 25 | 0 |
| 1934 | 5  | 30 | 18 | 1  | NOT NAMED | 34.4 | 83.0 | 25 | 0 |
| 1934 | 5  | 31 | 0  | 1  | NOT NAMED | 34.0 | 83.0 | 20 | 0 |
| 1934 | 5  | 31 | 6  | 1  | NOT NAMED | 33.6 | 82.9 | 20 | 0 |
| 1934 | 5  | 31 | 12 | 1  | NOT NAMED | 33.4 | 82.6 | 15 | 0 |
| 1934 | 5  | 31 | 18 | 1  | NOT NAMED | 33.4 | 80.8 | 15 | 0 |
| 1934 | 6  | 4  | 12 | 2  | NOT NAMED | 16.3 | 87.7 | 40 | 0 |
| 1934 | 6  | 4  | 18 | 2  | NOT NAMED | 16.7 | 87.7 | 40 | 0 |
| 1934 | 6  | 5  | 0  | 2  | NOT NAMED | 17.0 | 87.8 | 40 | 0 |
| 1934 | 6  | 5  | 6  | 2  | NOT NAMED | 17.2 | 88.1 | 40 | 0 |
| 1934 | 6  | 5  | 12 | 2  | NOT NAMED | 17.3 | 88.2 | 40 | 0 |
| 1934 | 6  | 5  | 18 | 2  | NOT NAMED | 17.2 | 88.6 | 40 | 0 |
| 1934 | 6  | 6  | 0  | 2  | NOT NAMED | 17.2 | 89.0 | 40 | 0 |
| 1934 | 6  | 6  | 6  | 2  | NOT NAMED | 16.8 | 89.6 | 35 | 0 |
| 1934 | 6  | 6  | 12 | 2  | NOT NAMED | 16.3 | 90.0 | 35 | 0 |
| 1934 | 6  | 6  | 18 | 2  | NOT NAMED | 15.9 | 90.2 | 40 | 0 |
| 1934 | 6  | 7  | 0  | 2  | NOT NAMED | 15.1 | 90.5 | 40 | 0 |
| 1934 | 6  | 7  | 6  | 2  | NOT NAMED | 14.5 | 90.5 | 45 | 0 |
| 1934 | 6  | 7  | 12 | 2  | NOT NAMED | 14.3 | 89.8 | 55 | 0 |
| 1934 | 6  | 7  | 18 | 2  | NOT NAMED | 14.7 | 89.2 | 60 | 0 |
| 1934 | 6  | 8  | 0  | 2  | NOT NAMED | 15.7 | 88.6 | 60 | 0 |
| 1934 | 6  | 8  | 6  | 2  | NOT NAMED | 16.7 | 88.2 | 60 | 0 |
| 1934 | 6  | 8  | 12 | 2  | NOT NAMED | 17.7 | 87.8 | 70 | 0 |
| 1934 | 6  | 8  | 18 | 2  | NOT NAMED | 18.6 | 87.6 | 70 | 0 |
| 1934 | 6  | 9  | 0  | 2  | NOT NAMED | 19.4 | 87.8 | 70 | 0 |
| 1934 | 6  | 9  | 6  | 2  | NOT NAMED | 20.0 | 88.3 | 60 | 0 |
| 1934 | 6  | 9  | 12 | 2  | NOT NAMED | 20.4 | 89.0 | 55 | 0 |
| 1934 | 6  | 9  | 18 | 2  | NOT NAMED | 20.7 | 89.8 | 40 | 0 |
| 1934 | 6  | 10 | 0  | 2  | NOT NAMED | 20.8 | 90.5 | 35 | 0 |
| 1934 | 6  | 10 | 6  | 2  | NOT NAMED | 21.0 | 91.1 | 35 | 0 |

|      |         |             |      |      |    |   |
|------|---------|-------------|------|------|----|---|
| 1934 | 6 10 12 | 2 NOT NAMED | 21.1 | 91.7 | 35 | 0 |
| 1934 | 6 10 18 | 2 NOT NAMED | 21.3 | 92.2 | 35 | 0 |
| 1934 | 6 11 0  | 2 NOT NAMED | 21.5 | 92.7 | 35 | 0 |
| 1934 | 6 11 6  | 2 NOT NAMED | 21.9 | 93.3 | 40 | 0 |
| 1934 | 6 11 12 | 2 NOT NAMED | 22.0 | 93.9 | 40 | 0 |
| 1934 | 6 11 18 | 2 NOT NAMED | 21.7 | 94.2 | 40 | 0 |
| 1934 | 6 12 0  | 2 NOT NAMED | 21.3 | 94.4 | 45 | 0 |
| 1934 | 6 12 6  | 2 NOT NAMED | 20.9 | 94.3 | 45 | 0 |
| 1934 | 6 12 12 | 2 NOT NAMED | 20.8 | 93.8 | 50 | 0 |
| 1934 | 6 12 18 | 2 NOT NAMED | 20.8 | 93.4 | 50 | 0 |
| 1934 | 6 13 0  | 2 NOT NAMED | 21.1 | 93.0 | 55 | 0 |
| 1934 | 6 13 6  | 2 NOT NAMED | 21.6 | 92.7 | 55 | 0 |
| 1934 | 6 13 12 | 2 NOT NAMED | 22.0 | 92.5 | 55 | 0 |
| 1934 | 6 13 18 | 2 NOT NAMED | 22.3 | 92.3 | 60 | 0 |
| 1934 | 6 14 0  | 2 NOT NAMED | 22.5 | 92.2 | 60 | 0 |
| 1934 | 6 14 6  | 2 NOT NAMED | 22.8 | 92.1 | 65 | 0 |
| 1934 | 6 14 12 | 2 NOT NAMED | 23.1 | 92.0 | 70 | 0 |
| 1934 | 6 14 18 | 2 NOT NAMED | 23.7 | 91.8 | 70 | 0 |
| 1934 | 6 15 0  | 2 NOT NAMED | 24.3 | 91.6 | 70 | 0 |
| 1934 | 6 15 6  | 2 NOT NAMED | 24.7 | 91.4 | 70 | 0 |
| 1934 | 6 15 12 | 2 NOT NAMED | 25.2 | 91.3 | 70 | 0 |
| 1934 | 6 15 18 | 2 NOT NAMED | 25.9 | 91.2 | 70 | 0 |
| 1934 | 6 16 0  | 2 NOT NAMED | 26.8 | 91.2 | 70 | 0 |
| 1934 | 6 16 6  | 2 NOT NAMED | 27.7 | 91.1 | 70 | 0 |
| 1934 | 6 16 12 | 2 NOT NAMED | 28.7 | 91.0 | 65 | 0 |
| 1934 | 6 16 18 | 2 NOT NAMED | 29.8 | 91.0 | 60 | 0 |
| 1934 | 6 17 0  | 2 NOT NAMED | 30.9 | 91.0 | 60 | 0 |
| 1934 | 6 17 6  | 2 NOT NAMED | 32.3 | 90.8 | 55 | 0 |
| 1934 | 6 17 12 | 2 NOT NAMED | 33.8 | 90.2 | 45 | 0 |
| 1934 | 6 17 18 | 2 NOT NAMED | 34.9 | 88.9 | 40 | 0 |
| 1934 | 6 18 0  | 2 NOT NAMED | 35.8 | 87.3 | 35 | 0 |
| 1934 | 6 18 6  | 2 NOT NAMED | 36.5 | 85.7 | 35 | 0 |
| 1934 | 6 18 12 | 2 NOT NAMED | 37.2 | 83.9 | 35 | 0 |
| 1934 | 6 18 18 | 2 NOT NAMED | 37.8 | 81.8 | 40 | 0 |
| 1934 | 6 19 0  | 2 NOT NAMED | 38.4 | 79.7 | 40 | 0 |
| 1934 | 6 19 6  | 2 NOT NAMED | 39.1 | 77.5 | 40 | 0 |
| 1934 | 6 19 12 | 2 NOT NAMED | 39.8 | 75.4 | 40 | 0 |
| 1934 | 6 19 18 | 2 NOT NAMED | 40.5 | 73.9 | 40 | 0 |
| 1934 | 6 20 0  | 2 NOT NAMED | 41.1 | 72.4 | 40 | 0 |
| 1934 | 6 20 6  | 2 NOT NAMED | 42.0 | 70.2 | 40 | 0 |
| 1934 | 6 20 12 | 2 NOT NAMED | 43.2 | 68.0 | 40 | 0 |
| 1934 | 6 20 18 | 2 NOT NAMED | 45.2 | 66.0 | 40 | 0 |
| 1934 | 6 21 0  | 2 NOT NAMED | 47.2 | 64.2 | 35 | 0 |
| 1934 | 6 21 6  | 2 NOT NAMED | 48.5 | 62.6 | 35 | 0 |

|      |         |             |      |       |    |   |
|------|---------|-------------|------|-------|----|---|
| 1934 | 6 21 12 | 2 NOT NAMED | 49.7 | 61.0  | 35 | 0 |
| 1934 | 6 21 18 | 2 NOT NAMED | 51.0 | 59.4  | 35 | 0 |
| 1934 | 7 21 6  | 3 NOT NAMED | 33.9 | 75.5  | 35 | 0 |
| 1934 | 7 21 12 | 3 NOT NAMED | 33.7 | 78.0  | 40 | 0 |
| 1934 | 7 21 18 | 3 NOT NAMED | 33.0 | 78.6  | 40 | 0 |
| 1934 | 7 22 0  | 3 NOT NAMED | 32.5 | 78.9  | 40 | 0 |
| 1934 | 7 22 6  | 3 NOT NAMED | 32.2 | 79.0  | 40 | 0 |
| 1934 | 7 22 12 | 3 NOT NAMED | 31.9 | 79.1  | 40 | 0 |
| 1934 | 7 22 18 | 3 NOT NAMED | 30.9 | 79.8  | 40 | 0 |
| 1934 | 7 23 0  | 3 NOT NAMED | 29.8 | 81.0  | 40 | 0 |
| 1934 | 7 23 6  | 3 NOT NAMED | 29.1 | 82.7  | 40 | 0 |
| 1934 | 7 23 12 | 3 NOT NAMED | 28.6 | 84.3  | 40 | 0 |
| 1934 | 7 23 18 | 3 NOT NAMED | 28.4 | 85.8  | 40 | 0 |
| 1934 | 7 24 0  | 3 NOT NAMED | 28.2 | 87.3  | 35 | 0 |
| 1934 | 7 24 6  | 3 NOT NAMED | 28.1 | 88.7  | 40 | 0 |
| 1934 | 7 24 12 | 3 NOT NAMED | 28.0 | 90.1  | 45 | 0 |
| 1934 | 7 24 18 | 3 NOT NAMED | 28.0 | 91.5  | 45 | 0 |
| 1934 | 7 25 0  | 3 NOT NAMED | 28.0 | 93.0  | 50 | 0 |
| 1934 | 7 25 6  | 3 NOT NAMED | 28.0 | 94.1  | 60 | 0 |
| 1934 | 7 25 12 | 3 NOT NAMED | 28.0 | 95.1  | 65 | 0 |
| 1934 | 7 25 18 | 3 NOT NAMED | 27.9 | 96.8  | 65 | 0 |
| 1934 | 7 26 0  | 3 NOT NAMED | 27.8 | 98.3  | 60 | 0 |
| 1934 | 7 26 6  | 3 NOT NAMED | 27.8 | 99.3  | 35 | 0 |
| 1934 | 7 26 12 | 3 NOT NAMED | 27.8 | 100.2 | 20 | 0 |
| 1934 | 8 20 18 | 4 NOT NAMED | 14.8 | 57.0  | 35 | 0 |
| 1934 | 8 21 0  | 4 NOT NAMED | 15.2 | 59.2  | 35 | 0 |
| 1934 | 8 21 6  | 4 NOT NAMED | 15.3 | 60.4  | 35 | 0 |
| 1934 | 8 21 12 | 4 NOT NAMED | 15.4 | 61.6  | 35 | 0 |
| 1934 | 8 21 18 | 4 NOT NAMED | 15.6 | 62.8  | 35 | 0 |
| 1934 | 8 22 0  | 4 NOT NAMED | 15.9 | 64.0  | 35 | 0 |
| 1934 | 8 22 6  | 4 NOT NAMED | 16.0 | 64.9  | 35 | 0 |
| 1934 | 8 22 12 | 4 NOT NAMED | 16.2 | 65.7  | 35 | 0 |
| 1934 | 8 22 18 | 4 NOT NAMED | 16.4 | 66.9  | 35 | 0 |
| 1934 | 8 23 0  | 4 NOT NAMED | 16.6 | 68.5  | 30 | 0 |
| 1934 | 8 23 6  | 4 NOT NAMED | 16.9 | 70.6  | 30 | 0 |
| 1934 | 8 26 6  | 5 NOT NAMED | 27.2 | 88.0  | 35 | 0 |
| 1934 | 8 26 12 | 5 NOT NAMED | 27.2 | 89.8  | 40 | 0 |
| 1934 | 8 26 18 | 5 NOT NAMED | 27.3 | 90.6  | 45 | 0 |
| 1934 | 8 27 0  | 5 NOT NAMED | 27.7 | 91.5  | 50 | 0 |
| 1934 | 8 27 6  | 5 NOT NAMED | 28.5 | 92.7  | 55 | 0 |
| 1934 | 8 27 12 | 5 NOT NAMED | 29.2 | 93.8  | 60 | 0 |
| 1934 | 8 27 18 | 5 NOT NAMED | 29.2 | 94.5  | 65 | 0 |
| 1934 | 8 28 0  | 5 NOT NAMED | 29.0 | 94.9  | 70 | 0 |
| 1934 | 8 28 6  | 5 NOT NAMED | 28.6 | 95.3  | 70 | 0 |

|      |         |             |      |       |    |   |
|------|---------|-------------|------|-------|----|---|
| 1934 | 8 28 12 | 5 NOT NAMED | 28.2 | 95.5  | 70 | 0 |
| 1934 | 8 28 18 | 5 NOT NAMED | 27.9 | 95.6  | 70 | 0 |
| 1934 | 8 29 0  | 5 NOT NAMED | 27.6 | 95.6  | 60 | 0 |
| 1934 | 8 29 6  | 5 NOT NAMED | 27.3 | 95.6  | 60 | 0 |
| 1934 | 8 29 12 | 5 NOT NAMED | 26.9 | 95.6  | 55 | 0 |
| 1934 | 8 29 18 | 5 NOT NAMED | 26.4 | 95.5  | 55 | 0 |
| 1934 | 8 30 0  | 5 NOT NAMED | 25.9 | 95.5  | 55 | 0 |
| 1934 | 8 30 6  | 5 NOT NAMED | 25.5 | 95.5  | 50 | 0 |
| 1934 | 8 30 12 | 5 NOT NAMED | 25.1 | 95.5  | 50 | 0 |
| 1934 | 8 30 18 | 5 NOT NAMED | 24.8 | 95.5  | 45 | 0 |
| 1934 | 8 31 0  | 5 NOT NAMED | 24.4 | 95.5  | 45 | 0 |
| 1934 | 8 31 6  | 5 NOT NAMED | 24.0 | 95.6  | 45 | 0 |
| 1934 | 8 31 12 | 5 NOT NAMED | 23.5 | 96.0  | 45 | 0 |
| 1934 | 8 31 18 | 5 NOT NAMED | 22.9 | 96.7  | 40 | 0 |
| 1934 | 9 1 0   | 5 NOT NAMED | 22.5 | 97.4  | 40 | 0 |
| 1934 | 9 1 6   | 5 NOT NAMED | 22.3 | 98.0  | 35 | 0 |
| 1934 | 9 1 12  | 5 NOT NAMED | 22.1 | 98.6  | 35 | 0 |
| 1934 | 9 1 18  | 5 NOT NAMED | 21.9 | 100.0 | 20 | 0 |
| 1934 | 9 5 6   | 6 NOT NAMED | 24.5 | 72.5  | 60 | 0 |
| 1934 | 9 5 12  | 6 NOT NAMED | 25.3 | 74.5  | 65 | 0 |
| 1934 | 9 5 18  | 6 NOT NAMED | 25.4 | 74.9  | 70 | 0 |
| 1934 | 9 6 0   | 6 NOT NAMED | 25.6 | 75.3  | 70 | 0 |
| 1934 | 9 6 6   | 6 NOT NAMED | 25.8 | 75.7  | 75 | 0 |
| 1934 | 9 6 12  | 6 NOT NAMED | 26.1 | 76.1  | 80 | 0 |
| 1934 | 9 6 18  | 6 NOT NAMED | 27.0 | 76.6  | 80 | 0 |
| 1934 | 9 7 0   | 6 NOT NAMED | 28.0 | 77.1  | 85 | 0 |
| 1934 | 9 7 6   | 6 NOT NAMED | 28.7 | 77.2  | 85 | 0 |
| 1934 | 9 7 12  | 6 NOT NAMED | 29.3 | 77.2  | 85 | 0 |
| 1934 | 9 7 18  | 6 NOT NAMED | 30.2 | 77.2  | 85 | 0 |
| 1934 | 9 8 0   | 6 NOT NAMED | 31.7 | 77.0  | 80 | 0 |
| 1934 | 9 8 6   | 6 NOT NAMED | 34.0 | 76.0  | 75 | 0 |
| 1934 | 9 8 12  | 6 NOT NAMED | 36.3 | 74.8  | 70 | 0 |
| 1934 | 9 8 18  | 6 NOT NAMED | 38.7 | 73.8  | 65 | 0 |
| 1934 | 9 9 0   | 6 NOT NAMED | 40.6 | 72.9  | 55 | 0 |
| 1934 | 9 9 6   | 6 NOT NAMED | 41.8 | 72.3  | 45 | 0 |
| 1934 | 9 9 12  | 6 NOT NAMED | 43.0 | 71.7  | 40 | 0 |
| 1934 | 9 9 18  | 6 NOT NAMED | 45.0 | 69.5  | 35 | 0 |
| 1934 | 9 16 12 | 7 NOT NAMED | 13.2 | 57.2  | 35 | 0 |
| 1934 | 9 16 18 | 7 NOT NAMED | 14.7 | 59.0  | 35 | 0 |
| 1934 | 9 17 0  | 7 NOT NAMED | 15.6 | 60.0  | 35 | 0 |
| 1934 | 9 17 6  | 7 NOT NAMED | 16.0 | 60.4  | 35 | 0 |
| 1934 | 9 17 12 | 7 NOT NAMED | 16.9 | 60.8  | 35 | 0 |
| 1934 | 9 17 18 | 7 NOT NAMED | 17.0 | 61.2  | 40 | 0 |
| 1934 | 9 18 0  | 7 NOT NAMED | 17.6 | 61.6  | 40 | 0 |

|      |    |    |    |             |      |      |    |   |
|------|----|----|----|-------------|------|------|----|---|
| 1934 | 9  | 18 | 6  | 7 NOT NAMED | 18.2 | 62.3 | 40 | 0 |
| 1934 | 9  | 18 | 12 | 7 NOT NAMED | 18.8 | 63.1 | 40 | 0 |
| 1934 | 9  | 18 | 18 | 7 NOT NAMED | 19.4 | 63.9 | 40 | 0 |
| 1934 | 9  | 19 | 0  | 7 NOT NAMED | 20.0 | 64.7 | 40 | 0 |
| 1934 | 9  | 19 | 6  | 7 NOT NAMED | 20.4 | 65.5 | 40 | 0 |
| 1934 | 9  | 19 | 12 | 7 NOT NAMED | 21.0 | 66.2 | 40 | 0 |
| 1934 | 9  | 19 | 18 | 7 NOT NAMED | 21.9 | 67.3 | 40 | 0 |
| 1934 | 9  | 20 | 0  | 7 NOT NAMED | 22.8 | 68.3 | 40 | 0 |
| 1934 | 9  | 20 | 6  | 7 NOT NAMED | 23.7 | 68.9 | 40 | 0 |
| 1934 | 9  | 20 | 12 | 7 NOT NAMED | 24.6 | 69.5 | 35 | 0 |
| 1934 | 9  | 20 | 18 | 7 NOT NAMED | 25.8 | 70.1 | 35 | 0 |
| 1934 | 9  | 21 | 0  | 7 NOT NAMED | 27.1 | 70.6 | 35 | 0 |
| 1934 | 9  | 21 | 6  | 7 NOT NAMED | 28.4 | 71.0 | 35 | 0 |
| 1934 | 9  | 21 | 12 | 7 NOT NAMED | 29.8 | 71.3 | 30 | 0 |
| 1934 | 9  | 21 | 18 | 7 NOT NAMED | 31.6 | 71.7 | 30 | 0 |
| 1934 | 9  | 22 | 0  | 7 NOT NAMED | 33.9 | 72.2 | 25 | 0 |
| 1934 | 9  | 22 | 6  | 7 NOT NAMED | 35.5 | 72.6 | 25 | 0 |
| 1934 | 10 | 1  | 12 | 8 NOT NAMED | 25.4 | 36.1 | 60 | 0 |
| 1934 | 10 | 1  | 18 | 8 NOT NAMED | 26.4 | 37.4 | 60 | 0 |
| 1934 | 10 | 2  | 0  | 8 NOT NAMED | 27.2 | 38.8 | 65 | 0 |
| 1934 | 10 | 2  | 6  | 8 NOT NAMED | 27.6 | 40.3 | 70 | 0 |
| 1934 | 10 | 2  | 12 | 8 NOT NAMED | 28.1 | 41.9 | 80 | 0 |
| 1934 | 10 | 2  | 18 | 8 NOT NAMED | 28.9 | 43.5 | 85 | 0 |
| 1934 | 10 | 3  | 0  | 8 NOT NAMED | 29.7 | 45.0 | 85 | 0 |
| 1934 | 10 | 3  | 6  | 8 NOT NAMED | 30.5 | 46.4 | 75 | 0 |
| 1934 | 10 | 3  | 12 | 8 NOT NAMED | 31.4 | 47.9 | 65 | 0 |
| 1934 | 10 | 3  | 18 | 8 NOT NAMED | 31.9 | 52.5 | 30 | 0 |
| 1934 | 10 | 1  | 12 | 9 NOT NAMED | 21.2 | 83.8 | 35 | 0 |
| 1934 | 10 | 1  | 18 | 9 NOT NAMED | 21.5 | 84.5 | 35 | 0 |
| 1934 | 10 | 2  | 0  | 9 NOT NAMED | 21.7 | 85.1 | 35 | 0 |
| 1934 | 10 | 2  | 6  | 9 NOT NAMED | 22.0 | 85.7 | 35 | 0 |
| 1934 | 10 | 2  | 12 | 9 NOT NAMED | 22.2 | 86.3 | 35 | 0 |
| 1934 | 10 | 2  | 18 | 9 NOT NAMED | 22.5 | 86.7 | 35 | 0 |
| 1934 | 10 | 3  | 0  | 9 NOT NAMED | 22.8 | 87.1 | 40 | 0 |
| 1934 | 10 | 3  | 6  | 9 NOT NAMED | 23.2 | 87.7 | 40 | 0 |
| 1934 | 10 | 3  | 12 | 9 NOT NAMED | 23.7 | 88.2 | 45 | 0 |
| 1934 | 10 | 3  | 18 | 9 NOT NAMED | 24.1 | 88.7 | 45 | 0 |
| 1934 | 10 | 4  | 0  | 9 NOT NAMED | 24.6 | 89.2 | 50 | 0 |
| 1934 | 10 | 4  | 6  | 9 NOT NAMED | 25.1 | 89.6 | 50 | 0 |
| 1934 | 10 | 4  | 12 | 9 NOT NAMED | 25.6 | 89.8 | 50 | 0 |
| 1934 | 10 | 4  | 18 | 9 NOT NAMED | 26.1 | 89.9 | 50 | 0 |
| 1934 | 10 | 5  | 0  | 9 NOT NAMED | 26.8 | 89.6 | 45 | 0 |
| 1934 | 10 | 5  | 6  | 9 NOT NAMED | 27.7 | 89.1 | 40 | 0 |
| 1934 | 10 | 5  | 12 | 9 NOT NAMED | 28.6 | 88.6 | 40 | 0 |



|      |    |    |    |    |           |      |      |    |   |
|------|----|----|----|----|-----------|------|------|----|---|
| 1934 | 10 | 5  | 18 | 9  | NOT NAMED | 29.5 | 88.4 | 40 | 0 |
| 1934 | 10 | 6  | 0  | 9  | NOT NAMED | 30.2 | 88.2 | 35 | 0 |
| 1934 | 10 | 6  | 6  | 9  | NOT NAMED | 30.8 | 87.9 | 35 | 0 |
| 1934 | 10 | 6  | 12 | 9  | NOT NAMED | 31.4 | 87.6 | 35 | 0 |
| 1934 | 10 | 6  | 18 | 9  | NOT NAMED | 31.8 | 86.0 | 30 | 0 |
| 1934 | 10 | 19 | 18 | 10 | NOT NAMED | 16.2 | 76.1 | 35 | 0 |
| 1934 | 10 | 20 | 0  | 10 | NOT NAMED | 16.8 | 76.4 | 35 | 0 |
| 1934 | 10 | 20 | 6  | 10 | NOT NAMED | 17.3 | 76.6 | 40 | 0 |
| 1934 | 10 | 20 | 12 | 10 | NOT NAMED | 17.9 | 76.9 | 40 | 0 |
| 1934 | 10 | 20 | 18 | 10 | NOT NAMED | 18.3 | 77.2 | 40 | 0 |
| 1934 | 10 | 21 | 0  | 10 | NOT NAMED | 18.9 | 77.6 | 40 | 0 |
| 1934 | 10 | 21 | 6  | 10 | NOT NAMED | 19.6 | 77.8 | 40 | 0 |
| 1934 | 10 | 21 | 12 | 10 | NOT NAMED | 20.5 | 77.7 | 40 | 0 |
| 1934 | 10 | 21 | 18 | 10 | NOT NAMED | 21.8 | 76.5 | 35 | 0 |
| 1934 | 10 | 22 | 0  | 10 | NOT NAMED | 23.2 | 75.4 | 35 | 0 |
| 1934 | 10 | 22 | 6  | 10 | NOT NAMED | 24.4 | 74.3 | 35 | 0 |
| 1934 | 10 | 22 | 12 | 10 | NOT NAMED | 25.6 | 73.1 | 35 | 0 |
| 1934 | 10 | 22 | 18 | 10 | NOT NAMED | 27.0 | 71.5 | 35 | 0 |
| 1934 | 10 | 23 | 0  | 10 | NOT NAMED | 28.2 | 69.6 | 35 | 0 |
| 1934 | 10 | 23 | 6  | 10 | NOT NAMED | 29.1 | 67.9 | 35 | 0 |
| 1934 | 10 | 23 | 12 | 10 | NOT NAMED | 30.1 | 66.2 | 35 | 0 |
| 1934 | 10 | 23 | 18 | 10 | NOT NAMED | 31.1 | 63.5 | 30 | 0 |
| 1934 | 11 | 20 | 6  | 11 | NOT NAMED | 20.9 | 57.6 | 35 | 0 |
| 1934 | 11 | 20 | 12 | 11 | NOT NAMED | 21.6 | 58.0 | 35 | 0 |
| 1934 | 11 | 20 | 18 | 11 | NOT NAMED | 22.2 | 58.4 | 35 | 0 |
| 1934 | 11 | 21 | 0  | 11 | NOT NAMED | 22.7 | 58.8 | 35 | 0 |
| 1934 | 11 | 21 | 6  | 11 | NOT NAMED | 23.2 | 59.4 | 35 | 0 |
| 1934 | 11 | 21 | 12 | 11 | NOT NAMED | 23.7 | 59.9 | 35 | 0 |
| 1934 | 11 | 21 | 18 | 11 | NOT NAMED | 24.1 | 60.4 | 35 | 0 |
| 1934 | 11 | 22 | 0  | 11 | NOT NAMED | 24.4 | 60.8 | 40 | 0 |
| 1934 | 11 | 22 | 6  | 11 | NOT NAMED | 24.7 | 61.2 | 40 | 0 |
| 1934 | 11 | 22 | 12 | 11 | NOT NAMED | 25.0 | 61.6 | 40 | 0 |
| 1934 | 11 | 22 | 18 | 11 | NOT NAMED | 25.3 | 62.6 | 40 | 0 |
| 1934 | 11 | 23 | 0  | 11 | NOT NAMED | 25.7 | 63.8 | 45 | 0 |
| 1934 | 11 | 23 | 6  | 11 | NOT NAMED | 26.0 | 64.8 | 45 | 0 |
| 1934 | 11 | 23 | 12 | 11 | NOT NAMED | 26.3 | 65.7 | 50 | 0 |
| 1934 | 11 | 23 | 18 | 11 | NOT NAMED | 27.2 | 66.6 | 55 | 0 |
| 1934 | 11 | 24 | 0  | 11 | NOT NAMED | 28.1 | 67.4 | 60 | 0 |
| 1934 | 11 | 24 | 6  | 11 | NOT NAMED | 28.5 | 67.5 | 65 | 0 |
| 1934 | 11 | 24 | 12 | 11 | NOT NAMED | 29.0 | 67.6 | 70 | 0 |
| 1934 | 11 | 24 | 18 | 11 | NOT NAMED | 29.5 | 67.6 | 70 | 0 |
| 1934 | 11 | 25 | 0  | 11 | NOT NAMED | 30.1 | 67.3 | 75 | 0 |
| 1934 | 11 | 25 | 6  | 11 | NOT NAMED | 30.7 | 66.6 | 75 | 0 |
| 1934 | 11 | 25 | 12 | 11 | NOT NAMED | 31.3 | 65.8 | 75 | 0 |

|      |    |    |    |    |           |      |      |     |   |
|------|----|----|----|----|-----------|------|------|-----|---|
| 1934 | 11 | 25 | 18 | 11 | NOT NAMED | 31.5 | 65.4 | 75  | 0 |
| 1934 | 11 | 26 | 0  | 11 | NOT NAMED | 31.5 | 64.8 | 70  | 0 |
| 1934 | 11 | 26 | 6  | 11 | NOT NAMED | 29.8 | 65.4 | 70  | 0 |
| 1934 | 11 | 26 | 12 | 11 | NOT NAMED | 28.3 | 66.7 | 60  | 0 |
| 1934 | 11 | 26 | 18 | 11 | NOT NAMED | 26.9 | 68.0 | 60  | 0 |
| 1934 | 11 | 27 | 0  | 11 | NOT NAMED | 25.9 | 68.8 | 55  | 0 |
| 1934 | 11 | 27 | 6  | 11 | NOT NAMED | 24.3 | 69.6 | 50  | 0 |
| 1934 | 11 | 27 | 12 | 11 | NOT NAMED | 23.2 | 69.8 | 45  | 0 |
| 1934 | 11 | 27 | 18 | 11 | NOT NAMED | 22.6 | 70.0 | 45  | 0 |
| 1934 | 11 | 28 | 0  | 11 | NOT NAMED | 22.1 | 70.2 | 40  | 0 |
| 1934 | 11 | 28 | 6  | 11 | NOT NAMED | 21.3 | 70.5 | 40  | 0 |
| 1934 | 11 | 28 | 12 | 11 | NOT NAMED | 20.5 | 70.8 | 35  | 0 |
| 1934 | 11 | 28 | 18 | 11 | NOT NAMED | 18.5 | 71.0 | 25  | 0 |
| 1935 | 8  | 18 | 6  | 1  | NOT NAMED | 19.5 | 59.0 | 65  | 0 |
| 1935 | 8  | 18 | 12 | 1  | NOT NAMED | 20.2 | 60.8 | 70  | 0 |
| 1935 | 8  | 18 | 18 | 1  | NOT NAMED | 20.6 | 61.8 | 75  | 0 |
| 1935 | 8  | 19 | 0  | 1  | NOT NAMED | 21.0 | 62.7 | 75  | 0 |
| 1935 | 8  | 19 | 6  | 1  | NOT NAMED | 21.4 | 63.4 | 80  | 0 |
| 1935 | 8  | 19 | 12 | 1  | NOT NAMED | 21.8 | 64.1 | 80  | 0 |
| 1935 | 8  | 19 | 18 | 1  | NOT NAMED | 22.2 | 64.8 | 85  | 0 |
| 1935 | 8  | 20 | 0  | 1  | NOT NAMED | 22.6 | 65.5 | 90  | 0 |
| 1935 | 8  | 20 | 6  | 1  | NOT NAMED | 23.2 | 66.3 | 90  | 0 |
| 1935 | 8  | 20 | 12 | 1  | NOT NAMED | 23.8 | 67.0 | 95  | 0 |
| 1935 | 8  | 20 | 18 | 1  | NOT NAMED | 24.3 | 67.5 | 95  | 0 |
| 1935 | 8  | 21 | 0  | 1  | NOT NAMED | 24.7 | 67.8 | 95  | 0 |
| 1935 | 8  | 21 | 6  | 1  | NOT NAMED | 25.1 | 68.1 | 100 | 0 |
| 1935 | 8  | 21 | 12 | 1  | NOT NAMED | 25.6 | 68.4 | 100 | 0 |
| 1935 | 8  | 21 | 18 | 1  | NOT NAMED | 26.5 | 68.7 | 100 | 0 |
| 1935 | 8  | 22 | 0  | 1  | NOT NAMED | 27.6 | 69.0 | 100 | 0 |
| 1935 | 8  | 22 | 6  | 1  | NOT NAMED | 28.5 | 69.0 | 105 | 0 |
| 1935 | 8  | 22 | 12 | 1  | NOT NAMED | 29.4 | 68.8 | 105 | 0 |
| 1935 | 8  | 22 | 18 | 1  | NOT NAMED | 30.5 | 68.4 | 105 | 0 |
| 1935 | 8  | 23 | 0  | 1  | NOT NAMED | 31.6 | 67.8 | 105 | 0 |
| 1935 | 8  | 23 | 6  | 1  | NOT NAMED | 32.1 | 67.3 | 105 | 0 |
| 1935 | 8  | 23 | 12 | 1  | NOT NAMED | 32.8 | 66.6 | 100 | 0 |
| 1935 | 8  | 23 | 18 | 1  | NOT NAMED | 34.0 | 64.8 | 100 | 0 |
| 1935 | 8  | 24 | 0  | 1  | NOT NAMED | 35.2 | 62.8 | 95  | 0 |
| 1935 | 8  | 24 | 6  | 1  | NOT NAMED | 36.1 | 61.0 | 90  | 0 |
| 1935 | 8  | 24 | 12 | 1  | NOT NAMED | 37.3 | 59.3 | 85  | 0 |
| 1935 | 8  | 24 | 18 | 1  | NOT NAMED | 39.7 | 57.6 | 80  | 0 |
| 1935 | 8  | 25 | 0  | 1  | NOT NAMED | 42.6 | 56.7 | 75  | 0 |
| 1935 | 8  | 25 | 6  | 1  | NOT NAMED | 45.2 | 57.0 | 70  | 0 |
| 1935 | 8  | 25 | 12 | 1  | NOT NAMED | 47.3 | 57.7 | 65  | 0 |
| 1935 | 8  | 25 | 18 | 1  | NOT NAMED | 48.4 | 58.4 | 55  | 0 |

|      |   |    |    |   |           |      |      |     |     |
|------|---|----|----|---|-----------|------|------|-----|-----|
| 1935 | 8 | 26 | 0  | 1 | NOT NAMED | 48.9 | 59.1 | 50  | 0   |
| 1935 | 8 | 26 | 6  | 1 | NOT NAMED | 49.3 | 59.8 | 40  | 0   |
| 1935 | 8 | 26 | 12 | 1 | NOT NAMED | 49.7 | 60.5 | 35  | 0   |
| 1935 | 8 | 26 | 18 | 1 | NOT NAMED | 49.9 | 62.0 | 30  | 0   |
| 1935 | 8 | 29 | 6  | 2 | NOT NAMED | 24.2 | 68.3 | 35  | 0   |
| 1935 | 8 | 29 | 12 | 2 | NOT NAMED | 24.2 | 69.3 | 35  | 0   |
| 1935 | 8 | 29 | 18 | 2 | NOT NAMED | 24.2 | 69.8 | 35  | 0   |
| 1935 | 8 | 30 | 0  | 2 | NOT NAMED | 24.2 | 70.4 | 35  | 0   |
| 1935 | 8 | 30 | 6  | 2 | NOT NAMED | 24.2 | 70.9 | 40  | 0   |
| 1935 | 8 | 30 | 12 | 2 | NOT NAMED | 24.2 | 71.4 | 40  | 0   |
| 1935 | 8 | 30 | 18 | 2 | NOT NAMED | 24.1 | 72.0 | 45  | 0   |
| 1935 | 8 | 31 | 0  | 2 | NOT NAMED | 24.1 | 72.6 | 45  | 0   |
| 1935 | 8 | 31 | 6  | 2 | NOT NAMED | 24.0 | 73.0 | 50  | 0   |
| 1935 | 8 | 31 | 12 | 2 | NOT NAMED | 23.9 | 73.5 | 55  | 0   |
| 1935 | 8 | 31 | 18 | 2 | NOT NAMED | 23.8 | 74.3 | 55  | 0   |
| 1935 | 9 | 1  | 0  | 2 | NOT NAMED | 23.7 | 75.3 | 60  | 0   |
| 1935 | 9 | 1  | 6  | 2 | NOT NAMED | 23.6 | 76.3 | 60  | 0   |
| 1935 | 9 | 1  | 12 | 2 | NOT NAMED | 23.7 | 77.3 | 65  | 0   |
| 1935 | 9 | 1  | 18 | 2 | NOT NAMED | 23.8 | 78.1 | 75  | 0   |
| 1935 | 9 | 2  | 0  | 2 | NOT NAMED | 23.9 | 78.6 | 90  | 0   |
| 1935 | 9 | 2  | 6  | 2 | NOT NAMED | 24.0 | 79.0 | 105 | 0   |
| 1935 | 9 | 2  | 12 | 2 | NOT NAMED | 24.2 | 79.3 | 120 | 0   |
| 1935 | 9 | 2  | 18 | 2 | NOT NAMED | 24.3 | 79.7 | 130 | 0   |
| 1935 | 9 | 3  | 0  | 2 | NOT NAMED | 24.5 | 80.1 | 140 | 892 |
| 1935 | 9 | 3  | 6  | 2 | NOT NAMED | 24.9 | 80.8 | 130 | 0   |
| 1935 | 9 | 3  | 12 | 2 | NOT NAMED | 25.2 | 81.3 | 115 | 0   |
| 1935 | 9 | 3  | 18 | 2 | NOT NAMED | 26.1 | 82.3 | 100 | 0   |
| 1935 | 9 | 4  | 0  | 2 | NOT NAMED | 27.1 | 83.0 | 95  | 0   |
| 1935 | 9 | 4  | 6  | 2 | NOT NAMED | 27.9 | 83.4 | 85  | 0   |
| 1935 | 9 | 4  | 12 | 2 | NOT NAMED | 28.7 | 83.5 | 80  | 0   |
| 1935 | 9 | 4  | 18 | 2 | NOT NAMED | 29.5 | 83.5 | 75  | 0   |
| 1935 | 9 | 5  | 0  | 2 | NOT NAMED | 30.5 | 83.2 | 60  | 0   |
| 1935 | 9 | 5  | 6  | 2 | NOT NAMED | 31.7 | 82.7 | 60  | 0   |
| 1935 | 9 | 5  | 12 | 2 | NOT NAMED | 33.0 | 81.7 | 55  | 0   |
| 1935 | 9 | 5  | 18 | 2 | NOT NAMED | 34.1 | 80.5 | 55  | 0   |
| 1935 | 9 | 6  | 0  | 2 | NOT NAMED | 35.2 | 79.1 | 55  | 0   |
| 1935 | 9 | 6  | 6  | 2 | NOT NAMED | 36.1 | 77.2 | 60  | 0   |
| 1935 | 9 | 6  | 12 | 2 | NOT NAMED | 37.0 | 75.1 | 65  | 0   |
| 1935 | 9 | 6  | 18 | 2 | NOT NAMED | 38.3 | 70.9 | 75  | 0   |
| 1935 | 9 | 7  | 0  | 2 | NOT NAMED | 39.7 | 65.4 | 80  | 0   |
| 1935 | 9 | 7  | 6  | 2 | NOT NAMED | 40.8 | 60.2 | 80  | 0   |
| 1935 | 9 | 7  | 12 | 2 | NOT NAMED | 42.0 | 55.0 | 80  | 0   |
| 1935 | 9 | 7  | 18 | 2 | NOT NAMED | 43.3 | 49.8 | 75  | 0   |
| 1935 | 9 | 8  | 0  | 2 | NOT NAMED | 44.8 | 44.7 | 75  | 0   |

|      |   |    |    |             |      |      |     |   |
|------|---|----|----|-------------|------|------|-----|---|
| 1935 | 9 | 8  | 6  | 2 NOT NAMED | 46.6 | 39.6 | 70  | 0 |
| 1935 | 9 | 8  | 12 | 2 NOT NAMED | 48.5 | 36.3 | 65  | 0 |
| 1935 | 9 | 8  | 18 | 2 NOT NAMED | 49.3 | 35.1 | 60  | 0 |
| 1935 | 9 | 9  | 0  | 2 NOT NAMED | 50.0 | 34.2 | 60  | 0 |
| 1935 | 9 | 9  | 6  | 2 NOT NAMED | 52.1 | 32.1 | 55  | 0 |
| 1935 | 9 | 9  | 12 | 2 NOT NAMED | 54.0 | 31.2 | 50  | 0 |
| 1935 | 9 | 9  | 18 | 2 NOT NAMED | 55.0 | 31.1 | 45  | 0 |
| 1935 | 9 | 10 | 0  | 2 NOT NAMED | 56.0 | 32.1 | 40  | 0 |
| 1935 | 9 | 10 | 6  | 2 NOT NAMED | 57.0 | 33.5 | 35  | 0 |
| 1935 | 9 | 10 | 12 | 2 NOT NAMED | 58.0 | 36.0 | 35  | 0 |
| 1935 | 8 | 30 | 12 | 3 NOT NAMED | 22.0 | 87.5 | 40  | 0 |
| 1935 | 8 | 30 | 18 | 3 NOT NAMED | 21.0 | 88.6 | 35  | 0 |
| 1935 | 8 | 31 | 0  | 3 NOT NAMED | 20.3 | 89.6 | 35  | 0 |
| 1935 | 8 | 31 | 6  | 3 NOT NAMED | 20.0 | 90.4 | 35  | 0 |
| 1935 | 8 | 31 | 12 | 3 NOT NAMED | 19.7 | 91.3 | 35  | 0 |
| 1935 | 8 | 31 | 18 | 3 NOT NAMED | 19.3 | 92.4 | 35  | 0 |
| 1935 | 9 | 1  | 0  | 3 NOT NAMED | 19.1 | 93.4 | 35  | 0 |
| 1935 | 9 | 1  | 6  | 3 NOT NAMED | 18.9 | 94.1 | 35  | 0 |
| 1935 | 9 | 1  | 12 | 3 NOT NAMED | 18.8 | 94.8 | 30  | 0 |
| 1935 | 9 | 1  | 18 | 3 NOT NAMED | 18.0 | 97.0 | 25  | 0 |
| 1935 | 9 | 23 | 6  | 4 NOT NAMED | 14.8 | 73.0 | 35  | 0 |
| 1935 | 9 | 23 | 12 | 4 NOT NAMED | 14.6 | 73.4 | 40  | 0 |
| 1935 | 9 | 23 | 18 | 4 NOT NAMED | 14.4 | 73.9 | 45  | 0 |
| 1935 | 9 | 24 | 0  | 4 NOT NAMED | 14.2 | 74.5 | 50  | 0 |
| 1935 | 9 | 24 | 6  | 4 NOT NAMED | 14.1 | 75.3 | 55  | 0 |
| 1935 | 9 | 24 | 12 | 4 NOT NAMED | 14.1 | 76.0 | 60  | 0 |
| 1935 | 9 | 24 | 18 | 4 NOT NAMED | 14.1 | 76.8 | 65  | 0 |
| 1935 | 9 | 25 | 0  | 4 NOT NAMED | 14.2 | 77.5 | 70  | 0 |
| 1935 | 9 | 25 | 6  | 4 NOT NAMED | 14.3 | 78.2 | 75  | 0 |
| 1935 | 9 | 25 | 12 | 4 NOT NAMED | 14.5 | 78.7 | 80  | 0 |
| 1935 | 9 | 25 | 18 | 4 NOT NAMED | 14.7 | 79.1 | 80  | 0 |
| 1935 | 9 | 26 | 0  | 4 NOT NAMED | 15.0 | 79.5 | 85  | 0 |
| 1935 | 9 | 26 | 6  | 4 NOT NAMED | 15.3 | 79.9 | 90  | 0 |
| 1935 | 9 | 26 | 12 | 4 NOT NAMED | 15.7 | 80.1 | 90  | 0 |
| 1935 | 9 | 26 | 18 | 4 NOT NAMED | 16.2 | 80.0 | 90  | 0 |
| 1935 | 9 | 27 | 0  | 4 NOT NAMED | 16.8 | 79.7 | 95  | 0 |
| 1935 | 9 | 27 | 6  | 4 NOT NAMED | 17.5 | 79.2 | 95  | 0 |
| 1935 | 9 | 27 | 12 | 4 NOT NAMED | 18.3 | 79.0 | 100 | 0 |
| 1935 | 9 | 27 | 18 | 4 NOT NAMED | 19.1 | 79.3 | 100 | 0 |
| 1935 | 9 | 28 | 0  | 4 NOT NAMED | 19.9 | 79.7 | 105 | 0 |
| 1935 | 9 | 28 | 6  | 4 NOT NAMED | 21.2 | 80.2 | 105 | 0 |
| 1935 | 9 | 28 | 12 | 4 NOT NAMED | 22.7 | 80.4 | 100 | 0 |
| 1935 | 9 | 28 | 18 | 4 NOT NAMED | 24.0 | 80.2 | 100 | 0 |
| 1935 | 9 | 29 | 0  | 4 NOT NAMED | 25.2 | 79.6 | 100 | 0 |

|      |    |    |    |             |      |      |     |     |
|------|----|----|----|-------------|------|------|-----|-----|
| 1935 | 9  | 29 | 6  | 4 NOT NAMED | 26.0 | 79.0 | 100 | 0   |
| 1935 | 9  | 29 | 12 | 4 NOT NAMED | 26.7 | 78.2 | 100 | 0   |
| 1935 | 9  | 29 | 18 | 4 NOT NAMED | 27.7 | 77.0 | 100 | 0   |
| 1935 | 9  | 30 | 0  | 4 NOT NAMED | 28.8 | 75.2 | 100 | 0   |
| 1935 | 9  | 30 | 6  | 4 NOT NAMED | 30.1 | 72.9 | 95  | 0   |
| 1935 | 9  | 30 | 12 | 4 NOT NAMED | 31.4 | 70.4 | 95  | 0   |
| 1935 | 9  | 30 | 18 | 4 NOT NAMED | 32.7 | 67.9 | 90  | 0   |
| 1935 | 10 | 1  | 0  | 4 NOT NAMED | 34.3 | 65.4 | 90  | 0   |
| 1935 | 10 | 1  | 6  | 4 NOT NAMED | 36.5 | 63.5 | 85  | 0   |
| 1935 | 10 | 1  | 12 | 4 NOT NAMED | 38.8 | 62.0 | 80  | 0   |
| 1935 | 10 | 1  | 18 | 4 NOT NAMED | 40.7 | 61.5 | 75  | 0   |
| 1935 | 10 | 2  | 0  | 4 NOT NAMED | 43.0 | 60.2 | 65  | 0   |
| 1935 | 10 | 2  | 6  | 4 NOT NAMED | 45.8 | 57.9 | 60  | 0   |
| 1935 | 10 | 2  | 12 | 4 NOT NAMED | 48.7 | 53.6 | 50  | 0   |
| 1935 | 10 | 2  | 18 | 4 NOT NAMED | 49.9 | 51.5 | 50  | 0   |
| 1935 | 10 | 19 | 0  | 5 NOT NAMED | 12.4 | 78.7 | 35  | 0   |
| 1935 | 10 | 19 | 6  | 5 NOT NAMED | 12.9 | 78.2 | 45  | 0   |
| 1935 | 10 | 19 | 12 | 5 NOT NAMED | 13.5 | 77.7 | 55  | 0   |
| 1935 | 10 | 19 | 18 | 5 NOT NAMED | 14.0 | 77.3 | 60  | 0   |
| 1935 | 10 | 20 | 0  | 5 NOT NAMED | 14.4 | 77.1 | 65  | 0   |
| 1935 | 10 | 20 | 6  | 5 NOT NAMED | 14.8 | 76.9 | 70  | 0   |
| 1935 | 10 | 20 | 12 | 5 NOT NAMED | 15.2 | 76.7 | 70  | 0   |
| 1935 | 10 | 20 | 18 | 5 NOT NAMED | 15.5 | 76.5 | 70  | 0   |
| 1935 | 10 | 21 | 0  | 5 NOT NAMED | 15.9 | 76.3 | 75  | 0   |
| 1935 | 10 | 21 | 6  | 5 NOT NAMED | 16.5 | 76.0 | 75  | 0   |
| 1935 | 10 | 21 | 12 | 5 NOT NAMED | 17.2 | 75.7 | 75  | 0   |
| 1935 | 10 | 21 | 18 | 5 NOT NAMED | 17.9 | 75.6 | 75  | 0   |
| 1935 | 10 | 22 | 0  | 5 NOT NAMED | 18.5 | 75.6 | 75  | 0   |
| 1935 | 10 | 22 | 6  | 5 NOT NAMED | 19.1 | 75.7 | 75  | 0   |
| 1935 | 10 | 22 | 12 | 5 NOT NAMED | 19.7 | 76.1 | 60  | 0   |
| 1935 | 10 | 22 | 18 | 5 NOT NAMED | 19.9 | 76.7 | 60  | 0   |
| 1935 | 10 | 23 | 0  | 5 NOT NAMED | 19.7 | 77.4 | 60  | 0   |
| 1935 | 10 | 23 | 6  | 5 NOT NAMED | 19.4 | 78.0 | 60  | 0   |
| 1935 | 10 | 23 | 12 | 5 NOT NAMED | 19.1 | 78.5 | 50  | 0   |
| 1935 | 10 | 23 | 18 | 5 NOT NAMED | 18.8 | 79.0 | 45  | 0   |
| 1935 | 10 | 24 | 0  | 5 NOT NAMED | 18.4 | 79.4 | 45  | 0   |
| 1935 | 10 | 24 | 6  | 5 NOT NAMED | 18.2 | 79.7 | 45  | 0   |
| 1935 | 10 | 24 | 12 | 5 NOT NAMED | 17.9 | 80.1 | 55  | 988 |
| 1935 | 10 | 24 | 18 | 5 NOT NAMED | 17.4 | 80.7 | 65  | 0   |
| 1935 | 10 | 25 | 0  | 5 NOT NAMED | 16.7 | 81.4 | 65  | 0   |
| 1935 | 10 | 25 | 6  | 5 NOT NAMED | 16.0 | 82.3 | 70  | 0   |
| 1935 | 10 | 25 | 12 | 5 NOT NAMED | 15.3 | 83.1 | 75  | 0   |
| 1935 | 10 | 25 | 18 | 5 NOT NAMED | 14.9 | 83.9 | 75  | 0   |
| 1935 | 10 | 26 | 0  | 5 NOT NAMED | 14.9 | 84.6 | 75  | 0   |

|               |   |             |             |      |      |    |     |
|---------------|---|-------------|-------------|------|------|----|-----|
| 1935 10 26    | 6 | 5 NOT NAMED | 14.4        | 85.4 | 65   | 0  |     |
| 1935 10 26 12 | 5 | NOT NAMED   | 14.3        | 86.3 | 35   | 0  |     |
| 1935 10 26 18 | 5 | NOT NAMED   | 14.3        | 87.4 | 25   | 0  |     |
| 1935 10 27    | 0 | 5 NOT NAMED | 14.3        | 87.9 | 20   | 0  |     |
| 1935 10 27    | 6 | 5 NOT NAMED | 14.3        | 88.4 | 15   | 0  |     |
| 1935 10 30    | 6 | 6 NOT NAMED | 32.6        | 60.9 | 35   | 0  |     |
| 1935 10 30 12 | 6 | NOT NAMED   | 32.8        | 61.8 | 35   | 0  |     |
| 1935 10 30 18 | 6 | NOT NAMED   | 33.0        | 62.8 | 40   | 0  |     |
| 1935 10 31    | 0 | 6 NOT NAMED | 33.1        | 63.7 | 40   | 0  |     |
| 1935 10 31    | 6 | 6 NOT NAMED | 33.3        | 64.5 | 45   | 0  |     |
| 1935 10 31 12 | 6 | NOT NAMED   | 33.4        | 65.3 | 50   | 0  |     |
| 1935 10 31 18 | 6 | NOT NAMED   | 33.5        | 66.6 | 55   | 0  |     |
| 1935 11       | 1 | 0           | 6 NOT NAMED | 33.7 | 68.1 | 60 | 0   |
| 1935 11       | 1 | 6           | 6 NOT NAMED | 33.7 | 69.7 | 60 | 0   |
| 1935 11       | 1 | 12          | 6 NOT NAMED | 33.6 | 71.2 | 65 | 0   |
| 1935 11       | 1 | 18          | 6 NOT NAMED | 33.5 | 72.6 | 70 | 0   |
| 1935 11       | 2 | 0           | 6 NOT NAMED | 33.2 | 73.8 | 70 | 0   |
| 1935 11       | 2 | 6           | 6 NOT NAMED | 32.8 | 75.0 | 70 | 980 |
| 1935 11       | 2 | 12          | 6 NOT NAMED | 32.2 | 75.7 | 70 | 0   |
| 1935 11       | 2 | 18          | 6 NOT NAMED | 31.6 | 75.9 | 70 | 0   |
| 1935 11       | 3 | 0           | 6 NOT NAMED | 30.9 | 76.0 | 70 | 0   |
| 1935 11       | 3 | 6           | 6 NOT NAMED | 30.2 | 76.0 | 70 | 0   |
| 1935 11       | 3 | 12          | 6 NOT NAMED | 29.5 | 76.1 | 70 | 0   |
| 1935 11       | 3 | 18          | 6 NOT NAMED | 28.6 | 76.4 | 65 | 0   |
| 1935 11       | 4 | 0           | 6 NOT NAMED | 27.7 | 77.1 | 65 | 0   |
| 1935 11       | 4 | 6           | 6 NOT NAMED | 27.0 | 77.9 | 65 | 0   |
| 1935 11       | 4 | 12          | 6 NOT NAMED | 26.5 | 78.7 | 65 | 0   |
| 1935 11       | 4 | 18          | 6 NOT NAMED | 25.8 | 80.3 | 65 | 973 |
| 1935 11       | 5 | 0           | 6 NOT NAMED | 25.3 | 81.1 | 65 | 0   |
| 1935 11       | 5 | 6           | 6 NOT NAMED | 24.9 | 82.5 | 65 | 0   |
| 1935 11       | 5 | 12          | 6 NOT NAMED | 24.9 | 83.5 | 65 | 0   |
| 1935 11       | 5 | 18          | 6 NOT NAMED | 25.1 | 84.3 | 65 | 0   |
| 1935 11       | 6 | 0           | 6 NOT NAMED | 25.2 | 85.0 | 60 | 0   |
| 1935 11       | 6 | 6           | 6 NOT NAMED | 25.5 | 85.7 | 60 | 0   |
| 1935 11       | 6 | 12          | 6 NOT NAMED | 26.0 | 86.3 | 55 | 0   |
| 1935 11       | 6 | 18          | 6 NOT NAMED | 26.4 | 86.7 | 50 | 0   |
| 1935 11       | 7 | 0           | 6 NOT NAMED | 26.8 | 87.0 | 45 | 0   |
| 1935 11       | 7 | 6           | 6 NOT NAMED | 27.5 | 87.1 | 40 | 0   |
| 1935 11       | 7 | 12          | 6 NOT NAMED | 28.0 | 86.9 | 35 | 0   |
| 1935 11       | 7 | 18          | 6 NOT NAMED | 28.1 | 85.8 | 30 | 0   |
| 1935 11       | 8 | 0           | 6 NOT NAMED | 27.8 | 84.7 | 25 | 0   |
| 1935 11       | 8 | 6           | 6 NOT NAMED | 27.7 | 84.2 | 20 | 0   |
| 1935 11       | 8 | 12          | 6 NOT NAMED | 27.6 | 83.7 | 15 | 0   |
| 1935 11       | 8 | 18          | 6 NOT NAMED | 27.5 | 83.4 | 15 | 0   |

|      |      |    |             |      |      |    |   |
|------|------|----|-------------|------|------|----|---|
| 1936 | 6 12 | 6  | 1 NOT NAMED | 16.3 | 87.5 | 35 | 0 |
| 1936 | 6 12 | 12 | 1 NOT NAMED | 18.0 | 87.1 | 35 | 0 |
| 1936 | 6 12 | 18 | 1 NOT NAMED | 19.4 | 86.8 | 35 | 0 |
| 1936 | 6 13 | 0  | 1 NOT NAMED | 20.6 | 86.6 | 40 | 0 |
| 1936 | 6 13 | 6  | 1 NOT NAMED | 21.6 | 86.5 | 40 | 0 |
| 1936 | 6 13 | 12 | 1 NOT NAMED | 22.5 | 86.5 | 40 | 0 |
| 1936 | 6 13 | 18 | 1 NOT NAMED | 23.4 | 86.4 | 40 | 0 |
| 1936 | 6 14 | 0  | 1 NOT NAMED | 24.1 | 86.2 | 40 | 0 |
| 1936 | 6 14 | 6  | 1 NOT NAMED | 24.6 | 85.9 | 40 | 0 |
| 1936 | 6 14 | 12 | 1 NOT NAMED | 25.0 | 85.6 | 40 | 0 |
| 1936 | 6 14 | 18 | 1 NOT NAMED | 25.5 | 85.0 | 40 | 0 |
| 1936 | 6 15 | 0  | 1 NOT NAMED | 26.0 | 84.0 | 40 | 0 |
| 1936 | 6 15 | 6  | 1 NOT NAMED | 25.9 | 82.3 | 40 | 0 |
| 1936 | 6 15 | 12 | 1 NOT NAMED | 25.7 | 80.1 | 35 | 0 |
| 1936 | 6 15 | 18 | 1 NOT NAMED | 26.1 | 77.7 | 35 | 0 |
| 1936 | 6 16 | 0  | 1 NOT NAMED | 27.1 | 75.1 | 35 | 0 |
| 1936 | 6 16 | 6  | 1 NOT NAMED | 28.8 | 72.1 | 35 | 0 |
| 1936 | 6 16 | 12 | 1 NOT NAMED | 30.5 | 69.2 | 35 | 0 |
| 1936 | 6 16 | 18 | 1 NOT NAMED | 32.1 | 67.0 | 30 | 0 |
| 1936 | 6 17 | 0  | 1 NOT NAMED | 33.6 | 65.4 | 30 | 0 |
| 1936 | 6 17 | 6  | 1 NOT NAMED | 35.8 | 63.3 | 25 | 0 |
| 1936 | 6 19 | 6  | 2 NOT NAMED | 22.3 | 89.0 | 35 | 0 |
| 1936 | 6 19 | 12 | 2 NOT NAMED | 23.2 | 90.1 | 35 | 0 |
| 1936 | 6 19 | 18 | 2 NOT NAMED | 23.5 | 90.6 | 35 | 0 |
| 1936 | 6 20 | 0  | 2 NOT NAMED | 23.8 | 91.2 | 35 | 0 |
| 1936 | 6 20 | 6  | 2 NOT NAMED | 24.2 | 91.9 | 35 | 0 |
| 1936 | 6 20 | 12 | 2 NOT NAMED | 24.6 | 92.7 | 35 | 0 |
| 1936 | 6 20 | 18 | 2 NOT NAMED | 25.0 | 93.7 | 35 | 0 |
| 1936 | 6 21 | 0  | 2 NOT NAMED | 25.2 | 94.7 | 35 | 0 |
| 1936 | 6 21 | 6  | 2 NOT NAMED | 25.0 | 95.7 | 35 | 0 |
| 1936 | 6 21 | 12 | 2 NOT NAMED | 24.7 | 96.6 | 35 | 0 |
| 1936 | 6 21 | 18 | 2 NOT NAMED | 24.4 | 97.1 | 35 | 0 |
| 1936 | 6 22 | 0  | 2 NOT NAMED | 24.0 | 98.1 | 35 | 0 |
| 1936 | 6 22 | 6  | 2 NOT NAMED | 23.7 | 98.7 | 25 | 0 |
| 1936 | 6 26 | 18 | 3 NOT NAMED | 26.2 | 95.5 | 35 | 0 |
| 1936 | 6 27 | 0  | 3 NOT NAMED | 26.7 | 96.0 | 65 | 0 |
| 1936 | 6 27 | 6  | 3 NOT NAMED | 27.0 | 96.3 | 70 | 0 |
| 1936 | 6 27 | 12 | 3 NOT NAMED | 27.4 | 96.8 | 70 | 0 |
| 1936 | 6 27 | 18 | 3 NOT NAMED | 28.0 | 97.4 | 60 | 0 |
| 1936 | 6 28 | 0  | 3 NOT NAMED | 28.6 | 98.0 | 35 | 0 |
| 1936 | 6 28 | 6  | 3 NOT NAMED | 29.1 | 98.5 | 30 | 0 |
| 1936 | 7 26 | 6  | 4 NOT NAMED | 23.3 | 84.5 | 35 | 0 |
| 1936 | 7 26 | 12 | 4 NOT NAMED | 23.8 | 86.0 | 35 | 0 |
| 1936 | 7 26 | 18 | 4 NOT NAMED | 24.4 | 87.6 | 35 | 0 |

|      |      |    |             |      |      |    |     |
|------|------|----|-------------|------|------|----|-----|
| 1936 | 7 27 | 0  | 4 NOT NAMED | 25.7 | 89.0 | 35 | 0   |
| 1936 | 7 27 | 6  | 4 NOT NAMED | 27.0 | 89.7 | 40 | 0   |
| 1936 | 7 27 | 12 | 4 NOT NAMED | 28.4 | 90.1 | 40 | 0   |
| 1936 | 7 27 | 18 | 4 NOT NAMED | 31.5 | 89.4 | 30 | 0   |
| 1936 | 7 27 | 6  | 5 NOT NAMED | 23.6 | 74.0 | 35 | 0   |
| 1936 | 7 27 | 12 | 5 NOT NAMED | 23.8 | 74.9 | 35 | 0   |
| 1936 | 7 27 | 18 | 5 NOT NAMED | 23.9 | 75.6 | 35 | 0   |
| 1936 | 7 28 | 0  | 5 NOT NAMED | 24.1 | 76.4 | 35 | 0   |
| 1936 | 7 28 | 6  | 5 NOT NAMED | 24.4 | 77.6 | 40 | 0   |
| 1936 | 7 28 | 12 | 5 NOT NAMED | 24.7 | 78.7 | 45 | 0   |
| 1936 | 7 28 | 18 | 5 NOT NAMED | 24.9 | 79.3 | 50 | 0   |
| 1936 | 7 29 | 0  | 5 NOT NAMED | 25.0 | 79.9 | 50 | 0   |
| 1936 | 7 29 | 6  | 5 NOT NAMED | 25.2 | 80.7 | 50 | 0   |
| 1936 | 7 29 | 12 | 5 NOT NAMED | 25.5 | 81.5 | 55 | 0   |
| 1936 | 7 29 | 18 | 5 NOT NAMED | 26.1 | 82.3 | 55 | 0   |
| 1936 | 7 30 | 0  | 5 NOT NAMED | 26.8 | 83.1 | 60 | 0   |
| 1936 | 7 30 | 6  | 5 NOT NAMED | 27.3 | 83.8 | 60 | 0   |
| 1936 | 7 30 | 12 | 5 NOT NAMED | 27.8 | 84.4 | 65 | 0   |
| 1936 | 7 30 | 18 | 5 NOT NAMED | 28.3 | 84.9 | 70 | 0   |
| 1936 | 7 31 | 0  | 5 NOT NAMED | 28.9 | 85.4 | 75 | 0   |
| 1936 | 7 31 | 6  | 5 NOT NAMED | 29.5 | 85.9 | 80 | 0   |
| 1936 | 7 31 | 12 | 5 NOT NAMED | 30.1 | 86.4 | 80 | 973 |
| 1936 | 7 31 | 18 | 5 NOT NAMED | 30.7 | 86.9 | 65 | 0   |
| 1936 | 8 1  | 0  | 5 NOT NAMED | 31.3 | 87.3 | 35 | 0   |
| 1936 | 8 1  | 6  | 5 NOT NAMED | 31.8 | 87.7 | 25 | 0   |
| 1936 | 8 1  | 12 | 5 NOT NAMED | 32.3 | 88.0 | 20 | 0   |
| 1936 | 8 4  | 6  | 6 NOT NAMED | 18.8 | 59.8 | 35 | 0   |
| 1936 | 8 4  | 12 | 6 NOT NAMED | 19.7 | 60.8 | 35 | 0   |
| 1936 | 8 4  | 18 | 6 NOT NAMED | 20.3 | 62.1 | 35 | 0   |
| 1936 | 8 5  | 0  | 6 NOT NAMED | 21.3 | 63.4 | 35 | 0   |
| 1936 | 8 5  | 6  | 6 NOT NAMED | 21.8 | 64.7 | 35 | 0   |
| 1936 | 8 5  | 12 | 6 NOT NAMED | 22.5 | 65.7 | 35 | 0   |
| 1936 | 8 5  | 18 | 6 NOT NAMED | 23.1 | 66.4 | 40 | 0   |
| 1936 | 8 6  | 0  | 6 NOT NAMED | 23.6 | 66.9 | 40 | 0   |
| 1936 | 8 6  | 6  | 6 NOT NAMED | 24.2 | 67.5 | 40 | 0   |
| 1936 | 8 6  | 12 | 6 NOT NAMED | 24.8 | 68.0 | 40 | 0   |
| 1936 | 8 6  | 18 | 6 NOT NAMED | 25.8 | 68.7 | 40 | 0   |
| 1936 | 8 7  | 0  | 6 NOT NAMED | 26.9 | 69.3 | 40 | 0   |
| 1936 | 8 7  | 6  | 6 NOT NAMED | 27.8 | 69.6 | 35 | 0   |
| 1936 | 8 7  | 12 | 6 NOT NAMED | 28.6 | 69.8 | 35 | 0   |
| 1936 | 8 7  | 18 | 6 NOT NAMED | 29.4 | 70.0 | 35 | 0   |
| 1936 | 8 8  | 0  | 6 NOT NAMED | 30.1 | 70.0 | 35 | 0   |
| 1936 | 8 8  | 6  | 6 NOT NAMED | 30.9 | 69.7 | 35 | 0   |
| 1936 | 8 8  | 12 | 6 NOT NAMED | 31.6 | 69.1 | 35 | 0   |



|      |   |    |    |             |      |      |    |   |
|------|---|----|----|-------------|------|------|----|---|
| 1936 | 8 | 8  | 18 | 6 NOT NAMED | 32.3 | 68.3 | 35 | 0 |
| 1936 | 8 | 9  | 0  | 6 NOT NAMED | 33.0 | 67.4 | 35 | 0 |
| 1936 | 8 | 9  | 6  | 6 NOT NAMED | 33.7 | 66.5 | 35 | 0 |
| 1936 | 8 | 9  | 12 | 6 NOT NAMED | 34.4 | 65.5 | 35 | 0 |
| 1936 | 8 | 9  | 18 | 6 NOT NAMED | 35.4 | 64.3 | 35 | 0 |
| 1936 | 8 | 10 | 0  | 6 NOT NAMED | 36.9 | 63.0 | 35 | 0 |
| 1936 | 8 | 10 | 6  | 6 NOT NAMED | 38.5 | 61.9 | 40 | 0 |
| 1936 | 8 | 10 | 12 | 6 NOT NAMED | 40.1 | 60.8 | 40 | 0 |
| 1936 | 8 | 10 | 18 | 6 NOT NAMED | 41.9 | 59.5 | 40 | 0 |
| 1936 | 8 | 7  | 6  | 7 NOT NAMED | 25.6 | 85.5 | 35 | 0 |
| 1936 | 8 | 7  | 12 | 7 NOT NAMED | 25.8 | 87.2 | 35 | 0 |
| 1936 | 8 | 7  | 18 | 7 NOT NAMED | 26.0 | 87.7 | 35 | 0 |
| 1936 | 8 | 8  | 0  | 7 NOT NAMED | 26.3 | 88.3 | 35 | 0 |
| 1936 | 8 | 8  | 6  | 7 NOT NAMED | 26.6 | 89.0 | 35 | 0 |
| 1936 | 8 | 8  | 12 | 7 NOT NAMED | 26.9 | 89.6 | 35 | 0 |
| 1936 | 8 | 8  | 18 | 7 NOT NAMED | 27.2 | 90.0 | 35 | 0 |
| 1936 | 8 | 9  | 0  | 7 NOT NAMED | 27.4 | 90.4 | 35 | 0 |
| 1936 | 8 | 9  | 6  | 7 NOT NAMED | 27.6 | 90.8 | 35 | 0 |
| 1936 | 8 | 9  | 12 | 7 NOT NAMED | 27.8 | 91.3 | 35 | 0 |
| 1936 | 8 | 9  | 18 | 7 NOT NAMED | 27.9 | 91.8 | 35 | 0 |
| 1936 | 8 | 10 | 0  | 7 NOT NAMED | 28.0 | 92.3 | 35 | 0 |
| 1936 | 8 | 10 | 6  | 7 NOT NAMED | 28.0 | 92.7 | 35 | 0 |
| 1936 | 8 | 10 | 12 | 7 NOT NAMED | 27.8 | 93.1 | 35 | 0 |
| 1936 | 8 | 10 | 18 | 7 NOT NAMED | 27.3 | 93.7 | 35 | 0 |
| 1936 | 8 | 11 | 0  | 7 NOT NAMED | 26.7 | 94.3 | 35 | 0 |
| 1936 | 8 | 11 | 6  | 7 NOT NAMED | 26.3 | 94.6 | 35 | 0 |
| 1936 | 8 | 11 | 12 | 7 NOT NAMED | 25.8 | 94.9 | 35 | 0 |
| 1936 | 8 | 11 | 18 | 7 NOT NAMED | 25.3 | 95.2 | 35 | 0 |
| 1936 | 8 | 12 | 0  | 7 NOT NAMED | 24.7 | 95.7 | 35 | 0 |
| 1936 | 8 | 12 | 6  | 7 NOT NAMED | 24.0 | 96.5 | 35 | 0 |
| 1936 | 8 | 12 | 12 | 7 NOT NAMED | 23.3 | 97.3 | 35 | 0 |
| 1936 | 8 | 12 | 18 | 7 NOT NAMED | 22.4 | 98.6 | 30 | 0 |
| 1936 | 8 | 15 | 6  | 8 NOT NAMED | 20.4 | 87.0 | 60 | 0 |
| 1936 | 8 | 15 | 12 | 8 NOT NAMED | 21.2 | 87.2 | 50 | 0 |
| 1936 | 8 | 15 | 18 | 8 NOT NAMED | 22.1 | 87.5 | 35 | 0 |
| 1936 | 8 | 16 | 0  | 8 NOT NAMED | 22.9 | 88.1 | 40 | 0 |
| 1936 | 8 | 16 | 6  | 8 NOT NAMED | 23.6 | 89.0 | 55 | 0 |
| 1936 | 8 | 16 | 12 | 8 NOT NAMED | 24.2 | 89.9 | 65 | 0 |
| 1936 | 8 | 16 | 18 | 8 NOT NAMED | 24.6 | 90.7 | 65 | 0 |
| 1936 | 8 | 17 | 0  | 8 NOT NAMED | 24.8 | 91.4 | 65 | 0 |
| 1936 | 8 | 17 | 6  | 8 NOT NAMED | 24.8 | 92.9 | 70 | 0 |
| 1936 | 8 | 17 | 12 | 8 NOT NAMED | 24.6 | 94.2 | 70 | 0 |
| 1936 | 8 | 17 | 18 | 8 NOT NAMED | 24.3 | 94.6 | 70 | 0 |
| 1936 | 8 | 18 | 0  | 8 NOT NAMED | 24.0 | 95.0 | 70 | 0 |

|      |      |       |             |      |      |    |   |
|------|------|-------|-------------|------|------|----|---|
| 1936 | 8 18 | 6     | 8 NOT NAMED | 23.8 | 95.4 | 70 | 0 |
| 1936 | 8 18 | 12    | 8 NOT NAMED | 23.5 | 95.9 | 70 | 0 |
| 1936 | 8 18 | 18    | 8 NOT NAMED | 23.0 | 96.6 | 70 | 0 |
| 1936 | 8 19 | 0     | 8 NOT NAMED | 22.6 | 97.2 | 70 | 0 |
| 1936 | 8 19 | 6     | 8 NOT NAMED | 22.4 | 97.7 | 65 | 0 |
| 1936 | 8 19 | 12    | 8 NOT NAMED | 22.1 | 98.1 | 65 | 0 |
| 1936 | 8 19 | 18    | 8 NOT NAMED | 21.8 | 98.4 | 45 | 0 |
| 1936 | 8 20 | 6     | 9 NOT NAMED | 25.5 | 75.3 | 35 | 0 |
| 1936 | 8 20 | 12    | 9 NOT NAMED | 26.0 | 75.5 | 35 | 0 |
| 1936 | 8 20 | 18    | 9 NOT NAMED | 26.5 | 75.9 | 35 | 0 |
| 1936 | 8 21 | 0     | 9 NOT NAMED | 27.0 | 76.5 | 35 | 0 |
| 1936 | 8 21 | 6     | 9 NOT NAMED | 27.6 | 77.3 | 40 | 0 |
| 1936 | 8 21 | 12    | 9 NOT NAMED | 28.3 | 78.5 | 45 | 0 |
| 1936 | 8 21 | 18    | 9 NOT NAMED | 29.1 | 80.1 | 45 | 0 |
| 1936 | 8 22 | 0     | 9 NOT NAMED | 29.8 | 81.7 | 40 | 0 |
| 1936 | 8 22 | 6     | 9 NOT NAMED | 30.1 | 83.1 | 35 | 0 |
| 1936 | 8 22 | 12    | 9 NOT NAMED | 30.3 | 84.6 | 30 | 0 |
| 1936 | 8 22 | 18    | 9 NOT NAMED | 30.4 | 86.2 | 25 | 0 |
| 1936 | 8 23 | 0     | 9 NOT NAMED | 30.4 | 88.1 | 25 | 0 |
| 1936 | 8 23 | 6     | 9 NOT NAMED | 30.3 | 89.1 | 20 | 0 |
| 1936 | 8 28 | 6 10  | NOT NAMED   | 18.3 | 86.3 | 40 | 0 |
| 1936 | 8 28 | 12 10 | NOT NAMED   | 19.3 | 88.5 | 35 | 0 |
| 1936 | 8 28 | 18 10 | NOT NAMED   | 19.7 | 89.2 | 40 | 0 |
| 1936 | 8 29 | 0 10  | NOT NAMED   | 20.2 | 90.3 | 45 | 0 |
| 1936 | 8 29 | 6 10  | NOT NAMED   | 20.8 | 91.8 | 55 | 0 |
| 1936 | 8 29 | 12 10 | NOT NAMED   | 21.4 | 93.3 | 65 | 0 |
| 1936 | 8 29 | 18 10 | NOT NAMED   | 21.6 | 94.6 | 70 | 0 |
| 1936 | 8 30 | 0 10  | NOT NAMED   | 21.3 | 95.6 | 70 | 0 |
| 1936 | 8 30 | 6 10  | NOT NAMED   | 20.9 | 96.4 | 70 | 0 |
| 1936 | 8 30 | 12 10 | NOT NAMED   | 20.4 | 97.3 | 65 | 0 |
| 1936 | 8 30 | 18 10 | NOT NAMED   | 19.1 | 97.0 | 35 | 0 |
| 1936 | 8 28 | 6 11  | NOT NAMED   | 17.2 | 40.0 | 65 | 0 |
| 1936 | 8 28 | 12 11 | NOT NAMED   | 17.3 | 43.3 | 70 | 0 |
| 1936 | 8 28 | 18 11 | NOT NAMED   | 17.4 | 44.3 | 70 | 0 |
| 1936 | 8 29 | 0 11  | NOT NAMED   | 17.6 | 45.1 | 70 | 0 |
| 1936 | 8 29 | 6 11  | NOT NAMED   | 17.8 | 45.8 | 75 | 0 |
| 1936 | 8 29 | 12 11 | NOT NAMED   | 18.0 | 46.5 | 75 | 0 |
| 1936 | 8 29 | 18 11 | NOT NAMED   | 18.2 | 47.3 | 75 | 0 |
| 1936 | 8 30 | 0 11  | NOT NAMED   | 18.5 | 48.0 | 80 | 0 |
| 1936 | 8 30 | 6 11  | NOT NAMED   | 18.8 | 48.6 | 80 | 0 |
| 1936 | 8 30 | 12 11 | NOT NAMED   | 19.3 | 49.3 | 80 | 0 |
| 1936 | 8 30 | 18 11 | NOT NAMED   | 20.0 | 50.2 | 80 | 0 |
| 1936 | 8 31 | 0 11  | NOT NAMED   | 20.8 | 51.2 | 85 | 0 |
| 1936 | 8 31 | 6 11  | NOT NAMED   | 21.5 | 52.0 | 85 | 0 |

|      |   |    |    |    |           |      |      |    |   |
|------|---|----|----|----|-----------|------|------|----|---|
| 1936 | 8 | 31 | 12 | 11 | NOT NAMED | 22.2 | 52.8 | 85 | 0 |
| 1936 | 8 | 31 | 18 | 11 | NOT NAMED | 23.1 | 53.8 | 90 | 0 |
| 1936 | 9 | 1  | 0  | 11 | NOT NAMED | 24.1 | 54.9 | 90 | 0 |
| 1936 | 9 | 1  | 6  | 11 | NOT NAMED | 25.1 | 55.8 | 90 | 0 |
| 1936 | 9 | 1  | 12 | 11 | NOT NAMED | 26.1 | 56.6 | 90 | 0 |
| 1936 | 9 | 1  | 18 | 11 | NOT NAMED | 27.4 | 57.6 | 95 | 0 |
| 1936 | 9 | 2  | 0  | 11 | NOT NAMED | 28.7 | 58.5 | 95 | 0 |
| 1936 | 9 | 2  | 6  | 11 | NOT NAMED | 29.4 | 58.8 | 95 | 0 |
| 1936 | 9 | 2  | 12 | 11 | NOT NAMED | 30.1 | 58.9 | 95 | 0 |
| 1936 | 9 | 2  | 18 | 11 | NOT NAMED | 31.5 | 58.5 | 95 | 0 |
| 1936 | 9 | 3  | 0  | 11 | NOT NAMED | 33.0 | 56.2 | 95 | 0 |
| 1936 | 9 | 3  | 6  | 11 | NOT NAMED | 34.1 | 54.3 | 95 | 0 |
| 1936 | 9 | 3  | 12 | 11 | NOT NAMED | 35.2 | 52.5 | 95 | 0 |
| 1936 | 9 | 3  | 18 | 11 | NOT NAMED | 36.7 | 50.8 | 95 | 0 |
| 1936 | 9 | 4  | 0  | 11 | NOT NAMED | 38.2 | 49.2 | 90 | 0 |
| 1936 | 9 | 4  | 6  | 11 | NOT NAMED | 39.6 | 47.6 | 90 | 0 |
| 1936 | 9 | 4  | 12 | 11 | NOT NAMED | 40.9 | 46.0 | 85 | 0 |
| 1936 | 9 | 4  | 18 | 11 | NOT NAMED | 41.8 | 45.0 | 85 | 0 |
| 1936 | 9 | 5  | 0  | 11 | NOT NAMED | 42.7 | 43.3 | 80 | 0 |
| 1936 | 9 | 5  | 6  | 11 | NOT NAMED | 43.8 | 41.2 | 80 | 0 |
| 1936 | 9 | 5  | 12 | 11 | NOT NAMED | 44.9 | 37.2 | 75 | 0 |
| 1936 | 9 | 5  | 18 | 11 | NOT NAMED | 46.0 | 32.9 | 70 | 0 |
| 1936 | 9 | 6  | 0  | 11 | NOT NAMED | 47.2 | 27.8 | 65 | 0 |
| 1936 | 9 | 6  | 6  | 11 | NOT NAMED | 48.6 | 22.0 | 60 | 0 |
| 1936 | 9 | 6  | 12 | 11 | NOT NAMED | 50.0 | 16.2 | 60 | 0 |
| 1936 | 9 | 6  | 18 | 11 | NOT NAMED | 52.0 | 14.6 | 55 | 0 |
| 1936 | 9 | 7  | 6  | 12 | NOT NAMED | 20.8 | 56.9 | 35 | 0 |
| 1936 | 9 | 7  | 12 | 12 | NOT NAMED | 20.8 | 58.8 | 35 | 0 |
| 1936 | 9 | 7  | 18 | 12 | NOT NAMED | 20.9 | 60.3 | 35 | 0 |
| 1936 | 9 | 8  | 0  | 12 | NOT NAMED | 21.2 | 62.0 | 35 | 0 |
| 1936 | 9 | 8  | 6  | 12 | NOT NAMED | 21.4 | 62.8 | 30 | 0 |
| 1936 | 9 | 8  | 6  | 13 | NOT NAMED | 13.1 | 48.5 | 40 | 0 |
| 1936 | 9 | 8  | 12 | 13 | NOT NAMED | 13.6 | 49.1 | 40 | 0 |
| 1936 | 9 | 8  | 18 | 13 | NOT NAMED | 14.2 | 49.8 | 40 | 0 |
| 1936 | 9 | 9  | 0  | 13 | NOT NAMED | 14.6 | 50.4 | 40 | 0 |
| 1936 | 9 | 9  | 6  | 13 | NOT NAMED | 15.0 | 51.0 | 45 | 0 |
| 1936 | 9 | 9  | 12 | 13 | NOT NAMED | 15.4 | 51.7 | 45 | 0 |
| 1936 | 9 | 9  | 18 | 13 | NOT NAMED | 16.0 | 52.5 | 45 | 0 |
| 1936 | 9 | 10 | 0  | 13 | NOT NAMED | 16.6 | 53.4 | 50 | 0 |
| 1936 | 9 | 10 | 6  | 13 | NOT NAMED | 17.2 | 54.3 | 55 | 0 |
| 1936 | 9 | 10 | 12 | 13 | NOT NAMED | 17.8 | 55.2 | 55 | 0 |
| 1936 | 9 | 10 | 18 | 13 | NOT NAMED | 18.3 | 56.0 | 65 | 0 |
| 1936 | 9 | 11 | 0  | 13 | NOT NAMED | 18.7 | 56.8 | 65 | 0 |
| 1936 | 9 | 11 | 6  | 13 | NOT NAMED | 19.3 | 57.8 | 70 | 0 |

|      |            |           |      |      |     |     |
|------|------------|-----------|------|------|-----|-----|
| 1936 | 9 11 12 13 | NOT NAMED | 19.9 | 58.7 | 75  | 0   |
| 1936 | 9 11 18 13 | NOT NAMED | 20.2 | 59.1 | 80  | 0   |
| 1936 | 9 12 0 13  | NOT NAMED | 20.4 | 59.3 | 80  | 0   |
| 1936 | 9 12 6 13  | NOT NAMED | 20.8 | 59.5 | 85  | 0   |
| 1936 | 9 12 12 13 | NOT NAMED | 21.2 | 59.8 | 85  | 0   |
| 1936 | 9 12 18 13 | NOT NAMED | 21.5 | 60.1 | 85  | 0   |
| 1936 | 9 13 0 13  | NOT NAMED | 21.7 | 60.4 | 85  | 0   |
| 1936 | 9 13 6 13  | NOT NAMED | 22.3 | 61.0 | 85  | 0   |
| 1936 | 9 13 12 13 | NOT NAMED | 22.9 | 61.7 | 85  | 0   |
| 1936 | 9 13 18 13 | NOT NAMED | 23.2 | 62.0 | 90  | 0   |
| 1936 | 9 14 0 13  | NOT NAMED | 23.4 | 62.3 | 90  | 0   |
| 1936 | 9 14 6 13  | NOT NAMED | 23.6 | 62.5 | 90  | 0   |
| 1936 | 9 14 12 13 | NOT NAMED | 23.8 | 62.7 | 95  | 0   |
| 1936 | 9 14 18 13 | NOT NAMED | 24.2 | 63.1 | 95  | 0   |
| 1936 | 9 15 0 13  | NOT NAMED | 24.8 | 63.6 | 100 | 0   |
| 1936 | 9 15 6 13  | NOT NAMED | 25.5 | 64.3 | 100 | 0   |
| 1936 | 9 15 12 13 | NOT NAMED | 26.2 | 65.0 | 100 | 0   |
| 1936 | 9 15 18 13 | NOT NAMED | 26.9 | 65.7 | 105 | 0   |
| 1936 | 9 16 0 13  | NOT NAMED | 27.7 | 66.5 | 105 | 0   |
| 1936 | 9 16 6 13  | NOT NAMED | 28.2 | 66.9 | 105 | 0   |
| 1936 | 9 16 12 13 | NOT NAMED | 28.7 | 67.5 | 105 | 0   |
| 1936 | 9 16 18 13 | NOT NAMED | 29.8 | 68.8 | 100 | 0   |
| 1936 | 9 17 0 13  | NOT NAMED | 31.0 | 70.1 | 100 | 0   |
| 1936 | 9 17 6 13  | NOT NAMED | 31.7 | 71.2 | 100 | 0   |
| 1936 | 9 17 12 13 | NOT NAMED | 32.4 | 72.3 | 95  | 0   |
| 1936 | 9 17 18 13 | NOT NAMED | 33.5 | 73.4 | 95  | 0   |
| 1936 | 9 18 0 13  | NOT NAMED | 34.6 | 74.5 | 90  | 0   |
| 1936 | 9 18 6 13  | NOT NAMED | 35.2 | 75.1 | 90  | 0   |
| 1936 | 9 18 12 13 | NOT NAMED | 35.9 | 75.3 | 85  | 968 |
| 1936 | 9 18 18 13 | NOT NAMED | 37.2 | 75.0 | 85  | 0   |
| 1936 | 9 19 0 13  | NOT NAMED | 38.6 | 74.0 | 85  | 0   |
| 1936 | 9 19 6 13  | NOT NAMED | 40.2 | 72.1 | 80  | 0   |
| 1936 | 9 19 12 13 | NOT NAMED | 41.7 | 69.0 | 80  | 0   |
| 1936 | 9 19 18 13 | NOT NAMED | 42.9 | 65.1 | 75  | 0   |
| 1936 | 9 20 0 13  | NOT NAMED | 43.9 | 61.0 | 75  | 0   |
| 1936 | 9 20 6 13  | NOT NAMED | 44.8 | 56.5 | 70  | 0   |
| 1936 | 9 20 12 13 | NOT NAMED | 45.4 | 52.3 | 70  | 0   |
| 1936 | 9 20 18 13 | NOT NAMED | 45.5 | 48.9 | 65  | 0   |
| 1936 | 9 21 0 13  | NOT NAMED | 45.7 | 46.0 | 65  | 0   |
| 1936 | 9 21 6 13  | NOT NAMED | 45.8 | 43.1 | 65  | 0   |
| 1936 | 9 21 12 13 | NOT NAMED | 46.0 | 40.6 | 60  | 0   |
| 1936 | 9 21 18 13 | NOT NAMED | 46.2 | 38.8 | 60  | 0   |
| 1936 | 9 22 0 13  | NOT NAMED | 46.3 | 37.3 | 55  | 0   |
| 1936 | 9 22 6 13  | NOT NAMED | 46.7 | 35.9 | 55  | 0   |

|      |            |           |      |       |    |   |
|------|------------|-----------|------|-------|----|---|
| 1936 | 9 22 12 13 | NOT NAMED | 47.2 | 34.6  | 50 | 0 |
| 1936 | 9 22 18 13 | NOT NAMED | 47.8 | 33.7  | 50 | 0 |
| 1936 | 9 23 0 13  | NOT NAMED | 48.6 | 32.9  | 45 | 0 |
| 1936 | 9 23 6 13  | NOT NAMED | 50.0 | 31.5  | 45 | 0 |
| 1936 | 9 23 12 13 | NOT NAMED | 51.3 | 30.3  | 45 | 0 |
| 1936 | 9 23 18 13 | NOT NAMED | 51.8 | 29.8  | 40 | 0 |
| 1936 | 9 24 0 13  | NOT NAMED | 52.1 | 29.2  | 40 | 0 |
| 1936 | 9 24 6 13  | NOT NAMED | 52.4 | 28.6  | 35 | 0 |
| 1936 | 9 24 12 13 | NOT NAMED | 52.7 | 28.1  | 35 | 0 |
| 1936 | 9 24 18 13 | NOT NAMED | 52.9 | 27.7  | 30 | 0 |
| 1936 | 9 25 0 13  | NOT NAMED | 53.0 | 27.3  | 30 | 0 |
| 1936 | 9 25 6 13  | NOT NAMED | 53.1 | 26.8  | 30 | 0 |
| 1936 | 9 25 12 13 | NOT NAMED | 53.2 | 26.2  | 30 | 0 |
| 1936 | 9 25 18 13 | NOT NAMED | 53.7 | 24.4  | 30 | 0 |
| 1936 | 9 10 6 14  | NOT NAMED | 19.0 | 93.2  | 35 | 0 |
| 1936 | 9 10 12 14 | NOT NAMED | 19.0 | 93.9  | 35 | 0 |
| 1936 | 9 10 18 14 | NOT NAMED | 18.9 | 94.3  | 35 | 0 |
| 1936 | 9 11 0 14  | NOT NAMED | 19.0 | 94.6  | 35 | 0 |
| 1936 | 9 11 6 14  | NOT NAMED | 19.2 | 94.7  | 35 | 0 |
| 1936 | 9 11 12 14 | NOT NAMED | 19.6 | 94.7  | 35 | 0 |
| 1936 | 9 11 18 14 | NOT NAMED | 20.1 | 94.6  | 40 | 0 |
| 1936 | 9 12 0 14  | NOT NAMED | 20.8 | 94.4  | 40 | 0 |
| 1936 | 9 12 6 14  | NOT NAMED | 21.5 | 94.4  | 40 | 0 |
| 1936 | 9 12 12 14 | NOT NAMED | 22.4 | 94.6  | 40 | 0 |
| 1936 | 9 12 18 14 | NOT NAMED | 23.4 | 95.1  | 40 | 0 |
| 1936 | 9 13 0 14  | NOT NAMED | 24.3 | 95.8  | 40 | 0 |
| 1936 | 9 13 6 14  | NOT NAMED | 25.3 | 96.6  | 40 | 0 |
| 1936 | 9 13 12 14 | NOT NAMED | 26.2 | 97.4  | 35 | 0 |
| 1936 | 9 13 18 14 | NOT NAMED | 26.9 | 98.0  | 30 | 0 |
| 1936 | 9 14 0 14  | NOT NAMED | 27.3 | 98.6  | 25 | 0 |
| 1936 | 9 14 6 14  | NOT NAMED | 27.7 | 99.2  | 25 | 0 |
| 1936 | 9 14 12 14 | NOT NAMED | 28.1 | 99.7  | 20 | 0 |
| 1936 | 9 14 18 14 | NOT NAMED | 28.6 | 100.7 | 15 | 0 |
| 1936 | 9 19 6 15  | NOT NAMED | 20.3 | 63.0  | 40 | 0 |
| 1936 | 9 19 12 15 | NOT NAMED | 20.7 | 63.8  | 45 | 0 |
| 1936 | 9 19 18 15 | NOT NAMED | 21.2 | 64.5  | 45 | 0 |
| 1936 | 9 20 0 15  | NOT NAMED | 21.9 | 65.4  | 50 | 0 |
| 1936 | 9 20 6 15  | NOT NAMED | 23.0 | 66.7  | 60 | 0 |
| 1936 | 9 20 12 15 | NOT NAMED | 23.9 | 67.8  | 65 | 0 |
| 1936 | 9 20 18 15 | NOT NAMED | 24.5 | 68.5  | 70 | 0 |
| 1936 | 9 21 0 15  | NOT NAMED | 25.1 | 69.3  | 75 | 0 |
| 1936 | 9 21 6 15  | NOT NAMED | 25.7 | 70.0  | 80 | 0 |
| 1936 | 9 21 12 15 | NOT NAMED | 26.3 | 70.8  | 85 | 0 |
| 1936 | 9 21 18 15 | NOT NAMED | 27.1 | 71.2  | 90 | 0 |

|      |    |    |    |    |           |      |      |    |   |
|------|----|----|----|----|-----------|------|------|----|---|
| 1936 | 9  | 22 | 0  | 15 | NOT NAMED | 27.8 | 71.1 | 90 | 0 |
| 1936 | 9  | 22 | 6  | 15 | NOT NAMED | 28.3 | 70.7 | 90 | 0 |
| 1936 | 9  | 22 | 12 | 15 | NOT NAMED | 28.7 | 70.2 | 95 | 0 |
| 1936 | 9  | 22 | 18 | 15 | NOT NAMED | 29.2 | 69.6 | 95 | 0 |
| 1936 | 9  | 23 | 0  | 15 | NOT NAMED | 29.8 | 69.1 | 95 | 0 |
| 1936 | 9  | 23 | 6  | 15 | NOT NAMED | 30.5 | 68.7 | 95 | 0 |
| 1936 | 9  | 23 | 12 | 15 | NOT NAMED | 31.6 | 68.4 | 95 | 0 |
| 1936 | 9  | 23 | 18 | 15 | NOT NAMED | 33.0 | 68.4 | 95 | 0 |
| 1936 | 9  | 24 | 0  | 15 | NOT NAMED | 34.8 | 68.4 | 90 | 0 |
| 1936 | 9  | 24 | 6  | 15 | NOT NAMED | 36.7 | 68.5 | 85 | 0 |
| 1936 | 9  | 24 | 12 | 15 | NOT NAMED | 38.6 | 68.6 | 80 | 0 |
| 1936 | 9  | 24 | 18 | 15 | NOT NAMED | 40.5 | 68.1 | 75 | 0 |
| 1936 | 9  | 25 | 0  | 15 | NOT NAMED | 42.3 | 66.9 | 75 | 0 |
| 1936 | 9  | 25 | 6  | 15 | NOT NAMED | 44.5 | 65.0 | 70 | 0 |
| 1936 | 10 | 9  | 18 | 16 | NOT NAMED | 19.3 | 91.3 | 35 | 0 |
| 1936 | 10 | 10 | 0  | 16 | NOT NAMED | 19.6 | 91.5 | 35 | 0 |
| 1936 | 10 | 10 | 6  | 16 | NOT NAMED | 19.7 | 91.6 | 35 | 0 |
| 1936 | 10 | 10 | 12 | 16 | NOT NAMED | 19.8 | 91.9 | 35 | 0 |
| 1936 | 10 | 10 | 18 | 16 | NOT NAMED | 19.2 | 92.8 | 35 | 0 |
| 1936 | 10 | 11 | 0  | 16 | NOT NAMED | 18.2 | 92.8 | 35 | 0 |
| 1936 | 10 | 11 | 6  | 16 | NOT NAMED | 17.4 | 92.8 | 30 | 0 |
| 1936 | 10 | 11 | 12 | 16 | NOT NAMED | 16.7 | 92.8 | 25 | 0 |
| 1936 | 10 | 11 | 18 | 16 | NOT NAMED | 16.2 | 92.7 | 20 | 0 |
| 1937 | 7  | 29 | 12 | 1  | NOT NAMED | 26.2 | 84.3 | 40 | 0 |
| 1937 | 7  | 29 | 18 | 1  | NOT NAMED | 27.4 | 83.4 | 40 | 0 |
| 1937 | 7  | 30 | 0  | 1  | NOT NAMED | 28.4 | 82.4 | 40 | 0 |
| 1937 | 7  | 30 | 6  | 1  | NOT NAMED | 29.3 | 81.3 | 40 | 0 |
| 1937 | 7  | 30 | 12 | 1  | NOT NAMED | 30.1 | 80.1 | 35 | 0 |
| 1937 | 7  | 30 | 18 | 1  | NOT NAMED | 31.3 | 78.9 | 35 | 0 |
| 1937 | 7  | 31 | 0  | 1  | NOT NAMED | 32.6 | 77.8 | 40 | 0 |
| 1937 | 7  | 31 | 6  | 1  | NOT NAMED | 33.3 | 77.2 | 45 | 0 |
| 1937 | 7  | 31 | 12 | 1  | NOT NAMED | 34.2 | 76.4 | 45 | 0 |
| 1937 | 7  | 31 | 18 | 1  | NOT NAMED | 36.0 | 74.4 | 60 | 0 |
| 1937 | 8  | 1  | 0  | 1  | NOT NAMED | 37.9 | 71.6 | 60 | 0 |
| 1937 | 8  | 1  | 6  | 1  | NOT NAMED | 39.6 | 69.2 | 55 | 0 |
| 1937 | 8  | 1  | 12 | 1  | NOT NAMED | 41.1 | 66.8 | 50 | 0 |
| 1937 | 8  | 1  | 18 | 1  | NOT NAMED | 42.5 | 64.8 | 45 | 0 |
| 1937 | 8  | 2  | 0  | 1  | NOT NAMED | 43.8 | 64.3 | 40 | 0 |
| 1937 | 8  | 2  | 6  | 1  | NOT NAMED | 45.2 | 64.5 | 35 | 0 |
| 1937 | 8  | 2  | 12 | 1  | NOT NAMED | 46.5 | 65.2 | 30 | 0 |
| 1937 | 8  | 2  | 18 | 1  | NOT NAMED | 47.1 | 66.1 | 25 | 0 |
| 1937 | 8  | 2  | 18 | 2  | NOT NAMED | 22.8 | 73.5 | 35 | 0 |
| 1937 | 8  | 3  | 0  | 2  | NOT NAMED | 23.8 | 76.1 | 35 | 0 |
| 1937 | 8  | 3  | 6  | 2  | NOT NAMED | 24.4 | 76.4 | 35 | 0 |

|      |   |    |    |             |      |      |    |   |
|------|---|----|----|-------------|------|------|----|---|
| 1937 | 8 | 3  | 12 | 2 NOT NAMED | 25.1 | 76.7 | 35 | 0 |
| 1937 | 8 | 3  | 18 | 2 NOT NAMED | 25.9 | 76.9 | 35 | 0 |
| 1937 | 8 | 4  | 0  | 2 NOT NAMED | 26.7 | 77.0 | 35 | 0 |
| 1937 | 8 | 4  | 6  | 2 NOT NAMED | 27.5 | 77.1 | 35 | 0 |
| 1937 | 8 | 4  | 12 | 2 NOT NAMED | 28.3 | 77.1 | 35 | 0 |
| 1937 | 8 | 4  | 18 | 2 NOT NAMED | 29.0 | 77.1 | 35 | 0 |
| 1937 | 8 | 5  | 0  | 2 NOT NAMED | 29.6 | 77.1 | 40 | 0 |
| 1937 | 8 | 5  | 6  | 2 NOT NAMED | 30.3 | 77.0 | 40 | 0 |
| 1937 | 8 | 5  | 12 | 2 NOT NAMED | 31.2 | 76.8 | 40 | 0 |
| 1937 | 8 | 5  | 18 | 2 NOT NAMED | 32.3 | 76.3 | 45 | 0 |
| 1937 | 8 | 6  | 0  | 2 NOT NAMED | 33.5 | 75.5 | 45 | 0 |
| 1937 | 8 | 6  | 6  | 2 NOT NAMED | 34.5 | 74.7 | 50 | 0 |
| 1937 | 8 | 6  | 12 | 2 NOT NAMED | 35.4 | 73.8 | 50 | 0 |
| 1937 | 8 | 6  | 18 | 2 NOT NAMED | 36.4 | 73.1 | 50 | 0 |
| 1937 | 8 | 7  | 0  | 2 NOT NAMED | 37.4 | 72.3 | 50 | 0 |
| 1937 | 8 | 7  | 6  | 2 NOT NAMED | 39.0 | 71.0 | 50 | 0 |
| 1937 | 8 | 7  | 12 | 2 NOT NAMED | 40.6 | 68.8 | 45 | 0 |
| 1937 | 8 | 7  | 18 | 2 NOT NAMED | 41.6 | 67.4 | 45 | 0 |
| 1937 | 8 | 8  | 0  | 2 NOT NAMED | 42.2 | 66.2 | 40 | 0 |
| 1937 | 8 | 8  | 6  | 2 NOT NAMED | 42.7 | 65.0 | 40 | 0 |
| 1937 | 8 | 8  | 12 | 2 NOT NAMED | 42.9 | 63.9 | 35 | 0 |
| 1937 | 8 | 8  | 18 | 2 NOT NAMED | 43.5 | 60.5 | 35 | 0 |
| 1937 | 8 | 24 | 12 | 3 NOT NAMED | 18.3 | 60.7 | 35 | 0 |
| 1937 | 8 | 24 | 18 | 3 NOT NAMED | 18.8 | 62.4 | 35 | 0 |
| 1937 | 8 | 25 | 0  | 3 NOT NAMED | 19.3 | 63.7 | 35 | 0 |
| 1937 | 8 | 25 | 6  | 3 NOT NAMED | 19.8 | 64.6 | 35 | 0 |
| 1937 | 8 | 25 | 12 | 3 NOT NAMED | 20.3 | 65.5 | 35 | 0 |
| 1937 | 8 | 25 | 18 | 3 NOT NAMED | 20.8 | 66.5 | 35 | 0 |
| 1937 | 8 | 26 | 0  | 3 NOT NAMED | 21.4 | 67.4 | 35 | 0 |
| 1937 | 8 | 26 | 6  | 3 NOT NAMED | 21.9 | 68.3 | 35 | 0 |
| 1937 | 8 | 26 | 12 | 3 NOT NAMED | 22.4 | 69.2 | 35 | 0 |
| 1937 | 8 | 26 | 18 | 3 NOT NAMED | 22.9 | 70.2 | 35 | 0 |
| 1937 | 8 | 27 | 0  | 3 NOT NAMED | 23.5 | 71.2 | 35 | 0 |
| 1937 | 8 | 27 | 6  | 3 NOT NAMED | 24.0 | 72.5 | 35 | 0 |
| 1937 | 8 | 27 | 12 | 3 NOT NAMED | 24.4 | 73.9 | 35 | 0 |
| 1937 | 8 | 27 | 18 | 3 NOT NAMED | 24.6 | 74.7 | 35 | 0 |
| 1937 | 8 | 28 | 0  | 3 NOT NAMED | 24.7 | 75.3 | 35 | 0 |
| 1937 | 8 | 28 | 6  | 3 NOT NAMED | 24.7 | 76.9 | 35 | 0 |
| 1937 | 8 | 28 | 12 | 3 NOT NAMED | 25.0 | 78.1 | 40 | 0 |
| 1937 | 8 | 28 | 18 | 3 NOT NAMED | 25.3 | 78.2 | 40 | 0 |
| 1937 | 8 | 29 | 0  | 3 NOT NAMED | 25.8 | 78.3 | 40 | 0 |
| 1937 | 8 | 29 | 6  | 3 NOT NAMED | 26.3 | 78.5 | 40 | 0 |
| 1937 | 8 | 29 | 12 | 3 NOT NAMED | 26.8 | 78.7 | 45 | 0 |
| 1937 | 8 | 29 | 18 | 3 NOT NAMED | 27.4 | 79.0 | 45 | 0 |

|      |   |    |    |             |      |      |    |   |
|------|---|----|----|-------------|------|------|----|---|
| 1937 | 8 | 30 | 0  | 3 NOT NAMED | 28.0 | 79.3 | 50 | 0 |
| 1937 | 8 | 30 | 6  | 3 NOT NAMED | 28.4 | 79.7 | 50 | 0 |
| 1937 | 8 | 30 | 12 | 3 NOT NAMED | 28.8 | 80.5 | 50 | 0 |
| 1937 | 8 | 30 | 18 | 3 NOT NAMED | 29.2 | 81.7 | 45 | 0 |
| 1937 | 8 | 31 | 0  | 3 NOT NAMED | 29.6 | 82.9 | 35 | 0 |
| 1937 | 8 | 31 | 6  | 3 NOT NAMED | 30.1 | 84.1 | 30 | 0 |
| 1937 | 8 | 31 | 12 | 3 NOT NAMED | 30.5 | 85.2 | 30 | 0 |
| 1937 | 8 | 31 | 18 | 3 NOT NAMED | 31.0 | 86.1 | 25 | 0 |
| 1937 | 9 | 1  | 0  | 3 NOT NAMED | 31.4 | 86.9 | 25 | 0 |
| 1937 | 9 | 1  | 6  | 3 NOT NAMED | 32.0 | 87.9 | 25 | 0 |
| 1937 | 9 | 1  | 12 | 3 NOT NAMED | 32.7 | 89.0 | 25 | 0 |
| 1937 | 9 | 1  | 18 | 3 NOT NAMED | 33.5 | 90.3 | 25 | 0 |
| 1937 | 9 | 2  | 0  | 3 NOT NAMED | 34.3 | 91.3 | 25 | 0 |
| 1937 | 9 | 2  | 6  | 3 NOT NAMED | 34.8 | 91.9 | 25 | 0 |
| 1937 | 9 | 2  | 12 | 3 NOT NAMED | 35.3 | 92.5 | 25 | 0 |
| 1937 | 9 | 2  | 18 | 3 NOT NAMED | 35.9 | 93.2 | 25 | 0 |
| 1937 | 9 | 9  | 0  | 4 NOT NAMED | 17.4 | 54.5 | 60 | 0 |
| 1937 | 9 | 9  | 6  | 4 NOT NAMED | 19.0 | 54.6 | 65 | 0 |
| 1937 | 9 | 9  | 12 | 4 NOT NAMED | 19.4 | 54.7 | 70 | 0 |
| 1937 | 9 | 9  | 18 | 4 NOT NAMED | 19.8 | 55.0 | 70 | 0 |
| 1937 | 9 | 10 | 0  | 4 NOT NAMED | 20.2 | 55.2 | 70 | 0 |
| 1937 | 9 | 10 | 6  | 4 NOT NAMED | 20.6 | 55.5 | 75 | 0 |
| 1937 | 9 | 10 | 12 | 4 NOT NAMED | 21.0 | 55.7 | 75 | 0 |
| 1937 | 9 | 10 | 18 | 4 NOT NAMED | 21.6 | 56.0 | 75 | 0 |
| 1937 | 9 | 11 | 0  | 4 NOT NAMED | 22.3 | 56.5 | 80 | 0 |
| 1937 | 9 | 11 | 6  | 4 NOT NAMED | 23.0 | 57.0 | 80 | 0 |
| 1937 | 9 | 11 | 12 | 4 NOT NAMED | 23.8 | 57.5 | 80 | 0 |
| 1937 | 9 | 11 | 18 | 4 NOT NAMED | 24.8 | 58.0 | 80 | 0 |
| 1937 | 9 | 12 | 0  | 4 NOT NAMED | 25.9 | 58.6 | 80 | 0 |
| 1937 | 9 | 12 | 6  | 4 NOT NAMED | 26.7 | 59.0 | 85 | 0 |
| 1937 | 9 | 12 | 12 | 4 NOT NAMED | 27.7 | 59.5 | 85 | 0 |
| 1937 | 9 | 12 | 18 | 4 NOT NAMED | 29.5 | 60.6 | 85 | 0 |
| 1937 | 9 | 13 | 0  | 4 NOT NAMED | 31.5 | 62.0 | 80 | 0 |
| 1937 | 9 | 13 | 6  | 4 NOT NAMED | 33.2 | 63.1 | 75 | 0 |
| 1937 | 9 | 13 | 12 | 4 NOT NAMED | 35.0 | 64.0 | 75 | 0 |
| 1937 | 9 | 13 | 18 | 4 NOT NAMED | 37.4 | 64.7 | 70 | 0 |
| 1937 | 9 | 14 | 0  | 4 NOT NAMED | 40.1 | 65.2 | 60 | 0 |
| 1937 | 9 | 14 | 6  | 4 NOT NAMED | 42.8 | 65.4 | 55 | 0 |
| 1937 | 9 | 14 | 12 | 4 NOT NAMED | 45.7 | 65.4 | 35 | 0 |
| 1937 | 9 | 14 | 18 | 4 NOT NAMED | 48.1 | 65.2 | 25 | 0 |
| 1937 | 9 | 13 | 6  | 5 NOT NAMED | 16.3 | 56.0 | 40 | 0 |
| 1937 | 9 | 13 | 12 | 5 NOT NAMED | 17.0 | 57.0 | 40 | 0 |
| 1937 | 9 | 13 | 18 | 5 NOT NAMED | 17.3 | 57.3 | 45 | 0 |
| 1937 | 9 | 14 | 0  | 5 NOT NAMED | 17.6 | 57.5 | 50 | 0 |



|      |      |    |             |      |      |    |   |
|------|------|----|-------------|------|------|----|---|
| 1937 | 9 14 | 6  | 5 NOT NAMED | 17.9 | 57.8 | 55 | 0 |
| 1937 | 9 14 | 12 | 5 NOT NAMED | 18.4 | 58.0 | 65 | 0 |
| 1937 | 9 14 | 18 | 5 NOT NAMED | 19.1 | 58.3 | 70 | 0 |
| 1937 | 9 15 | 0  | 5 NOT NAMED | 19.8 | 58.3 | 75 | 0 |
| 1937 | 9 15 | 6  | 5 NOT NAMED | 20.4 | 58.2 | 80 | 0 |
| 1937 | 9 15 | 12 | 5 NOT NAMED | 21.0 | 57.8 | 85 | 0 |
| 1937 | 9 15 | 18 | 5 NOT NAMED | 21.4 | 56.7 | 85 | 0 |
| 1937 | 9 16 | 0  | 5 NOT NAMED | 21.8 | 55.6 | 90 | 0 |
| 1937 | 9 16 | 6  | 5 NOT NAMED | 22.0 | 54.8 | 90 | 0 |
| 1937 | 9 16 | 12 | 5 NOT NAMED | 22.3 | 54.0 | 95 | 0 |
| 1937 | 9 16 | 18 | 5 NOT NAMED | 23.6 | 52.7 | 95 | 0 |
| 1937 | 9 17 | 0  | 5 NOT NAMED | 25.2 | 52.2 | 95 | 0 |
| 1937 | 9 17 | 6  | 5 NOT NAMED | 26.4 | 52.1 | 95 | 0 |
| 1937 | 9 17 | 12 | 5 NOT NAMED | 27.7 | 52.0 | 95 | 0 |
| 1937 | 9 17 | 18 | 5 NOT NAMED | 29.2 | 51.9 | 95 | 0 |
| 1937 | 9 18 | 0  | 5 NOT NAMED | 31.2 | 51.5 | 95 | 0 |
| 1937 | 9 18 | 6  | 5 NOT NAMED | 33.5 | 51.1 | 90 | 0 |
| 1937 | 9 18 | 12 | 5 NOT NAMED | 36.0 | 50.3 | 90 | 0 |
| 1937 | 9 18 | 18 | 5 NOT NAMED | 38.7 | 49.1 | 85 | 0 |
| 1937 | 9 19 | 0  | 5 NOT NAMED | 41.1 | 47.9 | 80 | 0 |
| 1937 | 9 19 | 6  | 5 NOT NAMED | 43.2 | 46.8 | 75 | 0 |
| 1937 | 9 19 | 12 | 5 NOT NAMED | 45.2 | 45.8 | 70 | 0 |
| 1937 | 9 19 | 18 | 5 NOT NAMED | 46.7 | 45.0 | 65 | 0 |
| 1937 | 9 16 | 12 | 6 NOT NAMED | 21.0 | 92.8 | 35 | 0 |
| 1937 | 9 16 | 18 | 6 NOT NAMED | 22.4 | 92.9 | 35 | 0 |
| 1937 | 9 17 | 0  | 6 NOT NAMED | 23.4 | 92.8 | 35 | 0 |
| 1937 | 9 17 | 6  | 6 NOT NAMED | 24.1 | 92.6 | 40 | 0 |
| 1937 | 9 17 | 12 | 6 NOT NAMED | 24.7 | 92.3 | 40 | 0 |
| 1937 | 9 17 | 18 | 6 NOT NAMED | 25.1 | 92.1 | 40 | 0 |
| 1937 | 9 18 | 0  | 6 NOT NAMED | 25.5 | 91.9 | 40 | 0 |
| 1937 | 9 18 | 6  | 6 NOT NAMED | 26.1 | 91.5 | 40 | 0 |
| 1937 | 9 18 | 12 | 6 NOT NAMED | 26.6 | 91.1 | 40 | 0 |
| 1937 | 9 18 | 18 | 6 NOT NAMED | 27.0 | 90.7 | 40 | 0 |
| 1937 | 9 19 | 0  | 6 NOT NAMED | 27.4 | 90.4 | 40 | 0 |
| 1937 | 9 19 | 6  | 6 NOT NAMED | 27.8 | 90.1 | 40 | 0 |
| 1937 | 9 19 | 12 | 6 NOT NAMED | 28.1 | 89.9 | 40 | 0 |
| 1937 | 9 19 | 18 | 6 NOT NAMED | 28.6 | 89.3 | 40 | 0 |
| 1937 | 9 20 | 0  | 6 NOT NAMED | 29.1 | 88.3 | 40 | 0 |
| 1937 | 9 20 | 6  | 6 NOT NAMED | 29.4 | 86.8 | 40 | 0 |
| 1937 | 9 20 | 12 | 6 NOT NAMED | 29.5 | 85.5 | 40 | 0 |
| 1937 | 9 20 | 18 | 6 NOT NAMED | 29.5 | 84.9 | 40 | 0 |
| 1937 | 9 21 | 0  | 6 NOT NAMED | 29.6 | 84.3 | 35 | 0 |
| 1937 | 9 21 | 6  | 6 NOT NAMED | 30.0 | 83.4 | 30 | 0 |
| 1937 | 9 21 | 12 | 6 NOT NAMED | 30.3 | 82.6 | 20 | 0 |

|      |         |             |      |      |    |   |
|------|---------|-------------|------|------|----|---|
| 1937 | 9 21 18 | 6 NOT NAMED | 29.7 | 81.8 | 15 | 0 |
| 1937 | 9 20 6  | 7 NOT NAMED | 15.2 | 41.4 | 60 | 0 |
| 1937 | 9 20 12 | 7 NOT NAMED | 15.3 | 43.9 | 60 | 0 |
| 1937 | 9 20 18 | 7 NOT NAMED | 15.9 | 45.2 | 65 | 0 |
| 1937 | 9 21 0  | 7 NOT NAMED | 16.5 | 46.3 | 70 | 0 |
| 1937 | 9 21 6  | 7 NOT NAMED | 17.2 | 47.3 | 70 | 0 |
| 1937 | 9 21 12 | 7 NOT NAMED | 17.9 | 48.2 | 70 | 0 |
| 1937 | 9 21 18 | 7 NOT NAMED | 18.7 | 49.0 | 75 | 0 |
| 1937 | 9 22 0  | 7 NOT NAMED | 19.6 | 49.8 | 75 | 0 |
| 1937 | 9 22 6  | 7 NOT NAMED | 20.8 | 50.9 | 80 | 0 |
| 1937 | 9 22 12 | 7 NOT NAMED | 22.0 | 52.0 | 80 | 0 |
| 1937 | 9 22 18 | 7 NOT NAMED | 23.0 | 52.8 | 80 | 0 |
| 1937 | 9 23 0  | 7 NOT NAMED | 24.0 | 53.3 | 80 | 0 |
| 1937 | 9 23 6  | 7 NOT NAMED | 24.7 | 53.6 | 85 | 0 |
| 1937 | 9 23 12 | 7 NOT NAMED | 25.5 | 53.9 | 85 | 0 |
| 1937 | 9 23 18 | 7 NOT NAMED | 26.6 | 54.2 | 85 | 0 |
| 1937 | 9 24 0  | 7 NOT NAMED | 27.8 | 54.6 | 85 | 0 |
| 1937 | 9 24 6  | 7 NOT NAMED | 28.8 | 55.0 | 85 | 0 |
| 1937 | 9 24 12 | 7 NOT NAMED | 30.0 | 55.5 | 85 | 0 |
| 1937 | 9 24 18 | 7 NOT NAMED | 31.5 | 56.3 | 85 | 0 |
| 1937 | 9 25 0  | 7 NOT NAMED | 33.2 | 57.5 | 85 | 0 |
| 1937 | 9 25 6  | 7 NOT NAMED | 34.7 | 58.7 | 85 | 0 |
| 1937 | 9 25 12 | 7 NOT NAMED | 36.3 | 60.0 | 85 | 0 |
| 1937 | 9 25 18 | 7 NOT NAMED | 38.5 | 61.2 | 85 | 0 |
| 1937 | 9 26 0  | 7 NOT NAMED | 40.8 | 62.4 | 80 | 0 |
| 1937 | 9 26 6  | 7 NOT NAMED | 42.3 | 63.0 | 80 | 0 |
| 1937 | 9 26 12 | 7 NOT NAMED | 43.8 | 63.1 | 75 | 0 |
| 1937 | 9 26 18 | 7 NOT NAMED | 46.3 | 62.3 | 70 | 0 |
| 1937 | 9 27 0  | 7 NOT NAMED | 48.8 | 58.7 | 65 | 0 |
| 1937 | 9 27 6  | 7 NOT NAMED | 50.5 | 56.5 | 60 | 0 |
| 1937 | 9 27 12 | 7 NOT NAMED | 52.2 | 54.2 | 50 | 0 |
| 1937 | 9 27 18 | 7 NOT NAMED | 54.4 | 52.0 | 40 | 0 |
| 1937 | 9 28 0  | 7 NOT NAMED | 56.8 | 49.7 | 35 | 0 |
| 1937 | 9 28 6  | 7 NOT NAMED | 59.4 | 47.3 | 35 | 0 |
| 1937 | 9 28 12 | 7 NOT NAMED | 62.0 | 45.0 | 35 | 0 |
| 1937 | 9 26 6  | 8 NOT NAMED | 23.2 | 79.4 | 35 | 0 |
| 1937 | 9 26 12 | 8 NOT NAMED | 23.7 | 79.2 | 35 | 0 |
| 1937 | 9 26 18 | 8 NOT NAMED | 24.3 | 79.0 | 35 | 0 |
| 1937 | 9 27 0  | 8 NOT NAMED | 25.5 | 78.7 | 35 | 0 |
| 1937 | 9 27 6  | 8 NOT NAMED | 27.2 | 77.8 | 35 | 0 |
| 1937 | 9 27 12 | 8 NOT NAMED | 29.0 | 76.9 | 35 | 0 |
| 1937 | 9 27 18 | 8 NOT NAMED | 30.4 | 76.0 | 35 | 0 |
| 1937 | 9 28 0  | 8 NOT NAMED | 31.8 | 75.2 | 40 | 0 |
| 1937 | 9 28 6  | 8 NOT NAMED | 34.1 | 73.6 | 40 | 0 |

|      |    |    |    |             |      |      |    |   |
|------|----|----|----|-------------|------|------|----|---|
| 1937 | 9  | 28 | 12 | 8 NOT NAMED | 36.4 | 71.9 | 40 | 0 |
| 1937 | 9  | 28 | 18 | 8 NOT NAMED | 37.7 | 70.5 | 40 | 0 |
| 1937 | 9  | 29 | 0  | 8 NOT NAMED | 39.0 | 69.0 | 40 | 0 |
| 1937 | 9  | 29 | 6  | 8 NOT NAMED | 40.5 | 67.2 | 35 | 0 |
| 1937 | 9  | 29 | 12 | 8 NOT NAMED | 42.0 | 65.0 | 35 | 0 |
| 1937 | 9  | 29 | 18 | 8 NOT NAMED | 43.5 | 62.7 | 35 | 0 |
| 1937 | 9  | 30 | 0  | 8 NOT NAMED | 45.0 | 59.9 | 35 | 0 |
| 1937 | 9  | 30 | 6  | 8 NOT NAMED | 46.5 | 57.0 | 35 | 0 |
| 1937 | 9  | 30 | 12 | 8 NOT NAMED | 48.0 | 53.0 | 35 | 0 |
| 1937 | 9  | 30 | 18 | 8 NOT NAMED | 48.8 | 49.9 | 35 | 0 |
| 1937 | 10 | 1  | 0  | 8 NOT NAMED | 49.5 | 47.0 | 35 | 0 |
| 1937 | 10 | 1  | 6  | 8 NOT NAMED | 50.2 | 44.9 | 35 | 0 |
| 1937 | 9  | 29 | 6  | 9 NOT NAMED | 17.3 | 85.5 | 35 | 0 |
| 1937 | 9  | 29 | 12 | 9 NOT NAMED | 18.8 | 85.5 | 35 | 0 |
| 1937 | 9  | 29 | 18 | 9 NOT NAMED | 19.3 | 85.5 | 35 | 0 |
| 1937 | 9  | 30 | 0  | 9 NOT NAMED | 19.8 | 85.5 | 35 | 0 |
| 1937 | 9  | 30 | 6  | 9 NOT NAMED | 20.3 | 85.5 | 35 | 0 |
| 1937 | 9  | 30 | 12 | 9 NOT NAMED | 20.8 | 85.5 | 35 | 0 |
| 1937 | 9  | 30 | 18 | 9 NOT NAMED | 21.3 | 85.5 | 35 | 0 |
| 1937 | 10 | 1  | 0  | 9 NOT NAMED | 21.8 | 85.6 | 35 | 0 |
| 1937 | 10 | 1  | 6  | 9 NOT NAMED | 22.4 | 85.7 | 35 | 0 |
| 1937 | 10 | 1  | 12 | 9 NOT NAMED | 23.1 | 86.0 | 35 | 0 |
| 1937 | 10 | 1  | 18 | 9 NOT NAMED | 23.8 | 86.9 | 35 | 0 |
| 1937 | 10 | 2  | 0  | 9 NOT NAMED | 24.5 | 88.0 | 35 | 0 |
| 1937 | 10 | 2  | 6  | 9 NOT NAMED | 25.1 | 89.1 | 35 | 0 |
| 1937 | 10 | 2  | 12 | 9 NOT NAMED | 25.6 | 89.7 | 35 | 0 |
| 1937 | 10 | 2  | 18 | 9 NOT NAMED | 26.8 | 90.9 | 35 | 0 |
| 1937 | 10 | 3  | 0  | 9 NOT NAMED | 28.1 | 91.9 | 35 | 0 |
| 1937 | 10 | 3  | 6  | 9 NOT NAMED | 28.6 | 92.0 | 35 | 0 |
| 1937 | 10 | 3  | 12 | 9 NOT NAMED | 29.0 | 92.0 | 35 | 0 |
| 1937 | 10 | 3  | 18 | 9 NOT NAMED | 29.9 | 91.9 | 35 | 0 |
| 1937 | 10 | 4  | 0  | 9 NOT NAMED | 31.1 | 91.6 | 30 | 0 |
| 1937 | 10 | 4  | 6  | 9 NOT NAMED | 32.2 | 91.0 | 25 | 0 |
| 1938 | 8  | 8  | 6  | 1 NOT NAMED | 17.4 | 62.3 | 60 | 0 |
| 1938 | 8  | 8  | 12 | 1 NOT NAMED | 18.0 | 63.3 | 60 | 0 |
| 1938 | 8  | 8  | 18 | 1 NOT NAMED | 18.4 | 64.8 | 55 | 0 |
| 1938 | 8  | 9  | 0  | 1 NOT NAMED | 18.5 | 66.6 | 50 | 0 |
| 1938 | 8  | 9  | 6  | 1 NOT NAMED | 18.7 | 68.1 | 35 | 0 |
| 1938 | 8  | 9  | 12 | 1 NOT NAMED | 19.6 | 71.7 | 30 | 0 |
| 1938 | 8  | 10 | 0  | 2 NOT NAMED | 11.2 | 58.6 | 35 | 0 |
| 1938 | 8  | 10 | 6  | 2 NOT NAMED | 11.6 | 60.5 | 40 | 0 |
| 1938 | 8  | 10 | 12 | 2 NOT NAMED | 12.2 | 62.8 | 45 | 0 |
| 1938 | 8  | 10 | 18 | 2 NOT NAMED | 13.1 | 64.7 | 45 | 0 |
| 1938 | 8  | 11 | 0  | 2 NOT NAMED | 13.9 | 66.9 | 50 | 0 |

|      |      |    |             |      |       |    |     |
|------|------|----|-------------|------|-------|----|-----|
| 1938 | 8 11 | 6  | 2 NOT NAMED | 14.6 | 69.4  | 55 | 0   |
| 1938 | 8 11 | 12 | 2 NOT NAMED | 15.3 | 72.0  | 60 | 0   |
| 1938 | 8 11 | 18 | 2 NOT NAMED | 16.0 | 74.4  | 65 | 0   |
| 1938 | 8 12 | 0  | 2 NOT NAMED | 16.8 | 76.8  | 70 | 0   |
| 1938 | 8 12 | 6  | 2 NOT NAMED | 17.6 | 79.1  | 75 | 0   |
| 1938 | 8 12 | 12 | 2 NOT NAMED | 18.4 | 81.3  | 80 | 0   |
| 1938 | 8 12 | 18 | 2 NOT NAMED | 19.2 | 83.4  | 80 | 0   |
| 1938 | 8 13 | 0  | 2 NOT NAMED | 20.0 | 85.0  | 85 | 0   |
| 1938 | 8 13 | 6  | 2 NOT NAMED | 20.9 | 86.3  | 85 | 0   |
| 1938 | 8 13 | 12 | 2 NOT NAMED | 21.9 | 87.5  | 85 | 0   |
| 1938 | 8 13 | 18 | 2 NOT NAMED | 23.0 | 88.8  | 85 | 0   |
| 1938 | 8 14 | 0  | 2 NOT NAMED | 24.1 | 90.0  | 85 | 0   |
| 1938 | 8 14 | 6  | 2 NOT NAMED | 25.2 | 91.1  | 85 | 0   |
| 1938 | 8 14 | 12 | 2 NOT NAMED | 26.3 | 91.9  | 80 | 0   |
| 1938 | 8 14 | 18 | 2 NOT NAMED | 27.4 | 92.5  | 75 | 0   |
| 1938 | 8 15 | 0  | 2 NOT NAMED | 29.0 | 92.9  | 65 | 0   |
| 1938 | 8 15 | 6  | 2 NOT NAMED | 30.3 | 93.6  | 35 | 0   |
| 1938 | 8 15 | 12 | 2 NOT NAMED | 31.5 | 94.9  | 20 | 0   |
| 1938 | 8 15 | 18 | 2 NOT NAMED | 33.0 | 96.0  | 20 | 0   |
| 1938 | 8 23 | 6  | 3 NOT NAMED | 14.1 | 72.3  | 60 | 0   |
| 1938 | 8 23 | 12 | 3 NOT NAMED | 15.0 | 75.0  | 60 | 0   |
| 1938 | 8 23 | 18 | 3 NOT NAMED | 15.6 | 76.3  | 65 | 0   |
| 1938 | 8 24 | 0  | 3 NOT NAMED | 16.2 | 77.7  | 70 | 0   |
| 1938 | 8 24 | 6  | 3 NOT NAMED | 16.7 | 79.2  | 75 | 0   |
| 1938 | 8 24 | 12 | 3 NOT NAMED | 17.2 | 80.6  | 80 | 0   |
| 1938 | 8 24 | 18 | 3 NOT NAMED | 17.6 | 81.7  | 85 | 0   |
| 1938 | 8 25 | 0  | 3 NOT NAMED | 18.0 | 82.7  | 85 | 0   |
| 1938 | 8 25 | 6  | 3 NOT NAMED | 18.4 | 83.8  | 85 | 0   |
| 1938 | 8 25 | 12 | 3 NOT NAMED | 18.9 | 84.8  | 85 | 0   |
| 1938 | 8 25 | 18 | 3 NOT NAMED | 19.6 | 86.1  | 85 | 0   |
| 1938 | 8 26 | 0  | 3 NOT NAMED | 20.3 | 87.6  | 85 | 0   |
| 1938 | 8 26 | 6  | 3 NOT NAMED | 20.9 | 88.9  | 80 | 0   |
| 1938 | 8 26 | 12 | 3 NOT NAMED | 21.4 | 90.2  | 80 | 979 |
| 1938 | 8 26 | 18 | 3 NOT NAMED | 21.8 | 91.2  | 80 | 0   |
| 1938 | 8 27 | 0  | 3 NOT NAMED | 22.1 | 92.2  | 75 | 0   |
| 1938 | 8 27 | 6  | 3 NOT NAMED | 22.5 | 93.3  | 75 | 0   |
| 1938 | 8 27 | 12 | 3 NOT NAMED | 22.8 | 94.4  | 75 | 0   |
| 1938 | 8 27 | 18 | 3 NOT NAMED | 23.0 | 95.2  | 75 | 0   |
| 1938 | 8 28 | 0  | 3 NOT NAMED | 23.1 | 96.0  | 70 | 0   |
| 1938 | 8 28 | 6  | 3 NOT NAMED | 23.1 | 97.1  | 60 | 0   |
| 1938 | 8 28 | 12 | 3 NOT NAMED | 23.0 | 98.7  | 55 | 0   |
| 1938 | 8 28 | 18 | 3 NOT NAMED | 22.6 | 100.3 | 35 | 0   |
| 1938 | 9 10 | 6  | 4 NOT NAMED | 14.2 | 21.5  | 35 | 0   |
| 1938 | 9 10 | 12 | 4 NOT NAMED | 14.4 | 23.8  | 35 | 0   |

|      |         |             |      |      |     |     |
|------|---------|-------------|------|------|-----|-----|
| 1938 | 9 10 18 | 4 NOT NAMED | 14.6 | 25.0 | 35  | 0   |
| 1938 | 9 11 0  | 4 NOT NAMED | 14.8 | 26.2 | 35  | 0   |
| 1938 | 9 11 6  | 4 NOT NAMED | 14.9 | 27.4 | 35  | 0   |
| 1938 | 9 11 12 | 4 NOT NAMED | 15.0 | 28.5 | 35  | 0   |
| 1938 | 9 11 18 | 4 NOT NAMED | 15.2 | 29.7 | 35  | 0   |
| 1938 | 9 12 0  | 4 NOT NAMED | 15.3 | 31.0 | 40  | 0   |
| 1938 | 9 12 6  | 4 NOT NAMED | 15.4 | 32.4 | 40  | 0   |
| 1938 | 9 12 12 | 4 NOT NAMED | 15.5 | 33.7 | 40  | 0   |
| 1938 | 9 12 18 | 4 NOT NAMED | 15.6 | 34.8 | 40  | 0   |
| 1938 | 9 13 0  | 4 NOT NAMED | 15.7 | 35.8 | 40  | 0   |
| 1938 | 9 13 6  | 4 NOT NAMED | 15.8 | 37.1 | 45  | 0   |
| 1938 | 9 13 12 | 4 NOT NAMED | 16.0 | 38.3 | 45  | 0   |
| 1938 | 9 13 18 | 4 NOT NAMED | 16.1 | 39.4 | 50  | 0   |
| 1938 | 9 14 0  | 4 NOT NAMED | 16.2 | 40.6 | 50  | 0   |
| 1938 | 9 14 6  | 4 NOT NAMED | 16.4 | 41.9 | 55  | 0   |
| 1938 | 9 14 12 | 4 NOT NAMED | 16.7 | 43.2 | 55  | 0   |
| 1938 | 9 14 18 | 4 NOT NAMED | 16.9 | 44.5 | 60  | 0   |
| 1938 | 9 15 0  | 4 NOT NAMED | 17.2 | 45.7 | 65  | 0   |
| 1938 | 9 15 6  | 4 NOT NAMED | 17.4 | 46.8 | 70  | 0   |
| 1938 | 9 15 12 | 4 NOT NAMED | 17.6 | 47.8 | 75  | 0   |
| 1938 | 9 15 18 | 4 NOT NAMED | 17.9 | 49.0 | 80  | 0   |
| 1938 | 9 16 0  | 4 NOT NAMED | 18.3 | 50.2 | 80  | 0   |
| 1938 | 9 16 6  | 4 NOT NAMED | 18.6 | 51.6 | 85  | 0   |
| 1938 | 9 16 12 | 4 NOT NAMED | 18.9 | 53.0 | 85  | 0   |
| 1938 | 9 16 18 | 4 NOT NAMED | 19.2 | 54.0 | 90  | 0   |
| 1938 | 9 17 0  | 4 NOT NAMED | 19.4 | 55.0 | 95  | 0   |
| 1938 | 9 17 6  | 4 NOT NAMED | 19.7 | 56.3 | 100 | 0   |
| 1938 | 9 17 12 | 4 NOT NAMED | 20.0 | 57.5 | 105 | 0   |
| 1938 | 9 17 18 | 4 NOT NAMED | 20.2 | 58.6 | 115 | 0   |
| 1938 | 9 18 0  | 4 NOT NAMED | 20.4 | 59.6 | 120 | 0   |
| 1938 | 9 18 6  | 4 NOT NAMED | 20.7 | 60.7 | 125 | 0   |
| 1938 | 9 18 12 | 4 NOT NAMED | 21.0 | 62.0 | 125 | 0   |
| 1938 | 9 18 18 | 4 NOT NAMED | 21.3 | 63.6 | 130 | 0   |
| 1938 | 9 19 0  | 4 NOT NAMED | 21.7 | 65.6 | 130 | 0   |
| 1938 | 9 19 6  | 4 NOT NAMED | 22.3 | 67.8 | 135 | 0   |
| 1938 | 9 19 12 | 4 NOT NAMED | 23.2 | 70.0 | 135 | 0   |
| 1938 | 9 19 18 | 4 NOT NAMED | 24.1 | 71.6 | 140 | 0   |
| 1938 | 9 20 0  | 4 NOT NAMED | 25.0 | 72.7 | 140 | 0   |
| 1938 | 9 20 6  | 4 NOT NAMED | 25.9 | 73.6 | 140 | 0   |
| 1938 | 9 20 12 | 4 NOT NAMED | 26.7 | 74.3 | 135 | 0   |
| 1938 | 9 20 18 | 4 NOT NAMED | 28.0 | 74.8 | 130 | 0   |
| 1938 | 9 21 0  | 4 NOT NAMED | 29.8 | 74.9 | 120 | 0   |
| 1938 | 9 21 6  | 4 NOT NAMED | 32.2 | 74.4 | 110 | 0   |
| 1938 | 9 21 12 | 4 NOT NAMED | 35.2 | 73.1 | 100 | 938 |

|      |    |    |    |             |      |      |    |      |
|------|----|----|----|-------------|------|------|----|------|
| 1938 | 9  | 21 | 18 | 4 NOT NAMED | 39.0 | 73.0 | 85 | 940  |
| 1938 | 9  | 22 | 0  | 4 NOT NAMED | 43.4 | 73.1 | 70 | 967  |
| 1938 | 9  | 22 | 6  | 4 NOT NAMED | 45.3 | 73.5 | 45 | 988  |
| 1938 | 9  | 22 | 12 | 4 NOT NAMED | 47.3 | 77.0 | 35 | 987  |
| 1938 | 9  | 22 | 18 | 4 NOT NAMED | 45.4 | 79.1 | 35 | 0    |
| 1938 | 10 | 11 | 0  | 5 NOT NAMED | 16.2 | 87.7 | 35 | 0    |
| 1938 | 10 | 11 | 6  | 5 NOT NAMED | 17.3 | 88.1 | 40 | 0    |
| 1938 | 10 | 11 | 12 | 5 NOT NAMED | 18.4 | 88.5 | 35 | 0    |
| 1938 | 10 | 11 | 18 | 5 NOT NAMED | 19.5 | 89.0 | 35 | 0    |
| 1938 | 10 | 12 | 0  | 5 NOT NAMED | 20.7 | 89.6 | 35 | 0    |
| 1938 | 10 | 12 | 6  | 5 NOT NAMED | 21.5 | 90.0 | 35 | 0    |
| 1938 | 10 | 12 | 12 | 5 NOT NAMED | 22.2 | 90.2 | 35 | 0    |
| 1938 | 10 | 12 | 18 | 5 NOT NAMED | 23.6 | 90.5 | 35 | 0    |
| 1938 | 10 | 13 | 0  | 5 NOT NAMED | 24.8 | 90.1 | 35 | 0    |
| 1938 | 10 | 13 | 6  | 5 NOT NAMED | 25.2 | 89.7 | 40 | 0    |
| 1938 | 10 | 13 | 12 | 5 NOT NAMED | 25.3 | 89.0 | 40 | 0    |
| 1938 | 10 | 13 | 18 | 5 NOT NAMED | 25.3 | 88.1 | 45 | 0    |
| 1938 | 10 | 14 | 0  | 5 NOT NAMED | 25.3 | 87.2 | 45 | 0    |
| 1938 | 10 | 14 | 6  | 5 NOT NAMED | 25.1 | 86.1 | 50 | 0    |
| 1938 | 10 | 14 | 12 | 5 NOT NAMED | 25.0 | 85.1 | 50 | 0    |
| 1938 | 10 | 14 | 18 | 5 NOT NAMED | 25.3 | 84.7 | 50 | 0    |
| 1938 | 10 | 15 | 0  | 5 NOT NAMED | 25.6 | 84.6 | 50 | 996  |
| 1938 | 10 | 15 | 6  | 5 NOT NAMED | 25.9 | 84.7 | 50 | 0    |
| 1938 | 10 | 15 | 12 | 5 NOT NAMED | 26.2 | 85.0 | 45 | 0    |
| 1938 | 10 | 15 | 18 | 5 NOT NAMED | 26.3 | 85.3 | 45 | 0    |
| 1938 | 10 | 16 | 0  | 5 NOT NAMED | 26.5 | 86.0 | 40 | 0    |
| 1938 | 10 | 16 | 6  | 5 NOT NAMED | 26.9 | 87.8 | 40 | 0    |
| 1938 | 10 | 16 | 12 | 5 NOT NAMED | 27.3 | 89.7 | 40 | 0    |
| 1938 | 10 | 16 | 18 | 5 NOT NAMED | 27.6 | 90.9 | 35 | 0    |
| 1938 | 10 | 17 | 0  | 5 NOT NAMED | 27.9 | 92.1 | 35 | 0    |
| 1938 | 10 | 17 | 6  | 5 NOT NAMED | 28.4 | 93.6 | 35 | 0    |
| 1938 | 10 | 17 | 12 | 5 NOT NAMED | 28.8 | 95.0 | 35 | 1006 |
| 1938 | 10 | 17 | 18 | 5 NOT NAMED | 29.3 | 96.9 | 30 | 0    |
| 1938 | 10 | 17 | 12 | 6 NOT NAMED | 32.7 | 63.4 | 35 | 0    |
| 1938 | 10 | 17 | 18 | 6 NOT NAMED | 31.6 | 65.1 | 35 | 0    |
| 1938 | 10 | 18 | 0  | 6 NOT NAMED | 30.6 | 66.6 | 35 | 0    |
| 1938 | 10 | 18 | 6  | 6 NOT NAMED | 29.7 | 67.9 | 35 | 0    |
| 1938 | 10 | 18 | 12 | 6 NOT NAMED | 28.9 | 69.1 | 35 | 0    |
| 1938 | 10 | 18 | 18 | 6 NOT NAMED | 28.3 | 70.0 | 35 | 0    |
| 1938 | 10 | 19 | 0  | 6 NOT NAMED | 27.8 | 71.0 | 40 | 0    |
| 1938 | 10 | 19 | 6  | 6 NOT NAMED | 27.2 | 72.2 | 40 | 0    |
| 1938 | 10 | 19 | 12 | 6 NOT NAMED | 26.2 | 74.9 | 40 | 0    |
| 1938 | 10 | 19 | 18 | 6 NOT NAMED | 26.0 | 76.7 | 40 | 0    |
| 1938 | 10 | 20 | 0  | 6 NOT NAMED | 26.3 | 77.9 | 40 | 0    |

|            |         |             |      |      |    |      |
|------------|---------|-------------|------|------|----|------|
| 1938 10 20 | 6       | 6 NOT NAMED | 27.4 | 78.8 | 35 | 0    |
| 1938 10 20 | 12      | 6 NOT NAMED | 28.3 | 78.7 | 35 | 0    |
| 1938 10 20 | 18      | 6 NOT NAMED | 29.9 | 78.1 | 30 | 0    |
| 1938 10 23 | 6       | 7 NOT NAMED | 23.8 | 93.9 | 35 | 0    |
| 1938 10 23 | 12      | 7 NOT NAMED | 24.8 | 92.4 | 35 | 0    |
| 1938 10 23 | 18      | 7 NOT NAMED | 25.8 | 90.4 | 35 | 0    |
| 1938 10 24 | 0       | 7 NOT NAMED | 27.4 | 87.6 | 40 | 0    |
| 1938 10 24 | 6       | 7 NOT NAMED | 29.6 | 83.7 | 40 | 0    |
| 1938 10 24 | 12      | 7 NOT NAMED | 32.2 | 79.8 | 40 | 0    |
| 1938 10 24 | 18      | 7 NOT NAMED | 35.1 | 76.4 | 35 | 0    |
| 1938 10 25 | 0       | 7 NOT NAMED | 38.5 | 73.1 | 35 | 0    |
| 1938 10 25 | 6       | 7 NOT NAMED | 42.4 | 69.5 | 30 | 0    |
| 1938 11    | 6 18    | 8 NOT NAMED | 17.2 | 70.4 | 40 | 0    |
| 1938 11    | 7 0     | 8 NOT NAMED | 18.3 | 71.3 | 35 | 0    |
| 1938 11    | 7 6     | 8 NOT NAMED | 19.5 | 72.5 | 40 | 0    |
| 1938 11    | 7 12    | 8 NOT NAMED | 20.8 | 73.7 | 50 | 0    |
| 1938 11    | 7 18    | 8 NOT NAMED | 21.9 | 74.7 | 60 | 0    |
| 1938 11    | 8 0     | 8 NOT NAMED | 22.8 | 75.5 | 60 | 0    |
| 1938 11    | 8 6     | 8 NOT NAMED | 23.7 | 76.6 | 60 | 0    |
| 1938 11    | 8 12    | 8 NOT NAMED | 23.9 | 77.6 | 55 | 0    |
| 1938 11    | 8 18    | 8 NOT NAMED | 23.8 | 78.2 | 55 | 0    |
| 1938 11    | 9 0     | 8 NOT NAMED | 23.4 | 78.8 | 50 | 0    |
| 1938 11    | 9 6     | 8 NOT NAMED | 22.7 | 79.6 | 50 | 0    |
| 1938 11    | 9 12    | 8 NOT NAMED | 22.1 | 80.3 | 45 | 0    |
| 1938 11    | 9 18    | 8 NOT NAMED | 21.7 | 80.8 | 40 | 0    |
| 1938 11 10 | 0       | 8 NOT NAMED | 21.2 | 81.3 | 40 | 0    |
| 1938 11 10 | 6       | 8 NOT NAMED | 20.5 | 81.8 | 35 | 0    |
| 1938 11 10 | 12      | 8 NOT NAMED | 19.8 | 82.4 | 35 | 0    |
| 1938 11 10 | 18      | 8 NOT NAMED | 18.1 | 83.6 | 30 | 0    |
| 1939       | 6 12 6  | 1 NOT NAMED | 17.6 | 88.0 | 35 | 0    |
| 1939       | 6 12 12 | 1 NOT NAMED | 18.6 | 87.1 | 35 | 0    |
| 1939       | 6 12 18 | 1 NOT NAMED | 19.3 | 87.0 | 35 | 0    |
| 1939       | 6 13 0  | 1 NOT NAMED | 20.3 | 87.0 | 35 | 1003 |
| 1939       | 6 13 6  | 1 NOT NAMED | 21.7 | 87.0 | 35 | 0    |
| 1939       | 6 13 12 | 1 NOT NAMED | 23.1 | 87.0 | 35 | 0    |
| 1939       | 6 13 18 | 1 NOT NAMED | 24.2 | 87.0 | 40 | 0    |
| 1939       | 6 14 0  | 1 NOT NAMED | 25.2 | 87.0 | 40 | 0    |
| 1939       | 6 14 6  | 1 NOT NAMED | 26.3 | 87.0 | 40 | 0    |
| 1939       | 6 14 12 | 1 NOT NAMED | 27.5 | 87.0 | 45 | 0    |
| 1939       | 6 14 18 | 1 NOT NAMED | 28.4 | 87.1 | 45 | 0    |
| 1939       | 6 15 0  | 1 NOT NAMED | 28.8 | 87.4 | 45 | 0    |
| 1939       | 6 15 6  | 1 NOT NAMED | 28.4 | 89.0 | 45 | 0    |
| 1939       | 6 15 12 | 1 NOT NAMED | 28.1 | 88.1 | 40 | 0    |
| 1939       | 6 15 18 | 1 NOT NAMED | 28.5 | 87.7 | 40 | 0    |

|      |   |    |    |   |           |      |      |    |   |
|------|---|----|----|---|-----------|------|------|----|---|
| 1939 | 6 | 16 | 0  | 1 | NOT NAMED | 29.1 | 87.6 | 35 | 0 |
| 1939 | 6 | 16 | 6  | 1 | NOT NAMED | 29.8 | 87.8 | 35 | 0 |
| 1939 | 6 | 16 | 12 | 1 | NOT NAMED | 30.4 | 88.0 | 35 | 0 |
| 1939 | 6 | 16 | 18 | 1 | NOT NAMED | 31.5 | 88.7 | 30 | 0 |
| 1939 | 6 | 17 | 0  | 1 | NOT NAMED | 33.1 | 89.9 | 25 | 0 |
| 1939 | 8 | 7  | 18 | 2 | NOT NAMED | 19.3 | 63.9 | 35 | 0 |
| 1939 | 8 | 8  | 0  | 2 | NOT NAMED | 19.5 | 64.6 | 35 | 0 |
| 1939 | 8 | 8  | 6  | 2 | NOT NAMED | 19.9 | 65.3 | 35 | 0 |
| 1939 | 8 | 8  | 12 | 2 | NOT NAMED | 20.2 | 66.0 | 35 | 0 |
| 1939 | 8 | 8  | 18 | 2 | NOT NAMED | 20.7 | 66.9 | 35 | 0 |
| 1939 | 8 | 9  | 0  | 2 | NOT NAMED | 21.3 | 68.0 | 35 | 0 |
| 1939 | 8 | 9  | 6  | 2 | NOT NAMED | 21.7 | 68.8 | 35 | 0 |
| 1939 | 8 | 9  | 12 | 2 | NOT NAMED | 22.2 | 69.7 | 40 | 0 |
| 1939 | 8 | 9  | 18 | 2 | NOT NAMED | 22.8 | 70.8 | 40 | 0 |
| 1939 | 8 | 10 | 0  | 2 | NOT NAMED | 23.3 | 72.0 | 45 | 0 |
| 1939 | 8 | 10 | 6  | 2 | NOT NAMED | 23.8 | 73.2 | 45 | 0 |
| 1939 | 8 | 10 | 12 | 2 | NOT NAMED | 24.3 | 74.3 | 50 | 0 |
| 1939 | 8 | 10 | 18 | 2 | NOT NAMED | 24.7 | 75.2 | 55 | 0 |
| 1939 | 8 | 11 | 0  | 2 | NOT NAMED | 25.2 | 76.1 | 55 | 0 |
| 1939 | 8 | 11 | 6  | 2 | NOT NAMED | 25.9 | 77.5 | 60 | 0 |
| 1939 | 8 | 11 | 12 | 2 | NOT NAMED | 26.7 | 79.0 | 65 | 0 |
| 1939 | 8 | 11 | 18 | 2 | NOT NAMED | 27.2 | 80.0 | 70 | 0 |
| 1939 | 8 | 12 | 0  | 2 | NOT NAMED | 27.7 | 81.0 | 60 | 0 |
| 1939 | 8 | 12 | 6  | 2 | NOT NAMED | 28.3 | 82.2 | 60 | 0 |
| 1939 | 8 | 12 | 12 | 2 | NOT NAMED | 28.8 | 83.3 | 60 | 0 |
| 1939 | 8 | 12 | 18 | 2 | NOT NAMED | 29.3 | 84.1 | 65 | 0 |
| 1939 | 8 | 13 | 0  | 2 | NOT NAMED | 29.7 | 84.9 | 70 | 0 |
| 1939 | 8 | 13 | 6  | 2 | NOT NAMED | 30.1 | 85.7 | 60 | 0 |
| 1939 | 8 | 13 | 12 | 2 | NOT NAMED | 30.5 | 86.3 | 60 | 0 |
| 1939 | 8 | 13 | 18 | 2 | NOT NAMED | 30.7 | 86.7 | 50 | 0 |
| 1939 | 8 | 14 | 0  | 2 | NOT NAMED | 31.0 | 87.0 | 35 | 0 |
| 1939 | 8 | 14 | 6  | 2 | NOT NAMED | 31.3 | 87.3 | 30 | 0 |
| 1939 | 8 | 14 | 12 | 2 | NOT NAMED | 31.5 | 87.5 | 25 | 0 |
| 1939 | 8 | 14 | 18 | 2 | NOT NAMED | 31.8 | 87.6 | 25 | 0 |
| 1939 | 8 | 15 | 0  | 2 | NOT NAMED | 32.0 | 87.7 | 25 | 0 |
| 1939 | 8 | 15 | 6  | 2 | NOT NAMED | 32.3 | 87.8 | 25 | 0 |
| 1939 | 8 | 15 | 12 | 2 | NOT NAMED | 32.5 | 87.8 | 25 | 0 |
| 1939 | 8 | 15 | 18 | 2 | NOT NAMED | 32.8 | 87.7 | 25 | 0 |
| 1939 | 8 | 16 | 0  | 2 | NOT NAMED | 33.0 | 87.6 | 25 | 0 |
| 1939 | 8 | 16 | 6  | 2 | NOT NAMED | 33.1 | 87.4 | 20 | 0 |
| 1939 | 8 | 16 | 12 | 2 | NOT NAMED | 33.4 | 87.2 | 20 | 0 |
| 1939 | 8 | 16 | 18 | 2 | NOT NAMED | 33.6 | 86.9 | 20 | 0 |
| 1939 | 8 | 17 | 0  | 2 | NOT NAMED | 33.8 | 86.6 | 15 | 0 |
| 1939 | 8 | 17 | 6  | 2 | NOT NAMED | 33.9 | 86.3 | 15 | 0 |



|      |          |             |      |      |     |   |
|------|----------|-------------|------|------|-----|---|
| 1939 | 8 17 12  | 2 NOT NAMED | 34.1 | 85.9 | 20  | 0 |
| 1939 | 8 17 18  | 2 NOT NAMED | 34.2 | 85.7 | 20  | 0 |
| 1939 | 8 18 0   | 2 NOT NAMED | 34.4 | 85.3 | 20  | 0 |
| 1939 | 8 18 6   | 2 NOT NAMED | 34.7 | 84.6 | 25  | 0 |
| 1939 | 8 18 12  | 2 NOT NAMED | 35.1 | 83.5 | 25  | 0 |
| 1939 | 8 18 18  | 2 NOT NAMED | 35.6 | 81.6 | 25  | 0 |
| 1939 | 8 19 0   | 2 NOT NAMED | 36.4 | 80.0 | 25  | 0 |
| 1939 | 8 19 6   | 2 NOT NAMED | 37.5 | 78.4 | 25  | 0 |
| 1939 | 8 19 12  | 2 NOT NAMED | 38.5 | 77.4 | 25  | 0 |
| 1939 | 8 19 18  | 2 NOT NAMED | 39.2 | 76.6 | 25  | 0 |
| 1939 | 8 20 0   | 2 NOT NAMED | 39.9 | 75.9 | 25  | 0 |
| 1939 | 8 20 6   | 2 NOT NAMED | 40.8 | 75.1 | 25  | 0 |
| 1939 | 8 20 12  | 2 NOT NAMED | 41.6 | 74.5 | 25  | 0 |
| 1939 | 8 20 18  | 2 NOT NAMED | 42.6 | 74.5 | 25  | 0 |
| 1939 | 9 23 6   | 3 NOT NAMED | 18.7 | 93.7 | 35  | 0 |
| 1939 | 9 23 12  | 3 NOT NAMED | 19.2 | 93.4 | 35  | 0 |
| 1939 | 9 23 18  | 3 NOT NAMED | 19.7 | 93.2 | 35  | 0 |
| 1939 | 9 24 0   | 3 NOT NAMED | 20.3 | 92.8 | 35  | 0 |
| 1939 | 9 24 6   | 3 NOT NAMED | 21.0 | 92.3 | 35  | 0 |
| 1939 | 9 24 12  | 3 NOT NAMED | 21.8 | 91.8 | 35  | 0 |
| 1939 | 9 24 18  | 3 NOT NAMED | 22.7 | 91.4 | 35  | 0 |
| 1939 | 9 25 0   | 3 NOT NAMED | 23.7 | 91.1 | 35  | 0 |
| 1939 | 9 25 6   | 3 NOT NAMED | 24.7 | 90.9 | 40  | 0 |
| 1939 | 9 25 12  | 3 NOT NAMED | 25.7 | 90.8 | 40  | 0 |
| 1939 | 9 25 18  | 3 NOT NAMED | 26.8 | 90.9 | 40  | 0 |
| 1939 | 9 26 0   | 3 NOT NAMED | 27.8 | 90.9 | 40  | 0 |
| 1939 | 9 26 6   | 3 NOT NAMED | 28.5 | 90.8 | 40  | 0 |
| 1939 | 9 26 12  | 3 NOT NAMED | 29.2 | 90.6 | 35  | 0 |
| 1939 | 9 26 18  | 3 NOT NAMED | 29.8 | 90.3 | 30  | 0 |
| 1939 | 10 12 18 | 4 NOT NAMED | 19.5 | 63.4 | 35  | 0 |
| 1939 | 10 13 0  | 4 NOT NAMED | 19.8 | 63.8 | 35  | 0 |
| 1939 | 10 13 6  | 4 NOT NAMED | 20.3 | 64.5 | 40  | 0 |
| 1939 | 10 13 12 | 4 NOT NAMED | 20.8 | 65.3 | 40  | 0 |
| 1939 | 10 13 18 | 4 NOT NAMED | 21.4 | 66.1 | 45  | 0 |
| 1939 | 10 14 0  | 4 NOT NAMED | 22.0 | 66.9 | 45  | 0 |
| 1939 | 10 14 6  | 4 NOT NAMED | 22.5 | 67.4 | 50  | 0 |
| 1939 | 10 14 12 | 4 NOT NAMED | 23.1 | 67.9 | 55  | 0 |
| 1939 | 10 14 18 | 4 NOT NAMED | 24.0 | 68.4 | 60  | 0 |
| 1939 | 10 15 0  | 4 NOT NAMED | 24.9 | 68.5 | 65  | 0 |
| 1939 | 10 15 6  | 4 NOT NAMED | 25.8 | 68.4 | 70  | 0 |
| 1939 | 10 15 12 | 4 NOT NAMED | 26.7 | 68.0 | 75  | 0 |
| 1939 | 10 15 18 | 4 NOT NAMED | 27.8 | 67.5 | 85  | 0 |
| 1939 | 10 16 0  | 4 NOT NAMED | 28.9 | 66.8 | 90  | 0 |
| 1939 | 10 16 6  | 4 NOT NAMED | 30.0 | 66.1 | 100 | 0 |

|               |   |           |      |      |     |   |
|---------------|---|-----------|------|------|-----|---|
| 1939 10 16 12 | 4 | NOT NAMED | 31.1 | 65.2 | 105 | 0 |
| 1939 10 16 18 | 4 | NOT NAMED | 32.5 | 64.2 | 115 | 0 |
| 1939 10 17 0  | 4 | NOT NAMED | 34.0 | 63.1 | 115 | 0 |
| 1939 10 17 6  | 4 | NOT NAMED | 35.2 | 62.1 | 110 | 0 |
| 1939 10 17 12 | 4 | NOT NAMED | 36.6 | 61.1 | 105 | 0 |
| 1939 10 17 18 | 4 | NOT NAMED | 39.9 | 58.7 | 95  | 0 |
| 1939 10 18 0  | 4 | NOT NAMED | 43.9 | 55.6 | 80  | 0 |
| 1939 10 18 6  | 4 | NOT NAMED | 47.0 | 53.6 | 65  | 0 |
| 1939 10 18 12 | 4 | NOT NAMED | 50.2 | 51.0 | 60  | 0 |
| 1939 10 29 6  | 5 | NOT NAMED | 15.8 | 82.0 | 35  | 0 |
| 1939 10 29 12 | 5 | NOT NAMED | 16.6 | 83.7 | 35  | 0 |
| 1939 10 29 18 | 5 | NOT NAMED | 17.1 | 84.5 | 35  | 0 |
| 1939 10 30 0  | 5 | NOT NAMED | 17.7 | 84.7 | 40  | 0 |
| 1939 10 30 6  | 5 | NOT NAMED | 18.4 | 84.6 | 40  | 0 |
| 1939 10 30 12 | 5 | NOT NAMED | 18.9 | 84.2 | 45  | 0 |
| 1939 10 30 18 | 5 | NOT NAMED | 19.0 | 83.9 | 45  | 0 |
| 1939 10 31 0  | 5 | NOT NAMED | 19.1 | 83.6 | 55  | 0 |
| 1939 10 31 6  | 5 | NOT NAMED | 19.2 | 83.2 | 55  | 0 |
| 1939 10 31 12 | 5 | NOT NAMED | 19.2 | 82.7 | 65  | 0 |
| 1939 10 31 18 | 5 | NOT NAMED | 19.2 | 81.8 | 75  | 0 |
| 1939 11 1 0   | 5 | NOT NAMED | 19.2 | 80.8 | 80  | 0 |
| 1939 11 1 6   | 5 | NOT NAMED | 19.2 | 80.1 | 70  | 0 |
| 1939 11 1 12  | 5 | NOT NAMED | 19.2 | 79.5 | 65  | 0 |
| 1939 11 1 18  | 5 | NOT NAMED | 19.2 | 79.1 | 60  | 0 |
| 1939 11 2 0   | 5 | NOT NAMED | 19.1 | 78.7 | 60  | 0 |
| 1939 11 2 6   | 5 | NOT NAMED | 19.1 | 78.2 | 55  | 0 |
| 1939 11 2 12  | 5 | NOT NAMED | 19.1 | 77.8 | 55  | 0 |
| 1939 11 2 18  | 5 | NOT NAMED | 19.1 | 77.5 | 50  | 0 |
| 1939 11 3 0   | 5 | NOT NAMED | 19.1 | 77.2 | 50  | 0 |
| 1939 11 3 6   | 5 | NOT NAMED | 19.3 | 76.7 | 50  | 0 |
| 1939 11 3 12  | 5 | NOT NAMED | 19.5 | 76.3 | 45  | 0 |
| 1939 11 3 18  | 5 | NOT NAMED | 19.8 | 76.0 | 45  | 0 |
| 1939 11 4 0   | 5 | NOT NAMED | 20.0 | 75.9 | 45  | 0 |
| 1939 11 4 6   | 5 | NOT NAMED | 20.4 | 75.7 | 40  | 0 |
| 1939 11 4 12  | 5 | NOT NAMED | 20.7 | 75.5 | 40  | 0 |
| 1939 11 4 18  | 5 | NOT NAMED | 21.1 | 75.2 | 45  | 0 |
| 1939 11 5 0   | 5 | NOT NAMED | 21.6 | 74.9 | 45  | 0 |
| 1939 11 5 6   | 5 | NOT NAMED | 22.1 | 74.6 | 50  | 0 |
| 1939 11 5 12  | 5 | NOT NAMED | 22.7 | 74.2 | 50  | 0 |
| 1939 11 5 18  | 5 | NOT NAMED | 23.9 | 73.2 | 50  | 0 |
| 1939 11 6 0   | 5 | NOT NAMED | 25.5 | 72.0 | 50  | 0 |
| 1939 11 6 6   | 5 | NOT NAMED | 27.1 | 71.0 | 50  | 0 |
| 1939 11 6 12  | 5 | NOT NAMED | 28.7 | 70.1 | 50  | 0 |
| 1939 11 6 18  | 5 | NOT NAMED | 33.0 | 67.4 | 50  | 0 |

|      |   |    |    |   |           |      |      |    |   |
|------|---|----|----|---|-----------|------|------|----|---|
| 1940 | 5 | 19 | 12 | 1 | NOT NAMED | 21.1 | 71.9 | 35 | 0 |
| 1940 | 5 | 19 | 18 | 1 | NOT NAMED | 21.9 | 71.9 | 35 | 0 |
| 1940 | 5 | 20 | 0  | 1 | NOT NAMED | 22.8 | 72.1 | 35 | 0 |
| 1940 | 5 | 20 | 6  | 1 | NOT NAMED | 23.9 | 72.1 | 35 | 0 |
| 1940 | 5 | 20 | 12 | 1 | NOT NAMED | 25.0 | 72.2 | 40 | 0 |
| 1940 | 5 | 20 | 18 | 1 | NOT NAMED | 26.0 | 72.3 | 40 | 0 |
| 1940 | 5 | 21 | 0  | 1 | NOT NAMED | 27.0 | 72.3 | 45 | 0 |
| 1940 | 5 | 21 | 6  | 1 | NOT NAMED | 28.0 | 72.3 | 45 | 0 |
| 1940 | 5 | 21 | 12 | 1 | NOT NAMED | 28.9 | 72.4 | 50 | 0 |
| 1940 | 5 | 21 | 18 | 1 | NOT NAMED | 29.8 | 72.5 | 50 | 0 |
| 1940 | 5 | 22 | 0  | 1 | NOT NAMED | 30.6 | 72.7 | 50 | 0 |
| 1940 | 5 | 22 | 6  | 1 | NOT NAMED | 32.6 | 72.9 | 45 | 0 |
| 1940 | 5 | 22 | 12 | 1 | NOT NAMED | 34.3 | 72.8 | 40 | 0 |
| 1940 | 5 | 22 | 18 | 1 | NOT NAMED | 34.7 | 72.3 | 40 | 0 |
| 1940 | 5 | 23 | 0  | 1 | NOT NAMED | 34.9 | 71.9 | 35 | 0 |
| 1940 | 5 | 23 | 6  | 1 | NOT NAMED | 35.1 | 71.4 | 35 | 0 |
| 1940 | 5 | 23 | 12 | 1 | NOT NAMED | 35.3 | 71.0 | 35 | 0 |
| 1940 | 5 | 23 | 18 | 1 | NOT NAMED | 35.4 | 70.7 | 35 | 0 |
| 1940 | 5 | 24 | 0  | 1 | NOT NAMED | 35.5 | 70.1 | 35 | 0 |
| 1940 | 5 | 24 | 6  | 1 | NOT NAMED | 35.6 | 69.9 | 35 | 0 |
| 1940 | 5 | 24 | 12 | 1 | NOT NAMED | 35.7 | 69.8 | 35 | 0 |
| 1940 | 5 | 24 | 18 | 1 | NOT NAMED | 36.2 | 69.2 | 35 | 0 |
| 1940 | 5 | 25 | 0  | 1 | NOT NAMED | 36.9 | 68.5 | 35 | 0 |
| 1940 | 5 | 25 | 6  | 1 | NOT NAMED | 37.4 | 67.9 | 35 | 0 |
| 1940 | 5 | 25 | 12 | 1 | NOT NAMED | 37.9 | 67.3 | 35 | 0 |
| 1940 | 5 | 25 | 18 | 1 | NOT NAMED | 38.5 | 66.7 | 35 | 0 |
| 1940 | 5 | 26 | 0  | 1 | NOT NAMED | 39.2 | 66.2 | 35 | 0 |
| 1940 | 5 | 26 | 6  | 1 | NOT NAMED | 39.7 | 65.7 | 35 | 0 |
| 1940 | 5 | 26 | 12 | 1 | NOT NAMED | 40.2 | 65.2 | 30 | 0 |
| 1940 | 5 | 26 | 18 | 1 | NOT NAMED | 41.1 | 64.3 | 30 | 0 |
| 1940 | 5 | 27 | 0  | 1 | NOT NAMED | 42.2 | 63.1 | 25 | 0 |
| 1940 | 5 | 27 | 6  | 1 | NOT NAMED | 43.5 | 61.5 | 20 | 0 |
| 1940 | 8 | 2  | 12 | 2 | NOT NAMED | 30.5 | 79.5 | 35 | 0 |
| 1940 | 8 | 2  | 18 | 2 | NOT NAMED | 30.1 | 80.1 | 40 | 0 |
| 1940 | 8 | 3  | 0  | 2 | NOT NAMED | 29.6 | 81.0 | 35 | 0 |
| 1940 | 8 | 3  | 6  | 2 | NOT NAMED | 28.9 | 82.2 | 35 | 0 |
| 1940 | 8 | 3  | 12 | 2 | NOT NAMED | 28.4 | 83.3 | 35 | 0 |
| 1940 | 8 | 3  | 18 | 2 | NOT NAMED | 28.1 | 84.2 | 35 | 0 |
| 1940 | 8 | 4  | 0  | 2 | NOT NAMED | 27.9 | 84.9 | 40 | 0 |
| 1940 | 8 | 4  | 6  | 2 | NOT NAMED | 27.8 | 85.5 | 40 | 0 |
| 1940 | 8 | 4  | 12 | 2 | NOT NAMED | 27.7 | 86.1 | 40 | 0 |
| 1940 | 8 | 4  | 18 | 2 | NOT NAMED | 27.7 | 86.8 | 45 | 0 |
| 1940 | 8 | 5  | 0  | 2 | NOT NAMED | 27.7 | 87.5 | 50 | 0 |
| 1940 | 8 | 5  | 6  | 2 | NOT NAMED | 27.7 | 88.1 | 50 | 0 |

|      |   |    |    |             |      |      |    |      |
|------|---|----|----|-------------|------|------|----|------|
| 1940 | 8 | 5  | 12 | 2 NOT NAMED | 27.8 | 88.7 | 55 | 0    |
| 1940 | 8 | 5  | 18 | 2 NOT NAMED | 27.9 | 89.4 | 60 | 0    |
| 1940 | 8 | 6  | 0  | 2 NOT NAMED | 28.0 | 90.0 | 65 | 0    |
| 1940 | 8 | 6  | 6  | 2 NOT NAMED | 28.1 | 90.5 | 65 | 0    |
| 1940 | 8 | 6  | 12 | 2 NOT NAMED | 28.2 | 90.8 | 70 | 0    |
| 1940 | 8 | 6  | 18 | 2 NOT NAMED | 28.5 | 91.5 | 70 | 0    |
| 1940 | 8 | 7  | 0  | 2 NOT NAMED | 28.8 | 92.0 | 70 | 0    |
| 1940 | 8 | 7  | 6  | 2 NOT NAMED | 29.0 | 92.6 | 70 | 0    |
| 1940 | 8 | 7  | 12 | 2 NOT NAMED | 29.3 | 93.0 | 70 | 0    |
| 1940 | 8 | 7  | 18 | 2 NOT NAMED | 29.6 | 93.4 | 70 | 0    |
| 1940 | 8 | 8  | 0  | 2 NOT NAMED | 29.9 | 93.7 | 70 | 972  |
| 1940 | 8 | 8  | 6  | 2 NOT NAMED | 30.1 | 93.8 | 65 | 0    |
| 1940 | 8 | 8  | 12 | 2 NOT NAMED | 30.3 | 94.0 | 60 | 0    |
| 1940 | 8 | 8  | 18 | 2 NOT NAMED | 30.7 | 94.4 | 55 | 0    |
| 1940 | 8 | 9  | 0  | 2 NOT NAMED | 31.3 | 94.8 | 50 | 0    |
| 1940 | 8 | 9  | 6  | 2 NOT NAMED | 31.9 | 94.9 | 40 | 0    |
| 1940 | 8 | 9  | 12 | 2 NOT NAMED | 32.5 | 95.0 | 35 | 0    |
| 1940 | 8 | 9  | 18 | 2 NOT NAMED | 33.1 | 95.0 | 30 | 0    |
| 1940 | 8 | 10 | 0  | 2 NOT NAMED | 33.7 | 95.0 | 25 | 0    |
| 1940 | 8 | 10 | 6  | 2 NOT NAMED | 34.3 | 94.9 | 20 | 0    |
| 1940 | 8 | 10 | 12 | 2 NOT NAMED | 34.9 | 94.7 | 20 | 0    |
| 1940 | 8 | 10 | 18 | 2 NOT NAMED | 35.7 | 94.2 | 20 | 0    |
| 1940 | 8 | 11 | 0  | 2 NOT NAMED | 36.6 | 93.5 | 15 | 0    |
| 1940 | 8 | 11 | 6  | 2 NOT NAMED | 37.7 | 92.5 | 15 | 0    |
| 1940 | 8 | 5  | 6  | 3 NOT NAMED | 18.2 | 62.2 | 35 | 0    |
| 1940 | 8 | 5  | 12 | 3 NOT NAMED | 18.6 | 63.5 | 40 | 0    |
| 1940 | 8 | 5  | 18 | 3 NOT NAMED | 18.9 | 64.8 | 40 | 1012 |
| 1940 | 8 | 6  | 0  | 3 NOT NAMED | 19.4 | 66.4 | 40 | 0    |
| 1940 | 8 | 6  | 6  | 3 NOT NAMED | 20.2 | 68.3 | 40 | 0    |
| 1940 | 8 | 6  | 12 | 3 NOT NAMED | 21.0 | 70.2 | 40 | 0    |
| 1940 | 8 | 6  | 18 | 3 NOT NAMED | 21.8 | 71.7 | 45 | 1003 |
| 1940 | 8 | 7  | 0  | 3 NOT NAMED | 22.5 | 72.8 | 45 | 0    |
| 1940 | 8 | 7  | 6  | 3 NOT NAMED | 23.0 | 73.4 | 50 | 0    |
| 1940 | 8 | 7  | 12 | 3 NOT NAMED | 23.5 | 73.8 | 50 | 0    |
| 1940 | 8 | 7  | 18 | 3 NOT NAMED | 24.4 | 74.0 | 55 | 0    |
| 1940 | 8 | 8  | 0  | 3 NOT NAMED | 25.4 | 74.1 | 55 | 0    |
| 1940 | 8 | 8  | 6  | 3 NOT NAMED | 26.3 | 74.1 | 65 | 0    |
| 1940 | 8 | 8  | 12 | 3 NOT NAMED | 27.0 | 74.1 | 65 | 0    |
| 1940 | 8 | 8  | 18 | 3 NOT NAMED | 27.4 | 74.1 | 70 | 0    |
| 1940 | 8 | 9  | 0  | 3 NOT NAMED | 27.8 | 74.2 | 70 | 0    |
| 1940 | 8 | 9  | 6  | 3 NOT NAMED | 28.2 | 74.3 | 75 | 0    |
| 1940 | 8 | 9  | 12 | 3 NOT NAMED | 28.6 | 74.6 | 75 | 0    |
| 1940 | 8 | 9  | 18 | 3 NOT NAMED | 28.8 | 75.0 | 80 | 0    |
| 1940 | 8 | 10 | 0  | 3 NOT NAMED | 29.0 | 75.6 | 80 | 0    |

|      |      |    |             |      |      |    |     |
|------|------|----|-------------|------|------|----|-----|
| 1940 | 8 10 | 6  | 3 NOT NAMED | 29.3 | 76.2 | 80 | 0   |
| 1940 | 8 10 | 12 | 3 NOT NAMED | 29.6 | 76.8 | 80 | 0   |
| 1940 | 8 10 | 18 | 3 NOT NAMED | 30.1 | 77.4 | 80 | 0   |
| 1940 | 8 11 | 0  | 3 NOT NAMED | 30.6 | 78.0 | 75 | 0   |
| 1940 | 8 11 | 6  | 3 NOT NAMED | 31.3 | 78.6 | 70 | 0   |
| 1940 | 8 11 | 12 | 3 NOT NAMED | 31.9 | 79.3 | 70 | 0   |
| 1940 | 8 11 | 18 | 3 NOT NAMED | 32.2 | 80.2 | 65 | 975 |
| 1940 | 8 12 | 0  | 3 NOT NAMED | 32.3 | 81.2 | 60 | 0   |
| 1940 | 8 12 | 6  | 3 NOT NAMED | 32.4 | 82.0 | 55 | 0   |
| 1940 | 8 12 | 12 | 3 NOT NAMED | 32.5 | 82.8 | 40 | 0   |
| 1940 | 8 12 | 18 | 3 NOT NAMED | 32.9 | 83.4 | 40 | 0   |
| 1940 | 8 13 | 0  | 3 NOT NAMED | 33.4 | 84.0 | 35 | 0   |
| 1940 | 8 13 | 6  | 3 NOT NAMED | 34.0 | 84.5 | 35 | 0   |
| 1940 | 8 13 | 12 | 3 NOT NAMED | 34.6 | 84.9 | 35 | 0   |
| 1940 | 8 13 | 18 | 3 NOT NAMED | 35.5 | 85.0 | 35 | 0   |
| 1940 | 8 14 | 0  | 3 NOT NAMED | 36.5 | 84.9 | 35 | 0   |
| 1940 | 8 14 | 6  | 3 NOT NAMED | 37.6 | 83.9 | 35 | 0   |
| 1940 | 8 14 | 12 | 3 NOT NAMED | 37.6 | 82.9 | 35 | 0   |
| 1940 | 8 14 | 18 | 3 NOT NAMED | 37.0 | 81.8 | 35 | 0   |
| 1940 | 8 15 | 0  | 3 NOT NAMED | 36.4 | 80.8 | 35 | 0   |
| 1940 | 8 15 | 6  | 3 NOT NAMED | 36.0 | 80.0 | 35 | 0   |
| 1940 | 8 15 | 12 | 3 NOT NAMED | 35.7 | 79.2 | 35 | 0   |
| 1940 | 8 15 | 18 | 3 NOT NAMED | 35.6 | 78.3 | 35 | 0   |
| 1940 | 8 30 | 6  | 4 NOT NAMED | 27.5 | 69.3 | 60 | 0   |
| 1940 | 8 30 | 12 | 4 NOT NAMED | 28.9 | 71.1 | 60 | 0   |
| 1940 | 8 30 | 18 | 4 NOT NAMED | 30.1 | 72.1 | 65 | 0   |
| 1940 | 8 31 | 0  | 4 NOT NAMED | 31.0 | 72.9 | 65 | 0   |
| 1940 | 8 31 | 6  | 4 NOT NAMED | 31.6 | 73.5 | 70 | 0   |
| 1940 | 8 31 | 12 | 4 NOT NAMED | 32.3 | 74.0 | 70 | 0   |
| 1940 | 8 31 | 18 | 4 NOT NAMED | 33.0 | 74.4 | 70 | 0   |
| 1940 | 9 1  | 0  | 4 NOT NAMED | 33.8 | 74.6 | 70 | 0   |
| 1940 | 9 1  | 6  | 4 NOT NAMED | 34.5 | 74.7 | 70 | 0   |
| 1940 | 9 1  | 12 | 4 NOT NAMED | 35.2 | 74.6 | 70 | 0   |
| 1940 | 9 1  | 18 | 4 NOT NAMED | 36.5 | 73.4 | 70 | 0   |
| 1940 | 9 2  | 0  | 4 NOT NAMED | 38.1 | 71.9 | 70 | 0   |
| 1940 | 9 2  | 6  | 4 NOT NAMED | 39.8 | 70.3 | 70 | 0   |
| 1940 | 9 2  | 12 | 4 NOT NAMED | 41.7 | 68.8 | 70 | 0   |
| 1940 | 9 2  | 18 | 4 NOT NAMED | 43.0 | 67.9 | 65 | 0   |
| 1940 | 9 3  | 0  | 4 NOT NAMED | 44.6 | 66.7 | 55 | 0   |
| 1940 | 9 3  | 6  | 4 NOT NAMED | 46.4 | 65.5 | 45 | 0   |
| 1940 | 9 3  | 12 | 4 NOT NAMED | 48.2 | 64.0 | 35 | 0   |
| 1940 | 9 3  | 18 | 4 NOT NAMED | 51.0 | 61.5 | 20 | 0   |
| 1940 | 9 10 | 6  | 5 NOT NAMED | 19.4 | 56.5 | 35 | 0   |
| 1940 | 9 10 | 12 | 5 NOT NAMED | 19.7 | 57.7 | 35 | 0   |

|      |         |             |      |      |    |   |
|------|---------|-------------|------|------|----|---|
| 1940 | 9 10 18 | 5 NOT NAMED | 19.9 | 58.5 | 35 | 0 |
| 1940 | 9 11 0  | 5 NOT NAMED | 20.0 | 59.2 | 35 | 0 |
| 1940 | 9 11 6  | 5 NOT NAMED | 20.1 | 59.8 | 35 | 0 |
| 1940 | 9 11 12 | 5 NOT NAMED | 20.2 | 60.5 | 35 | 0 |
| 1940 | 9 11 18 | 5 NOT NAMED | 20.4 | 61.6 | 40 | 0 |
| 1940 | 9 12 0  | 5 NOT NAMED | 20.6 | 62.9 | 40 | 0 |
| 1940 | 9 12 6  | 5 NOT NAMED | 20.9 | 64.2 | 45 | 0 |
| 1940 | 9 12 12 | 5 NOT NAMED | 21.2 | 65.5 | 55 | 0 |
| 1940 | 9 12 18 | 5 NOT NAMED | 21.6 | 66.8 | 65 | 0 |
| 1940 | 9 13 0  | 5 NOT NAMED | 22.0 | 68.2 | 70 | 0 |
| 1940 | 9 13 6  | 5 NOT NAMED | 22.6 | 69.5 | 80 | 0 |
| 1940 | 9 13 12 | 5 NOT NAMED | 23.3 | 70.6 | 85 | 0 |
| 1940 | 9 13 18 | 5 NOT NAMED | 24.2 | 71.2 | 85 | 0 |
| 1940 | 9 14 0  | 5 NOT NAMED | 25.3 | 71.5 | 85 | 0 |
| 1940 | 9 14 6  | 5 NOT NAMED | 26.5 | 71.2 | 85 | 0 |
| 1940 | 9 14 12 | 5 NOT NAMED | 27.7 | 70.6 | 85 | 0 |
| 1940 | 9 14 18 | 5 NOT NAMED | 28.8 | 70.3 | 85 | 0 |
| 1940 | 9 15 0  | 5 NOT NAMED | 29.9 | 70.1 | 85 | 0 |
| 1940 | 9 15 6  | 5 NOT NAMED | 31.1 | 70.0 | 85 | 0 |
| 1940 | 9 15 12 | 5 NOT NAMED | 32.5 | 69.9 | 85 | 0 |
| 1940 | 9 15 18 | 5 NOT NAMED | 34.0 | 69.8 | 80 | 0 |
| 1940 | 9 16 0  | 5 NOT NAMED | 35.7 | 69.4 | 80 | 0 |
| 1940 | 9 16 6  | 5 NOT NAMED | 37.7 | 68.5 | 75 | 0 |
| 1940 | 9 16 12 | 5 NOT NAMED | 39.7 | 67.6 | 70 | 0 |
| 1940 | 9 16 18 | 5 NOT NAMED | 41.3 | 66.9 | 70 | 0 |
| 1940 | 9 17 0  | 5 NOT NAMED | 42.8 | 66.0 | 65 | 0 |
| 1940 | 9 17 6  | 5 NOT NAMED | 44.7 | 64.2 | 55 | 0 |
| 1940 | 9 17 12 | 5 NOT NAMED | 46.5 | 62.4 | 45 | 0 |
| 1940 | 9 17 18 | 5 NOT NAMED | 47.4 | 61.1 | 40 | 0 |
| 1940 | 9 18 0  | 5 NOT NAMED | 47.8 | 59.6 | 40 | 0 |
| 1940 | 9 18 6  | 5 NOT NAMED | 48.0 | 57.4 | 35 | 0 |
| 1940 | 9 18 12 | 5 NOT NAMED | 48.1 | 55.2 | 35 | 0 |
| 1940 | 9 18 18 | 5 NOT NAMED | 47.9 | 53.0 | 30 | 0 |
| 1940 | 9 19 0  | 5 NOT NAMED | 47.8 | 50.7 | 35 | 0 |
| 1940 | 9 19 6  | 5 NOT NAMED | 48.0 | 46.3 | 30 | 0 |
| 1940 | 9 19 12 | 5 NOT NAMED | 48.8 | 42.0 | 30 | 0 |
| 1940 | 9 19 18 | 5 NOT NAMED | 50.0 | 37.0 | 30 | 0 |
| 1940 | 9 19 6  | 6 NOT NAMED | 12.1 | 82.6 | 35 | 0 |
| 1940 | 9 19 12 | 6 NOT NAMED | 13.2 | 83.4 | 40 | 0 |
| 1940 | 9 19 18 | 6 NOT NAMED | 14.0 | 84.1 | 35 | 0 |
| 1940 | 9 20 0  | 6 NOT NAMED | 14.8 | 84.8 | 35 | 0 |
| 1940 | 9 20 6  | 6 NOT NAMED | 15.5 | 85.4 | 35 | 0 |
| 1940 | 9 20 12 | 6 NOT NAMED | 16.3 | 86.0 | 35 | 0 |
| 1940 | 9 20 18 | 6 NOT NAMED | 17.1 | 87.0 | 40 | 0 |

|      |       |    |             |      |      |    |   |
|------|-------|----|-------------|------|------|----|---|
| 1940 | 9 21  | 0  | 6 NOT NAMED | 18.0 | 88.0 | 40 | 0 |
| 1940 | 9 21  | 6  | 6 NOT NAMED | 18.8 | 88.8 | 35 | 0 |
| 1940 | 9 21  | 12 | 6 NOT NAMED | 19.6 | 89.6 | 35 | 0 |
| 1940 | 9 21  | 18 | 6 NOT NAMED | 20.6 | 90.6 | 35 | 0 |
| 1940 | 9 22  | 0  | 6 NOT NAMED | 21.7 | 91.6 | 35 | 0 |
| 1940 | 9 22  | 6  | 6 NOT NAMED | 22.9 | 92.6 | 40 | 0 |
| 1940 | 9 22  | 12 | 6 NOT NAMED | 24.0 | 93.6 | 40 | 0 |
| 1940 | 9 22  | 18 | 6 NOT NAMED | 24.9 | 94.4 | 40 | 0 |
| 1940 | 9 23  | 0  | 6 NOT NAMED | 25.8 | 95.0 | 40 | 0 |
| 1940 | 9 23  | 6  | 6 NOT NAMED | 26.8 | 95.3 | 40 | 0 |
| 1940 | 9 23  | 12 | 6 NOT NAMED | 27.7 | 95.4 | 40 | 0 |
| 1940 | 9 23  | 18 | 6 NOT NAMED | 28.5 | 95.3 | 40 | 0 |
| 1940 | 9 24  | 0  | 6 NOT NAMED | 29.1 | 94.9 | 40 | 0 |
| 1940 | 9 24  | 6  | 6 NOT NAMED | 29.6 | 93.9 | 40 | 0 |
| 1940 | 9 24  | 12 | 6 NOT NAMED | 29.8 | 92.9 | 35 | 0 |
| 1940 | 9 24  | 18 | 6 NOT NAMED | 30.3 | 91.8 | 30 | 0 |
| 1940 | 9 25  | 0  | 6 NOT NAMED | 30.8 | 90.5 | 20 | 0 |
| 1940 | 9 25  | 6  | 6 NOT NAMED | 32.0 | 88.5 | 15 | 0 |
| 1940 | 10 20 | 18 | 7 NOT NAMED | 10.5 | 78.9 | 35 | 0 |
| 1940 | 10 21 | 0  | 7 NOT NAMED | 11.0 | 79.2 | 35 | 0 |
| 1940 | 10 21 | 6  | 7 NOT NAMED | 11.4 | 79.4 | 40 | 0 |
| 1940 | 10 21 | 12 | 7 NOT NAMED | 11.8 | 79.6 | 40 | 0 |
| 1940 | 10 21 | 18 | 7 NOT NAMED | 12.2 | 79.8 | 45 | 0 |
| 1940 | 10 22 | 0  | 7 NOT NAMED | 12.7 | 80.1 | 45 | 0 |
| 1940 | 10 22 | 6  | 7 NOT NAMED | 13.1 | 80.4 | 45 | 0 |
| 1940 | 10 22 | 12 | 7 NOT NAMED | 13.4 | 80.7 | 40 | 0 |
| 1940 | 10 22 | 18 | 7 NOT NAMED | 13.7 | 81.1 | 40 | 0 |
| 1940 | 10 23 | 0  | 7 NOT NAMED | 13.9 | 81.7 | 40 | 0 |
| 1940 | 10 23 | 6  | 7 NOT NAMED | 13.8 | 82.4 | 35 | 0 |
| 1940 | 10 23 | 12 | 7 NOT NAMED | 13.6 | 83.2 | 35 | 0 |
| 1940 | 10 23 | 18 | 7 NOT NAMED | 13.3 | 84.3 | 30 | 0 |
| 1940 | 10 24 | 18 | 8 NOT NAMED | 20.5 | 72.8 | 35 | 0 |
| 1940 | 10 25 | 0  | 8 NOT NAMED | 22.2 | 72.7 | 35 | 0 |
| 1940 | 10 25 | 6  | 8 NOT NAMED | 23.5 | 72.1 | 40 | 0 |
| 1940 | 10 25 | 12 | 8 NOT NAMED | 24.8 | 71.0 | 40 | 0 |
| 1940 | 10 25 | 18 | 8 NOT NAMED | 26.0 | 69.7 | 40 | 0 |
| 1940 | 10 26 | 0  | 8 NOT NAMED | 27.1 | 68.1 | 35 | 0 |
| 1940 | 10 26 | 6  | 8 NOT NAMED | 28.3 | 66.4 | 30 | 0 |
| 1941 | 9 11  | 6  | 1 NOT NAMED | 27.0 | 87.2 | 35 | 0 |
| 1941 | 9 11  | 12 | 1 NOT NAMED | 27.5 | 87.7 | 35 | 0 |
| 1941 | 9 11  | 18 | 1 NOT NAMED | 27.7 | 87.9 | 35 | 0 |
| 1941 | 9 12  | 0  | 1 NOT NAMED | 27.9 | 88.2 | 35 | 0 |
| 1941 | 9 12  | 6  | 1 NOT NAMED | 28.0 | 88.4 | 35 | 0 |
| 1941 | 9 12  | 12 | 1 NOT NAMED | 28.0 | 88.8 | 35 | 0 |

|      |         |             |      |      |    |      |
|------|---------|-------------|------|------|----|------|
| 1941 | 9 12 18 | 1 NOT NAMED | 27.9 | 89.5 | 35 | 0    |
| 1941 | 9 13 0  | 1 NOT NAMED | 27.9 | 90.4 | 40 | 1003 |
| 1941 | 9 13 6  | 1 NOT NAMED | 28.0 | 91.2 | 40 | 0    |
| 1941 | 9 13 12 | 1 NOT NAMED | 28.1 | 91.8 | 40 | 0    |
| 1941 | 9 13 18 | 1 NOT NAMED | 28.3 | 92.2 | 40 | 0    |
| 1941 | 9 14 0  | 1 NOT NAMED | 28.6 | 92.5 | 40 | 0    |
| 1941 | 9 14 6  | 1 NOT NAMED | 28.9 | 92.8 | 40 | 0    |
| 1941 | 9 14 12 | 1 NOT NAMED | 29.2 | 93.2 | 40 | 0    |
| 1941 | 9 14 18 | 1 NOT NAMED | 29.4 | 93.5 | 40 | 0    |
| 1941 | 9 15 0  | 1 NOT NAMED | 29.6 | 93.8 | 40 | 0    |
| 1941 | 9 15 6  | 1 NOT NAMED | 29.7 | 94.0 | 35 | 0    |
| 1941 | 9 15 12 | 1 NOT NAMED | 29.8 | 94.3 | 35 | 0    |
| 1941 | 9 15 18 | 1 NOT NAMED | 29.9 | 94.9 | 35 | 0    |
| 1941 | 9 16 0  | 1 NOT NAMED | 30.0 | 95.7 | 25 | 0    |
| 1941 | 9 16 6  | 1 NOT NAMED | 30.0 | 96.4 | 20 | 0    |
| 1941 | 9 16 12 | 1 NOT NAMED | 29.9 | 97.2 | 15 | 0    |
| 1941 | 9 16 18 | 1 NOT NAMED | 29.6 | 97.9 | 15 | 0    |
| 1941 | 9 16 12 | 2 NOT NAMED | 25.7 | 83.6 | 35 | 0    |
| 1941 | 9 16 18 | 2 NOT NAMED | 25.5 | 84.5 | 35 | 0    |
| 1941 | 9 17 0  | 2 NOT NAMED | 25.2 | 85.4 | 35 | 0    |
| 1941 | 9 17 6  | 2 NOT NAMED | 25.0 | 86.3 | 35 | 0    |
| 1941 | 9 17 12 | 2 NOT NAMED | 24.7 | 87.1 | 40 | 0    |
| 1941 | 9 17 18 | 2 NOT NAMED | 24.6 | 88.0 | 45 | 0    |
| 1941 | 9 18 0  | 2 NOT NAMED | 24.8 | 88.9 | 50 | 0    |
| 1941 | 9 18 6  | 2 NOT NAMED | 25.4 | 89.5 | 60 | 0    |
| 1941 | 9 18 12 | 2 NOT NAMED | 25.9 | 89.6 | 65 | 0    |
| 1941 | 9 18 18 | 2 NOT NAMED | 26.0 | 89.3 | 70 | 0    |
| 1941 | 9 19 0  | 2 NOT NAMED | 26.0 | 88.9 | 70 | 0    |
| 1941 | 9 19 6  | 2 NOT NAMED | 25.8 | 88.6 | 75 | 0    |
| 1941 | 9 19 12 | 2 NOT NAMED | 25.6 | 88.3 | 75 | 0    |
| 1941 | 9 19 18 | 2 NOT NAMED | 25.3 | 88.1 | 75 | 0    |
| 1941 | 9 20 0  | 2 NOT NAMED | 24.9 | 88.0 | 80 | 0    |
| 1941 | 9 20 6  | 2 NOT NAMED | 24.5 | 87.8 | 80 | 0    |
| 1941 | 9 20 12 | 2 NOT NAMED | 24.1 | 87.6 | 80 | 0    |
| 1941 | 9 20 18 | 2 NOT NAMED | 23.4 | 87.6 | 80 | 0    |
| 1941 | 9 21 0  | 2 NOT NAMED | 23.0 | 88.2 | 80 | 0    |
| 1941 | 9 21 6  | 2 NOT NAMED | 23.4 | 88.7 | 80 | 0    |
| 1941 | 9 21 12 | 2 NOT NAMED | 24.0 | 89.2 | 80 | 0    |
| 1941 | 9 21 18 | 2 NOT NAMED | 24.4 | 89.6 | 80 | 0    |
| 1941 | 9 22 0  | 2 NOT NAMED | 24.9 | 90.0 | 80 | 0    |
| 1941 | 9 22 6  | 2 NOT NAMED | 25.4 | 90.7 | 75 | 0    |
| 1941 | 9 22 12 | 2 NOT NAMED | 25.9 | 91.6 | 75 | 0    |
| 1941 | 9 22 18 | 2 NOT NAMED | 26.3 | 92.6 | 75 | 0    |
| 1941 | 9 23 0  | 2 NOT NAMED | 26.6 | 93.7 | 75 | 0    |



|      |      |    |             |      |      |    |     |
|------|------|----|-------------|------|------|----|-----|
| 1941 | 9 23 | 6  | 2 NOT NAMED | 27.1 | 94.6 | 70 | 0   |
| 1941 | 9 23 | 12 | 2 NOT NAMED | 27.7 | 95.3 | 70 | 0   |
| 1941 | 9 23 | 18 | 2 NOT NAMED | 28.3 | 95.5 | 70 | 0   |
| 1941 | 9 24 | 0  | 2 NOT NAMED | 29.0 | 95.5 | 60 | 977 |
| 1941 | 9 24 | 6  | 2 NOT NAMED | 29.8 | 95.4 | 55 | 0   |
| 1941 | 9 24 | 12 | 2 NOT NAMED | 31.6 | 94.7 | 45 | 0   |
| 1941 | 9 24 | 18 | 2 NOT NAMED | 34.3 | 92.7 | 35 | 0   |
| 1941 | 9 25 | 0  | 2 NOT NAMED | 36.9 | 90.9 | 35 | 0   |
| 1941 | 9 25 | 6  | 2 NOT NAMED | 39.5 | 88.2 | 35 | 0   |
| 1941 | 9 25 | 12 | 2 NOT NAMED | 42.2 | 85.5 | 30 | 0   |
| 1941 | 9 25 | 18 | 2 NOT NAMED | 44.5 | 82.8 | 30 | 0   |
| 1941 | 9 18 | 6  | 3 NOT NAMED | 27.5 | 79.0 | 35 | 0   |
| 1941 | 9 18 | 12 | 3 NOT NAMED | 29.0 | 78.1 | 40 | 0   |
| 1941 | 9 18 | 18 | 3 NOT NAMED | 29.1 | 77.6 | 55 | 0   |
| 1941 | 9 19 | 0  | 3 NOT NAMED | 29.2 | 77.0 | 65 | 0   |
| 1941 | 9 19 | 6  | 3 NOT NAMED | 29.3 | 76.4 | 65 | 0   |
| 1941 | 9 19 | 12 | 3 NOT NAMED | 29.3 | 75.6 | 70 | 0   |
| 1941 | 9 19 | 18 | 3 NOT NAMED | 29.4 | 74.5 | 70 | 0   |
| 1941 | 9 20 | 0  | 3 NOT NAMED | 29.5 | 73.3 | 70 | 0   |
| 1941 | 9 20 | 6  | 3 NOT NAMED | 29.7 | 72.1 | 70 | 0   |
| 1941 | 9 20 | 12 | 3 NOT NAMED | 29.9 | 70.9 | 70 | 0   |
| 1941 | 9 20 | 18 | 3 NOT NAMED | 30.3 | 69.8 | 70 | 0   |
| 1941 | 9 21 | 0  | 3 NOT NAMED | 29.9 | 69.4 | 70 | 0   |
| 1941 | 9 21 | 6  | 3 NOT NAMED | 29.7 | 70.0 | 70 | 0   |
| 1941 | 9 21 | 12 | 3 NOT NAMED | 30.2 | 70.8 | 70 | 0   |
| 1941 | 9 21 | 18 | 3 NOT NAMED | 30.6 | 71.4 | 70 | 0   |
| 1941 | 9 22 | 0  | 3 NOT NAMED | 30.9 | 71.9 | 70 | 0   |
| 1941 | 9 22 | 6  | 3 NOT NAMED | 31.3 | 72.4 | 70 | 0   |
| 1941 | 9 22 | 12 | 3 NOT NAMED | 31.6 | 72.8 | 70 | 0   |
| 1941 | 9 22 | 18 | 3 NOT NAMED | 32.4 | 73.2 | 70 | 0   |
| 1941 | 9 23 | 0  | 3 NOT NAMED | 33.5 | 73.6 | 60 | 0   |
| 1941 | 9 23 | 6  | 3 NOT NAMED | 34.4 | 73.4 | 60 | 0   |
| 1941 | 9 23 | 12 | 3 NOT NAMED | 35.3 | 72.8 | 60 | 0   |
| 1941 | 9 23 | 18 | 3 NOT NAMED | 36.1 | 71.9 | 55 | 0   |
| 1941 | 9 24 | 0  | 3 NOT NAMED | 36.8 | 71.1 | 55 | 0   |
| 1941 | 9 24 | 6  | 3 NOT NAMED | 37.2 | 70.6 | 50 | 0   |
| 1941 | 9 24 | 12 | 3 NOT NAMED | 37.8 | 70.0 | 50 | 0   |
| 1941 | 9 24 | 18 | 3 NOT NAMED | 38.6 | 69.0 | 45 | 0   |
| 1941 | 9 25 | 0  | 3 NOT NAMED | 39.3 | 68.1 | 40 | 0   |
| 1941 | 9 25 | 6  | 3 NOT NAMED | 39.7 | 67.5 | 40 | 0   |
| 1941 | 9 25 | 12 | 3 NOT NAMED | 40.2 | 66.9 | 35 | 0   |
| 1941 | 9 25 | 18 | 3 NOT NAMED | 41.5 | 65.0 | 30 | 0   |
| 1941 | 9 23 | 18 | 4 NOT NAMED | 14.0 | 59.3 | 40 | 0   |
| 1941 | 9 24 | 0  | 4 NOT NAMED | 14.0 | 61.2 | 40 | 0   |

|      |    |    |    |             |      |      |     |     |
|------|----|----|----|-------------|------|------|-----|-----|
| 1941 | 9  | 24 | 6  | 4 NOT NAMED | 14.0 | 63.1 | 45  | 0   |
| 1941 | 9  | 24 | 12 | 4 NOT NAMED | 14.0 | 65.0 | 45  | 0   |
| 1941 | 9  | 24 | 18 | 4 NOT NAMED | 14.0 | 66.3 | 50  | 0   |
| 1941 | 9  | 25 | 0  | 4 NOT NAMED | 14.0 | 67.5 | 55  | 0   |
| 1941 | 9  | 25 | 6  | 4 NOT NAMED | 14.0 | 68.9 | 55  | 0   |
| 1941 | 9  | 25 | 12 | 4 NOT NAMED | 14.0 | 70.2 | 60  | 0   |
| 1941 | 9  | 25 | 18 | 4 NOT NAMED | 14.0 | 71.4 | 65  | 0   |
| 1941 | 9  | 26 | 0  | 4 NOT NAMED | 14.0 | 72.5 | 70  | 0   |
| 1941 | 9  | 26 | 6  | 4 NOT NAMED | 14.0 | 73.8 | 75  | 0   |
| 1941 | 9  | 26 | 12 | 4 NOT NAMED | 14.0 | 75.1 | 80  | 0   |
| 1941 | 9  | 26 | 18 | 4 NOT NAMED | 14.0 | 76.1 | 90  | 0   |
| 1941 | 9  | 27 | 0  | 4 NOT NAMED | 14.0 | 77.2 | 95  | 0   |
| 1941 | 9  | 27 | 6  | 4 NOT NAMED | 14.0 | 78.7 | 100 | 0   |
| 1941 | 9  | 27 | 12 | 4 NOT NAMED | 14.1 | 80.4 | 105 | 0   |
| 1941 | 9  | 27 | 18 | 4 NOT NAMED | 14.5 | 82.4 | 105 | 0   |
| 1941 | 9  | 28 | 0  | 4 NOT NAMED | 15.1 | 84.2 | 100 | 0   |
| 1941 | 9  | 28 | 6  | 4 NOT NAMED | 15.5 | 85.5 | 95  | 0   |
| 1941 | 9  | 28 | 12 | 4 NOT NAMED | 15.9 | 86.8 | 90  | 992 |
| 1941 | 9  | 28 | 18 | 4 NOT NAMED | 16.1 | 88.1 | 80  | 0   |
| 1941 | 9  | 29 | 0  | 4 NOT NAMED | 16.3 | 89.2 | 60  | 0   |
| 1941 | 9  | 29 | 6  | 4 NOT NAMED | 16.8 | 90.5 | 50  | 0   |
| 1941 | 9  | 29 | 12 | 4 NOT NAMED | 17.5 | 92.0 | 40  | 0   |
| 1941 | 9  | 29 | 18 | 4 NOT NAMED | 17.9 | 92.9 | 35  | 0   |
| 1941 | 9  | 30 | 0  | 4 NOT NAMED | 18.5 | 94.0 | 30  | 0   |
| 1941 | 9  | 30 | 6  | 4 NOT NAMED | 19.1 | 95.5 | 25  | 0   |
| 1941 | 9  | 30 | 12 | 4 NOT NAMED | 19.8 | 97.0 | 20  | 0   |
| 1941 | 10 | 3  | 18 | 5 NOT NAMED | 22.6 | 63.0 | 40  | 0   |
| 1941 | 10 | 4  | 0  | 5 NOT NAMED | 22.9 | 64.4 | 50  | 0   |
| 1941 | 10 | 4  | 6  | 5 NOT NAMED | 23.1 | 65.8 | 55  | 0   |
| 1941 | 10 | 4  | 12 | 5 NOT NAMED | 23.4 | 67.2 | 65  | 0   |
| 1941 | 10 | 4  | 18 | 5 NOT NAMED | 23.6 | 68.9 | 70  | 0   |
| 1941 | 10 | 5  | 0  | 5 NOT NAMED | 23.8 | 70.7 | 75  | 0   |
| 1941 | 10 | 5  | 6  | 5 NOT NAMED | 23.9 | 72.1 | 80  | 0   |
| 1941 | 10 | 5  | 12 | 5 NOT NAMED | 24.1 | 73.6 | 85  | 0   |
| 1941 | 10 | 5  | 18 | 5 NOT NAMED | 24.4 | 75.5 | 90  | 0   |
| 1941 | 10 | 6  | 0  | 5 NOT NAMED | 24.8 | 77.4 | 95  | 0   |
| 1941 | 10 | 6  | 6  | 5 NOT NAMED | 25.1 | 79.1 | 100 | 0   |
| 1941 | 10 | 6  | 12 | 5 NOT NAMED | 25.6 | 80.8 | 105 | 0   |
| 1941 | 10 | 6  | 18 | 5 NOT NAMED | 26.7 | 82.4 | 95  | 0   |
| 1941 | 10 | 7  | 0  | 5 NOT NAMED | 28.1 | 83.9 | 80  | 0   |
| 1941 | 10 | 7  | 6  | 5 NOT NAMED | 29.2 | 84.6 | 75  | 0   |
| 1941 | 10 | 7  | 12 | 5 NOT NAMED | 30.3 | 84.7 | 60  | 0   |
| 1941 | 10 | 7  | 18 | 5 NOT NAMED | 31.4 | 84.5 | 60  | 0   |
| 1941 | 10 | 8  | 0  | 5 NOT NAMED | 32.6 | 83.1 | 55  | 0   |

|      |    |    |    |             |      |      |    |   |
|------|----|----|----|-------------|------|------|----|---|
| 1941 | 10 | 8  | 6  | 5 NOT NAMED | 32.9 | 81.8 | 55 | 0 |
| 1941 | 10 | 8  | 12 | 5 NOT NAMED | 33.0 | 80.1 | 50 | 0 |
| 1941 | 10 | 8  | 18 | 5 NOT NAMED | 32.9 | 79.0 | 50 | 0 |
| 1941 | 10 | 9  | 0  | 5 NOT NAMED | 32.6 | 77.7 | 50 | 0 |
| 1941 | 10 | 9  | 6  | 5 NOT NAMED | 32.2 | 76.7 | 50 | 0 |
| 1941 | 10 | 9  | 12 | 5 NOT NAMED | 31.9 | 75.9 | 50 | 0 |
| 1941 | 10 | 9  | 18 | 5 NOT NAMED | 31.2 | 75.0 | 50 | 0 |
| 1941 | 10 | 10 | 0  | 5 NOT NAMED | 30.3 | 74.1 | 50 | 0 |
| 1941 | 10 | 10 | 6  | 5 NOT NAMED | 29.1 | 74.1 | 50 | 0 |
| 1941 | 10 | 10 | 12 | 5 NOT NAMED | 28.8 | 75.2 | 50 | 0 |
| 1941 | 10 | 10 | 18 | 5 NOT NAMED | 29.7 | 74.6 | 50 | 0 |
| 1941 | 10 | 11 | 0  | 5 NOT NAMED | 29.7 | 73.6 | 50 | 0 |
| 1941 | 10 | 11 | 6  | 5 NOT NAMED | 29.5 | 72.2 | 50 | 0 |
| 1941 | 10 | 11 | 12 | 5 NOT NAMED | 29.3 | 70.6 | 45 | 0 |
| 1941 | 10 | 11 | 18 | 5 NOT NAMED | 29.3 | 68.9 | 45 | 0 |
| 1941 | 10 | 12 | 0  | 5 NOT NAMED | 29.4 | 67.1 | 45 | 0 |
| 1941 | 10 | 12 | 6  | 5 NOT NAMED | 29.5 | 65.6 | 40 | 0 |
| 1941 | 10 | 12 | 12 | 5 NOT NAMED | 29.7 | 64.1 | 40 | 0 |
| 1941 | 10 | 12 | 18 | 5 NOT NAMED | 30.4 | 61.8 | 40 | 0 |
| 1941 | 10 | 13 | 0  | 5 NOT NAMED | 31.3 | 59.2 | 40 | 0 |
| 1941 | 10 | 13 | 6  | 5 NOT NAMED | 32.1 | 57.5 | 35 | 0 |
| 1941 | 10 | 13 | 12 | 5 NOT NAMED | 33.1 | 55.7 | 35 | 0 |
| 1941 | 10 | 13 | 18 | 5 NOT NAMED | 34.8 | 52.7 | 35 | 0 |
| 1941 | 10 | 14 | 0  | 5 NOT NAMED | 36.7 | 49.8 | 35 | 0 |
| 1941 | 10 | 14 | 6  | 5 NOT NAMED | 38.1 | 47.4 | 35 | 0 |
| 1941 | 10 | 14 | 12 | 5 NOT NAMED | 39.5 | 45.0 | 35 | 0 |
| 1941 | 10 | 14 | 18 | 5 NOT NAMED | 41.8 | 41.3 | 35 | 0 |
| 1941 | 10 | 15 | 6  | 6 NOT NAMED | 20.7 | 69.0 | 35 | 0 |
| 1941 | 10 | 15 | 12 | 6 NOT NAMED | 21.0 | 69.9 | 35 | 0 |
| 1941 | 10 | 15 | 18 | 6 NOT NAMED | 21.3 | 71.0 | 35 | 0 |
| 1941 | 10 | 16 | 0  | 6 NOT NAMED | 21.7 | 72.1 | 35 | 0 |
| 1941 | 10 | 16 | 6  | 6 NOT NAMED | 22.1 | 73.2 | 35 | 0 |
| 1941 | 10 | 16 | 12 | 6 NOT NAMED | 22.5 | 74.4 | 35 | 0 |
| 1941 | 10 | 16 | 18 | 6 NOT NAMED | 22.8 | 75.7 | 35 | 0 |
| 1941 | 10 | 17 | 0  | 6 NOT NAMED | 23.1 | 77.1 | 35 | 0 |
| 1941 | 10 | 17 | 6  | 6 NOT NAMED | 23.4 | 78.7 | 35 | 0 |
| 1941 | 10 | 17 | 12 | 6 NOT NAMED | 23.6 | 80.0 | 35 | 0 |
| 1941 | 10 | 17 | 18 | 6 NOT NAMED | 23.7 | 80.8 | 40 | 0 |
| 1941 | 10 | 18 | 0  | 6 NOT NAMED | 23.9 | 81.7 | 40 | 0 |
| 1941 | 10 | 18 | 6  | 6 NOT NAMED | 24.3 | 82.6 | 40 | 0 |
| 1941 | 10 | 18 | 12 | 6 NOT NAMED | 24.8 | 83.4 | 40 | 0 |
| 1941 | 10 | 18 | 18 | 6 NOT NAMED | 25.5 | 84.0 | 40 | 0 |
| 1941 | 10 | 19 | 0  | 6 NOT NAMED | 26.1 | 84.2 | 40 | 0 |
| 1941 | 10 | 19 | 6  | 6 NOT NAMED | 26.8 | 84.3 | 45 | 0 |

|      |    |    |    |   |           |      |      |    |   |
|------|----|----|----|---|-----------|------|------|----|---|
| 1941 | 10 | 19 | 12 | 6 | NOT NAMED | 27.4 | 84.3 | 45 | 0 |
| 1941 | 10 | 19 | 18 | 6 | NOT NAMED | 28.1 | 84.2 | 45 | 0 |
| 1941 | 10 | 20 | 0  | 6 | NOT NAMED | 28.9 | 83.9 | 45 | 0 |
| 1941 | 10 | 20 | 6  | 6 | NOT NAMED | 29.3 | 83.5 | 40 | 0 |
| 1941 | 10 | 20 | 12 | 6 | NOT NAMED | 29.6 | 83.1 | 40 | 0 |
| 1941 | 10 | 20 | 18 | 6 | NOT NAMED | 29.7 | 82.7 | 35 | 0 |
| 1941 | 10 | 21 | 0  | 6 | NOT NAMED | 29.7 | 82.4 | 35 | 0 |
| 1941 | 10 | 21 | 6  | 6 | NOT NAMED | 29.6 | 81.9 | 30 | 0 |
| 1941 | 10 | 21 | 12 | 6 | NOT NAMED | 29.3 | 81.7 | 30 | 0 |
| 1941 | 10 | 21 | 18 | 6 | NOT NAMED | 28.9 | 81.7 | 25 | 0 |
| 1941 | 10 | 22 | 0  | 6 | NOT NAMED | 28.5 | 81.8 | 25 | 0 |
| 1941 | 10 | 22 | 6  | 6 | NOT NAMED | 28.1 | 82.1 | 20 | 0 |
| 1942 | 8  | 17 | 18 | 1 | NOT NAMED | 21.3 | 85.5 | 35 | 0 |
| 1942 | 8  | 18 | 0  | 1 | NOT NAMED | 22.2 | 86.0 | 35 | 0 |
| 1942 | 8  | 18 | 6  | 1 | NOT NAMED | 23.1 | 86.5 | 40 | 0 |
| 1942 | 8  | 18 | 12 | 1 | NOT NAMED | 24.0 | 87.0 | 45 | 0 |
| 1942 | 8  | 18 | 18 | 1 | NOT NAMED | 25.2 | 87.6 | 50 | 0 |
| 1942 | 8  | 19 | 0  | 1 | NOT NAMED | 26.5 | 88.3 | 55 | 0 |
| 1942 | 8  | 19 | 6  | 1 | NOT NAMED | 27.4 | 89.3 | 60 | 0 |
| 1942 | 8  | 19 | 12 | 1 | NOT NAMED | 27.9 | 90.3 | 65 | 0 |
| 1942 | 8  | 19 | 18 | 1 | NOT NAMED | 28.0 | 90.8 | 70 | 0 |
| 1942 | 8  | 20 | 0  | 1 | NOT NAMED | 28.1 | 91.3 | 70 | 0 |
| 1942 | 8  | 20 | 6  | 1 | NOT NAMED | 28.1 | 91.7 | 70 | 0 |
| 1942 | 8  | 20 | 12 | 1 | NOT NAMED | 28.2 | 92.2 | 70 | 0 |
| 1942 | 8  | 20 | 18 | 1 | NOT NAMED | 28.4 | 92.9 | 70 | 0 |
| 1942 | 8  | 21 | 0  | 1 | NOT NAMED | 28.7 | 93.6 | 70 | 0 |
| 1942 | 8  | 21 | 6  | 1 | NOT NAMED | 29.1 | 94.2 | 70 | 0 |
| 1942 | 8  | 21 | 12 | 1 | NOT NAMED | 29.4 | 94.7 | 65 | 0 |
| 1942 | 8  | 21 | 18 | 1 | NOT NAMED | 29.8 | 95.1 | 55 | 0 |
| 1942 | 8  | 22 | 0  | 1 | NOT NAMED | 30.5 | 95.8 | 35 | 0 |
| 1942 | 8  | 22 | 6  | 1 | NOT NAMED | 31.5 | 96.1 | 25 | 0 |
| 1942 | 8  | 22 | 12 | 1 | NOT NAMED | 33.0 | 95.8 | 25 | 0 |
| 1942 | 8  | 22 | 18 | 1 | NOT NAMED | 34.3 | 95.2 | 20 | 0 |
| 1942 | 8  | 23 | 0  | 1 | NOT NAMED | 35.7 | 93.8 | 20 | 0 |
| 1942 | 8  | 23 | 6  | 1 | NOT NAMED | 36.8 | 92.7 | 15 | 0 |
| 1942 | 8  | 21 | 6  | 2 | NOT NAMED | 13.9 | 59.9 | 35 | 0 |
| 1942 | 8  | 21 | 12 | 2 | NOT NAMED | 13.9 | 60.8 | 35 | 0 |
| 1942 | 8  | 21 | 18 | 2 | NOT NAMED | 13.9 | 61.7 | 35 | 0 |
| 1942 | 8  | 22 | 0  | 2 | NOT NAMED | 14.0 | 62.8 | 35 | 0 |
| 1942 | 8  | 22 | 6  | 2 | NOT NAMED | 14.1 | 64.1 | 35 | 0 |
| 1942 | 8  | 22 | 12 | 2 | NOT NAMED | 14.1 | 65.4 | 35 | 0 |
| 1942 | 8  | 22 | 18 | 2 | NOT NAMED | 14.2 | 66.4 | 35 | 0 |
| 1942 | 8  | 23 | 0  | 2 | NOT NAMED | 14.4 | 67.4 | 40 | 0 |
| 1942 | 8  | 23 | 6  | 2 | NOT NAMED | 14.6 | 68.8 | 40 | 0 |

|      |         |             |      |       |     |   |
|------|---------|-------------|------|-------|-----|---|
| 1942 | 8 23 12 | 2 NOT NAMED | 14.8 | 70.3  | 40  | 0 |
| 1942 | 8 23 18 | 2 NOT NAMED | 15.0 | 71.3  | 45  | 0 |
| 1942 | 8 24 0  | 2 NOT NAMED | 15.2 | 72.3  | 50  | 0 |
| 1942 | 8 24 6  | 2 NOT NAMED | 15.4 | 73.7  | 55  | 0 |
| 1942 | 8 24 12 | 2 NOT NAMED | 15.7 | 75.0  | 55  | 0 |
| 1942 | 8 24 18 | 2 NOT NAMED | 15.8 | 76.0  | 60  | 0 |
| 1942 | 8 25 0  | 2 NOT NAMED | 16.0 | 77.0  | 65  | 0 |
| 1942 | 8 25 6  | 2 NOT NAMED | 16.4 | 78.2  | 70  | 0 |
| 1942 | 8 25 12 | 2 NOT NAMED | 16.8 | 79.3  | 75  | 0 |
| 1942 | 8 25 18 | 2 NOT NAMED | 17.0 | 79.8  | 80  | 0 |
| 1942 | 8 26 0  | 2 NOT NAMED | 17.2 | 80.3  | 80  | 0 |
| 1942 | 8 26 6  | 2 NOT NAMED | 17.5 | 81.1  | 85  | 0 |
| 1942 | 8 26 12 | 2 NOT NAMED | 17.9 | 81.9  | 85  | 0 |
| 1942 | 8 26 18 | 2 NOT NAMED | 18.4 | 82.7  | 90  | 0 |
| 1942 | 8 27 0  | 2 NOT NAMED | 18.8 | 83.5  | 90  | 0 |
| 1942 | 8 27 6  | 2 NOT NAMED | 19.1 | 84.1  | 90  | 0 |
| 1942 | 8 27 12 | 2 NOT NAMED | 19.4 | 84.6  | 90  | 0 |
| 1942 | 8 27 18 | 2 NOT NAMED | 19.8 | 85.4  | 90  | 0 |
| 1942 | 8 28 0  | 2 NOT NAMED | 20.4 | 86.3  | 90  | 0 |
| 1942 | 8 28 6  | 2 NOT NAMED | 21.3 | 87.6  | 85  | 0 |
| 1942 | 8 28 12 | 2 NOT NAMED | 22.2 | 88.8  | 90  | 0 |
| 1942 | 8 28 18 | 2 NOT NAMED | 22.9 | 89.6  | 95  | 0 |
| 1942 | 8 29 0  | 2 NOT NAMED | 23.6 | 90.5  | 95  | 0 |
| 1942 | 8 29 6  | 2 NOT NAMED | 24.5 | 91.7  | 100 | 0 |
| 1942 | 8 29 12 | 2 NOT NAMED | 25.5 | 92.8  | 100 | 0 |
| 1942 | 8 29 18 | 2 NOT NAMED | 26.5 | 93.8  | 100 | 0 |
| 1942 | 8 30 0  | 2 NOT NAMED | 27.4 | 94.7  | 95  | 0 |
| 1942 | 8 30 6  | 2 NOT NAMED | 28.4 | 95.8  | 70  | 0 |
| 1942 | 8 30 12 | 2 NOT NAMED | 29.3 | 97.0  | 60  | 0 |
| 1942 | 8 30 18 | 2 NOT NAMED | 30.0 | 97.8  | 45  | 0 |
| 1942 | 8 31 0  | 2 NOT NAMED | 30.7 | 98.7  | 35  | 0 |
| 1942 | 8 31 6  | 2 NOT NAMED | 31.4 | 99.8  | 25  | 0 |
| 1942 | 8 31 12 | 2 NOT NAMED | 32.2 | 101.0 | 20  | 0 |
| 1942 | 8 25 6  | 3 NOT NAMED | 27.5 | 62.5  | 65  | 0 |
| 1942 | 8 25 12 | 3 NOT NAMED | 28.6 | 63.0  | 65  | 0 |
| 1942 | 8 25 18 | 3 NOT NAMED | 30.2 | 63.5  | 75  | 0 |
| 1942 | 8 26 0  | 3 NOT NAMED | 31.4 | 63.5  | 90  | 0 |
| 1942 | 8 26 6  | 3 NOT NAMED | 32.3 | 63.1  | 95  | 0 |
| 1942 | 8 26 12 | 3 NOT NAMED | 33.2 | 62.2  | 95  | 0 |
| 1942 | 8 26 18 | 3 NOT NAMED | 34.2 | 60.4  | 95  | 0 |
| 1942 | 8 27 0  | 3 NOT NAMED | 35.1 | 58.7  | 90  | 0 |
| 1942 | 8 27 6  | 3 NOT NAMED | 35.6 | 57.8  | 90  | 0 |
| 1942 | 8 27 12 | 3 NOT NAMED | 35.9 | 57.2  | 85  | 0 |
| 1942 | 8 27 18 | 3 NOT NAMED | 36.3 | 56.7  | 85  | 0 |

|      |      |    |             |      |      |    |   |
|------|------|----|-------------|------|------|----|---|
| 1942 | 8 28 | 0  | 3 NOT NAMED | 36.8 | 56.2 | 80 | 0 |
| 1942 | 8 28 | 6  | 3 NOT NAMED | 37.3 | 55.7 | 80 | 0 |
| 1942 | 8 28 | 12 | 3 NOT NAMED | 37.7 | 55.2 | 75 | 0 |
| 1942 | 8 28 | 18 | 3 NOT NAMED | 38.2 | 54.6 | 75 | 0 |
| 1942 | 8 29 | 0  | 3 NOT NAMED | 38.8 | 53.9 | 70 | 0 |
| 1942 | 8 29 | 6  | 3 NOT NAMED | 39.1 | 52.9 | 70 | 0 |
| 1942 | 8 29 | 12 | 3 NOT NAMED | 39.2 | 51.9 | 65 | 0 |
| 1942 | 8 29 | 18 | 3 NOT NAMED | 39.1 | 51.3 | 60 | 0 |
| 1942 | 8 30 | 0  | 3 NOT NAMED | 38.9 | 50.9 | 55 | 0 |
| 1942 | 8 30 | 6  | 3 NOT NAMED | 38.5 | 50.7 | 55 | 0 |
| 1942 | 8 30 | 12 | 3 NOT NAMED | 38.1 | 50.6 | 50 | 0 |
| 1942 | 8 30 | 18 | 3 NOT NAMED | 37.7 | 50.7 | 45 | 0 |
| 1942 | 8 31 | 0  | 3 NOT NAMED | 37.3 | 51.0 | 45 | 0 |
| 1942 | 8 31 | 6  | 3 NOT NAMED | 37.0 | 51.4 | 45 | 0 |
| 1942 | 8 31 | 12 | 3 NOT NAMED | 36.7 | 51.9 | 45 | 0 |
| 1942 | 8 31 | 18 | 3 NOT NAMED | 36.5 | 52.2 | 45 | 0 |
| 1942 | 9 1  | 0  | 3 NOT NAMED | 36.4 | 52.5 | 40 | 0 |
| 1942 | 9 1  | 6  | 3 NOT NAMED | 36.2 | 53.0 | 40 | 0 |
| 1942 | 9 1  | 12 | 3 NOT NAMED | 36.0 | 53.7 | 35 | 0 |
| 1942 | 9 1  | 18 | 3 NOT NAMED | 35.7 | 54.5 | 35 | 0 |
| 1942 | 9 2  | 0  | 3 NOT NAMED | 35.5 | 55.5 | 30 | 0 |
| 1942 | 9 2  | 6  | 3 NOT NAMED | 35.3 | 56.7 | 30 | 0 |
| 1942 | 9 2  | 12 | 3 NOT NAMED | 35.2 | 57.9 | 25 | 0 |
| 1942 | 9 2  | 18 | 3 NOT NAMED | 35.2 | 59.5 | 25 | 0 |
| 1942 | 9 15 | 18 | 4 NOT NAMED | 14.1 | 58.0 | 35 | 0 |
| 1942 | 9 16 | 0  | 4 NOT NAMED | 14.3 | 60.3 | 35 | 0 |
| 1942 | 9 16 | 6  | 4 NOT NAMED | 14.6 | 62.0 | 35 | 0 |
| 1942 | 9 16 | 12 | 4 NOT NAMED | 14.8 | 63.7 | 40 | 0 |
| 1942 | 9 16 | 18 | 4 NOT NAMED | 15.1 | 65.1 | 40 | 0 |
| 1942 | 9 17 | 0  | 4 NOT NAMED | 15.3 | 66.5 | 40 | 0 |
| 1942 | 9 17 | 6  | 4 NOT NAMED | 15.7 | 68.4 | 45 | 0 |
| 1942 | 9 17 | 12 | 4 NOT NAMED | 16.1 | 70.3 | 45 | 0 |
| 1942 | 9 17 | 18 | 4 NOT NAMED | 16.4 | 71.9 | 45 | 0 |
| 1942 | 9 18 | 0  | 4 NOT NAMED | 16.7 | 73.3 | 45 | 0 |
| 1942 | 9 18 | 6  | 4 NOT NAMED | 17.0 | 74.5 | 45 | 0 |
| 1942 | 9 18 | 12 | 4 NOT NAMED | 17.2 | 75.5 | 45 | 0 |
| 1942 | 9 18 | 18 | 4 NOT NAMED | 17.3 | 76.3 | 45 | 0 |
| 1942 | 9 19 | 0  | 4 NOT NAMED | 17.4 | 77.1 | 45 | 0 |
| 1942 | 9 19 | 6  | 4 NOT NAMED | 17.4 | 77.9 | 45 | 0 |
| 1942 | 9 19 | 12 | 4 NOT NAMED | 17.5 | 78.7 | 45 | 0 |
| 1942 | 9 19 | 18 | 4 NOT NAMED | 17.5 | 79.3 | 45 | 0 |
| 1942 | 9 20 | 0  | 4 NOT NAMED | 17.6 | 79.9 | 45 | 0 |
| 1942 | 9 20 | 6  | 4 NOT NAMED | 17.6 | 80.7 | 45 | 0 |
| 1942 | 9 20 | 12 | 4 NOT NAMED | 17.6 | 81.6 | 45 | 0 |

|      |         |             |      |      |    |   |
|------|---------|-------------|------|------|----|---|
| 1942 | 9 20 18 | 4 NOT NAMED | 17.6 | 82.6 | 45 | 0 |
| 1942 | 9 21 0  | 4 NOT NAMED | 17.6 | 83.5 | 45 | 0 |
| 1942 | 9 21 6  | 4 NOT NAMED | 17.5 | 84.3 | 40 | 0 |
| 1942 | 9 21 12 | 4 NOT NAMED | 17.5 | 85.0 | 40 | 0 |
| 1942 | 9 21 18 | 4 NOT NAMED | 17.4 | 85.6 | 40 | 0 |
| 1942 | 9 22 0  | 4 NOT NAMED | 17.4 | 86.3 | 40 | 0 |
| 1942 | 9 22 6  | 4 NOT NAMED | 17.4 | 87.2 | 40 | 0 |
| 1942 | 9 22 12 | 4 NOT NAMED | 17.3 | 88.0 | 35 | 0 |
| 1942 | 9 22 18 | 4 NOT NAMED | 17.2 | 88.5 | 30 | 0 |
| 1942 | 9 18 12 | 5 NOT NAMED | 30.1 | 65.8 | 35 | 0 |
| 1942 | 9 18 18 | 5 NOT NAMED | 30.6 | 66.0 | 35 | 0 |
| 1942 | 9 19 0  | 5 NOT NAMED | 31.0 | 66.1 | 35 | 0 |
| 1942 | 9 19 6  | 5 NOT NAMED | 31.4 | 66.2 | 40 | 0 |
| 1942 | 9 19 12 | 5 NOT NAMED | 31.8 | 66.3 | 40 | 0 |
| 1942 | 9 19 18 | 5 NOT NAMED | 32.1 | 66.4 | 45 | 0 |
| 1942 | 9 20 0  | 5 NOT NAMED | 32.3 | 66.4 | 45 | 0 |
| 1942 | 9 20 6  | 5 NOT NAMED | 32.6 | 66.5 | 45 | 0 |
| 1942 | 9 20 12 | 5 NOT NAMED | 33.0 | 66.6 | 45 | 0 |
| 1942 | 9 20 18 | 5 NOT NAMED | 33.5 | 66.7 | 45 | 0 |
| 1942 | 9 21 0  | 5 NOT NAMED | 34.0 | 66.8 | 45 | 0 |
| 1942 | 9 21 6  | 5 NOT NAMED | 34.5 | 66.9 | 45 | 0 |
| 1942 | 9 21 12 | 5 NOT NAMED | 35.0 | 67.0 | 40 | 0 |
| 1942 | 9 21 18 | 5 NOT NAMED | 35.9 | 67.0 | 40 | 0 |
| 1942 | 9 22 0  | 5 NOT NAMED | 37.0 | 67.0 | 40 | 0 |
| 1942 | 9 22 6  | 5 NOT NAMED | 37.8 | 66.9 | 40 | 0 |
| 1942 | 9 22 12 | 5 NOT NAMED | 38.7 | 66.5 | 35 | 0 |
| 1942 | 9 22 18 | 5 NOT NAMED | 40.0 | 65.2 | 35 | 0 |
| 1942 | 9 23 0  | 5 NOT NAMED | 41.3 | 63.5 | 35 | 0 |
| 1942 | 9 23 6  | 5 NOT NAMED | 42.3 | 61.5 | 35 | 0 |
| 1942 | 9 23 12 | 5 NOT NAMED | 43.0 | 59.9 | 35 | 0 |
| 1942 | 9 23 18 | 5 NOT NAMED | 43.5 | 59.0 | 35 | 0 |
| 1942 | 9 24 0  | 5 NOT NAMED | 43.9 | 58.2 | 35 | 0 |
| 1942 | 9 24 6  | 5 NOT NAMED | 44.3 | 57.3 | 35 | 0 |
| 1942 | 9 24 12 | 5 NOT NAMED | 44.8 | 56.3 | 35 | 0 |
| 1942 | 9 24 18 | 5 NOT NAMED | 45.7 | 54.9 | 35 | 0 |
| 1942 | 9 25 0  | 5 NOT NAMED | 47.2 | 52.8 | 35 | 0 |
| 1942 | 9 27 6  | 6 NOT NAMED | 28.2 | 60.8 | 35 | 0 |
| 1942 | 9 27 12 | 6 NOT NAMED | 29.0 | 62.7 | 35 | 0 |
| 1942 | 9 27 18 | 6 NOT NAMED | 28.5 | 64.9 | 35 | 0 |
| 1942 | 9 28 0  | 6 NOT NAMED | 28.7 | 66.5 | 35 | 0 |
| 1942 | 9 28 6  | 6 NOT NAMED | 29.7 | 67.7 | 40 | 0 |
| 1942 | 9 28 12 | 6 NOT NAMED | 30.6 | 68.2 | 40 | 0 |
| 1942 | 9 28 18 | 6 NOT NAMED | 31.4 | 68.2 | 45 | 0 |
| 1942 | 9 29 0  | 6 NOT NAMED | 32.2 | 68.0 | 45 | 0 |

|      |    |    |    |             |      |      |    |   |
|------|----|----|----|-------------|------|------|----|---|
| 1942 | 9  | 29 | 6  | 6 NOT NAMED | 33.0 | 67.6 | 45 | 0 |
| 1942 | 9  | 29 | 12 | 6 NOT NAMED | 33.9 | 67.1 | 40 | 0 |
| 1942 | 9  | 29 | 18 | 6 NOT NAMED | 34.8 | 66.4 | 40 | 0 |
| 1942 | 9  | 30 | 0  | 6 NOT NAMED | 35.5 | 65.5 | 35 | 0 |
| 1942 | 9  | 30 | 6  | 6 NOT NAMED | 36.4 | 64.1 | 30 | 0 |
| 1942 | 10 | 1  | 6  | 7 NOT NAMED | 23.1 | 71.9 | 35 | 0 |
| 1942 | 10 | 1  | 12 | 7 NOT NAMED | 25.0 | 70.0 | 35 | 0 |
| 1942 | 10 | 1  | 18 | 7 NOT NAMED | 25.5 | 69.4 | 35 | 0 |
| 1942 | 10 | 2  | 0  | 7 NOT NAMED | 26.5 | 68.4 | 40 | 0 |
| 1942 | 10 | 2  | 6  | 7 NOT NAMED | 27.8 | 67.0 | 40 | 0 |
| 1942 | 10 | 2  | 12 | 7 NOT NAMED | 29.1 | 65.6 | 40 | 0 |
| 1942 | 10 | 2  | 18 | 7 NOT NAMED | 30.4 | 64.2 | 45 | 0 |
| 1942 | 10 | 3  | 0  | 7 NOT NAMED | 31.7 | 62.9 | 45 | 0 |
| 1942 | 10 | 3  | 6  | 7 NOT NAMED | 32.7 | 61.9 | 50 | 0 |
| 1942 | 10 | 3  | 12 | 7 NOT NAMED | 33.8 | 61.0 | 50 | 0 |
| 1942 | 10 | 3  | 18 | 7 NOT NAMED | 35.2 | 59.9 | 50 | 0 |
| 1942 | 10 | 4  | 0  | 7 NOT NAMED | 36.7 | 58.7 | 50 | 0 |
| 1942 | 10 | 4  | 6  | 7 NOT NAMED | 38.2 | 57.7 | 45 | 0 |
| 1942 | 10 | 4  | 12 | 7 NOT NAMED | 39.7 | 56.6 | 40 | 0 |
| 1942 | 10 | 4  | 18 | 7 NOT NAMED | 41.7 | 55.0 | 40 | 0 |
| 1942 | 10 | 5  | 0  | 7 NOT NAMED | 44.0 | 53.0 | 35 | 0 |
| 1942 | 10 | 5  | 6  | 7 NOT NAMED | 46.3 | 50.9 | 35 | 0 |
| 1942 | 10 | 5  | 12 | 7 NOT NAMED | 48.7 | 48.8 | 35 | 0 |
| 1942 | 10 | 5  | 18 | 7 NOT NAMED | 51.0 | 46.7 | 35 | 0 |
| 1942 | 10 | 10 | 6  | 8 NOT NAMED | 29.2 | 70.5 | 35 | 0 |
| 1942 | 10 | 10 | 12 | 8 NOT NAMED | 30.0 | 72.0 | 35 | 0 |
| 1942 | 10 | 10 | 18 | 8 NOT NAMED | 30.4 | 72.7 | 35 | 0 |
| 1942 | 10 | 11 | 0  | 8 NOT NAMED | 31.0 | 73.5 | 35 | 0 |
| 1942 | 10 | 11 | 6  | 8 NOT NAMED | 31.5 | 74.2 | 35 | 0 |
| 1942 | 10 | 11 | 12 | 8 NOT NAMED | 32.3 | 75.0 | 35 | 0 |
| 1942 | 10 | 11 | 18 | 8 NOT NAMED | 33.3 | 75.4 | 35 | 0 |
| 1942 | 10 | 12 | 0  | 8 NOT NAMED | 34.3 | 75.7 | 25 | 0 |
| 1942 | 10 | 12 | 6  | 8 NOT NAMED | 35.0 | 75.9 | 25 | 0 |
| 1942 | 10 | 12 | 12 | 8 NOT NAMED | 35.8 | 76.2 | 25 | 0 |
| 1942 | 10 | 12 | 18 | 8 NOT NAMED | 36.5 | 77.0 | 25 | 0 |
| 1942 | 10 | 13 | 18 | 9 NOT NAMED | 19.3 | 76.1 | 40 | 0 |
| 1942 | 10 | 14 | 0  | 9 NOT NAMED | 21.7 | 76.3 | 35 | 0 |
| 1942 | 10 | 14 | 6  | 9 NOT NAMED | 23.0 | 76.3 | 40 | 0 |
| 1942 | 10 | 14 | 12 | 9 NOT NAMED | 24.2 | 76.3 | 45 | 0 |
| 1942 | 10 | 14 | 18 | 9 NOT NAMED | 24.9 | 76.3 | 45 | 0 |
| 1942 | 10 | 15 | 0  | 9 NOT NAMED | 25.3 | 76.2 | 45 | 0 |
| 1942 | 10 | 15 | 6  | 9 NOT NAMED | 25.9 | 76.2 | 45 | 0 |
| 1942 | 10 | 15 | 12 | 9 NOT NAMED | 26.4 | 76.1 | 45 | 0 |
| 1942 | 10 | 15 | 18 | 9 NOT NAMED | 27.2 | 75.7 | 45 | 0 |



|                            |      |      |    |     |
|----------------------------|------|------|----|-----|
| 1942 10 16 0 9 NOT NAMED   | 28.2 | 75.2 | 45 | 0   |
| 1942 10 16 6 9 NOT NAMED   | 28.9 | 74.7 | 45 | 0   |
| 1942 10 16 12 9 NOT NAMED  | 29.7 | 74.1 | 45 | 0   |
| 1942 10 16 18 9 NOT NAMED  | 30.8 | 73.4 | 45 | 0   |
| 1942 10 17 0 9 NOT NAMED   | 31.9 | 72.6 | 45 | 0   |
| 1942 10 17 6 9 NOT NAMED   | 32.9 | 72.1 | 45 | 0   |
| 1942 10 17 12 9 NOT NAMED  | 33.9 | 71.8 | 45 | 0   |
| 1942 10 17 18 9 NOT NAMED  | 35.6 | 70.9 | 40 | 0   |
| 1942 10 18 0 9 NOT NAMED   | 37.4 | 69.6 | 40 | 0   |
| 1942 10 18 6 9 NOT NAMED   | 38.8 | 68.7 | 35 | 0   |
| 1942 10 18 12 9 NOT NAMED  | 40.1 | 67.7 | 35 | 0   |
| 1942 10 18 18 9 NOT NAMED  | 42.5 | 63.8 | 35 | 0   |
| 1942 11 5 0 10 NOT NAMED   | 17.9 | 65.1 | 35 | 0   |
| 1942 11 5 6 10 NOT NAMED   | 19.9 | 68.2 | 40 | 0   |
| 1942 11 5 12 10 NOT NAMED  | 21.1 | 70.0 | 40 | 0   |
| 1942 11 5 18 10 NOT NAMED  | 22.1 | 71.8 | 45 | 0   |
| 1942 11 6 0 10 NOT NAMED   | 22.7 | 73.5 | 50 | 0   |
| 1942 11 6 6 10 NOT NAMED   | 23.0 | 74.7 | 60 | 0   |
| 1942 11 6 12 10 NOT NAMED  | 22.9 | 75.8 | 65 | 997 |
| 1942 11 6 18 10 NOT NAMED  | 22.5 | 77.3 | 70 | 994 |
| 1942 11 7 0 10 NOT NAMED   | 22.0 | 78.7 | 60 | 0   |
| 1942 11 7 6 10 NOT NAMED   | 21.4 | 79.9 | 60 | 0   |
| 1942 11 7 12 10 NOT NAMED  | 20.7 | 81.0 | 60 | 0   |
| 1942 11 7 18 10 NOT NAMED  | 19.9 | 82.0 | 60 | 0   |
| 1942 11 8 0 10 NOT NAMED   | 19.1 | 83.0 | 65 | 0   |
| 1942 11 8 6 10 NOT NAMED   | 18.5 | 84.1 | 70 | 0   |
| 1942 11 8 12 10 NOT NAMED  | 18.1 | 85.3 | 80 | 0   |
| 1942 11 8 18 10 NOT NAMED  | 17.9 | 86.6 | 85 | 0   |
| 1942 11 9 0 10 NOT NAMED   | 17.8 | 87.8 | 85 | 992 |
| 1942 11 9 6 10 NOT NAMED   | 17.9 | 88.7 | 65 | 0   |
| 1942 11 9 12 10 NOT NAMED  | 18.2 | 89.5 | 55 | 0   |
| 1942 11 9 18 10 NOT NAMED  | 18.7 | 90.2 | 50 | 0   |
| 1942 11 10 0 10 NOT NAMED  | 19.2 | 90.8 | 45 | 999 |
| 1942 11 10 6 10 NOT NAMED  | 19.7 | 91.3 | 40 | 0   |
| 1942 11 10 12 10 NOT NAMED | 20.2 | 91.8 | 40 | 0   |
| 1942 11 10 18 10 NOT NAMED | 21.4 | 91.9 | 40 | 0   |
| 1942 11 11 0 10 NOT NAMED  | 21.9 | 91.8 | 40 | 0   |
| 1942 11 11 6 10 NOT NAMED  | 21.5 | 91.0 | 35 | 0   |
| 1942 11 11 12 10 NOT NAMED | 20.6 | 90.0 | 35 | 0   |
| 1942 11 11 18 10 NOT NAMED | 20.0 | 88.8 | 25 | 0   |
| 1943 7 25 18 1 NOT NAMED   | 28.0 | 87.7 | 50 | 0   |
| 1943 7 26 0 1 NOT NAMED    | 28.1 | 89.3 | 65 | 0   |
| 1943 7 26 6 1 NOT NAMED    | 28.1 | 90.2 | 70 | 0   |
| 1943 7 26 12 1 NOT NAMED   | 28.2 | 91.1 | 70 | 0   |

|      |         |             |      |      |    |   |
|------|---------|-------------|------|------|----|---|
| 1943 | 7 26 18 | 1 NOT NAMED | 28.5 | 92.0 | 70 | 0 |
| 1943 | 7 27 0  | 1 NOT NAMED | 28.8 | 92.9 | 75 | 0 |
| 1943 | 7 27 6  | 1 NOT NAMED | 29.0 | 93.6 | 75 | 0 |
| 1943 | 7 27 12 | 1 NOT NAMED | 29.3 | 94.1 | 75 | 0 |
| 1943 | 7 27 18 | 1 NOT NAMED | 29.5 | 94.7 | 75 | 0 |
| 1943 | 7 28 0  | 1 NOT NAMED | 29.8 | 95.2 | 55 | 0 |
| 1943 | 7 28 6  | 1 NOT NAMED | 30.0 | 95.7 | 50 | 0 |
| 1943 | 7 28 12 | 1 NOT NAMED | 30.4 | 96.2 | 40 | 0 |
| 1943 | 7 28 18 | 1 NOT NAMED | 30.6 | 96.7 | 40 | 0 |
| 1943 | 7 29 0  | 1 NOT NAMED | 31.0 | 97.0 | 35 | 0 |
| 1943 | 7 29 6  | 1 NOT NAMED | 31.5 | 97.3 | 25 | 0 |
| 1943 | 7 29 12 | 1 NOT NAMED | 32.0 | 97.4 | 25 | 0 |
| 1943 | 7 29 18 | 1 NOT NAMED | 32.5 | 97.4 | 15 | 0 |
| 1943 | 8 13 12 | 2 NOT NAMED | 17.1 | 60.5 | 35 | 0 |
| 1943 | 8 13 18 | 2 NOT NAMED | 17.5 | 61.7 | 35 | 0 |
| 1943 | 8 14 0  | 2 NOT NAMED | 18.0 | 62.9 | 40 | 0 |
| 1943 | 8 14 6  | 2 NOT NAMED | 18.7 | 64.3 | 40 | 0 |
| 1943 | 8 14 12 | 2 NOT NAMED | 19.4 | 65.6 | 40 | 0 |
| 1943 | 8 14 18 | 2 NOT NAMED | 20.1 | 66.9 | 45 | 0 |
| 1943 | 8 15 0  | 2 NOT NAMED | 20.9 | 68.1 | 45 | 0 |
| 1943 | 8 15 6  | 2 NOT NAMED | 21.8 | 69.3 | 45 | 0 |
| 1943 | 8 15 12 | 2 NOT NAMED | 22.8 | 70.4 | 45 | 0 |
| 1943 | 8 15 18 | 2 NOT NAMED | 23.7 | 71.0 | 45 | 0 |
| 1943 | 8 16 0  | 2 NOT NAMED | 24.5 | 71.3 | 50 | 0 |
| 1943 | 8 16 6  | 2 NOT NAMED | 25.2 | 71.6 | 50 | 0 |
| 1943 | 8 16 12 | 2 NOT NAMED | 25.8 | 71.9 | 50 | 0 |
| 1943 | 8 16 18 | 2 NOT NAMED | 26.6 | 72.3 | 50 | 0 |
| 1943 | 8 17 0  | 2 NOT NAMED | 27.5 | 72.8 | 50 | 0 |
| 1943 | 8 17 6  | 2 NOT NAMED | 28.6 | 73.6 | 50 | 0 |
| 1943 | 8 17 12 | 2 NOT NAMED | 29.6 | 74.4 | 50 | 0 |
| 1943 | 8 17 18 | 2 NOT NAMED | 30.3 | 75.0 | 50 | 0 |
| 1943 | 8 18 0  | 2 NOT NAMED | 31.0 | 75.4 | 50 | 0 |
| 1943 | 8 18 6  | 2 NOT NAMED | 31.8 | 75.4 | 45 | 0 |
| 1943 | 8 18 12 | 2 NOT NAMED | 32.7 | 74.8 | 45 | 0 |
| 1943 | 8 18 18 | 2 NOT NAMED | 33.8 | 73.7 | 40 | 0 |
| 1943 | 8 19 0  | 2 NOT NAMED | 34.8 | 72.5 | 40 | 0 |
| 1943 | 8 19 6  | 2 NOT NAMED | 35.8 | 71.3 | 40 | 0 |
| 1943 | 8 19 12 | 2 NOT NAMED | 36.7 | 70.0 | 35 | 0 |
| 1943 | 8 19 18 | 2 NOT NAMED | 38.3 | 67.9 | 30 | 0 |
| 1943 | 8 19 6  | 3 NOT NAMED | 13.5 | 55.5 | 50 | 0 |
| 1943 | 8 19 12 | 3 NOT NAMED | 14.1 | 56.2 | 55 | 0 |
| 1943 | 8 19 18 | 3 NOT NAMED | 14.6 | 56.6 | 60 | 0 |
| 1943 | 8 20 0  | 3 NOT NAMED | 15.1 | 57.0 | 65 | 0 |
| 1943 | 8 20 6  | 3 NOT NAMED | 15.6 | 57.5 | 70 | 0 |

|      |   |    |    |   |           |      |      |     |   |
|------|---|----|----|---|-----------|------|------|-----|---|
| 1943 | 8 | 20 | 12 | 3 | NOT NAMED | 16.1 | 58.0 | 70  | 0 |
| 1943 | 8 | 20 | 18 | 3 | NOT NAMED | 16.7 | 58.7 | 75  | 0 |
| 1943 | 8 | 21 | 0  | 3 | NOT NAMED | 17.4 | 59.4 | 80  | 0 |
| 1943 | 8 | 21 | 6  | 3 | NOT NAMED | 18.0 | 59.9 | 85  | 0 |
| 1943 | 8 | 21 | 12 | 3 | NOT NAMED | 18.6 | 60.4 | 85  | 0 |
| 1943 | 8 | 21 | 18 | 3 | NOT NAMED | 19.5 | 61.1 | 90  | 0 |
| 1943 | 8 | 22 | 0  | 3 | NOT NAMED | 20.4 | 61.8 | 90  | 0 |
| 1943 | 8 | 22 | 6  | 3 | NOT NAMED | 21.0 | 62.2 | 95  | 0 |
| 1943 | 8 | 22 | 12 | 3 | NOT NAMED | 21.6 | 62.7 | 95  | 0 |
| 1943 | 8 | 22 | 18 | 3 | NOT NAMED | 22.6 | 63.4 | 100 | 0 |
| 1943 | 8 | 23 | 0  | 3 | NOT NAMED | 23.6 | 64.1 | 105 | 0 |
| 1943 | 8 | 23 | 6  | 3 | NOT NAMED | 24.3 | 64.7 | 105 | 0 |
| 1943 | 8 | 23 | 12 | 3 | NOT NAMED | 25.0 | 65.2 | 110 | 0 |
| 1943 | 8 | 23 | 18 | 3 | NOT NAMED | 25.8 | 65.8 | 115 | 0 |
| 1943 | 8 | 24 | 0  | 3 | NOT NAMED | 26.8 | 66.3 | 115 | 0 |
| 1943 | 8 | 24 | 6  | 3 | NOT NAMED | 28.3 | 66.8 | 120 | 0 |
| 1943 | 8 | 24 | 12 | 3 | NOT NAMED | 30.0 | 67.3 | 120 | 0 |
| 1943 | 8 | 24 | 18 | 3 | NOT NAMED | 31.7 | 67.5 | 120 | 0 |
| 1943 | 8 | 25 | 0  | 3 | NOT NAMED | 33.4 | 67.4 | 120 | 0 |
| 1943 | 8 | 25 | 6  | 3 | NOT NAMED | 34.7 | 67.1 | 110 | 0 |
| 1943 | 8 | 25 | 12 | 3 | NOT NAMED | 36.0 | 66.5 | 100 | 0 |
| 1943 | 8 | 25 | 18 | 3 | NOT NAMED | 37.8 | 65.2 | 90  | 0 |
| 1943 | 8 | 26 | 0  | 3 | NOT NAMED | 39.7 | 62.6 | 75  | 0 |
| 1943 | 8 | 26 | 6  | 3 | NOT NAMED | 41.8 | 57.7 | 65  | 0 |
| 1943 | 8 | 26 | 12 | 3 | NOT NAMED | 43.9 | 53.0 | 60  | 0 |
| 1943 | 8 | 26 | 18 | 3 | NOT NAMED | 45.6 | 50.3 | 55  | 0 |
| 1943 | 8 | 27 | 0  | 3 | NOT NAMED | 47.4 | 47.5 | 50  | 0 |
| 1943 | 8 | 27 | 6  | 3 | NOT NAMED | 49.7 | 44.8 | 45  | 0 |
| 1943 | 8 | 27 | 12 | 3 | NOT NAMED | 52.0 | 42.0 | 45  | 0 |
| 1943 | 9 | 1  | 6  | 4 | NOT NAMED | 23.5 | 58.4 | 60  | 0 |
| 1943 | 9 | 1  | 12 | 4 | NOT NAMED | 25.3 | 59.9 | 70  | 0 |
| 1943 | 9 | 1  | 18 | 4 | NOT NAMED | 26.4 | 60.9 | 75  | 0 |
| 1943 | 9 | 2  | 0  | 4 | NOT NAMED | 27.6 | 61.6 | 80  | 0 |
| 1943 | 9 | 2  | 6  | 4 | NOT NAMED | 28.8 | 62.0 | 80  | 0 |
| 1943 | 9 | 2  | 12 | 4 | NOT NAMED | 30.0 | 62.2 | 85  | 0 |
| 1943 | 9 | 2  | 18 | 4 | NOT NAMED | 30.6 | 62.2 | 85  | 0 |
| 1943 | 9 | 3  | 0  | 4 | NOT NAMED | 31.0 | 62.2 | 90  | 0 |
| 1943 | 9 | 3  | 6  | 4 | NOT NAMED | 31.4 | 62.1 | 95  | 0 |
| 1943 | 9 | 3  | 12 | 4 | NOT NAMED | 31.8 | 61.9 | 95  | 0 |
| 1943 | 9 | 3  | 18 | 4 | NOT NAMED | 32.1 | 61.6 | 100 | 0 |
| 1943 | 9 | 4  | 0  | 4 | NOT NAMED | 32.3 | 61.3 | 100 | 0 |
| 1943 | 9 | 4  | 6  | 4 | NOT NAMED | 32.5 | 60.9 | 105 | 0 |
| 1943 | 9 | 4  | 12 | 4 | NOT NAMED | 32.7 | 60.6 | 105 | 0 |
| 1943 | 9 | 4  | 18 | 4 | NOT NAMED | 32.9 | 60.4 | 105 | 0 |

|      |   |    |    |             |      |      |     |   |
|------|---|----|----|-------------|------|------|-----|---|
| 1943 | 9 | 5  | 0  | 4 NOT NAMED | 33.2 | 60.3 | 100 | 0 |
| 1943 | 9 | 5  | 6  | 4 NOT NAMED | 33.5 | 60.2 | 95  | 0 |
| 1943 | 9 | 5  | 12 | 4 NOT NAMED | 33.9 | 60.1 | 95  | 0 |
| 1943 | 9 | 5  | 18 | 4 NOT NAMED | 34.3 | 60.1 | 95  | 0 |
| 1943 | 9 | 6  | 0  | 4 NOT NAMED | 34.8 | 60.3 | 95  | 0 |
| 1943 | 9 | 6  | 6  | 4 NOT NAMED | 35.0 | 60.5 | 95  | 0 |
| 1943 | 9 | 6  | 12 | 4 NOT NAMED | 35.3 | 60.8 | 95  | 0 |
| 1943 | 9 | 6  | 18 | 4 NOT NAMED | 35.6 | 61.4 | 95  | 0 |
| 1943 | 9 | 7  | 0  | 4 NOT NAMED | 35.9 | 62.0 | 95  | 0 |
| 1943 | 9 | 7  | 6  | 4 NOT NAMED | 36.1 | 62.6 | 95  | 0 |
| 1943 | 9 | 7  | 12 | 4 NOT NAMED | 36.4 | 63.2 | 95  | 0 |
| 1943 | 9 | 7  | 18 | 4 NOT NAMED | 36.8 | 63.6 | 90  | 0 |
| 1943 | 9 | 8  | 0  | 4 NOT NAMED | 37.2 | 63.9 | 90  | 0 |
| 1943 | 9 | 8  | 6  | 4 NOT NAMED | 37.7 | 64.1 | 90  | 0 |
| 1943 | 9 | 8  | 12 | 4 NOT NAMED | 38.2 | 64.3 | 85  | 0 |
| 1943 | 9 | 8  | 18 | 4 NOT NAMED | 38.8 | 64.6 | 80  | 0 |
| 1943 | 9 | 9  | 0  | 4 NOT NAMED | 40.1 | 64.5 | 75  | 0 |
| 1943 | 9 | 9  | 6  | 4 NOT NAMED | 42.2 | 63.3 | 70  | 0 |
| 1943 | 9 | 9  | 12 | 4 NOT NAMED | 44.2 | 62.0 | 60  | 0 |
| 1943 | 9 | 9  | 18 | 4 NOT NAMED | 47.0 | 59.2 | 55  | 0 |
| 1943 | 9 | 10 | 0  | 4 NOT NAMED | 49.5 | 55.5 | 45  | 0 |
| 1943 | 9 | 13 | 6  | 5 NOT NAMED | 28.2 | 73.9 | 40  | 0 |
| 1943 | 9 | 13 | 12 | 5 NOT NAMED | 29.4 | 73.6 | 40  | 0 |
| 1943 | 9 | 13 | 18 | 5 NOT NAMED | 30.1 | 73.6 | 45  | 0 |
| 1943 | 9 | 14 | 0  | 5 NOT NAMED | 31.1 | 73.8 | 45  | 0 |
| 1943 | 9 | 14 | 6  | 5 NOT NAMED | 32.5 | 73.9 | 45  | 0 |
| 1943 | 9 | 14 | 12 | 5 NOT NAMED | 34.1 | 73.8 | 45  | 0 |
| 1943 | 9 | 14 | 18 | 5 NOT NAMED | 36.0 | 73.4 | 45  | 0 |
| 1943 | 9 | 15 | 0  | 5 NOT NAMED | 37.8 | 72.4 | 45  | 0 |
| 1943 | 9 | 15 | 6  | 5 NOT NAMED | 39.1 | 70.9 | 45  | 0 |
| 1943 | 9 | 15 | 12 | 5 NOT NAMED | 40.5 | 68.9 | 40  | 0 |
| 1943 | 9 | 15 | 18 | 5 NOT NAMED | 42.2 | 66.5 | 40  | 0 |
| 1943 | 9 | 16 | 0  | 5 NOT NAMED | 44.0 | 64.1 | 40  | 0 |
| 1943 | 9 | 16 | 6  | 5 NOT NAMED | 45.5 | 62.1 | 35  | 0 |
| 1943 | 9 | 16 | 12 | 5 NOT NAMED | 47.1 | 60.1 | 35  | 0 |
| 1943 | 9 | 16 | 18 | 5 NOT NAMED | 49.0 | 57.3 | 35  | 0 |
| 1943 | 9 | 17 | 0  | 5 NOT NAMED | 51.2 | 53.8 | 35  | 0 |
| 1943 | 9 | 17 | 6  | 5 NOT NAMED | 54.0 | 49.0 | 35  | 0 |
| 1943 | 9 | 15 | 18 | 6 NOT NAMED | 23.8 | 93.9 | 60  | 0 |
| 1943 | 9 | 16 | 0  | 6 NOT NAMED | 24.6 | 94.0 | 65  | 0 |
| 1943 | 9 | 16 | 6  | 6 NOT NAMED | 25.5 | 94.2 | 70  | 0 |
| 1943 | 9 | 16 | 12 | 6 NOT NAMED | 26.5 | 94.5 | 75  | 0 |
| 1943 | 9 | 16 | 18 | 6 NOT NAMED | 27.0 | 94.7 | 80  | 0 |
| 1943 | 9 | 17 | 0  | 6 NOT NAMED | 27.3 | 95.0 | 80  | 0 |

|      |    |    |    |             |      |      |    |   |
|------|----|----|----|-------------|------|------|----|---|
| 1943 | 9  | 17 | 6  | 6 NOT NAMED | 27.3 | 95.4 | 85 | 0 |
| 1943 | 9  | 17 | 12 | 6 NOT NAMED | 26.9 | 95.7 | 85 | 0 |
| 1943 | 9  | 17 | 18 | 6 NOT NAMED | 26.6 | 95.7 | 85 | 0 |
| 1943 | 9  | 18 | 0  | 6 NOT NAMED | 26.4 | 95.3 | 80 | 0 |
| 1943 | 9  | 18 | 6  | 6 NOT NAMED | 26.7 | 94.8 | 75 | 0 |
| 1943 | 9  | 18 | 12 | 6 NOT NAMED | 27.2 | 94.4 | 75 | 0 |
| 1943 | 9  | 18 | 18 | 6 NOT NAMED | 27.4 | 94.2 | 70 | 0 |
| 1943 | 9  | 19 | 0  | 6 NOT NAMED | 27.7 | 93.9 | 60 | 0 |
| 1943 | 9  | 19 | 6  | 6 NOT NAMED | 28.0 | 93.7 | 60 | 0 |
| 1943 | 9  | 19 | 12 | 6 NOT NAMED | 28.4 | 93.4 | 50 | 0 |
| 1943 | 9  | 19 | 18 | 6 NOT NAMED | 28.9 | 93.1 | 40 | 0 |
| 1943 | 9  | 20 | 0  | 6 NOT NAMED | 29.4 | 92.8 | 35 | 0 |
| 1943 | 9  | 20 | 6  | 6 NOT NAMED | 30.1 | 92.4 | 25 | 0 |
| 1943 | 9  | 28 | 6  | 7 NOT NAMED | 29.0 | 65.8 | 35 | 0 |
| 1943 | 9  | 28 | 12 | 7 NOT NAMED | 30.0 | 66.3 | 35 | 0 |
| 1943 | 9  | 28 | 18 | 7 NOT NAMED | 31.5 | 67.0 | 40 | 0 |
| 1943 | 9  | 29 | 0  | 7 NOT NAMED | 32.7 | 67.7 | 40 | 0 |
| 1943 | 9  | 29 | 6  | 7 NOT NAMED | 33.8 | 68.5 | 45 | 0 |
| 1943 | 9  | 29 | 12 | 7 NOT NAMED | 34.6 | 69.3 | 45 | 0 |
| 1943 | 9  | 29 | 18 | 7 NOT NAMED | 35.2 | 70.1 | 50 | 0 |
| 1943 | 9  | 30 | 0  | 7 NOT NAMED | 35.7 | 70.9 | 50 | 0 |
| 1943 | 9  | 30 | 6  | 7 NOT NAMED | 36.1 | 71.7 | 50 | 0 |
| 1943 | 9  | 30 | 12 | 7 NOT NAMED | 36.4 | 72.4 | 50 | 0 |
| 1943 | 9  | 30 | 18 | 7 NOT NAMED | 36.7 | 73.7 | 45 | 0 |
| 1943 | 10 | 1  | 0  | 7 NOT NAMED | 37.8 | 75.0 | 35 | 0 |
| 1943 | 10 | 1  | 6  | 7 NOT NAMED | 38.8 | 75.7 | 30 | 0 |
| 1943 | 10 | 1  | 12 | 7 NOT NAMED | 39.8 | 76.3 | 25 | 0 |
| 1943 | 10 | 1  | 6  | 8 NOT NAMED | 26.3 | 58.3 | 60 | 0 |
| 1943 | 10 | 1  | 12 | 8 NOT NAMED | 27.8 | 60.8 | 60 | 0 |
| 1943 | 10 | 1  | 18 | 8 NOT NAMED | 28.8 | 62.2 | 60 | 0 |
| 1943 | 10 | 2  | 0  | 8 NOT NAMED | 30.3 | 63.6 | 60 | 0 |
| 1943 | 10 | 2  | 6  | 8 NOT NAMED | 32.3 | 64.9 | 60 | 0 |
| 1943 | 10 | 2  | 12 | 8 NOT NAMED | 34.3 | 65.9 | 55 | 0 |
| 1943 | 10 | 2  | 18 | 8 NOT NAMED | 36.4 | 66.0 | 55 | 0 |
| 1943 | 10 | 3  | 0  | 8 NOT NAMED | 38.4 | 64.9 | 50 | 0 |
| 1943 | 10 | 3  | 6  | 8 NOT NAMED | 40.2 | 63.2 | 45 | 0 |
| 1943 | 10 | 3  | 12 | 8 NOT NAMED | 41.8 | 60.9 | 45 | 0 |
| 1943 | 10 | 3  | 18 | 8 NOT NAMED | 43.2 | 58.2 | 40 | 0 |
| 1943 | 10 | 4  | 0  | 8 NOT NAMED | 44.5 | 55.1 | 35 | 0 |
| 1943 | 10 | 4  | 6  | 8 NOT NAMED | 45.5 | 53.4 | 35 | 0 |
| 1943 | 10 | 11 | 6  | 9 NOT NAMED | 13.6 | 59.9 | 45 | 0 |
| 1943 | 10 | 11 | 12 | 9 NOT NAMED | 13.7 | 60.6 | 50 | 0 |
| 1943 | 10 | 11 | 18 | 9 NOT NAMED | 13.8 | 61.3 | 50 | 0 |
| 1943 | 10 | 12 | 0  | 9 NOT NAMED | 13.8 | 62.2 | 55 | 0 |

|      |    |    |    |    |           |      |      |    |   |
|------|----|----|----|----|-----------|------|------|----|---|
| 1943 | 10 | 12 | 6  | 9  | NOT NAMED | 13.8 | 63.3 | 60 | 0 |
| 1943 | 10 | 12 | 12 | 9  | NOT NAMED | 13.8 | 64.3 | 65 | 0 |
| 1943 | 10 | 12 | 18 | 9  | NOT NAMED | 13.8 | 65.0 | 70 | 0 |
| 1943 | 10 | 13 | 0  | 9  | NOT NAMED | 13.9 | 65.7 | 70 | 0 |
| 1943 | 10 | 13 | 6  | 9  | NOT NAMED | 14.1 | 66.9 | 75 | 0 |
| 1943 | 10 | 13 | 12 | 9  | NOT NAMED | 14.7 | 67.6 | 75 | 0 |
| 1943 | 10 | 13 | 18 | 9  | NOT NAMED | 15.2 | 67.9 | 75 | 0 |
| 1943 | 10 | 14 | 0  | 9  | NOT NAMED | 15.8 | 68.0 | 75 | 0 |
| 1943 | 10 | 14 | 6  | 9  | NOT NAMED | 16.6 | 68.1 | 80 | 0 |
| 1943 | 10 | 14 | 12 | 9  | NOT NAMED | 17.5 | 68.2 | 80 | 0 |
| 1943 | 10 | 14 | 18 | 9  | NOT NAMED | 18.1 | 68.2 | 80 | 0 |
| 1943 | 10 | 15 | 0  | 9  | NOT NAMED | 19.0 | 68.3 | 80 | 0 |
| 1943 | 10 | 15 | 6  | 9  | NOT NAMED | 20.5 | 68.4 | 85 | 0 |
| 1943 | 10 | 15 | 12 | 9  | NOT NAMED | 22.0 | 68.5 | 85 | 0 |
| 1943 | 10 | 15 | 18 | 9  | NOT NAMED | 23.5 | 68.6 | 90 | 0 |
| 1943 | 10 | 16 | 0  | 9  | NOT NAMED | 25.0 | 68.7 | 90 | 0 |
| 1943 | 10 | 16 | 6  | 9  | NOT NAMED | 26.7 | 68.8 | 95 | 0 |
| 1943 | 10 | 16 | 12 | 9  | NOT NAMED | 28.7 | 68.9 | 95 | 0 |
| 1943 | 10 | 16 | 18 | 9  | NOT NAMED | 31.0 | 69.0 | 95 | 0 |
| 1943 | 10 | 17 | 0  | 9  | NOT NAMED | 33.6 | 68.8 | 60 | 0 |
| 1943 | 10 | 17 | 6  | 9  | NOT NAMED | 37.0 | 68.4 | 45 | 0 |
| 1943 | 10 | 17 | 12 | 9  | NOT NAMED | 40.5 | 68.0 | 40 | 0 |
| 1943 | 10 | 17 | 18 | 9  | NOT NAMED | 44.6 | 66.5 | 35 | 0 |
| 1943 | 10 | 18 | 0  | 9  | NOT NAMED | 48.0 | 67.0 | 35 | 0 |
| 1943 | 10 | 20 | 18 | 10 | NOT NAMED | 15.5 | 80.3 | 35 | 0 |
| 1943 | 10 | 21 | 0  | 10 | NOT NAMED | 16.0 | 80.9 | 35 | 0 |
| 1943 | 10 | 21 | 6  | 10 | NOT NAMED | 16.4 | 81.6 | 40 | 0 |
| 1943 | 10 | 21 | 12 | 10 | NOT NAMED | 16.7 | 82.4 | 40 | 0 |
| 1943 | 10 | 21 | 18 | 10 | NOT NAMED | 17.1 | 83.5 | 40 | 0 |
| 1943 | 10 | 22 | 0  | 10 | NOT NAMED | 17.3 | 84.8 | 40 | 0 |
| 1943 | 10 | 22 | 6  | 10 | NOT NAMED | 17.3 | 86.3 | 40 | 0 |
| 1943 | 10 | 22 | 12 | 10 | NOT NAMED | 16.8 | 87.8 | 40 | 0 |
| 1943 | 10 | 22 | 18 | 10 | NOT NAMED | 16.1 | 88.8 | 35 | 0 |
| 1943 | 10 | 23 | 0  | 10 | NOT NAMED | 15.3 | 89.0 | 35 | 0 |
| 1943 | 10 | 23 | 6  | 10 | NOT NAMED | 15.0 | 90.5 | 30 | 0 |
| 1944 | 7  | 13 | 6  | 1  | NOT NAMED | 19.6 | 67.9 | 35 | 0 |
| 1944 | 7  | 13 | 12 | 1  | NOT NAMED | 20.7 | 68.8 | 35 | 0 |
| 1944 | 7  | 13 | 18 | 1  | NOT NAMED | 21.7 | 69.8 | 40 | 0 |
| 1944 | 7  | 14 | 0  | 1  | NOT NAMED | 22.6 | 70.8 | 40 | 0 |
| 1944 | 7  | 14 | 6  | 1  | NOT NAMED | 23.4 | 71.8 | 45 | 0 |
| 1944 | 7  | 14 | 12 | 1  | NOT NAMED | 24.3 | 72.8 | 45 | 0 |
| 1944 | 7  | 14 | 18 | 1  | NOT NAMED | 25.1 | 73.7 | 50 | 0 |
| 1944 | 7  | 15 | 0  | 1  | NOT NAMED | 25.9 | 74.4 | 50 | 0 |
| 1944 | 7  | 15 | 6  | 1  | NOT NAMED | 27.4 | 75.5 | 55 | 0 |

|      |         |             |      |      |    |   |
|------|---------|-------------|------|------|----|---|
| 1944 | 7 15 12 | 1 NOT NAMED | 28.9 | 76.2 | 60 | 0 |
| 1944 | 7 15 18 | 1 NOT NAMED | 29.6 | 76.2 | 60 | 0 |
| 1944 | 7 16 0  | 1 NOT NAMED | 30.2 | 76.1 | 65 | 0 |
| 1944 | 7 16 6  | 1 NOT NAMED | 30.9 | 75.8 | 70 | 0 |
| 1944 | 7 16 12 | 1 NOT NAMED | 31.4 | 75.5 | 70 | 0 |
| 1944 | 7 16 18 | 1 NOT NAMED | 31.8 | 75.2 | 75 | 0 |
| 1944 | 7 17 0  | 1 NOT NAMED | 32.1 | 74.8 | 80 | 0 |
| 1944 | 7 17 6  | 1 NOT NAMED | 32.4 | 74.4 | 80 | 0 |
| 1944 | 7 17 12 | 1 NOT NAMED | 32.8 | 73.8 | 80 | 0 |
| 1944 | 7 17 18 | 1 NOT NAMED | 33.3 | 72.7 | 80 | 0 |
| 1944 | 7 18 0  | 1 NOT NAMED | 33.9 | 71.5 | 70 | 0 |
| 1944 | 7 18 6  | 1 NOT NAMED | 34.5 | 70.3 | 70 | 0 |
| 1944 | 7 18 12 | 1 NOT NAMED | 35.1 | 69.2 | 65 | 0 |
| 1944 | 7 18 18 | 1 NOT NAMED | 36.0 | 67.6 | 60 | 0 |
| 1944 | 7 19 0  | 1 NOT NAMED | 37.2 | 65.1 | 55 | 0 |
| 1944 | 7 19 6  | 1 NOT NAMED | 38.6 | 62.0 | 55 | 0 |
| 1944 | 7 19 12 | 1 NOT NAMED | 40.2 | 58.2 | 50 | 0 |
| 1944 | 7 19 18 | 1 NOT NAMED | 42.1 | 54.0 | 50 | 0 |
| 1944 | 7 20 0  | 1 NOT NAMED | 44.2 | 49.8 | 45 | 0 |
| 1944 | 7 24 6  | 2 NOT NAMED | 11.4 | 56.1 | 35 | 0 |
| 1944 | 7 24 12 | 2 NOT NAMED | 11.7 | 58.4 | 40 | 0 |
| 1944 | 7 24 18 | 2 NOT NAMED | 12.3 | 61.0 | 45 | 0 |
| 1944 | 7 25 0  | 2 NOT NAMED | 13.0 | 63.0 | 50 | 0 |
| 1944 | 7 25 6  | 2 NOT NAMED | 14.1 | 64.3 | 55 | 0 |
| 1944 | 7 25 12 | 2 NOT NAMED | 15.1 | 65.6 | 55 | 0 |
| 1944 | 7 25 18 | 2 NOT NAMED | 15.8 | 67.1 | 55 | 0 |
| 1944 | 7 26 0  | 2 NOT NAMED | 16.2 | 68.6 | 55 | 0 |
| 1944 | 7 26 6  | 2 NOT NAMED | 16.3 | 70.2 | 55 | 0 |
| 1944 | 7 26 12 | 2 NOT NAMED | 16.2 | 72.1 | 55 | 0 |
| 1944 | 7 26 18 | 2 NOT NAMED | 16.1 | 74.4 | 50 | 0 |
| 1944 | 7 27 0  | 2 NOT NAMED | 16.1 | 76.8 | 50 | 0 |
| 1944 | 7 27 6  | 2 NOT NAMED | 16.5 | 79.1 | 45 | 0 |
| 1944 | 7 27 12 | 2 NOT NAMED | 16.9 | 81.2 | 45 | 0 |
| 1944 | 7 27 18 | 2 NOT NAMED | 16.9 | 82.2 | 40 | 0 |
| 1944 | 7 28 0  | 2 NOT NAMED | 17.0 | 83.0 | 35 | 0 |
| 1944 | 7 28 6  | 2 NOT NAMED | 17.1 | 84.4 | 30 | 0 |
| 1944 | 7 28 12 | 2 NOT NAMED | 17.2 | 85.8 | 25 | 0 |
| 1944 | 7 28 18 | 2 NOT NAMED | 16.9 | 87.2 | 25 | 0 |
| 1944 | 7 30 18 | 3 NOT NAMED | 22.7 | 70.0 | 40 | 0 |
| 1944 | 7 31 0  | 3 NOT NAMED | 23.7 | 72.5 | 50 | 0 |
| 1944 | 7 31 6  | 3 NOT NAMED | 24.6 | 73.7 | 55 | 0 |
| 1944 | 7 31 12 | 3 NOT NAMED | 25.6 | 74.9 | 65 | 0 |
| 1944 | 7 31 18 | 3 NOT NAMED | 26.9 | 76.7 | 75 | 0 |
| 1944 | 8 1 0   | 3 NOT NAMED | 28.3 | 77.1 | 75 | 0 |

|      |   |    |    |             |      |      |     |     |
|------|---|----|----|-------------|------|------|-----|-----|
| 1944 | 8 | 1  | 6  | 3 NOT NAMED | 29.6 | 77.9 | 75  | 0   |
| 1944 | 8 | 1  | 12 | 3 NOT NAMED | 31.0 | 78.1 | 80  | 0   |
| 1944 | 8 | 1  | 18 | 3 NOT NAMED | 32.6 | 78.2 | 80  | 990 |
| 1944 | 8 | 2  | 0  | 3 NOT NAMED | 34.2 | 78.3 | 60  | 0   |
| 1944 | 8 | 2  | 6  | 3 NOT NAMED | 35.7 | 78.2 | 55  | 0   |
| 1944 | 8 | 2  | 12 | 3 NOT NAMED | 36.9 | 78.0 | 45  | 0   |
| 1944 | 8 | 2  | 18 | 3 NOT NAMED | 37.8 | 77.4 | 40  | 0   |
| 1944 | 8 | 3  | 0  | 3 NOT NAMED | 38.5 | 76.2 | 35  | 0   |
| 1944 | 8 | 3  | 6  | 3 NOT NAMED | 39.2 | 74.5 | 35  | 0   |
| 1944 | 8 | 3  | 12 | 3 NOT NAMED | 39.8 | 72.8 | 35  | 0   |
| 1944 | 8 | 3  | 18 | 3 NOT NAMED | 40.3 | 71.0 | 35  | 0   |
| 1944 | 8 | 4  | 0  | 3 NOT NAMED | 40.8 | 69.4 | 35  | 0   |
| 1944 | 8 | 4  | 6  | 3 NOT NAMED | 41.3 | 67.9 | 35  | 0   |
| 1944 | 8 | 4  | 12 | 3 NOT NAMED | 41.9 | 66.5 | 30  | 0   |
| 1944 | 8 | 4  | 18 | 3 NOT NAMED | 42.3 | 65.4 | 30  | 0   |
| 1944 | 8 | 16 | 18 | 4 NOT NAMED | 12.3 | 57.0 | 40  | 0   |
| 1944 | 8 | 17 | 0  | 4 NOT NAMED | 12.5 | 58.7 | 45  | 0   |
| 1944 | 8 | 17 | 6  | 4 NOT NAMED | 12.7 | 59.8 | 45  | 0   |
| 1944 | 8 | 17 | 12 | 4 NOT NAMED | 12.9 | 60.8 | 50  | 0   |
| 1944 | 8 | 17 | 18 | 4 NOT NAMED | 13.2 | 62.2 | 55  | 0   |
| 1944 | 8 | 18 | 0  | 4 NOT NAMED | 13.6 | 63.8 | 60  | 0   |
| 1944 | 8 | 18 | 6  | 4 NOT NAMED | 14.2 | 65.2 | 65  | 0   |
| 1944 | 8 | 18 | 12 | 4 NOT NAMED | 14.7 | 66.6 | 75  | 973 |
| 1944 | 8 | 18 | 18 | 4 NOT NAMED | 15.2 | 68.0 | 80  | 0   |
| 1944 | 8 | 19 | 0  | 4 NOT NAMED | 15.6 | 69.3 | 90  | 0   |
| 1944 | 8 | 19 | 6  | 4 NOT NAMED | 16.0 | 70.2 | 95  | 0   |
| 1944 | 8 | 19 | 12 | 4 NOT NAMED | 16.2 | 70.9 | 100 | 0   |
| 1944 | 8 | 19 | 18 | 4 NOT NAMED | 16.6 | 72.2 | 105 | 0   |
| 1944 | 8 | 20 | 0  | 4 NOT NAMED | 17.0 | 73.3 | 105 | 0   |
| 1944 | 8 | 20 | 6  | 4 NOT NAMED | 17.4 | 74.4 | 105 | 0   |
| 1944 | 8 | 20 | 12 | 4 NOT NAMED | 17.8 | 75.6 | 105 | 0   |
| 1944 | 8 | 20 | 18 | 4 NOT NAMED | 18.1 | 77.1 | 105 | 0   |
| 1944 | 8 | 21 | 0  | 4 NOT NAMED | 18.4 | 78.5 | 70  | 0   |
| 1944 | 8 | 21 | 6  | 4 NOT NAMED | 18.6 | 79.8 | 70  | 0   |
| 1944 | 8 | 21 | 12 | 4 NOT NAMED | 18.8 | 81.1 | 75  | 0   |
| 1944 | 8 | 21 | 18 | 4 NOT NAMED | 19.1 | 82.7 | 75  | 0   |
| 1944 | 8 | 22 | 0  | 4 NOT NAMED | 19.4 | 84.3 | 80  | 0   |
| 1944 | 8 | 22 | 6  | 4 NOT NAMED | 19.9 | 85.9 | 80  | 0   |
| 1944 | 8 | 22 | 12 | 4 NOT NAMED | 20.4 | 87.5 | 80  | 0   |
| 1944 | 8 | 22 | 18 | 4 NOT NAMED | 20.6 | 88.5 | 65  | 0   |
| 1944 | 8 | 23 | 0  | 4 NOT NAMED | 20.8 | 89.5 | 55  | 0   |
| 1944 | 8 | 23 | 6  | 4 NOT NAMED | 20.9 | 91.1 | 50  | 0   |
| 1944 | 8 | 23 | 12 | 4 NOT NAMED | 20.9 | 92.8 | 45  | 0   |
| 1944 | 8 | 23 | 18 | 4 NOT NAMED | 20.9 | 94.2 | 45  | 0   |



|      |         |   |             |      |      |     |     |
|------|---------|---|-------------|------|------|-----|-----|
| 1944 | 8 24    | 0 | 4 NOT NAMED | 20.9 | 95.3 | 40  | 0   |
| 1944 | 8 24    | 6 | 4 NOT NAMED | 20.8 | 97.1 | 35  | 0   |
| 1944 | 8 19 18 | 5 | 5 NOT NAMED | 22.8 | 87.7 | 35  | 0   |
| 1944 | 8 20    | 0 | 5 NOT NAMED | 22.8 | 89.0 | 35  | 0   |
| 1944 | 8 20    | 6 | 5 NOT NAMED | 22.9 | 89.5 | 40  | 0   |
| 1944 | 8 20 12 | 5 | 5 NOT NAMED | 23.0 | 90.0 | 40  | 0   |
| 1944 | 8 20 18 | 5 | 5 NOT NAMED | 23.0 | 90.6 | 45  | 0   |
| 1944 | 8 21    | 0 | 5 NOT NAMED | 23.1 | 91.4 | 50  | 0   |
| 1944 | 8 21    | 6 | 5 NOT NAMED | 23.3 | 92.6 | 50  | 0   |
| 1944 | 8 21 12 | 5 | 5 NOT NAMED | 23.5 | 93.8 | 50  | 0   |
| 1944 | 8 21 18 | 5 | 5 NOT NAMED | 23.8 | 94.6 | 50  | 0   |
| 1944 | 8 22    | 0 | 5 NOT NAMED | 24.0 | 95.4 | 50  | 0   |
| 1944 | 8 22    | 6 | 5 NOT NAMED | 24.3 | 96.4 | 50  | 0   |
| 1944 | 8 22 12 | 5 | 5 NOT NAMED | 24.7 | 97.3 | 45  | 0   |
| 1944 | 8 22 18 | 5 | 5 NOT NAMED | 25.0 | 98.2 | 45  | 0   |
| 1944 | 8 23    | 0 | 5 NOT NAMED | 25.3 | 98.9 | 35  | 0   |
| 1944 | 8 23    | 6 | 5 NOT NAMED | 25.6 | 99.8 | 25  | 0   |
| 1944 | 9 9     | 0 | 6 NOT NAMED | 22.3 | 93.8 | 35  | 0   |
| 1944 | 9 9     | 6 | 6 NOT NAMED | 23.9 | 94.0 | 40  | 0   |
| 1944 | 9 9 12  | 6 | 6 NOT NAMED | 25.4 | 94.2 | 45  | 0   |
| 1944 | 9 9 18  | 6 | 6 NOT NAMED | 26.7 | 94.1 | 45  | 0   |
| 1944 | 9 10    | 0 | 6 NOT NAMED | 27.7 | 93.3 | 45  | 0   |
| 1944 | 9 10    | 6 | 6 NOT NAMED | 28.3 | 92.1 | 40  | 0   |
| 1944 | 9 10 12 | 6 | 6 NOT NAMED | 28.9 | 90.8 | 40  | 0   |
| 1944 | 9 10 18 | 6 | 6 NOT NAMED | 30.0 | 89.6 | 35  | 0   |
| 1944 | 9 11    | 0 | 6 NOT NAMED | 31.5 | 88.5 | 30  | 0   |
| 1944 | 9 9     | 6 | 7 NOT NAMED | 20.8 | 58.0 | 65  | 0   |
| 1944 | 9 9 12  | 7 | 7 NOT NAMED | 21.2 | 59.7 | 70  | 0   |
| 1944 | 9 9 18  | 7 | 7 NOT NAMED | 21.6 | 61.0 | 70  | 0   |
| 1944 | 9 10    | 0 | 7 NOT NAMED | 22.0 | 62.3 | 75  | 0   |
| 1944 | 9 10    | 6 | 7 NOT NAMED | 22.5 | 63.6 | 75  | 0   |
| 1944 | 9 10 12 | 7 | 7 NOT NAMED | 23.0 | 65.0 | 75  | 0   |
| 1944 | 9 10 18 | 7 | 7 NOT NAMED | 23.4 | 66.3 | 80  | 0   |
| 1944 | 9 11    | 0 | 7 NOT NAMED | 23.9 | 67.4 | 85  | 0   |
| 1944 | 9 11    | 6 | 7 NOT NAMED | 24.2 | 68.1 | 90  | 0   |
| 1944 | 9 11 12 | 7 | 7 NOT NAMED | 24.5 | 68.7 | 90  | 0   |
| 1944 | 9 11 18 | 7 | 7 NOT NAMED | 24.7 | 69.2 | 95  | 0   |
| 1944 | 9 12    | 0 | 7 NOT NAMED | 24.9 | 69.7 | 105 | 0   |
| 1944 | 9 12    | 6 | 7 NOT NAMED | 25.2 | 70.3 | 110 | 0   |
| 1944 | 9 12 12 | 7 | 7 NOT NAMED | 25.6 | 71.1 | 115 | 943 |
| 1944 | 9 12 18 | 7 | 7 NOT NAMED | 26.3 | 72.3 | 120 | 0   |
| 1944 | 9 13    | 0 | 7 NOT NAMED | 27.1 | 73.5 | 120 | 0   |
| 1944 | 9 13    | 6 | 7 NOT NAMED | 27.8 | 74.2 | 115 | 0   |
| 1944 | 9 13 12 | 7 | 7 NOT NAMED | 28.5 | 74.8 | 110 | 0   |

|      |         |             |      |      |     |     |
|------|---------|-------------|------|------|-----|-----|
| 1944 | 9 13 18 | 7 NOT NAMED | 29.7 | 75.5 | 105 | 0   |
| 1944 | 9 14 0  | 7 NOT NAMED | 31.2 | 76.0 | 100 | 0   |
| 1944 | 9 14 6  | 7 NOT NAMED | 32.7 | 76.1 | 95  | 0   |
| 1944 | 9 14 12 | 7 NOT NAMED | 34.4 | 75.7 | 90  | 0   |
| 1944 | 9 14 18 | 7 NOT NAMED | 37.1 | 74.7 | 85  | 0   |
| 1944 | 9 15 0  | 7 NOT NAMED | 39.9 | 73.2 | 75  | 0   |
| 1944 | 9 15 6  | 7 NOT NAMED | 42.1 | 71.5 | 65  | 966 |
| 1944 | 9 15 12 | 7 NOT NAMED | 44.2 | 68.5 | 35  | 0   |
| 1944 | 9 15 18 | 7 NOT NAMED | 46.0 | 63.7 | 35  | 982 |
| 1944 | 9 16 0  | 7 NOT NAMED | 47.8 | 58.2 | 30  | 0   |
| 1944 | 9 16 6  | 7 NOT NAMED | 49.9 | 52.6 | 30  | 0   |
| 1944 | 9 16 12 | 7 NOT NAMED | 52.0 | 47.0 | 30  | 0   |
| 1944 | 9 19 6  | 8 NOT NAMED | 19.3 | 83.8 | 60  | 0   |
| 1944 | 9 19 12 | 8 NOT NAMED | 20.0 | 84.2 | 65  | 0   |
| 1944 | 9 19 18 | 8 NOT NAMED | 20.6 | 84.9 | 70  | 0   |
| 1944 | 9 20 0  | 8 NOT NAMED | 20.9 | 85.6 | 70  | 0   |
| 1944 | 9 20 6  | 8 NOT NAMED | 21.0 | 86.3 | 70  | 0   |
| 1944 | 9 20 12 | 8 NOT NAMED | 21.1 | 87.2 | 70  | 0   |
| 1944 | 9 20 18 | 8 NOT NAMED | 20.9 | 88.3 | 70  | 0   |
| 1944 | 9 21 0  | 8 NOT NAMED | 20.5 | 89.5 | 65  | 0   |
| 1944 | 9 21 6  | 8 NOT NAMED | 20.0 | 90.9 | 70  | 0   |
| 1944 | 9 21 12 | 8 NOT NAMED | 19.8 | 92.2 | 70  | 0   |
| 1944 | 9 21 18 | 8 NOT NAMED | 19.1 | 93.9 | 70  | 0   |
| 1944 | 9 22 0  | 8 NOT NAMED | 17.9 | 94.7 | 60  | 0   |
| 1944 | 9 22 6  | 8 NOT NAMED | 16.6 | 94.4 | 35  | 0   |
| 1944 | 9 22 12 | 8 NOT NAMED | 15.1 | 94.0 | 20  | 0   |
| 1944 | 9 21 12 | 9 NOT NAMED | 17.1 | 41.5 | 35  | 0   |
| 1944 | 9 21 18 | 9 NOT NAMED | 17.2 | 43.5 | 35  | 0   |
| 1944 | 9 22 0  | 9 NOT NAMED | 17.4 | 45.6 | 35  | 0   |
| 1944 | 9 22 6  | 9 NOT NAMED | 17.7 | 47.7 | 35  | 0   |
| 1944 | 9 22 12 | 9 NOT NAMED | 18.2 | 49.7 | 40  | 0   |
| 1944 | 9 22 18 | 9 NOT NAMED | 19.0 | 51.4 | 40  | 0   |
| 1944 | 9 23 0  | 9 NOT NAMED | 19.8 | 52.7 | 45  | 0   |
| 1944 | 9 23 6  | 9 NOT NAMED | 21.3 | 54.1 | 45  | 0   |
| 1944 | 9 23 12 | 9 NOT NAMED | 23.0 | 55.1 | 50  | 0   |
| 1944 | 9 23 18 | 9 NOT NAMED | 24.4 | 55.7 | 55  | 0   |
| 1944 | 9 24 0  | 9 NOT NAMED | 25.8 | 55.9 | 55  | 0   |
| 1944 | 9 24 6  | 9 NOT NAMED | 27.4 | 55.9 | 60  | 0   |
| 1944 | 9 24 12 | 9 NOT NAMED | 29.2 | 55.8 | 65  | 0   |
| 1944 | 9 24 18 | 9 NOT NAMED | 31.1 | 55.5 | 70  | 0   |
| 1944 | 9 25 0  | 9 NOT NAMED | 33.2 | 55.0 | 75  | 0   |
| 1944 | 9 25 6  | 9 NOT NAMED | 35.6 | 54.1 | 80  | 0   |
| 1944 | 9 25 12 | 9 NOT NAMED | 38.0 | 53.2 | 85  | 0   |
| 1944 | 9 25 18 | 9 NOT NAMED | 39.5 | 52.6 | 85  | 0   |

|      |    |    |    |              |      |      |     |   |
|------|----|----|----|--------------|------|------|-----|---|
| 1944 | 9  | 26 | 0  | 9 NOT NAMED  | 40.9 | 52.2 | 85  | 0 |
| 1944 | 9  | 26 | 6  | 9 NOT NAMED  | 42.2 | 51.6 | 80  | 0 |
| 1944 | 9  | 26 | 12 | 9 NOT NAMED  | 43.2 | 51.2 | 75  | 0 |
| 1944 | 9  | 26 | 18 | 9 NOT NAMED  | 45.9 | 49.8 | 70  | 0 |
| 1944 | 9  | 27 | 0  | 9 NOT NAMED  | 48.7 | 47.9 | 70  | 0 |
| 1944 | 9  | 27 | 6  | 9 NOT NAMED  | 50.0 | 46.5 | 65  | 0 |
| 1944 | 9  | 27 | 12 | 9 NOT NAMED  | 52.3 | 43.9 | 60  | 0 |
| 1944 | 9  | 27 | 18 | 9 NOT NAMED  | 55.2 | 41.1 | 55  | 0 |
| 1944 | 9  | 28 | 0  | 9 NOT NAMED  | 57.8 | 34.7 | 55  | 0 |
| 1944 | 9  | 28 | 6  | 9 NOT NAMED  | 59.6 | 28.5 | 50  | 0 |
| 1944 | 9  | 28 | 12 | 9 NOT NAMED  | 61.4 | 22.4 | 45  | 0 |
| 1944 | 10 | 1  | 6  | 10 NOT NAMED | 15.0 | 57.0 | 40  | 0 |
| 1944 | 10 | 1  | 12 | 10 NOT NAMED | 15.8 | 58.4 | 40  | 0 |
| 1944 | 10 | 1  | 18 | 10 NOT NAMED | 16.6 | 58.8 | 40  | 0 |
| 1944 | 10 | 2  | 0  | 10 NOT NAMED | 17.4 | 59.0 | 40  | 0 |
| 1944 | 10 | 2  | 6  | 10 NOT NAMED | 18.2 | 59.1 | 40  | 0 |
| 1944 | 10 | 2  | 12 | 10 NOT NAMED | 18.9 | 59.1 | 40  | 0 |
| 1944 | 10 | 2  | 18 | 10 NOT NAMED | 19.5 | 59.2 | 35  | 0 |
| 1944 | 10 | 3  | 0  | 10 NOT NAMED | 20.1 | 59.2 | 35  | 0 |
| 1944 | 10 | 3  | 6  | 10 NOT NAMED | 20.5 | 59.1 | 30  | 0 |
| 1944 | 10 | 12 | 18 | 11 NOT NAMED | 15.0 | 80.3 | 35  | 0 |
| 1944 | 10 | 13 | 0  | 11 NOT NAMED | 16.1 | 80.8 | 65  | 0 |
| 1944 | 10 | 13 | 6  | 11 NOT NAMED | 16.8 | 80.9 | 65  | 0 |
| 1944 | 10 | 13 | 12 | 11 NOT NAMED | 17.4 | 80.9 | 70  | 0 |
| 1944 | 10 | 13 | 18 | 11 NOT NAMED | 17.7 | 80.9 | 70  | 0 |
| 1944 | 10 | 14 | 0  | 11 NOT NAMED | 17.9 | 80.8 | 70  | 0 |
| 1944 | 10 | 14 | 6  | 11 NOT NAMED | 18.2 | 80.7 | 70  | 0 |
| 1944 | 10 | 14 | 12 | 11 NOT NAMED | 18.5 | 80.6 | 75  | 0 |
| 1944 | 10 | 14 | 18 | 11 NOT NAMED | 18.8 | 80.6 | 75  | 0 |
| 1944 | 10 | 15 | 0  | 11 NOT NAMED | 19.0 | 80.5 | 75  | 0 |
| 1944 | 10 | 15 | 6  | 11 NOT NAMED | 19.2 | 80.5 | 75  | 0 |
| 1944 | 10 | 15 | 12 | 11 NOT NAMED | 19.3 | 80.8 | 75  | 0 |
| 1944 | 10 | 15 | 18 | 11 NOT NAMED | 19.2 | 81.3 | 80  | 0 |
| 1944 | 10 | 16 | 0  | 11 NOT NAMED | 19.2 | 81.7 | 80  | 0 |
| 1944 | 10 | 16 | 6  | 11 NOT NAMED | 19.3 | 82.1 | 80  | 0 |
| 1944 | 10 | 16 | 12 | 11 NOT NAMED | 19.4 | 82.4 | 85  | 0 |
| 1944 | 10 | 16 | 18 | 11 NOT NAMED | 19.6 | 82.7 | 85  | 0 |
| 1944 | 10 | 17 | 0  | 11 NOT NAMED | 19.9 | 82.9 | 90  | 0 |
| 1944 | 10 | 17 | 6  | 11 NOT NAMED | 20.2 | 82.9 | 95  | 0 |
| 1944 | 10 | 17 | 12 | 11 NOT NAMED | 20.6 | 82.9 | 95  | 0 |
| 1944 | 10 | 17 | 18 | 11 NOT NAMED | 21.2 | 82.9 | 100 | 0 |
| 1944 | 10 | 18 | 0  | 11 NOT NAMED | 21.9 | 82.9 | 105 | 0 |
| 1944 | 10 | 18 | 6  | 11 NOT NAMED | 22.5 | 82.9 | 105 | 0 |
| 1944 | 10 | 18 | 12 | 11 NOT NAMED | 23.1 | 83.0 | 100 | 0 |

|      |    |    |    |    |           |      |      |     |     |
|------|----|----|----|----|-----------|------|------|-----|-----|
| 1944 | 10 | 18 | 18 | 11 | NOT NAMED | 24.0 | 82.9 | 105 | 0   |
| 1944 | 10 | 19 | 0  | 11 | NOT NAMED | 25.3 | 82.7 | 105 | 0   |
| 1944 | 10 | 19 | 6  | 11 | NOT NAMED | 26.8 | 82.4 | 65  | 0   |
| 1944 | 10 | 19 | 12 | 11 | NOT NAMED | 28.4 | 82.1 | 65  | 968 |
| 1944 | 10 | 19 | 18 | 11 | NOT NAMED | 29.8 | 81.7 | 60  | 978 |
| 1944 | 10 | 20 | 0  | 11 | NOT NAMED | 31.2 | 81.2 | 50  | 983 |
| 1944 | 10 | 20 | 6  | 11 | NOT NAMED | 32.3 | 80.8 | 45  | 987 |
| 1944 | 10 | 20 | 12 | 11 | NOT NAMED | 33.5 | 80.1 | 40  | 992 |
| 1944 | 10 | 20 | 18 | 11 | NOT NAMED | 35.2 | 78.5 | 35  | 996 |
| 1944 | 10 | 21 | 0  | 11 | NOT NAMED | 36.9 | 76.6 | 35  | 998 |
| 1944 | 10 | 21 | 6  | 11 | NOT NAMED | 38.1 | 75.0 | 40  | 997 |
| 1944 | 10 | 21 | 12 | 11 | NOT NAMED | 39.4 | 73.3 | 45  | 0   |
| 1944 | 10 | 21 | 18 | 11 | NOT NAMED | 41.1 | 70.8 | 45  | 0   |
| 1944 | 10 | 22 | 0  | 11 | NOT NAMED | 42.9 | 67.4 | 45  | 0   |
| 1944 | 10 | 22 | 6  | 11 | NOT NAMED | 44.9 | 63.7 | 45  | 0   |
| 1944 | 10 | 22 | 12 | 11 | NOT NAMED | 47.0 | 60.2 | 40  | 0   |
| 1944 | 10 | 22 | 18 | 11 | NOT NAMED | 49.2 | 57.1 | 40  | 0   |
| 1944 | 10 | 23 | 0  | 11 | NOT NAMED | 52.2 | 54.2 | 40  | 0   |
| 1944 | 10 | 23 | 6  | 11 | NOT NAMED | 56.1 | 51.5 | 35  | 0   |
| 1944 | 10 | 23 | 12 | 11 | NOT NAMED | 60.0 | 48.8 | 35  | 0   |
| 1945 | 6  | 20 | 12 | 1  | NOT NAMED | 17.5 | 85.7 | 35  | 0   |
| 1945 | 6  | 20 | 18 | 1  | NOT NAMED | 18.3 | 85.9 | 35  | 0   |
| 1945 | 6  | 21 | 0  | 1  | NOT NAMED | 19.2 | 86.1 | 35  | 0   |
| 1945 | 6  | 21 | 6  | 1  | NOT NAMED | 20.3 | 86.2 | 35  | 0   |
| 1945 | 6  | 21 | 12 | 1  | NOT NAMED | 21.4 | 86.3 | 40  | 0   |
| 1945 | 6  | 21 | 18 | 1  | NOT NAMED | 22.2 | 86.3 | 40  | 0   |
| 1945 | 6  | 22 | 0  | 1  | NOT NAMED | 23.0 | 86.4 | 40  | 0   |
| 1945 | 6  | 22 | 6  | 1  | NOT NAMED | 23.8 | 86.4 | 45  | 0   |
| 1945 | 6  | 22 | 12 | 1  | NOT NAMED | 24.5 | 86.5 | 45  | 0   |
| 1945 | 6  | 22 | 18 | 1  | NOT NAMED | 25.2 | 86.6 | 50  | 0   |
| 1945 | 6  | 23 | 0  | 1  | NOT NAMED | 25.9 | 86.6 | 50  | 0   |
| 1945 | 6  | 23 | 6  | 1  | NOT NAMED | 26.6 | 86.5 | 50  | 0   |
| 1945 | 6  | 23 | 12 | 1  | NOT NAMED | 27.2 | 86.2 | 55  | 0   |
| 1945 | 6  | 23 | 18 | 1  | NOT NAMED | 27.6 | 85.6 | 100 | 0   |
| 1945 | 6  | 24 | 0  | 1  | NOT NAMED | 28.0 | 84.6 | 95  | 0   |
| 1945 | 6  | 24 | 6  | 1  | NOT NAMED | 28.5 | 83.5 | 80  | 0   |
| 1945 | 6  | 24 | 12 | 1  | NOT NAMED | 29.0 | 82.4 | 70  | 0   |
| 1945 | 6  | 24 | 18 | 1  | NOT NAMED | 29.8 | 81.3 | 60  | 0   |
| 1945 | 6  | 25 | 0  | 1  | NOT NAMED | 30.7 | 80.1 | 65  | 0   |
| 1945 | 6  | 25 | 6  | 1  | NOT NAMED | 31.7 | 79.1 | 70  | 0   |
| 1945 | 6  | 25 | 12 | 1  | NOT NAMED | 32.8 | 78.1 | 60  | 0   |
| 1945 | 6  | 25 | 18 | 1  | NOT NAMED | 33.5 | 77.5 | 60  | 0   |
| 1945 | 6  | 26 | 0  | 1  | NOT NAMED | 34.3 | 76.8 | 50  | 0   |
| 1945 | 6  | 26 | 6  | 1  | NOT NAMED | 35.8 | 75.3 | 45  | 0   |

|      |   |    |    |   |           |      |      |    |   |
|------|---|----|----|---|-----------|------|------|----|---|
| 1945 | 6 | 26 | 12 | 1 | NOT NAMED | 37.3 | 73.8 | 50 | 0 |
| 1945 | 6 | 26 | 18 | 1 | NOT NAMED | 38.3 | 72.5 | 55 | 0 |
| 1945 | 6 | 27 | 0  | 1 | NOT NAMED | 39.2 | 71.3 | 60 | 0 |
| 1945 | 6 | 27 | 6  | 1 | NOT NAMED | 40.0 | 70.1 | 55 | 0 |
| 1945 | 6 | 27 | 12 | 1 | NOT NAMED | 40.8 | 69.0 | 55 | 0 |
| 1945 | 6 | 27 | 18 | 1 | NOT NAMED | 41.5 | 67.7 | 55 | 0 |
| 1945 | 6 | 28 | 0  | 1 | NOT NAMED | 42.0 | 66.3 | 45 | 0 |
| 1945 | 6 | 28 | 6  | 1 | NOT NAMED | 42.1 | 64.2 | 45 | 0 |
| 1945 | 6 | 28 | 12 | 1 | NOT NAMED | 42.2 | 62.6 | 45 | 0 |
| 1945 | 6 | 28 | 18 | 1 | NOT NAMED | 42.5 | 62.0 | 40 | 0 |
| 1945 | 6 | 29 | 0  | 1 | NOT NAMED | 42.9 | 61.3 | 40 | 0 |
| 1945 | 6 | 29 | 6  | 1 | NOT NAMED | 43.4 | 60.7 | 40 | 0 |
| 1945 | 6 | 29 | 12 | 1 | NOT NAMED | 44.1 | 60.0 | 40 | 0 |
| 1945 | 6 | 29 | 18 | 1 | NOT NAMED | 46.7 | 57.0 | 40 | 0 |
| 1945 | 6 | 30 | 0  | 1 | NOT NAMED | 49.0 | 54.4 | 35 | 0 |
| 1945 | 6 | 30 | 6  | 1 | NOT NAMED | 50.3 | 52.8 | 35 | 0 |
| 1945 | 6 | 30 | 12 | 1 | NOT NAMED | 51.7 | 50.7 | 35 | 0 |
| 1945 | 6 | 30 | 18 | 1 | NOT NAMED | 52.9 | 48.9 | 35 | 0 |
| 1945 | 7 | 1  | 0  | 1 | NOT NAMED | 54.3 | 46.8 | 35 | 0 |
| 1945 | 7 | 1  | 6  | 1 | NOT NAMED | 56.0 | 44.5 | 35 | 0 |
| 1945 | 7 | 1  | 12 | 1 | NOT NAMED | 57.8 | 41.2 | 35 | 0 |
| 1945 | 7 | 19 | 6  | 2 | NOT NAMED | 25.5 | 92.4 | 35 | 0 |
| 1945 | 7 | 19 | 12 | 2 | NOT NAMED | 26.0 | 92.5 | 40 | 0 |
| 1945 | 7 | 19 | 18 | 2 | NOT NAMED | 26.5 | 92.6 | 40 | 0 |
| 1945 | 7 | 20 | 0  | 2 | NOT NAMED | 27.0 | 92.8 | 45 | 0 |
| 1945 | 7 | 20 | 6  | 2 | NOT NAMED | 27.5 | 93.1 | 45 | 0 |
| 1945 | 7 | 20 | 12 | 2 | NOT NAMED | 27.9 | 93.4 | 45 | 0 |
| 1945 | 7 | 20 | 18 | 2 | NOT NAMED | 28.2 | 93.9 | 45 | 0 |
| 1945 | 7 | 21 | 0  | 2 | NOT NAMED | 28.2 | 94.8 | 45 | 0 |
| 1945 | 7 | 21 | 6  | 2 | NOT NAMED | 28.1 | 95.1 | 40 | 0 |
| 1945 | 7 | 21 | 12 | 2 | NOT NAMED | 27.8 | 95.7 | 40 | 0 |
| 1945 | 7 | 21 | 18 | 2 | NOT NAMED | 27.4 | 96.5 | 35 | 0 |
| 1945 | 7 | 22 | 0  | 2 | NOT NAMED | 26.9 | 97.5 | 25 | 0 |
| 1945 | 7 | 22 | 6  | 2 | NOT NAMED | 26.2 | 98.2 | 15 | 0 |
| 1945 | 8 | 1  | 6  | 3 | NOT NAMED | 12.1 | 56.3 | 35 | 0 |
| 1945 | 8 | 1  | 12 | 3 | NOT NAMED | 12.7 | 57.2 | 35 | 0 |
| 1945 | 8 | 1  | 18 | 3 | NOT NAMED | 13.1 | 57.7 | 35 | 0 |
| 1945 | 8 | 2  | 0  | 3 | NOT NAMED | 13.6 | 58.3 | 40 | 0 |
| 1945 | 8 | 2  | 6  | 3 | NOT NAMED | 14.1 | 58.9 | 40 | 0 |
| 1945 | 8 | 2  | 12 | 3 | NOT NAMED | 14.5 | 59.7 | 40 | 0 |
| 1945 | 8 | 2  | 18 | 3 | NOT NAMED | 15.0 | 60.7 | 45 | 0 |
| 1945 | 8 | 3  | 0  | 3 | NOT NAMED | 15.6 | 62.0 | 45 | 0 |
| 1945 | 8 | 3  | 6  | 3 | NOT NAMED | 16.1 | 63.3 | 50 | 0 |
| 1945 | 8 | 3  | 12 | 3 | NOT NAMED | 16.6 | 64.7 | 50 | 0 |

|      |   |    |    |             |      |      |     |      |
|------|---|----|----|-------------|------|------|-----|------|
| 1945 | 8 | 3  | 18 | 3 NOT NAMED | 16.9 | 66.2 | 50  | 0    |
| 1945 | 8 | 4  | 0  | 3 NOT NAMED | 17.2 | 67.5 | 50  | 0    |
| 1945 | 8 | 4  | 6  | 3 NOT NAMED | 17.6 | 68.7 | 45  | 0    |
| 1945 | 8 | 4  | 12 | 3 NOT NAMED | 18.0 | 69.8 | 35  | 0    |
| 1945 | 8 | 4  | 18 | 3 NOT NAMED | 18.4 | 70.9 | 25  | 0    |
| 1945 | 8 | 17 | 18 | 4 NOT NAMED | 17.4 | 55.3 | 35  | 0    |
| 1945 | 8 | 18 | 0  | 4 NOT NAMED | 17.7 | 56.4 | 45  | 0    |
| 1945 | 8 | 18 | 6  | 4 NOT NAMED | 17.9 | 57.5 | 50  | 0    |
| 1945 | 8 | 18 | 12 | 4 NOT NAMED | 18.2 | 58.5 | 55  | 0    |
| 1945 | 8 | 18 | 18 | 4 NOT NAMED | 18.5 | 59.6 | 60  | 0    |
| 1945 | 8 | 19 | 0  | 4 NOT NAMED | 18.9 | 60.8 | 60  | 0    |
| 1945 | 8 | 19 | 6  | 4 NOT NAMED | 19.4 | 62.4 | 55  | 0    |
| 1945 | 8 | 19 | 12 | 4 NOT NAMED | 20.0 | 64.2 | 50  | 0    |
| 1945 | 8 | 19 | 18 | 4 NOT NAMED | 20.5 | 65.7 | 50  | 0    |
| 1945 | 8 | 20 | 0  | 4 NOT NAMED | 21.0 | 67.2 | 45  | 0    |
| 1945 | 8 | 20 | 6  | 4 NOT NAMED | 21.5 | 68.8 | 40  | 0    |
| 1945 | 8 | 20 | 12 | 4 NOT NAMED | 21.9 | 70.5 | 40  | 0    |
| 1945 | 8 | 20 | 18 | 4 NOT NAMED | 22.5 | 72.3 | 35  | 0    |
| 1945 | 8 | 21 | 0  | 4 NOT NAMED | 23.1 | 74.3 | 30  | 0    |
| 1945 | 8 | 21 | 6  | 4 NOT NAMED | 23.6 | 76.0 | 25  | 0    |
| 1945 | 8 | 24 | 6  | 5 NOT NAMED | 19.4 | 94.0 | 60  | 0    |
| 1945 | 8 | 24 | 12 | 5 NOT NAMED | 20.9 | 94.7 | 60  | 0    |
| 1945 | 8 | 24 | 18 | 5 NOT NAMED | 21.6 | 95.2 | 65  | 0    |
| 1945 | 8 | 25 | 0  | 5 NOT NAMED | 22.4 | 95.7 | 70  | 0    |
| 1945 | 8 | 25 | 6  | 5 NOT NAMED | 23.4 | 96.1 | 75  | 0    |
| 1945 | 8 | 25 | 12 | 5 NOT NAMED | 24.3 | 96.4 | 80  | 0    |
| 1945 | 8 | 25 | 18 | 5 NOT NAMED | 24.9 | 96.6 | 85  | 0    |
| 1945 | 8 | 26 | 0  | 5 NOT NAMED | 25.4 | 96.7 | 90  | 0    |
| 1945 | 8 | 26 | 6  | 5 NOT NAMED | 26.0 | 96.8 | 95  | 0    |
| 1945 | 8 | 26 | 12 | 5 NOT NAMED | 26.6 | 96.8 | 100 | 0    |
| 1945 | 8 | 26 | 18 | 5 NOT NAMED | 27.0 | 96.8 | 105 | 0    |
| 1945 | 8 | 27 | 0  | 5 NOT NAMED | 27.3 | 96.8 | 110 | 0    |
| 1945 | 8 | 27 | 6  | 5 NOT NAMED | 27.8 | 96.5 | 115 | 0    |
| 1945 | 8 | 27 | 12 | 5 NOT NAMED | 28.2 | 96.2 | 115 | 963  |
| 1945 | 8 | 27 | 18 | 5 NOT NAMED | 28.6 | 96.1 | 120 | 966  |
| 1945 | 8 | 28 | 0  | 5 NOT NAMED | 29.1 | 96.0 | 120 | 968  |
| 1945 | 8 | 28 | 6  | 5 NOT NAMED | 29.5 | 96.0 | 65  | 980  |
| 1945 | 8 | 28 | 12 | 5 NOT NAMED | 29.9 | 96.1 | 50  | 987  |
| 1945 | 8 | 28 | 18 | 5 NOT NAMED | 30.6 | 96.4 | 40  | 993  |
| 1945 | 8 | 29 | 0  | 5 NOT NAMED | 31.0 | 96.6 | 35  | 998  |
| 1945 | 8 | 29 | 6  | 5 NOT NAMED | 31.5 | 97.1 | 30  | 1002 |
| 1945 | 8 | 29 | 12 | 5 NOT NAMED | 31.8 | 97.5 | 25  | 1006 |
| 1945 | 8 | 29 | 18 | 5 NOT NAMED | 32.1 | 97.9 | 20  | 1009 |
| 1945 | 8 | 29 | 6  | 6 NOT NAMED | 13.0 | 82.6 | 35  | 0    |

|      |         |             |      |      |    |     |
|------|---------|-------------|------|------|----|-----|
| 1945 | 8 29 12 | 6 NOT NAMED | 14.2 | 81.8 | 35 | 0   |
| 1945 | 8 29 18 | 6 NOT NAMED | 14.8 | 81.5 | 40 | 0   |
| 1945 | 8 30 0  | 6 NOT NAMED | 15.5 | 81.3 | 40 | 0   |
| 1945 | 8 30 6  | 6 NOT NAMED | 16.4 | 81.5 | 45 | 0   |
| 1945 | 8 30 12 | 6 NOT NAMED | 17.2 | 82.2 | 50 | 0   |
| 1945 | 8 30 18 | 6 NOT NAMED | 17.6 | 83.2 | 50 | 0   |
| 1945 | 8 31 0  | 6 NOT NAMED | 17.7 | 84.4 | 50 | 0   |
| 1945 | 8 31 6  | 6 NOT NAMED | 17.8 | 85.9 | 45 | 0   |
| 1945 | 8 31 12 | 6 NOT NAMED | 17.7 | 87.3 | 40 | 0   |
| 1945 | 8 31 18 | 6 NOT NAMED | 17.4 | 88.6 | 35 | 993 |
| 1945 | 9 1 0   | 6 NOT NAMED | 17.2 | 89.4 | 25 | 0   |
| 1945 | 9 1 6   | 6 NOT NAMED | 16.7 | 90.6 | 20 | 0   |
| 1945 | 9 3 18  | 7 NOT NAMED | 20.0 | 84.0 | 35 | 0   |
| 1945 | 9 4 0   | 7 NOT NAMED | 21.6 | 83.3 | 35 | 0   |
| 1945 | 9 4 6   | 7 NOT NAMED | 23.4 | 82.5 | 35 | 0   |
| 1945 | 9 4 12  | 7 NOT NAMED | 24.7 | 82.1 | 35 | 0   |
| 1945 | 9 4 18  | 7 NOT NAMED | 25.7 | 82.1 | 35 | 0   |
| 1945 | 9 5 0   | 7 NOT NAMED | 26.7 | 82.3 | 35 | 0   |
| 1945 | 9 5 6   | 7 NOT NAMED | 27.9 | 83.8 | 35 | 0   |
| 1945 | 9 5 12  | 7 NOT NAMED | 28.7 | 85.4 | 30 | 0   |
| 1945 | 9 5 18  | 7 NOT NAMED | 29.1 | 86.9 | 30 | 0   |
| 1945 | 9 6 0   | 7 NOT NAMED | 29.5 | 88.3 | 30 | 0   |
| 1945 | 9 6 6   | 7 NOT NAMED | 30.3 | 89.6 | 25 | 0   |
| 1945 | 9 6 12  | 7 NOT NAMED | 31.1 | 90.8 | 20 | 0   |
| 1945 | 9 6 18  | 7 NOT NAMED | 31.9 | 91.9 | 15 | 0   |
| 1945 | 9 10 0  | 8 NOT NAMED | 18.3 | 60.3 | 35 | 0   |
| 1945 | 9 10 6  | 8 NOT NAMED | 19.4 | 61.0 | 45 | 0   |
| 1945 | 9 10 12 | 8 NOT NAMED | 20.4 | 61.6 | 50 | 0   |
| 1945 | 9 10 18 | 8 NOT NAMED | 21.9 | 63.2 | 50 | 0   |
| 1945 | 9 11 0  | 8 NOT NAMED | 23.6 | 64.9 | 50 | 0   |
| 1945 | 9 11 6  | 8 NOT NAMED | 24.6 | 65.5 | 50 | 0   |
| 1945 | 9 11 12 | 8 NOT NAMED | 25.8 | 66.1 | 45 | 0   |
| 1945 | 9 11 18 | 8 NOT NAMED | 27.5 | 66.7 | 45 | 0   |
| 1945 | 9 12 0  | 8 NOT NAMED | 29.4 | 67.1 | 40 | 0   |
| 1945 | 9 12 6  | 8 NOT NAMED | 31.3 | 67.1 | 40 | 0   |
| 1945 | 9 12 12 | 8 NOT NAMED | 33.2 | 67.1 | 35 | 0   |
| 1945 | 9 12 18 | 8 NOT NAMED | 35.1 | 66.7 | 30 | 0   |
| 1945 | 9 12 0  | 9 NOT NAMED | 19.0 | 56.6 | 65 | 0   |
| 1945 | 9 12 6  | 9 NOT NAMED | 19.1 | 58.2 | 70 | 0   |
| 1945 | 9 12 12 | 9 NOT NAMED | 19.2 | 59.7 | 75 | 0   |
| 1945 | 9 12 18 | 9 NOT NAMED | 19.2 | 61.5 | 80 | 0   |
| 1945 | 9 13 0  | 9 NOT NAMED | 19.4 | 63.3 | 85 | 0   |
| 1945 | 9 13 6  | 9 NOT NAMED | 19.5 | 64.9 | 95 | 0   |
| 1945 | 9 13 12 | 9 NOT NAMED | 19.9 | 66.5 | 95 | 0   |

|      |    |    |    |              |      |      |     |      |
|------|----|----|----|--------------|------|------|-----|------|
| 1945 | 9  | 13 | 18 | 9 NOT NAMED  | 20.4 | 68.3 | 100 | 0    |
| 1945 | 9  | 14 | 0  | 9 NOT NAMED  | 20.8 | 70.0 | 100 | 0    |
| 1945 | 9  | 14 | 6  | 9 NOT NAMED  | 21.3 | 71.5 | 105 | 977  |
| 1945 | 9  | 14 | 12 | 9 NOT NAMED  | 22.0 | 73.4 | 105 | 0    |
| 1945 | 9  | 14 | 18 | 9 NOT NAMED  | 22.4 | 74.5 | 105 | 0    |
| 1945 | 9  | 15 | 0  | 9 NOT NAMED  | 23.0 | 76.0 | 105 | 0    |
| 1945 | 9  | 15 | 6  | 9 NOT NAMED  | 23.6 | 77.3 | 110 | 0    |
| 1945 | 9  | 15 | 12 | 9 NOT NAMED  | 24.2 | 78.5 | 115 | 0    |
| 1945 | 9  | 15 | 18 | 9 NOT NAMED  | 24.9 | 79.6 | 120 | 0    |
| 1945 | 9  | 16 | 0  | 9 NOT NAMED  | 25.7 | 80.6 | 115 | 951  |
| 1945 | 9  | 16 | 6  | 9 NOT NAMED  | 26.8 | 81.4 | 110 | 963  |
| 1945 | 9  | 16 | 12 | 9 NOT NAMED  | 28.0 | 81.8 | 85  | 974  |
| 1945 | 9  | 16 | 18 | 9 NOT NAMED  | 28.9 | 81.8 | 65  | 982  |
| 1945 | 9  | 17 | 0  | 9 NOT NAMED  | 29.8 | 81.6 | 55  | 987  |
| 1945 | 9  | 17 | 6  | 9 NOT NAMED  | 31.0 | 81.2 | 50  | 990  |
| 1945 | 9  | 17 | 12 | 9 NOT NAMED  | 32.2 | 80.8 | 45  | 991  |
| 1945 | 9  | 17 | 18 | 9 NOT NAMED  | 33.4 | 80.4 | 40  | 996  |
| 1945 | 9  | 18 | 0  | 9 NOT NAMED  | 34.6 | 79.9 | 40  | 1000 |
| 1945 | 9  | 18 | 6  | 9 NOT NAMED  | 35.8 | 79.3 | 35  | 1006 |
| 1945 | 9  | 18 | 12 | 9 NOT NAMED  | 37.0 | 78.5 | 35  | 1012 |
| 1945 | 9  | 18 | 18 | 9 NOT NAMED  | 38.6 | 77.2 | 30  | 0    |
| 1945 | 9  | 19 | 0  | 9 NOT NAMED  | 40.6 | 75.3 | 25  | 0    |
| 1945 | 9  | 19 | 6  | 9 NOT NAMED  | 42.7 | 72.7 | 25  | 0    |
| 1945 | 9  | 19 | 12 | 9 NOT NAMED  | 44.1 | 69.4 | 25  | 0    |
| 1945 | 9  | 19 | 18 | 9 NOT NAMED  | 45.1 | 65.5 | 25  | 0    |
| 1945 | 9  | 20 | 0  | 9 NOT NAMED  | 45.6 | 60.6 | 25  | 0    |
| 1945 | 9  | 20 | 6  | 9 NOT NAMED  | 46.3 | 54.8 | 25  | 0    |
| 1945 | 9  | 20 | 12 | 9 NOT NAMED  | 47.0 | 49.0 | 25  | 0    |
| 1945 | 9  | 20 | 18 | 9 NOT NAMED  | 47.9 | 46.1 | 25  | 0    |
| 1945 | 10 | 2  | 18 | 10 NOT NAMED | 15.3 | 80.3 | 60  | 0    |
| 1945 | 10 | 3  | 0  | 10 NOT NAMED | 16.2 | 82.6 | 65  | 0    |
| 1945 | 10 | 3  | 6  | 10 NOT NAMED | 16.4 | 83.3 | 70  | 0    |
| 1945 | 10 | 3  | 12 | 10 NOT NAMED | 16.5 | 84.2 | 80  | 0    |
| 1945 | 10 | 3  | 18 | 10 NOT NAMED | 16.5 | 85.6 | 85  | 982  |
| 1945 | 10 | 4  | 0  | 10 NOT NAMED | 16.5 | 87.0 | 80  | 0    |
| 1945 | 10 | 4  | 6  | 10 NOT NAMED | 16.4 | 88.3 | 70  | 0    |
| 1945 | 10 | 4  | 12 | 10 NOT NAMED | 16.2 | 89.4 | 60  | 0    |
| 1945 | 10 | 4  | 18 | 10 NOT NAMED | 16.0 | 90.3 | 50  | 0    |
| 1945 | 10 | 5  | 0  | 10 NOT NAMED | 15.8 | 91.2 | 35  | 0    |
| 1945 | 10 | 5  | 6  | 10 NOT NAMED | 15.7 | 92.2 | 25  | 0    |
| 1945 | 10 | 5  | 12 | 10 NOT NAMED | 15.5 | 93.2 | 20  | 0    |
| 1945 | 10 | 5  | 18 | 10 NOT NAMED | 15.4 | 93.7 | 15  | 0    |
| 1945 | 10 | 10 | 12 | 11 NOT NAMED | 13.1 | 77.9 | 30  | 0    |
| 1945 | 10 | 10 | 18 | 11 NOT NAMED | 14.4 | 78.8 | 30  | 0    |



|            |         |               |      |      |    |      |
|------------|---------|---------------|------|------|----|------|
| 1945 10 11 | 0 11    | NOT NAMED     | 15.5 | 79.5 | 35 | 0    |
| 1945 10 11 | 6 11    | NOT NAMED     | 16.7 | 80.0 | 35 | 0    |
| 1945 10 11 | 12 11   | NOT NAMED     | 17.8 | 80.3 | 45 | 0    |
| 1945 10 11 | 18 11   | NOT NAMED     | 18.8 | 80.3 | 55 | 0    |
| 1945 10 12 | 0 11    | NOT NAMED     | 19.6 | 80.2 | 65 | 0    |
| 1945 10 12 | 6 11    | NOT NAMED     | 20.5 | 79.8 | 70 | 0    |
| 1945 10 12 | 12 11   | NOT NAMED     | 21.6 | 79.3 | 85 | 1000 |
| 1945 10 12 | 18 11   | NOT NAMED     | 22.9 | 78.6 | 80 | 0    |
| 1945 10 13 | 0 11    | NOT NAMED     | 24.4 | 77.4 | 65 | 0    |
| 1945 10 13 | 6 11    | NOT NAMED     | 25.8 | 76.0 | 65 | 982  |
| 1945 10 13 | 12 11   | NOT NAMED     | 27.2 | 73.8 | 65 | 0    |
| 1945 10 13 | 18 11   | NOT NAMED     | 28.5 | 71.0 | 65 | 0    |
| 1945 10 14 | 0 11    | NOT NAMED     | 29.9 | 68.0 | 65 | 0    |
| 1945 10 14 | 6 11    | NOT NAMED     | 31.2 | 64.2 | 55 | 0    |
| 1945 10 14 | 12 11   | NOT NAMED     | 32.4 | 60.5 | 40 | 0    |
| 1945 10 14 | 18 11   | NOT NAMED     | 33.5 | 56.7 | 30 | 0    |
| 1945 10 15 | 0 11    | NOT NAMED     | 34.5 | 52.9 | 30 | 0    |
| 1945 10 15 | 6 11    | NOT NAMED     | 35.3 | 49.0 | 30 | 0    |
| 1945 10 15 | 12 11   | NOT NAMED     | 36.0 | 44.9 | 30 | 0    |
| 1945 10 15 | 18 11   | NOT NAMED     | 36.7 | 42.2 | 30 | 0    |
| 1945 10 16 | 0 11    | NOT NAMED     | 37.2 | 40.0 | 30 | 0    |
| 1945 10 16 | 6 11    | NOT NAMED     | 37.8 | 37.7 | 30 | 0    |
| 1945 10 16 | 12 11   | NOT NAMED     | 38.3 | 35.0 | 30 | 0    |
| 1945 10 16 | 18 11   | NOT NAMED     | 39.0 | 32.2 | 30 | 0    |
| 1946       | 6 13 18 | 1 NOT NAMED   | 27.0 | 85.5 | 35 | 0    |
| 1946       | 6 14    | 0 1 NOT NAMED | 27.9 | 86.2 | 35 | 0    |
| 1946       | 6 14    | 6 1 NOT NAMED | 28.3 | 86.8 | 35 | 0    |
| 1946       | 6 14 12 | 1 NOT NAMED   | 28.6 | 87.5 | 35 | 0    |
| 1946       | 6 14 18 | 1 NOT NAMED   | 28.7 | 88.6 | 35 | 0    |
| 1946       | 6 15    | 0 1 NOT NAMED | 28.7 | 89.7 | 35 | 0    |
| 1946       | 6 15    | 6 1 NOT NAMED | 28.8 | 90.5 | 35 | 0    |
| 1946       | 6 15 12 | 1 NOT NAMED   | 28.8 | 91.2 | 35 | 0    |
| 1946       | 6 15 18 | 1 NOT NAMED   | 28.8 | 92.2 | 35 | 0    |
| 1946       | 6 16    | 0 1 NOT NAMED | 29.1 | 93.0 | 35 | 0    |
| 1946       | 6 16    | 6 1 NOT NAMED | 29.6 | 93.5 | 35 | 0    |
| 1946       | 6 16 12 | 1 NOT NAMED   | 30.2 | 94.0 | 35 | 0    |
| 1946       | 6 16 18 | 1 NOT NAMED   | 30.8 | 94.5 | 25 | 0    |
| 1946       | 7 5 6   | 2 NOT NAMED   | 29.0 | 79.0 | 35 | 0    |
| 1946       | 7 5 12  | 2 NOT NAMED   | 31.8 | 79.6 | 40 | 1006 |
| 1946       | 7 5 18  | 2 NOT NAMED   | 32.7 | 79.3 | 40 | 0    |
| 1946       | 7 6 0   | 2 NOT NAMED   | 33.4 | 78.9 | 40 | 0    |
| 1946       | 7 6 6   | 2 NOT NAMED   | 34.0 | 78.4 | 40 | 0    |
| 1946       | 7 6 12  | 2 NOT NAMED   | 34.6 | 77.7 | 40 | 0    |
| 1946       | 7 6 18  | 2 NOT NAMED   | 35.4 | 76.7 | 45 | 0    |

|      |    |    |    |             |      |      |    |     |
|------|----|----|----|-------------|------|------|----|-----|
| 1946 | 7  | 7  | 0  | 2 NOT NAMED | 36.1 | 75.4 | 55 | 0   |
| 1946 | 7  | 7  | 6  | 2 NOT NAMED | 36.3 | 73.8 | 60 | 0   |
| 1946 | 7  | 7  | 12 | 2 NOT NAMED | 36.5 | 72.3 | 65 | 0   |
| 1946 | 7  | 7  | 18 | 2 NOT NAMED | 36.7 | 70.8 | 70 | 0   |
| 1946 | 7  | 8  | 0  | 2 NOT NAMED | 37.0 | 69.3 | 70 | 0   |
| 1946 | 7  | 8  | 6  | 2 NOT NAMED | 37.5 | 67.7 | 70 | 0   |
| 1946 | 7  | 8  | 12 | 2 NOT NAMED | 38.0 | 66.0 | 70 | 0   |
| 1946 | 7  | 8  | 18 | 2 NOT NAMED | 38.5 | 64.5 | 70 | 0   |
| 1946 | 7  | 9  | 0  | 2 NOT NAMED | 39.0 | 63.0 | 65 | 0   |
| 1946 | 7  | 9  | 6  | 2 NOT NAMED | 39.6 | 61.6 | 60 | 0   |
| 1946 | 7  | 9  | 12 | 2 NOT NAMED | 40.4 | 60.1 | 55 | 0   |
| 1946 | 7  | 9  | 18 | 2 NOT NAMED | 41.4 | 58.2 | 50 | 0   |
| 1946 | 7  | 10 | 0  | 2 NOT NAMED | 42.7 | 56.0 | 45 | 0   |
| 1946 | 7  | 10 | 6  | 2 NOT NAMED | 44.2 | 53.8 | 40 | 0   |
| 1946 | 7  | 10 | 12 | 2 NOT NAMED | 44.8 | 51.5 | 40 | 0   |
| 1946 | 7  | 10 | 18 | 2 NOT NAMED | 46.0 | 49.7 | 35 | 0   |
| 1946 | 8  | 25 | 0  | 3 NOT NAMED | 20.5 | 93.2 | 35 | 0   |
| 1946 | 8  | 25 | 6  | 3 NOT NAMED | 21.1 | 95.0 | 35 | 0   |
| 1946 | 8  | 25 | 12 | 3 NOT NAMED | 21.4 | 96.0 | 35 | 0   |
| 1946 | 8  | 25 | 18 | 3 NOT NAMED | 21.9 | 97.8 | 35 | 0   |
| 1946 | 8  | 26 | 0  | 3 NOT NAMED | 22.5 | 99.9 | 30 | 0   |
| 1946 | 9  | 12 | 6  | 4 NOT NAMED | 23.8 | 79.6 | 50 | 0   |
| 1946 | 9  | 12 | 12 | 4 NOT NAMED | 24.9 | 79.2 | 55 | 0   |
| 1946 | 9  | 12 | 18 | 4 NOT NAMED | 25.6 | 78.8 | 60 | 0   |
| 1946 | 9  | 13 | 0  | 4 NOT NAMED | 26.4 | 77.9 | 65 | 0   |
| 1946 | 9  | 13 | 6  | 4 NOT NAMED | 27.2 | 76.8 | 75 | 994 |
| 1946 | 9  | 13 | 12 | 4 NOT NAMED | 28.4 | 75.0 | 85 | 0   |
| 1946 | 9  | 13 | 18 | 4 NOT NAMED | 30.1 | 73.5 | 85 | 975 |
| 1946 | 9  | 14 | 0  | 4 NOT NAMED | 31.8 | 72.0 | 80 | 0   |
| 1946 | 9  | 14 | 6  | 4 NOT NAMED | 33.4 | 70.9 | 80 | 0   |
| 1946 | 9  | 14 | 12 | 4 NOT NAMED | 35.0 | 70.0 | 75 | 0   |
| 1946 | 9  | 14 | 18 | 4 NOT NAMED | 36.8 | 68.8 | 75 | 0   |
| 1946 | 9  | 15 | 0  | 4 NOT NAMED | 38.7 | 67.5 | 70 | 0   |
| 1946 | 9  | 15 | 6  | 4 NOT NAMED | 40.7 | 66.0 | 65 | 0   |
| 1946 | 9  | 15 | 12 | 4 NOT NAMED | 42.7 | 64.2 | 60 | 0   |
| 1946 | 9  | 15 | 18 | 4 NOT NAMED | 44.8 | 62.0 | 55 | 0   |
| 1946 | 9  | 16 | 0  | 4 NOT NAMED | 47.0 | 58.9 | 50 | 0   |
| 1946 | 9  | 16 | 6  | 4 NOT NAMED | 48.7 | 54.2 | 50 | 0   |
| 1946 | 9  | 16 | 12 | 4 NOT NAMED | 49.7 | 49.4 | 45 | 0   |
| 1946 | 9  | 16 | 18 | 4 NOT NAMED | 49.8 | 46.4 | 45 | 0   |
| 1946 | 9  | 17 | 0  | 4 NOT NAMED | 49.9 | 43.2 | 45 | 0   |
| 1946 | 9  | 17 | 6  | 4 NOT NAMED | 50.0 | 39.1 | 45 | 0   |
| 1946 | 9  | 17 | 12 | 4 NOT NAMED | 51.0 | 35.0 | 40 | 0   |
| 1946 | 10 | 5  | 6  | 5 NOT NAMED | 18.0 | 87.2 | 35 | 0   |

|               |      |             |      |      |     |      |
|---------------|------|-------------|------|------|-----|------|
| 1946 10       | 5 12 | 5 NOT NAMED | 18.4 | 86.7 | 40  | 0    |
| 1946 10       | 5 18 | 5 NOT NAMED | 18.6 | 86.5 | 45  | 1005 |
| 1946 10       | 6 0  | 5 NOT NAMED | 18.8 | 86.2 | 55  | 0    |
| 1946 10       | 6 6  | 5 NOT NAMED | 19.1 | 86.0 | 60  | 0    |
| 1946 10       | 6 12 | 5 NOT NAMED | 19.6 | 85.6 | 65  | 993  |
| 1946 10       | 6 18 | 5 NOT NAMED | 20.3 | 85.1 | 75  | 0    |
| 1946 10       | 7 0  | 5 NOT NAMED | 21.3 | 84.6 | 85  | 0    |
| 1946 10       | 7 6  | 5 NOT NAMED | 22.3 | 84.1 | 100 | 0    |
| 1946 10       | 7 12 | 5 NOT NAMED | 23.7 | 83.6 | 110 | 0    |
| 1946 10       | 7 18 | 5 NOT NAMED | 25.4 | 83.2 | 115 | 979  |
| 1946 10       | 8 0  | 5 NOT NAMED | 27.0 | 82.8 | 65  | 0    |
| 1946 10       | 8 6  | 5 NOT NAMED | 28.6 | 82.6 | 40  | 0    |
| 1946 10       | 8 12 | 5 NOT NAMED | 30.3 | 82.4 | 35  | 0    |
| 1946 10       | 8 18 | 5 NOT NAMED | 31.9 | 82.1 | 35  | 0    |
| 1946 10       | 9 0  | 5 NOT NAMED | 33.5 | 81.6 | 30  | 0    |
| 1946 10       | 9 6  | 5 NOT NAMED | 34.6 | 80.7 | 30  | 0    |
| 1946 10       | 9 12 | 5 NOT NAMED | 35.3 | 79.4 | 25  | 0    |
| 1946 10       | 9 18 | 5 NOT NAMED | 35.8 | 77.8 | 25  | 0    |
| 1946 10 10    | 0    | 5 NOT NAMED | 36.1 | 76.2 | 25  | 0    |
| 1946 10 10    | 6    | 5 NOT NAMED | 36.3 | 74.6 | 25  | 0    |
| 1946 10 10 12 |      | 5 NOT NAMED | 36.2 | 72.9 | 25  | 0    |
| 1946 10 10 18 |      | 5 NOT NAMED | 35.9 | 70.2 | 25  | 0    |
| 1946 10 11    | 0    | 5 NOT NAMED | 35.3 | 67.2 | 25  | 0    |
| 1946 10 11    | 6    | 5 NOT NAMED | 34.5 | 65.0 | 25  | 0    |
| 1946 10 11 12 |      | 5 NOT NAMED | 33.8 | 63.5 | 25  | 0    |
| 1946 10 11 18 |      | 5 NOT NAMED | 33.2 | 62.7 | 25  | 0    |
| 1946 10 12    | 0    | 5 NOT NAMED | 32.6 | 62.1 | 25  | 0    |
| 1946 10 12    | 6    | 5 NOT NAMED | 32.1 | 61.7 | 25  | 0    |
| 1946 10 12 12 |      | 5 NOT NAMED | 31.5 | 61.4 | 25  | 0    |
| 1946 10 12 18 |      | 5 NOT NAMED | 30.4 | 61.2 | 25  | 0    |
| 1946 10 13    | 0    | 5 NOT NAMED | 29.2 | 61.3 | 25  | 0    |
| 1946 10 13    | 6    | 5 NOT NAMED | 28.1 | 62.0 | 25  | 0    |
| 1946 10 13 12 |      | 5 NOT NAMED | 27.2 | 62.9 | 25  | 0    |
| 1946 10 13 18 |      | 5 NOT NAMED | 26.6 | 64.0 | 25  | 0    |
| 1946 10 14    | 0    | 5 NOT NAMED | 26.4 | 65.0 | 25  | 0    |
| 1946 10 14    | 6    | 5 NOT NAMED | 26.3 | 65.8 | 25  | 0    |
| 1946 10 14 12 |      | 5 NOT NAMED | 26.2 | 66.7 | 25  | 0    |
| 1946 10 14 18 |      | 5 NOT NAMED | 26.2 | 67.7 | 25  | 0    |
| 1946 10 31    | 6    | 6 NOT NAMED | 20.0 | 71.0 | 35  | 0    |
| 1946 10 31 12 |      | 6 NOT NAMED | 20.6 | 72.0 | 35  | 0    |
| 1946 10 31 18 |      | 6 NOT NAMED | 21.9 | 73.5 | 35  | 0    |
| 1946 11       | 1 0  | 6 NOT NAMED | 23.0 | 75.0 | 40  | 0    |
| 1946 11       | 1 6  | 6 NOT NAMED | 23.9 | 76.5 | 40  | 0    |
| 1946 11       | 1 12 | 6 NOT NAMED | 24.8 | 78.0 | 40  | 0    |

|      |    |    |    |             |      |      |    |   |
|------|----|----|----|-------------|------|------|----|---|
| 1946 | 11 | 1  | 18 | 6 NOT NAMED | 25.8 | 79.3 | 40 | 0 |
| 1946 | 11 | 2  | 0  | 6 NOT NAMED | 26.8 | 80.3 | 35 | 0 |
| 1946 | 11 | 2  | 6  | 6 NOT NAMED | 27.7 | 81.2 | 30 | 0 |
| 1946 | 11 | 2  | 12 | 6 NOT NAMED | 28.5 | 81.8 | 25 | 0 |
| 1946 | 11 | 2  | 18 | 6 NOT NAMED | 30.2 | 82.0 | 25 | 0 |
| 1946 | 11 | 3  | 0  | 6 NOT NAMED | 31.7 | 81.0 | 20 | 0 |
| 1946 | 11 | 3  | 6  | 6 NOT NAMED | 32.3 | 79.9 | 20 | 0 |
| 1946 | 11 | 3  | 12 | 6 NOT NAMED | 33.0 | 78.8 | 15 | 0 |
| 1947 | 7  | 31 | 6  | 1 NOT NAMED | 19.5 | 92.0 | 35 | 0 |
| 1947 | 7  | 31 | 12 | 1 NOT NAMED | 20.2 | 93.8 | 35 | 0 |
| 1947 | 7  | 31 | 18 | 1 NOT NAMED | 20.6 | 94.7 | 35 | 0 |
| 1947 | 8  | 1  | 0  | 1 NOT NAMED | 21.1 | 95.3 | 35 | 0 |
| 1947 | 8  | 1  | 6  | 1 NOT NAMED | 22.6 | 95.8 | 35 | 0 |
| 1947 | 8  | 1  | 12 | 1 NOT NAMED | 24.1 | 96.2 | 35 | 0 |
| 1947 | 8  | 1  | 18 | 1 NOT NAMED | 25.0 | 96.7 | 35 | 0 |
| 1947 | 8  | 2  | 0  | 1 NOT NAMED | 25.6 | 97.3 | 40 | 0 |
| 1947 | 8  | 2  | 6  | 1 NOT NAMED | 26.0 | 98.2 | 40 | 0 |
| 1947 | 8  | 2  | 12 | 1 NOT NAMED | 26.3 | 99.0 | 35 | 0 |
| 1947 | 8  | 9  | 6  | 2 NOT NAMED | 13.7 | 74.6 | 35 | 0 |
| 1947 | 8  | 9  | 12 | 2 NOT NAMED | 13.8 | 75.5 | 35 | 0 |
| 1947 | 8  | 9  | 18 | 2 NOT NAMED | 13.9 | 76.4 | 35 | 0 |
| 1947 | 8  | 10 | 0  | 2 NOT NAMED | 14.1 | 77.3 | 35 | 0 |
| 1947 | 8  | 10 | 6  | 2 NOT NAMED | 14.5 | 78.2 | 35 | 0 |
| 1947 | 8  | 10 | 12 | 2 NOT NAMED | 15.0 | 79.0 | 35 | 0 |
| 1947 | 8  | 10 | 18 | 2 NOT NAMED | 15.5 | 79.6 | 35 | 0 |
| 1947 | 8  | 11 | 0  | 2 NOT NAMED | 16.0 | 80.1 | 35 | 0 |
| 1947 | 8  | 11 | 6  | 2 NOT NAMED | 16.6 | 80.5 | 35 | 0 |
| 1947 | 8  | 11 | 12 | 2 NOT NAMED | 17.2 | 81.0 | 40 | 0 |
| 1947 | 8  | 11 | 18 | 2 NOT NAMED | 17.9 | 82.0 | 40 | 0 |
| 1947 | 8  | 12 | 0  | 2 NOT NAMED | 18.7 | 83.4 | 45 | 0 |
| 1947 | 8  | 12 | 6  | 2 NOT NAMED | 19.3 | 85.0 | 50 | 0 |
| 1947 | 8  | 12 | 12 | 2 NOT NAMED | 19.7 | 86.6 | 50 | 0 |
| 1947 | 8  | 12 | 18 | 2 NOT NAMED | 20.0 | 88.1 | 55 | 0 |
| 1947 | 8  | 13 | 0  | 2 NOT NAMED | 20.3 | 89.6 | 60 | 0 |
| 1947 | 8  | 13 | 6  | 2 NOT NAMED | 20.6 | 91.1 | 60 | 0 |
| 1947 | 8  | 13 | 12 | 2 NOT NAMED | 21.0 | 92.5 | 70 | 0 |
| 1947 | 8  | 13 | 18 | 2 NOT NAMED | 21.4 | 93.6 | 70 | 0 |
| 1947 | 8  | 14 | 0  | 2 NOT NAMED | 21.6 | 94.3 | 80 | 0 |
| 1947 | 8  | 14 | 6  | 2 NOT NAMED | 21.7 | 94.8 | 85 | 0 |
| 1947 | 8  | 14 | 12 | 2 NOT NAMED | 21.8 | 95.3 | 90 | 0 |
| 1947 | 8  | 14 | 18 | 2 NOT NAMED | 21.9 | 95.8 | 90 | 0 |
| 1947 | 8  | 15 | 0  | 2 NOT NAMED | 22.0 | 96.4 | 95 | 0 |
| 1947 | 8  | 15 | 6  | 2 NOT NAMED | 22.0 | 97.2 | 95 | 0 |
| 1947 | 8  | 15 | 12 | 2 NOT NAMED | 22.0 | 98.0 | 60 | 0 |

|      |         |             |      |      |    |   |
|------|---------|-------------|------|------|----|---|
| 1947 | 8 15 18 | 2 NOT NAMED | 22.0 | 98.6 | 55 | 0 |
| 1947 | 8 16 0  | 2 NOT NAMED | 22.0 | 99.0 | 50 | 0 |
| 1947 | 8 16 6  | 2 NOT NAMED | 22.0 | 99.5 | 45 | 0 |
| 1947 | 8 18 18 | 3 NOT NAMED | 24.0 | 80.0 | 35 | 0 |
| 1947 | 8 19 0  | 3 NOT NAMED | 24.1 | 81.5 | 35 | 0 |
| 1947 | 8 19 6  | 3 NOT NAMED | 24.1 | 82.3 | 40 | 0 |
| 1947 | 8 19 12 | 3 NOT NAMED | 24.2 | 83.1 | 40 | 0 |
| 1947 | 8 19 18 | 3 NOT NAMED | 24.3 | 84.0 | 45 | 0 |
| 1947 | 8 20 0  | 3 NOT NAMED | 24.3 | 84.9 | 45 | 0 |
| 1947 | 8 20 6  | 3 NOT NAMED | 24.4 | 85.6 | 45 | 0 |
| 1947 | 8 20 12 | 3 NOT NAMED | 24.5 | 86.2 | 40 | 0 |
| 1947 | 8 20 18 | 3 NOT NAMED | 24.6 | 86.7 | 35 | 0 |
| 1947 | 8 21 0  | 3 NOT NAMED | 24.8 | 87.2 | 35 | 0 |
| 1947 | 8 21 6  | 3 NOT NAMED | 25.1 | 87.9 | 40 | 0 |
| 1947 | 8 21 12 | 3 NOT NAMED | 25.4 | 88.7 | 45 | 0 |
| 1947 | 8 21 18 | 3 NOT NAMED | 25.7 | 89.3 | 50 | 0 |
| 1947 | 8 22 0  | 3 NOT NAMED | 26.0 | 89.8 | 55 | 0 |
| 1947 | 8 22 6  | 3 NOT NAMED | 26.3 | 90.2 | 60 | 0 |
| 1947 | 8 22 12 | 3 NOT NAMED | 26.5 | 90.6 | 65 | 0 |
| 1947 | 8 22 18 | 3 NOT NAMED | 26.9 | 91.2 | 70 | 0 |
| 1947 | 8 23 0  | 3 NOT NAMED | 27.2 | 91.7 | 70 | 0 |
| 1947 | 8 23 6  | 3 NOT NAMED | 27.5 | 92.1 | 70 | 0 |
| 1947 | 8 23 12 | 3 NOT NAMED | 27.8 | 92.5 | 70 | 0 |
| 1947 | 8 23 18 | 3 NOT NAMED | 28.1 | 93.1 | 70 | 0 |
| 1947 | 8 24 0  | 3 NOT NAMED | 28.4 | 93.6 | 70 | 0 |
| 1947 | 8 24 6  | 3 NOT NAMED | 28.7 | 93.9 | 70 | 0 |
| 1947 | 8 24 12 | 3 NOT NAMED | 29.0 | 94.3 | 70 | 0 |
| 1947 | 8 24 18 | 3 NOT NAMED | 29.2 | 94.8 | 70 | 0 |
| 1947 | 8 25 0  | 3 NOT NAMED | 29.5 | 95.3 | 60 | 0 |
| 1947 | 8 25 6  | 3 NOT NAMED | 29.8 | 95.8 | 60 | 0 |
| 1947 | 8 25 12 | 3 NOT NAMED | 30.2 | 96.2 | 60 | 0 |
| 1947 | 8 25 18 | 3 NOT NAMED | 30.5 | 96.6 | 55 | 0 |
| 1947 | 8 26 0  | 3 NOT NAMED | 30.8 | 97.0 | 35 | 0 |
| 1947 | 8 26 6  | 3 NOT NAMED | 31.0 | 97.3 | 25 | 0 |
| 1947 | 8 26 12 | 3 NOT NAMED | 31.4 | 97.5 | 20 | 0 |
| 1947 | 8 26 18 | 3 NOT NAMED | 31.8 | 97.7 | 20 | 0 |
| 1947 | 8 27 0  | 3 NOT NAMED | 32.3 | 97.8 | 15 | 0 |
| 1947 | 8 27 6  | 3 NOT NAMED | 33.3 | 97.9 | 15 | 0 |
| 1947 | 8 27 12 | 3 NOT NAMED | 34.0 | 97.9 | 15 | 0 |
| 1947 | 8 27 18 | 3 NOT NAMED | 35.0 | 97.9 | 15 | 0 |
| 1947 | 9 4 6   | 4 NOT NAMED | 14.5 | 20.1 | 45 | 0 |
| 1947 | 9 4 12  | 4 NOT NAMED | 14.3 | 21.5 | 50 | 0 |
| 1947 | 9 4 18  | 4 NOT NAMED | 14.2 | 22.8 | 60 | 0 |
| 1947 | 9 5 0   | 4 NOT NAMED | 14.1 | 24.0 | 65 | 0 |

|      |   |    |    |             |      |      |     |   |
|------|---|----|----|-------------|------|------|-----|---|
| 1947 | 9 | 5  | 6  | 4 NOT NAMED | 14.0 | 25.0 | 65  | 0 |
| 1947 | 9 | 5  | 12 | 4 NOT NAMED | 14.0 | 26.1 | 70  | 0 |
| 1947 | 9 | 5  | 18 | 4 NOT NAMED | 14.0 | 27.1 | 70  | 0 |
| 1947 | 9 | 6  | 0  | 4 NOT NAMED | 14.1 | 28.2 | 70  | 0 |
| 1947 | 9 | 6  | 6  | 4 NOT NAMED | 14.2 | 29.3 | 70  | 0 |
| 1947 | 9 | 6  | 12 | 4 NOT NAMED | 14.3 | 30.4 | 75  | 0 |
| 1947 | 9 | 6  | 18 | 4 NOT NAMED | 14.3 | 31.5 | 75  | 0 |
| 1947 | 9 | 7  | 0  | 4 NOT NAMED | 14.3 | 32.6 | 75  | 0 |
| 1947 | 9 | 7  | 6  | 4 NOT NAMED | 14.2 | 33.7 | 75  | 0 |
| 1947 | 9 | 7  | 12 | 4 NOT NAMED | 14.0 | 34.8 | 75  | 0 |
| 1947 | 9 | 7  | 18 | 4 NOT NAMED | 13.7 | 36.0 | 80  | 0 |
| 1947 | 9 | 8  | 0  | 4 NOT NAMED | 13.3 | 37.2 | 80  | 0 |
| 1947 | 9 | 8  | 6  | 4 NOT NAMED | 12.8 | 38.5 | 80  | 0 |
| 1947 | 9 | 8  | 12 | 4 NOT NAMED | 12.4 | 39.8 | 80  | 0 |
| 1947 | 9 | 8  | 18 | 4 NOT NAMED | 12.1 | 41.0 | 80  | 0 |
| 1947 | 9 | 9  | 0  | 4 NOT NAMED | 11.9 | 42.0 | 80  | 0 |
| 1947 | 9 | 9  | 6  | 4 NOT NAMED | 11.7 | 42.9 | 80  | 0 |
| 1947 | 9 | 9  | 12 | 4 NOT NAMED | 11.6 | 43.8 | 85  | 0 |
| 1947 | 9 | 9  | 18 | 4 NOT NAMED | 11.6 | 44.8 | 85  | 0 |
| 1947 | 9 | 10 | 0  | 4 NOT NAMED | 11.7 | 45.7 | 85  | 0 |
| 1947 | 9 | 10 | 6  | 4 NOT NAMED | 12.0 | 46.7 | 85  | 0 |
| 1947 | 9 | 10 | 12 | 4 NOT NAMED | 12.3 | 47.6 | 90  | 0 |
| 1947 | 9 | 10 | 18 | 4 NOT NAMED | 12.7 | 48.6 | 90  | 0 |
| 1947 | 9 | 11 | 0  | 4 NOT NAMED | 13.2 | 49.7 | 90  | 0 |
| 1947 | 9 | 11 | 6  | 4 NOT NAMED | 13.7 | 50.5 | 95  | 0 |
| 1947 | 9 | 11 | 12 | 4 NOT NAMED | 14.2 | 51.4 | 95  | 0 |
| 1947 | 9 | 11 | 18 | 4 NOT NAMED | 15.1 | 52.9 | 95  | 0 |
| 1947 | 9 | 12 | 0  | 4 NOT NAMED | 16.1 | 54.7 | 100 | 0 |
| 1947 | 9 | 12 | 6  | 4 NOT NAMED | 17.2 | 56.7 | 100 | 0 |
| 1947 | 9 | 12 | 12 | 4 NOT NAMED | 18.2 | 58.6 | 105 | 0 |
| 1947 | 9 | 12 | 18 | 4 NOT NAMED | 18.9 | 60.0 | 105 | 0 |
| 1947 | 9 | 13 | 0  | 4 NOT NAMED | 19.5 | 61.4 | 110 | 0 |
| 1947 | 9 | 13 | 6  | 4 NOT NAMED | 20.3 | 62.9 | 110 | 0 |
| 1947 | 9 | 13 | 12 | 4 NOT NAMED | 21.0 | 64.3 | 115 | 0 |
| 1947 | 9 | 13 | 18 | 4 NOT NAMED | 21.5 | 65.3 | 115 | 0 |
| 1947 | 9 | 14 | 0  | 4 NOT NAMED | 22.0 | 66.2 | 120 | 0 |
| 1947 | 9 | 14 | 6  | 4 NOT NAMED | 22.5 | 67.2 | 120 | 0 |
| 1947 | 9 | 14 | 12 | 4 NOT NAMED | 23.0 | 68.2 | 125 | 0 |
| 1947 | 9 | 14 | 18 | 4 NOT NAMED | 23.6 | 69.5 | 125 | 0 |
| 1947 | 9 | 15 | 0  | 4 NOT NAMED | 24.3 | 71.1 | 125 | 0 |
| 1947 | 9 | 15 | 6  | 4 NOT NAMED | 25.1 | 72.2 | 130 | 0 |
| 1947 | 9 | 15 | 12 | 4 NOT NAMED | 25.8 | 73.3 | 130 | 0 |
| 1947 | 9 | 15 | 18 | 4 NOT NAMED | 26.2 | 74.2 | 135 | 0 |
| 1947 | 9 | 16 | 0  | 4 NOT NAMED | 26.4 | 74.9 | 135 | 0 |

|      |      |    |             |      |      |     |      |
|------|------|----|-------------|------|------|-----|------|
| 1947 | 9 16 | 6  | 4 NOT NAMED | 26.5 | 75.4 | 140 | 0    |
| 1947 | 9 16 | 12 | 4 NOT NAMED | 26.6 | 76.0 | 140 | 0    |
| 1947 | 9 16 | 18 | 4 NOT NAMED | 26.7 | 76.8 | 140 | 0    |
| 1947 | 9 17 | 0  | 4 NOT NAMED | 26.7 | 77.6 | 140 | 0    |
| 1947 | 9 17 | 6  | 4 NOT NAMED | 26.6 | 78.5 | 140 | 0    |
| 1947 | 9 17 | 12 | 4 NOT NAMED | 26.5 | 79.5 | 135 | 947  |
| 1947 | 9 17 | 18 | 4 NOT NAMED | 26.3 | 80.4 | 130 | 0    |
| 1947 | 9 18 | 0  | 4 NOT NAMED | 26.1 | 81.2 | 120 | 0    |
| 1947 | 9 18 | 6  | 4 NOT NAMED | 26.1 | 81.8 | 85  | 0    |
| 1947 | 9 18 | 12 | 4 NOT NAMED | 26.3 | 82.5 | 85  | 0    |
| 1947 | 9 18 | 18 | 4 NOT NAMED | 26.9 | 83.8 | 80  | 0    |
| 1947 | 9 19 | 0  | 4 NOT NAMED | 27.7 | 85.6 | 80  | 0    |
| 1947 | 9 19 | 6  | 4 NOT NAMED | 28.9 | 87.7 | 80  | 0    |
| 1947 | 9 19 | 12 | 4 NOT NAMED | 30.0 | 89.7 | 80  | 966  |
| 1947 | 9 19 | 18 | 4 NOT NAMED | 30.4 | 91.0 | 75  | 970  |
| 1947 | 9 20 | 0  | 4 NOT NAMED | 30.8 | 92.2 | 60  | 984  |
| 1947 | 9 20 | 6  | 4 NOT NAMED | 31.6 | 93.7 | 35  | 987  |
| 1947 | 9 20 | 12 | 4 NOT NAMED | 32.7 | 95.2 | 30  | 994  |
| 1947 | 9 20 | 18 | 4 NOT NAMED | 34.1 | 95.9 | 25  | 996  |
| 1947 | 9 21 | 0  | 4 NOT NAMED | 35.4 | 94.6 | 25  | 997  |
| 1947 | 9 21 | 6  | 4 NOT NAMED | 36.4 | 93.3 | 20  | 999  |
| 1947 | 9 21 | 12 | 4 NOT NAMED | 37.4 | 92.0 | 20  | 1000 |
| 1947 | 9 7  | 18 | 5 NOT NAMED | 27.9 | 85.0 | 40  | 0    |
| 1947 | 9 8  | 0  | 5 NOT NAMED | 29.0 | 86.6 | 40  | 0    |
| 1947 | 9 8  | 6  | 5 NOT NAMED | 29.5 | 87.3 | 40  | 0    |
| 1947 | 9 8  | 12 | 5 NOT NAMED | 30.0 | 88.0 | 35  | 0    |
| 1947 | 9 8  | 18 | 5 NOT NAMED | 30.7 | 89.0 | 30  | 0    |
| 1947 | 9 20 | 6  | 6 NOT NAMED | 18.6 | 78.1 | 35  | 0    |
| 1947 | 9 20 | 12 | 6 NOT NAMED | 18.9 | 78.7 | 35  | 0    |
| 1947 | 9 20 | 18 | 6 NOT NAMED | 19.2 | 79.4 | 35  | 0    |
| 1947 | 9 21 | 0  | 6 NOT NAMED | 19.6 | 80.0 | 35  | 0    |
| 1947 | 9 21 | 6  | 6 NOT NAMED | 20.0 | 80.6 | 40  | 0    |
| 1947 | 9 21 | 12 | 6 NOT NAMED | 20.5 | 81.2 | 40  | 0    |
| 1947 | 9 21 | 18 | 6 NOT NAMED | 21.3 | 82.0 | 40  | 0    |
| 1947 | 9 22 | 0  | 6 NOT NAMED | 22.2 | 82.8 | 40  | 0    |
| 1947 | 9 22 | 6  | 6 NOT NAMED | 23.0 | 83.4 | 40  | 0    |
| 1947 | 9 22 | 12 | 6 NOT NAMED | 23.8 | 83.4 | 45  | 0    |
| 1947 | 9 22 | 18 | 6 NOT NAMED | 24.7 | 83.7 | 45  | 0    |
| 1947 | 9 23 | 0  | 6 NOT NAMED | 25.7 | 83.6 | 45  | 0    |
| 1947 | 9 23 | 6  | 6 NOT NAMED | 26.7 | 83.4 | 50  | 0    |
| 1947 | 9 23 | 12 | 6 NOT NAMED | 27.7 | 83.2 | 50  | 0    |
| 1947 | 9 23 | 18 | 6 NOT NAMED | 28.5 | 83.0 | 50  | 0    |
| 1947 | 9 24 | 0  | 6 NOT NAMED | 29.4 | 82.7 | 50  | 989  |
| 1947 | 9 24 | 6  | 6 NOT NAMED | 31.2 | 82.1 | 45  | 0    |

|      |    |    |    |             |      |      |    |     |
|------|----|----|----|-------------|------|------|----|-----|
| 1947 | 9  | 24 | 12 | 6 NOT NAMED | 33.0 | 81.2 | 35 | 0   |
| 1947 | 9  | 24 | 18 | 6 NOT NAMED | 34.1 | 80.2 | 30 | 0   |
| 1947 | 9  | 25 | 0  | 6 NOT NAMED | 35.1 | 78.8 | 25 | 0   |
| 1947 | 9  | 25 | 6  | 6 NOT NAMED | 36.0 | 76.9 | 20 | 0   |
| 1947 | 9  | 25 | 12 | 6 NOT NAMED | 37.0 | 75.0 | 15 | 0   |
| 1947 | 9  | 25 | 18 | 6 NOT NAMED | 37.7 | 73.5 | 15 | 0   |
| 1947 | 10 | 6  | 6  | 7 NOT NAMED | 22.0 | 77.0 | 45 | 0   |
| 1947 | 10 | 6  | 12 | 7 NOT NAMED | 26.0 | 77.8 | 45 | 0   |
| 1947 | 10 | 6  | 18 | 7 NOT NAMED | 28.8 | 78.9 | 45 | 0   |
| 1947 | 10 | 7  | 0  | 7 NOT NAMED | 30.4 | 80.3 | 40 | 0   |
| 1947 | 10 | 7  | 6  | 7 NOT NAMED | 30.9 | 82.7 | 35 | 0   |
| 1947 | 10 | 7  | 12 | 7 NOT NAMED | 30.8 | 83.3 | 30 | 0   |
| 1947 | 10 | 7  | 18 | 7 NOT NAMED | 30.1 | 84.8 | 30 | 0   |
| 1947 | 10 | 8  | 0  | 7 NOT NAMED | 29.3 | 83.8 | 25 | 0   |
| 1947 | 10 | 8  | 6  | 7 NOT NAMED | 30.6 | 82.8 | 25 | 0   |
| 1947 | 10 | 8  | 12 | 7 NOT NAMED | 32.1 | 82.6 | 20 | 0   |
| 1947 | 10 | 8  | 18 | 7 NOT NAMED | 33.6 | 82.3 | 20 | 0   |
| 1947 | 10 | 9  | 6  | 8 NOT NAMED | 15.4 | 82.0 | 35 | 0   |
| 1947 | 10 | 9  | 12 | 8 NOT NAMED | 16.0 | 82.2 | 35 | 0   |
| 1947 | 10 | 9  | 18 | 8 NOT NAMED | 16.5 | 82.5 | 35 | 0   |
| 1947 | 10 | 10 | 0  | 8 NOT NAMED | 17.0 | 82.7 | 40 | 0   |
| 1947 | 10 | 10 | 6  | 8 NOT NAMED | 17.5 | 82.9 | 40 | 0   |
| 1947 | 10 | 10 | 12 | 8 NOT NAMED | 18.0 | 83.0 | 45 | 0   |
| 1947 | 10 | 10 | 18 | 8 NOT NAMED | 19.7 | 83.5 | 50 | 0   |
| 1947 | 10 | 11 | 0  | 8 NOT NAMED | 20.7 | 83.7 | 55 | 0   |
| 1947 | 10 | 11 | 6  | 8 NOT NAMED | 22.3 | 83.7 | 55 | 0   |
| 1947 | 10 | 11 | 12 | 8 NOT NAMED | 23.0 | 83.2 | 60 | 0   |
| 1947 | 10 | 11 | 18 | 8 NOT NAMED | 24.1 | 82.3 | 65 | 0   |
| 1947 | 10 | 12 | 0  | 8 NOT NAMED | 25.1 | 81.4 | 70 | 0   |
| 1947 | 10 | 12 | 6  | 8 NOT NAMED | 25.8 | 80.6 | 75 | 0   |
| 1947 | 10 | 12 | 12 | 8 NOT NAMED | 26.6 | 79.8 | 75 | 991 |
| 1947 | 10 | 12 | 18 | 8 NOT NAMED | 27.3 | 78.7 | 75 | 0   |
| 1947 | 10 | 13 | 0  | 8 NOT NAMED | 28.1 | 77.5 | 70 | 0   |
| 1947 | 10 | 13 | 6  | 8 NOT NAMED | 29.3 | 75.8 | 70 | 0   |
| 1947 | 10 | 13 | 12 | 8 NOT NAMED | 30.5 | 74.6 | 70 | 0   |
| 1947 | 10 | 13 | 18 | 8 NOT NAMED | 31.4 | 74.6 | 70 | 0   |
| 1947 | 10 | 14 | 0  | 8 NOT NAMED | 31.9 | 75.7 | 65 | 0   |
| 1947 | 10 | 14 | 6  | 8 NOT NAMED | 31.8 | 76.4 | 65 | 0   |
| 1947 | 10 | 14 | 12 | 8 NOT NAMED | 31.8 | 77.1 | 65 | 0   |
| 1947 | 10 | 14 | 18 | 8 NOT NAMED | 31.8 | 77.6 | 65 | 0   |
| 1947 | 10 | 15 | 0  | 8 NOT NAMED | 31.9 | 78.2 | 70 | 0   |
| 1947 | 10 | 15 | 6  | 8 NOT NAMED | 32.0 | 79.5 | 75 | 0   |
| 1947 | 10 | 15 | 12 | 8 NOT NAMED | 31.9 | 81.0 | 75 | 973 |
| 1947 | 10 | 15 | 18 | 8 NOT NAMED | 31.8 | 82.3 | 65 | 0   |



|      |    |    |    |             |      |      |     |   |
|------|----|----|----|-------------|------|------|-----|---|
| 1947 | 10 | 16 | 0  | 8 NOT NAMED | 31.7 | 83.4 | 50  | 0 |
| 1947 | 10 | 16 | 6  | 8 NOT NAMED | 31.8 | 84.2 | 40  | 0 |
| 1947 | 10 | 16 | 12 | 8 NOT NAMED | 32.2 | 85.0 | 35  | 0 |
| 1947 | 10 | 16 | 18 | 8 NOT NAMED | 32.5 | 85.8 | 25  | 0 |
| 1947 | 10 | 16 | 18 | 9 NOT NAMED | 17.4 | 62.4 | 35  | 0 |
| 1947 | 10 | 17 | 0  | 9 NOT NAMED | 18.4 | 63.9 | 50  | 0 |
| 1947 | 10 | 17 | 6  | 9 NOT NAMED | 19.0 | 65.3 | 60  | 0 |
| 1947 | 10 | 17 | 12 | 9 NOT NAMED | 19.7 | 66.6 | 65  | 0 |
| 1947 | 10 | 17 | 18 | 9 NOT NAMED | 20.4 | 67.8 | 70  | 0 |
| 1947 | 10 | 18 | 0  | 9 NOT NAMED | 21.0 | 68.7 | 75  | 0 |
| 1947 | 10 | 18 | 6  | 9 NOT NAMED | 21.8 | 69.6 | 75  | 0 |
| 1947 | 10 | 18 | 12 | 9 NOT NAMED | 22.8 | 70.2 | 80  | 0 |
| 1947 | 10 | 18 | 18 | 9 NOT NAMED | 23.7 | 70.5 | 85  | 0 |
| 1947 | 10 | 19 | 0  | 9 NOT NAMED | 24.7 | 70.5 | 85  | 0 |
| 1947 | 10 | 19 | 6  | 9 NOT NAMED | 26.1 | 70.2 | 90  | 0 |
| 1947 | 10 | 19 | 12 | 9 NOT NAMED | 27.7 | 69.7 | 95  | 0 |
| 1947 | 10 | 19 | 18 | 9 NOT NAMED | 28.9 | 69.0 | 95  | 0 |
| 1947 | 10 | 20 | 0  | 9 NOT NAMED | 30.1 | 68.1 | 100 | 0 |
| 1947 | 10 | 20 | 6  | 9 NOT NAMED | 31.4 | 66.9 | 105 | 0 |
| 1947 | 10 | 20 | 12 | 9 NOT NAMED | 32.7 | 65.7 | 105 | 0 |
| 1947 | 10 | 20 | 18 | 9 NOT NAMED | 33.7 | 64.5 | 105 | 0 |
| 1947 | 10 | 21 | 0  | 9 NOT NAMED | 34.8 | 63.2 | 95  | 0 |
| 1947 | 10 | 21 | 6  | 9 NOT NAMED | 36.1 | 61.4 | 85  | 0 |
| 1947 | 10 | 21 | 12 | 9 NOT NAMED | 37.5 | 59.0 | 65  | 0 |
| 1947 | 10 | 21 | 18 | 9 NOT NAMED | 38.8 | 56.6 | 60  | 0 |
| 1947 | 10 | 22 | 0  | 9 NOT NAMED | 40.0 | 54.1 | 55  | 0 |
| 1947 | 10 | 22 | 6  | 9 NOT NAMED | 41.5 | 50.0 | 50  | 0 |
| 1948 | 5  | 22 | 6  | 1 NOT NAMED | 16.0 | 75.0 | 35  | 0 |
| 1948 | 5  | 22 | 12 | 1 NOT NAMED | 18.2 | 73.1 | 35  | 0 |
| 1948 | 5  | 22 | 18 | 1 NOT NAMED | 19.4 | 72.2 | 35  | 0 |
| 1948 | 5  | 23 | 0  | 1 NOT NAMED | 20.5 | 71.5 | 35  | 0 |
| 1948 | 5  | 23 | 6  | 1 NOT NAMED | 21.4 | 70.9 | 35  | 0 |
| 1948 | 5  | 23 | 12 | 1 NOT NAMED | 22.4 | 70.3 | 35  | 0 |
| 1948 | 5  | 23 | 18 | 1 NOT NAMED | 23.5 | 69.7 | 35  | 0 |
| 1948 | 5  | 24 | 0  | 1 NOT NAMED | 24.6 | 69.2 | 35  | 0 |
| 1948 | 5  | 24 | 6  | 1 NOT NAMED | 25.9 | 68.7 | 40  | 0 |
| 1948 | 5  | 24 | 12 | 1 NOT NAMED | 26.9 | 68.4 | 40  | 0 |
| 1948 | 5  | 24 | 18 | 1 NOT NAMED | 27.6 | 68.2 | 40  | 0 |
| 1948 | 5  | 25 | 0  | 1 NOT NAMED | 28.3 | 68.1 | 45  | 0 |
| 1948 | 5  | 25 | 6  | 1 NOT NAMED | 29.0 | 68.0 | 45  | 0 |
| 1948 | 5  | 25 | 12 | 1 NOT NAMED | 29.7 | 68.0 | 45  | 0 |
| 1948 | 5  | 25 | 18 | 1 NOT NAMED | 30.1 | 68.0 | 45  | 0 |
| 1948 | 5  | 26 | 0  | 1 NOT NAMED | 30.3 | 68.0 | 45  | 0 |
| 1948 | 5  | 26 | 6  | 1 NOT NAMED | 30.7 | 68.0 | 45  | 0 |

|      |         |             |      |      |     |   |
|------|---------|-------------|------|------|-----|---|
| 1948 | 5 26 12 | 1 NOT NAMED | 31.0 | 68.0 | 45  | 0 |
| 1948 | 5 26 18 | 1 NOT NAMED | 31.3 | 68.0 | 40  | 0 |
| 1948 | 5 27 0  | 1 NOT NAMED | 31.5 | 68.0 | 40  | 0 |
| 1948 | 5 27 6  | 1 NOT NAMED | 31.8 | 68.0 | 40  | 0 |
| 1948 | 5 27 12 | 1 NOT NAMED | 32.0 | 68.0 | 40  | 0 |
| 1948 | 5 27 18 | 1 NOT NAMED | 32.8 | 68.0 | 40  | 0 |
| 1948 | 5 28 0  | 1 NOT NAMED | 33.7 | 68.0 | 35  | 0 |
| 1948 | 5 28 6  | 1 NOT NAMED | 34.3 | 68.0 | 30  | 0 |
| 1948 | 5 28 12 | 1 NOT NAMED | 35.0 | 68.0 | 30  | 0 |
| 1948 | 5 28 18 | 1 NOT NAMED | 37.9 | 68.0 | 25  | 0 |
| 1948 | 7 7 18  | 2 NOT NAMED | 26.3 | 90.6 | 35  | 0 |
| 1948 | 7 8 0   | 2 NOT NAMED | 27.2 | 90.0 | 35  | 0 |
| 1948 | 7 8 6   | 2 NOT NAMED | 27.6 | 89.6 | 35  | 0 |
| 1948 | 7 8 12  | 2 NOT NAMED | 28.0 | 89.2 | 35  | 0 |
| 1948 | 7 8 18  | 2 NOT NAMED | 28.7 | 88.1 | 35  | 0 |
| 1948 | 7 9 0   | 2 NOT NAMED | 29.6 | 86.9 | 35  | 0 |
| 1948 | 7 9 6   | 2 NOT NAMED | 30.2 | 86.2 | 35  | 0 |
| 1948 | 7 9 12  | 2 NOT NAMED | 30.8 | 85.9 | 35  | 0 |
| 1948 | 7 9 18  | 2 NOT NAMED | 31.3 | 85.8 | 30  | 0 |
| 1948 | 7 10 0  | 2 NOT NAMED | 31.7 | 85.8 | 30  | 0 |
| 1948 | 7 10 6  | 2 NOT NAMED | 32.2 | 85.8 | 30  | 0 |
| 1948 | 7 10 12 | 2 NOT NAMED | 32.7 | 85.9 | 25  | 0 |
| 1948 | 7 10 18 | 2 NOT NAMED | 33.3 | 86.0 | 25  | 0 |
| 1948 | 7 11 0  | 2 NOT NAMED | 34.0 | 86.1 | 20  | 0 |
| 1948 | 7 11 6  | 2 NOT NAMED | 34.6 | 86.3 | 20  | 0 |
| 1948 | 7 11 12 | 2 NOT NAMED | 35.2 | 86.6 | 15  | 0 |
| 1948 | 7 11 18 | 2 NOT NAMED | 35.5 | 86.8 | 15  | 0 |
| 1948 | 8 26 6  | 3 NOT NAMED | 19.5 | 58.9 | 50  | 0 |
| 1948 | 8 26 12 | 3 NOT NAMED | 20.9 | 61.0 | 65  | 0 |
| 1948 | 8 26 18 | 3 NOT NAMED | 21.8 | 62.6 | 70  | 0 |
| 1948 | 8 27 0  | 3 NOT NAMED | 22.8 | 64.1 | 75  | 0 |
| 1948 | 8 27 6  | 3 NOT NAMED | 23.8 | 65.5 | 80  | 0 |
| 1948 | 8 27 12 | 3 NOT NAMED | 24.8 | 66.7 | 85  | 0 |
| 1948 | 8 27 18 | 3 NOT NAMED | 25.6 | 67.6 | 90  | 0 |
| 1948 | 8 28 0  | 3 NOT NAMED | 26.1 | 68.4 | 95  | 0 |
| 1948 | 8 28 6  | 3 NOT NAMED | 26.5 | 69.0 | 95  | 0 |
| 1948 | 8 28 12 | 3 NOT NAMED | 27.0 | 69.7 | 100 | 0 |
| 1948 | 8 28 18 | 3 NOT NAMED | 27.6 | 70.4 | 105 | 0 |
| 1948 | 8 29 0  | 3 NOT NAMED | 28.2 | 71.2 | 105 | 0 |
| 1948 | 8 29 6  | 3 NOT NAMED | 28.6 | 71.9 | 105 | 0 |
| 1948 | 8 29 12 | 3 NOT NAMED | 29.1 | 72.5 | 100 | 0 |
| 1948 | 8 29 18 | 3 NOT NAMED | 29.7 | 73.4 | 100 | 0 |
| 1948 | 8 30 0  | 3 NOT NAMED | 30.3 | 74.3 | 95  | 0 |
| 1948 | 8 30 6  | 3 NOT NAMED | 30.8 | 75.0 | 95  | 0 |

|      |   |    |    |   |           |      |      |    |      |
|------|---|----|----|---|-----------|------|------|----|------|
| 1948 | 8 | 30 | 12 | 3 | NOT NAMED | 31.3 | 75.4 | 90 | 0    |
| 1948 | 8 | 30 | 18 | 3 | NOT NAMED | 32.0 | 75.4 | 85 | 0    |
| 1948 | 8 | 31 | 0  | 3 | NOT NAMED | 32.8 | 75.1 | 80 | 0    |
| 1948 | 8 | 31 | 6  | 3 | NOT NAMED | 33.4 | 74.6 | 75 | 0    |
| 1948 | 8 | 31 | 12 | 3 | NOT NAMED | 34.1 | 73.6 | 70 | 0    |
| 1948 | 8 | 31 | 18 | 3 | NOT NAMED | 35.3 | 71.6 | 70 | 0    |
| 1948 | 9 | 1  | 0  | 3 | NOT NAMED | 37.0 | 68.7 | 65 | 0    |
| 1948 | 9 | 1  | 6  | 3 | NOT NAMED | 39.0 | 65.1 | 60 | 0    |
| 1948 | 9 | 1  | 12 | 3 | NOT NAMED | 41.0 | 61.8 | 60 | 0    |
| 1948 | 9 | 1  | 18 | 3 | NOT NAMED | 42.9 | 59.4 | 55 | 0    |
| 1948 | 9 | 2  | 0  | 3 | NOT NAMED | 44.8 | 57.8 | 50 | 0    |
| 1948 | 9 | 2  | 6  | 3 | NOT NAMED | 48.5 | 55.3 | 45 | 0    |
| 1948 | 9 | 2  | 12 | 3 | NOT NAMED | 51.7 | 52.8 | 45 | 0    |
| 1948 | 9 | 2  | 18 | 3 | NOT NAMED | 52.8 | 51.4 | 40 | 0    |
| 1948 | 9 | 3  | 0  | 3 | NOT NAMED | 53.8 | 50.0 | 40 | 0    |
| 1948 | 9 | 3  | 6  | 3 | NOT NAMED | 54.9 | 47.5 | 40 | 0    |
| 1948 | 9 | 3  | 12 | 3 | NOT NAMED | 56.0 | 45.0 | 35 | 0    |
| 1948 | 9 | 3  | 18 | 3 | NOT NAMED | 57.0 | 43.0 | 35 | 0    |
| 1948 | 9 | 4  | 0  | 3 | NOT NAMED | 58.0 | 41.0 | 35 | 0    |
| 1948 | 9 | 4  | 6  | 3 | NOT NAMED | 58.9 | 39.1 | 35 | 0    |
| 1948 | 9 | 4  | 12 | 3 | NOT NAMED | 59.8 | 37.2 | 35 | 0    |
| 1948 | 9 | 4  | 18 | 3 | NOT NAMED | 61.2 | 34.8 | 35 | 0    |
| 1948 | 8 | 31 | 0  | 4 | NOT NAMED | 13.5 | 53.0 | 50 | 1009 |
| 1948 | 8 | 31 | 6  | 4 | NOT NAMED | 13.7 | 55.5 | 50 | 0    |
| 1948 | 8 | 31 | 12 | 4 | NOT NAMED | 13.8 | 57.0 | 45 | 0    |
| 1948 | 8 | 31 | 18 | 4 | NOT NAMED | 13.9 | 58.1 | 40 | 0    |
| 1948 | 9 | 1  | 0  | 4 | NOT NAMED | 14.0 | 59.3 | 40 | 0    |
| 1948 | 9 | 1  | 6  | 4 | NOT NAMED | 14.1 | 61.2 | 35 | 0    |
| 1948 | 9 | 1  | 12 | 4 | NOT NAMED | 14.2 | 63.0 | 30 | 1007 |
| 1948 | 9 | 1  | 18 | 4 | NOT NAMED | 14.3 | 65.5 | 25 | 0    |
| 1948 | 9 | 1  | 18 | 5 | NOT NAMED | 23.8 | 94.7 | 35 | 0    |
| 1948 | 9 | 2  | 0  | 5 | NOT NAMED | 24.4 | 94.4 | 40 | 0    |
| 1948 | 9 | 2  | 6  | 5 | NOT NAMED | 24.7 | 93.9 | 45 | 0    |
| 1948 | 9 | 2  | 12 | 5 | NOT NAMED | 25.0 | 93.5 | 50 | 0    |
| 1948 | 9 | 2  | 18 | 5 | NOT NAMED | 25.2 | 93.2 | 55 | 0    |
| 1948 | 9 | 3  | 0  | 5 | NOT NAMED | 25.3 | 93.0 | 60 | 0    |
| 1948 | 9 | 3  | 6  | 5 | NOT NAMED | 25.5 | 92.8 | 60 | 0    |
| 1948 | 9 | 3  | 12 | 5 | NOT NAMED | 25.8 | 92.6 | 65 | 0    |
| 1948 | 9 | 3  | 18 | 5 | NOT NAMED | 26.6 | 91.9 | 70 | 0    |
| 1948 | 9 | 4  | 0  | 5 | NOT NAMED | 27.7 | 91.1 | 70 | 990  |
| 1948 | 9 | 4  | 6  | 5 | NOT NAMED | 28.8 | 90.5 | 65 | 989  |
| 1948 | 9 | 4  | 12 | 5 | NOT NAMED | 29.9 | 90.0 | 55 | 0    |
| 1948 | 9 | 4  | 18 | 5 | NOT NAMED | 31.1 | 89.6 | 50 | 0    |
| 1948 | 9 | 5  | 0  | 5 | NOT NAMED | 32.3 | 89.3 | 45 | 0    |

|      |   |    |    |             |      |      |     |   |
|------|---|----|----|-------------|------|------|-----|---|
| 1948 | 9 | 5  | 6  | 5 NOT NAMED | 33.4 | 89.1 | 40  | 0 |
| 1948 | 9 | 5  | 12 | 5 NOT NAMED | 34.5 | 89.0 | 35  | 0 |
| 1948 | 9 | 5  | 18 | 5 NOT NAMED | 35.4 | 89.0 | 30  | 0 |
| 1948 | 9 | 6  | 0  | 5 NOT NAMED | 36.3 | 88.9 | 30  | 0 |
| 1948 | 9 | 6  | 6  | 5 NOT NAMED | 37.3 | 88.7 | 25  | 0 |
| 1948 | 9 | 6  | 12 | 5 NOT NAMED | 39.0 | 88.3 | 25  | 0 |
| 1948 | 9 | 6  | 18 | 5 NOT NAMED | 40.2 | 87.5 | 20  | 0 |
| 1948 | 9 | 7  | 0  | 5 NOT NAMED | 41.3 | 86.4 | 20  | 0 |
| 1948 | 9 | 4  | 6  | 6 NOT NAMED | 14.3 | 19.7 | 50  | 0 |
| 1948 | 9 | 4  | 12 | 6 NOT NAMED | 14.2 | 20.8 | 55  | 0 |
| 1948 | 9 | 4  | 18 | 6 NOT NAMED | 14.2 | 21.8 | 60  | 0 |
| 1948 | 9 | 5  | 0  | 6 NOT NAMED | 14.3 | 23.0 | 65  | 0 |
| 1948 | 9 | 5  | 6  | 6 NOT NAMED | 14.4 | 24.3 | 65  | 0 |
| 1948 | 9 | 5  | 12 | 6 NOT NAMED | 14.5 | 25.5 | 70  | 0 |
| 1948 | 9 | 5  | 18 | 6 NOT NAMED | 14.6 | 26.8 | 70  | 0 |
| 1948 | 9 | 6  | 0  | 6 NOT NAMED | 14.7 | 28.0 | 70  | 0 |
| 1948 | 9 | 6  | 6  | 6 NOT NAMED | 14.9 | 29.1 | 75  | 0 |
| 1948 | 9 | 6  | 12 | 6 NOT NAMED | 15.0 | 30.0 | 75  | 0 |
| 1948 | 9 | 6  | 18 | 6 NOT NAMED | 15.1 | 30.9 | 75  | 0 |
| 1948 | 9 | 7  | 0  | 6 NOT NAMED | 15.1 | 31.8 | 75  | 0 |
| 1948 | 9 | 7  | 6  | 6 NOT NAMED | 15.2 | 32.9 | 80  | 0 |
| 1948 | 9 | 7  | 12 | 6 NOT NAMED | 15.3 | 34.1 | 80  | 0 |
| 1948 | 9 | 7  | 18 | 6 NOT NAMED | 15.4 | 35.4 | 80  | 0 |
| 1948 | 9 | 8  | 0  | 6 NOT NAMED | 15.6 | 36.8 | 80  | 0 |
| 1948 | 9 | 8  | 6  | 6 NOT NAMED | 15.8 | 38.4 | 85  | 0 |
| 1948 | 9 | 8  | 12 | 6 NOT NAMED | 16.0 | 40.0 | 85  | 0 |
| 1948 | 9 | 8  | 18 | 6 NOT NAMED | 16.3 | 41.5 | 85  | 0 |
| 1948 | 9 | 9  | 0  | 6 NOT NAMED | 16.6 | 43.0 | 85  | 0 |
| 1948 | 9 | 9  | 6  | 6 NOT NAMED | 16.9 | 44.5 | 90  | 0 |
| 1948 | 9 | 9  | 12 | 6 NOT NAMED | 17.2 | 46.0 | 90  | 0 |
| 1948 | 9 | 9  | 18 | 6 NOT NAMED | 17.6 | 47.3 | 90  | 0 |
| 1948 | 9 | 10 | 0  | 6 NOT NAMED | 18.0 | 48.5 | 90  | 0 |
| 1948 | 9 | 10 | 6  | 6 NOT NAMED | 18.3 | 49.6 | 95  | 0 |
| 1948 | 9 | 10 | 12 | 6 NOT NAMED | 18.7 | 50.8 | 95  | 0 |
| 1948 | 9 | 10 | 18 | 6 NOT NAMED | 19.4 | 52.3 | 95  | 0 |
| 1948 | 9 | 11 | 0  | 6 NOT NAMED | 20.0 | 53.8 | 100 | 0 |
| 1948 | 9 | 11 | 6  | 6 NOT NAMED | 20.6 | 54.9 | 100 | 0 |
| 1948 | 9 | 11 | 12 | 6 NOT NAMED | 21.3 | 56.1 | 105 | 0 |
| 1948 | 9 | 11 | 18 | 6 NOT NAMED | 22.2 | 58.1 | 105 | 0 |
| 1948 | 9 | 12 | 0  | 6 NOT NAMED | 23.3 | 60.2 | 105 | 0 |
| 1948 | 9 | 12 | 6  | 6 NOT NAMED | 24.2 | 61.6 | 110 | 0 |
| 1948 | 9 | 12 | 12 | 6 NOT NAMED | 25.4 | 62.8 | 110 | 0 |
| 1948 | 9 | 12 | 18 | 6 NOT NAMED | 27.0 | 63.8 | 110 | 0 |
| 1948 | 9 | 13 | 0  | 6 NOT NAMED | 28.7 | 64.6 | 115 | 0 |

|      |      |    |             |      |      |     |     |
|------|------|----|-------------|------|------|-----|-----|
| 1948 | 9 13 | 6  | 6 NOT NAMED | 30.1 | 65.4 | 115 | 0   |
| 1948 | 9 13 | 12 | 6 NOT NAMED | 31.6 | 65.8 | 115 | 0   |
| 1948 | 9 13 | 18 | 6 NOT NAMED | 33.0 | 65.8 | 110 | 0   |
| 1948 | 9 14 | 0  | 6 NOT NAMED | 34.4 | 65.5 | 105 | 0   |
| 1948 | 9 14 | 6  | 6 NOT NAMED | 35.7 | 64.9 | 100 | 0   |
| 1948 | 9 14 | 12 | 6 NOT NAMED | 37.0 | 64.0 | 95  | 0   |
| 1948 | 9 14 | 18 | 6 NOT NAMED | 38.5 | 62.6 | 85  | 0   |
| 1948 | 9 15 | 0  | 6 NOT NAMED | 40.3 | 60.4 | 80  | 0   |
| 1948 | 9 15 | 6  | 6 NOT NAMED | 42.3 | 57.4 | 75  | 0   |
| 1948 | 9 15 | 12 | 6 NOT NAMED | 44.6 | 53.4 | 70  | 0   |
| 1948 | 9 15 | 18 | 6 NOT NAMED | 46.9 | 48.8 | 65  | 0   |
| 1948 | 9 16 | 0  | 6 NOT NAMED | 49.8 | 44.2 | 60  | 0   |
| 1948 | 9 16 | 6  | 6 NOT NAMED | 53.3 | 40.0 | 55  | 0   |
| 1948 | 9 16 | 12 | 6 NOT NAMED | 56.7 | 35.0 | 45  | 0   |
| 1948 | 9 16 | 18 | 6 NOT NAMED | 58.3 | 32.9 | 40  | 0   |
| 1948 | 9 18 | 6  | 7 NOT NAMED | 18.2 | 78.8 | 50  | 0   |
| 1948 | 9 18 | 12 | 7 NOT NAMED | 18.2 | 79.8 | 55  | 0   |
| 1948 | 9 18 | 18 | 7 NOT NAMED | 18.3 | 80.4 | 60  | 0   |
| 1948 | 9 19 | 0  | 7 NOT NAMED | 18.5 | 80.8 | 65  | 0   |
| 1948 | 9 19 | 6  | 7 NOT NAMED | 18.8 | 81.1 | 70  | 0   |
| 1948 | 9 19 | 12 | 7 NOT NAMED | 19.1 | 81.4 | 75  | 0   |
| 1948 | 9 19 | 18 | 7 NOT NAMED | 19.5 | 81.6 | 80  | 0   |
| 1948 | 9 20 | 0  | 7 NOT NAMED | 20.1 | 81.8 | 85  | 0   |
| 1948 | 9 20 | 6  | 7 NOT NAMED | 20.8 | 81.9 | 85  | 0   |
| 1948 | 9 20 | 12 | 7 NOT NAMED | 21.5 | 81.9 | 90  | 0   |
| 1948 | 9 20 | 18 | 7 NOT NAMED | 22.1 | 81.9 | 95  | 0   |
| 1948 | 9 21 | 0  | 7 NOT NAMED | 22.8 | 82.0 | 100 | 0   |
| 1948 | 9 21 | 6  | 7 NOT NAMED | 23.5 | 81.9 | 100 | 0   |
| 1948 | 9 21 | 12 | 7 NOT NAMED | 24.3 | 81.7 | 105 | 0   |
| 1948 | 9 21 | 18 | 7 NOT NAMED | 25.0 | 81.5 | 105 | 963 |
| 1948 | 9 22 | 0  | 7 NOT NAMED | 25.6 | 81.2 | 100 | 0   |
| 1948 | 9 22 | 6  | 7 NOT NAMED | 26.2 | 80.7 | 85  | 0   |
| 1948 | 9 22 | 12 | 7 NOT NAMED | 26.8 | 80.2 | 75  | 964 |
| 1948 | 9 22 | 18 | 7 NOT NAMED | 27.3 | 79.7 | 80  | 965 |
| 1948 | 9 23 | 0  | 7 NOT NAMED | 27.7 | 79.0 | 80  | 0   |
| 1948 | 9 23 | 6  | 7 NOT NAMED | 28.5 | 77.6 | 85  | 0   |
| 1948 | 9 23 | 12 | 7 NOT NAMED | 29.8 | 75.6 | 90  | 0   |
| 1948 | 9 23 | 18 | 7 NOT NAMED | 31.4 | 73.6 | 90  | 0   |
| 1948 | 9 24 | 0  | 7 NOT NAMED | 33.2 | 71.6 | 85  | 0   |
| 1948 | 9 24 | 6  | 7 NOT NAMED | 35.1 | 69.5 | 75  | 0   |
| 1948 | 9 24 | 12 | 7 NOT NAMED | 37.1 | 66.9 | 65  | 0   |
| 1948 | 9 24 | 18 | 7 NOT NAMED | 39.8 | 62.3 | 60  | 0   |
| 1948 | 9 25 | 0  | 7 NOT NAMED | 42.0 | 57.0 | 55  | 0   |
| 1948 | 9 25 | 6  | 7 NOT NAMED | 43.3 | 52.8 | 50  | 0   |

|      |    |    |    |             |      |      |     |     |
|------|----|----|----|-------------|------|------|-----|-----|
| 1948 | 9  | 25 | 12 | 7 NOT NAMED | 44.6 | 48.6 | 45  | 0   |
| 1948 | 9  | 25 | 18 | 7 NOT NAMED | 46.9 | 43.2 | 40  | 0   |
| 1948 | 10 | 3  | 18 | 8 NOT NAMED | 15.3 | 81.8 | 40  | 0   |
| 1948 | 10 | 4  | 0  | 8 NOT NAMED | 16.8 | 83.9 | 50  | 0   |
| 1948 | 10 | 4  | 6  | 8 NOT NAMED | 18.1 | 85.0 | 55  | 0   |
| 1948 | 10 | 4  | 12 | 8 NOT NAMED | 19.4 | 85.1 | 65  | 0   |
| 1948 | 10 | 4  | 18 | 8 NOT NAMED | 20.4 | 84.5 | 75  | 0   |
| 1948 | 10 | 5  | 0  | 8 NOT NAMED | 21.4 | 83.8 | 90  | 0   |
| 1948 | 10 | 5  | 6  | 8 NOT NAMED | 22.2 | 83.3 | 105 | 0   |
| 1948 | 10 | 5  | 12 | 8 NOT NAMED | 23.3 | 82.5 | 115 | 0   |
| 1948 | 10 | 5  | 18 | 8 NOT NAMED | 24.4 | 81.4 | 110 | 975 |
| 1948 | 10 | 6  | 0  | 8 NOT NAMED | 25.7 | 80.1 | 90  | 979 |
| 1948 | 10 | 6  | 6  | 8 NOT NAMED | 26.7 | 78.6 | 85  | 0   |
| 1948 | 10 | 6  | 12 | 8 NOT NAMED | 27.7 | 77.2 | 75  | 0   |
| 1948 | 10 | 6  | 18 | 8 NOT NAMED | 28.7 | 75.6 | 75  | 0   |
| 1948 | 10 | 7  | 0  | 8 NOT NAMED | 29.7 | 73.8 | 80  | 0   |
| 1948 | 10 | 7  | 6  | 8 NOT NAMED | 30.6 | 71.6 | 85  | 0   |
| 1948 | 10 | 7  | 12 | 8 NOT NAMED | 31.4 | 69.0 | 90  | 0   |
| 1948 | 10 | 7  | 18 | 8 NOT NAMED | 31.9 | 66.0 | 90  | 0   |
| 1948 | 10 | 8  | 0  | 8 NOT NAMED | 32.2 | 63.0 | 85  | 0   |
| 1948 | 10 | 8  | 6  | 8 NOT NAMED | 32.5 | 60.1 | 80  | 0   |
| 1948 | 10 | 8  | 12 | 8 NOT NAMED | 32.7 | 57.2 | 75  | 0   |
| 1948 | 10 | 8  | 18 | 8 NOT NAMED | 32.5 | 54.3 | 70  | 0   |
| 1948 | 10 | 9  | 0  | 8 NOT NAMED | 32.2 | 51.3 | 70  | 0   |
| 1948 | 10 | 9  | 6  | 8 NOT NAMED | 32.0 | 48.5 | 60  | 0   |
| 1948 | 10 | 9  | 12 | 8 NOT NAMED | 31.9 | 46.3 | 60  | 0   |
| 1948 | 10 | 9  | 18 | 8 NOT NAMED | 31.9 | 44.7 | 60  | 0   |
| 1948 | 10 | 10 | 0  | 8 NOT NAMED | 31.9 | 43.3 | 60  | 0   |
| 1948 | 10 | 10 | 6  | 8 NOT NAMED | 32.0 | 42.0 | 55  | 0   |
| 1948 | 10 | 10 | 12 | 8 NOT NAMED | 32.1 | 40.8 | 55  | 0   |
| 1948 | 10 | 10 | 18 | 8 NOT NAMED | 32.1 | 40.0 | 50  | 0   |
| 1948 | 10 | 11 | 0  | 8 NOT NAMED | 32.0 | 39.3 | 50  | 0   |
| 1948 | 10 | 11 | 6  | 8 NOT NAMED | 31.8 | 38.7 | 50  | 0   |
| 1948 | 10 | 11 | 12 | 8 NOT NAMED | 31.5 | 38.2 | 45  | 0   |
| 1948 | 10 | 11 | 18 | 8 NOT NAMED | 31.0 | 38.0 | 45  | 0   |
| 1948 | 10 | 12 | 0  | 8 NOT NAMED | 30.6 | 38.2 | 45  | 0   |
| 1948 | 10 | 12 | 6  | 8 NOT NAMED | 30.3 | 38.5 | 45  | 0   |
| 1948 | 10 | 12 | 12 | 8 NOT NAMED | 30.2 | 39.0 | 45  | 0   |
| 1948 | 10 | 12 | 18 | 8 NOT NAMED | 30.2 | 39.6 | 40  | 0   |
| 1948 | 10 | 13 | 0  | 8 NOT NAMED | 30.2 | 40.3 | 40  | 0   |
| 1948 | 10 | 13 | 6  | 8 NOT NAMED | 30.2 | 40.7 | 40  | 0   |
| 1948 | 10 | 13 | 12 | 8 NOT NAMED | 30.3 | 41.3 | 40  | 0   |
| 1948 | 10 | 13 | 18 | 8 NOT NAMED | 30.5 | 42.6 | 40  | 0   |
| 1948 | 10 | 14 | 0  | 8 NOT NAMED | 30.9 | 43.9 | 40  | 0   |

|      |    |    |    |             |      |      |    |     |
|------|----|----|----|-------------|------|------|----|-----|
| 1948 | 10 | 14 | 6  | 8 NOT NAMED | 31.6 | 45.2 | 40 | 0   |
| 1948 | 10 | 14 | 12 | 8 NOT NAMED | 32.6 | 46.4 | 40 | 0   |
| 1948 | 10 | 14 | 18 | 8 NOT NAMED | 33.7 | 47.2 | 40 | 0   |
| 1948 | 10 | 15 | 0  | 8 NOT NAMED | 34.8 | 47.8 | 40 | 0   |
| 1948 | 10 | 15 | 6  | 8 NOT NAMED | 35.7 | 48.0 | 40 | 0   |
| 1948 | 10 | 15 | 12 | 8 NOT NAMED | 36.7 | 48.0 | 40 | 0   |
| 1948 | 10 | 15 | 18 | 8 NOT NAMED | 38.5 | 47.9 | 35 | 0   |
| 1948 | 10 | 16 | 0  | 8 NOT NAMED | 41.5 | 46.6 | 35 | 0   |
| 1948 | 11 | 8  | 18 | 9 NOT NAMED | 24.6 | 63.3 | 60 | 0   |
| 1948 | 11 | 9  | 0  | 9 NOT NAMED | 25.4 | 66.8 | 60 | 0   |
| 1948 | 11 | 9  | 6  | 9 NOT NAMED | 25.9 | 68.8 | 65 | 0   |
| 1948 | 11 | 9  | 12 | 9 NOT NAMED | 26.3 | 70.8 | 70 | 0   |
| 1948 | 11 | 9  | 18 | 9 NOT NAMED | 27.3 | 72.4 | 70 | 0   |
| 1948 | 11 | 10 | 0  | 9 NOT NAMED | 28.8 | 73.6 | 70 | 0   |
| 1948 | 11 | 10 | 6  | 9 NOT NAMED | 30.1 | 74.4 | 65 | 0   |
| 1948 | 11 | 10 | 12 | 9 NOT NAMED | 31.4 | 74.7 | 60 | 0   |
| 1948 | 11 | 10 | 18 | 9 NOT NAMED | 33.1 | 74.5 | 60 | 0   |
| 1948 | 11 | 11 | 0  | 9 NOT NAMED | 35.2 | 73.9 | 55 | 0   |
| 1948 | 11 | 11 | 6  | 9 NOT NAMED | 36.8 | 72.5 | 50 | 0   |
| 1949 | 8  | 21 | 6  | 1 NOT NAMED | 21.3 | 62.6 | 60 | 0   |
| 1949 | 8  | 21 | 12 | 1 NOT NAMED | 22.3 | 64.7 | 65 | 0   |
| 1949 | 8  | 21 | 18 | 1 NOT NAMED | 23.2 | 66.3 | 70 | 0   |
| 1949 | 8  | 22 | 0  | 1 NOT NAMED | 24.3 | 67.8 | 75 | 0   |
| 1949 | 8  | 22 | 6  | 1 NOT NAMED | 24.9 | 69.3 | 80 | 0   |
| 1949 | 8  | 22 | 12 | 1 NOT NAMED | 25.4 | 70.7 | 85 | 0   |
| 1949 | 8  | 22 | 18 | 1 NOT NAMED | 26.0 | 72.3 | 85 | 0   |
| 1949 | 8  | 23 | 0  | 1 NOT NAMED | 26.5 | 73.9 | 85 | 0   |
| 1949 | 8  | 23 | 6  | 1 NOT NAMED | 27.4 | 75.2 | 85 | 0   |
| 1949 | 8  | 23 | 12 | 1 NOT NAMED | 28.6 | 75.9 | 90 | 0   |
| 1949 | 8  | 23 | 18 | 1 NOT NAMED | 29.7 | 76.2 | 90 | 0   |
| 1949 | 8  | 24 | 0  | 1 NOT NAMED | 30.9 | 76.2 | 95 | 0   |
| 1949 | 8  | 24 | 6  | 1 NOT NAMED | 32.6 | 76.0 | 95 | 0   |
| 1949 | 8  | 24 | 12 | 1 NOT NAMED | 34.3 | 75.7 | 95 | 977 |
| 1949 | 8  | 24 | 18 | 1 NOT NAMED | 35.5 | 74.5 | 95 | 0   |
| 1949 | 8  | 25 | 0  | 1 NOT NAMED | 36.5 | 72.9 | 90 | 0   |
| 1949 | 8  | 25 | 6  | 1 NOT NAMED | 37.6 | 68.5 | 85 | 0   |
| 1949 | 8  | 25 | 12 | 1 NOT NAMED | 37.8 | 64.2 | 75 | 0   |
| 1949 | 8  | 25 | 18 | 1 NOT NAMED | 38.5 | 59.8 | 65 | 0   |
| 1949 | 8  | 26 | 0  | 1 NOT NAMED | 40.2 | 55.5 | 65 | 0   |
| 1949 | 8  | 26 | 6  | 1 NOT NAMED | 42.2 | 51.9 | 65 | 0   |
| 1949 | 8  | 26 | 12 | 1 NOT NAMED | 44.2 | 49.3 | 65 | 0   |
| 1949 | 8  | 26 | 18 | 1 NOT NAMED | 46.0 | 47.0 | 60 | 0   |
| 1949 | 8  | 27 | 0  | 1 NOT NAMED | 47.7 | 44.7 | 60 | 0   |
| 1949 | 8  | 27 | 6  | 1 NOT NAMED | 49.5 | 42.3 | 60 | 0   |

|      |         |             |      |      |     |      |
|------|---------|-------------|------|------|-----|------|
| 1949 | 8 27 12 | 1 NOT NAMED | 51.2 | 40.0 | 60  | 0    |
| 1949 | 8 27 18 | 1 NOT NAMED | 53.0 | 37.6 | 55  | 0    |
| 1949 | 8 28 0  | 1 NOT NAMED | 54.7 | 35.3 | 50  | 0    |
| 1949 | 8 28 6  | 1 NOT NAMED | 56.5 | 32.6 | 45  | 0    |
| 1949 | 8 28 12 | 1 NOT NAMED | 58.4 | 30.0 | 45  | 0    |
| 1949 | 8 28 18 | 1 NOT NAMED | 60.0 | 27.4 | 40  | 0    |
| 1949 | 8 23 6  | 2 NOT NAMED | 18.2 | 60.0 | 50  | 0    |
| 1949 | 8 23 12 | 2 NOT NAMED | 18.4 | 62.0 | 50  | 0    |
| 1949 | 8 23 18 | 2 NOT NAMED | 18.6 | 63.1 | 50  | 0    |
| 1949 | 8 24 0  | 2 NOT NAMED | 18.9 | 64.3 | 55  | 0    |
| 1949 | 8 24 6  | 2 NOT NAMED | 19.4 | 65.6 | 55  | 0    |
| 1949 | 8 24 12 | 2 NOT NAMED | 20.0 | 66.9 | 55  | 0    |
| 1949 | 8 24 18 | 2 NOT NAMED | 20.7 | 68.1 | 60  | 0    |
| 1949 | 8 25 0  | 2 NOT NAMED | 21.4 | 69.3 | 60  | 0    |
| 1949 | 8 25 6  | 2 NOT NAMED | 22.7 | 71.1 | 60  | 0    |
| 1949 | 8 25 12 | 2 NOT NAMED | 23.4 | 73.0 | 65  | 0    |
| 1949 | 8 25 18 | 2 NOT NAMED | 23.7 | 74.0 | 70  | 0    |
| 1949 | 8 26 0  | 2 NOT NAMED | 24.0 | 75.0 | 85  | 0    |
| 1949 | 8 26 6  | 2 NOT NAMED | 24.6 | 76.4 | 100 | 0    |
| 1949 | 8 26 12 | 2 NOT NAMED | 25.2 | 77.8 | 115 | 0    |
| 1949 | 8 26 18 | 2 NOT NAMED | 26.1 | 79.0 | 130 | 0    |
| 1949 | 8 27 0  | 2 NOT NAMED | 26.8 | 80.1 | 130 | 954  |
| 1949 | 8 27 6  | 2 NOT NAMED | 27.6 | 81.2 | 100 | 965  |
| 1949 | 8 27 12 | 2 NOT NAMED | 28.3 | 82.2 | 65  | 974  |
| 1949 | 8 27 18 | 2 NOT NAMED | 29.3 | 82.7 | 55  | 982  |
| 1949 | 8 28 0  | 2 NOT NAMED | 30.3 | 82.9 | 50  | 987  |
| 1949 | 8 28 6  | 2 NOT NAMED | 31.5 | 82.9 | 45  | 992  |
| 1949 | 8 28 12 | 2 NOT NAMED | 33.0 | 82.7 | 40  | 996  |
| 1949 | 8 28 18 | 2 NOT NAMED | 34.6 | 82.0 | 40  | 1000 |
| 1949 | 8 29 0  | 2 NOT NAMED | 36.4 | 80.8 | 40  | 1002 |
| 1949 | 8 29 6  | 2 NOT NAMED | 38.4 | 78.9 | 40  | 1000 |
| 1949 | 8 29 12 | 2 NOT NAMED | 40.8 | 76.1 | 35  | 1000 |
| 1949 | 8 29 18 | 2 NOT NAMED | 43.8 | 71.9 | 35  | 0    |
| 1949 | 8 30 0  | 2 NOT NAMED | 47.2 | 67.6 | 35  | 0    |
| 1949 | 8 30 6  | 2 NOT NAMED | 49.9 | 65.3 | 30  | 0    |
| 1949 | 8 30 12 | 2 NOT NAMED | 52.2 | 62.8 | 30  | 0    |
| 1949 | 8 30 18 | 2 NOT NAMED | 54.1 | 58.7 | 30  | 0    |
| 1949 | 8 31 0  | 2 NOT NAMED | 54.8 | 54.7 | 25  | 0    |
| 1949 | 8 31 6  | 2 NOT NAMED | 54.8 | 51.0 | 25  | 0    |
| 1949 | 8 31 12 | 2 NOT NAMED | 54.9 | 47.2 | 25  | 0    |
| 1949 | 8 31 18 | 2 NOT NAMED | 54.7 | 43.6 | 25  | 0    |
| 1949 | 8 30 18 | 3 NOT NAMED | 11.9 | 55.8 | 35  | 0    |
| 1949 | 8 31 0  | 3 NOT NAMED | 12.2 | 56.9 | 40  | 0    |
| 1949 | 8 31 6  | 3 NOT NAMED | 12.4 | 57.7 | 45  | 0    |



|      |   |    |    |             |      |      |     |   |
|------|---|----|----|-------------|------|------|-----|---|
| 1949 | 8 | 31 | 12 | 3 NOT NAMED | 12.7 | 58.7 | 45  | 0 |
| 1949 | 8 | 31 | 18 | 3 NOT NAMED | 12.9 | 59.4 | 45  | 0 |
| 1949 | 9 | 1  | 0  | 3 NOT NAMED | 13.4 | 60.5 | 45  | 0 |
| 1949 | 9 | 1  | 6  | 3 NOT NAMED | 13.8 | 61.3 | 45  | 0 |
| 1949 | 9 | 1  | 12 | 3 NOT NAMED | 14.2 | 62.0 | 40  | 0 |
| 1949 | 9 | 1  | 18 | 3 NOT NAMED | 14.7 | 63.2 | 40  | 0 |
| 1949 | 9 | 2  | 0  | 3 NOT NAMED | 15.0 | 64.4 | 40  | 0 |
| 1949 | 9 | 2  | 6  | 3 NOT NAMED | 15.2 | 65.1 | 35  | 0 |
| 1949 | 9 | 2  | 12 | 3 NOT NAMED | 15.3 | 65.7 | 35  | 0 |
| 1949 | 9 | 2  | 18 | 3 NOT NAMED | 15.3 | 66.6 | 30  | 0 |
| 1949 | 9 | 3  | 0  | 3 NOT NAMED | 15.3 | 67.7 | 25  | 0 |
| 1949 | 9 | 3  | 6  | 3 NOT NAMED | 15.3 | 68.4 | 25  | 0 |
| 1949 | 9 | 3  | 6  | 4 NOT NAMED | 18.4 | 65.0 | 35  | 0 |
| 1949 | 9 | 3  | 12 | 4 NOT NAMED | 19.5 | 66.3 | 55  | 0 |
| 1949 | 9 | 3  | 18 | 4 NOT NAMED | 20.9 | 66.6 | 65  | 0 |
| 1949 | 9 | 4  | 0  | 4 NOT NAMED | 22.0 | 66.8 | 70  | 0 |
| 1949 | 9 | 4  | 6  | 4 NOT NAMED | 22.8 | 66.9 | 75  | 0 |
| 1949 | 9 | 4  | 12 | 4 NOT NAMED | 23.5 | 67.0 | 80  | 0 |
| 1949 | 9 | 4  | 18 | 4 NOT NAMED | 24.3 | 67.0 | 80  | 0 |
| 1949 | 9 | 5  | 0  | 4 NOT NAMED | 25.1 | 67.0 | 85  | 0 |
| 1949 | 9 | 5  | 6  | 4 NOT NAMED | 25.6 | 66.9 | 90  | 0 |
| 1949 | 9 | 5  | 12 | 4 NOT NAMED | 25.8 | 66.7 | 95  | 0 |
| 1949 | 9 | 5  | 18 | 4 NOT NAMED | 25.9 | 66.2 | 95  | 0 |
| 1949 | 9 | 6  | 0  | 4 NOT NAMED | 26.0 | 65.7 | 100 | 0 |
| 1949 | 9 | 6  | 6  | 4 NOT NAMED | 26.0 | 65.3 | 105 | 0 |
| 1949 | 9 | 6  | 12 | 4 NOT NAMED | 26.1 | 65.0 | 105 | 0 |
| 1949 | 9 | 6  | 18 | 4 NOT NAMED | 26.3 | 64.8 | 105 | 0 |
| 1949 | 9 | 7  | 0  | 4 NOT NAMED | 26.5 | 64.6 | 100 | 0 |
| 1949 | 9 | 7  | 6  | 4 NOT NAMED | 26.7 | 64.5 | 100 | 0 |
| 1949 | 9 | 7  | 12 | 4 NOT NAMED | 27.2 | 64.4 | 95  | 0 |
| 1949 | 9 | 7  | 18 | 4 NOT NAMED | 28.4 | 64.2 | 100 | 0 |
| 1949 | 9 | 8  | 0  | 4 NOT NAMED | 29.7 | 64.0 | 100 | 0 |
| 1949 | 9 | 8  | 6  | 4 NOT NAMED | 30.7 | 63.8 | 105 | 0 |
| 1949 | 9 | 8  | 12 | 4 NOT NAMED | 31.7 | 63.5 | 110 | 0 |
| 1949 | 9 | 8  | 18 | 4 NOT NAMED | 33.0 | 63.0 | 110 | 0 |
| 1949 | 9 | 9  | 0  | 4 NOT NAMED | 34.4 | 62.1 | 110 | 0 |
| 1949 | 9 | 9  | 6  | 4 NOT NAMED | 36.0 | 61.0 | 105 | 0 |
| 1949 | 9 | 9  | 12 | 4 NOT NAMED | 37.8 | 59.8 | 95  | 0 |
| 1949 | 9 | 9  | 18 | 4 NOT NAMED | 39.9 | 58.7 | 85  | 0 |
| 1949 | 9 | 10 | 0  | 4 NOT NAMED | 42.4 | 57.2 | 75  | 0 |
| 1949 | 9 | 10 | 6  | 4 NOT NAMED | 45.5 | 55.1 | 65  | 0 |
| 1949 | 9 | 10 | 12 | 4 NOT NAMED | 48.9 | 53.0 | 60  | 0 |
| 1949 | 9 | 10 | 18 | 4 NOT NAMED | 53.3 | 50.9 | 55  | 0 |
| 1949 | 9 | 11 | 0  | 4 NOT NAMED | 56.8 | 48.8 | 50  | 0 |

|      |   |    |    |   |           |      |      |    |      |
|------|---|----|----|---|-----------|------|------|----|------|
| 1949 | 9 | 11 | 6  | 4 | NOT NAMED | 58.7 | 47.7 | 45 | 0    |
| 1949 | 9 | 11 | 12 | 4 | NOT NAMED | 60.5 | 47.2 | 45 | 0    |
| 1949 | 9 | 3  | 6  | 5 | NOT NAMED | 23.7 | 89.0 | 40 | 0    |
| 1949 | 9 | 3  | 12 | 5 | NOT NAMED | 24.2 | 89.0 | 40 | 0    |
| 1949 | 9 | 3  | 18 | 5 | NOT NAMED | 24.8 | 89.3 | 40 | 0    |
| 1949 | 9 | 4  | 0  | 5 | NOT NAMED | 25.9 | 89.6 | 40 | 0    |
| 1949 | 9 | 4  | 6  | 5 | NOT NAMED | 27.6 | 90.1 | 40 | 0    |
| 1949 | 9 | 4  | 12 | 5 | NOT NAMED | 29.3 | 90.6 | 40 | 1008 |
| 1949 | 9 | 4  | 18 | 5 | NOT NAMED | 30.3 | 90.8 | 40 | 0    |
| 1949 | 9 | 5  | 0  | 5 | NOT NAMED | 31.3 | 90.6 | 40 | 0    |
| 1949 | 9 | 5  | 6  | 5 | NOT NAMED | 32.5 | 90.1 | 40 | 0    |
| 1949 | 9 | 5  | 12 | 5 | NOT NAMED | 33.7 | 89.1 | 35 | 0    |
| 1949 | 9 | 5  | 18 | 5 | NOT NAMED | 35.7 | 87.9 | 30 | 0    |
| 1949 | 9 | 5  | 6  | 6 | NOT NAMED | 27.3 | 40.4 | 35 | 0    |
| 1949 | 9 | 5  | 12 | 6 | NOT NAMED | 28.3 | 41.2 | 35 | 0    |
| 1949 | 9 | 5  | 18 | 6 | NOT NAMED | 29.2 | 42.1 | 35 | 0    |
| 1949 | 9 | 6  | 0  | 6 | NOT NAMED | 30.2 | 43.0 | 40 | 0    |
| 1949 | 9 | 6  | 6  | 6 | NOT NAMED | 31.6 | 44.2 | 40 | 0    |
| 1949 | 9 | 6  | 12 | 6 | NOT NAMED | 32.9 | 44.7 | 40 | 0    |
| 1949 | 9 | 6  | 18 | 6 | NOT NAMED | 33.7 | 44.7 | 40 | 0    |
| 1949 | 9 | 7  | 0  | 6 | NOT NAMED | 34.4 | 44.4 | 40 | 0    |
| 1949 | 9 | 7  | 6  | 6 | NOT NAMED | 35.0 | 43.8 | 40 | 0    |
| 1949 | 9 | 7  | 12 | 6 | NOT NAMED | 35.5 | 43.2 | 40 | 0    |
| 1949 | 9 | 7  | 18 | 6 | NOT NAMED | 35.8 | 42.6 | 40 | 0    |
| 1949 | 9 | 8  | 0  | 6 | NOT NAMED | 36.0 | 42.0 | 40 | 0    |
| 1949 | 9 | 8  | 6  | 6 | NOT NAMED | 36.1 | 41.5 | 40 | 0    |
| 1949 | 9 | 8  | 12 | 6 | NOT NAMED | 36.0 | 41.0 | 40 | 0    |
| 1949 | 9 | 8  | 18 | 6 | NOT NAMED | 35.5 | 40.7 | 40 | 0    |
| 1949 | 9 | 9  | 0  | 6 | NOT NAMED | 34.8 | 40.7 | 40 | 0    |
| 1949 | 9 | 9  | 6  | 6 | NOT NAMED | 34.1 | 41.9 | 40 | 0    |
| 1949 | 9 | 9  | 12 | 6 | NOT NAMED | 34.4 | 43.3 | 40 | 0    |
| 1949 | 9 | 9  | 18 | 6 | NOT NAMED | 34.8 | 43.8 | 40 | 0    |
| 1949 | 9 | 10 | 0  | 6 | NOT NAMED | 35.2 | 44.2 | 40 | 0    |
| 1949 | 9 | 10 | 6  | 6 | NOT NAMED | 35.5 | 44.5 | 40 | 0    |
| 1949 | 9 | 10 | 12 | 6 | NOT NAMED | 35.9 | 44.7 | 40 | 0    |
| 1949 | 9 | 10 | 18 | 6 | NOT NAMED | 36.7 | 44.8 | 40 | 0    |
| 1949 | 9 | 11 | 0  | 6 | NOT NAMED | 37.5 | 44.6 | 40 | 0    |
| 1949 | 9 | 11 | 6  | 6 | NOT NAMED | 38.3 | 44.2 | 40 | 0    |
| 1949 | 9 | 11 | 12 | 6 | NOT NAMED | 39.0 | 43.8 | 40 | 0    |
| 1949 | 9 | 11 | 18 | 6 | NOT NAMED | 41.6 | 42.0 | 40 | 0    |
| 1949 | 9 | 13 | 6  | 7 | NOT NAMED | 15.5 | 33.7 | 35 | 0    |
| 1949 | 9 | 13 | 12 | 7 | NOT NAMED | 17.0 | 33.1 | 35 | 0    |
| 1949 | 9 | 13 | 18 | 7 | NOT NAMED | 17.8 | 32.9 | 35 | 0    |
| 1949 | 9 | 14 | 0  | 7 | NOT NAMED | 18.8 | 32.6 | 40 | 0    |

|      |      |    |             |      |      |    |   |
|------|------|----|-------------|------|------|----|---|
| 1949 | 9 14 | 6  | 7 NOT NAMED | 20.0 | 32.3 | 40 | 0 |
| 1949 | 9 14 | 12 | 7 NOT NAMED | 21.1 | 32.0 | 45 | 0 |
| 1949 | 9 14 | 18 | 7 NOT NAMED | 22.0 | 31.9 | 45 | 0 |
| 1949 | 9 15 | 0  | 7 NOT NAMED | 22.9 | 31.8 | 45 | 0 |
| 1949 | 9 15 | 6  | 7 NOT NAMED | 23.7 | 31.7 | 50 | 0 |
| 1949 | 9 15 | 12 | 7 NOT NAMED | 24.5 | 31.5 | 50 | 0 |
| 1949 | 9 15 | 18 | 7 NOT NAMED | 25.4 | 31.3 | 50 | 0 |
| 1949 | 9 16 | 0  | 7 NOT NAMED | 26.4 | 31.0 | 45 | 0 |
| 1949 | 9 16 | 6  | 7 NOT NAMED | 27.6 | 30.6 | 40 | 0 |
| 1949 | 9 16 | 12 | 7 NOT NAMED | 28.7 | 30.1 | 40 | 0 |
| 1949 | 9 16 | 18 | 7 NOT NAMED | 29.4 | 29.8 | 35 | 0 |
| 1949 | 9 17 | 0  | 7 NOT NAMED | 30.0 | 29.7 | 30 | 0 |
| 1949 | 9 17 | 6  | 7 NOT NAMED | 30.5 | 29.7 | 30 | 0 |
| 1949 | 9 17 | 12 | 7 NOT NAMED | 31.0 | 29.7 | 25 | 0 |
| 1949 | 9 17 | 18 | 7 NOT NAMED | 31.5 | 29.7 | 25 | 0 |
| 1949 | 9 20 | 12 | 8 NOT NAMED | 26.0 | 92.0 | 35 | 0 |
| 1949 | 9 20 | 18 | 8 NOT NAMED | 26.6 | 92.3 | 35 | 0 |
| 1949 | 9 21 | 0  | 8 NOT NAMED | 26.9 | 93.0 | 40 | 0 |
| 1949 | 9 21 | 6  | 8 NOT NAMED | 26.8 | 93.3 | 40 | 0 |
| 1949 | 9 21 | 12 | 8 NOT NAMED | 26.6 | 93.5 | 45 | 0 |
| 1949 | 9 21 | 18 | 8 NOT NAMED | 26.3 | 94.0 | 45 | 0 |
| 1949 | 9 22 | 0  | 8 NOT NAMED | 26.0 | 95.0 | 50 | 0 |
| 1949 | 9 22 | 6  | 8 NOT NAMED | 26.7 | 95.2 | 50 | 0 |
| 1949 | 9 22 | 12 | 8 NOT NAMED | 27.1 | 94.1 | 55 | 0 |
| 1949 | 9 22 | 18 | 8 NOT NAMED | 26.3 | 94.0 | 55 | 0 |
| 1949 | 9 23 | 0  | 8 NOT NAMED | 25.5 | 94.0 | 60 | 0 |
| 1949 | 9 23 | 6  | 8 NOT NAMED | 24.8 | 94.3 | 60 | 0 |
| 1949 | 9 23 | 12 | 8 NOT NAMED | 24.0 | 94.6 | 60 | 0 |
| 1949 | 9 23 | 18 | 8 NOT NAMED | 23.0 | 94.9 | 70 | 0 |
| 1949 | 9 24 | 0  | 8 NOT NAMED | 22.2 | 95.2 | 75 | 0 |
| 1949 | 9 24 | 6  | 8 NOT NAMED | 22.0 | 95.5 | 80 | 0 |
| 1949 | 9 24 | 12 | 8 NOT NAMED | 21.9 | 95.9 | 85 | 0 |
| 1949 | 9 24 | 18 | 8 NOT NAMED | 21.7 | 96.1 | 85 | 0 |
| 1949 | 9 25 | 0  | 8 NOT NAMED | 21.6 | 96.1 | 85 | 0 |
| 1949 | 9 25 | 6  | 8 NOT NAMED | 21.4 | 96.1 | 80 | 0 |
| 1949 | 9 25 | 12 | 8 NOT NAMED | 21.0 | 96.0 | 80 | 0 |
| 1949 | 9 25 | 18 | 8 NOT NAMED | 20.6 | 95.8 | 75 | 0 |
| 1949 | 9 26 | 0  | 8 NOT NAMED | 20.3 | 95.8 | 65 | 0 |
| 1949 | 9 26 | 6  | 8 NOT NAMED | 19.7 | 95.9 | 55 | 0 |
| 1949 | 9 26 | 12 | 8 NOT NAMED | 18.8 | 96.2 | 35 | 0 |
| 1949 | 9 26 | 18 | 8 NOT NAMED | 18.1 | 96.5 | 20 | 0 |
| 1949 | 9 21 | 6  | 9 NOT NAMED | 16.2 | 62.5 | 60 | 0 |
| 1949 | 9 21 | 12 | 9 NOT NAMED | 16.4 | 65.3 | 65 | 0 |
| 1949 | 9 21 | 18 | 9 NOT NAMED | 16.9 | 66.6 | 70 | 0 |

|      |    |    |    |    |           |      |      |     |   |
|------|----|----|----|----|-----------|------|------|-----|---|
| 1949 | 9  | 22 | 0  | 9  | NOT NAMED | 17.3 | 67.8 | 70  | 0 |
| 1949 | 9  | 22 | 6  | 9  | NOT NAMED | 17.8 | 68.8 | 70  | 0 |
| 1949 | 9  | 22 | 12 | 9  | NOT NAMED | 18.2 | 69.9 | 65  | 0 |
| 1949 | 9  | 22 | 18 | 9  | NOT NAMED | 18.5 | 72.0 | 35  | 0 |
| 1949 | 9  | 27 | 6  | 10 | NOT NAMED | 12.5 | 89.5 | 35  | 0 |
| 1949 | 9  | 27 | 12 | 10 | NOT NAMED | 13.3 | 90.1 | 35  | 0 |
| 1949 | 9  | 27 | 18 | 10 | NOT NAMED | 13.4 | 90.2 | 35  | 0 |
| 1949 | 9  | 28 | 0  | 10 | NOT NAMED | 13.5 | 90.2 | 35  | 0 |
| 1949 | 9  | 28 | 6  | 10 | NOT NAMED | 13.7 | 90.2 | 35  | 0 |
| 1949 | 9  | 28 | 12 | 10 | NOT NAMED | 14.0 | 90.2 | 35  | 0 |
| 1949 | 9  | 28 | 18 | 10 | NOT NAMED | 14.2 | 90.3 | 35  | 0 |
| 1949 | 9  | 29 | 0  | 10 | NOT NAMED | 14.4 | 90.5 | 35  | 0 |
| 1949 | 9  | 29 | 6  | 10 | NOT NAMED | 14.6 | 90.7 | 35  | 0 |
| 1949 | 9  | 29 | 12 | 10 | NOT NAMED | 15.0 | 91.1 | 35  | 0 |
| 1949 | 9  | 29 | 18 | 10 | NOT NAMED | 15.6 | 90.9 | 35  | 0 |
| 1949 | 9  | 30 | 0  | 10 | NOT NAMED | 16.3 | 90.9 | 35  | 0 |
| 1949 | 9  | 30 | 6  | 10 | NOT NAMED | 16.8 | 90.8 | 35  | 0 |
| 1949 | 9  | 30 | 12 | 10 | NOT NAMED | 17.3 | 90.6 | 40  | 0 |
| 1949 | 9  | 30 | 18 | 10 | NOT NAMED | 17.9 | 90.5 | 40  | 0 |
| 1949 | 10 | 1  | 0  | 10 | NOT NAMED | 18.5 | 90.5 | 40  | 0 |
| 1949 | 10 | 1  | 6  | 10 | NOT NAMED | 18.8 | 90.7 | 45  | 0 |
| 1949 | 10 | 1  | 12 | 10 | NOT NAMED | 19.1 | 91.2 | 45  | 0 |
| 1949 | 10 | 1  | 18 | 10 | NOT NAMED | 19.5 | 91.8 | 50  | 0 |
| 1949 | 10 | 2  | 0  | 10 | NOT NAMED | 20.0 | 92.5 | 50  | 0 |
| 1949 | 10 | 2  | 6  | 10 | NOT NAMED | 20.6 | 93.2 | 55  | 0 |
| 1949 | 10 | 2  | 12 | 10 | NOT NAMED | 21.3 | 93.8 | 60  | 0 |
| 1949 | 10 | 2  | 18 | 10 | NOT NAMED | 22.0 | 94.3 | 65  | 0 |
| 1949 | 10 | 3  | 0  | 10 | NOT NAMED | 22.7 | 94.6 | 75  | 0 |
| 1949 | 10 | 3  | 6  | 10 | NOT NAMED | 23.5 | 94.9 | 85  | 0 |
| 1949 | 10 | 3  | 12 | 10 | NOT NAMED | 24.5 | 95.2 | 95  | 0 |
| 1949 | 10 | 3  | 18 | 10 | NOT NAMED | 26.0 | 95.5 | 100 | 0 |
| 1949 | 10 | 4  | 0  | 10 | NOT NAMED | 27.6 | 95.6 | 110 | 0 |
| 1949 | 10 | 4  | 6  | 10 | NOT NAMED | 29.1 | 95.4 | 115 | 0 |
| 1949 | 10 | 4  | 12 | 10 | NOT NAMED | 30.3 | 95.0 | 60  | 0 |
| 1949 | 10 | 4  | 18 | 10 | NOT NAMED | 31.0 | 94.6 | 55  | 0 |
| 1949 | 10 | 5  | 0  | 10 | NOT NAMED | 31.6 | 94.1 | 50  | 0 |
| 1949 | 10 | 5  | 6  | 10 | NOT NAMED | 32.3 | 93.6 | 45  | 0 |
| 1949 | 10 | 5  | 12 | 10 | NOT NAMED | 33.0 | 93.1 | 40  | 0 |
| 1949 | 10 | 5  | 18 | 10 | NOT NAMED | 33.9 | 92.5 | 35  | 0 |
| 1949 | 10 | 6  | 0  | 10 | NOT NAMED | 35.4 | 91.7 | 35  | 0 |
| 1949 | 10 | 6  | 6  | 10 | NOT NAMED | 37.5 | 90.7 | 30  | 0 |
| 1949 | 10 | 6  | 12 | 10 | NOT NAMED | 39.6 | 89.6 | 30  | 0 |
| 1949 | 10 | 6  | 18 | 10 | NOT NAMED | 42.2 | 88.4 | 25  | 0 |
| 1949 | 10 | 12 | 12 | 11 | NOT NAMED | 18.1 | 78.6 | 35  | 0 |

|                            |      |      |    |   |
|----------------------------|------|------|----|---|
| 1949 10 12 18 11 NOT NAMED | 18.9 | 76.9 | 35 | 0 |
| 1949 10 13 0 11 NOT NAMED  | 19.8 | 75.6 | 35 | 0 |
| 1949 10 13 6 11 NOT NAMED  | 20.6 | 74.5 | 40 | 0 |
| 1949 10 13 12 11 NOT NAMED | 21.5 | 73.8 | 45 | 0 |
| 1949 10 13 18 11 NOT NAMED | 22.2 | 73.3 | 50 | 0 |
| 1949 10 14 0 11 NOT NAMED  | 22.9 | 72.8 | 55 | 0 |
| 1949 10 14 6 11 NOT NAMED  | 23.5 | 72.3 | 60 | 0 |
| 1949 10 14 12 11 NOT NAMED | 24.2 | 71.9 | 65 | 0 |
| 1949 10 14 18 11 NOT NAMED | 25.0 | 71.4 | 70 | 0 |
| 1949 10 15 0 11 NOT NAMED  | 25.9 | 71.0 | 75 | 0 |
| 1949 10 15 6 11 NOT NAMED  | 26.8 | 70.5 | 75 | 0 |
| 1949 10 15 12 11 NOT NAMED | 27.6 | 70.0 | 80 | 0 |
| 1949 10 15 18 11 NOT NAMED | 28.9 | 69.4 | 85 | 0 |
| 1949 10 16 0 11 NOT NAMED  | 30.6 | 68.8 | 85 | 0 |
| 1949 10 16 6 11 NOT NAMED  | 32.4 | 68.3 | 90 | 0 |
| 1949 10 16 12 11 NOT NAMED | 34.1 | 67.7 | 90 | 0 |
| 1949 10 16 18 11 NOT NAMED | 35.0 | 66.5 | 85 | 0 |
| 1949 10 17 0 11 NOT NAMED  | 35.7 | 65.5 | 65 | 0 |
| 1949 10 17 6 11 NOT NAMED  | 36.3 | 64.5 | 60 | 0 |
| 1949 10 17 12 11 NOT NAMED | 36.9 | 63.6 | 55 | 0 |
| 1949 10 17 18 11 NOT NAMED | 37.3 | 62.9 | 55 | 0 |
| 1949 10 18 0 11 NOT NAMED  | 37.8 | 62.5 | 50 | 0 |
| 1949 10 18 6 11 NOT NAMED  | 38.5 | 62.2 | 50 | 0 |
| 1949 10 18 12 11 NOT NAMED | 39.3 | 62.0 | 50 | 0 |
| 1949 10 18 18 11 NOT NAMED | 40.0 | 62.1 | 45 | 0 |
| 1949 10 19 0 11 NOT NAMED  | 40.7 | 62.2 | 45 | 0 |
| 1949 10 19 6 11 NOT NAMED  | 41.5 | 62.2 | 45 | 0 |
| 1949 10 19 12 11 NOT NAMED | 42.1 | 61.9 | 45 | 0 |
| 1949 10 19 18 11 NOT NAMED | 43.6 | 59.6 | 45 | 0 |
| 1949 10 13 6 12 NOT NAMED  | 21.8 | 49.2 | 35 | 0 |
| 1949 10 13 12 12 NOT NAMED | 22.1 | 50.1 | 35 | 0 |
| 1949 10 13 18 12 NOT NAMED | 22.5 | 50.9 | 35 | 0 |
| 1949 10 14 0 12 NOT NAMED  | 22.9 | 51.6 | 35 | 0 |
| 1949 10 14 6 12 NOT NAMED  | 23.3 | 52.2 | 40 | 0 |
| 1949 10 14 12 12 NOT NAMED | 24.0 | 52.7 | 40 | 0 |
| 1949 10 14 18 12 NOT NAMED | 25.1 | 53.3 | 45 | 0 |
| 1949 10 15 0 12 NOT NAMED  | 26.3 | 53.9 | 50 | 0 |
| 1949 10 15 6 12 NOT NAMED  | 27.5 | 54.6 | 50 | 0 |
| 1949 10 15 12 12 NOT NAMED | 28.8 | 55.3 | 50 | 0 |
| 1949 10 15 18 12 NOT NAMED | 30.4 | 56.2 | 50 | 0 |
| 1949 10 16 0 12 NOT NAMED  | 32.1 | 57.1 | 50 | 0 |
| 1949 10 16 6 12 NOT NAMED  | 33.6 | 57.2 | 45 | 0 |
| 1949 10 16 12 12 NOT NAMED | 35.0 | 56.6 | 40 | 0 |
| 1949 10 16 18 12 NOT NAMED | 36.1 | 55.8 | 35 | 0 |

|      |    |    |    |    |           |      |      |     |   |
|------|----|----|----|----|-----------|------|------|-----|---|
| 1949 | 10 | 17 | 0  | 12 | NOT NAMED | 37.1 | 53.6 | 30  | 0 |
| 1949 | 10 | 17 | 6  | 12 | NOT NAMED | 37.8 | 51.5 | 25  | 0 |
| 1949 | 11 | 3  | 6  | 13 | NOT NAMED | 17.8 | 82.0 | 50  | 0 |
| 1949 | 11 | 3  | 12 | 13 | NOT NAMED | 17.8 | 83.2 | 50  | 0 |
| 1949 | 11 | 3  | 18 | 13 | NOT NAMED | 17.2 | 83.6 | 50  | 0 |
| 1949 | 11 | 4  | 0  | 13 | NOT NAMED | 16.7 | 83.9 | 45  | 0 |
| 1949 | 11 | 4  | 6  | 13 | NOT NAMED | 16.3 | 84.1 | 40  | 0 |
| 1949 | 11 | 4  | 12 | 13 | NOT NAMED | 15.8 | 84.2 | 35  | 0 |
| 1949 | 11 | 4  | 18 | 13 | NOT NAMED | 14.3 | 83.9 | 30  | 0 |
| 1949 | 11 | 5  | 0  | 13 | NOT NAMED | 14.5 | 82.6 | 25  | 0 |
| 1950 | 8  | 12 | 0  | 1  | ABLE      | 16.5 | 54.5 | 35  | 0 |
| 1950 | 8  | 12 | 6  | 1  | ABLE      | 17.1 | 55.5 | 40  | 0 |
| 1950 | 8  | 12 | 12 | 1  | ABLE      | 17.7 | 57.0 | 45  | 0 |
| 1950 | 8  | 12 | 18 | 1  | ABLE      | 18.4 | 58.3 | 50  | 0 |
| 1950 | 8  | 13 | 0  | 1  | ABLE      | 19.1 | 59.5 | 50  | 0 |
| 1950 | 8  | 13 | 6  | 1  | ABLE      | 20.1 | 61.1 | 55  | 0 |
| 1950 | 8  | 13 | 12 | 1  | ABLE      | 21.0 | 62.5 | 65  | 0 |
| 1950 | 8  | 13 | 18 | 1  | ABLE      | 21.6 | 63.2 | 70  | 0 |
| 1950 | 8  | 14 | 0  | 1  | ABLE      | 22.2 | 63.7 | 70  | 0 |
| 1950 | 8  | 14 | 6  | 1  | ABLE      | 23.0 | 64.6 | 70  | 0 |
| 1950 | 8  | 14 | 12 | 1  | ABLE      | 23.6 | 65.3 | 70  | 0 |
| 1950 | 8  | 14 | 18 | 1  | ABLE      | 24.0 | 65.8 | 75  | 0 |
| 1950 | 8  | 15 | 0  | 1  | ABLE      | 24.4 | 66.2 | 75  | 0 |
| 1950 | 8  | 15 | 6  | 1  | ABLE      | 24.8 | 66.7 | 75  | 0 |
| 1950 | 8  | 15 | 12 | 1  | ABLE      | 25.2 | 67.2 | 80  | 0 |
| 1950 | 8  | 15 | 18 | 1  | ABLE      | 25.5 | 67.7 | 80  | 0 |
| 1950 | 8  | 16 | 0  | 1  | ABLE      | 25.7 | 68.3 | 85  | 0 |
| 1950 | 8  | 16 | 6  | 1  | ABLE      | 25.8 | 68.8 | 90  | 0 |
| 1950 | 8  | 16 | 12 | 1  | ABLE      | 25.7 | 69.2 | 90  | 0 |
| 1950 | 8  | 16 | 18 | 1  | ABLE      | 25.6 | 69.7 | 95  | 0 |
| 1950 | 8  | 17 | 0  | 1  | ABLE      | 25.4 | 70.4 | 100 | 0 |
| 1950 | 8  | 17 | 6  | 1  | ABLE      | 25.3 | 71.4 | 105 | 0 |
| 1950 | 8  | 17 | 12 | 1  | ABLE      | 25.3 | 72.4 | 110 | 0 |
| 1950 | 8  | 17 | 18 | 1  | ABLE      | 25.5 | 73.2 | 115 | 0 |
| 1950 | 8  | 18 | 0  | 1  | ABLE      | 26.1 | 73.8 | 120 | 0 |
| 1950 | 8  | 18 | 6  | 1  | ABLE      | 26.8 | 74.4 | 120 | 0 |
| 1950 | 8  | 18 | 12 | 1  | ABLE      | 27.5 | 74.9 | 120 | 0 |
| 1950 | 8  | 18 | 18 | 1  | ABLE      | 28.2 | 75.4 | 120 | 0 |
| 1950 | 8  | 19 | 0  | 1  | ABLE      | 28.9 | 75.8 | 120 | 0 |
| 1950 | 8  | 19 | 6  | 1  | ABLE      | 29.9 | 76.1 | 120 | 0 |
| 1950 | 8  | 19 | 12 | 1  | ABLE      | 31.0 | 76.2 | 120 | 0 |
| 1950 | 8  | 19 | 18 | 1  | ABLE      | 31.9 | 76.0 | 120 | 0 |
| 1950 | 8  | 20 | 0  | 1  | ABLE      | 32.8 | 75.7 | 120 | 0 |
| 1950 | 8  | 20 | 6  | 1  | ABLE      | 34.5 | 74.8 | 115 | 0 |

|      |         |         |      |      |     |   |
|------|---------|---------|------|------|-----|---|
| 1950 | 8 20 12 | 1 ABLE  | 36.5 | 72.9 | 110 | 0 |
| 1950 | 8 20 18 | 1 ABLE  | 37.9 | 71.4 | 105 | 0 |
| 1950 | 8 21 0  | 1 ABLE  | 39.4 | 69.5 | 90  | 0 |
| 1950 | 8 21 6  | 1 ABLE  | 41.8 | 67.0 | 65  | 0 |
| 1950 | 8 21 12 | 1 ABLE  | 44.2 | 64.3 | 35  | 0 |
| 1950 | 8 21 18 | 1 ABLE  | 46.0 | 62.0 | 30  | 0 |
| 1950 | 8 22 0  | 1 ABLE  | 47.9 | 59.6 | 30  | 0 |
| 1950 | 8 22 6  | 1 ABLE  | 49.8 | 56.8 | 25  | 0 |
| 1950 | 8 22 12 | 1 ABLE  | 51.8 | 54.0 | 25  | 0 |
| 1950 | 8 22 18 | 1 ABLE  | 53.6 | 50.7 | 25  | 0 |
| 1950 | 8 20 6  | 2 BAKER | 16.3 | 55.0 | 60  | 0 |
| 1950 | 8 20 12 | 2 BAKER | 16.5 | 56.5 | 60  | 0 |
| 1950 | 8 20 18 | 2 BAKER | 16.5 | 57.4 | 65  | 0 |
| 1950 | 8 21 0  | 2 BAKER | 16.6 | 58.3 | 80  | 0 |
| 1950 | 8 21 6  | 2 BAKER | 16.6 | 59.2 | 95  | 0 |
| 1950 | 8 21 12 | 2 BAKER | 16.7 | 60.0 | 105 | 0 |
| 1950 | 8 21 18 | 2 BAKER | 16.6 | 60.7 | 100 | 0 |
| 1950 | 8 22 0  | 2 BAKER | 16.5 | 61.3 | 90  | 0 |
| 1950 | 8 22 6  | 2 BAKER | 16.6 | 61.8 | 80  | 0 |
| 1950 | 8 22 12 | 2 BAKER | 16.7 | 62.4 | 70  | 0 |
| 1950 | 8 22 18 | 2 BAKER | 16.8 | 63.1 | 60  | 0 |
| 1950 | 8 23 0  | 2 BAKER | 17.0 | 64.0 | 50  | 0 |
| 1950 | 8 23 6  | 2 BAKER | 17.3 | 65.0 | 40  | 0 |
| 1950 | 8 23 12 | 2 BAKER | 17.6 | 66.0 | 35  | 0 |
| 1950 | 8 23 18 | 2 BAKER | 18.0 | 67.0 | 30  | 0 |
| 1950 | 8 24 0  | 2 BAKER | 18.6 | 68.3 | 30  | 0 |
| 1950 | 8 24 6  | 2 BAKER | 19.4 | 70.0 | 25  | 0 |
| 1950 | 8 24 12 | 2 BAKER | 20.3 | 71.7 | 25  | 0 |
| 1950 | 8 24 18 | 2 BAKER | 20.9 | 73.4 | 25  | 0 |
| 1950 | 8 25 0  | 2 BAKER | 21.3 | 75.1 | 25  | 0 |
| 1950 | 8 25 6  | 2 BAKER | 21.6 | 77.0 | 25  | 0 |
| 1950 | 8 25 12 | 2 BAKER | 21.8 | 78.4 | 30  | 0 |
| 1950 | 8 25 18 | 2 BAKER | 21.8 | 79.3 | 30  | 0 |
| 1950 | 8 26 0  | 2 BAKER | 21.7 | 80.1 | 35  | 0 |
| 1950 | 8 26 6  | 2 BAKER | 21.8 | 81.0 | 35  | 0 |
| 1950 | 8 26 12 | 2 BAKER | 21.8 | 81.8 | 40  | 0 |
| 1950 | 8 26 18 | 2 BAKER | 21.9 | 82.6 | 40  | 0 |
| 1950 | 8 27 0  | 2 BAKER | 22.0 | 83.3 | 45  | 0 |
| 1950 | 8 27 6  | 2 BAKER | 22.1 | 84.1 | 50  | 0 |
| 1950 | 8 27 12 | 2 BAKER | 22.2 | 84.8 | 50  | 0 |
| 1950 | 8 27 18 | 2 BAKER | 22.3 | 85.6 | 55  | 0 |
| 1950 | 8 28 0  | 2 BAKER | 22.6 | 86.4 | 55  | 0 |
| 1950 | 8 28 6  | 2 BAKER | 22.9 | 87.2 | 60  | 0 |
| 1950 | 8 28 12 | 2 BAKER | 23.2 | 87.7 | 65  | 0 |

|      |         |           |      |      |    |     |
|------|---------|-----------|------|------|----|-----|
| 1950 | 8 28 18 | 2 BAKER   | 23.4 | 88.0 | 65 | 0   |
| 1950 | 8 29 0  | 2 BAKER   | 23.6 | 88.3 | 70 | 0   |
| 1950 | 8 29 6  | 2 BAKER   | 23.9 | 88.6 | 75 | 0   |
| 1950 | 8 29 12 | 2 BAKER   | 24.4 | 88.9 | 80 | 0   |
| 1950 | 8 29 18 | 2 BAKER   | 25.0 | 89.1 | 85 | 0   |
| 1950 | 8 30 0  | 2 BAKER   | 25.6 | 89.2 | 90 | 0   |
| 1950 | 8 30 6  | 2 BAKER   | 26.3 | 89.3 | 90 | 979 |
| 1950 | 8 30 12 | 2 BAKER   | 27.2 | 89.2 | 95 | 0   |
| 1950 | 8 30 18 | 2 BAKER   | 28.2 | 88.7 | 95 | 0   |
| 1950 | 8 31 0  | 2 BAKER   | 29.4 | 88.1 | 75 | 0   |
| 1950 | 8 31 6  | 2 BAKER   | 30.8 | 87.8 | 65 | 0   |
| 1950 | 8 31 12 | 2 BAKER   | 32.2 | 87.9 | 50 | 0   |
| 1950 | 8 31 18 | 2 BAKER   | 33.2 | 88.1 | 35 | 0   |
| 1950 | 9 1 0   | 2 BAKER   | 34.3 | 88.5 | 25 | 0   |
| 1950 | 9 1 6   | 2 BAKER   | 35.2 | 88.9 | 20 | 0   |
| 1950 | 9 1 12  | 2 BAKER   | 36.0 | 89.3 | 15 | 0   |
| 1950 | 9 1 18  | 2 BAKER   | 37.0 | 89.9 | 15 | 0   |
| 1950 | 8 21 12 | 3 CHARLIE | 13.1 | 24.0 | 35 | 0   |
| 1950 | 8 21 18 | 3 CHARLIE | 12.4 | 25.4 | 35 | 0   |
| 1950 | 8 22 0  | 3 CHARLIE | 11.8 | 27.0 | 35 | 0   |
| 1950 | 8 22 6  | 3 CHARLIE | 11.2 | 28.8 | 35 | 0   |
| 1950 | 8 22 12 | 3 CHARLIE | 10.7 | 30.6 | 35 | 0   |
| 1950 | 8 22 18 | 3 CHARLIE | 10.4 | 32.0 | 35 | 0   |
| 1950 | 8 23 0  | 3 CHARLIE | 10.3 | 33.2 | 35 | 0   |
| 1950 | 8 23 6  | 3 CHARLIE | 10.2 | 34.4 | 35 | 0   |
| 1950 | 8 23 12 | 3 CHARLIE | 10.2 | 35.6 | 35 | 0   |
| 1950 | 8 23 18 | 3 CHARLIE | 10.3 | 36.9 | 35 | 0   |
| 1950 | 8 24 0  | 3 CHARLIE | 10.3 | 38.2 | 35 | 0   |
| 1950 | 8 24 6  | 3 CHARLIE | 10.4 | 39.1 | 35 | 0   |
| 1950 | 8 24 12 | 3 CHARLIE | 10.5 | 40.0 | 35 | 0   |
| 1950 | 8 24 18 | 3 CHARLIE | 10.6 | 41.0 | 40 | 0   |
| 1950 | 8 25 0  | 3 CHARLIE | 10.8 | 42.0 | 40 | 0   |
| 1950 | 8 25 6  | 3 CHARLIE | 11.0 | 42.7 | 40 | 0   |
| 1950 | 8 25 12 | 3 CHARLIE | 11.4 | 43.4 | 40 | 0   |
| 1950 | 8 25 18 | 3 CHARLIE | 12.2 | 44.1 | 40 | 0   |
| 1950 | 8 26 0  | 3 CHARLIE | 13.2 | 44.9 | 45 | 0   |
| 1950 | 8 26 6  | 3 CHARLIE | 14.4 | 45.8 | 45 | 0   |
| 1950 | 8 26 12 | 3 CHARLIE | 15.5 | 46.7 | 45 | 0   |
| 1950 | 8 26 18 | 3 CHARLIE | 16.4 | 47.4 | 45 | 0   |
| 1950 | 8 27 0  | 3 CHARLIE | 17.2 | 48.0 | 50 | 0   |
| 1950 | 8 27 6  | 3 CHARLIE | 18.1 | 48.7 | 55 | 0   |
| 1950 | 8 27 12 | 3 CHARLIE | 19.0 | 49.5 | 55 | 0   |
| 1950 | 8 27 18 | 3 CHARLIE | 20.4 | 51.0 | 60 | 0   |
| 1950 | 8 28 0  | 3 CHARLIE | 22.0 | 52.8 | 70 | 0   |



|      |      |    |   |         |      |      |     |   |
|------|------|----|---|---------|------|------|-----|---|
| 1950 | 8 28 | 6  | 3 | CHARLIE | 23.4 | 54.3 | 80  | 0 |
| 1950 | 8 28 | 12 | 3 | CHARLIE | 24.7 | 55.5 | 85  | 0 |
| 1950 | 8 28 | 18 | 3 | CHARLIE | 25.5 | 56.4 | 90  | 0 |
| 1950 | 8 29 | 0  | 3 | CHARLIE | 26.2 | 57.1 | 95  | 0 |
| 1950 | 8 29 | 6  | 3 | CHARLIE | 27.7 | 57.7 | 95  | 0 |
| 1950 | 8 29 | 12 | 3 | CHARLIE | 29.2 | 58.0 | 100 | 0 |
| 1950 | 8 29 | 18 | 3 | CHARLIE | 30.3 | 57.8 | 100 | 0 |
| 1950 | 8 30 | 0  | 3 | CHARLIE | 31.3 | 57.3 | 100 | 0 |
| 1950 | 8 30 | 6  | 3 | CHARLIE | 32.3 | 56.6 | 95  | 0 |
| 1950 | 8 30 | 12 | 3 | CHARLIE | 33.2 | 55.8 | 90  | 0 |
| 1950 | 8 30 | 18 | 3 | CHARLIE | 32.8 | 54.6 | 90  | 0 |
| 1950 | 8 31 | 0  | 3 | CHARLIE | 32.2 | 55.4 | 85  | 0 |
| 1950 | 8 31 | 6  | 3 | CHARLIE | 32.4 | 56.2 | 85  | 0 |
| 1950 | 8 31 | 12 | 3 | CHARLIE | 32.6 | 57.1 | 85  | 0 |
| 1950 | 8 31 | 18 | 3 | CHARLIE | 32.7 | 57.7 | 85  | 0 |
| 1950 | 9 1  | 0  | 3 | CHARLIE | 32.7 | 58.2 | 75  | 0 |
| 1950 | 9 1  | 6  | 3 | CHARLIE | 32.8 | 58.6 | 75  | 0 |
| 1950 | 9 1  | 12 | 3 | CHARLIE | 32.9 | 59.0 | 70  | 0 |
| 1950 | 9 1  | 18 | 3 | CHARLIE | 33.0 | 59.5 | 75  | 0 |
| 1950 | 9 2  | 0  | 3 | CHARLIE | 33.0 | 60.1 | 75  | 0 |
| 1950 | 9 2  | 6  | 3 | CHARLIE | 33.1 | 60.7 | 80  | 0 |
| 1950 | 9 2  | 12 | 3 | CHARLIE | 33.3 | 61.2 | 85  | 0 |
| 1950 | 9 2  | 18 | 3 | CHARLIE | 34.1 | 61.7 | 85  | 0 |
| 1950 | 9 3  | 0  | 3 | CHARLIE | 35.0 | 61.7 | 85  | 0 |
| 1950 | 9 3  | 6  | 3 | CHARLIE | 35.7 | 61.3 | 85  | 0 |
| 1950 | 9 3  | 12 | 3 | CHARLIE | 36.3 | 60.8 | 85  | 0 |
| 1950 | 9 3  | 18 | 3 | CHARLIE | 36.6 | 60.5 | 80  | 0 |
| 1950 | 9 4  | 0  | 3 | CHARLIE | 36.9 | 60.1 | 75  | 0 |
| 1950 | 9 4  | 6  | 3 | CHARLIE | 37.3 | 59.5 | 70  | 0 |
| 1950 | 9 4  | 12 | 3 | CHARLIE | 37.8 | 58.8 | 70  | 0 |
| 1950 | 9 4  | 18 | 3 | CHARLIE | 38.4 | 58.1 | 65  | 0 |
| 1950 | 9 5  | 0  | 3 | CHARLIE | 39.7 | 56.8 | 55  | 0 |
| 1950 | 9 5  | 6  | 3 | CHARLIE | 41.7 | 54.7 | 45  | 0 |
| 1950 | 9 5  | 12 | 3 | CHARLIE | 43.7 | 52.5 | 40  | 0 |
| 1950 | 8 30 | 18 | 4 | DOG     | 15.2 | 55.3 | 60  | 0 |
| 1950 | 8 31 | 0  | 4 | DOG     | 15.7 | 56.5 | 65  | 0 |
| 1950 | 8 31 | 6  | 4 | DOG     | 15.9 | 57.6 | 70  | 0 |
| 1950 | 8 31 | 12 | 4 | DOG     | 16.0 | 58.7 | 75  | 0 |
| 1950 | 8 31 | 18 | 4 | DOG     | 16.2 | 59.6 | 80  | 0 |
| 1950 | 9 1  | 0  | 4 | DOG     | 16.4 | 60.3 | 85  | 0 |
| 1950 | 9 1  | 6  | 4 | DOG     | 16.9 | 61.1 | 90  | 0 |
| 1950 | 9 1  | 12 | 4 | DOG     | 17.5 | 61.8 | 95  | 0 |
| 1950 | 9 1  | 18 | 4 | DOG     | 17.9 | 62.3 | 105 | 0 |
| 1950 | 9 2  | 0  | 4 | DOG     | 18.4 | 62.8 | 110 | 0 |

|      |   |    |    |   |     |      |      |     |   |
|------|---|----|----|---|-----|------|------|-----|---|
| 1950 | 9 | 2  | 6  | 4 | DOG | 19.1 | 63.6 | 110 | 0 |
| 1950 | 9 | 2  | 12 | 4 | DOG | 19.8 | 64.3 | 115 | 0 |
| 1950 | 9 | 2  | 18 | 4 | DOG | 20.3 | 64.7 | 115 | 0 |
| 1950 | 9 | 3  | 0  | 4 | DOG | 20.7 | 65.0 | 120 | 0 |
| 1950 | 9 | 3  | 6  | 4 | DOG | 21.0 | 65.2 | 125 | 0 |
| 1950 | 9 | 3  | 12 | 4 | DOG | 21.3 | 65.5 | 125 | 0 |
| 1950 | 9 | 3  | 18 | 4 | DOG | 21.6 | 65.8 | 125 | 0 |
| 1950 | 9 | 4  | 0  | 4 | DOG | 21.9 | 66.1 | 130 | 0 |
| 1950 | 9 | 4  | 6  | 4 | DOG | 22.2 | 66.4 | 130 | 0 |
| 1950 | 9 | 4  | 12 | 4 | DOG | 22.6 | 66.8 | 135 | 0 |
| 1950 | 9 | 4  | 18 | 4 | DOG | 22.9 | 67.2 | 135 | 0 |
| 1950 | 9 | 5  | 0  | 4 | DOG | 23.4 | 67.7 | 140 | 0 |
| 1950 | 9 | 5  | 6  | 4 | DOG | 24.1 | 68.1 | 140 | 0 |
| 1950 | 9 | 5  | 12 | 4 | DOG | 24.8 | 68.4 | 145 | 0 |
| 1950 | 9 | 5  | 18 | 4 | DOG | 25.5 | 68.5 | 145 | 0 |
| 1950 | 9 | 6  | 0  | 4 | DOG | 26.2 | 68.5 | 155 | 0 |
| 1950 | 9 | 6  | 6  | 4 | DOG | 26.7 | 68.4 | 160 | 0 |
| 1950 | 9 | 6  | 12 | 4 | DOG | 27.2 | 68.3 | 160 | 0 |
| 1950 | 9 | 6  | 18 | 4 | DOG | 27.9 | 68.1 | 160 | 0 |
| 1950 | 9 | 7  | 0  | 4 | DOG | 28.6 | 67.9 | 150 | 0 |
| 1950 | 9 | 7  | 6  | 4 | DOG | 29.3 | 67.7 | 140 | 0 |
| 1950 | 9 | 7  | 12 | 4 | DOG | 30.0 | 67.5 | 130 | 0 |
| 1950 | 9 | 7  | 18 | 4 | DOG | 30.4 | 67.4 | 125 | 0 |
| 1950 | 9 | 8  | 0  | 4 | DOG | 30.7 | 67.3 | 115 | 0 |
| 1950 | 9 | 8  | 6  | 4 | DOG | 30.9 | 67.4 | 105 | 0 |
| 1950 | 9 | 8  | 12 | 4 | DOG | 31.2 | 67.7 | 95  | 0 |
| 1950 | 9 | 8  | 18 | 4 | DOG | 31.1 | 68.2 | 90  | 0 |
| 1950 | 9 | 9  | 0  | 4 | DOG | 31.0 | 68.6 | 85  | 0 |
| 1950 | 9 | 9  | 6  | 4 | DOG | 30.9 | 69.0 | 85  | 0 |
| 1950 | 9 | 9  | 12 | 4 | DOG | 30.7 | 69.5 | 80  | 0 |
| 1950 | 9 | 9  | 18 | 4 | DOG | 30.6 | 69.9 | 80  | 0 |
| 1950 | 9 | 10 | 0  | 4 | DOG | 30.5 | 70.2 | 80  | 0 |
| 1950 | 9 | 10 | 6  | 4 | DOG | 30.5 | 70.6 | 80  | 0 |
| 1950 | 9 | 10 | 12 | 4 | DOG | 31.0 | 71.0 | 85  | 0 |
| 1950 | 9 | 10 | 18 | 4 | DOG | 32.3 | 71.7 | 85  | 0 |
| 1950 | 9 | 11 | 0  | 4 | DOG | 33.7 | 72.1 | 85  | 0 |
| 1950 | 9 | 11 | 6  | 4 | DOG | 35.1 | 72.3 | 85  | 0 |
| 1950 | 9 | 11 | 12 | 4 | DOG | 36.5 | 72.1 | 80  | 0 |
| 1950 | 9 | 11 | 18 | 4 | DOG | 37.9 | 71.7 | 75  | 0 |
| 1950 | 9 | 12 | 0  | 4 | DOG | 39.3 | 70.6 | 65  | 0 |
| 1950 | 9 | 12 | 6  | 4 | DOG | 40.5 | 68.8 | 65  | 0 |
| 1950 | 9 | 12 | 12 | 4 | DOG | 41.3 | 66.9 | 60  | 0 |
| 1950 | 9 | 12 | 18 | 4 | DOG | 41.9 | 65.1 | 60  | 0 |
| 1950 | 9 | 13 | 0  | 4 | DOG | 42.2 | 63.4 | 60  | 0 |

|      |   |    |    |   |      |      |      |     |     |
|------|---|----|----|---|------|------|------|-----|-----|
| 1950 | 9 | 13 | 6  | 4 | DOG  | 42.4 | 61.8 | 55  | 0   |
| 1950 | 9 | 13 | 12 | 4 | DOG  | 42.6 | 60.3 | 55  | 0   |
| 1950 | 9 | 13 | 18 | 4 | DOG  | 42.8 | 58.3 | 50  | 0   |
| 1950 | 9 | 14 | 0  | 4 | DOG  | 42.9 | 55.9 | 50  | 0   |
| 1950 | 9 | 14 | 6  | 4 | DOG  | 43.0 | 53.2 | 50  | 0   |
| 1950 | 9 | 14 | 12 | 4 | DOG  | 43.1 | 50.0 | 50  | 0   |
| 1950 | 9 | 14 | 18 | 4 | DOG  | 43.2 | 46.2 | 50  | 0   |
| 1950 | 9 | 15 | 0  | 4 | DOG  | 43.4 | 42.1 | 50  | 0   |
| 1950 | 9 | 15 | 6  | 4 | DOG  | 44.0 | 37.9 | 50  | 0   |
| 1950 | 9 | 15 | 12 | 4 | DOG  | 45.3 | 33.6 | 50  | 0   |
| 1950 | 9 | 15 | 18 | 4 | DOG  | 47.1 | 28.5 | 50  | 0   |
| 1950 | 9 | 16 | 0  | 4 | DOG  | 49.0 | 23.2 | 50  | 0   |
| 1950 | 9 | 16 | 6  | 4 | DOG  | 50.9 | 18.6 | 50  | 0   |
| 1950 | 9 | 16 | 12 | 4 | DOG  | 52.8 | 14.7 | 50  | 0   |
| 1950 | 9 | 16 | 18 | 4 | DOG  | 54.3 | 11.6 | 50  | 0   |
| 1950 | 9 | 17 | 0  | 4 | DOG  | 55.2 | 9.1  | 50  | 0   |
| 1950 | 9 | 1  | 6  | 5 | EASY | 19.1 | 84.1 | 40  | 0   |
| 1950 | 9 | 1  | 12 | 5 | EASY | 20.2 | 83.5 | 45  | 0   |
| 1950 | 9 | 1  | 18 | 5 | EASY | 20.4 | 83.4 | 50  | 0   |
| 1950 | 9 | 2  | 0  | 5 | EASY | 20.6 | 83.2 | 55  | 0   |
| 1950 | 9 | 2  | 6  | 5 | EASY | 20.8 | 83.0 | 60  | 0   |
| 1950 | 9 | 2  | 12 | 5 | EASY | 21.0 | 82.8 | 65  | 0   |
| 1950 | 9 | 2  | 18 | 5 | EASY | 21.4 | 82.5 | 65  | 0   |
| 1950 | 9 | 3  | 0  | 5 | EASY | 22.0 | 82.2 | 70  | 0   |
| 1950 | 9 | 3  | 6  | 5 | EASY | 22.8 | 82.0 | 70  | 0   |
| 1950 | 9 | 3  | 12 | 5 | EASY | 23.7 | 82.0 | 70  | 0   |
| 1950 | 9 | 3  | 18 | 5 | EASY | 24.9 | 82.4 | 75  | 0   |
| 1950 | 9 | 4  | 0  | 5 | EASY | 26.0 | 82.8 | 90  | 0   |
| 1950 | 9 | 4  | 6  | 5 | EASY | 26.9 | 83.2 | 105 | 0   |
| 1950 | 9 | 4  | 12 | 5 | EASY | 27.4 | 83.2 | 110 | 0   |
| 1950 | 9 | 4  | 18 | 5 | EASY | 28.0 | 83.8 | 110 | 0   |
| 1950 | 9 | 5  | 0  | 5 | EASY | 27.9 | 83.1 | 110 | 0   |
| 1950 | 9 | 5  | 6  | 5 | EASY | 28.3 | 82.9 | 105 | 958 |
| 1950 | 9 | 5  | 12 | 5 | EASY | 28.7 | 82.6 | 105 | 0   |
| 1950 | 9 | 5  | 18 | 5 | EASY | 29.0 | 83.0 | 100 | 0   |
| 1950 | 9 | 6  | 0  | 5 | EASY | 28.3 | 82.6 | 85  | 0   |
| 1950 | 9 | 6  | 6  | 5 | EASY | 28.2 | 82.2 | 65  | 0   |
| 1950 | 9 | 6  | 12 | 5 | EASY | 28.3 | 81.8 | 60  | 0   |
| 1950 | 9 | 6  | 18 | 5 | EASY | 28.6 | 81.5 | 50  | 0   |
| 1950 | 9 | 7  | 0  | 5 | EASY | 29.3 | 81.2 | 45  | 0   |
| 1950 | 9 | 7  | 6  | 5 | EASY | 30.0 | 81.7 | 40  | 0   |
| 1950 | 9 | 7  | 12 | 5 | EASY | 31.2 | 83.0 | 35  | 0   |
| 1950 | 9 | 7  | 18 | 5 | EASY | 32.4 | 84.5 | 30  | 0   |
| 1950 | 9 | 8  | 0  | 5 | EASY | 33.4 | 85.9 | 30  | 0   |

|      |   |    |    |   |      |      |      |     |   |
|------|---|----|----|---|------|------|------|-----|---|
| 1950 | 9 | 8  | 6  | 5 | EASY | 34.1 | 87.0 | 25  | 0 |
| 1950 | 9 | 8  | 12 | 5 | EASY | 34.6 | 87.7 | 25  | 0 |
| 1950 | 9 | 8  | 18 | 5 | EASY | 34.8 | 88.1 | 25  | 0 |
| 1950 | 9 | 9  | 0  | 5 | EASY | 35.0 | 88.6 | 25  | 0 |
| 1950 | 9 | 9  | 6  | 5 | EASY | 35.3 | 89.2 | 25  | 0 |
| 1950 | 9 | 9  | 12 | 5 | EASY | 35.6 | 89.7 | 25  | 0 |
| 1950 | 9 | 9  | 18 | 5 | EASY | 35.9 | 90.2 | 25  | 0 |
| 1950 | 9 | 8  | 6  | 6 | FOX  | 15.6 | 40.1 | 40  | 0 |
| 1950 | 9 | 8  | 12 | 6 | FOX  | 15.7 | 41.1 | 40  | 0 |
| 1950 | 9 | 8  | 18 | 6 | FOX  | 15.7 | 42.3 | 40  | 0 |
| 1950 | 9 | 9  | 0  | 6 | FOX  | 15.8 | 43.4 | 45  | 0 |
| 1950 | 9 | 9  | 6  | 6 | FOX  | 15.9 | 44.5 | 45  | 0 |
| 1950 | 9 | 9  | 12 | 6 | FOX  | 16.1 | 45.5 | 50  | 0 |
| 1950 | 9 | 9  | 18 | 6 | FOX  | 16.6 | 46.9 | 50  | 0 |
| 1950 | 9 | 10 | 0  | 6 | FOX  | 17.3 | 48.3 | 55  | 0 |
| 1950 | 9 | 10 | 6  | 6 | FOX  | 18.1 | 49.4 | 60  | 0 |
| 1950 | 9 | 10 | 12 | 6 | FOX  | 18.9 | 50.2 | 65  | 0 |
| 1950 | 9 | 10 | 18 | 6 | FOX  | 19.5 | 50.8 | 70  | 0 |
| 1950 | 9 | 11 | 0  | 6 | FOX  | 19.9 | 51.3 | 75  | 0 |
| 1950 | 9 | 11 | 6  | 6 | FOX  | 20.2 | 51.8 | 80  | 0 |
| 1950 | 9 | 11 | 12 | 6 | FOX  | 20.5 | 52.3 | 80  | 0 |
| 1950 | 9 | 11 | 18 | 6 | FOX  | 21.0 | 53.0 | 85  | 0 |
| 1950 | 9 | 12 | 0  | 6 | FOX  | 21.4 | 53.7 | 85  | 0 |
| 1950 | 9 | 12 | 6  | 6 | FOX  | 21.8 | 54.3 | 85  | 0 |
| 1950 | 9 | 12 | 12 | 6 | FOX  | 22.0 | 54.7 | 90  | 0 |
| 1950 | 9 | 12 | 18 | 6 | FOX  | 22.2 | 55.1 | 90  | 0 |
| 1950 | 9 | 13 | 0  | 6 | FOX  | 22.4 | 55.4 | 90  | 0 |
| 1950 | 9 | 13 | 6  | 6 | FOX  | 22.5 | 55.7 | 95  | 0 |
| 1950 | 9 | 13 | 12 | 6 | FOX  | 22.7 | 56.2 | 95  | 0 |
| 1950 | 9 | 13 | 18 | 6 | FOX  | 22.8 | 56.9 | 100 | 0 |
| 1950 | 9 | 14 | 0  | 6 | FOX  | 23.1 | 57.6 | 105 | 0 |
| 1950 | 9 | 14 | 6  | 6 | FOX  | 23.5 | 58.3 | 110 | 0 |
| 1950 | 9 | 14 | 12 | 6 | FOX  | 24.0 | 59.0 | 115 | 0 |
| 1950 | 9 | 14 | 18 | 6 | FOX  | 24.6 | 59.4 | 120 | 0 |
| 1950 | 9 | 15 | 0  | 6 | FOX  | 25.5 | 59.7 | 120 | 0 |
| 1950 | 9 | 15 | 6  | 6 | FOX  | 26.6 | 59.8 | 120 | 0 |
| 1950 | 9 | 15 | 12 | 6 | FOX  | 28.3 | 59.7 | 120 | 0 |
| 1950 | 9 | 15 | 18 | 6 | FOX  | 30.6 | 59.1 | 115 | 0 |
| 1950 | 9 | 16 | 0  | 6 | FOX  | 33.0 | 57.7 | 110 | 0 |
| 1950 | 9 | 16 | 6  | 6 | FOX  | 35.0 | 55.9 | 105 | 0 |
| 1950 | 9 | 16 | 12 | 6 | FOX  | 36.8 | 53.7 | 100 | 0 |
| 1950 | 9 | 16 | 18 | 6 | FOX  | 38.2 | 51.2 | 90  | 0 |
| 1950 | 9 | 17 | 0  | 6 | FOX  | 39.3 | 48.5 | 85  | 0 |
| 1950 | 9 | 17 | 6  | 6 | FOX  | 41.9 | 42.8 | 65  | 0 |

|      |    |    |    |   |        |      |      |    |   |
|------|----|----|----|---|--------|------|------|----|---|
| 1950 | 9  | 27 | 6  | 7 | GEORGE | 24.4 | 52.7 | 35 | 0 |
| 1950 | 9  | 27 | 12 | 7 | GEORGE | 25.2 | 52.4 | 35 | 0 |
| 1950 | 9  | 27 | 18 | 7 | GEORGE | 25.9 | 52.3 | 35 | 0 |
| 1950 | 9  | 28 | 0  | 7 | GEORGE | 26.6 | 52.4 | 35 | 0 |
| 1950 | 9  | 28 | 6  | 7 | GEORGE | 27.4 | 52.8 | 35 | 0 |
| 1950 | 9  | 28 | 12 | 7 | GEORGE | 28.1 | 53.4 | 35 | 0 |
| 1950 | 9  | 28 | 18 | 7 | GEORGE | 28.7 | 54.2 | 35 | 0 |
| 1950 | 9  | 29 | 0  | 7 | GEORGE | 29.1 | 55.1 | 35 | 0 |
| 1950 | 9  | 29 | 6  | 7 | GEORGE | 29.4 | 56.1 | 35 | 0 |
| 1950 | 9  | 29 | 12 | 7 | GEORGE | 29.7 | 57.2 | 35 | 0 |
| 1950 | 9  | 29 | 18 | 7 | GEORGE | 30.1 | 59.0 | 35 | 0 |
| 1950 | 9  | 30 | 0  | 7 | GEORGE | 30.3 | 60.7 | 40 | 0 |
| 1950 | 9  | 30 | 6  | 7 | GEORGE | 30.3 | 61.5 | 40 | 0 |
| 1950 | 9  | 30 | 12 | 7 | GEORGE | 30.3 | 62.2 | 45 | 0 |
| 1950 | 9  | 30 | 18 | 7 | GEORGE | 30.3 | 63.2 | 50 | 0 |
| 1950 | 10 | 1  | 0  | 7 | GEORGE | 30.3 | 63.8 | 65 | 0 |
| 1950 | 10 | 1  | 6  | 7 | GEORGE | 30.3 | 64.0 | 70 | 0 |
| 1950 | 10 | 1  | 12 | 7 | GEORGE | 30.3 | 64.1 | 75 | 0 |
| 1950 | 10 | 1  | 18 | 7 | GEORGE | 30.3 | 64.3 | 80 | 0 |
| 1950 | 10 | 2  | 0  | 7 | GEORGE | 30.3 | 64.4 | 80 | 0 |
| 1950 | 10 | 2  | 6  | 7 | GEORGE | 30.3 | 64.7 | 80 | 0 |
| 1950 | 10 | 2  | 12 | 7 | GEORGE | 30.4 | 65.1 | 85 | 0 |
| 1950 | 10 | 2  | 18 | 7 | GEORGE | 30.7 | 65.7 | 85 | 0 |
| 1950 | 10 | 3  | 0  | 7 | GEORGE | 31.0 | 66.3 | 90 | 0 |
| 1950 | 10 | 3  | 6  | 7 | GEORGE | 31.2 | 66.7 | 90 | 0 |
| 1950 | 10 | 3  | 12 | 7 | GEORGE | 31.4 | 67.0 | 90 | 0 |
| 1950 | 10 | 3  | 18 | 7 | GEORGE | 33.0 | 68.0 | 95 | 0 |
| 1950 | 10 | 4  | 0  | 7 | GEORGE | 34.6 | 68.4 | 95 | 0 |
| 1950 | 10 | 4  | 6  | 7 | GEORGE | 36.3 | 67.5 | 95 | 0 |
| 1950 | 10 | 4  | 12 | 7 | GEORGE | 37.8 | 66.0 | 95 | 0 |
| 1950 | 10 | 4  | 18 | 7 | GEORGE | 39.9 | 63.7 | 95 | 0 |
| 1950 | 10 | 5  | 0  | 7 | GEORGE | 42.3 | 60.5 | 85 | 0 |
| 1950 | 10 | 5  | 6  | 7 | GEORGE | 44.6 | 56.7 | 65 | 0 |
| 1950 | 10 | 5  | 12 | 7 | GEORGE | 47.0 | 51.9 | 60 | 0 |
| 1950 | 10 | 5  | 18 | 7 | GEORGE | 49.5 | 46.0 | 60 | 0 |
| 1950 | 10 | 6  | 0  | 7 | GEORGE | 52.1 | 39.9 | 55 | 0 |
| 1950 | 10 | 6  | 6  | 7 | GEORGE | 54.8 | 34.1 | 55 | 0 |
| 1950 | 10 | 6  | 12 | 7 | GEORGE | 57.5 | 28.6 | 50 | 0 |
| 1950 | 10 | 6  | 18 | 7 | GEORGE | 58.7 | 26.8 | 50 | 0 |
| 1950 | 10 | 7  | 0  | 7 | GEORGE | 59.3 | 24.9 | 50 | 0 |
| 1950 | 10 | 7  | 6  | 7 | GEORGE | 59.9 | 22.9 | 45 | 0 |
| 1950 | 10 | 7  | 12 | 7 | GEORGE | 60.5 | 21.0 | 40 | 0 |
| 1950 | 10 | 1  | 6  | 8 | HOW    | 25.0 | 87.3 | 30 | 0 |
| 1950 | 10 | 1  | 12 | 8 | HOW    | 25.8 | 88.6 | 35 | 0 |

|         |          |        |      |      |     |   |
|---------|----------|--------|------|------|-----|---|
| 1950 10 | 1 18     | 8 HOW  | 26.0 | 89.0 | 40  | 0 |
| 1950 10 | 2 0      | 8 HOW  | 26.2 | 89.5 | 45  | 0 |
| 1950 10 | 2 6      | 8 HOW  | 26.3 | 90.1 | 50  | 0 |
| 1950 10 | 2 12     | 8 HOW  | 26.4 | 90.7 | 50  | 0 |
| 1950 10 | 2 18     | 8 HOW  | 26.5 | 91.7 | 50  | 0 |
| 1950 10 | 3 0      | 8 HOW  | 26.5 | 92.7 | 50  | 0 |
| 1950 10 | 3 6      | 8 HOW  | 26.4 | 93.6 | 50  | 0 |
| 1950 10 | 3 12     | 8 HOW  | 26.2 | 94.5 | 45  | 0 |
| 1950 10 | 3 18     | 8 HOW  | 25.8 | 95.5 | 45  | 0 |
| 1950 10 | 4 0      | 8 HOW  | 25.1 | 96.4 | 40  | 0 |
| 1950 10 | 4 6      | 8 HOW  | 24.3 | 97.1 | 35  | 0 |
| 1950 10 | 4 12     | 8 HOW  | 23.5 | 97.8 | 30  | 0 |
| 1950 10 | 4 18     | 8 HOW  | 22.5 | 98.8 | 25  | 0 |
| 1950 10 | 8 6      | 9 ITEM | 20.8 | 90.6 | 40  | 0 |
| 1950 10 | 8 12     | 9 ITEM | 20.8 | 91.0 | 45  | 0 |
| 1950 10 | 8 18     | 9 ITEM | 20.9 | 91.6 | 45  | 0 |
| 1950 10 | 9 0      | 9 ITEM | 21.0 | 92.2 | 50  | 0 |
| 1950 10 | 9 6      | 9 ITEM | 21.0 | 92.7 | 55  | 0 |
| 1950 10 | 9 12     | 9 ITEM | 21.0 | 93.2 | 65  | 0 |
| 1950 10 | 9 18     | 9 ITEM | 20.9 | 93.9 | 65  | 0 |
| 1950 10 | 10 0     | 9 ITEM | 20.6 | 94.6 | 80  | 0 |
| 1950 10 | 10 6     | 9 ITEM | 20.3 | 94.9 | 90  | 0 |
| 1950 10 | 10 12    | 9 ITEM | 19.9 | 95.3 | 95  | 0 |
| 1950 10 | 10 18    | 9 ITEM | 18.8 | 95.9 | 65  | 0 |
| 1950 10 | 11 12 10 | JIG    | 24.3 | 47.2 | 40  | 0 |
| 1950 10 | 11 18 10 | JIG    | 24.2 | 48.2 | 40  | 0 |
| 1950 10 | 12 0 10  | JIG    | 24.2 | 49.2 | 45  | 0 |
| 1950 10 | 12 6 10  | JIG    | 24.2 | 50.2 | 45  | 0 |
| 1950 10 | 12 12 10 | JIG    | 24.2 | 51.2 | 50  | 0 |
| 1950 10 | 12 18 10 | JIG    | 24.4 | 52.4 | 55  | 0 |
| 1950 10 | 13 0 10  | JIG    | 24.7 | 53.7 | 55  | 0 |
| 1950 10 | 13 6 10  | JIG    | 25.0 | 54.6 | 60  | 0 |
| 1950 10 | 13 12 10 | JIG    | 25.4 | 55.5 | 65  | 0 |
| 1950 10 | 13 18 10 | JIG    | 26.1 | 56.7 | 70  | 0 |
| 1950 10 | 14 0 10  | JIG    | 26.9 | 57.8 | 75  | 0 |
| 1950 10 | 14 6 10  | JIG    | 27.6 | 58.6 | 75  | 0 |
| 1950 10 | 14 12 10 | JIG    | 28.4 | 59.3 | 80  | 0 |
| 1950 10 | 14 18 10 | JIG    | 29.5 | 60.0 | 80  | 0 |
| 1950 10 | 15 0 10  | JIG    | 30.8 | 60.5 | 85  | 0 |
| 1950 10 | 15 6 10  | JIG    | 32.0 | 60.2 | 90  | 0 |
| 1950 10 | 15 12 10 | JIG    | 33.2 | 59.2 | 100 | 0 |
| 1950 10 | 15 18 10 | JIG    | 34.2 | 58.2 | 105 | 0 |
| 1950 10 | 16 0 10  | JIG    | 35.1 | 57.2 | 100 | 0 |
| 1950 10 | 16 6 10  | JIG    | 35.9 | 56.2 | 95  | 0 |

|                            |      |      |     |     |
|----------------------------|------|------|-----|-----|
| 1950 10 16 12 10 JIG       | 36.8 | 55.0 | 90  | 0   |
| 1950 10 16 18 10 JIG       | 38.8 | 51.5 | 90  | 0   |
| 1950 10 17 0 10 JIG        | 40.8 | 47.1 | 85  | 0   |
| 1950 10 17 6 10 JIG        | 41.9 | 44.5 | 65  | 0   |
| 1950 10 17 12 10 JIG       | 43.0 | 42.0 | 60  | 0   |
| 1950 10 17 18 10 JIG       | 44.1 | 39.9 | 60  | 0   |
| 1950 10 13 6 11 KING       | 16.0 | 84.2 | 35  | 0   |
| 1950 10 13 12 11 KING      | 16.0 | 83.9 | 35  | 0   |
| 1950 10 13 18 11 KING      | 16.0 | 83.4 | 35  | 0   |
| 1950 10 14 0 11 KING       | 16.0 | 83.0 | 35  | 0   |
| 1950 10 14 6 11 KING       | 16.0 | 82.7 | 40  | 0   |
| 1950 10 14 12 11 KING      | 16.2 | 82.4 | 40  | 0   |
| 1950 10 14 18 11 KING      | 16.5 | 81.8 | 45  | 0   |
| 1950 10 15 0 11 KING       | 16.8 | 81.2 | 50  | 0   |
| 1950 10 15 6 11 KING       | 17.0 | 80.8 | 50  | 0   |
| 1950 10 15 12 11 KING      | 17.3 | 80.4 | 55  | 0   |
| 1950 10 15 18 11 KING      | 17.7 | 80.0 | 60  | 0   |
| 1950 10 16 0 11 KING       | 18.2 | 79.6 | 65  | 0   |
| 1950 10 16 6 11 KING       | 18.9 | 79.1 | 75  | 0   |
| 1950 10 16 12 11 KING      | 19.6 | 78.7 | 85  | 0   |
| 1950 10 16 18 11 KING      | 20.2 | 78.5 | 95  | 0   |
| 1950 10 17 0 11 KING       | 20.9 | 78.5 | 100 | 0   |
| 1950 10 17 6 11 KING       | 21.9 | 78.6 | 105 | 955 |
| 1950 10 17 12 11 KING      | 23.0 | 79.0 | 105 | 0   |
| 1950 10 17 18 11 KING      | 23.8 | 79.3 | 100 | 0   |
| 1950 10 18 0 11 KING       | 24.7 | 79.7 | 95  | 0   |
| 1950 10 18 6 11 KING       | 25.8 | 80.2 | 90  | 0   |
| 1950 10 18 12 11 KING      | 27.0 | 80.8 | 75  | 0   |
| 1950 10 18 18 11 KING      | 28.6 | 81.5 | 65  | 0   |
| 1950 10 19 0 11 KING       | 30.0 | 82.4 | 35  | 0   |
| 1950 10 19 6 11 KING       | 31.1 | 83.5 | 25  | 0   |
| 1950 10 19 12 11 KING      | 32.1 | 84.6 | 25  | 0   |
| 1950 10 17 6 12 NOT NAMED  | 22.0 | 42.0 | 35  | 0   |
| 1950 10 17 12 12 NOT NAMED | 22.5 | 42.7 | 35  | 0   |
| 1950 10 17 18 12 NOT NAMED | 22.9 | 43.3 | 35  | 0   |
| 1950 10 18 0 12 NOT NAMED  | 23.4 | 43.8 | 35  | 0   |
| 1950 10 18 6 12 NOT NAMED  | 24.2 | 44.5 | 40  | 0   |
| 1950 10 18 12 12 NOT NAMED | 24.9 | 44.8 | 40  | 0   |
| 1950 10 18 18 12 NOT NAMED | 25.4 | 44.9 | 40  | 0   |
| 1950 10 19 0 12 NOT NAMED  | 25.9 | 44.8 | 45  | 0   |
| 1950 10 19 6 12 NOT NAMED  | 26.5 | 44.6 | 45  | 0   |
| 1950 10 19 12 12 NOT NAMED | 27.2 | 43.9 | 45  | 0   |
| 1950 10 19 18 12 NOT NAMED | 28.2 | 43.0 | 50  | 0   |
| 1950 10 20 0 12 NOT NAMED  | 29.2 | 42.0 | 50  | 0   |

|            |       |           |      |      |    |   |
|------------|-------|-----------|------|------|----|---|
| 1950 10 20 | 6 12  | NOT NAMED | 30.1 | 41.0 | 55 | 0 |
| 1950 10 20 | 12 12 | NOT NAMED | 30.8 | 40.0 | 55 | 0 |
| 1950 10 20 | 18 12 | NOT NAMED | 31.4 | 38.8 | 55 | 0 |
| 1950 10 21 | 0 12  | NOT NAMED | 32.0 | 37.6 | 60 | 0 |
| 1950 10 21 | 6 12  | NOT NAMED | 32.4 | 36.8 | 60 | 0 |
| 1950 10 21 | 12 12 | NOT NAMED | 33.0 | 36.0 | 60 | 0 |
| 1950 10 21 | 18 12 | NOT NAMED | 34.6 | 34.6 | 60 | 0 |
| 1950 10 22 | 0 12  | NOT NAMED | 36.4 | 32.9 | 60 | 0 |
| 1950 10 22 | 6 12  | NOT NAMED | 38.1 | 31.8 | 55 | 0 |
| 1950 10 22 | 12 12 | NOT NAMED | 39.6 | 29.2 | 55 | 0 |
| 1950 10 22 | 18 12 | NOT NAMED | 39.5 | 27.4 | 50 | 0 |
| 1950 10 23 | 0 12  | NOT NAMED | 38.6 | 25.9 | 50 | 0 |
| 1950 10 23 | 6 12  | NOT NAMED | 37.8 | 24.9 | 45 | 0 |
| 1950 10 23 | 12 12 | NOT NAMED | 37.0 | 24.0 | 40 | 0 |
| 1950 10 23 | 18 12 | NOT NAMED | 36.2 | 23.1 | 40 | 0 |
| 1950 10 24 | 0 12  | NOT NAMED | 35.4 | 22.4 | 35 | 0 |
| 1950 10 24 | 6 12  | NOT NAMED | 34.7 | 22.0 | 30 | 0 |
| 1950 10 24 | 12 12 | NOT NAMED | 34.0 | 21.7 | 30 | 0 |
| 1950 10 24 | 18 12 | NOT NAMED | 31.6 | 22.6 | 25 | 0 |
| 1950 10 18 | 0 13  | LOVE      | 27.5 | 89.2 | 35 | 0 |
| 1950 10 18 | 6 13  | LOVE      | 27.5 | 90.8 | 65 | 0 |
| 1950 10 18 | 12 13 | LOVE      | 27.0 | 91.9 | 70 | 0 |
| 1950 10 18 | 18 13 | LOVE      | 26.7 | 92.1 | 75 | 0 |
| 1950 10 19 | 0 13  | LOVE      | 26.5 | 92.2 | 75 | 0 |
| 1950 10 19 | 6 13  | LOVE      | 26.3 | 92.3 | 75 | 0 |
| 1950 10 19 | 12 13 | LOVE      | 26.1 | 92.2 | 80 | 0 |
| 1950 10 19 | 18 13 | LOVE      | 25.4 | 91.1 | 80 | 0 |
| 1950 10 20 | 0 13  | LOVE      | 25.3 | 89.4 | 80 | 0 |
| 1950 10 20 | 6 13  | LOVE      | 25.7 | 88.2 | 75 | 0 |
| 1950 10 20 | 12 13 | LOVE      | 26.1 | 87.0 | 75 | 0 |
| 1950 10 20 | 18 13 | LOVE      | 26.5 | 86.1 | 70 | 0 |
| 1950 10 21 | 0 13  | LOVE      | 27.1 | 85.2 | 70 | 0 |
| 1950 10 21 | 6 13  | LOVE      | 28.2 | 83.9 | 60 | 0 |
| 1950 10 21 | 12 13 | LOVE      | 29.8 | 83.0 | 35 | 0 |
| 1950 10 21 | 18 13 | LOVE      | 30.1 | 83.1 | 30 | 0 |
| 1951 5 15  | 6 1   | ABLE      | 28.0 | 64.6 | 25 | 0 |
| 1951 5 15  | 12 1  | ABLE      | 30.0 | 66.5 | 25 | 0 |
| 1951 5 15  | 18 1  | ABLE      | 30.8 | 67.1 | 25 | 0 |
| 1951 5 16  | 0 1   | ABLE      | 31.4 | 68.5 | 25 | 0 |
| 1951 5 16  | 6 1   | ABLE      | 31.9 | 70.8 | 30 | 0 |
| 1951 5 16  | 12 1  | ABLE      | 31.8 | 73.2 | 30 | 0 |
| 1951 5 16  | 18 1  | ABLE      | 31.0 | 75.3 | 35 | 0 |
| 1951 5 17  | 0 1   | ABLE      | 30.1 | 77.1 | 40 | 0 |
| 1951 5 17  | 6 1   | ABLE      | 29.4 | 78.2 | 55 | 0 |



|      |         |         |      |      |     |   |
|------|---------|---------|------|------|-----|---|
| 1951 | 5 17 12 | 1 ABLE  | 28.7 | 78.6 | 65  | 0 |
| 1951 | 5 17 18 | 1 ABLE  | 28.0 | 78.8 | 65  | 0 |
| 1951 | 5 18 0  | 1 ABLE  | 27.3 | 78.7 | 70  | 0 |
| 1951 | 5 18 6  | 1 ABLE  | 26.9 | 78.2 | 70  | 0 |
| 1951 | 5 18 12 | 1 ABLE  | 27.0 | 77.7 | 75  | 0 |
| 1951 | 5 18 18 | 1 ABLE  | 27.2 | 77.3 | 80  | 0 |
| 1951 | 5 19 0  | 1 ABLE  | 27.4 | 77.0 | 80  | 0 |
| 1951 | 5 19 6  | 1 ABLE  | 27.7 | 76.7 | 80  | 0 |
| 1951 | 5 19 12 | 1 ABLE  | 28.1 | 76.3 | 80  | 0 |
| 1951 | 5 19 18 | 1 ABLE  | 28.8 | 76.0 | 80  | 0 |
| 1951 | 5 20 0  | 1 ABLE  | 29.7 | 75.8 | 80  | 0 |
| 1951 | 5 20 6  | 1 ABLE  | 30.6 | 75.6 | 85  | 0 |
| 1951 | 5 20 12 | 1 ABLE  | 31.5 | 75.4 | 90  | 0 |
| 1951 | 5 20 18 | 1 ABLE  | 32.4 | 75.3 | 90  | 0 |
| 1951 | 5 21 0  | 1 ABLE  | 33.2 | 75.2 | 95  | 0 |
| 1951 | 5 21 6  | 1 ABLE  | 34.4 | 74.7 | 100 | 0 |
| 1951 | 5 21 12 | 1 ABLE  | 35.5 | 74.2 | 100 | 0 |
| 1951 | 5 21 18 | 1 ABLE  | 35.9 | 73.6 | 100 | 0 |
| 1951 | 5 22 0  | 1 ABLE  | 36.2 | 73.0 | 95  | 0 |
| 1951 | 5 22 6  | 1 ABLE  | 36.5 | 72.2 | 90  | 0 |
| 1951 | 5 22 12 | 1 ABLE  | 36.6 | 71.2 | 85  | 0 |
| 1951 | 5 22 18 | 1 ABLE  | 36.6 | 70.2 | 80  | 0 |
| 1951 | 5 23 0  | 1 ABLE  | 36.5 | 69.0 | 70  | 0 |
| 1951 | 5 23 6  | 1 ABLE  | 36.4 | 67.0 | 60  | 0 |
| 1951 | 5 23 12 | 1 ABLE  | 36.5 | 65.0 | 50  | 0 |
| 1951 | 5 23 18 | 1 ABLE  | 37.1 | 63.6 | 45  | 0 |
| 1951 | 5 24 0  | 1 ABLE  | 37.9 | 62.3 | 45  | 0 |
| 1951 | 5 24 6  | 1 ABLE  | 38.7 | 61.2 | 45  | 0 |
| 1951 | 5 24 12 | 1 ABLE  | 39.5 | 60.0 | 45  | 0 |
| 1951 | 5 24 18 | 1 ABLE  | 40.1 | 59.2 | 45  | 0 |
| 1951 | 8 2 6   | 2 BAKER | 21.0 | 52.0 | 25  | 0 |
| 1951 | 8 2 12  | 2 BAKER | 22.0 | 54.3 | 35  | 0 |
| 1951 | 8 2 18  | 2 BAKER | 22.7 | 55.4 | 40  | 0 |
| 1951 | 8 3 0   | 2 BAKER | 23.7 | 56.5 | 45  | 0 |
| 1951 | 8 3 6   | 2 BAKER | 24.9 | 57.5 | 50  | 0 |
| 1951 | 8 3 12  | 2 BAKER | 26.2 | 58.5 | 50  | 0 |
| 1951 | 8 3 18  | 2 BAKER | 27.4 | 59.3 | 50  | 0 |
| 1951 | 8 4 0   | 2 BAKER | 28.6 | 60.0 | 50  | 0 |
| 1951 | 8 4 6   | 2 BAKER | 29.9 | 60.5 | 45  | 0 |
| 1951 | 8 4 12  | 2 BAKER | 31.3 | 60.8 | 45  | 0 |
| 1951 | 8 4 18  | 2 BAKER | 32.8 | 61.0 | 40  | 0 |
| 1951 | 8 5 0   | 2 BAKER | 34.3 | 61.0 | 40  | 0 |
| 1951 | 8 5 6   | 2 BAKER | 35.4 | 60.9 | 35  | 0 |
| 1951 | 8 5 12  | 2 BAKER | 36.2 | 60.8 | 35  | 0 |

|      |   |    |    |   |         |      |      |     |     |
|------|---|----|----|---|---------|------|------|-----|-----|
| 1951 | 8 | 5  | 18 | 2 | BAKER   | 39.0 | 59.0 | 30  | 0   |
| 1951 | 8 | 12 | 6  | 3 | CHARLIE | 12.2 | 45.7 | 25  | 0   |
| 1951 | 8 | 12 | 12 | 3 | CHARLIE | 12.3 | 46.2 | 25  | 0   |
| 1951 | 8 | 12 | 18 | 3 | CHARLIE | 12.4 | 46.8 | 25  | 0   |
| 1951 | 8 | 13 | 0  | 3 | CHARLIE | 12.6 | 47.5 | 25  | 0   |
| 1951 | 8 | 13 | 6  | 3 | CHARLIE | 12.8 | 48.4 | 25  | 0   |
| 1951 | 8 | 13 | 12 | 3 | CHARLIE | 13.0 | 49.2 | 25  | 0   |
| 1951 | 8 | 13 | 18 | 3 | CHARLIE | 13.2 | 49.9 | 25  | 0   |
| 1951 | 8 | 14 | 0  | 3 | CHARLIE | 13.4 | 50.6 | 25  | 0   |
| 1951 | 8 | 14 | 6  | 3 | CHARLIE | 13.6 | 51.3 | 25  | 0   |
| 1951 | 8 | 14 | 12 | 3 | CHARLIE | 13.8 | 52.2 | 30  | 0   |
| 1951 | 8 | 14 | 18 | 3 | CHARLIE | 14.0 | 53.5 | 30  | 0   |
| 1951 | 8 | 15 | 0  | 3 | CHARLIE | 14.3 | 55.3 | 35  | 0   |
| 1951 | 8 | 15 | 6  | 3 | CHARLIE | 14.6 | 57.2 | 45  | 0   |
| 1951 | 8 | 15 | 12 | 3 | CHARLIE | 14.9 | 59.0 | 50  | 0   |
| 1951 | 8 | 15 | 18 | 3 | CHARLIE | 15.2 | 60.7 | 60  | 0   |
| 1951 | 8 | 16 | 0  | 3 | CHARLIE | 15.4 | 62.5 | 65  | 0   |
| 1951 | 8 | 16 | 6  | 3 | CHARLIE | 15.7 | 64.8 | 70  | 0   |
| 1951 | 8 | 16 | 12 | 3 | CHARLIE | 16.0 | 67.0 | 75  | 0   |
| 1951 | 8 | 16 | 18 | 3 | CHARLIE | 16.1 | 68.7 | 80  | 0   |
| 1951 | 8 | 17 | 0  | 3 | CHARLIE | 16.2 | 70.3 | 85  | 0   |
| 1951 | 8 | 17 | 6  | 3 | CHARLIE | 16.4 | 72.1 | 95  | 0   |
| 1951 | 8 | 17 | 12 | 3 | CHARLIE | 16.8 | 73.9 | 95  | 0   |
| 1951 | 8 | 17 | 18 | 3 | CHARLIE | 17.4 | 75.7 | 95  | 964 |
| 1951 | 8 | 18 | 0  | 3 | CHARLIE | 18.1 | 77.4 | 75  | 0   |
| 1951 | 8 | 18 | 6  | 3 | CHARLIE | 18.2 | 78.9 | 80  | 0   |
| 1951 | 8 | 18 | 12 | 3 | CHARLIE | 18.2 | 80.5 | 85  | 0   |
| 1951 | 8 | 18 | 18 | 3 | CHARLIE | 18.5 | 81.7 | 90  | 0   |
| 1951 | 8 | 19 | 0  | 3 | CHARLIE | 19.0 | 83.1 | 95  | 0   |
| 1951 | 8 | 19 | 6  | 3 | CHARLIE | 19.3 | 84.1 | 100 | 0   |
| 1951 | 8 | 19 | 12 | 3 | CHARLIE | 19.5 | 85.0 | 105 | 0   |
| 1951 | 8 | 19 | 18 | 3 | CHARLIE | 19.8 | 86.1 | 110 | 0   |
| 1951 | 8 | 20 | 0  | 3 | CHARLIE | 20.2 | 87.2 | 115 | 0   |
| 1951 | 8 | 20 | 6  | 3 | CHARLIE | 20.6 | 88.4 | 115 | 0   |
| 1951 | 8 | 20 | 12 | 3 | CHARLIE | 21.1 | 89.7 | 100 | 0   |
| 1951 | 8 | 20 | 18 | 3 | CHARLIE | 21.4 | 90.9 | 95  | 0   |
| 1951 | 8 | 21 | 0  | 3 | CHARLIE | 21.6 | 92.0 | 90  | 0   |
| 1951 | 8 | 21 | 6  | 3 | CHARLIE | 21.6 | 93.0 | 90  | 0   |
| 1951 | 8 | 21 | 12 | 3 | CHARLIE | 21.6 | 93.8 | 90  | 0   |
| 1951 | 8 | 21 | 18 | 3 | CHARLIE | 21.6 | 94.3 | 90  | 0   |
| 1951 | 8 | 22 | 0  | 3 | CHARLIE | 21.7 | 94.9 | 95  | 0   |
| 1951 | 8 | 22 | 6  | 3 | CHARLIE | 21.8 | 95.8 | 110 | 0   |
| 1951 | 8 | 22 | 12 | 3 | CHARLIE | 22.0 | 96.7 | 115 | 0   |
| 1951 | 8 | 22 | 18 | 3 | CHARLIE | 22.1 | 97.3 | 110 | 0   |

|      |      |    |           |      |      |     |   |
|------|------|----|-----------|------|------|-----|---|
| 1951 | 8 23 | 0  | 3 CHARLIE | 22.2 | 98.0 | 65  | 0 |
| 1951 | 8 23 | 6  | 3 CHARLIE | 22.3 | 98.7 | 45  | 0 |
| 1951 | 8 23 | 12 | 3 CHARLIE | 22.5 | 99.4 | 35  | 0 |
| 1951 | 8 23 | 18 | 3 CHARLIE | 21.9 | 99.9 | 25  | 0 |
| 1951 | 8 27 | 6  | 4 DOG     | 12.3 | 25.6 | 25  | 0 |
| 1951 | 8 27 | 12 | 4 DOG     | 12.3 | 26.6 | 25  | 0 |
| 1951 | 8 27 | 18 | 4 DOG     | 12.3 | 27.6 | 25  | 0 |
| 1951 | 8 28 | 0  | 4 DOG     | 12.2 | 28.7 | 25  | 0 |
| 1951 | 8 28 | 6  | 4 DOG     | 12.1 | 29.8 | 25  | 0 |
| 1951 | 8 28 | 12 | 4 DOG     | 12.0 | 31.0 | 25  | 0 |
| 1951 | 8 28 | 18 | 4 DOG     | 12.0 | 32.3 | 25  | 0 |
| 1951 | 8 29 | 0  | 4 DOG     | 12.0 | 33.6 | 25  | 0 |
| 1951 | 8 29 | 6  | 4 DOG     | 12.0 | 34.9 | 25  | 0 |
| 1951 | 8 29 | 12 | 4 DOG     | 12.1 | 36.3 | 25  | 0 |
| 1951 | 8 29 | 18 | 4 DOG     | 12.2 | 38.0 | 25  | 0 |
| 1951 | 8 30 | 0  | 4 DOG     | 12.4 | 39.7 | 25  | 0 |
| 1951 | 8 30 | 6  | 4 DOG     | 12.7 | 41.3 | 30  | 0 |
| 1951 | 8 30 | 12 | 4 DOG     | 13.0 | 43.0 | 30  | 0 |
| 1951 | 8 30 | 18 | 4 DOG     | 13.2 | 44.7 | 30  | 0 |
| 1951 | 8 31 | 0  | 4 DOG     | 13.4 | 46.5 | 35  | 0 |
| 1951 | 8 31 | 6  | 4 DOG     | 13.7 | 48.4 | 40  | 0 |
| 1951 | 8 31 | 12 | 4 DOG     | 14.0 | 50.2 | 45  | 0 |
| 1951 | 8 31 | 18 | 4 DOG     | 14.0 | 51.7 | 45  | 0 |
| 1951 | 9 1  | 0  | 4 DOG     | 14.0 | 53.2 | 50  | 0 |
| 1951 | 9 1  | 6  | 4 DOG     | 14.1 | 54.7 | 50  | 0 |
| 1951 | 9 1  | 12 | 4 DOG     | 14.1 | 56.2 | 55  | 0 |
| 1951 | 9 1  | 18 | 4 DOG     | 14.1 | 57.6 | 60  | 0 |
| 1951 | 9 2  | 0  | 4 DOG     | 14.1 | 58.8 | 65  | 0 |
| 1951 | 9 2  | 6  | 4 DOG     | 14.1 | 60.0 | 80  | 0 |
| 1951 | 9 2  | 12 | 4 DOG     | 14.1 | 61.3 | 95  | 0 |
| 1951 | 9 2  | 18 | 4 DOG     | 14.2 | 62.8 | 100 | 0 |
| 1951 | 9 3  | 0  | 4 DOG     | 14.3 | 64.4 | 100 | 0 |
| 1951 | 9 3  | 6  | 4 DOG     | 14.4 | 65.9 | 95  | 0 |
| 1951 | 9 3  | 12 | 4 DOG     | 14.6 | 67.4 | 90  | 0 |
| 1951 | 9 3  | 18 | 4 DOG     | 14.7 | 69.7 | 85  | 0 |
| 1951 | 9 4  | 0  | 4 DOG     | 14.8 | 71.8 | 80  | 0 |
| 1951 | 9 4  | 6  | 4 DOG     | 14.9 | 73.1 | 75  | 0 |
| 1951 | 9 4  | 12 | 4 DOG     | 15.1 | 74.3 | 60  | 0 |
| 1951 | 9 4  | 18 | 4 DOG     | 15.3 | 75.4 | 60  | 0 |
| 1951 | 9 5  | 0  | 4 DOG     | 15.4 | 76.5 | 50  | 0 |
| 1951 | 9 5  | 6  | 4 DOG     | 15.6 | 77.8 | 45  | 0 |
| 1951 | 9 5  | 12 | 4 DOG     | 15.7 | 79.1 | 35  | 0 |
| 1951 | 9 5  | 18 | 4 DOG     | 16.1 | 82.4 | 25  | 0 |
| 1951 | 9 2  | 18 | 5 EASY    | 14.0 | 37.0 | 40  | 0 |

|      |   |    |    |        |      |      |     |   |
|------|---|----|----|--------|------|------|-----|---|
| 1951 | 9 | 3  | 0  | 5 EASY | 15.7 | 39.6 | 40  | 0 |
| 1951 | 9 | 3  | 6  | 5 EASY | 16.3 | 41.1 | 55  | 0 |
| 1951 | 9 | 3  | 12 | 5 EASY | 16.6 | 42.6 | 65  | 0 |
| 1951 | 9 | 3  | 18 | 5 EASY | 16.7 | 43.8 | 70  | 0 |
| 1951 | 9 | 4  | 0  | 5 EASY | 16.6 | 44.9 | 75  | 0 |
| 1951 | 9 | 4  | 6  | 5 EASY | 16.7 | 45.9 | 80  | 0 |
| 1951 | 9 | 4  | 12 | 5 EASY | 17.0 | 47.0 | 85  | 0 |
| 1951 | 9 | 4  | 18 | 5 EASY | 17.8 | 48.7 | 90  | 0 |
| 1951 | 9 | 5  | 0  | 5 EASY | 18.7 | 50.5 | 95  | 0 |
| 1951 | 9 | 5  | 6  | 5 EASY | 19.7 | 52.1 | 95  | 0 |
| 1951 | 9 | 5  | 12 | 5 EASY | 20.6 | 53.7 | 100 | 0 |
| 1951 | 9 | 5  | 18 | 5 EASY | 21.1 | 55.5 | 100 | 0 |
| 1951 | 9 | 6  | 0  | 5 EASY | 21.5 | 57.3 | 105 | 0 |
| 1951 | 9 | 6  | 6  | 5 EASY | 21.9 | 59.3 | 105 | 0 |
| 1951 | 9 | 6  | 12 | 5 EASY | 22.3 | 61.2 | 110 | 0 |
| 1951 | 9 | 6  | 18 | 5 EASY | 22.7 | 62.5 | 120 | 0 |
| 1951 | 9 | 7  | 0  | 5 EASY | 23.0 | 63.7 | 130 | 0 |
| 1951 | 9 | 7  | 6  | 5 EASY | 23.4 | 64.9 | 135 | 0 |
| 1951 | 9 | 7  | 12 | 5 EASY | 24.0 | 66.0 | 140 | 0 |
| 1951 | 9 | 7  | 18 | 5 EASY | 24.8 | 67.0 | 140 | 0 |
| 1951 | 9 | 8  | 0  | 5 EASY | 25.8 | 67.6 | 140 | 0 |
| 1951 | 9 | 8  | 6  | 5 EASY | 27.1 | 67.8 | 135 | 0 |
| 1951 | 9 | 8  | 12 | 5 EASY | 28.3 | 67.4 | 130 | 0 |
| 1951 | 9 | 8  | 18 | 5 EASY | 29.2 | 66.7 | 120 | 0 |
| 1951 | 9 | 9  | 0  | 5 EASY | 29.9 | 66.0 | 115 | 0 |
| 1951 | 9 | 9  | 6  | 5 EASY | 30.3 | 65.3 | 100 | 0 |
| 1951 | 9 | 9  | 12 | 5 EASY | 30.8 | 64.4 | 95  | 0 |
| 1951 | 9 | 9  | 18 | 5 EASY | 32.0 | 62.7 | 90  | 0 |
| 1951 | 9 | 10 | 0  | 5 EASY | 33.2 | 60.8 | 85  | 0 |
| 1951 | 9 | 10 | 6  | 5 EASY | 34.1 | 59.7 | 85  | 0 |
| 1951 | 9 | 10 | 12 | 5 EASY | 35.0 | 58.5 | 85  | 0 |
| 1951 | 9 | 10 | 18 | 5 EASY | 36.2 | 57.1 | 80  | 0 |
| 1951 | 9 | 11 | 0  | 5 EASY | 37.3 | 55.7 | 80  | 0 |
| 1951 | 9 | 11 | 6  | 5 EASY | 38.1 | 54.1 | 75  | 0 |
| 1951 | 9 | 11 | 12 | 5 EASY | 38.6 | 52.6 | 70  | 0 |
| 1951 | 9 | 11 | 18 | 5 EASY | 38.9 | 51.3 | 70  | 0 |
| 1951 | 9 | 12 | 0  | 5 EASY | 39.0 | 49.9 | 65  | 0 |
| 1951 | 9 | 12 | 6  | 5 EASY | 39.0 | 48.4 | 65  | 0 |
| 1951 | 9 | 12 | 12 | 5 EASY | 39.0 | 46.9 | 65  | 0 |
| 1951 | 9 | 12 | 18 | 5 EASY | 39.0 | 45.5 | 65  | 0 |
| 1951 | 9 | 13 | 0  | 5 EASY | 39.6 | 43.8 | 65  | 0 |
| 1951 | 9 | 13 | 6  | 5 EASY | 40.8 | 41.5 | 60  | 0 |
| 1951 | 9 | 13 | 12 | 5 EASY | 42.0 | 39.3 | 50  | 0 |
| 1951 | 9 | 13 | 18 | 5 EASY | 45.8 | 37.4 | 45  | 0 |

|      |   |    |    |   |        |      |      |     |   |
|------|---|----|----|---|--------|------|------|-----|---|
| 1951 | 9 | 2  | 18 | 6 | FOX    | 13.0 | 20.0 | 25  | 0 |
| 1951 | 9 | 3  | 0  | 6 | FOX    | 11.8 | 23.5 | 25  | 0 |
| 1951 | 9 | 3  | 6  | 6 | FOX    | 11.6 | 24.8 | 30  | 0 |
| 1951 | 9 | 3  | 12 | 6 | FOX    | 11.5 | 26.0 | 30  | 0 |
| 1951 | 9 | 3  | 18 | 6 | FOX    | 11.5 | 27.5 | 30  | 0 |
| 1951 | 9 | 4  | 0  | 6 | FOX    | 11.8 | 29.0 | 35  | 0 |
| 1951 | 9 | 4  | 6  | 6 | FOX    | 12.4 | 30.5 | 40  | 0 |
| 1951 | 9 | 4  | 12 | 6 | FOX    | 13.0 | 32.0 | 45  | 0 |
| 1951 | 9 | 4  | 18 | 6 | FOX    | 13.7 | 33.3 | 55  | 0 |
| 1951 | 9 | 5  | 0  | 6 | FOX    | 14.4 | 34.6 | 60  | 0 |
| 1951 | 9 | 5  | 6  | 6 | FOX    | 15.2 | 36.2 | 70  | 0 |
| 1951 | 9 | 5  | 12 | 6 | FOX    | 16.0 | 37.8 | 75  | 0 |
| 1951 | 9 | 5  | 18 | 6 | FOX    | 16.5 | 39.0 | 75  | 0 |
| 1951 | 9 | 6  | 0  | 6 | FOX    | 17.1 | 40.1 | 80  | 0 |
| 1951 | 9 | 6  | 6  | 6 | FOX    | 17.6 | 41.4 | 85  | 0 |
| 1951 | 9 | 6  | 12 | 6 | FOX    | 18.2 | 43.0 | 90  | 0 |
| 1951 | 9 | 6  | 18 | 6 | FOX    | 19.2 | 45.5 | 90  | 0 |
| 1951 | 9 | 7  | 0  | 6 | FOX    | 20.3 | 48.2 | 95  | 0 |
| 1951 | 9 | 7  | 6  | 6 | FOX    | 21.0 | 49.5 | 95  | 0 |
| 1951 | 9 | 7  | 12 | 6 | FOX    | 21.7 | 50.7 | 100 | 0 |
| 1951 | 9 | 7  | 18 | 6 | FOX    | 23.0 | 53.1 | 100 | 0 |
| 1951 | 9 | 8  | 0  | 6 | FOX    | 24.4 | 55.2 | 100 | 0 |
| 1951 | 9 | 8  | 6  | 6 | FOX    | 25.2 | 56.4 | 95  | 0 |
| 1951 | 9 | 8  | 12 | 6 | FOX    | 26.4 | 57.5 | 95  | 0 |
| 1951 | 9 | 8  | 18 | 6 | FOX    | 29.2 | 58.8 | 95  | 0 |
| 1951 | 9 | 9  | 0  | 6 | FOX    | 32.4 | 60.0 | 90  | 0 |
| 1951 | 9 | 9  | 6  | 6 | FOX    | 35.3 | 59.8 | 90  | 0 |
| 1951 | 9 | 9  | 12 | 6 | FOX    | 38.0 | 58.0 | 85  | 0 |
| 1951 | 9 | 9  | 18 | 6 | FOX    | 40.0 | 54.6 | 85  | 0 |
| 1951 | 9 | 10 | 0  | 6 | FOX    | 42.0 | 50.5 | 75  | 0 |
| 1951 | 9 | 10 | 6  | 6 | FOX    | 44.5 | 43.9 | 75  | 0 |
| 1951 | 9 | 10 | 12 | 6 | FOX    | 47.0 | 37.0 | 70  | 0 |
| 1951 | 9 | 10 | 18 | 6 | FOX    | 49.6 | 29.9 | 65  | 0 |
| 1951 | 9 | 11 | 0  | 6 | FOX    | 52.4 | 22.8 | 60  | 0 |
| 1951 | 9 | 11 | 6  | 6 | FOX    | 55.5 | 21.1 | 55  | 0 |
| 1951 | 9 | 11 | 12 | 6 | FOX    | 59.0 | 23.2 | 45  | 0 |
| 1951 | 9 | 20 | 6  | 7 | GEORGE | 19.8 | 93.0 | 35  | 0 |
| 1951 | 9 | 20 | 12 | 7 | GEORGE | 20.6 | 94.7 | 45  | 0 |
| 1951 | 9 | 20 | 18 | 7 | GEORGE | 20.8 | 95.2 | 50  | 0 |
| 1951 | 9 | 21 | 0  | 7 | GEORGE | 20.9 | 95.7 | 50  | 0 |
| 1951 | 9 | 21 | 6  | 7 | GEORGE | 21.0 | 96.2 | 50  | 0 |
| 1951 | 9 | 21 | 12 | 7 | GEORGE | 21.2 | 96.7 | 45  | 0 |
| 1951 | 9 | 21 | 18 | 7 | GEORGE | 21.5 | 97.5 | 35  | 0 |
| 1951 | 9 | 28 | 6  | 8 | HOW    | 18.7 | 84.8 | 25  | 0 |

|      |    |    |    |   |      |      |      |    |   |
|------|----|----|----|---|------|------|------|----|---|
| 1951 | 9  | 28 | 12 | 8 | HOW  | 19.0 | 85.0 | 25 | 0 |
| 1951 | 9  | 28 | 18 | 8 | HOW  | 19.6 | 85.3 | 25 | 0 |
| 1951 | 9  | 29 | 0  | 8 | HOW  | 20.3 | 85.7 | 25 | 0 |
| 1951 | 9  | 29 | 6  | 8 | HOW  | 21.3 | 86.3 | 25 | 0 |
| 1951 | 9  | 29 | 12 | 8 | HOW  | 22.2 | 86.8 | 25 | 0 |
| 1951 | 9  | 29 | 18 | 8 | HOW  | 22.8 | 87.1 | 25 | 0 |
| 1951 | 9  | 30 | 0  | 8 | HOW  | 23.3 | 87.3 | 25 | 0 |
| 1951 | 9  | 30 | 6  | 8 | HOW  | 23.8 | 87.4 | 25 | 0 |
| 1951 | 9  | 30 | 12 | 8 | HOW  | 24.3 | 87.5 | 25 | 0 |
| 1951 | 9  | 30 | 18 | 8 | HOW  | 24.9 | 87.6 | 30 | 0 |
| 1951 | 10 | 1  | 0  | 8 | HOW  | 25.4 | 87.7 | 30 | 0 |
| 1951 | 10 | 1  | 6  | 8 | HOW  | 25.8 | 87.5 | 30 | 0 |
| 1951 | 10 | 1  | 12 | 8 | HOW  | 26.1 | 86.8 | 35 | 0 |
| 1951 | 10 | 1  | 18 | 8 | HOW  | 26.3 | 86.0 | 40 | 0 |
| 1951 | 10 | 2  | 0  | 8 | HOW  | 26.4 | 84.8 | 45 | 0 |
| 1951 | 10 | 2  | 6  | 8 | HOW  | 26.6 | 83.3 | 55 | 0 |
| 1951 | 10 | 2  | 12 | 8 | HOW  | 26.8 | 81.7 | 60 | 0 |
| 1951 | 10 | 2  | 18 | 8 | HOW  | 27.6 | 80.2 | 60 | 0 |
| 1951 | 10 | 3  | 0  | 8 | HOW  | 29.0 | 78.8 | 65 | 0 |
| 1951 | 10 | 3  | 6  | 8 | HOW  | 30.6 | 77.6 | 75 | 0 |
| 1951 | 10 | 3  | 12 | 8 | HOW  | 32.0 | 76.7 | 80 | 0 |
| 1951 | 10 | 3  | 18 | 8 | HOW  | 32.6 | 76.2 | 85 | 0 |
| 1951 | 10 | 4  | 0  | 8 | HOW  | 33.2 | 75.8 | 90 | 0 |
| 1951 | 10 | 4  | 6  | 8 | HOW  | 33.9 | 75.2 | 95 | 0 |
| 1951 | 10 | 4  | 12 | 8 | HOW  | 34.6 | 74.5 | 95 | 0 |
| 1951 | 10 | 4  | 18 | 8 | HOW  | 35.1 | 73.8 | 95 | 0 |
| 1951 | 10 | 5  | 0  | 8 | HOW  | 35.7 | 73.0 | 90 | 0 |
| 1951 | 10 | 5  | 6  | 8 | HOW  | 36.4 | 72.2 | 90 | 0 |
| 1951 | 10 | 5  | 12 | 8 | HOW  | 37.1 | 71.3 | 90 | 0 |
| 1951 | 10 | 5  | 18 | 8 | HOW  | 37.7 | 70.2 | 85 | 0 |
| 1951 | 10 | 6  | 0  | 8 | HOW  | 38.3 | 69.0 | 80 | 0 |
| 1951 | 10 | 6  | 6  | 8 | HOW  | 38.9 | 67.8 | 75 | 0 |
| 1951 | 10 | 6  | 12 | 8 | HOW  | 39.5 | 65.7 | 75 | 0 |
| 1951 | 10 | 6  | 18 | 8 | HOW  | 40.3 | 60.9 | 70 | 0 |
| 1951 | 10 | 7  | 0  | 8 | HOW  | 41.2 | 55.3 | 65 | 0 |
| 1951 | 10 | 7  | 6  | 8 | HOW  | 41.9 | 50.7 | 60 | 0 |
| 1951 | 10 | 7  | 12 | 8 | HOW  | 42.6 | 46.0 | 60 | 0 |
| 1951 | 10 | 7  | 18 | 8 | HOW  | 43.6 | 40.9 | 55 | 0 |
| 1951 | 10 | 8  | 0  | 8 | HOW  | 45.2 | 35.9 | 50 | 0 |
| 1951 | 10 | 8  | 6  | 8 | HOW  | 48.3 | 31.2 | 45 | 0 |
| 1951 | 10 | 8  | 12 | 8 | HOW  | 53.3 | 26.8 | 45 | 0 |
| 1951 | 10 | 12 | 6  | 9 | ITEM | 14.3 | 78.2 | 30 | 0 |
| 1951 | 10 | 12 | 12 | 9 | ITEM | 15.0 | 78.8 | 30 | 0 |
| 1951 | 10 | 12 | 18 | 9 | ITEM | 15.6 | 79.5 | 30 | 0 |

|                        |      |      |    |   |
|------------------------|------|------|----|---|
| 1951 10 13 0 9 ITEM    | 16.2 | 80.2 | 35 | 0 |
| 1951 10 13 6 9 ITEM    | 16.7 | 81.0 | 45 | 0 |
| 1951 10 13 12 9 ITEM   | 17.3 | 81.8 | 50 | 0 |
| 1951 10 13 18 9 ITEM   | 17.9 | 82.2 | 60 | 0 |
| 1951 10 14 0 9 ITEM    | 18.5 | 82.1 | 65 | 0 |
| 1951 10 14 6 9 ITEM    | 19.1 | 81.8 | 70 | 0 |
| 1951 10 14 12 9 ITEM   | 19.7 | 81.5 | 70 | 0 |
| 1951 10 14 18 9 ITEM   | 20.1 | 81.3 | 70 | 0 |
| 1951 10 15 0 9 ITEM    | 20.4 | 81.2 | 65 | 0 |
| 1951 10 15 6 9 ITEM    | 20.7 | 81.3 | 55 | 0 |
| 1951 10 15 12 9 ITEM   | 20.9 | 81.6 | 55 | 0 |
| 1951 10 15 18 9 ITEM   | 21.0 | 82.0 | 50 | 0 |
| 1951 10 16 0 9 ITEM    | 21.1 | 82.3 | 50 | 0 |
| 1951 10 16 6 9 ITEM    | 21.1 | 82.6 | 45 | 0 |
| 1951 10 16 12 9 ITEM   | 21.2 | 82.9 | 40 | 0 |
| 1951 10 16 18 9 ITEM   | 21.5 | 83.2 | 40 | 0 |
| 1951 10 17 0 9 ITEM    | 22.0 | 83.3 | 35 | 0 |
| 1951 10 17 6 9 ITEM    | 22.5 | 83.4 | 30 | 0 |
| 1951 10 17 12 9 ITEM   | 23.0 | 83.5 | 25 | 0 |
| 1951 10 17 18 9 ITEM   | 23.6 | 83.6 | 25 | 0 |
| 1951 10 15 6 10 JIG    | 28.1 | 75.6 | 35 | 0 |
| 1951 10 15 12 10 JIG   | 29.4 | 75.3 | 65 | 0 |
| 1951 10 15 18 10 JIG   | 30.6 | 74.8 | 70 | 0 |
| 1951 10 16 0 10 JIG    | 31.4 | 74.2 | 70 | 0 |
| 1951 10 16 6 10 JIG    | 31.9 | 73.6 | 70 | 0 |
| 1951 10 16 12 10 JIG   | 32.2 | 73.0 | 60 | 0 |
| 1951 10 16 18 10 JIG   | 32.4 | 72.3 | 55 | 0 |
| 1951 10 17 0 10 JIG    | 32.7 | 71.6 | 55 | 0 |
| 1951 10 17 6 10 JIG    | 33.1 | 70.7 | 50 | 0 |
| 1951 10 17 12 10 JIG   | 33.5 | 69.9 | 50 | 0 |
| 1951 10 17 18 10 JIG   | 33.9 | 69.8 | 50 | 0 |
| 1951 10 18 0 10 JIG    | 34.2 | 70.4 | 50 | 0 |
| 1951 10 18 6 10 JIG    | 34.2 | 71.3 | 45 | 0 |
| 1951 10 18 12 10 JIG   | 34.0 | 72.2 | 45 | 0 |
| 1951 10 18 18 10 JIG   | 33.5 | 72.5 | 40 | 0 |
| 1951 10 19 0 10 JIG    | 32.8 | 72.6 | 40 | 0 |
| 1951 10 19 6 10 JIG    | 31.9 | 72.3 | 40 | 0 |
| 1951 10 19 12 10 JIG   | 31.0 | 71.8 | 40 | 0 |
| 1951 10 19 18 10 JIG   | 30.3 | 71.1 | 40 | 0 |
| 1951 10 20 0 10 JIG    | 29.8 | 70.7 | 35 | 0 |
| 1951 10 20 6 10 JIG    | 29.4 | 69.9 | 30 | 0 |
| 1951 10 20 12 10 JIG   | 29.2 | 69.3 | 25 | 0 |
| 1951 10 20 18 10 JIG   | 29.0 | 65.0 | 25 | 0 |
| 1952 2 2 6 1 NOT NAMED | 17.5 | 87.2 | 30 | 0 |

|      |   |    |    |             |      |      |    |      |
|------|---|----|----|-------------|------|------|----|------|
| 1952 | 2 | 2  | 12 | 1 NOT NAMED | 20.2 | 87.4 | 35 | 0    |
| 1952 | 2 | 2  | 18 | 1 NOT NAMED | 22.0 | 85.5 | 35 | 0    |
| 1952 | 2 | 3  | 0  | 1 NOT NAMED | 24.0 | 82.6 | 35 | 0    |
| 1952 | 2 | 3  | 6  | 1 NOT NAMED | 26.2 | 80.4 | 45 | 0    |
| 1952 | 2 | 3  | 12 | 1 NOT NAMED | 28.5 | 78.4 | 45 | 0    |
| 1952 | 2 | 3  | 18 | 1 NOT NAMED | 30.7 | 77.0 | 45 | 0    |
| 1952 | 2 | 4  | 0  | 1 NOT NAMED | 32.9 | 75.6 | 45 | 0    |
| 1952 | 2 | 4  | 6  | 1 NOT NAMED | 35.7 | 73.7 | 50 | 0    |
| 1952 | 2 | 4  | 12 | 1 NOT NAMED | 38.8 | 71.8 | 50 | 0    |
| 1952 | 2 | 4  | 18 | 1 NOT NAMED | 41.6 | 69.9 | 50 | 0    |
| 1952 | 2 | 5  | 0  | 1 NOT NAMED | 44.4 | 68.0 | 45 | 0    |
| 1952 | 2 | 5  | 6  | 1 NOT NAMED | 47.4 | 67.2 | 40 | 0    |
| 1952 | 8 | 18 | 6  | 2 ABLE      | 14.6 | 19.0 | 25 | 0    |
| 1952 | 8 | 18 | 12 | 2 ABLE      | 14.4 | 19.6 | 25 | 0    |
| 1952 | 8 | 18 | 18 | 2 ABLE      | 14.3 | 19.8 | 25 | 0    |
| 1952 | 8 | 19 | 0  | 2 ABLE      | 14.1 | 20.9 | 25 | 0    |
| 1952 | 8 | 19 | 6  | 2 ABLE      | 13.9 | 21.5 | 25 | 0    |
| 1952 | 8 | 19 | 12 | 2 ABLE      | 13.7 | 22.6 | 25 | 0    |
| 1952 | 8 | 19 | 18 | 2 ABLE      | 13.4 | 23.6 | 25 | 0    |
| 1952 | 8 | 20 | 0  | 2 ABLE      | 13.2 | 24.7 | 25 | 0    |
| 1952 | 8 | 20 | 6  | 2 ABLE      | 13.0 | 25.9 | 25 | 0    |
| 1952 | 8 | 20 | 12 | 2 ABLE      | 12.8 | 27.2 | 25 | 0    |
| 1952 | 8 | 20 | 18 | 2 ABLE      | 12.6 | 28.3 | 25 | 0    |
| 1952 | 8 | 21 | 0  | 2 ABLE      | 12.4 | 29.4 | 25 | 0    |
| 1952 | 8 | 21 | 6  | 2 ABLE      | 12.3 | 30.7 | 25 | 0    |
| 1952 | 8 | 21 | 12 | 2 ABLE      | 12.3 | 32.1 | 25 | 0    |
| 1952 | 8 | 21 | 18 | 2 ABLE      | 12.3 | 33.4 | 25 | 0    |
| 1952 | 8 | 22 | 0  | 2 ABLE      | 12.3 | 34.6 | 25 | 0    |
| 1952 | 8 | 22 | 6  | 2 ABLE      | 12.3 | 35.4 | 25 | 0    |
| 1952 | 8 | 22 | 12 | 2 ABLE      | 12.3 | 36.5 | 25 | 0    |
| 1952 | 8 | 22 | 18 | 2 ABLE      | 12.5 | 38.1 | 25 | 0    |
| 1952 | 8 | 23 | 0  | 2 ABLE      | 12.9 | 39.8 | 25 | 0    |
| 1952 | 8 | 23 | 6  | 2 ABLE      | 13.3 | 41.5 | 25 | 0    |
| 1952 | 8 | 23 | 12 | 2 ABLE      | 13.7 | 43.1 | 25 | 0    |
| 1952 | 8 | 23 | 18 | 2 ABLE      | 14.3 | 44.7 | 25 | 0    |
| 1952 | 8 | 24 | 0  | 2 ABLE      | 14.9 | 46.3 | 25 | 0    |
| 1952 | 8 | 24 | 6  | 2 ABLE      | 15.3 | 47.7 | 25 | 0    |
| 1952 | 8 | 24 | 12 | 2 ABLE      | 15.8 | 49.1 | 30 | 0    |
| 1952 | 8 | 24 | 18 | 2 ABLE      | 16.4 | 51.2 | 35 | 0    |
| 1952 | 8 | 25 | 0  | 2 ABLE      | 17.0 | 53.5 | 40 | 0    |
| 1952 | 8 | 25 | 6  | 2 ABLE      | 17.7 | 55.5 | 40 | 0    |
| 1952 | 8 | 25 | 12 | 2 ABLE      | 18.4 | 57.1 | 45 | 0    |
| 1952 | 8 | 25 | 18 | 2 ABLE      | 19.0 | 58.1 | 45 | 0    |
| 1952 | 8 | 26 | 0  | 2 ABLE      | 19.6 | 59.1 | 50 | 1006 |



|      |      |    |   |       |      |      |     |      |
|------|------|----|---|-------|------|------|-----|------|
| 1952 | 8 26 | 6  | 2 | ABLE  | 20.1 | 60.3 | 50  | 0    |
| 1952 | 8 26 | 12 | 2 | ABLE  | 20.6 | 61.4 | 50  | 0    |
| 1952 | 8 26 | 18 | 2 | ABLE  | 20.9 | 62.2 | 55  | 0    |
| 1952 | 8 27 | 0  | 2 | ABLE  | 21.2 | 62.9 | 60  | 0    |
| 1952 | 8 27 | 6  | 2 | ABLE  | 21.5 | 63.7 | 60  | 0    |
| 1952 | 8 27 | 12 | 2 | ABLE  | 21.9 | 64.7 | 70  | 1003 |
| 1952 | 8 27 | 18 | 2 | ABLE  | 22.3 | 65.8 | 70  | 998  |
| 1952 | 8 28 | 0  | 2 | ABLE  | 23.0 | 67.1 | 75  | 0    |
| 1952 | 8 28 | 6  | 2 | ABLE  | 23.8 | 68.5 | 75  | 0    |
| 1952 | 8 28 | 12 | 2 | ABLE  | 24.7 | 69.8 | 75  | 0    |
| 1952 | 8 28 | 18 | 2 | ABLE  | 25.5 | 71.0 | 75  | 0    |
| 1952 | 8 29 | 0  | 2 | ABLE  | 26.3 | 72.2 | 75  | 0    |
| 1952 | 8 29 | 6  | 2 | ABLE  | 27.1 | 73.4 | 75  | 0    |
| 1952 | 8 29 | 12 | 2 | ABLE  | 27.8 | 74.7 | 80  | 0    |
| 1952 | 8 29 | 18 | 2 | ABLE  | 28.5 | 76.2 | 80  | 0    |
| 1952 | 8 30 | 0  | 2 | ABLE  | 29.2 | 77.8 | 80  | 0    |
| 1952 | 8 30 | 6  | 2 | ABLE  | 29.5 | 79.0 | 85  | 0    |
| 1952 | 8 30 | 12 | 2 | ABLE  | 29.8 | 79.7 | 85  | 0    |
| 1952 | 8 30 | 18 | 2 | ABLE  | 30.7 | 80.1 | 85  | 0    |
| 1952 | 8 31 | 0  | 2 | ABLE  | 31.8 | 80.5 | 90  | 0    |
| 1952 | 8 31 | 6  | 2 | ABLE  | 33.1 | 80.8 | 70  | 0    |
| 1952 | 8 31 | 12 | 2 | ABLE  | 34.4 | 81.0 | 45  | 0    |
| 1952 | 8 31 | 18 | 2 | ABLE  | 35.8 | 80.6 | 40  | 0    |
| 1952 | 9 1  | 0  | 2 | ABLE  | 37.2 | 79.7 | 40  | 0    |
| 1952 | 9 1  | 6  | 2 | ABLE  | 38.3 | 78.6 | 35  | 0    |
| 1952 | 9 1  | 12 | 2 | ABLE  | 39.3 | 77.1 | 35  | 0    |
| 1952 | 9 1  | 18 | 2 | ABLE  | 40.9 | 74.8 | 30  | 0    |
| 1952 | 9 2  | 0  | 2 | ABLE  | 42.3 | 72.7 | 30  | 0    |
| 1952 | 9 2  | 6  | 2 | ABLE  | 43.0 | 71.5 | 25  | 0    |
| 1952 | 9 2  | 12 | 2 | ABLE  | 43.7 | 70.4 | 25  | 0    |
| 1952 | 9 2  | 18 | 2 | ABLE  | 44.4 | 69.4 | 25  | 0    |
| 1952 | 8 31 | 6  | 3 | BAKER | 16.7 | 58.4 | 60  | 0    |
| 1952 | 8 31 | 12 | 3 | BAKER | 17.3 | 58.7 | 60  | 0    |
| 1952 | 8 31 | 18 | 3 | BAKER | 17.8 | 59.0 | 60  | 0    |
| 1952 | 9 1  | 0  | 3 | BAKER | 18.2 | 59.3 | 65  | 0    |
| 1952 | 9 1  | 6  | 3 | BAKER | 18.6 | 59.5 | 70  | 1003 |
| 1952 | 9 1  | 12 | 3 | BAKER | 19.0 | 59.8 | 75  | 0    |
| 1952 | 9 1  | 18 | 3 | BAKER | 19.9 | 60.3 | 80  | 1003 |
| 1952 | 9 2  | 0  | 3 | BAKER | 21.0 | 61.0 | 85  | 0    |
| 1952 | 9 2  | 6  | 3 | BAKER | 21.9 | 61.9 | 90  | 0    |
| 1952 | 9 2  | 12 | 3 | BAKER | 22.8 | 63.0 | 95  | 0    |
| 1952 | 9 2  | 18 | 3 | BAKER | 23.7 | 64.2 | 95  | 0    |
| 1952 | 9 3  | 0  | 3 | BAKER | 24.5 | 65.3 | 100 | 0    |
| 1952 | 9 3  | 6  | 3 | BAKER | 25.2 | 66.4 | 100 | 0    |

|      |   |    |    |   |         |      |      |     |     |
|------|---|----|----|---|---------|------|------|-----|-----|
| 1952 | 9 | 3  | 12 | 3 | BAKER   | 25.9 | 67.4 | 100 | 993 |
| 1952 | 9 | 3  | 18 | 3 | BAKER   | 26.8 | 68.4 | 105 | 0   |
| 1952 | 9 | 4  | 0  | 3 | BAKER   | 27.7 | 69.4 | 105 | 0   |
| 1952 | 9 | 4  | 6  | 3 | BAKER   | 28.7 | 70.2 | 105 | 0   |
| 1952 | 9 | 4  | 12 | 3 | BAKER   | 29.7 | 70.7 | 105 | 0   |
| 1952 | 9 | 4  | 18 | 3 | BAKER   | 30.7 | 71.1 | 105 | 0   |
| 1952 | 9 | 5  | 0  | 3 | BAKER   | 31.6 | 71.3 | 105 | 0   |
| 1952 | 9 | 5  | 6  | 3 | BAKER   | 32.4 | 71.2 | 105 | 0   |
| 1952 | 9 | 5  | 12 | 3 | BAKER   | 33.0 | 71.0 | 105 | 0   |
| 1952 | 9 | 5  | 18 | 3 | BAKER   | 33.5 | 70.6 | 100 | 0   |
| 1952 | 9 | 6  | 0  | 3 | BAKER   | 33.9 | 70.2 | 100 | 0   |
| 1952 | 9 | 6  | 6  | 3 | BAKER   | 34.3 | 69.9 | 100 | 0   |
| 1952 | 9 | 6  | 12 | 3 | BAKER   | 34.8 | 69.6 | 95  | 981 |
| 1952 | 9 | 6  | 18 | 3 | BAKER   | 35.8 | 68.6 | 95  | 0   |
| 1952 | 9 | 7  | 0  | 3 | BAKER   | 36.9 | 67.1 | 90  | 0   |
| 1952 | 9 | 7  | 6  | 3 | BAKER   | 38.0 | 65.7 | 85  | 0   |
| 1952 | 9 | 7  | 12 | 3 | BAKER   | 39.0 | 64.0 | 80  | 0   |
| 1952 | 9 | 7  | 18 | 3 | BAKER   | 40.4 | 61.1 | 75  | 969 |
| 1952 | 9 | 8  | 0  | 3 | BAKER   | 42.5 | 57.4 | 70  | 0   |
| 1952 | 9 | 8  | 6  | 3 | BAKER   | 45.6 | 51.7 | 65  | 0   |
| 1952 | 9 | 8  | 12 | 3 | BAKER   | 47.8 | 49.3 | 60  | 0   |
| 1952 | 9 | 8  | 18 | 3 | BAKER   | 50.0 | 47.7 | 55  | 0   |
| 1952 | 9 | 9  | 0  | 3 | BAKER   | 52.0 | 47.0 | 50  | 0   |
| 1952 | 9 | 9  | 6  | 3 | BAKER   | 53.9 | 46.5 | 50  | 0   |
| 1952 | 9 | 9  | 12 | 3 | BAKER   | 55.8 | 45.9 | 45  | 0   |
| 1952 | 9 | 9  | 18 | 3 | BAKER   | 57.6 | 45.8 | 45  | 0   |
| 1952 | 9 | 22 | 6  | 4 | CHARLIE | 14.4 | 62.2 | 25  | 0   |
| 1952 | 9 | 22 | 12 | 4 | CHARLIE | 15.1 | 64.9 | 25  | 0   |
| 1952 | 9 | 22 | 18 | 4 | CHARLIE | 15.4 | 65.9 | 30  | 0   |
| 1952 | 9 | 23 | 0  | 4 | CHARLIE | 16.0 | 66.8 | 30  | 0   |
| 1952 | 9 | 23 | 6  | 4 | CHARLIE | 16.8 | 67.6 | 35  | 0   |
| 1952 | 9 | 23 | 12 | 4 | CHARLIE | 17.7 | 68.4 | 35  | 0   |
| 1952 | 9 | 23 | 18 | 4 | CHARLIE | 18.5 | 69.1 | 35  | 0   |
| 1952 | 9 | 24 | 0  | 4 | CHARLIE | 19.3 | 69.8 | 35  | 0   |
| 1952 | 9 | 24 | 6  | 4 | CHARLIE | 20.2 | 70.6 | 40  | 0   |
| 1952 | 9 | 24 | 12 | 4 | CHARLIE | 21.2 | 71.4 | 45  | 0   |
| 1952 | 9 | 24 | 18 | 4 | CHARLIE | 22.2 | 72.2 | 55  | 0   |
| 1952 | 9 | 25 | 0  | 4 | CHARLIE | 23.3 | 73.0 | 60  | 0   |
| 1952 | 9 | 25 | 6  | 4 | CHARLIE | 24.5 | 73.8 | 70  | 0   |
| 1952 | 9 | 25 | 12 | 4 | CHARLIE | 25.6 | 74.7 | 85  | 0   |
| 1952 | 9 | 25 | 18 | 4 | CHARLIE | 26.5 | 75.1 | 90  | 993 |
| 1952 | 9 | 26 | 0  | 4 | CHARLIE | 27.3 | 75.0 | 100 | 0   |
| 1952 | 9 | 26 | 6  | 4 | CHARLIE | 28.2 | 74.8 | 105 | 0   |
| 1952 | 9 | 26 | 12 | 4 | CHARLIE | 29.1 | 74.1 | 105 | 0   |

|      |         |           |      |      |     |     |
|------|---------|-----------|------|------|-----|-----|
| 1952 | 9 26 18 | 4 CHARLIE | 30.3 | 72.4 | 105 | 0   |
| 1952 | 9 27 0  | 4 CHARLIE | 31.7 | 70.6 | 105 | 0   |
| 1952 | 9 27 6  | 4 CHARLIE | 32.6 | 69.5 | 100 | 0   |
| 1952 | 9 27 12 | 4 CHARLIE | 33.6 | 68.1 | 100 | 0   |
| 1952 | 9 27 18 | 4 CHARLIE | 35.2 | 65.7 | 95  | 0   |
| 1952 | 9 28 0  | 4 CHARLIE | 36.9 | 63.2 | 95  | 0   |
| 1952 | 9 28 6  | 4 CHARLIE | 38.4 | 60.8 | 90  | 0   |
| 1952 | 9 28 12 | 4 CHARLIE | 39.5 | 58.6 | 85  | 0   |
| 1952 | 9 28 18 | 4 CHARLIE | 40.0 | 56.9 | 85  | 0   |
| 1952 | 9 29 0  | 4 CHARLIE | 40.3 | 55.5 | 80  | 0   |
| 1952 | 9 29 6  | 4 CHARLIE | 40.7 | 54.1 | 75  | 0   |
| 1952 | 9 29 12 | 4 CHARLIE | 40.8 | 52.7 | 70  | 0   |
| 1952 | 9 29 18 | 4 CHARLIE | 40.5 | 51.0 | 65  | 0   |
| 1952 | 9 30 0  | 4 CHARLIE | 40.2 | 49.4 | 60  | 0   |
| 1952 | 9 30 6  | 4 CHARLIE | 39.8 | 48.2 | 55  | 0   |
| 1952 | 9 30 12 | 4 CHARLIE | 39.5 | 47.0 | 50  | 0   |
| 1952 | 9 30 18 | 4 CHARLIE | 39.2 | 45.5 | 50  | 0   |
| 1952 | 10 1 0  | 4 CHARLIE | 39.7 | 44.0 | 45  | 0   |
| 1952 | 10 1 6  | 4 CHARLIE | 40.6 | 42.5 | 45  | 0   |
| 1952 | 10 1 12 | 4 CHARLIE | 42.2 | 41.1 | 40  | 0   |
| 1952 | 9 25 6  | 5 DOG     | 14.0 | 51.0 | 50  | 0   |
| 1952 | 9 25 12 | 5 DOG     | 14.8 | 51.6 | 50  | 0   |
| 1952 | 9 25 18 | 5 DOG     | 15.2 | 51.9 | 50  | 0   |
| 1952 | 9 26 0  | 5 DOG     | 15.5 | 52.3 | 55  | 0   |
| 1952 | 9 26 6  | 5 DOG     | 15.9 | 52.8 | 55  | 0   |
| 1952 | 9 26 12 | 5 DOG     | 16.2 | 53.4 | 60  | 0   |
| 1952 | 9 26 18 | 5 DOG     | 16.6 | 54.0 | 70  | 998 |
| 1952 | 9 27 0  | 5 DOG     | 17.0 | 54.6 | 75  | 0   |
| 1952 | 9 27 6  | 5 DOG     | 17.5 | 55.0 | 70  | 0   |
| 1952 | 9 27 12 | 5 DOG     | 18.0 | 55.4 | 55  | 0   |
| 1952 | 9 27 18 | 5 DOG     | 18.7 | 55.9 | 45  | 0   |
| 1952 | 9 28 0  | 5 DOG     | 19.3 | 56.4 | 40  | 0   |
| 1952 | 9 28 6  | 5 DOG     | 19.8 | 56.9 | 40  | 0   |
| 1952 | 9 28 12 | 5 DOG     | 20.2 | 57.3 | 40  | 0   |
| 1952 | 9 28 18 | 5 DOG     | 20.7 | 57.7 | 35  | 0   |
| 1952 | 9 29 0  | 5 DOG     | 21.3 | 58.1 | 35  | 0   |
| 1952 | 9 29 6  | 5 DOG     | 21.7 | 58.7 | 35  | 0   |
| 1952 | 10 6 12 | 6 EASY    | 15.2 | 51.0 | 30  | 0   |
| 1952 | 10 6 18 | 6 EASY    | 15.3 | 51.0 | 30  | 0   |
| 1952 | 10 7 0  | 6 EASY    | 15.5 | 51.0 | 35  | 0   |
| 1952 | 10 7 6  | 6 EASY    | 15.7 | 51.0 | 35  | 0   |
| 1952 | 10 7 12 | 6 EASY    | 16.0 | 51.0 | 40  | 0   |
| 1952 | 10 7 18 | 6 EASY    | 16.3 | 51.0 | 45  | 995 |
| 1952 | 10 8 0  | 6 EASY    | 16.7 | 51.0 | 50  | 0   |

|                      |      |      |     |      |
|----------------------|------|------|-----|------|
| 1952 10 8 6 6 EASY   | 17.1 | 51.0 | 60  | 0    |
| 1952 10 8 12 6 EASY  | 17.5 | 51.0 | 65  | 0    |
| 1952 10 8 18 6 EASY  | 18.1 | 50.9 | 80  | 968  |
| 1952 10 9 0 6 EASY   | 18.7 | 50.5 | 95  | 0    |
| 1952 10 9 6 6 EASY   | 18.7 | 50.2 | 80  | 0    |
| 1952 10 9 12 6 EASY  | 18.7 | 49.8 | 60  | 0    |
| 1952 10 9 18 6 EASY  | 18.0 | 49.2 | 40  | 1001 |
| 1952 10 10 0 6 EASY  | 17.2 | 49.2 | 40  | 0    |
| 1952 10 10 6 6 EASY  | 16.4 | 49.4 | 40  | 0    |
| 1952 10 10 12 6 EASY | 15.6 | 49.9 | 35  | 0    |
| 1952 10 10 18 6 EASY | 15.1 | 50.3 | 35  | 0    |
| 1952 10 11 0 6 EASY  | 14.7 | 51.0 | 35  | 0    |
| 1952 10 11 6 6 EASY  | 14.1 | 51.9 | 35  | 0    |
| 1952 10 11 12 6 EASY | 14.0 | 53.0 | 35  | 0    |
| 1952 10 20 12 7 FOX  | 11.8 | 77.6 | 25  | 0    |
| 1952 10 20 18 7 FOX  | 12.5 | 78.3 | 30  | 0    |
| 1952 10 21 0 7 FOX   | 13.3 | 79.1 | 30  | 0    |
| 1952 10 21 6 7 FOX   | 14.2 | 79.9 | 30  | 0    |
| 1952 10 21 12 7 FOX  | 15.0 | 80.7 | 45  | 0    |
| 1952 10 21 18 7 FOX  | 15.4 | 81.2 | 50  | 1003 |
| 1952 10 22 0 7 FOX   | 15.7 | 81.5 | 55  | 0    |
| 1952 10 22 6 7 FOX   | 16.3 | 81.9 | 60  | 0    |
| 1952 10 22 12 7 FOX  | 16.8 | 82.2 | 65  | 0    |
| 1952 10 22 18 7 FOX  | 17.3 | 82.3 | 75  | 993  |
| 1952 10 23 0 7 FOX   | 17.7 | 82.3 | 80  | 0    |
| 1952 10 23 6 7 FOX   | 18.0 | 82.3 | 85  | 0    |
| 1952 10 23 12 7 FOX  | 18.4 | 82.2 | 95  | 0    |
| 1952 10 23 18 7 FOX  | 18.9 | 82.1 | 100 | 0    |
| 1952 10 24 0 7 FOX   | 19.5 | 82.0 | 110 | 0    |
| 1952 10 24 6 7 FOX   | 20.1 | 81.8 | 120 | 0    |
| 1952 10 24 12 7 FOX  | 20.8 | 81.5 | 125 | 0    |
| 1952 10 24 18 7 FOX  | 21.8 | 81.0 | 130 | 934  |
| 1952 10 25 0 7 FOX   | 22.8 | 80.5 | 100 | 0    |
| 1952 10 25 6 7 FOX   | 23.5 | 80.1 | 85  | 0    |
| 1952 10 25 12 7 FOX  | 24.1 | 79.6 | 85  | 0    |
| 1952 10 25 18 7 FOX  | 24.6 | 78.8 | 90  | 991  |
| 1952 10 26 0 7 FOX   | 24.8 | 77.8 | 95  | 0    |
| 1952 10 26 6 7 FOX   | 24.7 | 76.8 | 95  | 0    |
| 1952 10 26 12 7 FOX  | 24.6 | 75.9 | 100 | 0    |
| 1952 10 26 18 7 FOX  | 24.4 | 75.1 | 95  | 0    |
| 1952 10 27 0 7 FOX   | 24.4 | 74.5 | 80  | 0    |
| 1952 10 27 6 7 FOX   | 25.3 | 74.0 | 65  | 0    |
| 1952 10 27 12 7 FOX  | 26.3 | 74.4 | 40  | 0    |
| 1952 10 27 18 7 FOX  | 27.3 | 73.5 | 35  | 0    |

|      |    |    |    |   |       |      |      |    |   |
|------|----|----|----|---|-------|------|------|----|---|
| 1952 | 10 | 28 | 0  | 7 | FOX   | 28.2 | 72.1 | 30 | 0 |
| 1952 | 10 | 28 | 6  | 7 | FOX   | 29.6 | 69.6 | 30 | 0 |
| 1952 | 10 | 28 | 12 | 7 | FOX   | 31.7 | 69.0 | 25 | 0 |
| 1953 | 5  | 25 | 18 | 1 | ALICE | 14.4 | 81.8 | 35 | 0 |
| 1953 | 5  | 26 | 0  | 1 | ALICE | 15.0 | 82.0 | 35 | 0 |
| 1953 | 5  | 26 | 6  | 1 | ALICE | 15.6 | 82.3 | 35 | 0 |
| 1953 | 5  | 26 | 12 | 1 | ALICE | 16.2 | 83.1 | 35 | 0 |
| 1953 | 5  | 26 | 18 | 1 | ALICE | 16.1 | 84.2 | 35 | 0 |
| 1953 | 5  | 27 | 0  | 1 | ALICE | 15.5 | 85.0 | 35 | 0 |
| 1953 | 5  | 27 | 6  | 1 | ALICE | 14.8 | 84.9 | 35 | 0 |
| 1953 | 5  | 27 | 12 | 1 | ALICE | 14.3 | 84.8 | 35 | 0 |
| 1953 | 5  | 27 | 18 | 1 | ALICE | 13.8 | 84.6 | 35 | 0 |
| 1953 | 5  | 28 | 0  | 1 | ALICE | 13.3 | 84.2 | 35 | 0 |
| 1953 | 5  | 28 | 6  | 1 | ALICE | 13.1 | 83.9 | 35 | 0 |
| 1953 | 5  | 28 | 12 | 1 | ALICE | 13.1 | 83.5 | 40 | 0 |
| 1953 | 5  | 28 | 18 | 1 | ALICE | 13.7 | 82.4 | 40 | 0 |
| 1953 | 5  | 29 | 0  | 1 | ALICE | 14.7 | 82.0 | 40 | 0 |
| 1953 | 5  | 29 | 6  | 1 | ALICE | 15.9 | 81.8 | 40 | 0 |
| 1953 | 5  | 29 | 12 | 1 | ALICE | 17.3 | 81.9 | 40 | 0 |
| 1953 | 5  | 29 | 18 | 1 | ALICE | 18.4 | 82.1 | 45 | 0 |
| 1953 | 5  | 30 | 0  | 1 | ALICE | 19.4 | 82.3 | 45 | 0 |
| 1953 | 5  | 30 | 6  | 1 | ALICE | 20.3 | 82.7 | 45 | 0 |
| 1953 | 5  | 30 | 12 | 1 | ALICE | 20.9 | 83.0 | 45 | 0 |
| 1953 | 5  | 30 | 18 | 1 | ALICE | 21.2 | 83.2 | 45 | 0 |
| 1953 | 5  | 31 | 0  | 1 | ALICE | 21.4 | 83.3 | 45 | 0 |
| 1953 | 5  | 31 | 6  | 1 | ALICE | 21.7 | 83.4 | 45 | 0 |
| 1953 | 5  | 31 | 12 | 1 | ALICE | 22.0 | 83.6 | 45 | 0 |
| 1953 | 5  | 31 | 18 | 1 | ALICE | 22.3 | 83.8 | 50 | 0 |
| 1953 | 6  | 1  | 0  | 1 | ALICE | 22.6 | 83.9 | 50 | 0 |
| 1953 | 6  | 1  | 6  | 1 | ALICE | 23.3 | 84.2 | 55 | 0 |
| 1953 | 6  | 1  | 12 | 1 | ALICE | 24.0 | 84.7 | 55 | 0 |
| 1953 | 6  | 1  | 18 | 1 | ALICE | 24.6 | 85.6 | 55 | 0 |
| 1953 | 6  | 2  | 0  | 1 | ALICE | 24.0 | 86.2 | 50 | 0 |
| 1953 | 6  | 2  | 6  | 1 | ALICE | 23.3 | 85.7 | 50 | 0 |
| 1953 | 6  | 2  | 12 | 1 | ALICE | 23.0 | 84.7 | 45 | 0 |
| 1953 | 6  | 2  | 18 | 1 | ALICE | 23.0 | 84.1 | 40 | 0 |
| 1953 | 6  | 3  | 0  | 1 | ALICE | 23.1 | 83.6 | 40 | 0 |
| 1953 | 6  | 3  | 6  | 1 | ALICE | 23.2 | 83.3 | 35 | 0 |
| 1953 | 6  | 3  | 12 | 1 | ALICE | 23.4 | 83.0 | 35 | 0 |
| 1953 | 6  | 3  | 18 | 1 | ALICE | 23.7 | 82.6 | 35 | 0 |
| 1953 | 6  | 4  | 0  | 1 | ALICE | 24.0 | 82.6 | 35 | 0 |
| 1953 | 6  | 4  | 6  | 1 | ALICE | 24.2 | 83.2 | 40 | 0 |
| 1953 | 6  | 4  | 12 | 1 | ALICE | 24.5 | 83.7 | 50 | 0 |
| 1953 | 6  | 4  | 18 | 1 | ALICE | 25.2 | 84.3 | 55 | 0 |

|      |   |    |    |   |           |      |      |    |     |
|------|---|----|----|---|-----------|------|------|----|-----|
| 1953 | 6 | 5  | 0  | 1 | ALICE     | 25.9 | 84.8 | 60 | 0   |
| 1953 | 6 | 5  | 6  | 1 | ALICE     | 26.6 | 85.2 | 60 | 0   |
| 1953 | 6 | 5  | 12 | 1 | ALICE     | 27.3 | 85.5 | 60 | 0   |
| 1953 | 6 | 5  | 18 | 1 | ALICE     | 28.0 | 85.7 | 60 | 0   |
| 1953 | 6 | 6  | 0  | 1 | ALICE     | 28.6 | 85.8 | 60 | 997 |
| 1953 | 6 | 6  | 6  | 1 | ALICE     | 29.1 | 85.8 | 40 | 0   |
| 1953 | 6 | 6  | 12 | 1 | ALICE     | 29.6 | 85.8 | 40 | 0   |
| 1953 | 6 | 6  | 18 | 1 | ALICE     | 30.2 | 85.8 | 35 | 0   |
| 1953 | 8 | 11 | 6  | 2 | BARBARA   | 22.8 | 73.9 | 35 | 0   |
| 1953 | 8 | 11 | 12 | 2 | BARBARA   | 24.1 | 74.5 | 45 | 0   |
| 1953 | 8 | 11 | 18 | 2 | BARBARA   | 25.3 | 74.8 | 50 | 0   |
| 1953 | 8 | 12 | 0  | 2 | BARBARA   | 26.5 | 75.2 | 55 | 0   |
| 1953 | 8 | 12 | 6  | 2 | BARBARA   | 27.9 | 75.6 | 60 | 0   |
| 1953 | 8 | 12 | 12 | 2 | BARBARA   | 29.2 | 75.9 | 65 | 0   |
| 1953 | 8 | 12 | 18 | 2 | BARBARA   | 29.9 | 76.0 | 70 | 0   |
| 1953 | 8 | 13 | 0  | 2 | BARBARA   | 30.5 | 76.1 | 80 | 0   |
| 1953 | 8 | 13 | 6  | 2 | BARBARA   | 31.5 | 76.2 | 85 | 0   |
| 1953 | 8 | 13 | 12 | 2 | BARBARA   | 32.5 | 76.3 | 90 | 0   |
| 1953 | 8 | 13 | 18 | 2 | BARBARA   | 33.6 | 76.3 | 95 | 0   |
| 1953 | 8 | 14 | 0  | 2 | BARBARA   | 34.7 | 76.1 | 90 | 987 |
| 1953 | 8 | 14 | 6  | 2 | BARBARA   | 35.8 | 75.7 | 70 | 0   |
| 1953 | 8 | 14 | 12 | 2 | BARBARA   | 37.0 | 75.0 | 65 | 0   |
| 1953 | 8 | 14 | 18 | 2 | BARBARA   | 38.1 | 73.8 | 70 | 0   |
| 1953 | 8 | 15 | 0  | 2 | BARBARA   | 39.3 | 72.3 | 75 | 0   |
| 1953 | 8 | 15 | 6  | 2 | BARBARA   | 40.4 | 70.4 | 75 | 0   |
| 1953 | 8 | 15 | 12 | 2 | BARBARA   | 41.5 | 68.0 | 75 | 0   |
| 1953 | 8 | 15 | 18 | 2 | BARBARA   | 43.1 | 64.3 | 70 | 0   |
| 1953 | 8 | 16 | 0  | 2 | BARBARA   | 45.3 | 60.5 | 55 | 0   |
| 1953 | 8 | 16 | 6  | 2 | BARBARA   | 48.7 | 59.1 | 50 | 0   |
| 1953 | 8 | 16 | 12 | 2 | BARBARA   | 53.5 | 59.4 | 45 | 0   |
| 1953 | 8 | 28 | 18 | 3 | NOT NAMED | 21.7 | 82.6 | 35 | 0   |
| 1953 | 8 | 29 | 0  | 3 | NOT NAMED | 23.8 | 84.2 | 40 | 0   |
| 1953 | 8 | 29 | 6  | 3 | NOT NAMED | 24.9 | 84.1 | 40 | 0   |
| 1953 | 8 | 29 | 12 | 3 | NOT NAMED | 26.0 | 82.6 | 45 | 985 |
| 1953 | 8 | 29 | 18 | 3 | NOT NAMED | 26.0 | 81.2 | 35 | 0   |
| 1953 | 8 | 30 | 0  | 3 | NOT NAMED | 26.1 | 79.8 | 35 | 0   |
| 1953 | 8 | 30 | 6  | 3 | NOT NAMED | 26.8 | 78.4 | 35 | 0   |
| 1953 | 8 | 30 | 12 | 3 | NOT NAMED | 27.4 | 77.5 | 35 | 0   |
| 1953 | 8 | 30 | 18 | 3 | NOT NAMED | 28.0 | 77.5 | 40 | 0   |
| 1953 | 8 | 31 | 0  | 3 | NOT NAMED | 28.7 | 77.8 | 40 | 0   |
| 1953 | 8 | 31 | 6  | 3 | NOT NAMED | 29.2 | 78.1 | 45 | 0   |
| 1953 | 8 | 31 | 12 | 3 | NOT NAMED | 29.7 | 78.4 | 50 | 0   |
| 1953 | 8 | 31 | 18 | 3 | NOT NAMED | 30.4 | 78.9 | 50 | 0   |
| 1953 | 9 | 1  | 0  | 3 | NOT NAMED | 31.2 | 79.7 | 40 | 0   |

|      |   |    |    |             |      |      |     |     |
|------|---|----|----|-------------|------|------|-----|-----|
| 1953 | 9 | 1  | 6  | 3 NOT NAMED | 31.9 | 80.8 | 30  | 0   |
| 1953 | 9 | 1  | 12 | 3 NOT NAMED | 32.4 | 82.0 | 25  | 0   |
| 1953 | 9 | 1  | 18 | 3 NOT NAMED | 32.5 | 83.0 | 25  | 0   |
| 1953 | 9 | 2  | 0  | 3 NOT NAMED | 32.5 | 83.8 | 25  | 0   |
| 1953 | 9 | 2  | 6  | 3 NOT NAMED | 32.7 | 84.3 | 25  | 0   |
| 1953 | 9 | 2  | 12 | 3 NOT NAMED | 33.2 | 84.8 | 25  | 0   |
| 1953 | 9 | 2  | 18 | 3 NOT NAMED | 34.4 | 85.4 | 25  | 0   |
| 1953 | 9 | 3  | 0  | 3 NOT NAMED | 36.5 | 86.0 | 25  | 0   |
| 1953 | 9 | 3  | 6  | 3 NOT NAMED | 38.5 | 85.2 | 20  | 0   |
| 1953 | 8 | 28 | 6  | 4 CAROL     | 16.0 | 20.5 | 25  | 0   |
| 1953 | 8 | 28 | 12 | 4 CAROL     | 15.3 | 21.6 | 30  | 0   |
| 1953 | 8 | 28 | 18 | 4 CAROL     | 14.6 | 22.8 | 30  | 0   |
| 1953 | 8 | 29 | 0  | 4 CAROL     | 13.9 | 24.0 | 30  | 0   |
| 1953 | 8 | 29 | 6  | 4 CAROL     | 13.2 | 25.3 | 30  | 0   |
| 1953 | 8 | 29 | 12 | 4 CAROL     | 12.6 | 26.7 | 30  | 0   |
| 1953 | 8 | 29 | 18 | 4 CAROL     | 12.0 | 28.1 | 30  | 0   |
| 1953 | 8 | 30 | 0  | 4 CAROL     | 11.4 | 29.5 | 30  | 0   |
| 1953 | 8 | 30 | 6  | 4 CAROL     | 10.9 | 30.7 | 30  | 0   |
| 1953 | 8 | 30 | 12 | 4 CAROL     | 10.7 | 32.1 | 30  | 0   |
| 1953 | 8 | 30 | 18 | 4 CAROL     | 10.6 | 33.9 | 30  | 0   |
| 1953 | 8 | 31 | 0  | 4 CAROL     | 10.6 | 35.8 | 30  | 0   |
| 1953 | 8 | 31 | 6  | 4 CAROL     | 10.6 | 37.7 | 35  | 0   |
| 1953 | 8 | 31 | 12 | 4 CAROL     | 10.6 | 39.6 | 35  | 0   |
| 1953 | 8 | 31 | 18 | 4 CAROL     | 10.8 | 41.4 | 40  | 0   |
| 1953 | 9 | 1  | 0  | 4 CAROL     | 11.3 | 43.0 | 40  | 0   |
| 1953 | 9 | 1  | 6  | 4 CAROL     | 11.9 | 44.3 | 45  | 0   |
| 1953 | 9 | 1  | 12 | 4 CAROL     | 12.5 | 45.6 | 50  | 0   |
| 1953 | 9 | 1  | 18 | 4 CAROL     | 13.1 | 46.9 | 55  | 0   |
| 1953 | 9 | 2  | 0  | 4 CAROL     | 13.6 | 48.1 | 60  | 0   |
| 1953 | 9 | 2  | 6  | 4 CAROL     | 14.2 | 49.5 | 70  | 0   |
| 1953 | 9 | 2  | 12 | 4 CAROL     | 15.0 | 51.0 | 75  | 0   |
| 1953 | 9 | 2  | 18 | 4 CAROL     | 16.1 | 53.7 | 85  | 0   |
| 1953 | 9 | 3  | 0  | 4 CAROL     | 17.3 | 56.3 | 115 | 0   |
| 1953 | 9 | 3  | 6  | 4 CAROL     | 18.1 | 57.5 | 125 | 0   |
| 1953 | 9 | 3  | 12 | 4 CAROL     | 18.9 | 58.7 | 130 | 0   |
| 1953 | 9 | 3  | 18 | 4 CAROL     | 19.9 | 60.0 | 130 | 929 |
| 1953 | 9 | 4  | 0  | 4 CAROL     | 21.0 | 61.3 | 130 | 0   |
| 1953 | 9 | 4  | 6  | 4 CAROL     | 22.3 | 62.5 | 130 | 0   |
| 1953 | 9 | 4  | 12 | 4 CAROL     | 23.7 | 63.5 | 130 | 0   |
| 1953 | 9 | 4  | 18 | 4 CAROL     | 25.0 | 64.3 | 125 | 0   |
| 1953 | 9 | 5  | 0  | 4 CAROL     | 26.3 | 65.1 | 120 | 0   |
| 1953 | 9 | 5  | 6  | 4 CAROL     | 27.8 | 66.1 | 115 | 0   |
| 1953 | 9 | 5  | 12 | 4 CAROL     | 29.2 | 67.1 | 105 | 0   |
| 1953 | 9 | 5  | 18 | 4 CAROL     | 29.9 | 67.6 | 100 | 0   |

|      |   |    |    |   |       |      |      |     |     |
|------|---|----|----|---|-------|------|------|-----|-----|
| 1953 | 9 | 6  | 0  | 4 | CAROL | 30.5 | 68.0 | 95  | 0   |
| 1953 | 9 | 6  | 6  | 4 | CAROL | 31.6 | 68.8 | 90  | 0   |
| 1953 | 9 | 6  | 12 | 4 | CAROL | 33.0 | 69.6 | 85  | 0   |
| 1953 | 9 | 6  | 18 | 4 | CAROL | 35.0 | 70.6 | 80  | 0   |
| 1953 | 9 | 7  | 0  | 4 | CAROL | 37.2 | 70.8 | 80  | 0   |
| 1953 | 9 | 7  | 6  | 4 | CAROL | 38.6 | 70.3 | 75  | 0   |
| 1953 | 9 | 7  | 12 | 4 | CAROL | 40.3 | 69.3 | 70  | 0   |
| 1953 | 9 | 7  | 18 | 4 | CAROL | 43.3 | 67.3 | 65  | 0   |
| 1953 | 9 | 8  | 0  | 4 | CAROL | 46.4 | 65.2 | 60  | 0   |
| 1953 | 9 | 8  | 6  | 4 | CAROL | 49.1 | 63.0 | 55  | 0   |
| 1953 | 9 | 8  | 12 | 4 | CAROL | 51.8 | 60.8 | 50  | 0   |
| 1953 | 9 | 8  | 18 | 4 | CAROL | 54.5 | 58.4 | 50  | 0   |
| 1953 | 9 | 9  | 0  | 4 | CAROL | 57.0 | 56.2 | 45  | 0   |
| 1953 | 9 | 9  | 6  | 4 | CAROL | 59.5 | 54.1 | 45  | 0   |
| 1953 | 9 | 9  | 12 | 4 | CAROL | 61.8 | 52.0 | 45  | 0   |
| 1953 | 9 | 8  | 6  | 5 | DOLLY | 20.3 | 65.9 | 40  | 0   |
| 1953 | 9 | 8  | 12 | 5 | DOLLY | 20.0 | 66.7 | 50  | 0   |
| 1953 | 9 | 8  | 18 | 5 | DOLLY | 19.4 | 67.5 | 50  | 0   |
| 1953 | 9 | 9  | 0  | 5 | DOLLY | 19.5 | 68.2 | 55  | 0   |
| 1953 | 9 | 9  | 6  | 5 | DOLLY | 20.1 | 68.9 | 60  | 0   |
| 1953 | 9 | 9  | 12 | 5 | DOLLY | 20.7 | 69.4 | 65  | 0   |
| 1953 | 9 | 9  | 18 | 5 | DOLLY | 21.3 | 69.8 | 85  | 0   |
| 1953 | 9 | 10 | 0  | 5 | DOLLY | 22.0 | 70.1 | 95  | 0   |
| 1953 | 9 | 10 | 6  | 5 | DOLLY | 22.8 | 70.3 | 100 | 0   |
| 1953 | 9 | 10 | 12 | 5 | DOLLY | 23.7 | 70.5 | 100 | 995 |
| 1953 | 9 | 10 | 18 | 5 | DOLLY | 24.9 | 70.6 | 100 | 0   |
| 1953 | 9 | 11 | 0  | 5 | DOLLY | 26.1 | 70.5 | 95  | 0   |
| 1953 | 9 | 11 | 6  | 5 | DOLLY | 27.6 | 70.0 | 90  | 0   |
| 1953 | 9 | 11 | 12 | 5 | DOLLY | 29.0 | 69.0 | 85  | 0   |
| 1953 | 9 | 11 | 18 | 5 | DOLLY | 30.4 | 67.6 | 75  | 0   |
| 1953 | 9 | 12 | 0  | 5 | DOLLY | 31.8 | 65.9 | 60  | 0   |
| 1953 | 9 | 12 | 6  | 5 | DOLLY | 33.3 | 64.0 | 60  | 0   |
| 1953 | 9 | 12 | 12 | 5 | DOLLY | 34.9 | 61.8 | 55  | 0   |
| 1953 | 9 | 12 | 18 | 5 | DOLLY | 36.8 | 58.9 | 55  | 0   |
| 1953 | 9 | 13 | 0  | 5 | DOLLY | 38.8 | 55.6 | 50  | 0   |
| 1953 | 9 | 13 | 6  | 5 | DOLLY | 40.4 | 51.6 | 50  | 0   |
| 1953 | 9 | 13 | 12 | 5 | DOLLY | 41.7 | 48.0 | 50  | 0   |
| 1953 | 9 | 13 | 18 | 5 | DOLLY | 42.5 | 45.7 | 50  | 0   |
| 1953 | 9 | 14 | 0  | 5 | DOLLY | 42.9 | 43.7 | 45  | 0   |
| 1953 | 9 | 14 | 6  | 5 | DOLLY | 43.0 | 41.8 | 45  | 0   |
| 1953 | 9 | 14 | 12 | 5 | DOLLY | 43.0 | 40.0 | 45  | 0   |
| 1953 | 9 | 14 | 18 | 5 | DOLLY | 43.0 | 38.6 | 45  | 0   |
| 1953 | 9 | 15 | 0  | 5 | DOLLY | 43.0 | 37.3 | 45  | 0   |
| 1953 | 9 | 15 | 6  | 5 | DOLLY | 43.0 | 36.2 | 45  | 0   |



|      |         |             |      |      |     |   |
|------|---------|-------------|------|------|-----|---|
| 1953 | 9 15 12 | 5 DOLLY     | 42.9 | 35.0 | 45  | 0 |
| 1953 | 9 15 18 | 5 DOLLY     | 42.6 | 31.9 | 40  | 0 |
| 1953 | 9 16 0  | 5 DOLLY     | 42.3 | 28.3 | 40  | 0 |
| 1953 | 9 16 6  | 5 DOLLY     | 42.1 | 26.1 | 40  | 0 |
| 1953 | 9 16 12 | 5 DOLLY     | 42.0 | 23.8 | 35  | 0 |
| 1953 | 9 16 18 | 5 DOLLY     | 41.9 | 21.2 | 30  | 0 |
| 1953 | 9 17 0  | 5 DOLLY     | 41.8 | 18.6 | 30  | 0 |
| 1953 | 9 17 6  | 5 DOLLY     | 41.8 | 15.9 | 30  | 0 |
| 1953 | 9 17 12 | 5 DOLLY     | 41.8 | 13.2 | 25  | 0 |
| 1953 | 9 17 18 | 5 DOLLY     | 42.0 | 10.5 | 25  | 0 |
| 1953 | 9 14 6  | 6 EDNA      | 16.0 | 61.7 | 25  | 0 |
| 1953 | 9 14 12 | 6 EDNA      | 17.0 | 62.4 | 35  | 0 |
| 1953 | 9 14 18 | 6 EDNA      | 17.9 | 63.1 | 40  | 0 |
| 1953 | 9 15 0  | 6 EDNA      | 18.9 | 64.2 | 45  | 0 |
| 1953 | 9 15 6  | 6 EDNA      | 19.9 | 65.6 | 55  | 0 |
| 1953 | 9 15 12 | 6 EDNA      | 20.9 | 67.0 | 65  | 0 |
| 1953 | 9 15 18 | 6 EDNA      | 21.9 | 68.3 | 75  | 0 |
| 1953 | 9 16 0  | 6 EDNA      | 22.9 | 69.5 | 90  | 0 |
| 1953 | 9 16 6  | 6 EDNA      | 23.9 | 70.5 | 105 | 0 |
| 1953 | 9 16 12 | 6 EDNA      | 24.8 | 71.1 | 110 | 0 |
| 1953 | 9 16 18 | 6 EDNA      | 26.3 | 71.2 | 110 | 0 |
| 1953 | 9 17 0  | 6 EDNA      | 28.0 | 70.8 | 110 | 0 |
| 1953 | 9 17 6  | 6 EDNA      | 28.8 | 70.4 | 110 | 0 |
| 1953 | 9 17 12 | 6 EDNA      | 29.5 | 69.7 | 105 | 0 |
| 1953 | 9 17 18 | 6 EDNA      | 30.8 | 68.3 | 105 | 0 |
| 1953 | 9 18 0  | 6 EDNA      | 32.6 | 66.2 | 100 | 0 |
| 1953 | 9 18 6  | 6 EDNA      | 34.8 | 63.6 | 95  | 0 |
| 1953 | 9 18 12 | 6 EDNA      | 37.0 | 60.2 | 85  | 0 |
| 1953 | 9 18 18 | 6 EDNA      | 39.2 | 56.1 | 70  | 0 |
| 1953 | 9 19 0  | 6 EDNA      | 41.4 | 51.1 | 55  | 0 |
| 1953 | 9 19 6  | 6 EDNA      | 43.0 | 46.0 | 40  | 0 |
| 1953 | 9 19 12 | 6 EDNA      | 44.3 | 41.0 | 35  | 0 |
| 1953 | 9 19 18 | 6 EDNA      | 46.2 | 36.0 | 35  | 0 |
| 1953 | 9 20 0  | 6 EDNA      | 48.1 | 30.9 | 30  | 0 |
| 1953 | 9 20 6  | 6 EDNA      | 49.7 | 26.0 | 30  | 0 |
| 1953 | 9 20 12 | 6 EDNA      | 51.3 | 21.3 | 30  | 0 |
| 1953 | 9 20 18 | 6 EDNA      | 52.4 | 16.7 | 30  | 0 |
| 1953 | 9 14 6  | 7 NOT NAMED | 23.1 | 95.0 | 30  | 0 |
| 1953 | 9 14 12 | 7 NOT NAMED | 23.1 | 94.2 | 40  | 0 |
| 1953 | 9 14 18 | 7 NOT NAMED | 22.9 | 93.5 | 50  | 0 |
| 1953 | 9 15 0  | 7 NOT NAMED | 22.8 | 92.8 | 55  | 0 |
| 1953 | 9 15 6  | 7 NOT NAMED | 22.8 | 92.1 | 60  | 0 |
| 1953 | 9 15 12 | 7 NOT NAMED | 23.0 | 91.3 | 60  | 0 |
| 1953 | 9 15 18 | 7 NOT NAMED | 23.4 | 90.4 | 60  | 0 |

|      |        |        |             |      |      |     |     |
|------|--------|--------|-------------|------|------|-----|-----|
| 1953 | 9 16   | 0      | 7 NOT NAMED | 24.0 | 89.5 | 60  | 0   |
| 1953 | 9 16   | 6      | 7 NOT NAMED | 24.9 | 88.6 | 60  | 0   |
| 1953 | 9 16   | 12     | 7 NOT NAMED | 25.9 | 87.8 | 60  | 0   |
| 1953 | 9 16   | 18     | 7 NOT NAMED | 26.5 | 87.1 | 60  | 0   |
| 1953 | 9 17   | 0      | 7 NOT NAMED | 26.6 | 86.4 | 60  | 0   |
| 1953 | 9 17   | 6      | 7 NOT NAMED | 26.3 | 85.7 | 60  | 0   |
| 1953 | 9 17   | 12     | 7 NOT NAMED | 25.9 | 85.5 | 60  | 0   |
| 1953 | 9 17   | 18     | 7 NOT NAMED | 25.5 | 86.1 | 60  | 0   |
| 1953 | 9 18   | 0      | 7 NOT NAMED | 25.3 | 86.9 | 60  | 0   |
| 1953 | 9 18   | 6      | 7 NOT NAMED | 25.3 | 87.7 | 60  | 0   |
| 1953 | 9 18   | 12     | 7 NOT NAMED | 25.8 | 88.5 | 60  | 0   |
| 1953 | 9 18   | 18     | 7 NOT NAMED | 26.5 | 88.7 | 60  | 0   |
| 1953 | 9 19   | 0      | 7 NOT NAMED | 27.3 | 88.6 | 60  | 0   |
| 1953 | 9 19   | 6      | 7 NOT NAMED | 27.9 | 88.4 | 60  | 0   |
| 1953 | 9 19   | 12     | 7 NOT NAMED | 28.5 | 88.0 | 60  | 0   |
| 1953 | 9 19   | 18     | 7 NOT NAMED | 28.9 | 87.1 | 60  | 0   |
| 1953 | 9 20   | 0      | 7 NOT NAMED | 29.2 | 86.2 | 60  | 0   |
| 1953 | 9 20   | 6      | 7 NOT NAMED | 29.4 | 85.5 | 55  | 0   |
| 1953 | 9 20   | 12     | 7 NOT NAMED | 29.6 | 84.7 | 50  | 0   |
| 1953 | 9 20   | 18     | 7 NOT NAMED | 30.0 | 83.0 | 40  | 0   |
| 1953 | 9 21   | 0      | 7 NOT NAMED | 32.0 | 80.2 | 25  | 0   |
| 1953 | 9 23   | 12     | 8 FLORENCE  | 16.9 | 75.8 | 35  | 0   |
| 1953 | 9 23   | 18     | 8 FLORENCE  | 16.8 | 78.1 | 40  | 0   |
| 1953 | 9 24   | 0      | 8 FLORENCE  | 17.2 | 80.2 | 45  | 0   |
| 1953 | 9 24   | 6      | 8 FLORENCE  | 18.2 | 82.2 | 50  | 0   |
| 1953 | 9 24   | 12     | 8 FLORENCE  | 19.4 | 83.9 | 60  | 0   |
| 1953 | 9 24   | 18     | 8 FLORENCE  | 20.9 | 85.0 | 70  | 0   |
| 1953 | 9 25   | 0      | 8 FLORENCE  | 22.4 | 86.4 | 90  | 0   |
| 1953 | 9 25   | 6      | 8 FLORENCE  | 23.4 | 87.0 | 110 | 0   |
| 1953 | 9 25   | 12     | 8 FLORENCE  | 24.4 | 87.3 | 110 | 968 |
| 1953 | 9 25   | 18     | 8 FLORENCE  | 25.9 | 87.5 | 110 | 0   |
| 1953 | 9 26   | 0      | 8 FLORENCE  | 27.5 | 87.4 | 105 | 0   |
| 1953 | 9 26   | 6      | 8 FLORENCE  | 28.7 | 87.0 | 90  | 0   |
| 1953 | 9 26   | 12     | 8 FLORENCE  | 29.7 | 86.8 | 80  | 0   |
| 1953 | 9 26   | 18     | 8 FLORENCE  | 30.4 | 86.1 | 70  | 985 |
| 1953 | 9 27   | 0      | 8 FLORENCE  | 30.9 | 85.0 | 60  | 0   |
| 1953 | 9 27   | 6      | 8 FLORENCE  | 31.2 | 83.8 | 50  | 0   |
| 1953 | 9 27   | 12     | 8 FLORENCE  | 31.6 | 82.3 | 40  | 0   |
| 1953 | 9 27   | 18     | 8 FLORENCE  | 32.5 | 80.2 | 35  | 0   |
| 1953 | 9 28   | 0      | 8 FLORENCE  | 33.8 | 77.1 | 35  | 0   |
| 1953 | 9 28   | 6      | 8 FLORENCE  | 35.4 | 73.4 | 35  | 0   |
| 1953 | 9 28   | 12     | 8 FLORENCE  | 37.0 | 69.7 | 35  | 0   |
| 1953 | 9 28   | 18     | 8 FLORENCE  | 39.3 | 65.7 | 35  | 0   |
| 1953 | 10 2 6 | 9 GAIL | 13.1        | 35.5 | 30   | 0   |     |

|         |          |           |      |      |    |   |
|---------|----------|-----------|------|------|----|---|
| 1953 10 | 2 12     | 9 GAIL    | 13.5 | 37.0 | 45 | 0 |
| 1953 10 | 2 18     | 9 GAIL    | 13.8 | 38.5 | 50 | 0 |
| 1953 10 | 3 0      | 9 GAIL    | 14.1 | 40.0 | 55 | 0 |
| 1953 10 | 3 6      | 9 GAIL    | 14.6 | 41.4 | 60 | 0 |
| 1953 10 | 3 12     | 9 GAIL    | 14.8 | 42.8 | 65 | 0 |
| 1953 10 | 3 18     | 9 GAIL    | 14.6 | 44.2 | 70 | 0 |
| 1953 10 | 4 0      | 9 GAIL    | 14.3 | 45.3 | 65 | 0 |
| 1953 10 | 4 6      | 9 GAIL    | 14.1 | 45.8 | 50 | 0 |
| 1953 10 | 4 12     | 9 GAIL    | 13.8 | 46.1 | 45 | 0 |
| 1953 10 | 4 18     | 9 GAIL    | 13.3 | 46.7 | 40 | 0 |
| 1953 10 | 5 0      | 9 GAIL    | 12.8 | 47.2 | 35 | 0 |
| 1953 10 | 5 6      | 9 GAIL    | 12.4 | 47.6 | 35 | 0 |
| 1953 10 | 5 12     | 9 GAIL    | 12.1 | 48.0 | 30 | 0 |
| 1953 10 | 5 18     | 9 GAIL    | 11.7 | 48.3 | 25 | 0 |
| 1953 10 | 3 18 10  | NOT NAMED | 20.3 | 79.0 | 35 | 0 |
| 1953 10 | 4 0 10   | NOT NAMED | 21.5 | 80.0 | 35 | 0 |
| 1953 10 | 4 6 10   | NOT NAMED | 22.4 | 80.2 | 35 | 0 |
| 1953 10 | 4 12 10  | NOT NAMED | 23.3 | 80.3 | 35 | 0 |
| 1953 10 | 4 18 10  | NOT NAMED | 24.3 | 80.1 | 35 | 0 |
| 1953 10 | 5 0 10   | NOT NAMED | 25.3 | 79.7 | 35 | 0 |
| 1953 10 | 5 6 10   | NOT NAMED | 26.5 | 79.0 | 35 | 0 |
| 1953 10 | 5 12 10  | NOT NAMED | 27.8 | 78.1 | 40 | 0 |
| 1953 10 | 5 18 10  | NOT NAMED | 29.0 | 76.9 | 40 | 0 |
| 1953 10 | 6 0 10   | NOT NAMED | 30.2 | 75.4 | 40 | 0 |
| 1953 10 | 6 6 10   | NOT NAMED | 32.0 | 73.3 | 40 | 0 |
| 1953 10 | 6 12 10  | NOT NAMED | 34.0 | 71.2 | 45 | 0 |
| 1953 10 | 6 18 10  | NOT NAMED | 35.5 | 69.6 | 50 | 0 |
| 1953 10 | 7 0 10   | NOT NAMED | 37.7 | 68.0 | 55 | 0 |
| 1953 10 | 7 6 10   | NOT NAMED | 38.8 | 66.5 | 60 | 0 |
| 1953 10 | 7 12 10  | NOT NAMED | 40.5 | 65.0 | 60 | 0 |
| 1953 10 | 7 18 10  | NOT NAMED | 42.0 | 63.7 | 60 | 0 |
| 1953 10 | 8 0 10   | NOT NAMED | 43.5 | 62.5 | 60 | 0 |
| 1953 10 | 8 6 10   | NOT NAMED | 45.2 | 61.6 | 60 | 0 |
| 1953 10 | 8 12 10  | NOT NAMED | 47.0 | 60.2 | 60 | 0 |
| 1953 10 | 8 18 10  | NOT NAMED | 49.1 | 57.0 | 60 | 0 |
| 1953 10 | 9 0 10   | NOT NAMED | 51.0 | 53.1 | 55 | 0 |
| 1953 10 | 9 6 10   | NOT NAMED | 52.3 | 49.7 | 55 | 0 |
| 1953 10 | 9 12 10  | NOT NAMED | 53.4 | 46.2 | 50 | 0 |
| 1953 10 | 9 18 10  | NOT NAMED | 54.5 | 41.7 | 50 | 0 |
| 1953 10 | 10 0 10  | NOT NAMED | 55.4 | 37.2 | 50 | 0 |
| 1953 10 | 10 6 10  | NOT NAMED | 56.2 | 33.8 | 50 | 0 |
| 1953 10 | 10 12 10 | NOT NAMED | 57.0 | 30.3 | 50 | 0 |
| 1953 10 | 10 18 10 | NOT NAMED | 58.3 | 27.7 | 45 | 0 |
| 1953 10 | 5 6 11   | NOT NAMED | 18.7 | 40.2 | 50 | 0 |

|               |         |           |      |      |    |     |
|---------------|---------|-----------|------|------|----|-----|
| 1953 10       | 5 12 11 | NOT NAMED | 19.2 | 40.7 | 55 | 0   |
| 1953 10       | 5 18 11 | NOT NAMED | 19.6 | 41.2 | 60 | 0   |
| 1953 10       | 6 0 11  | NOT NAMED | 20.0 | 41.9 | 55 | 0   |
| 1953 10       | 6 6 11  | NOT NAMED | 20.5 | 42.9 | 50 | 0   |
| 1953 10       | 6 12 11 | NOT NAMED | 20.9 | 44.0 | 50 | 0   |
| 1953 10       | 6 18 11 | NOT NAMED | 21.2 | 44.8 | 45 | 0   |
| 1953 10       | 7 0 11  | NOT NAMED | 21.4 | 45.7 | 45 | 0   |
| 1953 10       | 7 6 11  | NOT NAMED | 21.7 | 47.0 | 45 | 0   |
| 1953 10       | 7 12 11 | NOT NAMED | 22.0 | 48.2 | 40 | 0   |
| 1953 10       | 7 18 11 | NOT NAMED | 22.2 | 49.5 | 40 | 0   |
| 1953 10       | 8 0 11  | NOT NAMED | 22.3 | 50.7 | 35 | 0   |
| 1953 10       | 8 6 11  | NOT NAMED | 22.6 | 52.1 | 35 | 0   |
| 1953 10       | 8 12 11 | NOT NAMED | 22.8 | 53.8 | 35 | 0   |
| 1953 10       | 8 18 11 | NOT NAMED | 23.0 | 55.6 | 30 | 0   |
| 1953 10       | 9 0 11  | NOT NAMED | 23.0 | 57.4 | 25 | 0   |
| 1953 10       | 7 6 12  | HAZEL     | 20.5 | 86.4 | 35 | 0   |
| 1953 10       | 7 12 12 | HAZEL     | 21.0 | 86.3 | 35 | 0   |
| 1953 10       | 7 18 12 | HAZEL     | 21.3 | 86.2 | 35 | 0   |
| 1953 10       | 8 0 12  | HAZEL     | 21.7 | 86.1 | 40 | 0   |
| 1953 10       | 8 6 12  | HAZEL     | 22.2 | 86.1 | 40 | 0   |
| 1953 10       | 8 12 12 | HAZEL     | 22.7 | 86.0 | 45 | 0   |
| 1953 10       | 8 18 12 | HAZEL     | 23.3 | 85.8 | 55 | 0   |
| 1953 10       | 9 0 12  | HAZEL     | 24.0 | 85.3 | 55 | 0   |
| 1953 10       | 9 6 12  | HAZEL     | 25.0 | 84.4 | 60 | 0   |
| 1953 10       | 9 12 12 | HAZEL     | 26.2 | 83.0 | 60 | 0   |
| 1953 10       | 9 18 12 | HAZEL     | 27.4 | 81.2 | 55 | 994 |
| 1953 10 10    | 0 12    | HAZEL     | 28.8 | 79.0 | 55 | 0   |
| 1953 10 10    | 6 12    | HAZEL     | 30.7 | 76.2 | 60 | 0   |
| 1953 10 10 12 | 12 12   | HAZEL     | 32.4 | 73.6 | 60 | 0   |
| 1953 10 10 18 | 18 12   | HAZEL     | 33.5 | 71.5 | 60 | 0   |
| 1953 10 11    | 0 12    | HAZEL     | 34.5 | 69.4 | 55 | 0   |
| 1953 10 11    | 6 12    | HAZEL     | 35.4 | 67.3 | 50 | 0   |
| 1953 10 11 12 | 12 12   | HAZEL     | 36.4 | 65.1 | 45 | 0   |
| 1953 10 11 18 | 18 12   | HAZEL     | 37.8 | 62.2 | 45 | 0   |
| 1953 10 12    | 0 12    | HAZEL     | 39.4 | 59.0 | 40 | 0   |
| 1953 10 12    | 6 12    | HAZEL     | 41.0 | 56.1 | 40 | 0   |
| 1953 10 12 12 | 12 12   | HAZEL     | 42.7 | 53.2 | 35 | 0   |
| 1953 10 12 18 | 18 12   | HAZEL     | 44.7 | 51.0 | 35 | 0   |
| 1953 11 23    | 6 13    | NOT NAMED | 22.0 | 56.5 | 35 | 0   |
| 1953 11 23 12 | 13      | NOT NAMED | 22.8 | 56.3 | 35 | 0   |
| 1953 11 23 18 | 13      | NOT NAMED | 23.8 | 55.7 | 35 | 0   |
| 1953 11 24    | 0 13    | NOT NAMED | 24.9 | 54.8 | 40 | 0   |
| 1953 11 24    | 6 13    | NOT NAMED | 26.2 | 53.2 | 40 | 0   |
| 1953 11 24 12 | 13      | NOT NAMED | 27.5 | 52.0 | 45 | 0   |

|      |    |    |    |    |           |      |       |    |   |
|------|----|----|----|----|-----------|------|-------|----|---|
| 1953 | 11 | 24 | 18 | 13 | NOT NAMED | 28.3 | 52.4  | 45 | 0 |
| 1953 | 11 | 25 | 0  | 13 | NOT NAMED | 28.7 | 53.5  | 45 | 0 |
| 1953 | 11 | 25 | 6  | 13 | NOT NAMED | 28.8 | 54.8  | 45 | 0 |
| 1953 | 11 | 25 | 12 | 13 | NOT NAMED | 29.0 | 56.0  | 45 | 0 |
| 1953 | 11 | 25 | 18 | 13 | NOT NAMED | 29.4 | 56.7  | 40 | 0 |
| 1953 | 11 | 26 | 0  | 13 | NOT NAMED | 30.2 | 57.1  | 40 | 0 |
| 1953 | 11 | 26 | 6  | 13 | NOT NAMED | 31.2 | 57.1  | 35 | 0 |
| 1953 | 11 | 26 | 12 | 13 | NOT NAMED | 32.2 | 57.1  | 30 | 0 |
| 1953 | 11 | 26 | 18 | 13 | NOT NAMED | 33.4 | 57.1  | 25 | 0 |
| 1953 | 12 | 7  | 18 | 14 | NOT NAMED | 20.8 | 51.5  | 30 | 0 |
| 1953 | 12 | 8  | 0  | 14 | NOT NAMED | 20.8 | 53.1  | 35 | 0 |
| 1953 | 12 | 8  | 6  | 14 | NOT NAMED | 20.9 | 53.8  | 35 | 0 |
| 1953 | 12 | 8  | 12 | 14 | NOT NAMED | 20.9 | 54.6  | 35 | 0 |
| 1953 | 12 | 8  | 18 | 14 | NOT NAMED | 21.0 | 56.0  | 35 | 0 |
| 1953 | 12 | 9  | 0  | 14 | NOT NAMED | 21.0 | 57.6  | 35 | 0 |
| 1953 | 12 | 9  | 6  | 14 | NOT NAMED | 21.1 | 58.6  | 35 | 0 |
| 1953 | 12 | 9  | 12 | 14 | NOT NAMED | 21.2 | 59.6  | 30 | 0 |
| 1953 | 12 | 9  | 18 | 14 | NOT NAMED | 21.4 | 60.7  | 25 | 0 |
| 1954 | 6  | 24 | 12 | 1  | ALICE     | 22.0 | 94.0  | 50 | 0 |
| 1954 | 6  | 24 | 18 | 1  | ALICE     | 23.1 | 94.9  | 50 | 0 |
| 1954 | 6  | 25 | 0  | 1  | ALICE     | 24.0 | 95.7  | 65 | 0 |
| 1954 | 6  | 25 | 6  | 1  | ALICE     | 24.4 | 96.5  | 70 | 0 |
| 1954 | 6  | 25 | 12 | 1  | ALICE     | 24.9 | 97.2  | 70 | 0 |
| 1954 | 6  | 25 | 18 | 1  | ALICE     | 26.0 | 98.3  | 50 | 0 |
| 1954 | 6  | 26 | 0  | 1  | ALICE     | 27.1 | 99.2  | 40 | 0 |
| 1954 | 6  | 26 | 6  | 1  | ALICE     | 27.8 | 99.8  | 25 | 0 |
| 1954 | 6  | 26 | 12 | 1  | ALICE     | 28.5 | 100.3 | 25 | 0 |
| 1954 | 6  | 26 | 18 | 1  | ALICE     | 29.2 | 100.8 | 25 | 0 |
| 1954 | 7  | 27 | 6  | 2  | BARBARA   | 27.8 | 89.9  | 25 | 0 |
| 1954 | 7  | 27 | 12 | 2  | BARBARA   | 27.8 | 90.1  | 25 | 0 |
| 1954 | 7  | 27 | 18 | 2  | BARBARA   | 27.9 | 90.3  | 30 | 0 |
| 1954 | 7  | 28 | 0  | 2  | BARBARA   | 28.0 | 90.5  | 35 | 0 |
| 1954 | 7  | 28 | 6  | 2  | BARBARA   | 28.0 | 90.7  | 35 | 0 |
| 1954 | 7  | 28 | 12 | 2  | BARBARA   | 28.1 | 91.0  | 35 | 0 |
| 1954 | 7  | 28 | 18 | 2  | BARBARA   | 28.3 | 91.4  | 40 | 0 |
| 1954 | 7  | 29 | 0  | 2  | BARBARA   | 28.8 | 91.8  | 40 | 0 |
| 1954 | 7  | 29 | 6  | 2  | BARBARA   | 29.4 | 92.3  | 35 | 0 |
| 1954 | 7  | 29 | 12 | 2  | BARBARA   | 30.0 | 92.8  | 30 | 0 |
| 1954 | 7  | 29 | 18 | 2  | BARBARA   | 30.2 | 93.5  | 25 | 0 |
| 1954 | 7  | 30 | 0  | 2  | BARBARA   | 30.5 | 94.4  | 25 | 0 |
| 1954 | 7  | 30 | 6  | 2  | BARBARA   | 31.0 | 95.6  | 25 | 0 |
| 1954 | 7  | 30 | 12 | 2  | BARBARA   | 31.5 | 96.7  | 25 | 0 |
| 1954 | 7  | 30 | 18 | 2  | BARBARA   | 32.2 | 97.9  | 20 | 0 |
| 1954 | 8  | 25 | 12 | 3  | CAROL     | 24.0 | 74.9  | 30 | 0 |

|      |         |         |      |      |    |     |
|------|---------|---------|------|------|----|-----|
| 1954 | 8 25 18 | 3 CAROL | 25.1 | 75.5 | 40 | 0   |
| 1954 | 8 26 0  | 3 CAROL | 26.1 | 76.0 | 45 | 0   |
| 1954 | 8 26 6  | 3 CAROL | 27.0 | 76.3 | 55 | 0   |
| 1954 | 8 26 12 | 3 CAROL | 27.7 | 76.4 | 60 | 0   |
| 1954 | 8 26 18 | 3 CAROL | 28.4 | 76.3 | 60 | 0   |
| 1954 | 8 27 0  | 3 CAROL | 28.9 | 76.2 | 70 | 0   |
| 1954 | 8 27 6  | 3 CAROL | 29.3 | 76.3 | 75 | 0   |
| 1954 | 8 27 12 | 3 CAROL | 29.6 | 76.5 | 80 | 0   |
| 1954 | 8 27 18 | 3 CAROL | 29.8 | 76.6 | 85 | 0   |
| 1954 | 8 28 0  | 3 CAROL | 29.9 | 76.7 | 85 | 0   |
| 1954 | 8 28 6  | 3 CAROL | 30.1 | 76.9 | 85 | 0   |
| 1954 | 8 28 12 | 3 CAROL | 30.3 | 77.2 | 85 | 0   |
| 1954 | 8 28 18 | 3 CAROL | 30.4 | 77.4 | 85 | 0   |
| 1954 | 8 29 0  | 3 CAROL | 30.5 | 77.6 | 85 | 0   |
| 1954 | 8 29 6  | 3 CAROL | 30.7 | 77.8 | 80 | 0   |
| 1954 | 8 29 12 | 3 CAROL | 30.9 | 77.9 | 80 | 0   |
| 1954 | 8 29 18 | 3 CAROL | 31.2 | 78.0 | 80 | 0   |
| 1954 | 8 30 0  | 3 CAROL | 31.5 | 78.1 | 80 | 0   |
| 1954 | 8 30 6  | 3 CAROL | 31.9 | 78.0 | 85 | 0   |
| 1954 | 8 30 12 | 3 CAROL | 32.5 | 77.6 | 85 | 0   |
| 1954 | 8 30 18 | 3 CAROL | 33.1 | 77.0 | 85 | 0   |
| 1954 | 8 31 0  | 3 CAROL | 34.2 | 76.1 | 85 | 0   |
| 1954 | 8 31 6  | 3 CAROL | 37.3 | 74.2 | 85 | 0   |
| 1954 | 8 31 12 | 3 CAROL | 40.2 | 72.9 | 85 | 0   |
| 1954 | 8 31 18 | 3 CAROL | 43.1 | 71.8 | 75 | 976 |
| 1954 | 9 1 0   | 3 CAROL | 46.2 | 71.1 | 60 | 987 |
| 1954 | 9 1 6   | 3 CAROL | 48.9 | 71.2 | 50 | 992 |
| 1954 | 8 31 6  | 4 DOLLY | 19.3 | 67.7 | 30 | 0   |
| 1954 | 8 31 12 | 4 DOLLY | 20.9 | 68.4 | 45 | 0   |
| 1954 | 8 31 18 | 4 DOLLY | 22.8 | 69.0 | 55 | 0   |
| 1954 | 9 1 0   | 4 DOLLY | 24.8 | 69.5 | 65 | 0   |
| 1954 | 9 1 6   | 4 DOLLY | 26.8 | 69.9 | 75 | 0   |
| 1954 | 9 1 12  | 4 DOLLY | 29.0 | 70.2 | 85 | 0   |
| 1954 | 9 1 18  | 4 DOLLY | 31.7 | 70.1 | 85 | 0   |
| 1954 | 9 2 0   | 4 DOLLY | 34.6 | 69.3 | 75 | 0   |
| 1954 | 9 2 6   | 4 DOLLY | 37.2 | 66.9 | 70 | 0   |
| 1954 | 9 2 12  | 4 DOLLY | 39.7 | 64.2 | 70 | 0   |
| 1954 | 9 2 18  | 4 DOLLY | 42.1 | 60.5 | 70 | 0   |
| 1954 | 9 3 0   | 4 DOLLY | 44.3 | 56.4 | 65 | 0   |
| 1954 | 9 3 6   | 4 DOLLY | 45.8 | 51.9 | 55 | 0   |
| 1954 | 9 3 12  | 4 DOLLY | 46.8 | 47.4 | 50 | 0   |
| 1954 | 9 3 18  | 4 DOLLY | 47.6 | 42.9 | 45 | 0   |
| 1954 | 9 4 0   | 4 DOLLY | 48.3 | 38.3 | 40 | 0   |
| 1954 | 9 4 6   | 4 DOLLY | 49.0 | 33.5 | 40 | 0   |

|      |   |    |    |   |       |      |      |     |   |
|------|---|----|----|---|-------|------|------|-----|---|
| 1954 | 9 | 4  | 12 | 4 | DOLLY | 49.7 | 28.8 | 35  | 0 |
| 1954 | 9 | 2  | 6  | 5 | EDNA  | 11.2 | 56.4 | 25  | 0 |
| 1954 | 9 | 2  | 12 | 5 | EDNA  | 12.1 | 57.1 | 25  | 0 |
| 1954 | 9 | 2  | 18 | 5 | EDNA  | 13.1 | 57.5 | 25  | 0 |
| 1954 | 9 | 3  | 0  | 5 | EDNA  | 14.2 | 58.0 | 25  | 0 |
| 1954 | 9 | 3  | 6  | 5 | EDNA  | 15.3 | 58.6 | 25  | 0 |
| 1954 | 9 | 3  | 12 | 5 | EDNA  | 16.4 | 59.2 | 25  | 0 |
| 1954 | 9 | 3  | 18 | 5 | EDNA  | 17.1 | 59.8 | 25  | 0 |
| 1954 | 9 | 4  | 0  | 5 | EDNA  | 17.8 | 60.6 | 25  | 0 |
| 1954 | 9 | 4  | 6  | 5 | EDNA  | 18.6 | 61.6 | 30  | 0 |
| 1954 | 9 | 4  | 12 | 5 | EDNA  | 19.3 | 62.8 | 35  | 0 |
| 1954 | 9 | 4  | 18 | 5 | EDNA  | 19.9 | 64.1 | 35  | 0 |
| 1954 | 9 | 5  | 0  | 5 | EDNA  | 20.4 | 65.3 | 35  | 0 |
| 1954 | 9 | 5  | 6  | 5 | EDNA  | 20.7 | 66.2 | 35  | 0 |
| 1954 | 9 | 5  | 12 | 5 | EDNA  | 20.9 | 66.9 | 35  | 0 |
| 1954 | 9 | 5  | 18 | 5 | EDNA  | 21.0 | 67.6 | 35  | 0 |
| 1954 | 9 | 6  | 0  | 5 | EDNA  | 21.2 | 68.2 | 40  | 0 |
| 1954 | 9 | 6  | 6  | 5 | EDNA  | 21.4 | 68.8 | 45  | 0 |
| 1954 | 9 | 6  | 12 | 5 | EDNA  | 21.5 | 69.4 | 50  | 0 |
| 1954 | 9 | 6  | 18 | 5 | EDNA  | 21.8 | 70.1 | 55  | 0 |
| 1954 | 9 | 7  | 0  | 5 | EDNA  | 22.2 | 70.8 | 65  | 0 |
| 1954 | 9 | 7  | 6  | 5 | EDNA  | 22.5 | 71.5 | 70  | 0 |
| 1954 | 9 | 7  | 12 | 5 | EDNA  | 23.0 | 72.2 | 70  | 0 |
| 1954 | 9 | 7  | 18 | 5 | EDNA  | 23.7 | 73.4 | 70  | 0 |
| 1954 | 9 | 8  | 0  | 5 | EDNA  | 24.5 | 74.4 | 75  | 0 |
| 1954 | 9 | 8  | 6  | 5 | EDNA  | 25.2 | 74.8 | 95  | 0 |
| 1954 | 9 | 8  | 12 | 5 | EDNA  | 25.9 | 75.2 | 100 | 0 |
| 1954 | 9 | 8  | 18 | 5 | EDNA  | 26.6 | 75.6 | 105 | 0 |
| 1954 | 9 | 9  | 0  | 5 | EDNA  | 27.3 | 75.9 | 105 | 0 |
| 1954 | 9 | 9  | 6  | 5 | EDNA  | 28.0 | 76.1 | 105 | 0 |
| 1954 | 9 | 9  | 12 | 5 | EDNA  | 28.7 | 76.1 | 105 | 0 |
| 1954 | 9 | 9  | 18 | 5 | EDNA  | 29.3 | 76.1 | 105 | 0 |
| 1954 | 9 | 10 | 0  | 5 | EDNA  | 29.8 | 76.1 | 105 | 0 |
| 1954 | 9 | 10 | 6  | 5 | EDNA  | 30.6 | 76.1 | 105 | 0 |
| 1954 | 9 | 10 | 12 | 5 | EDNA  | 31.7 | 76.1 | 105 | 0 |
| 1954 | 9 | 10 | 18 | 5 | EDNA  | 33.0 | 75.8 | 105 | 0 |
| 1954 | 9 | 11 | 0  | 5 | EDNA  | 34.5 | 75.3 | 105 | 0 |
| 1954 | 9 | 11 | 6  | 5 | EDNA  | 36.0 | 74.4 | 100 | 0 |
| 1954 | 9 | 11 | 12 | 5 | EDNA  | 38.0 | 73.0 | 90  | 0 |
| 1954 | 9 | 11 | 18 | 5 | EDNA  | 41.2 | 70.8 | 80  | 0 |
| 1954 | 9 | 12 | 0  | 5 | EDNA  | 44.9 | 67.9 | 65  | 0 |
| 1954 | 9 | 12 | 6  | 5 | EDNA  | 48.9 | 63.8 | 60  | 0 |
| 1954 | 9 | 12 | 12 | 5 | EDNA  | 52.4 | 60.5 | 55  | 0 |
| 1954 | 9 | 12 | 18 | 5 | EDNA  | 54.3 | 59.1 | 50  | 0 |

|      |      |    |             |      |      |    |   |
|------|------|----|-------------|------|------|----|---|
| 1954 | 9 13 | 0  | 5 EDNA      | 55.5 | 57.7 | 45 | 0 |
| 1954 | 9 13 | 6  | 5 EDNA      | 56.9 | 56.1 | 40 | 0 |
| 1954 | 9 13 | 12 | 5 EDNA      | 58.0 | 54.5 | 40 | 0 |
| 1954 | 9 13 | 18 | 5 EDNA      | 58.4 | 52.4 | 35 | 0 |
| 1954 | 9 14 | 0  | 5 EDNA      | 58.2 | 50.4 | 35 | 0 |
| 1954 | 9 14 | 6  | 5 EDNA      | 57.8 | 48.9 | 30 | 0 |
| 1954 | 9 14 | 12 | 5 EDNA      | 57.4 | 47.4 | 30 | 0 |
| 1954 | 9 14 | 18 | 5 EDNA      | 57.1 | 45.9 | 25 | 0 |
| 1954 | 9 15 | 0  | 5 EDNA      | 56.7 | 44.0 | 25 | 0 |
| 1954 | 9 15 | 6  | 5 EDNA      | 56.8 | 42.1 | 25 | 0 |
| 1954 | 9 11 | 6  | 6 FLORENCE  | 20.9 | 94.7 | 45 | 0 |
| 1954 | 9 11 | 12 | 6 FLORENCE  | 21.0 | 95.1 | 50 | 0 |
| 1954 | 9 11 | 18 | 6 FLORENCE  | 21.0 | 95.5 | 55 | 0 |
| 1954 | 9 12 | 0  | 6 FLORENCE  | 20.8 | 95.9 | 65 | 0 |
| 1954 | 9 12 | 6  | 6 FLORENCE  | 20.5 | 96.3 | 65 | 0 |
| 1954 | 9 12 | 12 | 6 FLORENCE  | 20.3 | 96.8 | 35 | 0 |
| 1954 | 9 12 | 18 | 6 FLORENCE  | 19.8 | 97.4 | 20 | 0 |
| 1954 | 9 24 | 18 | 7 GILDA     | 14.1 | 76.8 | 35 | 0 |
| 1954 | 9 25 | 0  | 7 GILDA     | 14.3 | 77.7 | 40 | 0 |
| 1954 | 9 25 | 6  | 7 GILDA     | 14.4 | 78.8 | 45 | 0 |
| 1954 | 9 25 | 12 | 7 GILDA     | 14.6 | 80.0 | 50 | 0 |
| 1954 | 9 25 | 18 | 7 GILDA     | 14.9 | 81.1 | 50 | 0 |
| 1954 | 9 26 | 0  | 7 GILDA     | 15.3 | 82.1 | 55 | 0 |
| 1954 | 9 26 | 6  | 7 GILDA     | 15.9 | 83.5 | 60 | 0 |
| 1954 | 9 26 | 12 | 7 GILDA     | 16.4 | 84.7 | 60 | 0 |
| 1954 | 9 26 | 18 | 7 GILDA     | 16.5 | 85.5 | 60 | 0 |
| 1954 | 9 27 | 0  | 7 GILDA     | 16.5 | 86.3 | 60 | 0 |
| 1954 | 9 27 | 6  | 7 GILDA     | 16.6 | 87.2 | 60 | 0 |
| 1954 | 9 27 | 12 | 7 GILDA     | 16.8 | 88.0 | 60 | 0 |
| 1954 | 9 27 | 18 | 7 GILDA     | 16.9 | 88.8 | 35 | 0 |
| 1954 | 9 25 | 6  | 8 NOT NAMED | 27.8 | 56.1 | 25 | 0 |
| 1954 | 9 25 | 12 | 8 NOT NAMED | 27.8 | 55.6 | 25 | 0 |
| 1954 | 9 25 | 18 | 8 NOT NAMED | 27.8 | 55.2 | 25 | 0 |
| 1954 | 9 26 | 0  | 8 NOT NAMED | 27.9 | 54.8 | 25 | 0 |
| 1954 | 9 26 | 6  | 8 NOT NAMED | 28.0 | 54.3 | 25 | 0 |
| 1954 | 9 26 | 12 | 8 NOT NAMED | 28.1 | 53.7 | 25 | 0 |
| 1954 | 9 26 | 18 | 8 NOT NAMED | 28.3 | 53.1 | 25 | 0 |
| 1954 | 9 27 | 0  | 8 NOT NAMED | 28.5 | 52.4 | 25 | 0 |
| 1954 | 9 27 | 6  | 8 NOT NAMED | 28.9 | 51.8 | 25 | 0 |
| 1954 | 9 27 | 12 | 8 NOT NAMED | 29.3 | 51.3 | 25 | 0 |
| 1954 | 9 27 | 18 | 8 NOT NAMED | 29.5 | 51.0 | 25 | 0 |
| 1954 | 9 28 | 0  | 8 NOT NAMED | 29.7 | 50.7 | 25 | 0 |
| 1954 | 9 28 | 6  | 8 NOT NAMED | 29.9 | 50.3 | 25 | 0 |
| 1954 | 9 28 | 12 | 8 NOT NAMED | 30.1 | 50.0 | 25 | 0 |



|      |    |    |    |             |      |      |     |   |
|------|----|----|----|-------------|------|------|-----|---|
| 1954 | 9  | 28 | 18 | 8 NOT NAMED | 30.3 | 49.7 | 25  | 0 |
| 1954 | 9  | 29 | 0  | 8 NOT NAMED | 30.6 | 49.4 | 25  | 0 |
| 1954 | 9  | 29 | 6  | 8 NOT NAMED | 30.9 | 49.1 | 30  | 0 |
| 1954 | 9  | 29 | 12 | 8 NOT NAMED | 31.2 | 48.7 | 30  | 0 |
| 1954 | 9  | 29 | 18 | 8 NOT NAMED | 31.6 | 48.4 | 35  | 0 |
| 1954 | 9  | 30 | 0  | 8 NOT NAMED | 32.0 | 48.3 | 40  | 0 |
| 1954 | 9  | 30 | 6  | 8 NOT NAMED | 32.3 | 48.3 | 45  | 0 |
| 1954 | 9  | 30 | 12 | 8 NOT NAMED | 32.5 | 48.6 | 45  | 0 |
| 1954 | 9  | 30 | 18 | 8 NOT NAMED | 32.7 | 49.3 | 45  | 0 |
| 1954 | 10 | 1  | 0  | 8 NOT NAMED | 32.8 | 49.9 | 50  | 0 |
| 1954 | 10 | 1  | 6  | 8 NOT NAMED | 32.8 | 50.5 | 55  | 0 |
| 1954 | 10 | 1  | 12 | 8 NOT NAMED | 32.6 | 51.2 | 60  | 0 |
| 1954 | 10 | 1  | 18 | 8 NOT NAMED | 31.9 | 52.0 | 60  | 0 |
| 1954 | 10 | 2  | 0  | 8 NOT NAMED | 31.0 | 53.0 | 65  | 0 |
| 1954 | 10 | 2  | 6  | 8 NOT NAMED | 30.4 | 53.9 | 70  | 0 |
| 1954 | 10 | 2  | 12 | 8 NOT NAMED | 29.9 | 54.7 | 70  | 0 |
| 1954 | 10 | 2  | 18 | 8 NOT NAMED | 29.8 | 55.7 | 70  | 0 |
| 1954 | 10 | 3  | 0  | 8 NOT NAMED | 29.7 | 56.6 | 70  | 0 |
| 1954 | 10 | 3  | 6  | 8 NOT NAMED | 30.5 | 57.0 | 70  | 0 |
| 1954 | 10 | 3  | 12 | 8 NOT NAMED | 31.3 | 56.5 | 70  | 0 |
| 1954 | 10 | 3  | 18 | 8 NOT NAMED | 32.2 | 55.6 | 70  | 0 |
| 1954 | 10 | 4  | 0  | 8 NOT NAMED | 33.0 | 54.7 | 75  | 0 |
| 1954 | 10 | 4  | 6  | 8 NOT NAMED | 33.4 | 53.9 | 80  | 0 |
| 1954 | 10 | 4  | 12 | 8 NOT NAMED | 33.7 | 53.0 | 80  | 0 |
| 1954 | 10 | 4  | 18 | 8 NOT NAMED | 34.2 | 51.7 | 80  | 0 |
| 1954 | 10 | 5  | 0  | 8 NOT NAMED | 34.7 | 50.1 | 80  | 0 |
| 1954 | 10 | 5  | 6  | 8 NOT NAMED | 35.2 | 49.1 | 85  | 0 |
| 1954 | 10 | 5  | 12 | 8 NOT NAMED | 35.8 | 47.8 | 85  | 0 |
| 1954 | 10 | 5  | 18 | 8 NOT NAMED | 37.1 | 44.4 | 85  | 0 |
| 1954 | 10 | 6  | 0  | 8 NOT NAMED | 38.9 | 40.4 | 80  | 0 |
| 1954 | 10 | 6  | 6  | 8 NOT NAMED | 40.8 | 37.4 | 75  | 0 |
| 1954 | 10 | 6  | 12 | 8 NOT NAMED | 43.2 | 34.5 | 70  | 0 |
| 1954 | 10 | 6  | 18 | 8 NOT NAMED | 47.4 | 31.7 | 65  | 0 |
| 1954 | 10 | 7  | 0  | 8 NOT NAMED | 54.2 | 29.0 | 60  | 0 |
| 1954 | 10 | 5  | 6  | 9 HAZEL     | 12.4 | 59.2 | 60  | 0 |
| 1954 | 10 | 5  | 12 | 9 HAZEL     | 12.7 | 60.2 | 60  | 0 |
| 1954 | 10 | 5  | 18 | 9 HAZEL     | 12.8 | 61.1 | 70  | 0 |
| 1954 | 10 | 6  | 0  | 9 HAZEL     | 12.9 | 62.1 | 75  | 0 |
| 1954 | 10 | 6  | 6  | 9 HAZEL     | 13.1 | 63.1 | 80  | 0 |
| 1954 | 10 | 6  | 12 | 9 HAZEL     | 13.2 | 64.1 | 85  | 0 |
| 1954 | 10 | 6  | 18 | 9 HAZEL     | 13.3 | 65.1 | 85  | 0 |
| 1954 | 10 | 7  | 0  | 9 HAZEL     | 13.3 | 66.1 | 90  | 0 |
| 1954 | 10 | 7  | 6  | 9 HAZEL     | 13.3 | 67.2 | 100 | 0 |
| 1954 | 10 | 7  | 12 | 9 HAZEL     | 13.3 | 68.2 | 105 | 0 |

|                       |      |      |     |     |
|-----------------------|------|------|-----|-----|
| 1954 10 7 18 9 HAZEL  | 13.3 | 69.1 | 105 | 0   |
| 1954 10 8 0 9 HAZEL   | 13.4 | 69.9 | 105 | 0   |
| 1954 10 8 6 9 HAZEL   | 13.5 | 70.9 | 110 | 0   |
| 1954 10 8 12 9 HAZEL  | 13.6 | 71.9 | 110 | 0   |
| 1954 10 8 18 9 HAZEL  | 13.6 | 72.5 | 110 | 0   |
| 1954 10 9 0 9 HAZEL   | 13.6 | 73.1 | 115 | 0   |
| 1954 10 9 6 9 HAZEL   | 13.6 | 73.7 | 115 | 0   |
| 1954 10 9 12 9 HAZEL  | 13.7 | 74.2 | 115 | 0   |
| 1954 10 9 18 9 HAZEL  | 13.9 | 74.8 | 115 | 0   |
| 1954 10 10 0 9 HAZEL  | 14.2 | 75.3 | 115 | 0   |
| 1954 10 10 6 9 HAZEL  | 14.6 | 75.6 | 110 | 0   |
| 1954 10 10 12 9 HAZEL | 15.0 | 75.6 | 105 | 0   |
| 1954 10 10 18 9 HAZEL | 15.4 | 75.6 | 105 | 0   |
| 1954 10 11 0 9 HAZEL  | 15.7 | 75.5 | 105 | 0   |
| 1954 10 11 6 9 HAZEL  | 16.1 | 75.3 | 105 | 0   |
| 1954 10 11 12 9 HAZEL | 16.5 | 75.1 | 105 | 0   |
| 1954 10 11 18 9 HAZEL | 17.1 | 74.8 | 105 | 0   |
| 1954 10 12 0 9 HAZEL  | 17.7 | 74.4 | 105 | 0   |
| 1954 10 12 6 9 HAZEL  | 18.2 | 74.1 | 85  | 0   |
| 1954 10 12 12 9 HAZEL | 18.7 | 73.8 | 85  | 0   |
| 1954 10 12 18 9 HAZEL | 19.3 | 73.5 | 85  | 0   |
| 1954 10 13 0 9 HAZEL  | 19.9 | 73.3 | 85  | 0   |
| 1954 10 13 6 9 HAZEL  | 20.5 | 73.2 | 85  | 0   |
| 1954 10 13 12 9 HAZEL | 21.0 | 73.2 | 85  | 994 |
| 1954 10 13 18 9 HAZEL | 21.6 | 73.3 | 85  | 0   |
| 1954 10 14 0 9 HAZEL  | 22.6 | 73.5 | 90  | 0   |
| 1954 10 14 6 9 HAZEL  | 24.0 | 73.9 | 100 | 0   |
| 1954 10 14 12 9 HAZEL | 25.5 | 74.6 | 105 | 0   |
| 1954 10 14 18 9 HAZEL | 27.0 | 75.7 | 110 | 0   |
| 1954 10 15 0 9 HAZEL  | 28.6 | 76.8 | 115 | 0   |
| 1954 10 15 6 9 HAZEL  | 30.2 | 77.8 | 120 | 0   |
| 1954 10 15 12 9 HAZEL | 32.8 | 78.7 | 110 | 937 |
| 1954 10 15 18 9 HAZEL | 36.8 | 78.2 | 80  | 970 |
| 1954 10 16 0 9 HAZEL  | 41.0 | 77.4 | 70  | 0   |
| 1954 10 16 6 9 HAZEL  | 45.2 | 78.6 | 60  | 0   |
| 1954 10 16 12 9 HAZEL | 48.8 | 80.0 | 50  | 0   |
| 1954 10 16 18 9 HAZEL | 50.7 | 80.0 | 45  | 0   |
| 1954 10 17 0 9 HAZEL  | 51.7 | 79.9 | 45  | 0   |
| 1954 10 17 6 9 HAZEL  | 52.8 | 79.2 | 35  | 0   |
| 1954 10 17 12 9 HAZEL | 54.0 | 78.2 | 35  | 0   |
| 1954 10 17 18 9 HAZEL | 55.6 | 76.2 | 35  | 0   |
| 1954 10 18 0 9 HAZEL  | 57.0 | 73.0 | 30  | 0   |
| 1954 10 18 6 9 HAZEL  | 58.1 | 69.4 | 25  | 0   |
| 1954 10 18 12 9 HAZEL | 58.8 | 65.1 | 25  | 0   |

|                            |      |      |    |      |
|----------------------------|------|------|----|------|
| 1954 11 16 18 10 NOT NAMED | 23.7 | 43.8 | 30 | 0    |
| 1954 11 17 0 10 NOT NAMED  | 23.8 | 44.5 | 35 | 0    |
| 1954 11 17 6 10 NOT NAMED  | 23.9 | 45.0 | 40 | 0    |
| 1954 11 17 12 10 NOT NAMED | 23.9 | 45.5 | 45 | 0    |
| 1954 11 17 18 10 NOT NAMED | 23.9 | 46.2 | 45 | 0    |
| 1954 11 18 0 10 NOT NAMED  | 23.9 | 47.0 | 45 | 0    |
| 1954 11 18 6 10 NOT NAMED  | 24.0 | 47.5 | 45 | 0    |
| 1954 11 18 12 10 NOT NAMED | 24.0 | 48.0 | 45 | 0    |
| 1954 11 18 18 10 NOT NAMED | 24.0 | 48.6 | 45 | 0    |
| 1954 11 19 0 10 NOT NAMED  | 24.0 | 49.2 | 45 | 0    |
| 1954 11 19 6 10 NOT NAMED  | 24.0 | 49.9 | 45 | 0    |
| 1954 11 19 12 10 NOT NAMED | 24.0 | 50.7 | 45 | 0    |
| 1954 11 19 18 10 NOT NAMED | 24.0 | 51.6 | 45 | 0    |
| 1954 11 20 0 10 NOT NAMED  | 24.0 | 52.5 | 45 | 0    |
| 1954 11 20 6 10 NOT NAMED  | 24.3 | 53.3 | 45 | 0    |
| 1954 11 20 12 10 NOT NAMED | 24.8 | 54.1 | 45 | 0    |
| 1954 11 20 18 10 NOT NAMED | 25.2 | 54.8 | 45 | 0    |
| 1954 11 21 0 10 NOT NAMED  | 25.5 | 55.6 | 45 | 0    |
| 1954 11 21 6 10 NOT NAMED  | 25.6 | 56.3 | 40 | 0    |
| 1954 11 21 12 10 NOT NAMED | 25.8 | 57.1 | 30 | 0    |
| 1954 11 21 18 10 NOT NAMED | 25.6 | 57.8 | 25 | 0    |
| 1954 12 30 6 11 ALICE      | 22.1 | 50.9 | 30 | 0    |
| 1954 12 30 12 11 ALICE     | 22.0 | 51.6 | 35 | 1007 |
| 1954 12 30 18 11 ALICE     | 21.6 | 52.4 | 40 | 0    |
| 1954 12 31 0 11 ALICE      | 21.3 | 53.3 | 50 | 0    |
| 1954 12 31 6 11 ALICE      | 21.0 | 54.3 | 55 | 0    |
| 1954 12 31 12 11 ALICE     | 20.6 | 55.2 | 65 | 0    |
| 1954 12 31 18 11 ALICE     | 20.3 | 56.0 | 65 | 0    |
| 1954 1 1 0 11 ALICE        | 20.1 | 56.8 | 65 | 0    |
| 1954 1 1 6 11 ALICE        | 19.9 | 57.4 | 65 | 0    |
| 1954 1 1 12 11 ALICE       | 19.7 | 58.1 | 65 | 0    |
| 1954 1 1 18 11 ALICE       | 19.3 | 59.2 | 65 | 0    |
| 1954 1 2 0 11 ALICE        | 18.8 | 60.5 | 65 | 0    |
| 1954 1 2 6 11 ALICE        | 18.4 | 61.6 | 65 | 0    |
| 1954 1 2 12 11 ALICE       | 18.0 | 62.4 | 65 | 0    |
| 1954 1 2 18 11 ALICE       | 17.8 | 62.8 | 65 | 0    |
| 1954 1 3 0 11 ALICE        | 17.6 | 63.2 | 70 | 0    |
| 1954 1 3 6 11 ALICE        | 17.3 | 63.6 | 70 | 0    |
| 1954 1 3 12 11 ALICE       | 17.0 | 64.0 | 70 | 0    |
| 1954 1 3 18 11 ALICE       | 16.5 | 64.7 | 70 | 0    |
| 1954 1 4 0 11 ALICE        | 16.0 | 65.3 | 65 | 0    |
| 1954 1 4 6 11 ALICE        | 15.5 | 65.2 | 65 | 0    |
| 1954 1 4 12 11 ALICE       | 15.1 | 64.9 | 55 | 0    |
| 1954 1 4 18 11 ALICE       | 14.7 | 64.4 | 50 | 0    |

|      |   |    |    |    |        |      |      |     |      |
|------|---|----|----|----|--------|------|------|-----|------|
| 1954 | 1 | 5  | 0  | 11 | ALICE  | 14.4 | 64.0 | 40  | 0    |
| 1954 | 1 | 5  | 6  | 11 | ALICE  | 14.0 | 63.6 | 35  | 0    |
| 1954 | 1 | 5  | 12 | 11 | ALICE  | 13.6 | 63.3 | 30  | 0    |
| 1954 | 1 | 5  | 18 | 11 | ALICE  | 13.3 | 63.1 | 25  | 0    |
| 1954 | 1 | 6  | 0  | 11 | ALICE  | 13.0 | 63.0 | 25  | 0    |
| 1954 | 1 | 6  | 6  | 11 | ALICE  | 12.8 | 63.0 | 25  | 0    |
| 1955 | 7 | 31 | 18 | 1  | BRENDA | 27.5 | 88.4 | 50  | 0    |
| 1955 | 8 | 1  | 0  | 1  | BRENDA | 28.2 | 88.6 | 55  | 0    |
| 1955 | 8 | 1  | 6  | 1  | BRENDA | 28.8 | 88.8 | 60  | 0    |
| 1955 | 8 | 1  | 12 | 1  | BRENDA | 29.3 | 89.0 | 60  | 0    |
| 1955 | 8 | 1  | 18 | 1  | BRENDA | 29.9 | 89.5 | 55  | 0    |
| 1955 | 8 | 2  | 0  | 1  | BRENDA | 30.6 | 90.4 | 45  | 0    |
| 1955 | 8 | 2  | 6  | 1  | BRENDA | 31.1 | 91.6 | 35  | 0    |
| 1955 | 8 | 2  | 12 | 1  | BRENDA | 31.5 | 92.8 | 30  | 0    |
| 1955 | 8 | 2  | 18 | 1  | BRENDA | 31.8 | 93.8 | 25  | 0    |
| 1955 | 8 | 3  | 0  | 1  | BRENDA | 32.1 | 95.0 | 25  | 0    |
| 1955 | 8 | 3  | 6  | 1  | BRENDA | 32.5 | 96.2 | 25  | 0    |
| 1955 | 8 | 3  | 6  | 2  | CONNIE | 15.3 | 35.6 | 30  | 0    |
| 1955 | 8 | 3  | 12 | 2  | CONNIE | 15.7 | 39.2 | 35  | 0    |
| 1955 | 8 | 3  | 18 | 2  | CONNIE | 16.1 | 42.7 | 40  | 0    |
| 1955 | 8 | 4  | 0  | 2  | CONNIE | 16.4 | 45.3 | 40  | 0    |
| 1955 | 8 | 4  | 6  | 2  | CONNIE | 16.7 | 47.0 | 40  | 0    |
| 1955 | 8 | 4  | 12 | 2  | CONNIE | 17.0 | 48.7 | 45  | 1002 |
| 1955 | 8 | 4  | 18 | 2  | CONNIE | 17.4 | 50.9 | 50  | 0    |
| 1955 | 8 | 5  | 0  | 2  | CONNIE | 17.7 | 53.0 | 60  | 0    |
| 1955 | 8 | 5  | 6  | 2  | CONNIE | 18.0 | 54.9 | 95  | 0    |
| 1955 | 8 | 5  | 12 | 2  | CONNIE | 18.3 | 56.6 | 110 | 985  |
| 1955 | 8 | 5  | 18 | 2  | CONNIE | 18.7 | 57.7 | 115 | 0    |
| 1955 | 8 | 6  | 0  | 2  | CONNIE | 19.0 | 58.8 | 120 | 0    |
| 1955 | 8 | 6  | 6  | 2  | CONNIE | 19.3 | 60.3 | 120 | 0    |
| 1955 | 8 | 6  | 12 | 2  | CONNIE | 19.6 | 61.9 | 125 | 982  |
| 1955 | 8 | 6  | 18 | 2  | CONNIE | 19.7 | 63.6 | 125 | 0    |
| 1955 | 8 | 7  | 0  | 2  | CONNIE | 20.2 | 65.2 | 125 | 0    |
| 1955 | 8 | 7  | 6  | 2  | CONNIE | 20.9 | 66.7 | 125 | 0    |
| 1955 | 8 | 7  | 12 | 2  | CONNIE | 22.0 | 68.0 | 125 | 952  |
| 1955 | 8 | 7  | 18 | 2  | CONNIE | 22.9 | 69.1 | 125 | 944  |
| 1955 | 8 | 8  | 0  | 2  | CONNIE | 23.9 | 70.0 | 125 | 0    |
| 1955 | 8 | 8  | 6  | 2  | CONNIE | 25.0 | 70.8 | 125 | 0    |
| 1955 | 8 | 8  | 12 | 2  | CONNIE | 26.2 | 71.5 | 125 | 944  |
| 1955 | 8 | 8  | 18 | 2  | CONNIE | 27.3 | 72.0 | 125 | 936  |
| 1955 | 8 | 9  | 0  | 2  | CONNIE | 28.3 | 72.6 | 125 | 0    |
| 1955 | 8 | 9  | 6  | 2  | CONNIE | 29.2 | 73.2 | 125 | 0    |
| 1955 | 8 | 9  | 12 | 2  | CONNIE | 29.7 | 73.7 | 125 | 958  |
| 1955 | 8 | 9  | 18 | 2  | CONNIE | 30.0 | 74.2 | 125 | 954  |

|      |      |    |   |        |      |      |     |      |
|------|------|----|---|--------|------|------|-----|------|
| 1955 | 8 10 | 0  | 2 | CONNIE | 30.4 | 74.6 | 125 | 0    |
| 1955 | 8 10 | 6  | 2 | CONNIE | 30.6 | 74.9 | 125 | 977  |
| 1955 | 8 10 | 12 | 2 | CONNIE | 30.8 | 75.3 | 125 | 970  |
| 1955 | 8 10 | 18 | 2 | CONNIE | 30.9 | 76.0 | 120 | 0    |
| 1955 | 8 11 | 0  | 2 | CONNIE | 31.1 | 76.8 | 115 | 0    |
| 1955 | 8 11 | 6  | 2 | CONNIE | 31.5 | 76.9 | 105 | 0    |
| 1955 | 8 11 | 12 | 2 | CONNIE | 32.1 | 77.0 | 95  | 975  |
| 1955 | 8 11 | 18 | 2 | CONNIE | 32.8 | 77.0 | 90  | 0    |
| 1955 | 8 12 | 0  | 2 | CONNIE | 33.6 | 77.0 | 85  | 0    |
| 1955 | 8 12 | 6  | 2 | CONNIE | 34.2 | 76.6 | 80  | 0    |
| 1955 | 8 12 | 12 | 2 | CONNIE | 34.8 | 76.2 | 70  | 965  |
| 1955 | 8 12 | 18 | 2 | CONNIE | 35.6 | 76.0 | 65  | 962  |
| 1955 | 8 13 | 0  | 2 | CONNIE | 36.6 | 75.9 | 60  | 969  |
| 1955 | 8 13 | 6  | 2 | CONNIE | 37.9 | 75.9 | 50  | 974  |
| 1955 | 8 13 | 12 | 2 | CONNIE | 39.2 | 76.4 | 45  | 982  |
| 1955 | 8 13 | 18 | 2 | CONNIE | 40.7 | 77.4 | 35  | 995  |
| 1955 | 8 14 | 0  | 2 | CONNIE | 42.0 | 78.7 | 30  | 998  |
| 1955 | 8 14 | 6  | 2 | CONNIE | 42.9 | 80.2 | 25  | 1002 |
| 1955 | 8 14 | 12 | 2 | CONNIE | 43.7 | 81.6 | 25  | 1006 |
| 1955 | 8 14 | 18 | 2 | CONNIE | 44.5 | 82.6 | 25  | 1010 |
| 1955 | 8 15 | 0  | 2 | CONNIE | 45.4 | 83.0 | 25  | 0    |
| 1955 | 8 15 | 6  | 2 | CONNIE | 46.3 | 83.0 | 25  | 0    |
| 1955 | 8 7  | 6  | 3 | DIANE  | 17.0 | 43.0 | 25  | 0    |
| 1955 | 8 7  | 12 | 3 | DIANE  | 17.1 | 44.0 | 25  | 0    |
| 1955 | 8 7  | 18 | 3 | DIANE  | 17.2 | 45.1 | 25  | 0    |
| 1955 | 8 8  | 0  | 3 | DIANE  | 17.3 | 46.1 | 25  | 0    |
| 1955 | 8 8  | 6  | 3 | DIANE  | 17.5 | 46.9 | 25  | 0    |
| 1955 | 8 8  | 12 | 3 | DIANE  | 17.7 | 47.8 | 25  | 0    |
| 1955 | 8 8  | 18 | 3 | DIANE  | 17.9 | 49.0 | 25  | 0    |
| 1955 | 8 9  | 0  | 3 | DIANE  | 18.0 | 50.2 | 25  | 0    |
| 1955 | 8 9  | 6  | 3 | DIANE  | 18.2 | 51.4 | 30  | 0    |
| 1955 | 8 9  | 12 | 3 | DIANE  | 18.5 | 52.6 | 30  | 0    |
| 1955 | 8 9  | 18 | 3 | DIANE  | 18.9 | 54.3 | 35  | 0    |
| 1955 | 8 10 | 0  | 3 | DIANE  | 19.3 | 55.9 | 35  | 0    |
| 1955 | 8 10 | 6  | 3 | DIANE  | 19.8 | 57.0 | 35  | 0    |
| 1955 | 8 10 | 12 | 3 | DIANE  | 20.3 | 58.0 | 35  | 0    |
| 1955 | 8 10 | 18 | 3 | DIANE  | 21.1 | 58.9 | 40  | 0    |
| 1955 | 8 11 | 0  | 3 | DIANE  | 22.0 | 59.8 | 45  | 0    |
| 1955 | 8 11 | 6  | 3 | DIANE  | 22.7 | 60.4 | 50  | 0    |
| 1955 | 8 11 | 12 | 3 | DIANE  | 23.3 | 60.8 | 55  | 0    |
| 1955 | 8 11 | 18 | 3 | DIANE  | 23.6 | 61.1 | 60  | 0    |
| 1955 | 8 12 | 0  | 3 | DIANE  | 24.0 | 61.1 | 65  | 0    |
| 1955 | 8 12 | 6  | 3 | DIANE  | 24.7 | 61.0 | 90  | 0    |
| 1955 | 8 12 | 12 | 3 | DIANE  | 25.3 | 60.8 | 105 | 975  |

|      |         |   |       |      |      |     |      |
|------|---------|---|-------|------|------|-----|------|
| 1955 | 8 12 18 | 3 | DIANE | 25.9 | 60.7 | 105 | 0    |
| 1955 | 8 13 0  | 3 | DIANE | 26.4 | 60.5 | 105 | 0    |
| 1955 | 8 13 6  | 3 | DIANE | 26.9 | 60.5 | 105 | 969  |
| 1955 | 8 13 12 | 3 | DIANE | 27.4 | 61.0 | 105 | 0    |
| 1955 | 8 13 18 | 3 | DIANE | 27.4 | 62.2 | 105 | 0    |
| 1955 | 8 14 0  | 3 | DIANE | 27.2 | 63.4 | 105 | 0    |
| 1955 | 8 14 6  | 3 | DIANE | 27.3 | 64.4 | 105 | 0    |
| 1955 | 8 14 12 | 3 | DIANE | 27.4 | 65.4 | 105 | 0    |
| 1955 | 8 14 18 | 3 | DIANE | 27.6 | 66.7 | 105 | 0    |
| 1955 | 8 15 0  | 3 | DIANE | 28.0 | 68.1 | 100 | 0    |
| 1955 | 8 15 6  | 3 | DIANE | 28.5 | 69.4 | 95  | 0    |
| 1955 | 8 15 12 | 3 | DIANE | 29.1 | 70.6 | 95  | 0    |
| 1955 | 8 15 18 | 3 | DIANE | 29.6 | 72.0 | 90  | 0    |
| 1955 | 8 16 0  | 3 | DIANE | 30.2 | 73.4 | 85  | 0    |
| 1955 | 8 16 6  | 3 | DIANE | 30.7 | 74.3 | 85  | 0    |
| 1955 | 8 16 12 | 3 | DIANE | 31.2 | 75.0 | 85  | 0    |
| 1955 | 8 16 18 | 3 | DIANE | 32.0 | 76.0 | 80  | 0    |
| 1955 | 8 17 0  | 3 | DIANE | 32.8 | 76.9 | 75  | 0    |
| 1955 | 8 17 6  | 3 | DIANE | 33.5 | 77.5 | 75  | 0    |
| 1955 | 8 17 12 | 3 | DIANE | 34.3 | 78.0 | 60  | 986  |
| 1955 | 8 17 18 | 3 | DIANE | 35.4 | 78.5 | 60  | 990  |
| 1955 | 8 18 0  | 3 | DIANE | 36.6 | 79.0 | 60  | 993  |
| 1955 | 8 18 6  | 3 | DIANE | 37.7 | 79.0 | 55  | 999  |
| 1955 | 8 18 12 | 3 | DIANE | 38.8 | 78.1 | 50  | 1001 |
| 1955 | 8 18 18 | 3 | DIANE | 39.6 | 76.8 | 45  | 1004 |
| 1955 | 8 19 0  | 3 | DIANE | 40.2 | 75.3 | 40  | 1003 |
| 1955 | 8 19 6  | 3 | DIANE | 40.7 | 73.7 | 40  | 1002 |
| 1955 | 8 19 12 | 3 | DIANE | 41.0 | 72.1 | 35  | 1000 |
| 1955 | 8 19 18 | 3 | DIANE | 41.3 | 70.4 | 35  | 0    |
| 1955 | 8 20 0  | 3 | DIANE | 41.5 | 68.6 | 35  | 0    |
| 1955 | 8 20 6  | 3 | DIANE | 41.8 | 66.6 | 35  | 0    |
| 1955 | 8 20 12 | 3 | DIANE | 42.1 | 64.0 | 35  | 0    |
| 1955 | 8 20 18 | 3 | DIANE | 42.6 | 60.7 | 35  | 0    |
| 1955 | 8 21 0  | 3 | DIANE | 43.3 | 57.0 | 35  | 0    |
| 1955 | 8 21 6  | 3 | DIANE | 44.2 | 53.2 | 35  | 0    |
| 1955 | 8 21 12 | 3 | DIANE | 45.0 | 49.3 | 35  | 0    |
| 1955 | 8 21 18 | 3 | DIANE | 46.2 | 45.9 | 30  | 0    |
| 1955 | 8 21 12 | 4 | EDITH | 12.4 | 41.0 | 25  | 0    |
| 1955 | 8 21 18 | 4 | EDITH | 12.8 | 42.3 | 25  | 0    |
| 1955 | 8 22 0  | 4 | EDITH | 13.2 | 43.5 | 25  | 0    |
| 1955 | 8 22 6  | 4 | EDITH | 13.6 | 44.7 | 25  | 0    |
| 1955 | 8 22 12 | 4 | EDITH | 13.9 | 45.9 | 25  | 0    |
| 1955 | 8 22 18 | 4 | EDITH | 14.2 | 47.0 | 25  | 0    |
| 1955 | 8 23 0  | 4 | EDITH | 14.5 | 48.0 | 25  | 0    |

|      |      |    |   |       |      |      |    |   |
|------|------|----|---|-------|------|------|----|---|
| 1955 | 8 23 | 6  | 4 | EDITH | 15.0 | 49.5 | 30 | 0 |
| 1955 | 8 23 | 12 | 4 | EDITH | 15.3 | 51.0 | 45 | 0 |
| 1955 | 8 23 | 18 | 4 | EDITH | 15.7 | 52.3 | 45 | 0 |
| 1955 | 8 24 | 0  | 4 | EDITH | 16.3 | 53.3 | 60 | 0 |
| 1955 | 8 24 | 6  | 4 | EDITH | 17.2 | 54.0 | 60 | 0 |
| 1955 | 8 24 | 12 | 4 | EDITH | 18.3 | 54.6 | 60 | 0 |
| 1955 | 8 24 | 18 | 4 | EDITH | 19.9 | 55.2 | 60 | 0 |
| 1955 | 8 25 | 0  | 4 | EDITH | 21.3 | 56.3 | 70 | 0 |
| 1955 | 8 25 | 6  | 4 | EDITH | 22.1 | 57.4 | 70 | 0 |
| 1955 | 8 25 | 12 | 4 | EDITH | 22.8 | 58.6 | 70 | 0 |
| 1955 | 8 25 | 18 | 4 | EDITH | 23.4 | 59.6 | 75 | 0 |
| 1955 | 8 26 | 0  | 4 | EDITH | 24.0 | 60.6 | 75 | 0 |
| 1955 | 8 26 | 6  | 4 | EDITH | 24.6 | 61.5 | 75 | 0 |
| 1955 | 8 26 | 12 | 4 | EDITH | 25.2 | 62.3 | 75 | 0 |
| 1955 | 8 26 | 18 | 4 | EDITH | 25.7 | 62.8 | 75 | 0 |
| 1955 | 8 27 | 0  | 4 | EDITH | 26.0 | 63.1 | 80 | 0 |
| 1955 | 8 27 | 6  | 4 | EDITH | 26.3 | 63.4 | 80 | 0 |
| 1955 | 8 27 | 12 | 4 | EDITH | 26.6 | 63.7 | 80 | 0 |
| 1955 | 8 27 | 18 | 4 | EDITH | 26.9 | 63.9 | 80 | 0 |
| 1955 | 8 28 | 0  | 4 | EDITH | 27.3 | 64.0 | 80 | 0 |
| 1955 | 8 28 | 6  | 4 | EDITH | 27.7 | 64.1 | 85 | 0 |
| 1955 | 8 28 | 12 | 4 | EDITH | 28.1 | 64.1 | 85 | 0 |
| 1955 | 8 28 | 18 | 4 | EDITH | 28.5 | 64.0 | 85 | 0 |
| 1955 | 8 29 | 0  | 4 | EDITH | 29.0 | 63.9 | 85 | 0 |
| 1955 | 8 29 | 6  | 4 | EDITH | 29.6 | 63.6 | 85 | 0 |
| 1955 | 8 29 | 12 | 4 | EDITH | 30.5 | 63.1 | 85 | 0 |
| 1955 | 8 29 | 18 | 4 | EDITH | 31.6 | 62.2 | 85 | 0 |
| 1955 | 8 30 | 0  | 4 | EDITH | 32.9 | 61.1 | 85 | 0 |
| 1955 | 8 30 | 6  | 4 | EDITH | 34.9 | 59.4 | 85 | 0 |
| 1955 | 8 30 | 12 | 4 | EDITH | 36.9 | 57.8 | 80 | 0 |
| 1955 | 8 30 | 18 | 4 | EDITH | 38.0 | 56.5 | 75 | 0 |
| 1955 | 8 31 | 0  | 4 | EDITH | 39.0 | 55.3 | 70 | 0 |
| 1955 | 8 31 | 6  | 4 | EDITH | 39.9 | 53.9 | 65 | 0 |
| 1955 | 8 31 | 12 | 4 | EDITH | 40.6 | 52.6 | 65 | 0 |
| 1955 | 8 31 | 18 | 4 | EDITH | 41.0 | 51.1 | 60 | 0 |
| 1955 | 9 1  | 0  | 4 | EDITH | 40.5 | 49.7 | 55 | 0 |
| 1955 | 9 1  | 6  | 4 | EDITH | 40.1 | 49.0 | 50 | 0 |
| 1955 | 9 1  | 12 | 4 | EDITH | 39.5 | 49.1 | 45 | 0 |
| 1955 | 9 1  | 18 | 4 | EDITH | 38.6 | 49.7 | 35 | 0 |
| 1955 | 9 2  | 0  | 4 | EDITH | 37.8 | 50.8 | 35 | 0 |
| 1955 | 9 2  | 6  | 4 | EDITH | 37.1 | 52.5 | 35 | 0 |
| 1955 | 9 2  | 12 | 4 | EDITH | 37.0 | 54.0 | 35 | 0 |
| 1955 | 9 2  | 18 | 4 | EDITH | 37.0 | 54.6 | 35 | 0 |
| 1955 | 9 3  | 0  | 4 | EDITH | 37.0 | 55.1 | 35 | 0 |

|      |   |    |    |   |           |      |      |    |   |
|------|---|----|----|---|-----------|------|------|----|---|
| 1955 | 9 | 3  | 6  | 4 | EDITH     | 37.0 | 55.5 | 35 | 0 |
| 1955 | 9 | 3  | 12 | 4 | EDITH     | 37.0 | 56.0 | 35 | 0 |
| 1955 | 9 | 3  | 18 | 4 | EDITH     | 37.2 | 56.3 | 35 | 0 |
| 1955 | 8 | 23 | 6  | 5 | NOT NAMED | 17.7 | 80.0 | 35 | 0 |
| 1955 | 8 | 23 | 12 | 5 | NOT NAMED | 18.9 | 81.1 | 35 | 0 |
| 1955 | 8 | 23 | 18 | 5 | NOT NAMED | 19.5 | 81.6 | 35 | 0 |
| 1955 | 8 | 24 | 0  | 5 | NOT NAMED | 20.0 | 82.0 | 35 | 0 |
| 1955 | 8 | 24 | 6  | 5 | NOT NAMED | 20.5 | 82.4 | 35 | 0 |
| 1955 | 8 | 24 | 12 | 5 | NOT NAMED | 21.0 | 82.7 | 35 | 0 |
| 1955 | 8 | 24 | 18 | 5 | NOT NAMED | 21.6 | 83.3 | 35 | 0 |
| 1955 | 8 | 25 | 0  | 5 | NOT NAMED | 22.3 | 83.8 | 35 | 0 |
| 1955 | 8 | 25 | 6  | 5 | NOT NAMED | 22.9 | 84.1 | 35 | 0 |
| 1955 | 8 | 25 | 12 | 5 | NOT NAMED | 23.5 | 84.4 | 35 | 0 |
| 1955 | 8 | 25 | 18 | 5 | NOT NAMED | 24.3 | 84.8 | 35 | 0 |
| 1955 | 8 | 26 | 0  | 5 | NOT NAMED | 25.4 | 85.3 | 35 | 0 |
| 1955 | 8 | 26 | 6  | 5 | NOT NAMED | 26.5 | 85.7 | 35 | 0 |
| 1955 | 8 | 26 | 12 | 5 | NOT NAMED | 27.7 | 86.1 | 40 | 0 |
| 1955 | 8 | 26 | 18 | 5 | NOT NAMED | 28.8 | 87.0 | 40 | 0 |
| 1955 | 8 | 27 | 0  | 5 | NOT NAMED | 29.6 | 88.3 | 40 | 0 |
| 1955 | 8 | 27 | 6  | 5 | NOT NAMED | 30.1 | 89.7 | 40 | 0 |
| 1955 | 8 | 27 | 12 | 5 | NOT NAMED | 30.3 | 91.1 | 40 | 0 |
| 1955 | 8 | 27 | 18 | 5 | NOT NAMED | 30.5 | 92.3 | 40 | 0 |
| 1955 | 8 | 28 | 0  | 5 | NOT NAMED | 30.6 | 93.3 | 40 | 0 |
| 1955 | 8 | 28 | 6  | 5 | NOT NAMED | 30.8 | 93.9 | 35 | 0 |
| 1955 | 8 | 28 | 12 | 5 | NOT NAMED | 31.3 | 94.5 | 35 | 0 |
| 1955 | 8 | 28 | 18 | 5 | NOT NAMED | 32.2 | 95.0 | 35 | 0 |
| 1955 | 8 | 29 | 0  | 5 | NOT NAMED | 33.5 | 95.5 | 30 | 0 |
| 1955 | 8 | 29 | 6  | 5 | NOT NAMED | 35.0 | 95.5 | 30 | 0 |
| 1955 | 8 | 29 | 12 | 5 | NOT NAMED | 36.4 | 94.7 | 25 | 0 |
| 1955 | 8 | 29 | 18 | 5 | NOT NAMED | 37.6 | 92.6 | 25 | 0 |
| 1955 | 8 | 30 | 0  | 5 | NOT NAMED | 38.7 | 90.3 | 25 | 0 |
| 1955 | 9 | 2  | 6  | 6 | FLORA     | 19.0 | 31.1 | 35 | 0 |
| 1955 | 9 | 2  | 12 | 6 | FLORA     | 19.2 | 33.1 | 35 | 0 |
| 1955 | 9 | 2  | 18 | 6 | FLORA     | 19.4 | 35.3 | 40 | 0 |
| 1955 | 9 | 3  | 0  | 6 | FLORA     | 19.8 | 37.1 | 45 | 0 |
| 1955 | 9 | 3  | 6  | 6 | FLORA     | 20.4 | 38.7 | 55 | 0 |
| 1955 | 9 | 3  | 12 | 6 | FLORA     | 21.0 | 40.2 | 65 | 0 |
| 1955 | 9 | 3  | 18 | 6 | FLORA     | 21.6 | 41.7 | 65 | 0 |
| 1955 | 9 | 4  | 0  | 6 | FLORA     | 22.2 | 43.2 | 65 | 0 |
| 1955 | 9 | 4  | 6  | 6 | FLORA     | 22.9 | 44.8 | 65 | 0 |
| 1955 | 9 | 4  | 12 | 6 | FLORA     | 23.7 | 46.4 | 65 | 0 |
| 1955 | 9 | 4  | 18 | 6 | FLORA     | 24.6 | 48.1 | 65 | 0 |
| 1955 | 9 | 5  | 0  | 6 | FLORA     | 25.5 | 49.8 | 65 | 0 |
| 1955 | 9 | 5  | 6  | 6 | FLORA     | 26.5 | 51.3 | 65 | 0 |



|      |   |    |    |          |      |      |    |      |
|------|---|----|----|----------|------|------|----|------|
| 1955 | 9 | 5  | 12 | 6 FLORA  | 27.4 | 52.4 | 65 | 0    |
| 1955 | 9 | 5  | 18 | 6 FLORA  | 28.2 | 53.3 | 65 | 0    |
| 1955 | 9 | 6  | 0  | 6 FLORA  | 29.0 | 54.0 | 65 | 0    |
| 1955 | 9 | 6  | 6  | 6 FLORA  | 29.9 | 54.6 | 70 | 0    |
| 1955 | 9 | 6  | 12 | 6 FLORA  | 30.7 | 55.1 | 80 | 0    |
| 1955 | 9 | 6  | 18 | 6 FLORA  | 31.6 | 55.3 | 85 | 967  |
| 1955 | 9 | 7  | 0  | 6 FLORA  | 32.4 | 55.4 | 90 | 0    |
| 1955 | 9 | 7  | 6  | 6 FLORA  | 33.1 | 55.4 | 90 | 0    |
| 1955 | 9 | 7  | 12 | 6 FLORA  | 33.9 | 55.2 | 90 | 0    |
| 1955 | 9 | 7  | 18 | 6 FLORA  | 35.3 | 54.7 | 90 | 0    |
| 1955 | 9 | 8  | 0  | 6 FLORA  | 36.8 | 53.9 | 90 | 0    |
| 1955 | 9 | 8  | 6  | 6 FLORA  | 38.0 | 52.7 | 90 | 0    |
| 1955 | 9 | 8  | 12 | 6 FLORA  | 39.3 | 51.2 | 90 | 0    |
| 1955 | 9 | 8  | 18 | 6 FLORA  | 40.7 | 49.7 | 90 | 972  |
| 1955 | 9 | 9  | 0  | 6 FLORA  | 42.4 | 47.2 | 85 | 0    |
| 1955 | 9 | 9  | 6  | 6 FLORA  | 44.5 | 43.7 | 80 | 0    |
| 1955 | 9 | 9  | 12 | 6 FLORA  | 46.6 | 40.1 | 70 | 0    |
| 1955 | 9 | 4  | 12 | 7 GLADYS | 20.6 | 94.1 | 30 | 0    |
| 1955 | 9 | 4  | 18 | 7 GLADYS | 21.5 | 94.6 | 35 | 0    |
| 1955 | 9 | 5  | 0  | 7 GLADYS | 22.3 | 95.2 | 40 | 0    |
| 1955 | 9 | 5  | 6  | 7 GLADYS | 23.1 | 95.9 | 60 | 0    |
| 1955 | 9 | 5  | 12 | 7 GLADYS | 23.6 | 96.7 | 80 | 0    |
| 1955 | 9 | 5  | 18 | 7 GLADYS | 23.4 | 97.3 | 75 | 0    |
| 1955 | 9 | 6  | 0  | 7 GLADYS | 22.8 | 97.7 | 50 | 0    |
| 1955 | 9 | 6  | 6  | 7 GLADYS | 22.1 | 97.8 | 45 | 0    |
| 1955 | 9 | 6  | 12 | 7 GLADYS | 21.5 | 97.8 | 40 | 0    |
| 1955 | 9 | 6  | 18 | 7 GLADYS | 20.7 | 97.8 | 40 | 0    |
| 1955 | 9 | 10 | 18 | 8 HILDA  | 16.8 | 61.3 | 30 | 0    |
| 1955 | 9 | 11 | 0  | 8 HILDA  | 17.4 | 61.7 | 30 | 0    |
| 1955 | 9 | 11 | 6  | 8 HILDA  | 18.0 | 62.3 | 30 | 0    |
| 1955 | 9 | 11 | 12 | 8 HILDA  | 18.6 | 62.9 | 35 | 0    |
| 1955 | 9 | 11 | 18 | 8 HILDA  | 18.9 | 64.1 | 40 | 0    |
| 1955 | 9 | 12 | 0  | 8 HILDA  | 19.2 | 65.6 | 45 | 0    |
| 1955 | 9 | 12 | 6  | 8 HILDA  | 19.5 | 66.8 | 50 | 0    |
| 1955 | 9 | 12 | 12 | 8 HILDA  | 19.8 | 68.0 | 65 | 1007 |
| 1955 | 9 | 12 | 18 | 8 HILDA  | 20.1 | 69.1 | 75 | 0    |
| 1955 | 9 | 13 | 0  | 8 HILDA  | 20.4 | 70.2 | 80 | 0    |
| 1955 | 9 | 13 | 6  | 8 HILDA  | 20.4 | 71.3 | 85 | 0    |
| 1955 | 9 | 13 | 12 | 8 HILDA  | 20.3 | 72.5 | 85 | 0    |
| 1955 | 9 | 13 | 18 | 8 HILDA  | 20.2 | 73.6 | 70 | 0    |
| 1955 | 9 | 14 | 0  | 8 HILDA  | 20.1 | 74.7 | 65 | 0    |
| 1955 | 9 | 14 | 6  | 8 HILDA  | 20.1 | 76.2 | 60 | 0    |
| 1955 | 9 | 14 | 12 | 8 HILDA  | 20.1 | 77.7 | 60 | 0    |
| 1955 | 9 | 14 | 18 | 8 HILDA  | 19.9 | 79.2 | 65 | 0    |

|      |      |    |         |      |      |     |      |
|------|------|----|---------|------|------|-----|------|
| 1955 | 9 15 | 0  | 8 HILDA | 19.6 | 80.6 | 75  | 0    |
| 1955 | 9 15 | 6  | 8 HILDA | 19.4 | 82.1 | 85  | 0    |
| 1955 | 9 15 | 12 | 8 HILDA | 19.2 | 83.4 | 90  | 980  |
| 1955 | 9 15 | 18 | 8 HILDA | 19.1 | 84.4 | 100 | 0    |
| 1955 | 9 16 | 0  | 8 HILDA | 19.2 | 85.4 | 100 | 963  |
| 1955 | 9 16 | 6  | 8 HILDA | 19.4 | 86.4 | 95  | 0    |
| 1955 | 9 16 | 12 | 8 HILDA | 19.6 | 87.4 | 95  | 0    |
| 1955 | 9 16 | 18 | 8 HILDA | 19.9 | 88.4 | 90  | 0    |
| 1955 | 9 17 | 0  | 8 HILDA | 20.2 | 89.3 | 85  | 0    |
| 1955 | 9 17 | 6  | 8 HILDA | 20.6 | 90.2 | 85  | 0    |
| 1955 | 9 17 | 12 | 8 HILDA | 20.9 | 91.0 | 90  | 0    |
| 1955 | 9 17 | 18 | 8 HILDA | 21.1 | 92.0 | 90  | 0    |
| 1955 | 9 18 | 0  | 8 HILDA | 21.3 | 92.9 | 95  | 0    |
| 1955 | 9 18 | 6  | 8 HILDA | 21.4 | 93.6 | 100 | 0    |
| 1955 | 9 18 | 12 | 8 HILDA | 21.6 | 94.2 | 105 | 0    |
| 1955 | 9 18 | 18 | 8 HILDA | 21.8 | 95.0 | 110 | 0    |
| 1955 | 9 19 | 0  | 8 HILDA | 22.0 | 95.9 | 105 | 0    |
| 1955 | 9 19 | 6  | 8 HILDA | 22.2 | 97.0 | 85  | 0    |
| 1955 | 9 19 | 12 | 8 HILDA | 22.3 | 98.1 | 60  | 952  |
| 1955 | 9 19 | 18 | 8 HILDA | 22.2 | 98.8 | 45  | 0    |
| 1955 | 9 10 | 6  | 9 IONE  | 15.4 | 43.2 | 25  | 0    |
| 1955 | 9 10 | 12 | 9 IONE  | 15.4 | 44.2 | 35  | 0    |
| 1955 | 9 10 | 18 | 9 IONE  | 15.4 | 45.4 | 35  | 0    |
| 1955 | 9 11 | 0  | 9 IONE  | 15.3 | 46.7 | 35  | 0    |
| 1955 | 9 11 | 6  | 9 IONE  | 15.3 | 48.0 | 35  | 0    |
| 1955 | 9 11 | 12 | 9 IONE  | 15.2 | 49.3 | 35  | 0    |
| 1955 | 9 11 | 18 | 9 IONE  | 14.9 | 50.5 | 35  | 0    |
| 1955 | 9 12 | 0  | 9 IONE  | 14.7 | 51.7 | 35  | 0    |
| 1955 | 9 12 | 6  | 9 IONE  | 14.4 | 52.9 | 35  | 0    |
| 1955 | 9 12 | 12 | 9 IONE  | 14.2 | 54.1 | 35  | 0    |
| 1955 | 9 12 | 18 | 9 IONE  | 14.4 | 55.3 | 40  | 1008 |
| 1955 | 9 13 | 0  | 9 IONE  | 15.0 | 56.5 | 40  | 0    |
| 1955 | 9 13 | 6  | 9 IONE  | 15.7 | 57.5 | 40  | 0    |
| 1955 | 9 13 | 12 | 9 IONE  | 16.4 | 58.2 | 45  | 0    |
| 1955 | 9 13 | 18 | 9 IONE  | 16.9 | 58.8 | 45  | 0    |
| 1955 | 9 14 | 0  | 9 IONE  | 17.4 | 59.3 | 50  | 0    |
| 1955 | 9 14 | 6  | 9 IONE  | 17.7 | 59.7 | 55  | 0    |
| 1955 | 9 14 | 12 | 9 IONE  | 18.0 | 60.2 | 60  | 0    |
| 1955 | 9 14 | 18 | 9 IONE  | 18.5 | 61.2 | 60  | 0    |
| 1955 | 9 15 | 0  | 9 IONE  | 19.3 | 62.3 | 65  | 0    |
| 1955 | 9 15 | 6  | 9 IONE  | 20.7 | 62.8 | 65  | 0    |
| 1955 | 9 15 | 12 | 9 IONE  | 22.1 | 63.3 | 70  | 990  |
| 1955 | 9 15 | 18 | 9 IONE  | 22.9 | 65.2 | 70  | 0    |
| 1955 | 9 16 | 0  | 9 IONE  | 23.4 | 67.1 | 75  | 0    |

|      |      |       |        |      |      |     |     |
|------|------|-------|--------|------|------|-----|-----|
| 1955 | 9 16 | 6     | 9 IONE | 23.8 | 68.1 | 75  | 0   |
| 1955 | 9 16 | 12    | 9 IONE | 24.2 | 69.1 | 80  | 990 |
| 1955 | 9 16 | 18    | 9 IONE | 24.7 | 70.4 | 85  | 0   |
| 1955 | 9 17 | 0     | 9 IONE | 25.2 | 71.4 | 90  | 0   |
| 1955 | 9 17 | 6     | 9 IONE | 25.8 | 72.0 | 95  | 0   |
| 1955 | 9 17 | 12    | 9 IONE | 26.5 | 72.7 | 100 | 950 |
| 1955 | 9 17 | 18    | 9 IONE | 27.3 | 73.3 | 100 | 938 |
| 1955 | 9 18 | 0     | 9 IONE | 28.1 | 74.0 | 100 | 0   |
| 1955 | 9 18 | 6     | 9 IONE | 28.9 | 74.7 | 105 | 0   |
| 1955 | 9 18 | 12    | 9 IONE | 29.8 | 75.3 | 100 | 940 |
| 1955 | 9 18 | 18    | 9 IONE | 31.2 | 75.8 | 100 | 0   |
| 1955 | 9 19 | 0     | 9 IONE | 32.8 | 76.2 | 100 | 0   |
| 1955 | 9 19 | 6     | 9 IONE | 33.9 | 76.6 | 90  | 0   |
| 1955 | 9 19 | 12    | 9 IONE | 34.8 | 76.7 | 65  | 960 |
| 1955 | 9 19 | 18    | 9 IONE | 35.6 | 76.5 | 60  | 0   |
| 1955 | 9 20 | 0     | 9 IONE | 36.4 | 75.4 | 60  | 0   |
| 1955 | 9 20 | 6     | 9 IONE | 36.7 | 74.5 | 65  | 0   |
| 1955 | 9 20 | 12    | 9 IONE | 37.0 | 73.4 | 90  | 0   |
| 1955 | 9 20 | 18    | 9 IONE | 37.8 | 71.1 | 85  | 982 |
| 1955 | 9 21 | 0     | 9 IONE | 39.4 | 67.8 | 75  | 0   |
| 1955 | 9 21 | 6     | 9 IONE | 42.3 | 62.5 | 60  | 0   |
| 1955 | 9 21 | 12    | 9 IONE | 45.0 | 59.4 | 50  | 0   |
| 1955 | 9 21 | 18    | 9 IONE | 46.7 | 57.4 | 45  | 0   |
| 1955 | 9 22 | 0     | 9 IONE | 48.4 | 55.8 | 45  | 0   |
| 1955 | 9 22 | 6     | 9 IONE | 50.1 | 54.7 | 45  | 0   |
| 1955 | 9 22 | 12    | 9 IONE | 51.8 | 53.0 | 45  | 0   |
| 1955 | 9 22 | 18    | 9 IONE | 53.1 | 49.9 | 45  | 0   |
| 1955 | 9 23 | 0     | 9 IONE | 53.4 | 46.8 | 45  | 0   |
| 1955 | 9 23 | 6     | 9 IONE | 53.3 | 43.7 | 45  | 0   |
| 1955 | 9 23 | 12    | 9 IONE | 53.1 | 40.6 | 45  | 0   |
| 1955 | 9 23 | 18    | 9 IONE | 54.6 | 35.0 | 45  | 0   |
| 1955 | 9 24 | 0     | 9 IONE | 57.2 | 29.3 | 45  | 0   |
| 1955 | 9 21 | 18 10 | JANET  | 13.2 | 54.3 | 35  | 0   |
| 1955 | 9 22 | 0 10  | JANET  | 13.3 | 56.0 | 50  | 0   |
| 1955 | 9 22 | 6 10  | JANET  | 13.1 | 57.6 | 50  | 0   |
| 1955 | 9 22 | 12 10 | JANET  | 12.9 | 59.2 | 105 | 0   |
| 1955 | 9 22 | 18 10 | JANET  | 12.5 | 60.4 | 105 | 979 |
| 1955 | 9 23 | 0 10  | JANET  | 12.3 | 61.4 | 100 | 0   |
| 1955 | 9 23 | 6 10  | JANET  | 12.5 | 62.5 | 85  | 0   |
| 1955 | 9 23 | 12 10 | JANET  | 12.7 | 63.6 | 80  | 996 |
| 1955 | 9 23 | 18 10 | JANET  | 12.9 | 64.8 | 80  | 996 |
| 1955 | 9 24 | 0 10  | JANET  | 13.0 | 66.0 | 85  | 0   |
| 1955 | 9 24 | 6 10  | JANET  | 13.5 | 66.9 | 95  | 0   |
| 1955 | 9 24 | 12 10 | JANET  | 14.0 | 67.9 | 100 | 996 |

|      |    |    |    |    |           |      |      |     |     |
|------|----|----|----|----|-----------|------|------|-----|-----|
| 1955 | 9  | 24 | 18 | 10 | JANET     | 13.9 | 69.3 | 110 | 995 |
| 1955 | 9  | 25 | 0  | 10 | JANET     | 13.7 | 70.7 | 115 | 0   |
| 1955 | 9  | 25 | 6  | 10 | JANET     | 13.8 | 71.8 | 115 | 0   |
| 1955 | 9  | 25 | 12 | 10 | JANET     | 13.9 | 72.9 | 115 | 993 |
| 1955 | 9  | 25 | 18 | 10 | JANET     | 14.3 | 74.3 | 115 | 988 |
| 1955 | 9  | 26 | 0  | 10 | JANET     | 14.7 | 75.5 | 120 | 0   |
| 1955 | 9  | 26 | 6  | 10 | JANET     | 14.8 | 76.3 | 120 | 0   |
| 1955 | 9  | 26 | 12 | 10 | JANET     | 15.0 | 77.1 | 125 | 970 |
| 1955 | 9  | 26 | 18 | 10 | JANET     | 15.4 | 78.0 | 125 | 0   |
| 1955 | 9  | 27 | 0  | 10 | JANET     | 15.9 | 78.9 | 130 | 0   |
| 1955 | 9  | 27 | 6  | 10 | JANET     | 16.5 | 80.2 | 135 | 914 |
| 1955 | 9  | 27 | 12 | 10 | JANET     | 17.0 | 82.0 | 140 | 938 |
| 1955 | 9  | 27 | 18 | 10 | JANET     | 17.5 | 84.1 | 145 | 0   |
| 1955 | 9  | 28 | 0  | 10 | JANET     | 18.0 | 86.1 | 150 | 0   |
| 1955 | 9  | 28 | 6  | 10 | JANET     | 18.5 | 88.2 | 130 | 0   |
| 1955 | 9  | 28 | 12 | 10 | JANET     | 19.0 | 90.2 | 95  | 950 |
| 1955 | 9  | 28 | 18 | 10 | JANET     | 19.3 | 91.9 | 90  | 0   |
| 1955 | 9  | 29 | 0  | 10 | JANET     | 19.5 | 93.1 | 90  | 0   |
| 1955 | 9  | 29 | 6  | 10 | JANET     | 19.7 | 94.2 | 95  | 0   |
| 1955 | 9  | 29 | 12 | 10 | JANET     | 19.9 | 95.3 | 95  | 950 |
| 1955 | 9  | 29 | 18 | 10 | JANET     | 20.0 | 96.3 | 85  | 0   |
| 1955 | 9  | 30 | 0  | 10 | JANET     | 20.0 | 97.7 | 60  | 0   |
| 1955 | 9  | 30 | 6  | 10 | JANET     | 20.3 | 98.8 | 50  | 0   |
| 1955 | 10 | 10 | 6  | 11 | NOT NAMED | 28.4 | 41.4 | 30  | 0   |
| 1955 | 10 | 10 | 12 | 11 | NOT NAMED | 28.4 | 42.0 | 45  | 0   |
| 1955 | 10 | 10 | 18 | 11 | NOT NAMED | 28.4 | 42.7 | 45  | 0   |
| 1955 | 10 | 11 | 0  | 11 | NOT NAMED | 28.4 | 43.3 | 45  | 0   |
| 1955 | 10 | 11 | 6  | 11 | NOT NAMED | 28.6 | 43.8 | 55  | 0   |
| 1955 | 10 | 11 | 12 | 11 | NOT NAMED | 28.8 | 44.2 | 50  | 0   |
| 1955 | 10 | 11 | 18 | 11 | NOT NAMED | 29.1 | 44.4 | 50  | 0   |
| 1955 | 10 | 12 | 0  | 11 | NOT NAMED | 29.4 | 44.4 | 50  | 0   |
| 1955 | 10 | 12 | 6  | 11 | NOT NAMED | 29.7 | 44.4 | 50  | 0   |
| 1955 | 10 | 12 | 12 | 11 | NOT NAMED | 30.0 | 44.2 | 50  | 0   |
| 1955 | 10 | 12 | 18 | 11 | NOT NAMED | 30.6 | 43.5 | 50  | 0   |
| 1955 | 10 | 13 | 0  | 11 | NOT NAMED | 31.2 | 42.6 | 50  | 0   |
| 1955 | 10 | 13 | 6  | 11 | NOT NAMED | 31.8 | 41.6 | 50  | 0   |
| 1955 | 10 | 13 | 12 | 11 | NOT NAMED | 32.4 | 40.5 | 50  | 0   |
| 1955 | 10 | 13 | 18 | 11 | NOT NAMED | 33.7 | 39.4 | 50  | 0   |
| 1955 | 10 | 14 | 0  | 11 | NOT NAMED | 35.8 | 38.0 | 50  | 0   |
| 1955 | 10 | 14 | 6  | 11 | NOT NAMED | 37.8 | 36.6 | 45  | 0   |
| 1955 | 10 | 14 | 12 | 11 | NOT NAMED | 40.0 | 35.1 | 40  | 0   |
| 1955 | 10 | 14 | 18 | 12 | KATIE     | 11.7 | 77.9 | 30  | 0   |
| 1955 | 10 | 15 | 0  | 12 | KATIE     | 12.1 | 77.7 | 35  | 0   |
| 1955 | 10 | 15 | 6  | 12 | KATIE     | 12.6 | 77.2 | 45  | 0   |

|                          |      |      |     |      |
|--------------------------|------|------|-----|------|
| 1955 10 15 12 12 KATIE   | 13.2 | 76.7 | 50  | 0    |
| 1955 10 15 18 12 KATIE   | 13.8 | 76.1 | 60  | 0    |
| 1955 10 16 0 12 KATIE    | 14.3 | 75.3 | 70  | 0    |
| 1955 10 16 6 12 KATIE    | 14.8 | 74.5 | 80  | 0    |
| 1955 10 16 12 12 KATIE   | 15.3 | 73.7 | 90  | 0    |
| 1955 10 16 18 12 KATIE   | 16.1 | 72.9 | 100 | 984  |
| 1955 10 17 0 12 KATIE    | 17.1 | 72.2 | 100 | 0    |
| 1955 10 17 6 12 KATIE    | 18.1 | 71.8 | 55  | 0    |
| 1955 10 17 12 12 KATIE   | 19.3 | 71.3 | 50  | 0    |
| 1955 10 17 18 12 KATIE   | 20.7 | 70.5 | 60  | 0    |
| 1955 10 18 0 12 KATIE    | 22.1 | 69.8 | 60  | 0    |
| 1955 10 18 6 12 KATIE    | 23.3 | 69.0 | 60  | 0    |
| 1955 10 18 12 12 KATIE   | 24.7 | 68.3 | 60  | 0    |
| 1955 10 18 18 12 KATIE   | 26.9 | 67.1 | 50  | 0    |
| 1955 10 19 0 12 KATIE    | 29.5 | 65.4 | 40  | 0    |
| 1955 10 19 6 12 KATIE    | 32.0 | 63.3 | 40  | 0    |
| 1955 10 19 12 12 KATIE   | 34.5 | 60.5 | 35  | 0    |
| 1955 10 19 18 12 KATIE   | 37.1 | 56.9 | 35  | 0    |
| 1955 10 20 0 12 KATIE    | 39.7 | 52.4 | 35  | 0    |
| 1955 10 20 6 12 KATIE    | 41.9 | 47.1 | 35  | 0    |
| 1956 6 12 0 1 NOT NAMED  | 22.0 | 91.5 | 25  | 0    |
| 1956 6 12 6 1 NOT NAMED  | 22.5 | 91.3 | 30  | 0    |
| 1956 6 12 12 1 NOT NAMED | 23.1 | 91.2 | 30  | 1009 |
| 1956 6 12 18 1 NOT NAMED | 24.0 | 91.0 | 35  | 0    |
| 1956 6 13 0 1 NOT NAMED  | 25.3 | 90.7 | 40  | 0    |
| 1956 6 13 6 1 NOT NAMED  | 26.4 | 90.7 | 50  | 0    |
| 1956 6 13 12 1 NOT NAMED | 27.5 | 90.9 | 50  | 1004 |
| 1956 6 13 18 1 NOT NAMED | 29.0 | 90.8 | 45  | 0    |
| 1956 6 14 0 1 NOT NAMED  | 30.6 | 90.5 | 40  | 0    |
| 1956 6 14 6 1 NOT NAMED  | 32.2 | 91.0 | 35  | 0    |
| 1956 6 14 12 1 NOT NAMED | 33.8 | 91.7 | 25  | 1006 |
| 1956 6 14 18 1 NOT NAMED | 34.7 | 92.8 | 25  | 0    |
| 1956 6 15 0 1 NOT NAMED  | 34.9 | 93.3 | 25  | 0    |
| 1956 6 15 6 1 NOT NAMED  | 35.2 | 93.8 | 20  | 0    |
| 1956 7 25 18 2 ANNA      | 20.6 | 92.7 | 30  | 0    |
| 1956 7 26 0 2 ANNA       | 20.8 | 93.5 | 35  | 1006 |
| 1956 7 26 6 2 ANNA       | 21.0 | 94.5 | 45  | 0    |
| 1956 7 26 12 2 ANNA      | 21.2 | 95.5 | 50  | 991  |
| 1956 7 26 18 2 ANNA      | 21.5 | 96.7 | 65  | 0    |
| 1956 7 27 0 2 ANNA       | 21.9 | 98.4 | 70  | 1002 |
| 1956 7 27 6 2 ANNA       | 22.0 | 98.9 | 60  | 0    |
| 1956 8 9 6 3 BETSY       | 13.5 | 47.2 | 50  | 0    |
| 1956 8 9 12 3 BETSY      | 13.7 | 48.8 | 50  | 0    |
| 1956 8 9 18 3 BETSY      | 13.9 | 50.2 | 50  | 0    |

|      |      |    |         |      |      |     |     |
|------|------|----|---------|------|------|-----|-----|
| 1956 | 8 10 | 0  | 3 BETSY | 14.0 | 51.6 | 60  | 0   |
| 1956 | 8 10 | 6  | 3 BETSY | 14.1 | 53.0 | 105 | 0   |
| 1956 | 8 10 | 12 | 3 BETSY | 14.2 | 54.3 | 105 | 0   |
| 1956 | 8 10 | 18 | 3 BETSY | 14.4 | 56.0 | 105 | 979 |
| 1956 | 8 11 | 0  | 3 BETSY | 14.7 | 57.8 | 105 | 0   |
| 1956 | 8 11 | 6  | 3 BETSY | 14.9 | 59.1 | 100 | 0   |
| 1956 | 8 11 | 12 | 3 BETSY | 15.3 | 60.3 | 95  | 0   |
| 1956 | 8 11 | 18 | 3 BETSY | 16.0 | 61.8 | 80  | 991 |
| 1956 | 8 12 | 0  | 3 BETSY | 16.5 | 63.2 | 80  | 0   |
| 1956 | 8 12 | 6  | 3 BETSY | 17.0 | 64.4 | 80  | 0   |
| 1956 | 8 12 | 12 | 3 BETSY | 17.8 | 65.7 | 80  | 0   |
| 1956 | 8 12 | 18 | 3 BETSY | 18.8 | 67.2 | 80  | 0   |
| 1956 | 8 13 | 0  | 3 BETSY | 19.8 | 68.7 | 85  | 0   |
| 1956 | 8 13 | 6  | 3 BETSY | 20.9 | 70.0 | 95  | 0   |
| 1956 | 8 13 | 12 | 3 BETSY | 21.9 | 71.3 | 95  | 974 |
| 1956 | 8 13 | 18 | 3 BETSY | 22.8 | 72.5 | 95  | 0   |
| 1956 | 8 14 | 0  | 3 BETSY | 23.7 | 73.6 | 95  | 0   |
| 1956 | 8 14 | 6  | 3 BETSY | 24.6 | 74.8 | 95  | 0   |
| 1956 | 8 14 | 12 | 3 BETSY | 25.6 | 76.0 | 95  | 0   |
| 1956 | 8 14 | 18 | 3 BETSY | 26.5 | 76.7 | 95  | 0   |
| 1956 | 8 15 | 0  | 3 BETSY | 27.2 | 76.8 | 90  | 968 |
| 1956 | 8 15 | 6  | 3 BETSY | 27.8 | 76.8 | 85  | 0   |
| 1956 | 8 15 | 12 | 3 BETSY | 28.3 | 76.6 | 85  | 963 |
| 1956 | 8 15 | 18 | 3 BETSY | 28.8 | 76.1 | 85  | 0   |
| 1956 | 8 16 | 0  | 3 BETSY | 29.3 | 75.6 | 85  | 0   |
| 1956 | 8 16 | 6  | 3 BETSY | 29.8 | 75.0 | 85  | 0   |
| 1956 | 8 16 | 12 | 3 BETSY | 30.7 | 74.3 | 85  | 0   |
| 1956 | 8 16 | 18 | 3 BETSY | 32.2 | 73.3 | 85  | 0   |
| 1956 | 8 17 | 0  | 3 BETSY | 33.7 | 72.2 | 80  | 954 |
| 1956 | 8 17 | 6  | 3 BETSY | 35.1 | 70.9 | 75  | 0   |
| 1956 | 8 17 | 12 | 3 BETSY | 36.6 | 69.6 | 70  | 0   |
| 1956 | 8 17 | 18 | 3 BETSY | 38.0 | 68.1 | 70  | 0   |
| 1956 | 8 18 | 0  | 3 BETSY | 39.5 | 66.4 | 65  | 0   |
| 1956 | 8 18 | 6  | 3 BETSY | 40.8 | 64.7 | 50  | 0   |
| 1956 | 8 18 | 12 | 3 BETSY | 41.7 | 62.1 | 50  | 0   |
| 1956 | 8 18 | 18 | 3 BETSY | 42.4 | 58.6 | 50  | 0   |
| 1956 | 8 19 | 0  | 3 BETSY | 42.8 | 55.0 | 50  | 0   |
| 1956 | 8 19 | 6  | 3 BETSY | 43.1 | 51.7 | 45  | 0   |
| 1956 | 8 19 | 12 | 3 BETSY | 43.2 | 48.6 | 45  | 0   |
| 1956 | 8 19 | 18 | 3 BETSY | 43.1 | 45.1 | 45  | 0   |
| 1956 | 8 20 | 0  | 3 BETSY | 43.1 | 41.6 | 40  | 0   |
| 1956 | 9 5  | 6  | 4 CARLA | 21.0 | 74.8 | 30  | 0   |
| 1956 | 9 5  | 12 | 4 CARLA | 21.5 | 74.9 | 35  | 0   |
| 1956 | 9 5  | 18 | 4 CARLA | 22.0 | 75.1 | 35  | 0   |

|      |   |    |    |   |       |      |      |    |      |
|------|---|----|----|---|-------|------|------|----|------|
| 1956 | 9 | 6  | 0  | 4 | CARLA | 22.5 | 75.3 | 35 | 0    |
| 1956 | 9 | 6  | 6  | 4 | CARLA | 23.1 | 75.4 | 35 | 0    |
| 1956 | 9 | 6  | 12 | 4 | CARLA | 23.7 | 75.4 | 35 | 0    |
| 1956 | 9 | 6  | 18 | 4 | CARLA | 24.2 | 75.4 | 35 | 0    |
| 1956 | 9 | 7  | 0  | 4 | CARLA | 24.8 | 75.3 | 35 | 0    |
| 1956 | 9 | 7  | 6  | 4 | CARLA | 25.4 | 75.0 | 35 | 0    |
| 1956 | 9 | 7  | 12 | 4 | CARLA | 26.0 | 74.8 | 35 | 0    |
| 1956 | 9 | 7  | 18 | 4 | CARLA | 26.6 | 74.5 | 40 | 0    |
| 1956 | 9 | 8  | 0  | 4 | CARLA | 27.3 | 74.3 | 45 | 0    |
| 1956 | 9 | 8  | 6  | 4 | CARLA | 28.1 | 73.9 | 45 | 0    |
| 1956 | 9 | 8  | 12 | 4 | CARLA | 29.0 | 73.3 | 45 | 0    |
| 1956 | 9 | 8  | 18 | 4 | CARLA | 29.9 | 72.6 | 45 | 0    |
| 1956 | 9 | 9  | 0  | 4 | CARLA | 30.8 | 71.9 | 40 | 0    |
| 1956 | 9 | 9  | 6  | 4 | CARLA | 31.6 | 71.0 | 35 | 0    |
| 1956 | 9 | 9  | 12 | 4 | CARLA | 32.3 | 70.0 | 35 | 0    |
| 1956 | 9 | 9  | 18 | 4 | CARLA | 33.0 | 68.8 | 35 | 0    |
| 1956 | 9 | 10 | 0  | 4 | CARLA | 33.8 | 67.0 | 35 | 998  |
| 1956 | 9 | 10 | 6  | 4 | CARLA | 34.7 | 64.2 | 35 | 0    |
| 1956 | 9 | 10 | 12 | 4 | CARLA | 36.0 | 61.2 | 35 | 996  |
| 1956 | 9 | 10 | 18 | 4 | CARLA | 37.7 | 58.7 | 35 | 0    |
| 1956 | 9 | 11 | 0  | 4 | CARLA | 39.7 | 56.1 | 30 | 0    |
| 1956 | 9 | 11 | 6  | 4 | CARLA | 41.8 | 53.0 | 25 | 0    |
| 1956 | 9 | 11 | 12 | 4 | CARLA | 44.0 | 50.0 | 25 | 0    |
| 1956 | 9 | 10 | 6  | 5 | DORA  | 20.5 | 91.1 | 35 | 0    |
| 1956 | 9 | 10 | 12 | 5 | DORA  | 20.8 | 92.1 | 45 | 0    |
| 1956 | 9 | 10 | 18 | 5 | DORA  | 21.1 | 93.0 | 50 | 0    |
| 1956 | 9 | 11 | 0  | 5 | DORA  | 21.3 | 93.8 | 55 | 0    |
| 1956 | 9 | 11 | 6  | 5 | DORA  | 21.5 | 94.4 | 55 | 0    |
| 1956 | 9 | 11 | 12 | 5 | DORA  | 21.6 | 95.0 | 60 | 1001 |
| 1956 | 9 | 11 | 18 | 5 | DORA  | 21.5 | 95.5 | 60 | 1004 |
| 1956 | 9 | 12 | 0  | 5 | DORA  | 21.4 | 96.0 | 60 | 1004 |
| 1956 | 9 | 12 | 6  | 5 | DORA  | 21.3 | 96.4 | 60 | 0    |
| 1956 | 9 | 12 | 12 | 5 | DORA  | 21.1 | 96.8 | 50 | 1004 |
| 1956 | 9 | 12 | 18 | 5 | DORA  | 20.8 | 97.4 | 30 | 1002 |
| 1956 | 9 | 11 | 18 | 6 | ETHEL | 22.9 | 75.0 | 25 | 0    |
| 1956 | 9 | 12 | 0  | 6 | ETHEL | 23.7 | 75.0 | 30 | 0    |
| 1956 | 9 | 12 | 6  | 6 | ETHEL | 24.5 | 74.7 | 30 | 0    |
| 1956 | 9 | 12 | 12 | 6 | ETHEL | 25.4 | 74.3 | 40 | 0    |
| 1956 | 9 | 12 | 18 | 6 | ETHEL | 26.4 | 73.6 | 60 | 0    |
| 1956 | 9 | 13 | 0  | 6 | ETHEL | 27.3 | 72.7 | 60 | 999  |
| 1956 | 9 | 13 | 6  | 6 | ETHEL | 27.8 | 72.3 | 55 | 0    |
| 1956 | 9 | 13 | 12 | 6 | ETHEL | 28.3 | 71.8 | 50 | 1007 |
| 1956 | 9 | 13 | 18 | 6 | ETHEL | 28.9 | 71.1 | 40 | 0    |
| 1956 | 9 | 14 | 0  | 6 | ETHEL | 29.6 | 70.0 | 35 | 0    |

|      |       |    |          |      |      |    |      |
|------|-------|----|----------|------|------|----|------|
| 1956 | 9 21  | 6  | 7 FLOSSY | 17.4 | 87.5 | 25 | 0    |
| 1956 | 9 21  | 12 | 7 FLOSSY | 18.0 | 88.0 | 25 | 0    |
| 1956 | 9 21  | 18 | 7 FLOSSY | 18.9 | 88.4 | 25 | 0    |
| 1956 | 9 22  | 0  | 7 FLOSSY | 19.9 | 88.9 | 25 | 0    |
| 1956 | 9 22  | 6  | 7 FLOSSY | 21.1 | 89.3 | 30 | 0    |
| 1956 | 9 22  | 12 | 7 FLOSSY | 22.2 | 89.8 | 35 | 0    |
| 1956 | 9 22  | 18 | 7 FLOSSY | 23.1 | 90.2 | 40 | 0    |
| 1956 | 9 23  | 0  | 7 FLOSSY | 24.0 | 90.6 | 50 | 1007 |
| 1956 | 9 23  | 6  | 7 FLOSSY | 24.9 | 90.9 | 55 | 0    |
| 1956 | 9 23  | 12 | 7 FLOSSY | 25.7 | 91.0 | 60 | 0    |
| 1956 | 9 23  | 18 | 7 FLOSSY | 26.9 | 91.0 | 65 | 0    |
| 1956 | 9 24  | 0  | 7 FLOSSY | 28.1 | 90.6 | 70 | 0    |
| 1956 | 9 24  | 6  | 7 FLOSSY | 28.9 | 89.8 | 75 | 983  |
| 1956 | 9 24  | 12 | 7 FLOSSY | 29.5 | 88.7 | 80 | 0    |
| 1956 | 9 24  | 18 | 7 FLOSSY | 30.0 | 87.5 | 80 | 0    |
| 1956 | 9 25  | 0  | 7 FLOSSY | 30.4 | 86.4 | 65 | 980  |
| 1956 | 9 25  | 6  | 7 FLOSSY | 30.7 | 85.6 | 45 | 0    |
| 1956 | 9 25  | 12 | 7 FLOSSY | 31.2 | 84.4 | 40 | 0    |
| 1956 | 9 25  | 18 | 7 FLOSSY | 32.0 | 83.0 | 35 | 0    |
| 1956 | 9 26  | 0  | 7 FLOSSY | 32.8 | 81.6 | 35 | 0    |
| 1956 | 9 26  | 6  | 7 FLOSSY | 33.6 | 80.1 | 35 | 0    |
| 1956 | 9 26  | 12 | 7 FLOSSY | 34.4 | 78.9 | 30 | 0    |
| 1956 | 9 26  | 18 | 7 FLOSSY | 34.8 | 78.4 | 30 | 0    |
| 1956 | 9 27  | 0  | 7 FLOSSY | 35.0 | 78.0 | 30 | 0    |
| 1956 | 9 27  | 6  | 7 FLOSSY | 35.1 | 77.6 | 30 | 0    |
| 1956 | 9 27  | 12 | 7 FLOSSY | 35.3 | 77.2 | 35 | 0    |
| 1956 | 9 27  | 18 | 7 FLOSSY | 35.8 | 76.5 | 35 | 0    |
| 1956 | 9 28  | 0  | 7 FLOSSY | 36.7 | 75.2 | 35 | 0    |
| 1956 | 9 28  | 6  | 7 FLOSSY | 38.2 | 72.5 | 40 | 0    |
| 1956 | 9 28  | 12 | 7 FLOSSY | 39.6 | 69.6 | 40 | 0    |
| 1956 | 9 28  | 18 | 7 FLOSSY | 40.1 | 68.1 | 40 | 0    |
| 1956 | 9 29  | 0  | 7 FLOSSY | 40.1 | 66.7 | 40 | 0    |
| 1956 | 9 29  | 6  | 7 FLOSSY | 39.9 | 64.5 | 40 | 0    |
| 1956 | 9 29  | 12 | 7 FLOSSY | 39.7 | 62.7 | 40 | 0    |
| 1956 | 9 29  | 18 | 7 FLOSSY | 39.2 | 61.8 | 40 | 0    |
| 1956 | 9 30  | 0  | 7 FLOSSY | 38.9 | 60.9 | 40 | 0    |
| 1956 | 9 30  | 6  | 7 FLOSSY | 38.8 | 60.0 | 40 | 0    |
| 1956 | 9 30  | 12 | 7 FLOSSY | 38.7 | 59.1 | 35 | 0    |
| 1956 | 9 30  | 18 | 7 FLOSSY | 38.9 | 58.2 | 35 | 0    |
| 1956 | 10 30 | 6  | 8 GRETA  | 17.8 | 75.5 | 25 | 0    |
| 1956 | 10 30 | 12 | 8 GRETA  | 17.2 | 75.3 | 25 | 0    |
| 1956 | 10 30 | 18 | 8 GRETA  | 17.5 | 75.1 | 25 | 0    |
| 1956 | 10 31 | 0  | 8 GRETA  | 18.2 | 74.9 | 25 | 0    |
| 1956 | 10 31 | 6  | 8 GRETA  | 19.2 | 74.7 | 25 | 0    |



|               |             |      |      |     |     |
|---------------|-------------|------|------|-----|-----|
| 1956 10 31 12 | 8 GRETA     | 20.4 | 74.5 | 25  | 0   |
| 1956 10 31 18 | 8 GRETA     | 21.7 | 74.4 | 25  | 0   |
| 1956 11 1 0   | 8 GRETA     | 23.1 | 74.3 | 30  | 0   |
| 1956 11 1 6   | 8 GRETA     | 24.5 | 73.5 | 30  | 0   |
| 1956 11 1 12  | 8 GRETA     | 25.9 | 72.5 | 30  | 0   |
| 1956 11 1 18  | 8 GRETA     | 27.6 | 72.2 | 30  | 0   |
| 1956 11 2 0   | 8 GRETA     | 29.0 | 72.3 | 30  | 992 |
| 1956 11 2 6   | 8 GRETA     | 29.4 | 73.7 | 30  | 0   |
| 1956 11 2 12  | 8 GRETA     | 28.1 | 73.5 | 35  | 0   |
| 1956 11 2 18  | 8 GRETA     | 27.3 | 72.9 | 35  | 0   |
| 1956 11 3 0   | 8 GRETA     | 26.5 | 72.3 | 40  | 0   |
| 1956 11 3 6   | 8 GRETA     | 25.8 | 72.1 | 45  | 0   |
| 1956 11 3 12  | 8 GRETA     | 25.2 | 71.8 | 55  | 982 |
| 1956 11 3 18  | 8 GRETA     | 24.6 | 71.4 | 55  | 0   |
| 1956 11 4 0   | 8 GRETA     | 24.0 | 70.7 | 60  | 0   |
| 1956 11 4 6   | 8 GRETA     | 23.3 | 69.6 | 65  | 0   |
| 1956 11 4 12  | 8 GRETA     | 22.6 | 68.3 | 75  | 0   |
| 1956 11 4 18  | 8 GRETA     | 21.9 | 66.9 | 95  | 970 |
| 1956 11 5 0   | 8 GRETA     | 22.2 | 65.3 | 110 | 0   |
| 1956 11 5 6   | 8 GRETA     | 23.7 | 63.2 | 115 | 0   |
| 1956 11 5 12  | 8 GRETA     | 25.3 | 61.0 | 120 | 970 |
| 1956 11 5 18  | 8 GRETA     | 26.8 | 59.1 | 120 | 0   |
| 1956 11 6 0   | 8 GRETA     | 28.3 | 57.1 | 110 | 0   |
| 1956 11 6 6   | 8 GRETA     | 29.5 | 54.5 | 100 | 0   |
| 1956 11 6 12  | 8 GRETA     | 30.6 | 51.2 | 85  | 985 |
| 1956 11 6 18  | 8 GRETA     | 31.9 | 47.6 | 70  | 0   |
| 1956 11 7 0   | 8 GRETA     | 33.3 | 42.6 | 55  | 0   |
| 1956 11 7 6   | 8 GRETA     | 34.5 | 37.7 | 45  | 0   |
| 1957 6 8 6    | 1 NOT NAMED | 25.5 | 88.5 | 20  | 0   |
| 1957 6 8 12   | 1 NOT NAMED | 26.2 | 87.8 | 35  | 0   |
| 1957 6 8 18   | 1 NOT NAMED | 28.2 | 86.2 | 35  | 0   |
| 1957 6 9 0    | 1 NOT NAMED | 30.0 | 84.3 | 35  | 0   |
| 1957 6 9 6    | 1 NOT NAMED | 31.6 | 82.3 | 35  | 0   |
| 1957 6 9 12   | 1 NOT NAMED | 32.6 | 80.2 | 35  | 0   |
| 1957 6 9 18   | 1 NOT NAMED | 33.0 | 78.2 | 45  | 0   |
| 1957 6 10 0   | 1 NOT NAMED | 33.1 | 76.1 | 55  | 0   |
| 1957 6 10 6   | 1 NOT NAMED | 33.2 | 74.2 | 60  | 0   |
| 1957 6 10 12  | 1 NOT NAMED | 33.0 | 72.6 | 60  | 0   |
| 1957 6 10 18  | 1 NOT NAMED | 32.5 | 71.4 | 60  | 0   |
| 1957 6 11 0   | 1 NOT NAMED | 32.0 | 70.3 | 55  | 0   |
| 1957 6 11 6   | 1 NOT NAMED | 31.5 | 68.7 | 55  | 0   |
| 1957 6 11 12  | 1 NOT NAMED | 31.0 | 67.3 | 50  | 0   |
| 1957 6 11 18  | 1 NOT NAMED | 30.9 | 66.6 | 45  | 0   |
| 1957 6 12 0   | 1 NOT NAMED | 31.1 | 66.1 | 45  | 0   |

|      |   |    |    |   |           |      |      |     |      |
|------|---|----|----|---|-----------|------|------|-----|------|
| 1957 | 6 | 12 | 6  | 1 | NOT NAMED | 31.7 | 65.6 | 40  | 0    |
| 1957 | 6 | 12 | 12 | 1 | NOT NAMED | 32.2 | 65.2 | 35  | 0    |
| 1957 | 6 | 12 | 18 | 1 | NOT NAMED | 33.0 | 65.8 | 35  | 0    |
| 1957 | 6 | 13 | 0  | 1 | NOT NAMED | 32.2 | 66.1 | 35  | 0    |
| 1957 | 6 | 13 | 6  | 1 | NOT NAMED | 32.1 | 64.9 | 35  | 0    |
| 1957 | 6 | 13 | 12 | 1 | NOT NAMED | 32.1 | 63.6 | 35  | 0    |
| 1957 | 6 | 13 | 18 | 1 | NOT NAMED | 32.7 | 62.4 | 35  | 0    |
| 1957 | 6 | 14 | 0  | 1 | NOT NAMED | 33.4 | 61.3 | 35  | 0    |
| 1957 | 6 | 14 | 6  | 1 | NOT NAMED | 34.0 | 60.4 | 35  | 0    |
| 1957 | 6 | 14 | 12 | 1 | NOT NAMED | 34.6 | 59.6 | 35  | 0    |
| 1957 | 6 | 14 | 18 | 1 | NOT NAMED | 35.6 | 58.4 | 35  | 0    |
| 1957 | 6 | 15 | 0  | 1 | NOT NAMED | 37.0 | 57.1 | 35  | 0    |
| 1957 | 6 | 15 | 6  | 1 | NOT NAMED | 38.7 | 56.4 | 35  | 0    |
| 1957 | 6 | 25 | 6  | 2 | AUDREY    | 21.6 | 93.3 | 60  | 0    |
| 1957 | 6 | 25 | 12 | 2 | AUDREY    | 22.0 | 93.4 | 85  | 989  |
| 1957 | 6 | 25 | 18 | 2 | AUDREY    | 22.6 | 93.5 | 75  | 979  |
| 1957 | 6 | 26 | 0  | 2 | AUDREY    | 23.2 | 93.6 | 75  | 979  |
| 1957 | 6 | 26 | 6  | 2 | AUDREY    | 23.9 | 93.7 | 80  | 0    |
| 1957 | 6 | 26 | 12 | 2 | AUDREY    | 24.7 | 93.7 | 80  | 973  |
| 1957 | 6 | 26 | 18 | 2 | AUDREY    | 25.5 | 93.8 | 85  | 0    |
| 1957 | 6 | 27 | 0  | 2 | AUDREY    | 26.5 | 93.8 | 95  | 0    |
| 1957 | 6 | 27 | 6  | 2 | AUDREY    | 27.9 | 93.8 | 115 | 0    |
| 1957 | 6 | 27 | 12 | 2 | AUDREY    | 29.3 | 93.8 | 125 | 946  |
| 1957 | 6 | 27 | 18 | 2 | AUDREY    | 30.7 | 93.5 | 60  | 0    |
| 1957 | 6 | 28 | 0  | 2 | AUDREY    | 32.0 | 92.8 | 45  | 972  |
| 1957 | 6 | 28 | 6  | 2 | AUDREY    | 33.3 | 91.6 | 40  | 0    |
| 1957 | 6 | 28 | 12 | 2 | AUDREY    | 34.5 | 89.5 | 35  | 0    |
| 1957 | 6 | 28 | 18 | 2 | AUDREY    | 36.5 | 86.1 | 30  | 0    |
| 1957 | 6 | 29 | 0  | 2 | AUDREY    | 39.4 | 80.9 | 40  | 0    |
| 1957 | 6 | 29 | 6  | 2 | AUDREY    | 43.7 | 77.1 | 50  | 0    |
| 1957 | 8 | 8  | 18 | 3 | BERTHA    | 27.0 | 88.9 | 35  | 0    |
| 1957 | 8 | 9  | 0  | 3 | BERTHA    | 27.4 | 89.5 | 40  | 1000 |
| 1957 | 8 | 9  | 6  | 3 | BERTHA    | 27.9 | 90.4 | 60  | 0    |
| 1957 | 8 | 9  | 12 | 3 | BERTHA    | 28.3 | 91.3 | 60  | 998  |
| 1957 | 8 | 9  | 18 | 3 | BERTHA    | 29.0 | 92.3 | 60  | 0    |
| 1957 | 8 | 10 | 0  | 3 | BERTHA    | 29.7 | 93.3 | 60  | 0    |
| 1957 | 8 | 10 | 6  | 3 | BERTHA    | 30.2 | 94.1 | 45  | 0    |
| 1957 | 8 | 10 | 12 | 3 | BERTHA    | 30.6 | 94.8 | 30  | 0    |
| 1957 | 8 | 10 | 18 | 3 | BERTHA    | 31.1 | 95.1 | 25  | 0    |
| 1957 | 8 | 11 | 0  | 3 | BERTHA    | 31.8 | 95.2 | 25  | 0    |
| 1957 | 8 | 11 | 6  | 3 | BERTHA    | 32.7 | 95.2 | 25  | 0    |
| 1957 | 8 | 11 | 12 | 3 | BERTHA    | 33.6 | 95.2 | 25  | 0    |
| 1957 | 8 | 11 | 18 | 3 | BERTHA    | 34.7 | 95.2 | 25  | 0    |
| 1957 | 9 | 2  | 6  | 4 | CARRIE    | 13.0 | 21.7 | 25  | 0    |

|      |   |    |    |   |        |      |      |     |      |
|------|---|----|----|---|--------|------|------|-----|------|
| 1957 | 9 | 2  | 12 | 4 | CARRIE | 13.0 | 22.2 | 25  | 0    |
| 1957 | 9 | 2  | 18 | 4 | CARRIE | 13.0 | 23.1 | 25  | 1001 |
| 1957 | 9 | 3  | 0  | 4 | CARRIE | 13.1 | 24.0 | 25  | 0    |
| 1957 | 9 | 3  | 6  | 4 | CARRIE | 13.4 | 25.0 | 30  | 0    |
| 1957 | 9 | 3  | 12 | 4 | CARRIE | 13.7 | 25.9 | 35  | 0    |
| 1957 | 9 | 3  | 18 | 4 | CARRIE | 13.9 | 26.8 | 35  | 0    |
| 1957 | 9 | 4  | 0  | 4 | CARRIE | 14.1 | 27.7 | 40  | 0    |
| 1957 | 9 | 4  | 6  | 4 | CARRIE | 14.3 | 28.6 | 45  | 0    |
| 1957 | 9 | 4  | 12 | 4 | CARRIE | 14.5 | 29.6 | 50  | 0    |
| 1957 | 9 | 4  | 18 | 4 | CARRIE | 14.5 | 30.6 | 55  | 0    |
| 1957 | 9 | 5  | 0  | 4 | CARRIE | 14.4 | 31.5 | 60  | 0    |
| 1957 | 9 | 5  | 6  | 4 | CARRIE | 14.5 | 32.6 | 65  | 0    |
| 1957 | 9 | 5  | 12 | 4 | CARRIE | 14.7 | 33.7 | 70  | 0    |
| 1957 | 9 | 5  | 18 | 4 | CARRIE | 14.9 | 34.6 | 75  | 0    |
| 1957 | 9 | 6  | 0  | 4 | CARRIE | 15.2 | 35.4 | 80  | 0    |
| 1957 | 9 | 6  | 6  | 4 | CARRIE | 15.4 | 36.5 | 80  | 0    |
| 1957 | 9 | 6  | 12 | 4 | CARRIE | 15.7 | 37.5 | 85  | 0    |
| 1957 | 9 | 6  | 18 | 4 | CARRIE | 15.9 | 38.3 | 95  | 0    |
| 1957 | 9 | 7  | 0  | 4 | CARRIE | 16.2 | 39.1 | 100 | 0    |
| 1957 | 9 | 7  | 6  | 4 | CARRIE | 16.4 | 40.0 | 105 | 0    |
| 1957 | 9 | 7  | 12 | 4 | CARRIE | 16.7 | 41.0 | 110 | 945  |
| 1957 | 9 | 7  | 18 | 4 | CARRIE | 17.0 | 42.0 | 115 | 0    |
| 1957 | 9 | 8  | 0  | 4 | CARRIE | 17.4 | 42.9 | 120 | 0    |
| 1957 | 9 | 8  | 6  | 4 | CARRIE | 17.7 | 43.9 | 125 | 0    |
| 1957 | 9 | 8  | 12 | 4 | CARRIE | 18.0 | 45.0 | 130 | 945  |
| 1957 | 9 | 8  | 18 | 4 | CARRIE | 18.0 | 45.7 | 135 | 0    |
| 1957 | 9 | 9  | 0  | 4 | CARRIE | 18.0 | 46.5 | 135 | 0    |
| 1957 | 9 | 9  | 6  | 4 | CARRIE | 18.1 | 47.3 | 135 | 0    |
| 1957 | 9 | 9  | 12 | 4 | CARRIE | 18.3 | 48.2 | 135 | 975  |
| 1957 | 9 | 9  | 18 | 4 | CARRIE | 18.6 | 49.0 | 130 | 0    |
| 1957 | 9 | 10 | 0  | 4 | CARRIE | 19.0 | 49.7 | 125 | 0    |
| 1957 | 9 | 10 | 6  | 4 | CARRIE | 19.2 | 50.5 | 115 | 0    |
| 1957 | 9 | 10 | 12 | 4 | CARRIE | 19.5 | 51.3 | 95  | 987  |
| 1957 | 9 | 10 | 18 | 4 | CARRIE | 19.9 | 52.0 | 85  | 0    |
| 1957 | 9 | 11 | 0  | 4 | CARRIE | 20.4 | 52.5 | 75  | 0    |
| 1957 | 9 | 11 | 6  | 4 | CARRIE | 20.7 | 52.7 | 65  | 0    |
| 1957 | 9 | 11 | 12 | 4 | CARRIE | 21.0 | 52.7 | 65  | 984  |
| 1957 | 9 | 11 | 18 | 4 | CARRIE | 21.5 | 52.7 | 70  | 0    |
| 1957 | 9 | 12 | 0  | 4 | CARRIE | 21.9 | 52.7 | 80  | 0    |
| 1957 | 9 | 12 | 6  | 4 | CARRIE | 22.4 | 52.7 | 85  | 0    |
| 1957 | 9 | 12 | 12 | 4 | CARRIE | 22.8 | 52.7 | 90  | 957  |
| 1957 | 9 | 12 | 18 | 4 | CARRIE | 23.3 | 52.7 | 95  | 0    |
| 1957 | 9 | 13 | 0  | 4 | CARRIE | 24.0 | 52.6 | 95  | 0    |
| 1957 | 9 | 13 | 6  | 4 | CARRIE | 24.7 | 52.5 | 95  | 0    |

|      |         |          |      |      |     |     |
|------|---------|----------|------|------|-----|-----|
| 1957 | 9 13 12 | 4 CARRIE | 25.4 | 52.4 | 100 | 963 |
| 1957 | 9 13 18 | 4 CARRIE | 26.2 | 52.4 | 100 | 0   |
| 1957 | 9 14 0  | 4 CARRIE | 27.0 | 52.5 | 100 | 0   |
| 1957 | 9 14 6  | 4 CARRIE | 27.6 | 52.7 | 105 | 0   |
| 1957 | 9 14 12 | 4 CARRIE | 28.1 | 53.2 | 110 | 963 |
| 1957 | 9 14 18 | 4 CARRIE | 28.4 | 54.1 | 115 | 0   |
| 1957 | 9 15 0  | 4 CARRIE | 28.8 | 55.3 | 120 | 0   |
| 1957 | 9 15 6  | 4 CARRIE | 29.5 | 56.7 | 110 | 0   |
| 1957 | 9 15 12 | 4 CARRIE | 30.2 | 58.0 | 105 | 963 |
| 1957 | 9 15 18 | 4 CARRIE | 31.0 | 58.9 | 100 | 0   |
| 1957 | 9 16 0  | 4 CARRIE | 31.7 | 59.7 | 90  | 0   |
| 1957 | 9 16 6  | 4 CARRIE | 32.2 | 60.8 | 85  | 0   |
| 1957 | 9 16 12 | 4 CARRIE | 32.7 | 62.0 | 85  | 964 |
| 1957 | 9 16 18 | 4 CARRIE | 33.5 | 62.9 | 85  | 0   |
| 1957 | 9 17 0  | 4 CARRIE | 34.2 | 63.6 | 80  | 0   |
| 1957 | 9 17 6  | 4 CARRIE | 34.7 | 64.1 | 80  | 0   |
| 1957 | 9 17 12 | 4 CARRIE | 35.2 | 63.8 | 80  | 972 |
| 1957 | 9 17 18 | 4 CARRIE | 35.7 | 62.9 | 80  | 0   |
| 1957 | 9 18 0  | 4 CARRIE | 36.1 | 61.8 | 80  | 0   |
| 1957 | 9 18 6  | 4 CARRIE | 36.2 | 60.7 | 75  | 0   |
| 1957 | 9 18 12 | 4 CARRIE | 35.9 | 59.5 | 75  | 978 |
| 1957 | 9 18 18 | 4 CARRIE | 35.5 | 58.0 | 75  | 0   |
| 1957 | 9 19 0  | 4 CARRIE | 35.2 | 56.4 | 75  | 0   |
| 1957 | 9 19 6  | 4 CARRIE | 34.9 | 55.2 | 70  | 0   |
| 1957 | 9 19 12 | 4 CARRIE | 34.7 | 53.9 | 70  | 970 |
| 1957 | 9 19 18 | 4 CARRIE | 34.5 | 52.2 | 70  | 0   |
| 1957 | 9 20 0  | 4 CARRIE | 34.4 | 50.4 | 70  | 0   |
| 1957 | 9 20 6  | 4 CARRIE | 34.3 | 49.2 | 70  | 0   |
| 1957 | 9 20 12 | 4 CARRIE | 34.1 | 47.8 | 70  | 0   |
| 1957 | 9 20 18 | 4 CARRIE | 34.2 | 45.9 | 70  | 0   |
| 1957 | 9 21 0  | 4 CARRIE | 34.5 | 44.0 | 70  | 0   |
| 1957 | 9 21 6  | 4 CARRIE | 34.6 | 42.1 | 70  | 0   |
| 1957 | 9 21 12 | 4 CARRIE | 34.7 | 40.1 | 70  | 972 |
| 1957 | 9 21 18 | 4 CARRIE | 35.0 | 38.0 | 70  | 0   |
| 1957 | 9 22 0  | 4 CARRIE | 35.7 | 35.6 | 70  | 0   |
| 1957 | 9 22 6  | 4 CARRIE | 36.8 | 32.8 | 70  | 0   |
| 1957 | 9 22 12 | 4 CARRIE | 38.4 | 29.5 | 70  | 0   |
| 1957 | 9 22 18 | 4 CARRIE | 40.4 | 25.3 | 65  | 0   |
| 1957 | 9 23 0  | 4 CARRIE | 42.3 | 21.9 | 65  | 0   |
| 1957 | 9 23 6  | 4 CARRIE | 44.0 | 19.9 | 65  | 0   |
| 1957 | 9 23 12 | 4 CARRIE | 45.6 | 17.8 | 60  | 0   |
| 1957 | 9 23 18 | 4 CARRIE | 47.5 | 15.6 | 60  | 0   |
| 1957 | 9 24 0  | 4 CARRIE | 48.9 | 13.7 | 55  | 0   |
| 1957 | 9 24 6  | 4 CARRIE | 50.0 | 12.0 | 55  | 0   |

|      |         |          |      |      |    |      |
|------|---------|----------|------|------|----|------|
| 1957 | 9 24 12 | 4 CARRIE | 51.2 | 10.8 | 50 | 0    |
| 1957 | 9 24 18 | 4 CARRIE | 52.2 | 9.4  | 45 | 0    |
| 1957 | 9 7 6   | 5 DEBBIE | 23.9 | 89.8 | 35 | 0    |
| 1957 | 9 7 12  | 5 DEBBIE | 25.0 | 89.5 | 35 | 0    |
| 1957 | 9 7 18  | 5 DEBBIE | 26.2 | 88.8 | 35 | 0    |
| 1957 | 9 8 0   | 5 DEBBIE | 27.4 | 88.1 | 35 | 0    |
| 1957 | 9 8 6   | 5 DEBBIE | 28.7 | 87.4 | 35 | 0    |
| 1957 | 9 8 12  | 5 DEBBIE | 30.0 | 86.8 | 35 | 0    |
| 1957 | 9 8 18  | 5 DEBBIE | 30.7 | 86.0 | 35 | 0    |
| 1957 | 9 9 0   | 5 DEBBIE | 31.9 | 85.1 | 30 | 0    |
| 1957 | 9 9 6   | 5 DEBBIE | 32.5 | 84.4 | 30 | 0    |
| 1957 | 9 16 18 | 6 ESTHER | 23.0 | 92.8 | 30 | 0    |
| 1957 | 9 17 0  | 6 ESTHER | 23.7 | 92.8 | 35 | 1000 |
| 1957 | 9 17 6  | 6 ESTHER | 24.5 | 92.7 | 45 | 0    |
| 1957 | 9 17 12 | 6 ESTHER | 25.3 | 92.6 | 45 | 1004 |
| 1957 | 9 17 18 | 6 ESTHER | 26.3 | 92.3 | 45 | 0    |
| 1957 | 9 18 0  | 6 ESTHER | 27.3 | 91.8 | 45 | 0    |
| 1957 | 9 18 6  | 6 ESTHER | 28.2 | 91.3 | 45 | 0    |
| 1957 | 9 18 12 | 6 ESTHER | 29.2 | 90.9 | 45 | 1005 |
| 1957 | 9 18 18 | 6 ESTHER | 30.4 | 90.5 | 45 | 0    |
| 1957 | 9 19 0  | 6 ESTHER | 31.5 | 90.5 | 35 | 0    |
| 1957 | 9 19 6  | 6 ESTHER | 32.5 | 90.5 | 25 | 0    |
| 1957 | 9 19 12 | 6 ESTHER | 33.5 | 91.0 | 25 | 0    |
| 1957 | 9 20 12 | 7 FRIEDA | 31.7 | 65.8 | 25 | 0    |
| 1957 | 9 20 18 | 7 FRIEDA | 30.8 | 65.6 | 25 | 0    |
| 1957 | 9 21 0  | 7 FRIEDA | 30.0 | 65.6 | 25 | 0    |
| 1957 | 9 21 6  | 7 FRIEDA | 29.2 | 65.8 | 30 | 0    |
| 1957 | 9 21 12 | 7 FRIEDA | 28.6 | 66.0 | 30 | 1001 |
| 1957 | 9 21 18 | 7 FRIEDA | 28.2 | 66.2 | 30 | 0    |
| 1957 | 9 22 0  | 7 FRIEDA | 27.8 | 66.5 | 35 | 0    |
| 1957 | 9 22 6  | 7 FRIEDA | 27.5 | 67.6 | 50 | 0    |
| 1957 | 9 22 12 | 7 FRIEDA | 27.2 | 69.1 | 50 | 1007 |
| 1957 | 9 22 18 | 7 FRIEDA | 27.1 | 70.3 | 50 | 0    |
| 1957 | 9 23 0  | 7 FRIEDA | 27.1 | 71.2 | 50 | 0    |
| 1957 | 9 23 6  | 7 FRIEDA | 27.2 | 71.7 | 45 | 0    |
| 1957 | 9 23 12 | 7 FRIEDA | 27.8 | 72.0 | 45 | 1001 |
| 1957 | 9 23 18 | 7 FRIEDA | 28.8 | 72.2 | 45 | 0    |
| 1957 | 9 24 0  | 7 FRIEDA | 29.8 | 72.3 | 45 | 0    |
| 1957 | 9 24 6  | 7 FRIEDA | 30.8 | 72.0 | 45 | 0    |
| 1957 | 9 24 12 | 7 FRIEDA | 31.8 | 71.3 | 45 | 1001 |
| 1957 | 9 24 18 | 7 FRIEDA | 32.8 | 70.3 | 45 | 0    |
| 1957 | 9 25 0  | 7 FRIEDA | 33.8 | 68.8 | 50 | 0    |
| 1957 | 9 25 6  | 7 FRIEDA | 35.0 | 67.0 | 60 | 0    |
| 1957 | 9 25 12 | 7 FRIEDA | 36.4 | 65.2 | 70 | 992  |

|      |          |             |      |       |    |      |
|------|----------|-------------|------|-------|----|------|
| 1957 | 9 25 18  | 7 FRIEDA    | 37.7 | 63.4  | 70 | 0    |
| 1957 | 9 26 0   | 7 FRIEDA    | 39.0 | 61.6  | 70 | 0    |
| 1957 | 9 26 6   | 7 FRIEDA    | 40.2 | 59.7  | 65 | 0    |
| 1957 | 9 26 12  | 7 FRIEDA    | 41.4 | 57.8  | 55 | 0    |
| 1957 | 9 26 18  | 7 FRIEDA    | 42.5 | 56.2  | 50 | 0    |
| 1957 | 9 27 0   | 7 FRIEDA    | 44.0 | 54.5  | 45 | 0    |
| 1957 | 9 27 6   | 7 FRIEDA    | 46.3 | 52.8  | 35 | 0    |
| 1957 | 9 27 12  | 7 FRIEDA    | 48.5 | 51.2  | 35 | 0    |
| 1957 | 10 23 0  | 8 NOT NAMED | 21.9 | 58.0  | 25 | 0    |
| 1957 | 10 23 6  | 8 NOT NAMED | 23.3 | 59.3  | 25 | 0    |
| 1957 | 10 23 12 | 8 NOT NAMED | 24.7 | 60.7  | 35 | 999  |
| 1957 | 10 23 18 | 8 NOT NAMED | 25.0 | 62.2  | 35 | 0    |
| 1957 | 10 24 0  | 8 NOT NAMED | 24.7 | 63.8  | 35 | 999  |
| 1957 | 10 24 6  | 8 NOT NAMED | 24.9 | 65.0  | 40 | 993  |
| 1957 | 10 24 12 | 8 NOT NAMED | 25.4 | 65.8  | 45 | 0    |
| 1957 | 10 24 18 | 8 NOT NAMED | 26.6 | 66.0  | 50 | 0    |
| 1957 | 10 25 0  | 8 NOT NAMED | 27.8 | 65.8  | 40 | 993  |
| 1957 | 10 25 6  | 8 NOT NAMED | 28.8 | 65.4  | 35 | 0    |
| 1957 | 10 25 12 | 8 NOT NAMED | 29.8 | 64.8  | 35 | 993  |
| 1957 | 10 25 18 | 8 NOT NAMED | 30.7 | 64.1  | 35 | 0    |
| 1957 | 10 26 0  | 8 NOT NAMED | 31.7 | 62.9  | 35 | 0    |
| 1957 | 10 26 6  | 8 NOT NAMED | 33.1 | 61.2  | 35 | 0    |
| 1957 | 10 26 12 | 8 NOT NAMED | 34.6 | 59.3  | 35 | 0    |
| 1957 | 10 26 18 | 8 NOT NAMED | 36.0 | 57.6  | 35 | 0    |
| 1957 | 10 27 0  | 8 NOT NAMED | 37.0 | 55.3  | 30 | 0    |
| 1957 | 10 27 6  | 8 NOT NAMED | 37.6 | 51.9  | 25 | 0    |
| 1957 | 10 27 12 | 8 NOT NAMED | 38.3 | 48.5  | 25 | 0    |
| 1957 | 10 27 18 | 8 NOT NAMED | 38.8 | 44.6  | 25 | 0    |
| 1958 | 6 14 6   | 1 ALMA      | 21.1 | 94.5  | 30 | 0    |
| 1958 | 6 14 12  | 1 ALMA      | 21.7 | 95.0  | 40 | 0    |
| 1958 | 6 14 18  | 1 ALMA      | 22.5 | 95.6  | 45 | 0    |
| 1958 | 6 15 0   | 1 ALMA      | 23.5 | 96.4  | 40 | 997  |
| 1958 | 6 15 6   | 1 ALMA      | 24.5 | 97.3  | 35 | 1006 |
| 1958 | 6 15 12  | 1 ALMA      | 25.6 | 98.1  | 35 | 0    |
| 1958 | 6 15 18  | 1 ALMA      | 26.7 | 99.0  | 30 | 0    |
| 1958 | 6 16 0   | 1 ALMA      | 27.9 | 100.1 | 25 | 0    |
| 1958 | 6 16 6   | 1 ALMA      | 29.1 | 101.0 | 20 | 0    |
| 1958 | 6 16 12  | 1 ALMA      | 30.3 | 101.7 | 15 | 0    |
| 1958 | 6 16 18  | 1 ALMA      | 31.4 | 102.5 | 15 | 0    |
| 1958 | 8 8 12   | 2 BECKY     | 15.3 | 21.0  | 25 | 0    |
| 1958 | 8 8 18   | 2 BECKY     | 15.6 | 23.5  | 25 | 0    |
| 1958 | 8 9 0    | 2 BECKY     | 15.9 | 25.5  | 25 | 0    |
| 1958 | 8 9 6    | 2 BECKY     | 16.1 | 27.1  | 25 | 0    |
| 1958 | 8 9 12   | 2 BECKY     | 16.2 | 28.7  | 25 | 0    |

|      |   |    |    |   |       |      |      |    |   |
|------|---|----|----|---|-------|------|------|----|---|
| 1958 | 8 | 9  | 18 | 2 | BECKY | 16.6 | 30.5 | 25 | 0 |
| 1958 | 8 | 10 | 0  | 2 | BECKY | 16.9 | 32.2 | 25 | 0 |
| 1958 | 8 | 10 | 6  | 2 | BECKY | 17.0 | 33.9 | 25 | 0 |
| 1958 | 8 | 10 | 12 | 2 | BECKY | 17.0 | 35.5 | 25 | 0 |
| 1958 | 8 | 10 | 18 | 2 | BECKY | 17.1 | 36.8 | 25 | 0 |
| 1958 | 8 | 11 | 0  | 2 | BECKY | 17.2 | 38.2 | 25 | 0 |
| 1958 | 8 | 11 | 6  | 2 | BECKY | 17.4 | 40.0 | 30 | 0 |
| 1958 | 8 | 11 | 12 | 2 | BECKY | 17.7 | 41.8 | 35 | 0 |
| 1958 | 8 | 11 | 18 | 2 | BECKY | 17.9 | 43.4 | 35 | 0 |
| 1958 | 8 | 12 | 0  | 2 | BECKY | 18.1 | 45.1 | 40 | 0 |
| 1958 | 8 | 12 | 6  | 2 | BECKY | 18.5 | 47.5 | 45 | 0 |
| 1958 | 8 | 12 | 12 | 2 | BECKY | 18.9 | 50.0 | 50 | 0 |
| 1958 | 8 | 12 | 18 | 2 | BECKY | 18.9 | 52.4 | 50 | 0 |
| 1958 | 8 | 13 | 0  | 2 | BECKY | 18.8 | 54.6 | 50 | 0 |
| 1958 | 8 | 13 | 6  | 2 | BECKY | 19.1 | 56.3 | 50 | 0 |
| 1958 | 8 | 13 | 12 | 2 | BECKY | 19.5 | 57.9 | 50 | 0 |
| 1958 | 8 | 13 | 18 | 2 | BECKY | 20.1 | 59.8 | 50 | 0 |
| 1958 | 8 | 14 | 0  | 2 | BECKY | 20.9 | 61.9 | 50 | 0 |
| 1958 | 8 | 14 | 6  | 2 | BECKY | 21.9 | 64.6 | 50 | 0 |
| 1958 | 8 | 14 | 12 | 2 | BECKY | 23.0 | 67.2 | 50 | 0 |
| 1958 | 8 | 14 | 18 | 2 | BECKY | 23.9 | 69.1 | 50 | 0 |
| 1958 | 8 | 15 | 0  | 2 | BECKY | 24.9 | 70.8 | 40 | 0 |
| 1958 | 8 | 15 | 6  | 2 | BECKY | 26.9 | 72.6 | 35 | 0 |
| 1958 | 8 | 15 | 12 | 2 | BECKY | 29.0 | 73.9 | 35 | 0 |
| 1958 | 8 | 15 | 18 | 2 | BECKY | 30.1 | 73.8 | 35 | 0 |
| 1958 | 8 | 16 | 0  | 2 | BECKY | 31.2 | 73.4 | 30 | 0 |
| 1958 | 8 | 16 | 6  | 2 | BECKY | 32.2 | 73.4 | 25 | 0 |
| 1958 | 8 | 16 | 12 | 2 | BECKY | 33.3 | 73.4 | 25 | 0 |
| 1958 | 8 | 16 | 18 | 2 | BECKY | 34.8 | 72.3 | 25 | 0 |
| 1958 | 8 | 17 | 0  | 2 | BECKY | 36.9 | 69.6 | 25 | 0 |
| 1958 | 8 | 17 | 6  | 2 | BECKY | 39.2 | 66.9 | 25 | 0 |
| 1958 | 8 | 17 | 12 | 2 | BECKY | 41.5 | 62.8 | 25 | 0 |
| 1958 | 8 | 17 | 18 | 2 | BECKY | 43.2 | 57.8 | 25 | 0 |
| 1958 | 8 | 11 | 6  | 3 | CLEO  | 10.8 | 21.6 | 35 | 0 |
| 1958 | 8 | 11 | 12 | 3 | CLEO  | 11.0 | 23.8 | 35 | 0 |
| 1958 | 8 | 11 | 18 | 3 | CLEO  | 11.0 | 26.0 | 35 | 0 |
| 1958 | 8 | 12 | 0  | 3 | CLEO  | 11.1 | 28.0 | 40 | 0 |
| 1958 | 8 | 12 | 6  | 3 | CLEO  | 11.2 | 29.9 | 45 | 0 |
| 1958 | 8 | 12 | 12 | 3 | CLEO  | 11.4 | 31.8 | 45 | 0 |
| 1958 | 8 | 12 | 18 | 3 | CLEO  | 11.7 | 33.8 | 50 | 0 |
| 1958 | 8 | 13 | 0  | 3 | CLEO  | 12.0 | 35.8 | 65 | 0 |
| 1958 | 8 | 13 | 6  | 3 | CLEO  | 12.3 | 37.8 | 80 | 0 |
| 1958 | 8 | 13 | 12 | 3 | CLEO  | 12.5 | 39.6 | 85 | 0 |
| 1958 | 8 | 13 | 18 | 3 | CLEO  | 12.8 | 41.2 | 85 | 0 |

|      |      |    |         |      |      |     |      |
|------|------|----|---------|------|------|-----|------|
| 1958 | 8 14 | 0  | 3 CLEO  | 13.0 | 42.7 | 90  | 0    |
| 1958 | 8 14 | 6  | 3 CLEO  | 13.3 | 44.2 | 100 | 0    |
| 1958 | 8 14 | 12 | 3 CLEO  | 13.8 | 45.7 | 115 | 0    |
| 1958 | 8 14 | 18 | 3 CLEO  | 14.4 | 47.1 | 120 | 962  |
| 1958 | 8 15 | 0  | 3 CLEO  | 15.1 | 48.3 | 125 | 962  |
| 1958 | 8 15 | 6  | 3 CLEO  | 15.8 | 49.0 | 125 | 962  |
| 1958 | 8 15 | 12 | 3 CLEO  | 16.7 | 49.3 | 130 | 960  |
| 1958 | 8 15 | 18 | 3 CLEO  | 18.1 | 49.5 | 135 | 952  |
| 1958 | 8 16 | 0  | 3 CLEO  | 19.6 | 49.8 | 140 | 948  |
| 1958 | 8 16 | 6  | 3 CLEO  | 21.0 | 50.3 | 115 | 955  |
| 1958 | 8 16 | 12 | 3 CLEO  | 22.4 | 50.8 | 110 | 955  |
| 1958 | 8 16 | 18 | 3 CLEO  | 23.9 | 51.4 | 110 | 957  |
| 1958 | 8 17 | 0  | 3 CLEO  | 25.4 | 52.2 | 110 | 963  |
| 1958 | 8 17 | 6  | 3 CLEO  | 26.9 | 53.2 | 110 | 967  |
| 1958 | 8 17 | 12 | 3 CLEO  | 28.2 | 54.3 | 110 | 971  |
| 1958 | 8 17 | 18 | 3 CLEO  | 29.3 | 55.2 | 105 | 970  |
| 1958 | 8 18 | 0  | 3 CLEO  | 30.4 | 55.9 | 100 | 968  |
| 1958 | 8 18 | 6  | 3 CLEO  | 31.6 | 56.4 | 95  | 971  |
| 1958 | 8 18 | 12 | 3 CLEO  | 32.8 | 56.5 | 90  | 973  |
| 1958 | 8 18 | 18 | 3 CLEO  | 34.1 | 56.2 | 85  | 972  |
| 1958 | 8 19 | 0  | 3 CLEO  | 35.7 | 55.5 | 85  | 971  |
| 1958 | 8 19 | 6  | 3 CLEO  | 37.6 | 54.3 | 80  | 972  |
| 1958 | 8 19 | 12 | 3 CLEO  | 39.8 | 52.5 | 80  | 974  |
| 1958 | 8 19 | 18 | 3 CLEO  | 42.3 | 50.1 | 80  | 979  |
| 1958 | 8 20 | 0  | 3 CLEO  | 44.8 | 47.1 | 75  | 0    |
| 1958 | 8 20 | 6  | 3 CLEO  | 46.6 | 43.8 | 65  | 0    |
| 1958 | 8 20 | 12 | 3 CLEO  | 47.0 | 40.0 | 60  | 0    |
| 1958 | 8 20 | 18 | 3 CLEO  | 46.3 | 35.7 | 60  | 0    |
| 1958 | 8 21 | 0  | 3 CLEO  | 45.3 | 31.4 | 55  | 0    |
| 1958 | 8 21 | 6  | 3 CLEO  | 44.2 | 27.3 | 40  | 0    |
| 1958 | 8 21 | 12 | 3 CLEO  | 43.0 | 23.2 | 35  | 0    |
| 1958 | 8 21 | 18 | 3 CLEO  | 42.0 | 20.5 | 35  | 0    |
| 1958 | 8 22 | 0  | 3 CLEO  | 41.0 | 18.0 | 30  | 0    |
| 1958 | 8 24 | 12 | 4 DAISY | 25.2 | 73.6 | 35  | 0    |
| 1958 | 8 24 | 18 | 4 DAISY | 25.9 | 74.6 | 40  | 0    |
| 1958 | 8 25 | 0  | 4 DAISY | 26.4 | 75.3 | 50  | 1002 |
| 1958 | 8 25 | 6  | 4 DAISY | 26.7 | 75.7 | 55  | 1000 |
| 1958 | 8 25 | 12 | 4 DAISY | 27.0 | 76.0 | 65  | 997  |
| 1958 | 8 25 | 18 | 4 DAISY | 27.2 | 76.3 | 65  | 994  |
| 1958 | 8 26 | 0  | 4 DAISY | 27.4 | 76.5 | 65  | 989  |
| 1958 | 8 26 | 6  | 4 DAISY | 27.8 | 76.8 | 65  | 985  |
| 1958 | 8 26 | 12 | 4 DAISY | 28.1 | 77.0 | 70  | 979  |
| 1958 | 8 26 | 18 | 4 DAISY | 28.5 | 77.1 | 75  | 974  |
| 1958 | 8 27 | 0  | 4 DAISY | 28.8 | 76.9 | 80  | 968  |



|      |         |           |         |      |      |      |     |
|------|---------|-----------|---------|------|------|------|-----|
| 1958 | 8 27    | 6         | 4 DAISY | 29.1 | 76.6 | 85   | 963 |
| 1958 | 8 27 12 | 4 DAISY   | 29.4    | 76.2 | 90   | 956  |     |
| 1958 | 8 27 18 | 4 DAISY   | 29.8    | 75.7 | 95   | 944  |     |
| 1958 | 8 28    | 0 4 DAISY | 30.4    | 75.1 | 105  | 935  |     |
| 1958 | 8 28    | 6 4 DAISY | 31.5    | 74.6 | 110  | 938  |     |
| 1958 | 8 28 12 | 4 DAISY   | 33.0    | 74.2 | 110  | 946  |     |
| 1958 | 8 28 18 | 4 DAISY   | 34.6    | 74.1 | 110  | 955  |     |
| 1958 | 8 29    | 0 4 DAISY | 36.2    | 74.0 | 110  | 963  |     |
| 1958 | 8 29    | 6 4 DAISY | 38.0    | 72.9 | 110  | 970  |     |
| 1958 | 8 29 12 | 4 DAISY   | 39.8    | 70.8 | 105  | 977  |     |
| 1958 | 8 29 18 | 4 DAISY   | 41.2    | 68.3 | 90   | 982  |     |
| 1958 | 8 30    | 0 4 DAISY | 42.0    | 65.0 | 85   | 987  |     |
| 1958 | 8 30    | 6 4 DAISY | 43.0    | 60.5 | 55   | 0    |     |
| 1958 | 8 30 12 | 4 DAISY   | 42.2    | 56.1 | 50   | 0    |     |
| 1958 | 8 30 18 | 4 DAISY   | 41.5    | 52.9 | 50   | 0    |     |
| 1958 | 8 31    | 0 4 DAISY | 41.0    | 49.6 | 45   | 0    |     |
| 1958 | 8 31    | 6 4 DAISY | 41.0    | 45.9 | 40   | 0    |     |
| 1958 | 8 31 12 | 4 DAISY   | 41.0    | 42.2 | 35   | 0    |     |
| 1958 | 8 31 18 | 4 DAISY   | 41.7    | 38.9 | 30   | 0    |     |
| 1958 | 8 30    | 6 5 ELLA  | 13.7    | 56.6 | 30   | 0    |     |
| 1958 | 8 30 12 | 5 ELLA    | 14.0    | 59.6 | 35   | 0    |     |
| 1958 | 8 30 18 | 5 ELLA    | 15.4    | 62.0 | 35   | 0    |     |
| 1958 | 8 31    | 0 5 ELLA  | 16.1    | 64.0 | 35   | 1009 |     |
| 1958 | 8 31    | 6 5 ELLA  | 16.2    | 65.6 | 50   | 0    |     |
| 1958 | 8 31 12 | 5 ELLA    | 16.3    | 67.2 | 65   | 0    |     |
| 1958 | 8 31 18 | 5 ELLA    | 16.5    | 69.3 | 85   | 0    |     |
| 1958 | 9 1     | 0 5 ELLA  | 16.9    | 71.1 | 95   | 0    |     |
| 1958 | 9 1     | 6 5 ELLA  | 17.6    | 72.4 | 95   | 0    |     |
| 1958 | 9 1 12  | 5 ELLA    | 18.4    | 73.7 | 95   | 0    |     |
| 1958 | 9 1 18  | 5 ELLA    | 19.2    | 75.0 | 95   | 0    |     |
| 1958 | 9 2     | 0 5 ELLA  | 20.0    | 76.3 | 100  | 0    |     |
| 1958 | 9 2     | 6 5 ELLA  | 20.6    | 77.2 | 70   | 0    |     |
| 1958 | 9 2 12  | 5 ELLA    | 21.0    | 78.0 | 60   | 0    |     |
| 1958 | 9 2 18  | 5 ELLA    | 21.4    | 79.1 | 45   | 0    |     |
| 1958 | 9 3     | 0 5 ELLA  | 21.8    | 80.2 | 45   | 0    |     |
| 1958 | 9 3     | 6 5 ELLA  | 21.9    | 81.1 | 45   | 0    |     |
| 1958 | 9 3 12  | 5 ELLA    | 22.0    | 82.0 | 55   | 0    |     |
| 1958 | 9 3 18  | 5 ELLA    | 22.3    | 83.2 | 60   | 0    |     |
| 1958 | 9 4     | 0 5 ELLA  | 22.7    | 84.5 | 60   | 0    |     |
| 1958 | 9 4     | 6 5 ELLA  | 22.9    | 85.6 | 60   | 0    |     |
| 1958 | 9 4 12  | 5 ELLA    | 23.2    | 86.7 | 60   | 0    |     |
| 1958 | 9 4 18  | 5 ELLA    | 23.9    | 88.1 | 60   | 0    |     |
| 1958 | 9 5     | 0 5 ELLA  | 24.6    | 89.5 | 60   | 0    |     |
| 1958 | 9 5     | 6 5 ELLA  | 25.4    | 90.8 | 60   | 0    |     |

|      |   |    |    |         |      |       |    |      |
|------|---|----|----|---------|------|-------|----|------|
| 1958 | 9 | 5  | 12 | 5 ELLA  | 26.1 | 92.1  | 60 | 0    |
| 1958 | 9 | 5  | 18 | 5 ELLA  | 26.6 | 93.2  | 60 | 0    |
| 1958 | 9 | 6  | 0  | 5 ELLA  | 27.0 | 94.5  | 55 | 0    |
| 1958 | 9 | 6  | 6  | 5 ELLA  | 27.5 | 96.3  | 40 | 0    |
| 1958 | 9 | 6  | 12 | 5 ELLA  | 28.1 | 98.2  | 30 | 0    |
| 1958 | 9 | 6  | 18 | 5 ELLA  | 28.3 | 100.5 | 30 | 0    |
| 1958 | 9 | 4  | 12 | 6 FIFI  | 10.1 | 44.8  | 25 | 0    |
| 1958 | 9 | 4  | 18 | 6 FIFI  | 10.6 | 46.2  | 25 | 0    |
| 1958 | 9 | 5  | 0  | 6 FIFI  | 11.1 | 47.5  | 25 | 0    |
| 1958 | 9 | 5  | 6  | 6 FIFI  | 11.6 | 48.6  | 30 | 0    |
| 1958 | 9 | 5  | 12 | 6 FIFI  | 12.2 | 49.8  | 45 | 0    |
| 1958 | 9 | 5  | 18 | 6 FIFI  | 13.3 | 51.9  | 45 | 0    |
| 1958 | 9 | 6  | 0  | 6 FIFI  | 14.5 | 54.1  | 50 | 1000 |
| 1958 | 9 | 6  | 6  | 6 FIFI  | 15.6 | 55.7  | 65 | 0    |
| 1958 | 9 | 6  | 12 | 6 FIFI  | 16.6 | 57.1  | 75 | 0    |
| 1958 | 9 | 6  | 18 | 6 FIFI  | 17.5 | 58.3  | 80 | 0    |
| 1958 | 9 | 7  | 0  | 6 FIFI  | 18.4 | 59.6  | 75 | 0    |
| 1958 | 9 | 7  | 6  | 6 FIFI  | 19.5 | 61.0  | 65 | 0    |
| 1958 | 9 | 7  | 12 | 6 FIFI  | 20.6 | 62.3  | 65 | 0    |
| 1958 | 9 | 7  | 18 | 6 FIFI  | 21.3 | 63.4  | 65 | 0    |
| 1958 | 9 | 8  | 0  | 6 FIFI  | 21.9 | 64.2  | 60 | 0    |
| 1958 | 9 | 8  | 6  | 6 FIFI  | 22.6 | 64.8  | 60 | 0    |
| 1958 | 9 | 8  | 12 | 6 FIFI  | 23.0 | 65.3  | 60 | 0    |
| 1958 | 9 | 8  | 18 | 6 FIFI  | 23.1 | 65.6  | 55 | 0    |
| 1958 | 9 | 9  | 0  | 6 FIFI  | 23.3 | 65.8  | 50 | 0    |
| 1958 | 9 | 9  | 6  | 6 FIFI  | 23.5 | 65.9  | 50 | 0    |
| 1958 | 9 | 9  | 12 | 6 FIFI  | 23.6 | 66.0  | 50 | 0    |
| 1958 | 9 | 9  | 18 | 6 FIFI  | 23.8 | 66.2  | 50 | 0    |
| 1958 | 9 | 10 | 0  | 6 FIFI  | 24.1 | 66.5  | 50 | 0    |
| 1958 | 9 | 10 | 6  | 6 FIFI  | 24.7 | 66.8  | 45 | 0    |
| 1958 | 9 | 10 | 12 | 6 FIFI  | 25.5 | 67.1  | 45 | 0    |
| 1958 | 9 | 10 | 18 | 6 FIFI  | 26.4 | 67.1  | 40 | 0    |
| 1958 | 9 | 11 | 0  | 6 FIFI  | 27.2 | 66.9  | 40 | 0    |
| 1958 | 9 | 11 | 6  | 6 FIFI  | 27.6 | 66.7  | 40 | 0    |
| 1958 | 9 | 11 | 12 | 6 FIFI  | 28.0 | 66.2  | 40 | 0    |
| 1958 | 9 | 11 | 18 | 6 FIFI  | 28.9 | 65.3  | 50 | 0    |
| 1958 | 9 | 12 | 0  | 6 FIFI  | 29.7 | 64.3  | 55 | 0    |
| 1958 | 9 | 12 | 6  | 6 FIFI  | 30.2 | 63.2  | 45 | 0    |
| 1958 | 9 | 12 | 12 | 6 FIFI  | 30.7 | 62.1  | 35 | 0    |
| 1958 | 9 | 12 | 18 | 6 FIFI  | 31.3 | 61.3  | 25 | 0    |
| 1958 | 9 | 13 | 12 | 7 GERDA | 15.1 | 62.0  | 25 | 0    |
| 1958 | 9 | 13 | 18 | 7 GERDA | 15.9 | 64.2  | 35 | 0    |
| 1958 | 9 | 14 | 0  | 7 GERDA | 16.6 | 66.1  | 35 | 0    |
| 1958 | 9 | 14 | 6  | 7 GERDA | 17.2 | 67.9  | 45 | 0    |

|      |         |          |      |      |     |      |
|------|---------|----------|------|------|-----|------|
| 1958 | 9 14 12 | 7 GERDA  | 17.6 | 69.4 | 50  | 0    |
| 1958 | 9 14 18 | 7 GERDA  | 17.9 | 70.6 | 60  | 1004 |
| 1958 | 9 15 0  | 7 GERDA  | 18.2 | 71.9 | 45  | 0    |
| 1958 | 9 15 6  | 7 GERDA  | 18.6 | 73.3 | 40  | 0    |
| 1958 | 9 15 12 | 7 GERDA  | 19.0 | 74.8 | 35  | 0    |
| 1958 | 9 15 18 | 7 GERDA  | 19.5 | 76.8 | 25  | 0    |
| 1958 | 9 21 6  | 8 HELENE | 18.5 | 51.5 | 25  | 0    |
| 1958 | 9 21 12 | 8 HELENE | 19.0 | 54.2 | 25  | 0    |
| 1958 | 9 21 18 | 8 HELENE | 19.5 | 56.3 | 25  | 0    |
| 1958 | 9 22 0  | 8 HELENE | 20.1 | 58.3 | 25  | 0    |
| 1958 | 9 22 6  | 8 HELENE | 20.7 | 60.2 | 25  | 0    |
| 1958 | 9 22 12 | 8 HELENE | 21.3 | 61.9 | 25  | 1015 |
| 1958 | 9 22 18 | 8 HELENE | 21.9 | 63.5 | 30  | 1014 |
| 1958 | 9 23 0  | 8 HELENE | 22.5 | 64.8 | 35  | 1013 |
| 1958 | 9 23 6  | 8 HELENE | 23.0 | 65.8 | 40  | 1011 |
| 1958 | 9 23 12 | 8 HELENE | 23.4 | 66.9 | 45  | 1009 |
| 1958 | 9 23 18 | 8 HELENE | 24.0 | 68.2 | 45  | 1007 |
| 1958 | 9 24 0  | 8 HELENE | 24.7 | 69.6 | 45  | 1005 |
| 1958 | 9 24 6  | 8 HELENE | 25.7 | 70.9 | 50  | 1004 |
| 1958 | 9 24 12 | 8 HELENE | 26.7 | 72.0 | 65  | 1002 |
| 1958 | 9 24 18 | 8 HELENE | 27.2 | 72.9 | 65  | 998  |
| 1958 | 9 25 0  | 8 HELENE | 27.7 | 73.4 | 65  | 993  |
| 1958 | 9 25 6  | 8 HELENE | 28.3 | 73.6 | 70  | 987  |
| 1958 | 9 25 12 | 8 HELENE | 28.8 | 73.9 | 75  | 984  |
| 1958 | 9 25 18 | 8 HELENE | 29.2 | 74.3 | 80  | 983  |
| 1958 | 9 26 0  | 8 HELENE | 29.6 | 74.8 | 85  | 980  |
| 1958 | 9 26 6  | 8 HELENE | 29.9 | 75.4 | 85  | 977  |
| 1958 | 9 26 12 | 8 HELENE | 30.3 | 76.1 | 90  | 967  |
| 1958 | 9 26 18 | 8 HELENE | 31.0 | 77.1 | 105 | 955  |
| 1958 | 9 27 0  | 8 HELENE | 31.7 | 78.1 | 110 | 943  |
| 1958 | 9 27 6  | 8 HELENE | 32.4 | 78.5 | 110 | 934  |
| 1958 | 9 27 12 | 8 HELENE | 33.1 | 78.2 | 115 | 938  |
| 1958 | 9 27 18 | 8 HELENE | 33.9 | 77.5 | 115 | 943  |
| 1958 | 9 28 0  | 8 HELENE | 34.8 | 75.8 | 110 | 946  |
| 1958 | 9 28 6  | 8 HELENE | 35.8 | 73.2 | 110 | 950  |
| 1958 | 9 28 12 | 8 HELENE | 36.9 | 70.5 | 105 | 954  |
| 1958 | 9 28 18 | 8 HELENE | 38.0 | 68.3 | 90  | 957  |
| 1958 | 9 29 0  | 8 HELENE | 39.0 | 65.9 | 85  | 959  |
| 1958 | 9 29 6  | 8 HELENE | 41.7 | 61.9 | 70  | 963  |
| 1958 | 9 29 12 | 8 HELENE | 45.7 | 59.0 | 65  | 966  |
| 1958 | 9 29 18 | 8 HELENE | 49.0 | 56.6 | 65  | 968  |
| 1958 | 9 30 0  | 8 HELENE | 52.0 | 52.4 | 60  | 972  |
| 1958 | 9 30 6  | 8 HELENE | 53.9 | 48.8 | 60  | 0    |
| 1958 | 9 30 12 | 8 HELENE | 55.0 | 45.0 | 60  | 0    |

|      |    |    |    |    |        |      |      |     |     |
|------|----|----|----|----|--------|------|------|-----|-----|
| 1958 | 9  | 30 | 18 | 8  | HELENE | 56.2 | 41.1 | 55  | 0   |
| 1958 | 10 | 1  | 0  | 8  | HELENE | 57.0 | 37.3 | 55  | 0   |
| 1958 | 10 | 1  | 6  | 8  | HELENE | 57.3 | 34.5 | 55  | 0   |
| 1958 | 10 | 1  | 12 | 8  | HELENE | 57.5 | 32.0 | 50  | 0   |
| 1958 | 10 | 1  | 18 | 8  | HELENE | 57.7 | 28.9 | 50  | 0   |
| 1958 | 10 | 2  | 0  | 8  | HELENE | 57.5 | 25.5 | 50  | 0   |
| 1958 | 10 | 2  | 6  | 8  | HELENE | 56.1 | 21.2 | 45  | 0   |
| 1958 | 10 | 2  | 12 | 8  | HELENE | 54.3 | 17.3 | 45  | 0   |
| 1958 | 10 | 2  | 18 | 8  | HELENE | 53.1 | 15.4 | 45  | 0   |
| 1958 | 10 | 3  | 0  | 8  | HELENE | 52.2 | 14.2 | 40  | 0   |
| 1958 | 10 | 3  | 6  | 8  | HELENE | 51.8 | 13.4 | 35  | 0   |
| 1958 | 10 | 3  | 12 | 8  | HELENE | 51.4 | 12.5 | 35  | 0   |
| 1958 | 10 | 3  | 18 | 8  | HELENE | 51.0 | 10.4 | 35  | 0   |
| 1958 | 10 | 4  | 0  | 8  | HELENE | 50.5 | 7.3  | 35  | 0   |
| 1958 | 10 | 4  | 6  | 8  | HELENE | 51.6 | 4.9  | 35  | 0   |
| 1958 | 9  | 24 | 6  | 9  | ILSA   | 17.3 | 50.8 | 30  | 0   |
| 1958 | 9  | 24 | 12 | 9  | ILSA   | 17.7 | 52.1 | 35  | 0   |
| 1958 | 9  | 24 | 18 | 9  | ILSA   | 18.1 | 54.3 | 40  | 998 |
| 1958 | 9  | 25 | 0  | 9  | ILSA   | 18.3 | 55.7 | 45  | 0   |
| 1958 | 9  | 25 | 6  | 9  | ILSA   | 18.4 | 56.4 | 50  | 0   |
| 1958 | 9  | 25 | 12 | 9  | ILSA   | 18.5 | 57.1 | 65  | 0   |
| 1958 | 9  | 25 | 18 | 9  | ILSA   | 18.7 | 57.9 | 65  | 0   |
| 1958 | 9  | 26 | 0  | 9  | ILSA   | 19.0 | 58.8 | 70  | 0   |
| 1958 | 9  | 26 | 6  | 9  | ILSA   | 19.4 | 59.8 | 75  | 0   |
| 1958 | 9  | 26 | 12 | 9  | ILSA   | 20.0 | 60.7 | 95  | 0   |
| 1958 | 9  | 26 | 18 | 9  | ILSA   | 20.7 | 61.1 | 105 | 0   |
| 1958 | 9  | 27 | 0  | 9  | ILSA   | 21.4 | 61.2 | 115 | 0   |
| 1958 | 9  | 27 | 6  | 9  | ILSA   | 21.9 | 61.3 | 110 | 0   |
| 1958 | 9  | 27 | 12 | 9  | ILSA   | 22.3 | 61.3 | 105 | 0   |
| 1958 | 9  | 27 | 18 | 9  | ILSA   | 23.2 | 61.2 | 100 | 0   |
| 1958 | 9  | 28 | 0  | 9  | ILSA   | 24.5 | 61.1 | 100 | 0   |
| 1958 | 9  | 28 | 6  | 9  | ILSA   | 26.2 | 61.5 | 95  | 0   |
| 1958 | 9  | 28 | 12 | 9  | ILSA   | 28.0 | 61.9 | 90  | 0   |
| 1958 | 9  | 28 | 18 | 9  | ILSA   | 29.5 | 61.6 | 90  | 0   |
| 1958 | 9  | 29 | 0  | 9  | ILSA   | 31.0 | 60.8 | 90  | 0   |
| 1958 | 9  | 29 | 6  | 9  | ILSA   | 32.8 | 59.5 | 85  | 0   |
| 1958 | 9  | 29 | 12 | 9  | ILSA   | 34.8 | 57.6 | 85  | 0   |
| 1958 | 9  | 29 | 18 | 9  | ILSA   | 37.1 | 54.9 | 80  | 0   |
| 1958 | 9  | 30 | 0  | 9  | ILSA   | 39.9 | 51.3 | 60  | 0   |
| 1958 | 9  | 30 | 6  | 9  | ILSA   | 43.1 | 47.8 | 55  | 0   |
| 1958 | 10 | 5  | 6  | 10 | JANICE | 19.2 | 81.3 | 30  | 0   |
| 1958 | 10 | 5  | 12 | 10 | JANICE | 20.0 | 81.6 | 30  | 0   |
| 1958 | 10 | 5  | 18 | 10 | JANICE | 20.9 | 81.5 | 35  | 999 |
| 1958 | 10 | 6  | 0  | 10 | JANICE | 21.8 | 81.0 | 40  | 999 |

|                         |      |      |    |      |
|-------------------------|------|------|----|------|
| 1958 10 6 6 10 JANICE   | 22.5 | 80.1 | 45 | 999  |
| 1958 10 6 12 10 JANICE  | 23.3 | 79.1 | 50 | 998  |
| 1958 10 6 18 10 JANICE  | 24.6 | 77.8 | 55 | 997  |
| 1958 10 7 0 10 JANICE   | 26.0 | 76.6 | 60 | 996  |
| 1958 10 7 6 10 JANICE   | 27.2 | 75.6 | 65 | 988  |
| 1958 10 7 12 10 JANICE  | 28.2 | 75.0 | 75 | 987  |
| 1958 10 7 18 10 JANICE  | 28.7 | 74.7 | 80 | 990  |
| 1958 10 8 0 10 JANICE   | 29.2 | 74.5 | 80 | 995  |
| 1958 10 8 6 10 JANICE   | 30.0 | 74.2 | 80 | 995  |
| 1958 10 8 12 10 JANICE  | 30.8 | 73.8 | 80 | 992  |
| 1958 10 8 18 10 JANICE  | 31.5 | 73.3 | 70 | 990  |
| 1958 10 9 0 10 JANICE   | 32.0 | 72.6 | 70 | 987  |
| 1958 10 9 6 10 JANICE   | 32.1 | 71.9 | 65 | 985  |
| 1958 10 9 12 10 JANICE  | 32.2 | 71.0 | 65 | 983  |
| 1958 10 9 18 10 JANICE  | 32.7 | 69.7 | 65 | 977  |
| 1958 10 10 0 10 JANICE  | 33.3 | 68.2 | 65 | 970  |
| 1958 10 10 6 10 JANICE  | 34.1 | 67.0 | 75 | 968  |
| 1958 10 10 12 10 JANICE | 35.0 | 65.8 | 80 | 970  |
| 1958 10 10 18 10 JANICE | 36.0 | 63.9 | 80 | 970  |
| 1958 10 11 0 10 JANICE  | 37.0 | 61.5 | 80 | 968  |
| 1958 10 11 6 10 JANICE  | 38.1 | 59.0 | 80 | 972  |
| 1958 10 11 12 10 JANICE | 39.3 | 56.0 | 75 | 0    |
| 1958 10 11 18 10 JANICE | 41.2 | 51.3 | 70 | 0    |
| 1958 10 12 0 10 JANICE  | 43.3 | 46.1 | 65 | 0    |
| 1958 10 12 6 10 JANICE  | 44.9 | 42.2 | 50 | 0    |
| 1958 10 12 12 10 JANICE | 46.2 | 38.2 | 50 | 0    |
| 1958 10 12 18 10 JANICE | 47.2 | 33.5 | 50 | 0    |
| 1958 10 13 0 10 JANICE  | 48.0 | 28.2 | 45 | 0    |
| 1958 10 13 6 10 JANICE  | 48.7 | 23.5 | 45 | 0    |
| 1959 5 28 12 1 ARLENE   | 23.8 | 86.6 | 30 | 0    |
| 1959 5 28 18 1 ARLENE   | 24.5 | 87.2 | 30 | 0    |
| 1959 5 29 0 1 ARLENE    | 25.3 | 87.7 | 35 | 0    |
| 1959 5 29 6 1 ARLENE    | 26.5 | 89.0 | 35 | 0    |
| 1959 5 29 12 1 ARLENE   | 27.4 | 90.0 | 40 | 0    |
| 1959 5 29 18 1 ARLENE   | 27.6 | 90.8 | 45 | 0    |
| 1959 5 30 0 1 ARLENE    | 27.8 | 91.5 | 45 | 1000 |
| 1959 5 30 6 1 ARLENE    | 28.1 | 91.9 | 45 | 1000 |
| 1959 5 30 12 1 ARLENE   | 28.4 | 92.0 | 50 | 1000 |
| 1959 5 30 18 1 ARLENE   | 29.1 | 91.9 | 40 | 0    |
| 1959 5 31 0 1 ARLENE    | 29.9 | 91.7 | 30 | 0    |
| 1959 5 31 6 1 ARLENE    | 30.4 | 91.5 | 25 | 0    |
| 1959 5 31 12 1 ARLENE   | 31.0 | 91.2 | 25 | 0    |
| 1959 5 31 18 1 ARLENE   | 31.7 | 90.9 | 25 | 0    |
| 1959 6 1 0 1 ARLENE     | 32.3 | 90.6 | 25 | 0    |

|      |   |    |    |   |           |      |      |    |     |
|------|---|----|----|---|-----------|------|------|----|-----|
| 1959 | 6 | 1  | 6  | 1 | ARLENE    | 32.8 | 89.9 | 25 | 0   |
| 1959 | 6 | 1  | 12 | 1 | ARLENE    | 33.1 | 89.1 | 25 | 0   |
| 1959 | 6 | 1  | 18 | 1 | ARLENE    | 33.2 | 88.6 | 25 | 0   |
| 1959 | 6 | 2  | 0  | 1 | ARLENE    | 33.4 | 87.4 | 25 | 0   |
| 1959 | 6 | 2  | 6  | 1 | ARLENE    | 33.6 | 85.3 | 25 | 0   |
| 1959 | 6 | 2  | 12 | 1 | ARLENE    | 33.8 | 83.3 | 25 | 0   |
| 1959 | 6 | 2  | 18 | 1 | ARLENE    | 34.2 | 80.7 | 25 | 0   |
| 1959 | 6 | 15 | 18 | 2 | BEULAH    | 21.1 | 94.7 | 25 | 0   |
| 1959 | 6 | 16 | 0  | 2 | BEULAH    | 21.7 | 95.2 | 25 | 0   |
| 1959 | 6 | 16 | 6  | 2 | BEULAH    | 22.0 | 95.6 | 45 | 0   |
| 1959 | 6 | 16 | 12 | 2 | BEULAH    | 22.3 | 96.0 | 50 | 0   |
| 1959 | 6 | 16 | 18 | 2 | BEULAH    | 22.6 | 96.2 | 50 | 0   |
| 1959 | 6 | 17 | 0  | 2 | BEULAH    | 22.8 | 96.3 | 55 | 0   |
| 1959 | 6 | 17 | 6  | 2 | BEULAH    | 23.0 | 96.5 | 55 | 0   |
| 1959 | 6 | 17 | 12 | 2 | BEULAH    | 23.1 | 96.7 | 55 | 0   |
| 1959 | 6 | 17 | 18 | 2 | BEULAH    | 23.2 | 97.1 | 60 | 987 |
| 1959 | 6 | 18 | 0  | 2 | BEULAH    | 23.0 | 97.3 | 55 | 0   |
| 1959 | 6 | 18 | 6  | 2 | BEULAH    | 22.4 | 97.3 | 45 | 0   |
| 1959 | 6 | 18 | 12 | 2 | BEULAH    | 21.8 | 97.2 | 35 | 0   |
| 1959 | 6 | 18 | 18 | 2 | BEULAH    | 21.2 | 97.2 | 30 | 0   |
| 1959 | 6 | 18 | 0  | 3 | NOT NAMED | 25.6 | 86.7 | 30 | 0   |
| 1959 | 6 | 18 | 6  | 3 | NOT NAMED | 27.2 | 83.5 | 30 | 0   |
| 1959 | 6 | 18 | 12 | 3 | NOT NAMED | 28.8 | 80.3 | 30 | 0   |
| 1959 | 6 | 18 | 18 | 3 | NOT NAMED | 30.4 | 77.7 | 35 | 0   |
| 1959 | 6 | 19 | 0  | 3 | NOT NAMED | 32.2 | 75.1 | 50 | 993 |
| 1959 | 6 | 19 | 6  | 3 | NOT NAMED | 35.0 | 70.5 | 60 | 0   |
| 1959 | 6 | 19 | 12 | 3 | NOT NAMED | 38.4 | 65.3 | 65 | 974 |
| 1959 | 6 | 19 | 18 | 3 | NOT NAMED | 41.2 | 62.1 | 70 | 0   |
| 1959 | 6 | 20 | 0  | 3 | NOT NAMED | 43.7 | 60.6 | 70 | 0   |
| 1959 | 6 | 20 | 6  | 3 | NOT NAMED | 45.3 | 61.0 | 60 | 0   |
| 1959 | 6 | 20 | 12 | 3 | NOT NAMED | 46.0 | 62.8 | 50 | 0   |
| 1959 | 6 | 20 | 18 | 3 | NOT NAMED | 45.6 | 62.2 | 50 | 0   |
| 1959 | 6 | 21 | 0  | 3 | NOT NAMED | 45.4 | 60.2 | 45 | 0   |
| 1959 | 6 | 21 | 6  | 3 | NOT NAMED | 46.3 | 57.0 | 45 | 0   |
| 1959 | 6 | 21 | 12 | 3 | NOT NAMED | 47.3 | 53.7 | 45 | 0   |
| 1959 | 6 | 21 | 18 | 3 | NOT NAMED | 48.6 | 49.8 | 45 | 0   |
| 1959 | 7 | 5  | 12 | 4 | CINDY     | 29.6 | 78.5 | 25 | 0   |
| 1959 | 7 | 5  | 18 | 4 | CINDY     | 29.8 | 78.3 | 25 | 0   |
| 1959 | 7 | 6  | 0  | 4 | CINDY     | 30.0 | 78.2 | 25 | 0   |
| 1959 | 7 | 6  | 6  | 4 | CINDY     | 30.3 | 78.0 | 25 | 0   |
| 1959 | 7 | 6  | 12 | 4 | CINDY     | 30.6 | 77.9 | 25 | 0   |
| 1959 | 7 | 6  | 18 | 4 | CINDY     | 30.9 | 77.6 | 25 | 0   |
| 1959 | 7 | 7  | 0  | 4 | CINDY     | 31.2 | 77.3 | 30 | 0   |
| 1959 | 7 | 7  | 6  | 4 | CINDY     | 31.5 | 77.1 | 35 | 0   |

|      |   |    |    |   |       |      |       |    |      |
|------|---|----|----|---|-------|------|-------|----|------|
| 1959 | 7 | 7  | 12 | 4 | CINDY | 31.7 | 77.0  | 45 | 0    |
| 1959 | 7 | 7  | 18 | 4 | CINDY | 32.1 | 76.8  | 50 | 0    |
| 1959 | 7 | 8  | 0  | 4 | CINDY | 32.4 | 76.9  | 55 | 0    |
| 1959 | 7 | 8  | 6  | 4 | CINDY | 32.4 | 77.5  | 60 | 0    |
| 1959 | 7 | 8  | 12 | 4 | CINDY | 32.3 | 78.2  | 65 | 0    |
| 1959 | 7 | 8  | 18 | 4 | CINDY | 32.3 | 78.8  | 65 | 0    |
| 1959 | 7 | 9  | 0  | 4 | CINDY | 32.4 | 79.3  | 65 | 0    |
| 1959 | 7 | 9  | 6  | 4 | CINDY | 33.0 | 79.8  | 50 | 0    |
| 1959 | 7 | 9  | 12 | 4 | CINDY | 33.7 | 80.2  | 35 | 0    |
| 1959 | 7 | 9  | 18 | 4 | CINDY | 34.1 | 80.3  | 30 | 0    |
| 1959 | 7 | 10 | 0  | 4 | CINDY | 34.5 | 79.9  | 30 | 0    |
| 1959 | 7 | 10 | 6  | 4 | CINDY | 35.1 | 79.2  | 30 | 0    |
| 1959 | 7 | 10 | 12 | 4 | CINDY | 35.9 | 77.9  | 30 | 0    |
| 1959 | 7 | 10 | 18 | 4 | CINDY | 37.0 | 76.2  | 35 | 0    |
| 1959 | 7 | 11 | 0  | 4 | CINDY | 38.2 | 74.3  | 40 | 0    |
| 1959 | 7 | 11 | 6  | 4 | CINDY | 39.5 | 72.4  | 45 | 0    |
| 1959 | 7 | 11 | 12 | 4 | CINDY | 41.2 | 70.3  | 50 | 0    |
| 1959 | 7 | 11 | 18 | 4 | CINDY | 43.5 | 67.7  | 50 | 0    |
| 1959 | 7 | 12 | 0  | 4 | CINDY | 45.8 | 64.9  | 45 | 0    |
| 1959 | 7 | 12 | 6  | 4 | CINDY | 48.0 | 62.0  | 35 | 0    |
| 1959 | 7 | 12 | 12 | 4 | CINDY | 50.2 | 59.1  | 35 | 0    |
| 1959 | 7 | 12 | 18 | 4 | CINDY | 52.4 | 56.2  | 35 | 0    |
| 1959 | 7 | 23 | 0  | 5 | DEBRA | 26.9 | 92.1  | 25 | 0    |
| 1959 | 7 | 23 | 6  | 5 | DEBRA | 27.2 | 92.6  | 30 | 0    |
| 1959 | 7 | 23 | 12 | 5 | DEBRA | 27.5 | 93.1  | 35 | 0    |
| 1959 | 7 | 23 | 18 | 5 | DEBRA | 27.6 | 93.7  | 35 | 0    |
| 1959 | 7 | 24 | 0  | 5 | DEBRA | 27.6 | 94.4  | 35 | 0    |
| 1959 | 7 | 24 | 6  | 5 | DEBRA | 27.9 | 95.0  | 40 | 0    |
| 1959 | 7 | 24 | 12 | 5 | DEBRA | 28.3 | 95.4  | 65 | 1007 |
| 1959 | 7 | 24 | 18 | 5 | DEBRA | 28.5 | 95.3  | 65 | 0    |
| 1959 | 7 | 25 | 0  | 5 | DEBRA | 28.8 | 95.1  | 70 | 984  |
| 1959 | 7 | 25 | 6  | 5 | DEBRA | 29.2 | 95.1  | 75 | 0    |
| 1959 | 7 | 25 | 12 | 5 | DEBRA | 29.6 | 95.1  | 65 | 0    |
| 1959 | 7 | 25 | 18 | 5 | DEBRA | 30.1 | 95.1  | 60 | 0    |
| 1959 | 7 | 26 | 0  | 5 | DEBRA | 30.6 | 95.1  | 45 | 0    |
| 1959 | 7 | 26 | 6  | 5 | DEBRA | 31.3 | 95.2  | 30 | 0    |
| 1959 | 7 | 26 | 12 | 5 | DEBRA | 32.1 | 95.4  | 30 | 0    |
| 1959 | 7 | 26 | 18 | 5 | DEBRA | 33.1 | 95.6  | 30 | 0    |
| 1959 | 7 | 27 | 0  | 5 | DEBRA | 34.1 | 96.0  | 30 | 0    |
| 1959 | 7 | 27 | 6  | 5 | DEBRA | 35.0 | 96.8  | 25 | 0    |
| 1959 | 7 | 27 | 12 | 5 | DEBRA | 35.8 | 97.7  | 25 | 0    |
| 1959 | 7 | 27 | 18 | 5 | DEBRA | 36.2 | 98.4  | 25 | 0    |
| 1959 | 7 | 28 | 0  | 5 | DEBRA | 36.3 | 99.5  | 25 | 0    |
| 1959 | 7 | 28 | 6  | 5 | DEBRA | 36.4 | 100.3 | 25 | 0    |

|      |         |          |      |      |    |      |  |
|------|---------|----------|------|------|----|------|--|
| 1959 | 8 17 18 | 6 EDITH  | 13.7 | 56.3 | 30 | 1007 |  |
| 1959 | 8 18 0  | 6 EDITH  | 14.3 | 57.9 | 35 | 0    |  |
| 1959 | 8 18 6  | 6 EDITH  | 15.1 | 60.0 | 40 | 0    |  |
| 1959 | 8 18 12 | 6 EDITH  | 15.9 | 61.0 | 50 | 0    |  |
| 1959 | 8 18 18 | 6 EDITH  | 16.8 | 62.5 | 40 | 0    |  |
| 1959 | 8 19 0  | 6 EDITH  | 17.2 | 64.8 | 35 | 0    |  |
| 1959 | 8 19 6  | 6 EDITH  | 17.2 | 67.9 | 35 | 0    |  |
| 1959 | 8 19 12 | 6 EDITH  | 17.2 | 71.1 | 30 | 0    |  |
| 1959 | 9 9 6   | 7 FLORA  | 16.8 | 45.8 | 25 | 0    |  |
| 1959 | 9 9 12  | 7 FLORA  | 18.0 | 46.5 | 25 | 0    |  |
| 1959 | 9 9 18  | 7 FLORA  | 19.5 | 46.7 | 25 | 0    |  |
| 1959 | 9 10 0  | 7 FLORA  | 20.8 | 46.5 | 30 | 1008 |  |
| 1959 | 9 10 6  | 7 FLORA  | 22.0 | 46.0 | 35 | 0    |  |
| 1959 | 9 10 12 | 7 FLORA  | 23.1 | 45.4 | 40 | 0    |  |
| 1959 | 9 10 18 | 7 FLORA  | 24.3 | 44.7 | 45 | 0    |  |
| 1959 | 9 11 0  | 7 FLORA  | 25.6 | 43.9 | 50 | 0    |  |
| 1959 | 9 11 6  | 7 FLORA  | 27.1 | 42.7 | 55 | 0    |  |
| 1959 | 9 11 12 | 7 FLORA  | 28.7 | 41.3 | 65 | 0    |  |
| 1959 | 9 11 18 | 7 FLORA  | 30.3 | 39.8 | 65 | 994  |  |
| 1959 | 9 12 0  | 7 FLORA  | 31.9 | 37.6 | 65 | 0    |  |
| 1959 | 9 12 6  | 7 FLORA  | 34.0 | 34.2 | 65 | 0    |  |
| 1959 | 9 12 12 | 7 FLORA  | 36.2 | 30.7 | 65 | 0    |  |
| 1959 | 9 12 18 | 7 FLORA  | 37.5 | 27.3 | 60 | 0    |  |
| 1959 | 9 13 0  | 7 FLORA  | 38.7 | 24.1 | 55 | 0    |  |
| 1959 | 9 13 6  | 7 FLORA  | 41.8 | 22.9 | 50 | 0    |  |
| 1959 | 9 13 12 | 7 FLORA  | 45.0 | 22.9 | 50 | 0    |  |
| 1959 | 9 13 18 | 7 FLORA  | 46.5 | 24.1 | 45 | 0    |  |
| 1959 | 9 14 0  | 7 FLORA  | 47.0 | 26.3 | 45 | 0    |  |
| 1959 | 9 14 6  | 7 FLORA  | 48.4 | 28.8 | 45 | 0    |  |
| 1959 | 9 20 12 | 8 GRACIE | 19.7 | 68.6 | 25 | 0    |  |
| 1959 | 9 20 18 | 8 GRACIE | 19.9 | 69.9 | 25 | 0    |  |
| 1959 | 9 21 0  | 8 GRACIE | 20.1 | 71.3 | 25 | 0    |  |
| 1959 | 9 21 6  | 8 GRACIE | 20.3 | 72.7 | 30 | 0    |  |
| 1959 | 9 21 12 | 8 GRACIE | 20.6 | 74.0 | 30 | 0    |  |
| 1959 | 9 21 18 | 8 GRACIE | 21.2 | 74.5 | 30 | 0    |  |
| 1959 | 9 22 0  | 8 GRACIE | 21.8 | 74.1 | 35 | 0    |  |
| 1959 | 9 22 6  | 8 GRACIE | 22.2 | 73.6 | 45 | 0    |  |
| 1959 | 9 22 12 | 8 GRACIE | 22.6 | 73.2 | 50 | 0    |  |
| 1959 | 9 22 18 | 8 GRACIE | 23.3 | 73.0 | 65 | 997  |  |
| 1959 | 9 23 0  | 8 GRACIE | 23.9 | 72.9 | 85 | 0    |  |
| 1959 | 9 23 6  | 8 GRACIE | 24.4 | 73.0 | 85 | 0    |  |
| 1959 | 9 23 12 | 8 GRACIE | 24.8 | 73.3 | 85 | 0    |  |
| 1959 | 9 23 18 | 8 GRACIE | 25.3 | 73.9 | 80 | 0    |  |
| 1959 | 9 24 0  | 8 GRACIE | 25.8 | 74.6 | 75 | 0    |  |



|      |      |    |             |      |      |     |      |
|------|------|----|-------------|------|------|-----|------|
| 1959 | 9 24 | 6  | 8 GRACIE    | 26.1 | 75.0 | 70  | 0    |
| 1959 | 9 24 | 12 | 8 GRACIE    | 26.3 | 75.3 | 65  | 1000 |
| 1959 | 9 24 | 18 | 8 GRACIE    | 26.8 | 75.4 | 65  | 0    |
| 1959 | 9 25 | 0  | 8 GRACIE    | 27.3 | 75.4 | 65  | 0    |
| 1959 | 9 25 | 6  | 8 GRACIE    | 27.8 | 75.2 | 65  | 0    |
| 1959 | 9 25 | 12 | 8 GRACIE    | 28.1 | 75.0 | 65  | 0    |
| 1959 | 9 25 | 18 | 8 GRACIE    | 28.0 | 74.7 | 65  | 997  |
| 1959 | 9 26 | 0  | 8 GRACIE    | 27.7 | 74.4 | 65  | 0    |
| 1959 | 9 26 | 6  | 8 GRACIE    | 27.7 | 74.0 | 65  | 0    |
| 1959 | 9 26 | 12 | 8 GRACIE    | 27.7 | 73.6 | 65  | 0    |
| 1959 | 9 26 | 18 | 8 GRACIE    | 27.7 | 73.2 | 65  | 0    |
| 1959 | 9 27 | 0  | 8 GRACIE    | 27.8 | 73.1 | 65  | 0    |
| 1959 | 9 27 | 6  | 8 GRACIE    | 28.0 | 73.5 | 70  | 0    |
| 1959 | 9 27 | 12 | 8 GRACIE    | 28.2 | 74.0 | 75  | 0    |
| 1959 | 9 27 | 18 | 8 GRACIE    | 28.5 | 74.5 | 75  | 0    |
| 1959 | 9 28 | 0  | 8 GRACIE    | 28.7 | 75.0 | 80  | 979  |
| 1959 | 9 28 | 6  | 8 GRACIE    | 28.9 | 75.6 | 85  | 0    |
| 1959 | 9 28 | 12 | 8 GRACIE    | 29.0 | 76.3 | 90  | 0    |
| 1959 | 9 28 | 18 | 8 GRACIE    | 29.4 | 77.1 | 100 | 0    |
| 1959 | 9 29 | 0  | 8 GRACIE    | 29.9 | 77.9 | 110 | 0    |
| 1959 | 9 29 | 6  | 8 GRACIE    | 30.5 | 78.7 | 120 | 0    |
| 1959 | 9 29 | 12 | 8 GRACIE    | 31.3 | 79.6 | 120 | 950  |
| 1959 | 9 29 | 18 | 8 GRACIE    | 32.4 | 80.4 | 105 | 0    |
| 1959 | 9 30 | 0  | 8 GRACIE    | 33.6 | 81.1 | 60  | 0    |
| 1959 | 9 30 | 6  | 8 GRACIE    | 34.9 | 81.5 | 60  | 0    |
| 1959 | 9 30 | 12 | 8 GRACIE    | 36.2 | 81.7 | 45  | 0    |
| 1959 | 9 30 | 18 | 8 GRACIE    | 37.7 | 81.7 | 40  | 0    |
| 1959 | 10   | 1  | 0 8 GRACIE  | 39.3 | 81.0 | 35  | 0    |
| 1959 | 10   | 1  | 6 8 GRACIE  | 40.6 | 79.1 | 30  | 0    |
| 1959 | 10   | 1  | 12 8 GRACIE | 41.7 | 76.7 | 30  | 0    |
| 1959 | 10   | 1  | 18 8 GRACIE | 42.5 | 74.3 | 30  | 0    |
| 1959 | 10   | 2  | 0 8 GRACIE  | 42.9 | 71.6 | 25  | 0    |
| 1959 | 10   | 2  | 6 8 GRACIE  | 43.0 | 68.0 | 25  | 0    |
| 1959 | 10   | 2  | 12 8 GRACIE | 42.8 | 63.4 | 25  | 0    |
| 1959 | 10   | 2  | 18 8 GRACIE | 42.8 | 59.2 | 25  | 0    |
| 1959 | 9 27 | 12 | 9 HANNAH    | 26.8 | 49.9 | 30  | 0    |
| 1959 | 9 27 | 18 | 9 HANNAH    | 26.9 | 50.5 | 30  | 0    |
| 1959 | 9 28 | 0  | 9 HANNAH    | 26.9 | 51.2 | 35  | 0    |
| 1959 | 9 28 | 6  | 9 HANNAH    | 27.0 | 51.9 | 50  | 0    |
| 1959 | 9 28 | 12 | 9 HANNAH    | 27.0 | 52.8 | 60  | 0    |
| 1959 | 9 28 | 18 | 9 HANNAH    | 27.0 | 54.9 | 65  | 0    |
| 1959 | 9 29 | 0  | 9 HANNAH    | 27.0 | 57.3 | 70  | 0    |
| 1959 | 9 29 | 6  | 9 HANNAH    | 26.7 | 58.3 | 75  | 0    |
| 1959 | 9 29 | 12 | 9 HANNAH    | 26.3 | 59.3 | 75  | 0    |

|      |    |    |    |          |      |      |     |     |
|------|----|----|----|----------|------|------|-----|-----|
| 1959 | 9  | 29 | 18 | 9 HANNAH | 26.2 | 61.1 | 80  | 0   |
| 1959 | 9  | 30 | 0  | 9 HANNAH | 26.2 | 62.8 | 85  | 0   |
| 1959 | 9  | 30 | 6  | 9 HANNAH | 26.3 | 63.8 | 90  | 0   |
| 1959 | 9  | 30 | 12 | 9 HANNAH | 26.7 | 64.7 | 90  | 0   |
| 1959 | 9  | 30 | 18 | 9 HANNAH | 27.7 | 65.4 | 95  | 0   |
| 1959 | 10 | 1  | 0  | 9 HANNAH | 28.8 | 66.1 | 105 | 0   |
| 1959 | 10 | 1  | 6  | 9 HANNAH | 29.6 | 67.1 | 110 | 959 |
| 1959 | 10 | 1  | 12 | 9 HANNAH | 30.4 | 68.1 | 110 | 959 |
| 1959 | 10 | 1  | 18 | 9 HANNAH | 31.5 | 68.9 | 110 | 959 |
| 1959 | 10 | 2  | 0  | 9 HANNAH | 32.6 | 69.3 | 110 | 959 |
| 1959 | 10 | 2  | 6  | 9 HANNAH | 33.5 | 68.9 | 110 | 959 |
| 1959 | 10 | 2  | 12 | 9 HANNAH | 34.1 | 68.1 | 110 | 959 |
| 1959 | 10 | 2  | 18 | 9 HANNAH | 34.5 | 67.1 | 110 | 959 |
| 1959 | 10 | 3  | 0  | 9 HANNAH | 34.9 | 66.2 | 110 | 959 |
| 1959 | 10 | 3  | 6  | 9 HANNAH | 35.1 | 65.4 | 110 | 959 |
| 1959 | 10 | 3  | 12 | 9 HANNAH | 35.4 | 64.6 | 105 | 959 |
| 1959 | 10 | 3  | 18 | 9 HANNAH | 35.9 | 63.8 | 100 | 0   |
| 1959 | 10 | 4  | 0  | 9 HANNAH | 36.4 | 63.0 | 95  | 0   |
| 1959 | 10 | 4  | 6  | 9 HANNAH | 36.7 | 62.0 | 90  | 0   |
| 1959 | 10 | 4  | 12 | 9 HANNAH | 37.0 | 60.7 | 85  | 0   |
| 1959 | 10 | 4  | 18 | 9 HANNAH | 37.1 | 59.0 | 90  | 0   |
| 1959 | 10 | 5  | 0  | 9 HANNAH | 37.1 | 57.0 | 95  | 0   |
| 1959 | 10 | 5  | 6  | 9 HANNAH | 36.9 | 54.6 | 95  | 0   |
| 1959 | 10 | 5  | 12 | 9 HANNAH | 36.5 | 51.7 | 95  | 0   |
| 1959 | 10 | 5  | 18 | 9 HANNAH | 36.0 | 47.8 | 95  | 0   |
| 1959 | 10 | 6  | 0  | 9 HANNAH | 35.6 | 44.0 | 90  | 0   |
| 1959 | 10 | 6  | 6  | 9 HANNAH | 35.2 | 41.1 | 90  | 0   |
| 1959 | 10 | 6  | 12 | 9 HANNAH | 34.9 | 38.1 | 90  | 0   |
| 1959 | 10 | 6  | 18 | 9 HANNAH | 34.4 | 34.7 | 90  | 0   |
| 1959 | 10 | 7  | 0  | 9 HANNAH | 34.9 | 30.8 | 85  | 0   |
| 1959 | 10 | 7  | 6  | 9 HANNAH | 36.2 | 28.1 | 85  | 0   |
| 1959 | 10 | 7  | 12 | 9 HANNAH | 38.3 | 24.9 | 85  | 0   |
| 1959 | 10 | 7  | 18 | 9 HANNAH | 40.5 | 20.6 | 85  | 0   |
| 1959 | 10 | 8  | 0  | 9 HANNAH | 43.7 | 17.2 | 80  | 0   |
| 1959 | 10 | 8  | 6  | 9 HANNAH | 48.3 | 17.6 | 65  | 0   |
| 1959 | 10 | 8  | 12 | 9 HANNAH | 53.0 | 20.9 | 50  | 0   |
| 1959 | 10 | 8  | 18 | 9 HANNAH | 57.3 | 26.5 | 40  | 0   |
| 1959 | 10 | 6  | 18 | 10 IRENE | 23.1 | 92.3 | 25  | 0   |
| 1959 | 10 | 7  | 0  | 10 IRENE | 24.0 | 91.6 | 25  | 0   |
| 1959 | 10 | 7  | 6  | 10 IRENE | 24.9 | 90.7 | 30  | 0   |
| 1959 | 10 | 7  | 12 | 10 IRENE | 25.8 | 89.7 | 30  | 0   |
| 1959 | 10 | 7  | 18 | 10 IRENE | 27.1 | 88.9 | 35  | 0   |
| 1959 | 10 | 8  | 0  | 10 IRENE | 28.4 | 88.2 | 40  | 0   |
| 1959 | 10 | 8  | 6  | 10 IRENE | 29.3 | 87.9 | 45  | 0   |

|      |    |    |    |    |           |      |      |    |      |
|------|----|----|----|----|-----------|------|------|----|------|
| 1959 | 10 | 8  | 12 | 10 | IRENE     | 30.2 | 87.6 | 50 | 1001 |
| 1959 | 10 | 8  | 18 | 10 | IRENE     | 31.1 | 87.0 | 30 | 0    |
| 1959 | 10 | 9  | 0  | 10 | IRENE     | 32.3 | 86.1 | 25 | 0    |
| 1959 | 10 | 9  | 6  | 10 | IRENE     | 33.1 | 84.9 | 25 | 0    |
| 1959 | 10 | 17 | 12 | 11 | JUDITH    | 21.2 | 85.1 | 40 | 0    |
| 1959 | 10 | 17 | 18 | 11 | JUDITH    | 23.1 | 85.0 | 55 | 0    |
| 1959 | 10 | 18 | 0  | 11 | JUDITH    | 24.7 | 84.0 | 65 | 0    |
| 1959 | 10 | 18 | 6  | 11 | JUDITH    | 25.9 | 83.3 | 55 | 0    |
| 1959 | 10 | 18 | 12 | 11 | JUDITH    | 26.7 | 82.4 | 45 | 999  |
| 1959 | 10 | 18 | 18 | 11 | JUDITH    | 27.0 | 80.4 | 40 | 0    |
| 1959 | 10 | 19 | 0  | 11 | JUDITH    | 27.3 | 77.2 | 40 | 0    |
| 1959 | 10 | 19 | 6  | 11 | JUDITH    | 28.3 | 73.6 | 50 | 0    |
| 1959 | 10 | 19 | 12 | 11 | JUDITH    | 29.4 | 70.0 | 65 | 0    |
| 1959 | 10 | 19 | 18 | 11 | JUDITH    | 30.3 | 66.4 | 65 | 0    |
| 1959 | 10 | 20 | 0  | 11 | JUDITH    | 30.9 | 62.9 | 70 | 0    |
| 1959 | 10 | 20 | 6  | 11 | JUDITH    | 30.9 | 60.6 | 70 | 0    |
| 1959 | 10 | 20 | 12 | 11 | JUDITH    | 30.9 | 59.1 | 70 | 0    |
| 1959 | 10 | 20 | 18 | 11 | JUDITH    | 31.1 | 57.3 | 70 | 0    |
| 1959 | 10 | 21 | 0  | 11 | JUDITH    | 31.3 | 55.9 | 60 | 0    |
| 1959 | 10 | 21 | 6  | 11 | JUDITH    | 31.5 | 55.0 | 60 | 0    |
| 1959 | 10 | 21 | 12 | 11 | JUDITH    | 31.7 | 54.2 | 50 | 0    |
| 1959 | 10 | 21 | 18 | 11 | JUDITH    | 32.5 | 52.3 | 40 | 0    |
| 1960 | 6  | 22 | 6  | 1  | NOT NAMED | 19.2 | 93.6 | 15 | 0    |
| 1960 | 6  | 22 | 12 | 1  | NOT NAMED | 20.1 | 94.2 | 15 | 0    |
| 1960 | 6  | 22 | 18 | 1  | NOT NAMED | 21.2 | 94.8 | 15 | 1008 |
| 1960 | 6  | 23 | 0  | 1  | NOT NAMED | 22.3 | 95.3 | 20 | 0    |
| 1960 | 6  | 23 | 6  | 1  | NOT NAMED | 23.5 | 95.8 | 25 | 0    |
| 1960 | 6  | 23 | 12 | 1  | NOT NAMED | 24.7 | 96.3 | 35 | 1006 |
| 1960 | 6  | 23 | 18 | 1  | NOT NAMED | 25.5 | 96.7 | 40 | 0    |
| 1960 | 6  | 24 | 0  | 1  | NOT NAMED | 26.3 | 97.0 | 40 | 0    |
| 1960 | 6  | 24 | 6  | 1  | NOT NAMED | 27.3 | 97.3 | 35 | 1002 |
| 1960 | 6  | 24 | 12 | 1  | NOT NAMED | 28.4 | 97.5 | 30 | 0    |
| 1960 | 6  | 24 | 18 | 1  | NOT NAMED | 29.1 | 98.0 | 30 | 0    |
| 1960 | 6  | 25 | 0  | 1  | NOT NAMED | 29.2 | 98.8 | 30 | 0    |
| 1960 | 6  | 25 | 6  | 1  | NOT NAMED | 28.6 | 99.0 | 25 | 0    |
| 1960 | 6  | 25 | 12 | 1  | NOT NAMED | 28.3 | 98.4 | 25 | 0    |
| 1960 | 6  | 25 | 18 | 1  | NOT NAMED | 28.9 | 97.9 | 25 | 0    |
| 1960 | 6  | 26 | 0  | 1  | NOT NAMED | 29.6 | 97.2 | 20 | 0    |
| 1960 | 6  | 26 | 6  | 1  | NOT NAMED | 30.3 | 96.8 | 15 | 0    |
| 1960 | 6  | 26 | 12 | 1  | NOT NAMED | 30.8 | 96.4 | 15 | 0    |
| 1960 | 6  | 26 | 18 | 1  | NOT NAMED | 32.0 | 96.0 | 15 | 0    |
| 1960 | 6  | 27 | 0  | 1  | NOT NAMED | 33.0 | 95.6 | 15 | 0    |
| 1960 | 6  | 27 | 6  | 1  | NOT NAMED | 34.4 | 94.5 | 15 | 0    |
| 1960 | 6  | 27 | 12 | 1  | NOT NAMED | 35.7 | 93.3 | 15 | 0    |

|      |         |             |      |      |    |   |
|------|---------|-------------|------|------|----|---|
| 1960 | 6 27 18 | 1 NOT NAMED | 36.6 | 92.3 | 15 | 0 |
| 1960 | 6 28 0  | 1 NOT NAMED | 37.3 | 91.7 | 15 | 0 |
| 1960 | 6 28 6  | 1 NOT NAMED | 37.9 | 90.5 | 15 | 0 |
| 1960 | 6 28 12 | 1 NOT NAMED | 38.6 | 89.4 | 15 | 0 |
| 1960 | 6 28 18 | 1 NOT NAMED | 39.7 | 88.7 | 15 | 0 |
| 1960 | 6 29 0  | 1 NOT NAMED | 41.4 | 88.3 | 15 | 0 |
| 1960 | 7 10 0  | 2 ABBY      | 13.0 | 56.2 | 30 | 0 |
| 1960 | 7 10 6  | 2 ABBY      | 13.0 | 58.0 | 30 | 0 |
| 1960 | 7 10 12 | 2 ABBY      | 13.8 | 61.0 | 65 | 0 |
| 1960 | 7 10 18 | 2 ABBY      | 14.2 | 62.3 | 70 | 0 |
| 1960 | 7 11 0  | 2 ABBY      | 14.5 | 63.5 | 80 | 0 |
| 1960 | 7 11 6  | 2 ABBY      | 14.4 | 64.8 | 80 | 0 |
| 1960 | 7 11 12 | 2 ABBY      | 14.8 | 66.0 | 85 | 0 |
| 1960 | 7 11 18 | 2 ABBY      | 15.2 | 67.5 | 80 | 0 |
| 1960 | 7 12 0  | 2 ABBY      | 14.9 | 69.0 | 70 | 0 |
| 1960 | 7 12 6  | 2 ABBY      | 14.7 | 70.5 | 70 | 0 |
| 1960 | 7 12 12 | 2 ABBY      | 14.7 | 72.0 | 75 | 0 |
| 1960 | 7 12 18 | 2 ABBY      | 15.0 | 73.2 | 75 | 0 |
| 1960 | 7 13 0  | 2 ABBY      | 15.2 | 74.3 | 75 | 0 |
| 1960 | 7 13 6  | 2 ABBY      | 15.1 | 75.5 | 65 | 0 |
| 1960 | 7 13 12 | 2 ABBY      | 14.8 | 76.8 | 50 | 0 |
| 1960 | 7 13 18 | 2 ABBY      | 14.7 | 78.1 | 40 | 0 |
| 1960 | 7 14 0  | 2 ABBY      | 14.7 | 79.5 | 40 | 0 |
| 1960 | 7 14 6  | 2 ABBY      | 15.1 | 81.1 | 45 | 0 |
| 1960 | 7 14 12 | 2 ABBY      | 15.6 | 82.7 | 55 | 0 |
| 1960 | 7 14 18 | 2 ABBY      | 15.9 | 84.0 | 60 | 0 |
| 1960 | 7 15 0  | 2 ABBY      | 16.2 | 85.2 | 65 | 0 |
| 1960 | 7 15 6  | 2 ABBY      | 16.4 | 86.5 | 70 | 0 |
| 1960 | 7 15 12 | 2 ABBY      | 16.5 | 87.8 | 65 | 0 |
| 1960 | 7 15 18 | 2 ABBY      | 16.3 | 89.3 | 45 | 0 |
| 1960 | 7 16 0  | 2 ABBY      | 16.5 | 90.6 | 30 | 0 |
| 1960 | 7 16 6  | 2 ABBY      | 17.3 | 91.6 | 25 | 0 |
| 1960 | 7 16 12 | 2 ABBY      | 18.0 | 92.5 | 25 | 0 |
| 1960 | 7 16 18 | 2 ABBY      | 18.0 | 93.7 | 25 | 0 |
| 1960 | 7 28 18 | 3 BRENDA    | 27.0 | 86.0 | 30 | 0 |
| 1960 | 7 29 0  | 3 BRENDA    | 29.0 | 83.4 | 30 | 0 |
| 1960 | 7 29 6  | 3 BRENDA    | 30.3 | 82.5 | 30 | 0 |
| 1960 | 7 29 12 | 3 BRENDA    | 31.5 | 81.5 | 45 | 0 |
| 1960 | 7 29 18 | 3 BRENDA    | 32.9 | 79.7 | 45 | 0 |
| 1960 | 7 30 0  | 3 BRENDA    | 34.6 | 78.0 | 50 | 0 |
| 1960 | 7 30 6  | 3 BRENDA    | 37.0 | 76.3 | 45 | 0 |
| 1960 | 7 30 12 | 3 BRENDA    | 39.5 | 74.8 | 45 | 0 |
| 1960 | 7 30 18 | 3 BRENDA    | 41.6 | 73.0 | 45 | 0 |
| 1960 | 7 31 0  | 3 BRENDA    | 43.9 | 71.1 | 40 | 0 |

|      |   |    |    |   |        |      |      |     |     |
|------|---|----|----|---|--------|------|------|-----|-----|
| 1960 | 7 | 31 | 6  | 3 | BRENDA | 47.0 | 69.8 | 35  | 0   |
| 1960 | 7 | 31 | 12 | 3 | BRENDA | 50.5 | 69.0 | 30  | 0   |
| 1960 | 7 | 31 | 18 | 3 | BRENDA | 54.1 | 69.0 | 30  | 0   |
| 1960 | 8 | 1  | 0  | 3 | BRENDA | 57.8 | 68.9 | 30  | 0   |
| 1960 | 8 | 17 | 18 | 4 | CLEO   | 24.4 | 75.5 | 35  | 0   |
| 1960 | 8 | 18 | 0  | 4 | CLEO   | 25.1 | 74.5 | 40  | 0   |
| 1960 | 8 | 18 | 6  | 4 | CLEO   | 25.9 | 73.4 | 55  | 0   |
| 1960 | 8 | 18 | 12 | 4 | CLEO   | 26.7 | 72.7 | 60  | 0   |
| 1960 | 8 | 18 | 18 | 4 | CLEO   | 27.8 | 71.8 | 65  | 0   |
| 1960 | 8 | 19 | 0  | 4 | CLEO   | 29.3 | 71.0 | 70  | 0   |
| 1960 | 8 | 19 | 6  | 4 | CLEO   | 31.0 | 70.2 | 75  | 0   |
| 1960 | 8 | 19 | 12 | 4 | CLEO   | 33.1 | 69.4 | 75  | 0   |
| 1960 | 8 | 19 | 18 | 4 | CLEO   | 35.4 | 68.6 | 75  | 0   |
| 1960 | 8 | 20 | 0  | 4 | CLEO   | 37.7 | 67.8 | 80  | 0   |
| 1960 | 8 | 20 | 6  | 4 | CLEO   | 40.0 | 66.8 | 80  | 0   |
| 1960 | 8 | 20 | 12 | 4 | CLEO   | 42.2 | 65.4 | 60  | 0   |
| 1960 | 8 | 20 | 18 | 4 | CLEO   | 43.6 | 63.4 | 55  | 0   |
| 1960 | 8 | 21 | 0  | 4 | CLEO   | 44.2 | 60.5 | 35  | 0   |
| 1960 | 8 | 21 | 6  | 4 | CLEO   | 44.4 | 58.0 | 30  | 0   |
| 1960 | 8 | 29 | 18 | 5 | DONNA  | 10.2 | 21.5 | 25  | 0   |
| 1960 | 8 | 30 | 0  | 5 | DONNA  | 10.1 | 24.2 | 25  | 0   |
| 1960 | 8 | 30 | 6  | 5 | DONNA  | 10.2 | 25.5 | 30  | 0   |
| 1960 | 8 | 30 | 12 | 5 | DONNA  | 10.3 | 26.9 | 35  | 0   |
| 1960 | 8 | 30 | 18 | 5 | DONNA  | 10.5 | 28.4 | 35  | 0   |
| 1960 | 8 | 31 | 0  | 5 | DONNA  | 10.8 | 30.0 | 35  | 0   |
| 1960 | 8 | 31 | 6  | 5 | DONNA  | 10.9 | 31.6 | 35  | 0   |
| 1960 | 8 | 31 | 12 | 5 | DONNA  | 11.0 | 33.1 | 35  | 0   |
| 1960 | 8 | 31 | 18 | 5 | DONNA  | 11.4 | 34.6 | 35  | 0   |
| 1960 | 9 | 1  | 0  | 5 | DONNA  | 11.8 | 36.2 | 40  | 0   |
| 1960 | 9 | 1  | 6  | 5 | DONNA  | 12.0 | 37.8 | 50  | 0   |
| 1960 | 9 | 1  | 12 | 5 | DONNA  | 12.2 | 39.4 | 65  | 990 |
| 1960 | 9 | 1  | 18 | 5 | DONNA  | 12.6 | 41.1 | 80  | 0   |
| 1960 | 9 | 2  | 0  | 5 | DONNA  | 12.9 | 42.8 | 95  | 0   |
| 1960 | 9 | 2  | 6  | 5 | DONNA  | 13.3 | 44.3 | 105 | 0   |
| 1960 | 9 | 2  | 12 | 5 | DONNA  | 13.6 | 45.8 | 115 | 980 |
| 1960 | 9 | 2  | 18 | 5 | DONNA  | 13.9 | 47.6 | 120 | 973 |
| 1960 | 9 | 3  | 0  | 5 | DONNA  | 14.3 | 49.4 | 125 | 0   |
| 1960 | 9 | 3  | 6  | 5 | DONNA  | 14.7 | 51.2 | 130 | 0   |
| 1960 | 9 | 3  | 12 | 5 | DONNA  | 15.2 | 52.9 | 130 | 965 |
| 1960 | 9 | 3  | 18 | 5 | DONNA  | 15.6 | 54.6 | 135 | 947 |
| 1960 | 9 | 4  | 0  | 5 | DONNA  | 16.0 | 56.3 | 135 | 0   |
| 1960 | 9 | 4  | 6  | 5 | DONNA  | 16.4 | 58.0 | 140 | 0   |
| 1960 | 9 | 4  | 12 | 5 | DONNA  | 16.8 | 59.5 | 140 | 952 |
| 1960 | 9 | 4  | 18 | 5 | DONNA  | 17.2 | 60.8 | 135 | 0   |

|      |   |    |    |   |       |      |      |     |     |
|------|---|----|----|---|-------|------|------|-----|-----|
| 1960 | 9 | 5  | 0  | 5 | DONNA | 17.7 | 62.0 | 130 | 0   |
| 1960 | 9 | 5  | 6  | 5 | DONNA | 18.4 | 63.4 | 120 | 0   |
| 1960 | 9 | 5  | 12 | 5 | DONNA | 19.1 | 64.7 | 115 | 958 |
| 1960 | 9 | 5  | 18 | 5 | DONNA | 19.7 | 65.7 | 110 | 0   |
| 1960 | 9 | 6  | 0  | 5 | DONNA | 20.3 | 66.5 | 110 | 0   |
| 1960 | 9 | 6  | 6  | 5 | DONNA | 20.8 | 67.3 | 110 | 0   |
| 1960 | 9 | 6  | 12 | 5 | DONNA | 21.2 | 68.1 | 110 | 940 |
| 1960 | 9 | 6  | 18 | 5 | DONNA | 21.5 | 68.9 | 115 | 0   |
| 1960 | 9 | 7  | 0  | 5 | DONNA | 21.8 | 69.7 | 120 | 0   |
| 1960 | 9 | 7  | 6  | 5 | DONNA | 22.0 | 70.5 | 120 | 0   |
| 1960 | 9 | 7  | 12 | 5 | DONNA | 22.1 | 71.3 | 125 | 945 |
| 1960 | 9 | 7  | 18 | 5 | DONNA | 22.1 | 72.2 | 125 | 0   |
| 1960 | 9 | 8  | 0  | 5 | DONNA | 22.2 | 73.2 | 130 | 0   |
| 1960 | 9 | 8  | 6  | 5 | DONNA | 22.3 | 74.3 | 130 | 0   |
| 1960 | 9 | 8  | 12 | 5 | DONNA | 22.3 | 75.3 | 130 | 948 |
| 1960 | 9 | 8  | 18 | 5 | DONNA | 22.4 | 76.1 | 130 | 944 |
| 1960 | 9 | 9  | 0  | 5 | DONNA | 22.4 | 76.9 | 130 | 948 |
| 1960 | 9 | 9  | 6  | 5 | DONNA | 22.7 | 77.8 | 130 | 940 |
| 1960 | 9 | 9  | 12 | 5 | DONNA | 23.2 | 78.7 | 130 | 934 |
| 1960 | 9 | 9  | 18 | 5 | DONNA | 23.7 | 79.4 | 125 | 939 |
| 1960 | 9 | 10 | 0  | 5 | DONNA | 24.2 | 80.1 | 120 | 932 |
| 1960 | 9 | 10 | 6  | 5 | DONNA | 24.7 | 80.7 | 115 | 932 |
| 1960 | 9 | 10 | 12 | 5 | DONNA | 25.3 | 81.3 | 120 | 938 |
| 1960 | 9 | 10 | 18 | 5 | DONNA | 26.2 | 81.7 | 115 | 950 |
| 1960 | 9 | 11 | 0  | 5 | DONNA | 27.3 | 81.9 | 105 | 960 |
| 1960 | 9 | 11 | 6  | 5 | DONNA | 28.5 | 81.7 | 100 | 969 |
| 1960 | 9 | 11 | 12 | 5 | DONNA | 29.9 | 80.8 | 90  | 970 |
| 1960 | 9 | 11 | 18 | 5 | DONNA | 31.4 | 79.5 | 90  | 966 |
| 1960 | 9 | 12 | 0  | 5 | DONNA | 33.1 | 78.0 | 95  | 958 |
| 1960 | 9 | 12 | 6  | 5 | DONNA | 35.0 | 76.9 | 90  | 0   |
| 1960 | 9 | 12 | 12 | 5 | DONNA | 37.3 | 74.8 | 95  | 965 |
| 1960 | 9 | 12 | 18 | 5 | DONNA | 40.0 | 73.1 | 90  | 0   |
| 1960 | 9 | 13 | 0  | 5 | DONNA | 43.1 | 71.2 | 75  | 0   |
| 1960 | 9 | 13 | 6  | 5 | DONNA | 46.6 | 68.9 | 60  | 0   |
| 1960 | 9 | 13 | 12 | 5 | DONNA | 50.0 | 66.0 | 55  | 0   |
| 1960 | 9 | 13 | 18 | 5 | DONNA | 53.1 | 62.5 | 45  | 0   |
| 1960 | 9 | 14 | 0  | 5 | DONNA | 56.0 | 58.2 | 35  | 0   |
| 1960 | 9 | 14 | 12 | 6 | ETHEL | 23.9 | 90.6 | 40  | 0   |
| 1960 | 9 | 14 | 18 | 6 | ETHEL | 25.6 | 89.7 | 75  | 0   |
| 1960 | 9 | 15 | 0  | 6 | ETHEL | 27.0 | 89.1 | 110 | 981 |
| 1960 | 9 | 15 | 6  | 6 | ETHEL | 28.1 | 88.9 | 140 | 0   |
| 1960 | 9 | 15 | 12 | 6 | ETHEL | 29.1 | 88.9 | 80  | 0   |
| 1960 | 9 | 15 | 18 | 6 | ETHEL | 29.9 | 89.0 | 60  | 0   |
| 1960 | 9 | 16 | 0  | 6 | ETHEL | 30.7 | 89.0 | 45  | 0   |

|      |         |   |            |      |      |    |   |
|------|---------|---|------------|------|------|----|---|
| 1960 | 9 16    | 6 | 6 ETHEL    | 31.3 | 89.0 | 35 | 0 |
| 1960 | 9 16 12 | 6 | ETHEL      | 32.0 | 88.9 | 35 | 0 |
| 1960 | 9 16 18 | 6 | ETHEL      | 32.9 | 88.5 | 30 | 0 |
| 1960 | 9 17    | 0 | 6 ETHEL    | 33.9 | 88.1 | 25 | 0 |
| 1960 | 9 17    | 6 | 6 ETHEL    | 35.0 | 88.0 | 20 | 0 |
| 1960 | 9 17 12 | 6 | ETHEL      | 36.0 | 87.6 | 15 | 0 |
| 1960 | 9 17 18 | 6 | ETHEL      | 36.8 | 87.0 | 15 | 0 |
| 1960 | 9 17    | 6 | 7 FLORENCE | 20.9 | 64.0 | 25 | 0 |
| 1960 | 9 17 12 | 7 | FLORENCE   | 21.1 | 64.8 | 25 | 0 |
| 1960 | 9 17 18 | 7 | FLORENCE   | 21.2 | 65.8 | 25 | 0 |
| 1960 | 9 18    | 0 | 7 FLORENCE | 21.2 | 66.8 | 35 | 0 |
| 1960 | 9 18    | 6 | 7 FLORENCE | 21.0 | 67.9 | 35 | 0 |
| 1960 | 9 18 12 | 7 | FLORENCE   | 20.9 | 69.0 | 35 | 0 |
| 1960 | 9 18 18 | 7 | FLORENCE   | 20.9 | 70.2 | 40 | 0 |
| 1960 | 9 19    | 0 | 7 FLORENCE | 20.9 | 71.3 | 35 | 0 |
| 1960 | 9 19    | 6 | 7 FLORENCE | 21.0 | 72.4 | 35 | 0 |
| 1960 | 9 19 12 | 7 | FLORENCE   | 21.1 | 73.8 | 35 | 0 |
| 1960 | 9 19 18 | 7 | FLORENCE   | 21.5 | 74.5 | 30 | 0 |
| 1960 | 9 20    | 0 | 7 FLORENCE | 22.0 | 75.4 | 30 | 0 |
| 1960 | 9 20    | 6 | 7 FLORENCE | 22.6 | 76.5 | 25 | 0 |
| 1960 | 9 20 12 | 7 | FLORENCE   | 23.2 | 77.6 | 25 | 0 |
| 1960 | 9 20 18 | 7 | FLORENCE   | 23.5 | 78.6 | 25 | 0 |
| 1960 | 9 21    | 0 | 7 FLORENCE | 23.7 | 79.6 | 25 | 0 |
| 1960 | 9 21    | 6 | 7 FLORENCE | 23.6 | 80.6 | 25 | 0 |
| 1960 | 9 21 12 | 7 | FLORENCE   | 23.5 | 81.6 | 25 | 0 |
| 1960 | 9 21 18 | 7 | FLORENCE   | 23.2 | 82.6 | 25 | 0 |
| 1960 | 9 22    | 0 | 7 FLORENCE | 22.7 | 83.6 | 25 | 0 |
| 1960 | 9 22    | 6 | 7 FLORENCE | 22.1 | 84.3 | 25 | 0 |
| 1960 | 9 22 12 | 7 | FLORENCE   | 22.0 | 83.4 | 25 | 0 |
| 1960 | 9 22 18 | 7 | FLORENCE   | 22.7 | 83.1 | 25 | 0 |
| 1960 | 9 23    | 0 | 7 FLORENCE | 23.6 | 82.7 | 25 | 0 |
| 1960 | 9 23    | 6 | 7 FLORENCE | 24.4 | 82.2 | 25 | 0 |
| 1960 | 9 23 12 | 7 | FLORENCE   | 25.1 | 81.6 | 25 | 0 |
| 1960 | 9 23 18 | 7 | FLORENCE   | 25.9 | 81.1 | 25 | 0 |
| 1960 | 9 24    | 0 | 7 FLORENCE | 26.7 | 80.5 | 25 | 0 |
| 1960 | 9 24    | 6 | 7 FLORENCE | 27.3 | 80.3 | 25 | 0 |
| 1960 | 9 24 12 | 7 | FLORENCE   | 27.5 | 80.5 | 25 | 0 |
| 1960 | 9 24 18 | 7 | FLORENCE   | 27.6 | 81.0 | 25 | 0 |
| 1960 | 9 25    | 0 | 7 FLORENCE | 27.7 | 81.8 | 25 | 0 |
| 1960 | 9 25    | 6 | 7 FLORENCE | 27.8 | 82.9 | 20 | 0 |
| 1960 | 9 25 12 | 7 | FLORENCE   | 27.9 | 83.9 | 15 | 0 |
| 1960 | 9 25 18 | 7 | FLORENCE   | 28.3 | 84.8 | 15 | 0 |
| 1960 | 9 26    | 0 | 7 FLORENCE | 28.9 | 85.6 | 15 | 0 |
| 1960 | 9 26    | 6 | 7 FLORENCE | 29.5 | 86.4 | 15 | 0 |

|      |         |            |      |      |     |      |
|------|---------|------------|------|------|-----|------|
| 1960 | 9 26 12 | 7 FLORENCE | 30.1 | 87.1 | 15  | 0    |
| 1960 | 9 26 18 | 7 FLORENCE | 30.8 | 87.7 | 15  | 0    |
| 1960 | 9 27 0  | 7 FLORENCE | 31.8 | 88.5 | 15  | 0    |
| 1960 | 9 27 6  | 7 FLORENCE | 32.5 | 89.0 | 15  | 0    |
| 1961 | 7 20 0  | 1 ANNA     | 11.5 | 60.2 | 35  | 0    |
| 1961 | 7 20 6  | 1 ANNA     | 11.7 | 62.0 | 45  | 1002 |
| 1961 | 7 20 12 | 1 ANNA     | 11.9 | 63.8 | 60  | 999  |
| 1961 | 7 20 18 | 1 ANNA     | 12.4 | 65.7 | 70  | 0    |
| 1961 | 7 21 0  | 1 ANNA     | 13.0 | 67.2 | 80  | 1002 |
| 1961 | 7 21 6  | 1 ANNA     | 13.2 | 69.5 | 90  | 992  |
| 1961 | 7 21 12 | 1 ANNA     | 13.4 | 71.5 | 95  | 0    |
| 1961 | 7 21 18 | 1 ANNA     | 13.7 | 73.3 | 100 | 0    |
| 1961 | 7 22 0  | 1 ANNA     | 13.7 | 74.7 | 100 | 984  |
| 1961 | 7 22 6  | 1 ANNA     | 14.0 | 76.6 | 100 | 982  |
| 1961 | 7 22 12 | 1 ANNA     | 14.5 | 78.2 | 100 | 976  |
| 1961 | 7 22 18 | 1 ANNA     | 15.2 | 79.7 | 100 | 0    |
| 1961 | 7 23 0  | 1 ANNA     | 15.2 | 81.4 | 100 | 990  |
| 1961 | 7 23 6  | 1 ANNA     | 15.3 | 82.9 | 95  | 0    |
| 1961 | 7 23 12 | 1 ANNA     | 15.8 | 84.3 | 90  | 992  |
| 1961 | 7 23 18 | 1 ANNA     | 16.0 | 85.7 | 90  | 0    |
| 1961 | 7 24 0  | 1 ANNA     | 16.1 | 86.4 | 85  | 989  |
| 1961 | 7 24 6  | 1 ANNA     | 16.3 | 87.5 | 80  | 0    |
| 1961 | 7 24 12 | 1 ANNA     | 16.6 | 88.3 | 70  | 0    |
| 1961 | 7 24 18 | 1 ANNA     | 16.9 | 89.1 | 60  | 0    |
| 1961 | 9 2 6   | 2 BETSY    | 13.3 | 41.7 | 40  | 0    |
| 1961 | 9 2 12  | 2 BETSY    | 13.8 | 42.8 | 40  | 0    |
| 1961 | 9 2 18  | 2 BETSY    | 14.3 | 43.6 | 40  | 0    |
| 1961 | 9 3 0   | 2 BETSY    | 14.8 | 44.5 | 45  | 0    |
| 1961 | 9 3 6   | 2 BETSY    | 15.2 | 45.6 | 50  | 0    |
| 1961 | 9 3 12  | 2 BETSY    | 15.9 | 46.7 | 65  | 0    |
| 1961 | 9 3 18  | 2 BETSY    | 17.0 | 48.1 | 80  | 973  |
| 1961 | 9 4 0   | 2 BETSY    | 18.2 | 49.1 | 85  | 989  |
| 1961 | 9 4 6   | 2 BETSY    | 19.5 | 49.8 | 90  | 0    |
| 1961 | 9 4 12  | 2 BETSY    | 20.5 | 50.2 | 95  | 986  |
| 1961 | 9 4 18  | 2 BETSY    | 22.0 | 50.2 | 100 | 982  |
| 1961 | 9 5 0   | 2 BETSY    | 23.2 | 50.6 | 105 | 0    |
| 1961 | 9 5 6   | 2 BETSY    | 24.5 | 51.4 | 110 | 0    |
| 1961 | 9 5 12  | 2 BETSY    | 25.6 | 52.3 | 115 | 957  |
| 1961 | 9 5 18  | 2 BETSY    | 26.9 | 52.9 | 120 | 952  |
| 1961 | 9 6 0   | 2 BETSY    | 28.5 | 54.1 | 120 | 0    |
| 1961 | 9 6 6   | 2 BETSY    | 29.9 | 55.1 | 120 | 950  |
| 1961 | 9 6 12  | 2 BETSY    | 30.9 | 56.1 | 120 | 945  |
| 1961 | 9 6 18  | 2 BETSY    | 32.4 | 56.8 | 115 | 954  |
| 1961 | 9 7 0   | 2 BETSY    | 33.1 | 57.2 | 105 | 0    |



|      |   |    |    |   |       |      |      |     |      |
|------|---|----|----|---|-------|------|------|-----|------|
| 1961 | 9 | 7  | 6  | 2 | BETSY | 33.7 | 57.8 | 100 | 0    |
| 1961 | 9 | 7  | 12 | 2 | BETSY | 34.2 | 58.3 | 95  | 954  |
| 1961 | 9 | 7  | 18 | 2 | BETSY | 34.6 | 58.7 | 90  | 0    |
| 1961 | 9 | 8  | 0  | 2 | BETSY | 35.0 | 59.0 | 90  | 0    |
| 1961 | 9 | 8  | 6  | 2 | BETSY | 35.3 | 59.7 | 90  | 0    |
| 1961 | 9 | 8  | 12 | 2 | BETSY | 35.6 | 60.0 | 90  | 0    |
| 1961 | 9 | 8  | 18 | 2 | BETSY | 35.9 | 59.9 | 90  | 0    |
| 1961 | 9 | 9  | 0  | 2 | BETSY | 36.1 | 59.6 | 90  | 0    |
| 1961 | 9 | 9  | 6  | 2 | BETSY | 36.2 | 59.3 | 90  | 0    |
| 1961 | 9 | 9  | 12 | 2 | BETSY | 36.6 | 58.6 | 90  | 978  |
| 1961 | 9 | 9  | 18 | 2 | BETSY | 37.6 | 57.9 | 90  | 976  |
| 1961 | 9 | 10 | 0  | 2 | BETSY | 38.8 | 56.1 | 90  | 0    |
| 1961 | 9 | 10 | 6  | 2 | BETSY | 38.8 | 54.4 | 90  | 0    |
| 1961 | 9 | 10 | 12 | 2 | BETSY | 39.2 | 52.3 | 90  | 980  |
| 1961 | 9 | 10 | 18 | 2 | BETSY | 39.8 | 49.7 | 85  | 962  |
| 1961 | 9 | 11 | 0  | 2 | BETSY | 40.9 | 45.8 | 85  | 0    |
| 1961 | 9 | 11 | 6  | 2 | BETSY | 42.8 | 41.2 | 80  | 0    |
| 1961 | 9 | 11 | 12 | 2 | BETSY | 44.7 | 38.5 | 80  | 970  |
| 1961 | 9 | 11 | 18 | 2 | BETSY | 47.7 | 33.0 | 75  | 0    |
| 1961 | 9 | 12 | 0  | 2 | BETSY | 50.8 | 26.5 | 70  | 0    |
| 1961 | 9 | 12 | 6  | 2 | BETSY | 54.8 | 20.5 | 60  | 0    |
| 1961 | 9 | 3  | 12 | 3 | CARLA | 12.5 | 77.0 | 25  | 0    |
| 1961 | 9 | 3  | 18 | 3 | CARLA | 12.9 | 78.0 | 25  | 0    |
| 1961 | 9 | 4  | 0  | 3 | CARLA | 13.3 | 78.8 | 25  | 0    |
| 1961 | 9 | 4  | 6  | 3 | CARLA | 13.7 | 79.5 | 25  | 1007 |
| 1961 | 9 | 4  | 12 | 3 | CARLA | 14.2 | 80.1 | 25  | 1006 |
| 1961 | 9 | 4  | 18 | 3 | CARLA | 14.9 | 80.7 | 25  | 1005 |
| 1961 | 9 | 5  | 0  | 3 | CARLA | 15.5 | 81.4 | 30  | 1002 |
| 1961 | 9 | 5  | 6  | 3 | CARLA | 15.9 | 82.1 | 30  | 999  |
| 1961 | 9 | 5  | 12 | 3 | CARLA | 16.3 | 82.7 | 40  | 997  |
| 1961 | 9 | 5  | 18 | 3 | CARLA | 16.9 | 83.1 | 45  | 993  |
| 1961 | 9 | 6  | 0  | 3 | CARLA | 17.4 | 83.6 | 50  | 990  |
| 1961 | 9 | 6  | 6  | 3 | CARLA | 18.1 | 84.3 | 55  | 987  |
| 1961 | 9 | 6  | 12 | 3 | CARLA | 18.8 | 85.1 | 65  | 984  |
| 1961 | 9 | 6  | 18 | 3 | CARLA | 19.1 | 85.6 | 70  | 981  |
| 1961 | 9 | 7  | 0  | 3 | CARLA | 19.5 | 85.9 | 75  | 978  |
| 1961 | 9 | 7  | 6  | 3 | CARLA | 20.2 | 86.0 | 80  | 975  |
| 1961 | 9 | 7  | 12 | 3 | CARLA | 20.9 | 86.0 | 85  | 973  |
| 1961 | 9 | 7  | 18 | 3 | CARLA | 21.7 | 86.3 | 95  | 970  |
| 1961 | 9 | 8  | 0  | 3 | CARLA | 22.3 | 87.3 | 100 | 968  |
| 1961 | 9 | 8  | 6  | 3 | CARLA | 22.8 | 87.8 | 105 | 966  |
| 1961 | 9 | 8  | 12 | 3 | CARLA | 23.1 | 88.3 | 110 | 965  |
| 1961 | 9 | 8  | 18 | 3 | CARLA | 23.4 | 89.2 | 110 | 962  |
| 1961 | 9 | 9  | 0  | 3 | CARLA | 23.7 | 89.8 | 110 | 959  |

|      |   |    |    |   |        |      |      |     |     |
|------|---|----|----|---|--------|------|------|-----|-----|
| 1961 | 9 | 9  | 6  | 3 | CARLA  | 24.0 | 90.2 | 110 | 956 |
| 1961 | 9 | 9  | 12 | 3 | CARLA  | 24.6 | 91.0 | 110 | 953 |
| 1961 | 9 | 9  | 18 | 3 | CARLA  | 24.9 | 91.8 | 110 | 948 |
| 1961 | 9 | 10 | 0  | 3 | CARLA  | 25.6 | 92.6 | 110 | 944 |
| 1961 | 9 | 10 | 6  | 3 | CARLA  | 26.1 | 93.3 | 115 | 940 |
| 1961 | 9 | 10 | 12 | 3 | CARLA  | 26.3 | 93.9 | 120 | 937 |
| 1961 | 9 | 10 | 18 | 3 | CARLA  | 26.7 | 94.5 | 130 | 936 |
| 1961 | 9 | 11 | 0  | 3 | CARLA  | 27.0 | 95.0 | 140 | 936 |
| 1961 | 9 | 11 | 6  | 3 | CARLA  | 27.2 | 95.7 | 150 | 936 |
| 1961 | 9 | 11 | 12 | 3 | CARLA  | 27.6 | 96.2 | 145 | 935 |
| 1961 | 9 | 11 | 18 | 3 | CARLA  | 28.0 | 96.4 | 125 | 931 |
| 1961 | 9 | 12 | 0  | 3 | CARLA  | 28.6 | 96.8 | 100 | 940 |
| 1961 | 9 | 12 | 6  | 3 | CARLA  | 29.5 | 97.2 | 80  | 955 |
| 1961 | 9 | 12 | 12 | 3 | CARLA  | 30.5 | 97.4 | 60  | 975 |
| 1961 | 9 | 12 | 18 | 3 | CARLA  | 31.8 | 97.4 | 45  | 979 |
| 1961 | 9 | 13 | 0  | 3 | CARLA  | 32.8 | 97.2 | 40  | 980 |
| 1961 | 9 | 13 | 6  | 3 | CARLA  | 33.5 | 97.0 | 35  | 0   |
| 1961 | 9 | 13 | 12 | 3 | CARLA  | 34.3 | 96.8 | 30  | 0   |
| 1961 | 9 | 13 | 18 | 3 | CARLA  | 36.2 | 94.0 | 30  | 0   |
| 1961 | 9 | 14 | 0  | 3 | CARLA  | 38.0 | 90.5 | 30  | 0   |
| 1961 | 9 | 14 | 6  | 3 | CARLA  | 42.1 | 87.1 | 30  | 0   |
| 1961 | 9 | 14 | 12 | 3 | CARLA  | 46.3 | 83.8 | 30  | 0   |
| 1961 | 9 | 14 | 18 | 3 | CARLA  | 47.5 | 80.7 | 30  | 0   |
| 1961 | 9 | 15 | 0  | 3 | CARLA  | 48.7 | 78.0 | 30  | 0   |
| 1961 | 9 | 15 | 6  | 3 | CARLA  | 51.2 | 72.7 | 30  | 0   |
| 1961 | 9 | 15 | 12 | 3 | CARLA  | 53.7 | 67.5 | 30  | 0   |
| 1961 | 9 | 15 | 18 | 3 | CARLA  | 56.8 | 66.2 | 30  | 0   |
| 1961 | 9 | 16 | 0  | 3 | CARLA  | 60.0 | 65.0 | 30  | 0   |
| 1961 | 9 | 6  | 18 | 4 | DEBBIE | 15.1 | 24.1 | 50  | 0   |
| 1961 | 9 | 7  | 0  | 4 | DEBBIE | 15.2 | 25.4 | 65  | 0   |
| 1961 | 9 | 7  | 6  | 4 | DEBBIE | 15.4 | 26.7 | 70  | 0   |
| 1961 | 9 | 7  | 12 | 4 | DEBBIE | 15.7 | 28.1 | 70  | 0   |
| 1961 | 9 | 7  | 18 | 4 | DEBBIE | 16.1 | 29.4 | 70  | 0   |
| 1961 | 9 | 8  | 0  | 4 | DEBBIE | 16.5 | 30.7 | 70  | 0   |
| 1961 | 9 | 8  | 6  | 4 | DEBBIE | 17.0 | 32.0 | 70  | 0   |
| 1961 | 9 | 8  | 12 | 4 | DEBBIE | 17.5 | 33.2 | 70  | 0   |
| 1961 | 9 | 8  | 18 | 4 | DEBBIE | 18.0 | 34.5 | 70  | 0   |
| 1961 | 9 | 9  | 0  | 4 | DEBBIE | 18.5 | 35.7 | 70  | 0   |
| 1961 | 9 | 9  | 6  | 4 | DEBBIE | 19.1 | 37.0 | 70  | 0   |
| 1961 | 9 | 9  | 12 | 4 | DEBBIE | 19.7 | 38.2 | 70  | 0   |
| 1961 | 9 | 9  | 18 | 4 | DEBBIE | 20.4 | 39.4 | 70  | 0   |
| 1961 | 9 | 10 | 0  | 4 | DEBBIE | 21.2 | 40.6 | 70  | 0   |
| 1961 | 9 | 10 | 6  | 4 | DEBBIE | 22.0 | 41.8 | 70  | 0   |
| 1961 | 9 | 10 | 12 | 4 | DEBBIE | 22.8 | 43.0 | 75  | 0   |

|      |         |   |        |      |      |     |     |
|------|---------|---|--------|------|------|-----|-----|
| 1961 | 9 10 18 | 4 | DEBBIE | 23.8 | 44.1 | 75  | 0   |
| 1961 | 9 11 0  | 4 | DEBBIE | 25.0 | 45.0 | 80  | 0   |
| 1961 | 9 11 6  | 4 | DEBBIE | 26.6 | 45.7 | 90  | 0   |
| 1961 | 9 11 12 | 4 | DEBBIE | 27.9 | 45.9 | 100 | 976 |
| 1961 | 9 11 18 | 4 | DEBBIE | 29.3 | 45.9 | 105 | 0   |
| 1961 | 9 12 0  | 4 | DEBBIE | 30.5 | 45.9 | 105 | 0   |
| 1961 | 9 12 6  | 4 | DEBBIE | 31.5 | 45.9 | 105 | 0   |
| 1961 | 9 12 12 | 4 | DEBBIE | 32.2 | 45.8 | 105 | 975 |
| 1961 | 9 12 18 | 4 | DEBBIE | 33.0 | 45.6 | 105 | 0   |
| 1961 | 9 13 0  | 4 | DEBBIE | 33.9 | 45.3 | 100 | 0   |
| 1961 | 9 13 6  | 4 | DEBBIE | 34.7 | 45.1 | 85  | 980 |
| 1961 | 9 13 12 | 4 | DEBBIE | 35.2 | 44.2 | 75  | 0   |
| 1961 | 9 13 18 | 4 | DEBBIE | 35.5 | 43.1 | 70  | 0   |
| 1961 | 9 14 0  | 4 | DEBBIE | 35.9 | 41.1 | 70  | 0   |
| 1961 | 9 14 6  | 4 | DEBBIE | 36.2 | 38.9 | 70  | 0   |
| 1961 | 9 14 12 | 4 | DEBBIE | 36.6 | 36.5 | 70  | 0   |
| 1961 | 9 14 18 | 4 | DEBBIE | 37.0 | 34.1 | 70  | 0   |
| 1961 | 9 15 0  | 4 | DEBBIE | 37.8 | 31.0 | 70  | 0   |
| 1961 | 9 15 6  | 4 | DEBBIE | 39.5 | 26.4 | 70  | 0   |
| 1961 | 9 15 12 | 4 | DEBBIE | 41.7 | 22.2 | 70  | 0   |
| 1961 | 9 15 18 | 4 | DEBBIE | 44.6 | 18.2 | 70  | 0   |
| 1961 | 9 16 0  | 4 | DEBBIE | 48.0 | 14.8 | 70  | 0   |
| 1961 | 9 16 6  | 4 | DEBBIE | 51.9 | 11.6 | 70  | 970 |
| 1961 | 9 16 12 | 4 | DEBBIE | 55.7 | 8.5  | 70  | 0   |
| 1961 | 9 10 18 | 5 | ESTHER | 11.7 | 32.1 | 25  | 0   |
| 1961 | 9 11 0  | 5 | ESTHER | 12.4 | 33.9 | 25  | 0   |
| 1961 | 9 11 6  | 5 | ESTHER | 13.5 | 35.3 | 25  | 0   |
| 1961 | 9 11 12 | 5 | ESTHER | 14.4 | 36.7 | 35  | 0   |
| 1961 | 9 11 18 | 5 | ESTHER | 15.2 | 38.1 | 40  | 0   |
| 1961 | 9 12 0  | 5 | ESTHER | 16.0 | 39.4 | 50  | 0   |
| 1961 | 9 12 6  | 5 | ESTHER | 16.8 | 40.8 | 65  | 0   |
| 1961 | 9 12 12 | 5 | ESTHER | 17.6 | 42.0 | 65  | 975 |
| 1961 | 9 12 18 | 5 | ESTHER | 18.4 | 43.1 | 70  | 967 |
| 1961 | 9 13 0  | 5 | ESTHER | 19.1 | 44.2 | 75  | 0   |
| 1961 | 9 13 6  | 5 | ESTHER | 19.6 | 45.3 | 90  | 969 |
| 1961 | 9 13 12 | 5 | ESTHER | 19.8 | 46.4 | 105 | 970 |
| 1961 | 9 13 18 | 5 | ESTHER | 20.0 | 47.4 | 110 | 983 |
| 1961 | 9 14 0  | 5 | ESTHER | 20.1 | 48.4 | 110 | 0   |
| 1961 | 9 14 6  | 5 | ESTHER | 20.2 | 49.4 | 110 | 0   |
| 1961 | 9 14 12 | 5 | ESTHER | 20.3 | 50.5 | 110 | 975 |
| 1961 | 9 14 18 | 5 | ESTHER | 20.5 | 51.3 | 110 | 966 |
| 1961 | 9 15 0  | 5 | ESTHER | 20.7 | 52.1 | 110 | 965 |
| 1961 | 9 15 6  | 5 | ESTHER | 21.1 | 53.4 | 110 | 965 |
| 1961 | 9 15 12 | 5 | ESTHER | 21.6 | 54.7 | 110 | 966 |

|      |         |          |      |      |     |      |
|------|---------|----------|------|------|-----|------|
| 1961 | 9 15 18 | 5 ESTHER | 21.8 | 56.1 | 110 | 961  |
| 1961 | 9 16 0  | 5 ESTHER | 22.0 | 57.4 | 110 | 960  |
| 1961 | 9 16 6  | 5 ESTHER | 22.3 | 58.7 | 105 | 956  |
| 1961 | 9 16 12 | 5 ESTHER | 22.7 | 60.0 | 105 | 949  |
| 1961 | 9 16 18 | 5 ESTHER | 23.3 | 61.3 | 105 | 944  |
| 1961 | 9 17 0  | 5 ESTHER | 23.8 | 62.6 | 105 | 939  |
| 1961 | 9 17 6  | 5 ESTHER | 24.1 | 63.9 | 110 | 934  |
| 1961 | 9 17 12 | 5 ESTHER | 24.4 | 65.2 | 110 | 930  |
| 1961 | 9 17 18 | 5 ESTHER | 24.8 | 66.2 | 115 | 927  |
| 1961 | 9 18 0  | 5 ESTHER | 25.4 | 66.9 | 120 | 928  |
| 1961 | 9 18 6  | 5 ESTHER | 26.1 | 67.8 | 120 | 932  |
| 1961 | 9 18 12 | 5 ESTHER | 27.0 | 68.6 | 125 | 938  |
| 1961 | 9 18 18 | 5 ESTHER | 28.0 | 69.4 | 125 | 944  |
| 1961 | 9 19 0  | 5 ESTHER | 29.0 | 70.1 | 125 | 948  |
| 1961 | 9 19 6  | 5 ESTHER | 30.0 | 71.0 | 125 | 945  |
| 1961 | 9 19 12 | 5 ESTHER | 31.0 | 71.9 | 125 | 942  |
| 1961 | 9 19 18 | 5 ESTHER | 32.0 | 72.6 | 125 | 950  |
| 1961 | 9 20 0  | 5 ESTHER | 33.0 | 73.1 | 120 | 947  |
| 1961 | 9 20 6  | 5 ESTHER | 34.0 | 73.4 | 120 | 957  |
| 1961 | 9 20 12 | 5 ESTHER | 35.0 | 73.3 | 120 | 949  |
| 1961 | 9 20 18 | 5 ESTHER | 36.3 | 73.0 | 120 | 955  |
| 1961 | 9 21 0  | 5 ESTHER | 37.8 | 72.5 | 115 | 968  |
| 1961 | 9 21 6  | 5 ESTHER | 39.2 | 71.8 | 110 | 972  |
| 1961 | 9 21 12 | 5 ESTHER | 40.4 | 71.1 | 110 | 978  |
| 1961 | 9 21 18 | 5 ESTHER | 40.9 | 70.7 | 105 | 0    |
| 1961 | 9 22 0  | 5 ESTHER | 40.9 | 70.1 | 60  | 0    |
| 1961 | 9 22 6  | 5 ESTHER | 40.9 | 69.1 | 50  | 0    |
| 1961 | 9 22 12 | 5 ESTHER | 40.8 | 67.9 | 45  | 990  |
| 1961 | 9 22 18 | 5 ESTHER | 40.4 | 66.6 | 50  | 0    |
| 1961 | 9 23 0  | 5 ESTHER | 39.7 | 65.4 | 60  | 993  |
| 1961 | 9 23 6  | 5 ESTHER | 38.8 | 64.8 | 60  | 0    |
| 1961 | 9 23 12 | 5 ESTHER | 37.9 | 64.9 | 60  | 0    |
| 1961 | 9 23 18 | 5 ESTHER | 37.0 | 65.3 | 60  | 0    |
| 1961 | 9 24 0  | 5 ESTHER | 36.1 | 65.9 | 55  | 0    |
| 1961 | 9 24 6  | 5 ESTHER | 35.6 | 66.6 | 55  | 0    |
| 1961 | 9 24 12 | 5 ESTHER | 35.7 | 67.4 | 50  | 0    |
| 1961 | 9 24 18 | 5 ESTHER | 36.1 | 68.4 | 50  | 0    |
| 1961 | 9 25 0  | 5 ESTHER | 36.7 | 69.5 | 45  | 0    |
| 1961 | 9 25 6  | 5 ESTHER | 37.4 | 70.2 | 45  | 993  |
| 1961 | 9 25 12 | 5 ESTHER | 38.1 | 70.5 | 45  | 0    |
| 1961 | 9 25 18 | 5 ESTHER | 38.9 | 70.5 | 45  | 0    |
| 1961 | 9 26 0  | 5 ESTHER | 40.0 | 70.3 | 40  | 996  |
| 1961 | 9 26 6  | 5 ESTHER | 42.2 | 70.1 | 35  | 0    |
| 1961 | 9 26 12 | 5 ESTHER | 44.7 | 69.8 | 30  | 1002 |

|      |    |    |    |   |           |      |      |     |      |
|------|----|----|----|---|-----------|------|------|-----|------|
| 1961 | 9  | 26 | 18 | 5 | ESTHER    | 46.6 | 69.2 | 30  | 0    |
| 1961 | 9  | 27 | 0  | 5 | ESTHER    | 48.2 | 68.3 | 30  | 0    |
| 1961 | 9  | 27 | 6  | 5 | ESTHER    | 50.0 | 67.0 | 30  | 0    |
| 1961 | 9  | 12 | 12 | 6 | NOT NAMED | 25.8 | 78.0 | 25  | 0    |
| 1961 | 9  | 12 | 18 | 6 | NOT NAMED | 26.0 | 78.0 | 30  | 0    |
| 1961 | 9  | 13 | 0  | 6 | NOT NAMED | 26.2 | 78.1 | 30  | 0    |
| 1961 | 9  | 13 | 6  | 6 | NOT NAMED | 27.0 | 78.1 | 30  | 0    |
| 1961 | 9  | 13 | 12 | 6 | NOT NAMED | 28.6 | 78.2 | 30  | 0    |
| 1961 | 9  | 13 | 18 | 6 | NOT NAMED | 30.0 | 78.2 | 30  | 0    |
| 1961 | 9  | 14 | 0  | 6 | NOT NAMED | 31.7 | 78.2 | 30  | 0    |
| 1961 | 9  | 14 | 6  | 6 | NOT NAMED | 33.0 | 78.1 | 30  | 0    |
| 1961 | 9  | 14 | 12 | 6 | NOT NAMED | 34.7 | 77.9 | 35  | 0    |
| 1961 | 9  | 14 | 18 | 6 | NOT NAMED | 36.7 | 76.8 | 35  | 0    |
| 1961 | 9  | 15 | 0  | 6 | NOT NAMED | 38.7 | 75.4 | 35  | 0    |
| 1961 | 9  | 15 | 6  | 6 | NOT NAMED | 40.7 | 73.5 | 35  | 0    |
| 1961 | 9  | 15 | 12 | 6 | NOT NAMED | 44.1 | 70.1 | 35  | 0    |
| 1961 | 9  | 15 | 18 | 6 | NOT NAMED | 47.6 | 63.0 | 30  | 0    |
| 1961 | 9  | 30 | 6  | 7 | FRANCES   | 16.0 | 57.0 | 30  | 0    |
| 1961 | 9  | 30 | 12 | 7 | FRANCES   | 16.1 | 58.7 | 35  | 1007 |
| 1961 | 9  | 30 | 18 | 7 | FRANCES   | 16.2 | 59.5 | 45  | 1006 |
| 1961 | 10 | 1  | 0  | 7 | FRANCES   | 16.2 | 60.3 | 45  | 0    |
| 1961 | 10 | 1  | 6  | 7 | FRANCES   | 16.2 | 61.1 | 40  | 0    |
| 1961 | 10 | 1  | 12 | 7 | FRANCES   | 16.0 | 62.1 | 40  | 1004 |
| 1961 | 10 | 1  | 18 | 7 | FRANCES   | 15.9 | 63.1 | 40  | 0    |
| 1961 | 10 | 2  | 0  | 7 | FRANCES   | 16.1 | 64.0 | 40  | 1010 |
| 1961 | 10 | 2  | 6  | 7 | FRANCES   | 16.2 | 65.0 | 45  | 0    |
| 1961 | 10 | 2  | 12 | 7 | FRANCES   | 16.4 | 66.1 | 50  | 1011 |
| 1961 | 10 | 2  | 18 | 7 | FRANCES   | 17.0 | 67.1 | 50  | 1010 |
| 1961 | 10 | 3  | 0  | 7 | FRANCES   | 17.8 | 67.9 | 50  | 0    |
| 1961 | 10 | 3  | 6  | 7 | FRANCES   | 18.5 | 68.6 | 50  | 0    |
| 1961 | 10 | 3  | 12 | 7 | FRANCES   | 19.2 | 69.1 | 50  | 1010 |
| 1961 | 10 | 3  | 18 | 7 | FRANCES   | 20.6 | 69.7 | 55  | 0    |
| 1961 | 10 | 4  | 0  | 7 | FRANCES   | 22.0 | 70.3 | 55  | 1005 |
| 1961 | 10 | 4  | 6  | 7 | FRANCES   | 23.0 | 70.7 | 60  | 0    |
| 1961 | 10 | 4  | 12 | 7 | FRANCES   | 24.3 | 71.3 | 65  | 999  |
| 1961 | 10 | 4  | 18 | 7 | FRANCES   | 25.4 | 71.6 | 70  | 0    |
| 1961 | 10 | 5  | 0  | 7 | FRANCES   | 26.9 | 71.2 | 75  | 997  |
| 1961 | 10 | 5  | 6  | 7 | FRANCES   | 27.4 | 71.1 | 80  | 991  |
| 1961 | 10 | 5  | 12 | 7 | FRANCES   | 28.7 | 70.7 | 85  | 974  |
| 1961 | 10 | 5  | 18 | 7 | FRANCES   | 29.2 | 70.3 | 90  | 0    |
| 1961 | 10 | 6  | 0  | 7 | FRANCES   | 30.0 | 69.5 | 95  | 960  |
| 1961 | 10 | 6  | 6  | 7 | FRANCES   | 30.5 | 68.8 | 100 | 0    |
| 1961 | 10 | 6  | 12 | 7 | FRANCES   | 31.2 | 68.2 | 105 | 968  |
| 1961 | 10 | 6  | 18 | 7 | FRANCES   | 32.2 | 67.4 | 105 | 954  |

|               |           |      |      |     |      |
|---------------|-----------|------|------|-----|------|
| 1961 10 7 0   | 7 FRANCES | 32.9 | 66.3 | 110 | 948  |
| 1961 10 7 6   | 7 FRANCES | 34.0 | 65.1 | 110 | 0    |
| 1961 10 7 12  | 7 FRANCES | 35.5 | 64.5 | 110 | 0    |
| 1961 10 7 18  | 7 FRANCES | 36.6 | 64.2 | 110 | 0    |
| 1961 10 8 0   | 7 FRANCES | 38.5 | 64.2 | 105 | 0    |
| 1961 10 8 6   | 7 FRANCES | 39.2 | 64.7 | 100 | 0    |
| 1961 10 8 12  | 7 FRANCES | 40.1 | 65.2 | 95  | 0    |
| 1961 10 8 18  | 7 FRANCES | 41.2 | 66.0 | 70  | 0    |
| 1961 10 9 0   | 7 FRANCES | 42.2 | 66.5 | 65  | 0    |
| 1961 10 9 6   | 7 FRANCES | 43.1 | 67.4 | 50  | 0    |
| 1961 10 9 12  | 7 FRANCES | 43.5 | 67.8 | 40  | 0    |
| 1961 10 9 18  | 7 FRANCES | 44.4 | 65.8 | 40  | 0    |
| 1961 10 10 0  | 7 FRANCES | 45.0 | 64.0 | 35  | 0    |
| 1961 10 10 6  | 7 FRANCES | 46.0 | 59.2 | 35  | 0    |
| 1961 10 16 0  | 8 GERDA   | 17.5 | 77.0 | 30  | 0    |
| 1961 10 16 6  | 8 GERDA   | 18.3 | 77.5 | 30  | 0    |
| 1961 10 16 12 | 8 GERDA   | 18.9 | 77.8 | 30  | 1005 |
| 1961 10 16 18 | 8 GERDA   | 19.4 | 77.9 | 30  | 0    |
| 1961 10 17 0  | 8 GERDA   | 19.9 | 77.9 | 30  | 0    |
| 1961 10 17 6  | 8 GERDA   | 20.4 | 78.0 | 30  | 0    |
| 1961 10 17 12 | 8 GERDA   | 21.0 | 78.0 | 30  | 0    |
| 1961 10 17 18 | 8 GERDA   | 21.5 | 78.0 | 30  | 0    |
| 1961 10 18 0  | 8 GERDA   | 22.0 | 78.0 | 30  | 1003 |
| 1961 10 18 6  | 8 GERDA   | 22.8 | 77.8 | 30  | 0    |
| 1961 10 18 12 | 8 GERDA   | 23.7 | 77.7 | 30  | 1004 |
| 1961 10 18 18 | 8 GERDA   | 24.7 | 76.8 | 30  | 0    |
| 1961 10 19 0  | 8 GERDA   | 25.7 | 75.8 | 30  | 1003 |
| 1961 10 19 6  | 8 GERDA   | 26.8 | 74.4 | 30  | 0    |
| 1961 10 19 12 | 8 GERDA   | 28.8 | 73.0 | 30  | 1001 |
| 1961 10 19 18 | 8 GERDA   | 31.5 | 71.5 | 55  | 996  |
| 1961 10 20 0  | 8 GERDA   | 34.0 | 70.0 | 55  | 0    |
| 1961 10 20 6  | 8 GERDA   | 37.2 | 68.6 | 55  | 0    |
| 1961 10 20 12 | 8 GERDA   | 39.5 | 68.4 | 55  | 987  |
| 1961 10 20 18 | 8 GERDA   | 41.3 | 66.8 | 60  | 0    |
| 1961 10 21 0  | 8 GERDA   | 42.0 | 65.0 | 60  | 993  |
| 1961 10 21 6  | 8 GERDA   | 42.9 | 63.0 | 50  | 0    |
| 1961 10 21 12 | 8 GERDA   | 43.4 | 61.6 | 40  | 994  |
| 1961 10 21 18 | 8 GERDA   | 44.0 | 58.7 | 30  | 0    |
| 1961 10 22 0  | 8 GERDA   | 44.0 | 56.5 | 30  | 0    |
| 1961 10 22 6  | 8 GERDA   | 44.0 | 52.7 | 30  | 0    |
| 1961 10 22 12 | 8 GERDA   | 44.0 | 49.0 | 30  | 0    |
| 1961 10 22 18 | 8 GERDA   | 44.0 | 45.0 | 30  | 0    |
| 1961 10 27 12 | 9 HATTIE  | 11.6 | 81.5 | 45  | 0    |
| 1961 10 27 18 | 9 HATTIE  | 12.0 | 81.6 | 55  | 0    |

|            |    |    |          |      |      |     |      |
|------------|----|----|----------|------|------|-----|------|
| 1961 10 28 | 0  | 9  | HATTIE   | 12.8 | 81.7 | 65  | 991  |
| 1961 10 28 | 6  | 9  | HATTIE   | 12.9 | 81.7 | 100 | 0    |
| 1961 10 28 | 12 | 9  | HATTIE   | 13.5 | 81.6 | 105 | 991  |
| 1961 10 28 | 18 | 9  | HATTIE   | 14.1 | 81.5 | 110 | 969  |
| 1961 10 29 | 0  | 9  | HATTIE   | 15.0 | 81.4 | 110 | 952  |
| 1961 10 29 | 6  | 9  | HATTIE   | 16.1 | 81.2 | 110 | 0    |
| 1961 10 29 | 12 | 9  | HATTIE   | 16.9 | 81.3 | 110 | 963  |
| 1961 10 29 | 18 | 9  | HATTIE   | 17.7 | 81.9 | 110 | 0    |
| 1961 10 30 | 0  | 9  | HATTIE   | 18.2 | 82.4 | 115 | 956  |
| 1961 10 30 | 6  | 9  | HATTIE   | 18.5 | 83.8 | 120 | 942  |
| 1961 10 30 | 12 | 9  | HATTIE   | 18.4 | 84.1 | 130 | 937  |
| 1961 10 30 | 18 | 9  | HATTIE   | 18.2 | 85.2 | 140 | 0    |
| 1961 10 31 | 0  | 9  | HATTIE   | 17.9 | 86.1 | 140 | 920  |
| 1961 10 31 | 6  | 9  | HATTIE   | 17.6 | 87.1 | 140 | 0    |
| 1961 10 31 | 12 | 9  | HATTIE   | 17.2 | 88.1 | 120 | 930  |
| 1961 10 31 | 18 | 9  | HATTIE   | 16.9 | 88.9 | 60  | 0    |
| 1961 11    | 1  | 0  | 9 HATTIE | 16.6 | 89.6 | 55  | 0    |
| 1961 11    | 1  | 6  | 9 HATTIE | 15.7 | 90.1 | 45  | 0    |
| 1961 11    | 1  | 12 | 10 JENNY | 17.0 | 62.0 | 30  | 0    |
| 1961 11    | 1  | 18 | 10 JENNY | 19.3 | 61.0 | 30  | 1006 |
| 1961 11    | 2  | 0  | 10 JENNY | 21.0 | 60.0 | 30  | 0    |
| 1961 11    | 2  | 6  | 10 JENNY | 22.3 | 59.0 | 30  | 0    |
| 1961 11    | 2  | 12 | 10 JENNY | 23.8 | 58.0 | 30  | 0    |
| 1961 11    | 2  | 18 | 10 JENNY | 24.8 | 57.2 | 30  | 0    |
| 1961 11    | 3  | 0  | 10 JENNY | 26.0 | 56.8 | 30  | 0    |
| 1961 11    | 3  | 6  | 10 JENNY | 26.7 | 55.6 | 30  | 0    |
| 1961 11    | 3  | 12 | 10 JENNY | 26.9 | 54.5 | 30  | 0    |
| 1961 11    | 3  | 18 | 10 JENNY | 27.0 | 52.9 | 30  | 0    |
| 1961 11    | 4  | 0  | 10 JENNY | 27.0 | 51.3 | 30  | 0    |
| 1961 11    | 4  | 6  | 10 JENNY | 27.0 | 48.9 | 30  | 0    |
| 1961 11    | 4  | 12 | 10 JENNY | 27.0 | 47.0 | 30  | 1002 |
| 1961 11    | 4  | 18 | 10 JENNY | 26.0 | 46.0 | 30  | 0    |
| 1961 11    | 5  | 0  | 10 JENNY | 25.7 | 45.0 | 30  | 0    |
| 1961 11    | 5  | 6  | 10 JENNY | 25.9 | 43.8 | 30  | 0    |
| 1961 11    | 5  | 12 | 10 JENNY | 26.5 | 43.2 | 30  | 0    |
| 1961 11    | 5  | 18 | 10 JENNY | 27.6 | 43.5 | 30  | 991  |
| 1961 11    | 6  | 0  | 10 JENNY | 28.8 | 47.0 | 45  | 976  |
| 1961 11    | 6  | 6  | 10 JENNY | 28.4 | 49.1 | 55  | 0    |
| 1961 11    | 6  | 12 | 10 JENNY | 28.0 | 51.0 | 65  | 0    |
| 1961 11    | 6  | 18 | 10 JENNY | 28.3 | 52.3 | 70  | 974  |
| 1961 11    | 7  | 0  | 10 JENNY | 28.5 | 52.4 | 70  | 0    |
| 1961 11    | 7  | 6  | 10 JENNY | 28.7 | 52.5 | 65  | 0    |
| 1961 11    | 7  | 12 | 10 JENNY | 28.8 | 52.8 | 60  | 988  |
| 1961 11    | 7  | 18 | 10 JENNY | 29.7 | 51.9 | 60  | 0    |

|         |   |    |    |        |      |      |    |      |
|---------|---|----|----|--------|------|------|----|------|
| 1961 11 | 8 | 0  | 10 | JENNY  | 30.4 | 51.7 | 55 | 985  |
| 1961 11 | 8 | 6  | 10 | JENNY  | 31.1 | 50.9 | 50 | 0    |
| 1961 11 | 8 | 12 | 10 | JENNY  | 31.8 | 50.4 | 50 | 0    |
| 1961 11 | 8 | 18 | 10 | JENNY  | 32.4 | 49.3 | 45 | 0    |
| 1961 11 | 9 | 0  | 10 | JENNY  | 32.7 | 48.6 | 40 | 987  |
| 1961 11 | 9 | 6  | 10 | JENNY  | 33.2 | 47.5 | 40 | 0    |
| 1961 11 | 9 | 12 | 10 | JENNY  | 33.8 | 46.5 | 35 | 0    |
| 1961 11 | 9 | 18 | 10 | JENNY  | 34.5 | 45.8 | 35 | 0    |
| 1961 11 | 5 | 0  | 11 | INGA   | 20.8 | 94.7 | 40 | 0    |
| 1961 11 | 5 | 6  | 11 | INGA   | 21.5 | 95.5 | 45 | 0    |
| 1961 11 | 5 | 12 | 11 | INGA   | 22.1 | 95.9 | 45 | 997  |
| 1961 11 | 5 | 18 | 11 | INGA   | 22.5 | 96.0 | 50 | 0    |
| 1961 11 | 6 | 0  | 11 | INGA   | 22.5 | 95.9 | 50 | 992  |
| 1961 11 | 6 | 6  | 11 | INGA   | 21.9 | 95.8 | 55 | 0    |
| 1961 11 | 6 | 12 | 11 | INGA   | 21.2 | 95.5 | 55 | 998  |
| 1961 11 | 6 | 18 | 11 | INGA   | 20.2 | 94.7 | 60 | 0    |
| 1961 11 | 7 | 0  | 11 | INGA   | 19.5 | 94.0 | 60 | 1004 |
| 1961 11 | 7 | 6  | 11 | INGA   | 19.5 | 93.9 | 60 | 0    |
| 1961 11 | 7 | 12 | 11 | INGA   | 19.5 | 93.8 | 60 | 0    |
| 1961 11 | 7 | 18 | 11 | INGA   | 19.5 | 93.8 | 60 | 0    |
| 1961 11 | 8 | 0  | 11 | INGA   | 19.5 | 93.8 | 60 | 0    |
| 1961 11 | 8 | 6  | 11 | INGA   | 19.5 | 93.8 | 55 | 0    |
| 1961 11 | 8 | 12 | 11 | INGA   | 19.4 | 93.7 | 50 | 0    |
| 1962    | 8 | 26 | 12 | 1 ALMA | 25.3 | 79.7 | 25 | 0    |
| 1962    | 8 | 26 | 18 | 1 ALMA | 26.4 | 80.1 | 25 | 0    |
| 1962    | 8 | 27 | 0  | 1 ALMA | 27.7 | 80.3 | 25 | 0    |
| 1962    | 8 | 27 | 6  | 1 ALMA | 29.2 | 80.2 | 30 | 1007 |
| 1962    | 8 | 27 | 12 | 1 ALMA | 30.6 | 79.7 | 40 | 0    |
| 1962    | 8 | 27 | 18 | 1 ALMA | 31.8 | 78.8 | 45 | 0    |
| 1962    | 8 | 28 | 0  | 1 ALMA | 32.9 | 77.7 | 45 | 1002 |
| 1962    | 8 | 28 | 6  | 1 ALMA | 34.1 | 76.6 | 50 | 0    |
| 1962    | 8 | 28 | 12 | 1 ALMA | 35.2 | 75.3 | 65 | 986  |
| 1962    | 8 | 28 | 18 | 1 ALMA | 36.9 | 73.5 | 75 | 991  |
| 1962    | 8 | 29 | 0  | 1 ALMA | 38.7 | 71.7 | 80 | 988  |
| 1962    | 8 | 29 | 6  | 1 ALMA | 40.1 | 70.4 | 85 | 0    |
| 1962    | 8 | 29 | 12 | 1 ALMA | 41.0 | 69.4 | 80 | 990  |
| 1962    | 8 | 29 | 18 | 1 ALMA | 41.5 | 68.7 | 75 | 0    |
| 1962    | 8 | 30 | 0  | 1 ALMA | 41.5 | 67.9 | 60 | 994  |
| 1962    | 8 | 30 | 6  | 1 ALMA | 41.3 | 67.0 | 55 | 0    |
| 1962    | 8 | 30 | 12 | 1 ALMA | 41.0 | 66.5 | 45 | 0    |
| 1962    | 8 | 30 | 18 | 1 ALMA | 40.8 | 65.1 | 40 | 0    |
| 1962    | 8 | 31 | 0  | 1 ALMA | 40.5 | 64.3 | 40 | 0    |
| 1962    | 8 | 31 | 6  | 1 ALMA | 39.9 | 63.5 | 40 | 0    |
| 1962    | 8 | 31 | 12 | 1 ALMA | 39.1 | 63.3 | 40 | 0    |



|      |   |    |    |   |       |      |      |    |      |
|------|---|----|----|---|-------|------|------|----|------|
| 1962 | 8 | 31 | 18 | 1 | ALMA  | 38.6 | 63.8 | 35 | 0    |
| 1962 | 9 | 1  | 0  | 1 | ALMA  | 38.3 | 64.4 | 35 | 0    |
| 1962 | 9 | 1  | 6  | 1 | ALMA  | 38.4 | 65.1 | 35 | 0    |
| 1962 | 9 | 1  | 12 | 1 | ALMA  | 38.8 | 65.6 | 35 | 0    |
| 1962 | 9 | 1  | 18 | 1 | ALMA  | 39.3 | 65.2 | 35 | 0    |
| 1962 | 9 | 2  | 0  | 1 | ALMA  | 39.7 | 65.0 | 35 | 0    |
| 1962 | 9 | 2  | 6  | 1 | ALMA  | 40.9 | 63.6 | 25 | 1002 |
| 1962 | 9 | 2  | 12 | 1 | ALMA  | 42.2 | 61.0 | 15 | 0    |
| 1962 | 9 | 2  | 18 | 1 | ALMA  | 45.3 | 55.5 | 15 | 0    |
| 1962 | 8 | 27 | 6  | 2 | BECKY | 16.0 | 18.8 | 15 | 0    |
| 1962 | 8 | 27 | 12 | 2 | BECKY | 16.0 | 19.8 | 15 | 0    |
| 1962 | 8 | 27 | 18 | 2 | BECKY | 16.1 | 20.7 | 15 | 0    |
| 1962 | 8 | 28 | 0  | 2 | BECKY | 16.4 | 21.7 | 15 | 0    |
| 1962 | 8 | 28 | 6  | 2 | BECKY | 17.1 | 22.3 | 25 | 0    |
| 1962 | 8 | 28 | 12 | 2 | BECKY | 18.2 | 23.3 | 30 | 0    |
| 1962 | 8 | 28 | 18 | 2 | BECKY | 19.5 | 23.3 | 35 | 0    |
| 1962 | 8 | 29 | 0  | 2 | BECKY | 21.1 | 23.5 | 35 | 0    |
| 1962 | 8 | 29 | 6  | 2 | BECKY | 22.9 | 23.9 | 35 | 0    |
| 1962 | 8 | 29 | 12 | 2 | BECKY | 24.6 | 24.8 | 35 | 0    |
| 1962 | 8 | 29 | 18 | 2 | BECKY | 26.0 | 26.0 | 35 | 0    |
| 1962 | 8 | 30 | 0  | 2 | BECKY | 27.4 | 27.1 | 35 | 0    |
| 1962 | 8 | 30 | 6  | 2 | BECKY | 29.0 | 28.2 | 35 | 0    |
| 1962 | 8 | 30 | 12 | 2 | BECKY | 30.7 | 28.8 | 35 | 0    |
| 1962 | 8 | 30 | 18 | 2 | BECKY | 32.6 | 27.9 | 35 | 0    |
| 1962 | 8 | 31 | 0  | 2 | BECKY | 34.3 | 26.8 | 35 | 0    |
| 1962 | 8 | 31 | 6  | 2 | BECKY | 36.0 | 25.2 | 30 | 0    |
| 1962 | 8 | 31 | 12 | 2 | BECKY | 37.4 | 23.6 | 25 | 0    |
| 1962 | 8 | 31 | 18 | 2 | BECKY | 39.0 | 21.9 | 25 | 0    |
| 1962 | 9 | 1  | 0  | 2 | BECKY | 40.7 | 19.5 | 25 | 0    |
| 1962 | 9 | 1  | 6  | 2 | BECKY | 42.1 | 17.0 | 20 | 0    |
| 1962 | 9 | 1  | 12 | 2 | BECKY | 43.3 | 15.4 | 15 | 0    |
| 1962 | 9 | 1  | 18 | 2 | BECKY | 44.9 | 14.0 | 15 | 0    |
| 1962 | 9 | 12 | 0  | 3 | CELIA | 15.9 | 45.9 | 25 | 0    |
| 1962 | 9 | 12 | 6  | 3 | CELIA | 16.0 | 46.7 | 25 | 0    |
| 1962 | 9 | 12 | 12 | 3 | CELIA | 16.2 | 47.5 | 30 | 0    |
| 1962 | 9 | 12 | 18 | 3 | CELIA | 16.4 | 48.7 | 35 | 0    |
| 1962 | 9 | 13 | 0  | 3 | CELIA | 16.6 | 49.8 | 40 | 0    |
| 1962 | 9 | 13 | 6  | 3 | CELIA | 17.0 | 51.2 | 50 | 0    |
| 1962 | 9 | 13 | 12 | 3 | CELIA | 17.5 | 52.6 | 60 | 995  |
| 1962 | 9 | 13 | 18 | 3 | CELIA | 17.9 | 53.9 | 50 | 0    |
| 1962 | 9 | 14 | 0  | 3 | CELIA | 18.4 | 55.1 | 45 | 0    |
| 1962 | 9 | 14 | 6  | 3 | CELIA | 18.8 | 56.2 | 45 | 1005 |
| 1962 | 9 | 14 | 12 | 3 | CELIA | 19.3 | 57.3 | 45 | 1007 |
| 1962 | 9 | 14 | 18 | 3 | CELIA | 19.7 | 58.0 | 45 | 0    |

|      |      |    |   |       |      |      |    |      |
|------|------|----|---|-------|------|------|----|------|
| 1962 | 9 15 | 0  | 3 | CELIA | 20.1 | 58.6 | 40 | 0    |
| 1962 | 9 15 | 6  | 3 | CELIA | 20.8 | 59.4 | 35 | 0    |
| 1962 | 9 15 | 12 | 3 | CELIA | 21.6 | 60.1 | 30 | 1010 |
| 1962 | 9 15 | 18 | 3 | CELIA | 23.1 | 60.5 | 30 | 0    |
| 1962 | 9 16 | 0  | 3 | CELIA | 24.6 | 60.5 | 25 | 0    |
| 1962 | 9 16 | 6  | 3 | CELIA | 26.0 | 60.5 | 25 | 0    |
| 1962 | 9 16 | 12 | 3 | CELIA | 27.5 | 60.3 | 25 | 0    |
| 1962 | 9 16 | 18 | 3 | CELIA | 28.7 | 59.7 | 25 | 0    |
| 1962 | 9 17 | 0  | 3 | CELIA | 29.7 | 58.9 | 25 | 1010 |
| 1962 | 9 17 | 6  | 3 | CELIA | 30.1 | 57.6 | 25 | 0    |
| 1962 | 9 17 | 12 | 3 | CELIA | 29.8 | 56.3 | 25 | 0    |
| 1962 | 9 17 | 18 | 3 | CELIA | 30.0 | 55.0 | 25 | 0    |
| 1962 | 9 18 | 0  | 3 | CELIA | 30.3 | 53.6 | 25 | 0    |
| 1962 | 9 18 | 6  | 3 | CELIA | 30.5 | 52.5 | 25 | 0    |
| 1962 | 9 18 | 12 | 3 | CELIA | 30.0 | 51.6 | 30 | 0    |
| 1962 | 9 18 | 18 | 3 | CELIA | 29.6 | 51.8 | 30 | 0    |
| 1962 | 9 19 | 0  | 3 | CELIA | 29.1 | 52.2 | 30 | 0    |
| 1962 | 9 19 | 6  | 3 | CELIA | 29.2 | 52.5 | 35 | 0    |
| 1962 | 9 19 | 12 | 3 | CELIA | 29.2 | 52.8 | 40 | 0    |
| 1962 | 9 19 | 18 | 3 | CELIA | 29.3 | 53.6 | 40 | 1005 |
| 1962 | 9 20 | 0  | 3 | CELIA | 29.6 | 54.4 | 40 | 0    |
| 1962 | 9 20 | 6  | 3 | CELIA | 30.7 | 55.2 | 30 | 0    |
| 1962 | 9 20 | 12 | 3 | CELIA | 31.9 | 55.5 | 25 | 1009 |
| 1962 | 9 20 | 18 | 3 | CELIA | 32.7 | 55.2 | 25 | 0    |
| 1962 | 9 21 | 0  | 3 | CELIA | 33.6 | 54.8 | 25 | 0    |
| 1962 | 9 21 | 6  | 3 | CELIA | 35.8 | 53.7 | 25 | 0    |
| 1962 | 9 21 | 12 | 3 | CELIA | 38.0 | 52.6 | 25 | 0    |
| 1962 | 9 21 | 18 | 3 | CELIA | 40.7 | 52.1 | 25 | 0    |
| 1962 | 9 29 | 6  | 4 | DAISY | 14.5 | 48.9 | 25 | 0    |
| 1962 | 9 29 | 12 | 4 | DAISY | 14.8 | 50.5 | 25 | 0    |
| 1962 | 9 29 | 18 | 4 | DAISY | 15.0 | 52.3 | 30 | 0    |
| 1962 | 9 30 | 0  | 4 | DAISY | 15.2 | 54.0 | 30 | 0    |
| 1962 | 9 30 | 6  | 4 | DAISY | 15.5 | 55.6 | 30 | 0    |
| 1962 | 9 30 | 12 | 4 | DAISY | 15.8 | 57.2 | 30 | 0    |
| 1962 | 9 30 | 18 | 4 | DAISY | 16.3 | 58.8 | 30 | 0    |
| 1962 | 10 1 | 0  | 4 | DAISY | 16.9 | 59.9 | 30 | 0    |
| 1962 | 10 1 | 6  | 4 | DAISY | 17.4 | 60.7 | 30 | 0    |
| 1962 | 10 1 | 12 | 4 | DAISY | 17.8 | 61.2 | 30 | 0    |
| 1962 | 10 1 | 18 | 4 | DAISY | 19.0 | 62.0 | 30 | 0    |
| 1962 | 10 2 | 0  | 4 | DAISY | 20.3 | 62.6 | 30 | 0    |
| 1962 | 10 2 | 6  | 4 | DAISY | 21.3 | 62.8 | 30 | 1003 |
| 1962 | 10 2 | 12 | 4 | DAISY | 21.8 | 63.2 | 40 | 0    |
| 1962 | 10 2 | 18 | 4 | DAISY | 22.5 | 63.8 | 45 | 0    |
| 1962 | 10 3 | 0  | 4 | DAISY | 22.8 | 64.4 | 50 | 0    |

|                      |      |      |    |      |
|----------------------|------|------|----|------|
| 1962 10 3 6 4 DAISY  | 23.1 | 65.1 | 55 | 0    |
| 1962 10 3 12 4 DAISY | 23.3 | 65.6 | 60 | 0    |
| 1962 10 3 18 4 DAISY | 23.6 | 66.3 | 65 | 0    |
| 1962 10 4 0 4 DAISY  | 23.9 | 67.0 | 65 | 994  |
| 1962 10 4 6 4 DAISY  | 24.1 | 67.3 | 65 | 0    |
| 1962 10 4 12 4 DAISY | 24.3 | 68.1 | 65 | 0    |
| 1962 10 4 18 4 DAISY | 24.8 | 68.9 | 70 | 986  |
| 1962 10 5 0 4 DAISY  | 25.5 | 69.4 | 80 | 0    |
| 1962 10 5 6 4 DAISY  | 26.4 | 69.8 | 85 | 0    |
| 1962 10 5 12 4 DAISY | 27.2 | 69.8 | 85 | 0    |
| 1962 10 5 18 4 DAISY | 28.0 | 69.6 | 95 | 969  |
| 1962 10 6 0 4 DAISY  | 29.2 | 69.6 | 90 | 0    |
| 1962 10 6 6 4 DAISY  | 31.0 | 68.6 | 80 | 0    |
| 1962 10 6 12 4 DAISY | 32.8 | 68.1 | 85 | 965  |
| 1962 10 6 18 4 DAISY | 34.5 | 67.5 | 95 | 968  |
| 1962 10 7 0 4 DAISY  | 37.1 | 66.3 | 95 | 0    |
| 1962 10 7 6 4 DAISY  | 39.1 | 65.4 | 70 | 975  |
| 1962 10 7 12 4 DAISY | 42.2 | 66.6 | 65 | 0    |
| 1962 10 7 18 4 DAISY | 42.7 | 66.9 | 65 | 0    |
| 1962 10 8 0 4 DAISY  | 43.5 | 66.5 | 65 | 0    |
| 1962 10 8 6 4 DAISY  | 44.1 | 64.8 | 65 | 0    |
| 1962 10 8 12 4 DAISY | 44.7 | 62.8 | 55 | 0    |
| 1962 10 8 18 4 DAISY | 45.1 | 60.3 | 50 | 0    |
| 1962 10 9 0 4 DAISY  | 45.5 | 57.7 | 50 | 0    |
| 1962 10 9 6 4 DAISY  | 46.0 | 54.9 | 50 | 0    |
| 1962 10 14 18 5 ELLA | 22.1 | 71.4 | 25 | 0    |
| 1962 10 15 0 5 ELLA  | 23.8 | 72.1 | 25 | 1002 |
| 1962 10 15 6 5 ELLA  | 24.7 | 72.1 | 30 | 0    |
| 1962 10 15 12 5 ELLA | 25.0 | 72.1 | 35 | 0    |
| 1962 10 15 18 5 ELLA | 25.2 | 72.1 | 40 | 1002 |
| 1962 10 16 0 5 ELLA  | 25.8 | 72.2 | 40 | 1002 |
| 1962 10 16 6 5 ELLA  | 26.1 | 72.6 | 50 | 0    |
| 1962 10 16 12 5 ELLA | 26.3 | 73.2 | 55 | 0    |
| 1962 10 16 18 5 ELLA | 26.4 | 74.0 | 60 | 1002 |
| 1962 10 17 0 5 ELLA  | 26.7 | 74.8 | 60 | 994  |
| 1962 10 17 6 5 ELLA  | 27.0 | 75.1 | 60 | 997  |
| 1962 10 17 12 5 ELLA | 27.4 | 75.2 | 60 | 992  |
| 1962 10 17 18 5 ELLA | 28.1 | 75.4 | 70 | 987  |
| 1962 10 18 0 5 ELLA  | 28.7 | 75.6 | 75 | 0    |
| 1962 10 18 6 5 ELLA  | 29.2 | 75.7 | 70 | 981  |
| 1962 10 18 12 5 ELLA | 29.7 | 75.8 | 70 | 978  |
| 1962 10 18 18 5 ELLA | 30.2 | 75.8 | 70 | 976  |
| 1962 10 19 0 5 ELLA  | 30.7 | 75.8 | 75 | 0    |
| 1962 10 19 6 5 ELLA  | 30.7 | 75.1 | 80 | 973  |

|      |    |    |    |   |        |      |      |     |      |
|------|----|----|----|---|--------|------|------|-----|------|
| 1962 | 10 | 19 | 12 | 5 | ELLA   | 30.7 | 74.6 | 90  | 969  |
| 1962 | 10 | 19 | 18 | 5 | ELLA   | 31.3 | 73.6 | 100 | 962  |
| 1962 | 10 | 20 | 0  | 5 | ELLA   | 31.9 | 72.8 | 100 | 0    |
| 1962 | 10 | 20 | 6  | 5 | ELLA   | 33.0 | 71.8 | 85  | 960  |
| 1962 | 10 | 20 | 12 | 5 | ELLA   | 33.9 | 70.8 | 85  | 960  |
| 1962 | 10 | 20 | 18 | 5 | ELLA   | 34.6 | 69.6 | 85  | 964  |
| 1962 | 10 | 21 | 0  | 5 | ELLA   | 35.2 | 68.1 | 80  | 0    |
| 1962 | 10 | 21 | 6  | 5 | ELLA   | 36.0 | 66.3 | 75  | 0    |
| 1962 | 10 | 21 | 12 | 5 | ELLA   | 36.7 | 64.6 | 70  | 972  |
| 1962 | 10 | 21 | 18 | 5 | ELLA   | 37.5 | 62.6 | 65  | 950  |
| 1962 | 10 | 22 | 0  | 5 | ELLA   | 39.5 | 59.7 | 65  | 0    |
| 1962 | 10 | 22 | 6  | 5 | ELLA   | 42.9 | 56.3 | 60  | 0    |
| 1962 | 10 | 22 | 12 | 5 | ELLA   | 46.7 | 53.4 | 60  | 0    |
| 1962 | 10 | 22 | 18 | 5 | ELLA   | 49.0 | 50.0 | 60  | 0    |
| 1962 | 10 | 23 | 0  | 5 | ELLA   | 52.0 | 45.1 | 60  | 0    |
| 1962 | 10 | 23 | 6  | 5 | ELLA   | 54.1 | 41.4 | 60  | 0    |
| 1962 | 10 | 23 | 12 | 5 | ELLA   | 56.2 | 37.0 | 60  | 0    |
| 1963 | 7  | 31 | 18 | 1 | ARLENE | 11.0 | 39.4 | 25  | 0    |
| 1963 | 8  | 1  | 0  | 1 | ARLENE | 11.0 | 40.9 | 25  | 0    |
| 1963 | 8  | 1  | 6  | 1 | ARLENE | 11.1 | 42.2 | 25  | 0    |
| 1963 | 8  | 1  | 12 | 1 | ARLENE | 11.2 | 43.5 | 25  | 0    |
| 1963 | 8  | 1  | 18 | 1 | ARLENE | 11.3 | 44.8 | 30  | 0    |
| 1963 | 8  | 2  | 0  | 1 | ARLENE | 11.5 | 46.0 | 40  | 0    |
| 1963 | 8  | 2  | 6  | 1 | ARLENE | 12.4 | 47.4 | 50  | 0    |
| 1963 | 8  | 2  | 12 | 1 | ARLENE | 13.3 | 48.7 | 70  | 0    |
| 1963 | 8  | 2  | 18 | 1 | ARLENE | 14.3 | 49.9 | 90  | 987  |
| 1963 | 8  | 3  | 0  | 1 | ARLENE | 14.9 | 50.8 | 80  | 996  |
| 1963 | 8  | 3  | 6  | 1 | ARLENE | 15.2 | 52.3 | 65  | 0    |
| 1963 | 8  | 3  | 12 | 1 | ARLENE | 15.5 | 53.9 | 65  | 1000 |
| 1963 | 8  | 3  | 18 | 1 | ARLENE | 15.9 | 55.3 | 65  | 988  |
| 1963 | 8  | 4  | 0  | 1 | ARLENE | 16.3 | 56.7 | 50  | 0    |
| 1963 | 8  | 4  | 6  | 1 | ARLENE | 16.7 | 58.0 | 45  | 0    |
| 1963 | 8  | 4  | 12 | 1 | ARLENE | 17.4 | 59.2 | 30  | 1007 |
| 1963 | 8  | 4  | 18 | 1 | ARLENE | 18.2 | 60.3 | 30  | 0    |
| 1963 | 8  | 5  | 0  | 1 | ARLENE | 19.1 | 61.4 | 30  | 0    |
| 1963 | 8  | 5  | 6  | 1 | ARLENE | 20.0 | 62.5 | 25  | 0    |
| 1963 | 8  | 5  | 12 | 1 | ARLENE | 21.0 | 63.6 | 25  | 1011 |
| 1963 | 8  | 5  | 18 | 1 | ARLENE | 22.0 | 64.6 | 25  | 0    |
| 1963 | 8  | 6  | 0  | 1 | ARLENE | 22.8 | 65.6 | 25  | 0    |
| 1963 | 8  | 6  | 6  | 1 | ARLENE | 23.5 | 66.7 | 25  | 0    |
| 1963 | 8  | 6  | 12 | 1 | ARLENE | 24.0 | 68.0 | 25  | 1012 |
| 1963 | 8  | 6  | 18 | 1 | ARLENE | 24.4 | 68.8 | 30  | 0    |
| 1963 | 8  | 7  | 0  | 1 | ARLENE | 25.0 | 69.5 | 30  | 0    |
| 1963 | 8  | 7  | 6  | 1 | ARLENE | 25.4 | 70.1 | 30  | 0    |

|      |   |    |    |   |        |      |      |     |      |
|------|---|----|----|---|--------|------|------|-----|------|
| 1963 | 8 | 7  | 12 | 1 | ARLENE | 26.0 | 70.3 | 30  | 0    |
| 1963 | 8 | 7  | 18 | 1 | ARLENE | 26.5 | 70.4 | 30  | 0    |
| 1963 | 8 | 8  | 0  | 1 | ARLENE | 27.3 | 70.5 | 55  | 0    |
| 1963 | 8 | 8  | 6  | 1 | ARLENE | 28.0 | 70.1 | 60  | 0    |
| 1963 | 8 | 8  | 12 | 1 | ARLENE | 28.5 | 69.7 | 65  | 981  |
| 1963 | 8 | 8  | 18 | 1 | ARLENE | 28.8 | 69.1 | 65  | 981  |
| 1963 | 8 | 9  | 0  | 1 | ARLENE | 29.3 | 68.5 | 65  | 0    |
| 1963 | 8 | 9  | 6  | 1 | ARLENE | 30.0 | 67.6 | 70  | 0    |
| 1963 | 8 | 9  | 12 | 1 | ARLENE | 31.3 | 66.2 | 75  | 979  |
| 1963 | 8 | 9  | 18 | 1 | ARLENE | 32.8 | 64.0 | 90  | 974  |
| 1963 | 8 | 10 | 0  | 1 | ARLENE | 34.5 | 61.5 | 90  | 969  |
| 1963 | 8 | 10 | 6  | 1 | ARLENE | 36.4 | 59.0 | 90  | 0    |
| 1963 | 8 | 10 | 12 | 1 | ARLENE | 38.0 | 56.1 | 85  | 985  |
| 1963 | 8 | 10 | 18 | 1 | ARLENE | 40.0 | 54.0 | 80  | 0    |
| 1963 | 8 | 11 | 0  | 1 | ARLENE | 42.5 | 52.0 | 65  | 0    |
| 1963 | 8 | 11 | 6  | 1 | ARLENE | 44.8 | 50.1 | 65  | 0    |
| 1963 | 8 | 20 | 12 | 2 | BEULAH | 13.7 | 49.5 | 30  | 0    |
| 1963 | 8 | 20 | 18 | 2 | BEULAH | 14.3 | 50.9 | 30  | 1006 |
| 1963 | 8 | 21 | 0  | 2 | BEULAH | 15.0 | 51.7 | 30  | 0    |
| 1963 | 8 | 21 | 6  | 2 | BEULAH | 15.5 | 52.8 | 35  | 0    |
| 1963 | 8 | 21 | 12 | 2 | BEULAH | 16.0 | 53.5 | 35  | 0    |
| 1963 | 8 | 21 | 18 | 2 | BEULAH | 16.5 | 54.6 | 45  | 1005 |
| 1963 | 8 | 22 | 0  | 2 | BEULAH | 16.8 | 55.4 | 45  | 0    |
| 1963 | 8 | 22 | 6  | 2 | BEULAH | 17.3 | 56.0 | 55  | 0    |
| 1963 | 8 | 22 | 12 | 2 | BEULAH | 17.9 | 56.9 | 70  | 994  |
| 1963 | 8 | 22 | 18 | 2 | BEULAH | 18.7 | 57.8 | 75  | 0    |
| 1963 | 8 | 23 | 0  | 2 | BEULAH | 19.6 | 58.3 | 80  | 0    |
| 1963 | 8 | 23 | 6  | 2 | BEULAH | 20.5 | 58.8 | 85  | 0    |
| 1963 | 8 | 23 | 12 | 2 | BEULAH | 21.3 | 59.1 | 85  | 0    |
| 1963 | 8 | 23 | 18 | 2 | BEULAH | 22.1 | 59.2 | 90  | 962  |
| 1963 | 8 | 24 | 0  | 2 | BEULAH | 22.6 | 59.4 | 95  | 0    |
| 1963 | 8 | 24 | 6  | 2 | BEULAH | 23.1 | 59.6 | 105 | 958  |
| 1963 | 8 | 24 | 12 | 2 | BEULAH | 23.7 | 59.7 | 105 | 0    |
| 1963 | 8 | 24 | 18 | 2 | BEULAH | 24.1 | 59.8 | 100 | 961  |
| 1963 | 8 | 25 | 0  | 2 | BEULAH | 24.8 | 60.0 | 85  | 0    |
| 1963 | 8 | 25 | 6  | 2 | BEULAH | 25.6 | 60.2 | 80  | 0    |
| 1963 | 8 | 25 | 12 | 2 | BEULAH | 26.6 | 60.3 | 75  | 985  |
| 1963 | 8 | 25 | 18 | 2 | BEULAH | 27.8 | 60.4 | 80  | 976  |
| 1963 | 8 | 26 | 0  | 2 | BEULAH | 29.0 | 60.2 | 80  | 978  |
| 1963 | 8 | 26 | 6  | 2 | BEULAH | 30.4 | 59.2 | 85  | 0    |
| 1963 | 8 | 26 | 12 | 2 | BEULAH | 31.6 | 58.3 | 85  | 983  |
| 1963 | 8 | 26 | 18 | 2 | BEULAH | 32.9 | 57.0 | 85  | 979  |
| 1963 | 8 | 27 | 0  | 2 | BEULAH | 34.5 | 55.3 | 80  | 0    |
| 1963 | 8 | 27 | 6  | 2 | BEULAH | 36.3 | 53.6 | 75  | 0    |

|      |         |             |      |      |    |      |
|------|---------|-------------|------|------|----|------|
| 1963 | 8 27 12 | 2 BEULAH    | 38.4 | 52.3 | 70 | 0    |
| 1963 | 8 27 18 | 2 BEULAH    | 41.6 | 51.0 | 70 | 0    |
| 1963 | 8 28 0  | 2 BEULAH    | 45.8 | 48.3 | 70 | 0    |
| 1963 | 8 28 6  | 2 BEULAH    | 49.4 | 44.9 | 65 | 0    |
| 1963 | 8 28 12 | 2 BEULAH    | 51.6 | 41.0 | 60 | 0    |
| 1963 | 8 28 18 | 2 BEULAH    | 54.2 | 35.5 | 60 | 0    |
| 1963 | 9 10 6  | 3 NOT NAMED | 30.5 | 66.4 | 25 | 0    |
| 1963 | 9 10 12 | 3 NOT NAMED | 32.0 | 66.1 | 25 | 1007 |
| 1963 | 9 10 18 | 3 NOT NAMED | 32.9 | 63.9 | 25 | 0    |
| 1963 | 9 11 0  | 3 NOT NAMED | 33.8 | 61.8 | 25 | 0    |
| 1963 | 9 11 6  | 3 NOT NAMED | 34.8 | 59.7 | 35 | 0    |
| 1963 | 9 11 12 | 3 NOT NAMED | 35.8 | 57.6 | 35 | 1004 |
| 1963 | 9 11 18 | 3 NOT NAMED | 36.5 | 55.8 | 35 | 0    |
| 1963 | 9 12 0  | 3 NOT NAMED | 37.0 | 54.2 | 35 | 0    |
| 1963 | 9 12 6  | 3 NOT NAMED | 37.1 | 52.6 | 45 | 0    |
| 1963 | 9 12 12 | 3 NOT NAMED | 37.2 | 51.3 | 50 | 0    |
| 1963 | 9 12 18 | 3 NOT NAMED | 37.9 | 51.0 | 50 | 992  |
| 1963 | 9 13 0  | 3 NOT NAMED | 38.8 | 51.7 | 50 | 0    |
| 1963 | 9 13 6  | 3 NOT NAMED | 39.7 | 51.0 | 50 | 0    |
| 1963 | 9 13 12 | 3 NOT NAMED | 41.0 | 49.7 | 50 | 0    |
| 1963 | 9 13 18 | 3 NOT NAMED | 43.2 | 47.8 | 50 | 0    |
| 1963 | 9 14 0  | 3 NOT NAMED | 45.7 | 44.6 | 50 | 0    |
| 1963 | 9 14 6  | 3 NOT NAMED | 47.8 | 39.9 | 50 | 995  |
| 1963 | 9 14 12 | 3 NOT NAMED | 49.8 | 35.2 | 50 | 0    |
| 1963 | 9 14 18 | 3 NOT NAMED | 51.5 | 30.6 | 50 | 0    |
| 1963 | 9 15 0  | 3 NOT NAMED | 53.0 | 26.1 | 50 | 0    |
| 1963 | 9 15 6  | 3 NOT NAMED | 54.9 | 22.0 | 50 | 0    |
| 1963 | 9 16 12 | 4 CINDY     | 26.7 | 93.7 | 40 | 0    |
| 1963 | 9 16 18 | 4 CINDY     | 27.3 | 93.9 | 60 | 0    |
| 1963 | 9 17 0  | 4 CINDY     | 28.0 | 93.9 | 70 | 996  |
| 1963 | 9 17 6  | 4 CINDY     | 28.7 | 94.1 | 65 | 0    |
| 1963 | 9 17 12 | 4 CINDY     | 29.4 | 94.4 | 65 | 0    |
| 1963 | 9 17 18 | 4 CINDY     | 29.8 | 94.4 | 65 | 997  |
| 1963 | 9 18 0  | 4 CINDY     | 30.0 | 94.6 | 65 | 0    |
| 1963 | 9 18 6  | 4 CINDY     | 30.1 | 94.9 | 35 | 0    |
| 1963 | 9 18 12 | 4 CINDY     | 30.1 | 95.2 | 30 | 0    |
| 1963 | 9 18 18 | 4 CINDY     | 29.9 | 95.6 | 25 | 0    |
| 1963 | 9 19 0  | 4 CINDY     | 29.5 | 96.0 | 25 | 0    |
| 1963 | 9 19 6  | 4 CINDY     | 29.2 | 96.4 | 25 | 0    |
| 1963 | 9 19 12 | 4 CINDY     | 28.7 | 97.0 | 25 | 0    |
| 1963 | 9 19 18 | 4 CINDY     | 28.4 | 97.4 | 25 | 0    |
| 1963 | 9 20 0  | 4 CINDY     | 27.8 | 98.1 | 25 | 0    |
| 1963 | 9 19 6  | 5 DEBRA     | 14.4 | 38.3 | 25 | 0    |
| 1963 | 9 19 12 | 5 DEBRA     | 15.0 | 39.8 | 25 | 1011 |

|      |         |         |      |      |    |      |
|------|---------|---------|------|------|----|------|
| 1963 | 9 19 18 | 5 DEBRA | 15.7 | 41.2 | 30 | 0    |
| 1963 | 9 20 0  | 5 DEBRA | 16.4 | 42.6 | 30 | 0    |
| 1963 | 9 20 6  | 5 DEBRA | 17.2 | 44.0 | 25 | 0    |
| 1963 | 9 20 12 | 5 DEBRA | 17.9 | 45.3 | 25 | 0    |
| 1963 | 9 20 18 | 5 DEBRA | 18.8 | 46.7 | 30 | 1008 |
| 1963 | 9 21 0  | 5 DEBRA | 19.9 | 47.9 | 35 | 0    |
| 1963 | 9 21 6  | 5 DEBRA | 20.9 | 48.5 | 40 | 0    |
| 1963 | 9 21 12 | 5 DEBRA | 21.9 | 48.8 | 50 | 0    |
| 1963 | 9 21 18 | 5 DEBRA | 23.0 | 48.9 | 65 | 1000 |
| 1963 | 9 22 0  | 5 DEBRA | 23.8 | 48.9 | 65 | 0    |
| 1963 | 9 22 6  | 5 DEBRA | 24.6 | 48.8 | 65 | 0    |
| 1963 | 9 22 12 | 5 DEBRA | 25.3 | 48.7 | 65 | 1002 |
| 1963 | 9 22 18 | 5 DEBRA | 26.0 | 48.5 | 65 | 999  |
| 1963 | 9 23 0  | 5 DEBRA | 26.6 | 48.2 | 65 | 0    |
| 1963 | 9 23 6  | 5 DEBRA | 27.3 | 47.9 | 55 | 0    |
| 1963 | 9 23 12 | 5 DEBRA | 28.0 | 47.7 | 50 | 0    |
| 1963 | 9 23 18 | 5 DEBRA | 28.8 | 47.5 | 45 | 999  |
| 1963 | 9 24 0  | 5 DEBRA | 30.2 | 47.5 | 40 | 0    |
| 1963 | 9 24 6  | 5 DEBRA | 31.7 | 47.9 | 35 | 0    |
| 1963 | 9 24 12 | 5 DEBRA | 33.4 | 48.4 | 35 | 1011 |
| 1963 | 9 24 18 | 5 DEBRA | 35.4 | 48.0 | 30 | 0    |
| 1963 | 9 23 12 | 6 EDITH | 11.0 | 52.0 | 25 | 0    |
| 1963 | 9 23 18 | 6 EDITH | 11.5 | 53.0 | 25 | 0    |
| 1963 | 9 24 0  | 6 EDITH | 12.1 | 54.0 | 30 | 1005 |
| 1963 | 9 24 6  | 6 EDITH | 12.5 | 55.3 | 30 | 0    |
| 1963 | 9 24 12 | 6 EDITH | 12.9 | 56.5 | 35 | 1004 |
| 1963 | 9 24 18 | 6 EDITH | 13.2 | 58.2 | 65 | 1000 |
| 1963 | 9 25 0  | 6 EDITH | 13.7 | 59.6 | 85 | 0    |
| 1963 | 9 25 6  | 6 EDITH | 13.9 | 60.6 | 75 | 0    |
| 1963 | 9 25 12 | 6 EDITH | 14.4 | 61.6 | 85 | 993  |
| 1963 | 9 25 18 | 6 EDITH | 14.7 | 62.7 | 85 | 990  |
| 1963 | 9 26 0  | 6 EDITH | 15.0 | 64.1 | 65 | 0    |
| 1963 | 9 26 6  | 6 EDITH | 15.3 | 65.4 | 65 | 998  |
| 1963 | 9 26 12 | 6 EDITH | 15.8 | 66.9 | 65 | 1000 |
| 1963 | 9 26 18 | 6 EDITH | 16.8 | 67.3 | 65 | 1000 |
| 1963 | 9 27 0  | 6 EDITH | 17.8 | 67.5 | 65 | 0    |
| 1963 | 9 27 6  | 6 EDITH | 18.1 | 69.0 | 65 | 996  |
| 1963 | 9 27 12 | 6 EDITH | 18.7 | 69.3 | 65 | 0    |
| 1963 | 9 27 18 | 6 EDITH | 19.5 | 69.9 | 65 | 999  |
| 1963 | 9 28 0  | 6 EDITH | 20.2 | 70.5 | 40 | 0    |
| 1963 | 9 28 6  | 6 EDITH | 20.7 | 70.9 | 35 | 0    |
| 1963 | 9 28 12 | 6 EDITH | 21.3 | 71.5 | 35 | 0    |
| 1963 | 9 28 18 | 6 EDITH | 21.8 | 72.0 | 35 | 0    |
| 1963 | 9 29 0  | 6 EDITH | 22.6 | 72.3 | 30 | 0    |

|      |      |    |         |      |      |     |      |
|------|------|----|---------|------|------|-----|------|
| 1963 | 9 29 | 6  | 6 EDITH | 23.1 | 72.0 | 30  | 0    |
| 1963 | 9 26 | 12 | 7 FLORA | 8.0  | 33.0 | 25  | 0    |
| 1963 | 9 26 | 18 | 7 FLORA | 8.1  | 34.8 | 25  | 0    |
| 1963 | 9 27 | 0  | 7 FLORA | 8.2  | 36.5 | 25  | 0    |
| 1963 | 9 27 | 6  | 7 FLORA | 8.3  | 38.3 | 30  | 0    |
| 1963 | 9 27 | 12 | 7 FLORA | 8.5  | 40.0 | 30  | 0    |
| 1963 | 9 27 | 18 | 7 FLORA | 8.7  | 41.6 | 30  | 0    |
| 1963 | 9 28 | 0  | 7 FLORA | 8.8  | 43.2 | 30  | 0    |
| 1963 | 9 28 | 6  | 7 FLORA | 9.0  | 44.7 | 30  | 0    |
| 1963 | 9 28 | 12 | 7 FLORA | 9.2  | 46.3 | 30  | 0    |
| 1963 | 9 28 | 18 | 7 FLORA | 9.5  | 47.9 | 30  | 0    |
| 1963 | 9 29 | 0  | 7 FLORA | 9.8  | 49.5 | 30  | 0    |
| 1963 | 9 29 | 6  | 7 FLORA | 9.9  | 51.1 | 30  | 0    |
| 1963 | 9 29 | 12 | 7 FLORA | 10.0 | 52.8 | 40  | 1000 |
| 1963 | 9 29 | 18 | 7 FLORA | 10.1 | 54.4 | 55  | 0    |
| 1963 | 9 30 | 0  | 7 FLORA | 10.3 | 56.0 | 70  | 0    |
| 1963 | 9 30 | 6  | 7 FLORA | 10.4 | 57.6 | 85  | 0    |
| 1963 | 9 30 | 12 | 7 FLORA | 10.7 | 59.1 | 100 | 994  |
| 1963 | 9 30 | 18 | 7 FLORA | 11.2 | 60.7 | 105 | 978  |
| 1963 | 10 1 | 0  | 7 FLORA | 11.6 | 62.0 | 110 | 981  |
| 1963 | 10 1 | 6  | 7 FLORA | 12.0 | 63.3 | 110 | 981  |
| 1963 | 10 1 | 12 | 7 FLORA | 12.5 | 64.8 | 115 | 974  |
| 1963 | 10 1 | 18 | 7 FLORA | 13.0 | 66.0 | 115 | 975  |
| 1963 | 10 2 | 0  | 7 FLORA | 13.6 | 67.3 | 120 | 970  |
| 1963 | 10 2 | 6  | 7 FLORA | 14.1 | 68.3 | 120 | 0    |
| 1963 | 10 2 | 12 | 7 FLORA | 14.6 | 69.2 | 120 | 968  |
| 1963 | 10 2 | 18 | 7 FLORA | 15.1 | 70.0 | 120 | 968  |
| 1963 | 10 3 | 0  | 7 FLORA | 15.5 | 70.6 | 120 | 0    |
| 1963 | 10 3 | 6  | 7 FLORA | 15.9 | 71.4 | 125 | 0    |
| 1963 | 10 3 | 12 | 7 FLORA | 16.5 | 72.0 | 125 | 940  |
| 1963 | 10 3 | 18 | 7 FLORA | 17.1 | 72.5 | 125 | 944  |
| 1963 | 10 4 | 0  | 7 FLORA | 18.0 | 73.1 | 125 | 944  |
| 1963 | 10 4 | 6  | 7 FLORA | 19.1 | 74.2 | 105 | 995  |
| 1963 | 10 4 | 12 | 7 FLORA | 19.3 | 74.5 | 105 | 970  |
| 1963 | 10 4 | 18 | 7 FLORA | 20.3 | 74.9 | 105 | 970  |
| 1963 | 10 5 | 0  | 7 FLORA | 20.8 | 75.9 | 110 | 0    |
| 1963 | 10 5 | 6  | 7 FLORA | 20.8 | 76.5 | 110 | 0    |
| 1963 | 10 5 | 12 | 7 FLORA | 20.8 | 76.8 | 105 | 985  |
| 1963 | 10 5 | 18 | 7 FLORA | 20.5 | 77.0 | 100 | 0    |
| 1963 | 10 6 | 0  | 7 FLORA | 20.4 | 77.4 | 100 | 0    |
| 1963 | 10 6 | 6  | 7 FLORA | 20.3 | 77.6 | 95  | 0    |
| 1963 | 10 6 | 12 | 7 FLORA | 20.2 | 77.9 | 90  | 985  |
| 1963 | 10 6 | 18 | 7 FLORA | 20.5 | 78.1 | 85  | 0    |
| 1963 | 10 7 | 0  | 7 FLORA | 20.6 | 78.3 | 85  | 0    |



|                       |      |      |     |      |
|-----------------------|------|------|-----|------|
| 1963 10 7 6 7 FLORA   | 20.7 | 78.2 | 80  | 0    |
| 1963 10 7 12 7 FLORA  | 20.8 | 78.1 | 80  | 986  |
| 1963 10 7 18 7 FLORA  | 21.0 | 78.0 | 75  | 0    |
| 1963 10 8 0 7 FLORA   | 21.3 | 77.7 | 75  | 0    |
| 1963 10 8 6 7 FLORA   | 21.2 | 77.0 | 75  | 989  |
| 1963 10 8 12 7 FLORA  | 21.1 | 76.2 | 70  | 990  |
| 1963 10 8 18 7 FLORA  | 21.5 | 75.4 | 75  | 990  |
| 1963 10 9 0 7 FLORA   | 21.7 | 74.4 | 75  | 983  |
| 1963 10 9 6 7 FLORA   | 22.3 | 72.8 | 75  | 0    |
| 1963 10 9 12 7 FLORA  | 23.5 | 71.6 | 80  | 975  |
| 1963 10 9 18 7 FLORA  | 25.0 | 70.0 | 85  | 965  |
| 1963 10 10 0 7 FLORA  | 26.0 | 68.3 | 95  | 965  |
| 1963 10 10 6 7 FLORA  | 27.1 | 66.5 | 95  | 969  |
| 1963 10 10 12 7 FLORA | 28.1 | 64.9 | 100 | 969  |
| 1963 10 10 18 7 FLORA | 29.9 | 62.2 | 100 | 972  |
| 1963 10 11 0 7 FLORA  | 32.2 | 59.8 | 95  | 0    |
| 1963 10 11 6 7 FLORA  | 34.3 | 58.3 | 90  | 970  |
| 1963 10 11 12 7 FLORA | 36.2 | 57.0 | 85  | 963  |
| 1963 10 11 18 7 FLORA | 38.3 | 56.0 | 80  | 963  |
| 1963 10 12 0 7 FLORA  | 40.1 | 54.0 | 80  | 0    |
| 1963 10 12 6 7 FLORA  | 42.0 | 52.0 | 75  | 0    |
| 1963 10 12 12 7 FLORA | 43.5 | 49.8 | 75  | 985  |
| 1963 10 12 18 7 FLORA | 45.2 | 47.5 | 75  | 0    |
| 1963 10 13 0 7 FLORA  | 47.0 | 45.0 | 70  | 0    |
| 1963 10 13 6 7 FLORA  | 49.2 | 42.8 | 70  | 0    |
| 1963 10 13 12 7 FLORA | 51.5 | 41.0 | 70  | 0    |
| 1963 10 16 12 8 GINNY | 21.0 | 72.0 | 20  | 0    |
| 1963 10 16 18 8 GINNY | 21.8 | 71.9 | 20  | 0    |
| 1963 10 17 0 8 GINNY  | 22.5 | 71.8 | 20  | 0    |
| 1963 10 17 6 8 GINNY  | 23.3 | 71.7 | 20  | 0    |
| 1963 10 17 12 8 GINNY | 24.0 | 71.6 | 20  | 0    |
| 1963 10 17 18 8 GINNY | 24.8 | 71.5 | 20  | 0    |
| 1963 10 18 0 8 GINNY  | 25.5 | 71.4 | 20  | 0    |
| 1963 10 18 6 8 GINNY  | 26.3 | 71.3 | 25  | 0    |
| 1963 10 18 12 8 GINNY | 27.0 | 71.2 | 30  | 0    |
| 1963 10 18 18 8 GINNY | 27.8 | 71.2 | 30  | 0    |
| 1963 10 19 0 8 GINNY  | 28.5 | 71.2 | 30  | 0    |
| 1963 10 19 6 8 GINNY  | 29.5 | 71.3 | 30  | 0    |
| 1963 10 19 12 8 GINNY | 30.8 | 71.8 | 35  | 1000 |
| 1963 10 19 18 8 GINNY | 32.2 | 72.6 | 45  | 0    |
| 1963 10 20 0 8 GINNY  | 33.4 | 73.5 | 55  | 0    |
| 1963 10 20 6 8 GINNY  | 33.6 | 74.3 | 60  | 0    |
| 1963 10 20 12 8 GINNY | 33.5 | 75.0 | 65  | 983  |
| 1963 10 20 18 8 GINNY | 33.8 | 75.5 | 70  | 0    |

|               |          |      |      |    |      |
|---------------|----------|------|------|----|------|
| 1963 10 21 0  | 8 GINNY  | 34.0 | 75.5 | 75 | 0    |
| 1963 10 21 6  | 8 GINNY  | 34.2 | 75.0 | 75 | 0    |
| 1963 10 21 12 | 8 GINNY  | 34.0 | 74.5 | 75 | 0    |
| 1963 10 21 18 | 8 GINNY  | 33.6 | 74.2 | 75 | 0    |
| 1963 10 22 0  | 8 GINNY  | 33.0 | 74.0 | 70 | 0    |
| 1963 10 22 6  | 8 GINNY  | 32.2 | 74.4 | 70 | 0    |
| 1963 10 22 12 | 8 GINNY  | 31.5 | 74.8 | 70 | 0    |
| 1963 10 22 18 | 8 GINNY  | 30.8 | 75.3 | 70 | 989  |
| 1963 10 23 0  | 8 GINNY  | 30.3 | 76.0 | 65 | 987  |
| 1963 10 23 6  | 8 GINNY  | 29.6 | 76.9 | 60 | 988  |
| 1963 10 23 12 | 8 GINNY  | 28.9 | 77.7 | 60 | 995  |
| 1963 10 23 18 | 8 GINNY  | 28.8 | 78.2 | 65 | 990  |
| 1963 10 24 0  | 8 GINNY  | 28.8 | 78.5 | 65 | 988  |
| 1963 10 24 6  | 8 GINNY  | 29.0 | 79.0 | 65 | 0    |
| 1963 10 24 12 | 8 GINNY  | 29.4 | 79.6 | 65 | 990  |
| 1963 10 24 18 | 8 GINNY  | 29.8 | 79.7 | 70 | 987  |
| 1963 10 25 0  | 8 GINNY  | 30.3 | 79.6 | 75 | 982  |
| 1963 10 25 6  | 8 GINNY  | 31.1 | 79.7 | 85 | 0    |
| 1963 10 25 12 | 8 GINNY  | 31.8 | 79.6 | 90 | 976  |
| 1963 10 25 18 | 8 GINNY  | 32.1 | 79.0 | 90 | 985  |
| 1963 10 26 0  | 8 GINNY  | 32.4 | 78.1 | 85 | 0    |
| 1963 10 26 6  | 8 GINNY  | 33.2 | 77.3 | 80 | 988  |
| 1963 10 26 12 | 8 GINNY  | 33.2 | 76.9 | 80 | 986  |
| 1963 10 26 18 | 8 GINNY  | 32.9 | 76.5 | 75 | 978  |
| 1963 10 27 0  | 8 GINNY  | 33.0 | 76.0 | 70 | 979  |
| 1963 10 27 6  | 8 GINNY  | 32.9 | 75.9 | 70 | 980  |
| 1963 10 27 12 | 8 GINNY  | 32.9 | 75.3 | 70 | 972  |
| 1963 10 27 18 | 8 GINNY  | 32.7 | 74.6 | 75 | 975  |
| 1963 10 28 0  | 8 GINNY  | 32.6 | 73.4 | 75 | 0    |
| 1963 10 28 6  | 8 GINNY  | 33.2 | 72.9 | 80 | 0    |
| 1963 10 28 12 | 8 GINNY  | 33.9 | 72.3 | 80 | 968  |
| 1963 10 28 18 | 8 GINNY  | 35.1 | 71.5 | 85 | 963  |
| 1963 10 29 0  | 8 GINNY  | 36.3 | 70.3 | 95 | 0    |
| 1963 10 29 6  | 8 GINNY  | 37.8 | 68.8 | 95 | 0    |
| 1963 10 29 12 | 8 GINNY  | 40.8 | 67.2 | 95 | 958  |
| 1963 10 29 18 | 8 GINNY  | 44.0 | 66.0 | 90 | 0    |
| 1963 10 30 0  | 8 GINNY  | 47.0 | 64.0 | 80 | 0    |
| 1963 10 30 6  | 8 GINNY  | 49.0 | 63.0 | 80 | 0    |
| 1963 10 25 12 | 9 HELENA | 15.2 | 58.9 | 25 | 0    |
| 1963 10 25 18 | 9 HELENA | 15.3 | 59.4 | 35 | 1005 |
| 1963 10 26 0  | 9 HELENA | 15.4 | 60.1 | 40 | 1001 |
| 1963 10 26 6  | 9 HELENA | 15.5 | 60.6 | 45 | 0    |
| 1963 10 26 12 | 9 HELENA | 15.6 | 61.2 | 30 | 0    |
| 1963 10 26 18 | 9 HELENA | 15.7 | 61.6 | 30 | 0    |

|      |    |    |    |   |           |      |      |    |      |
|------|----|----|----|---|-----------|------|------|----|------|
| 1963 | 10 | 27 | 0  | 9 | HELENA    | 15.7 | 62.1 | 30 | 1006 |
| 1963 | 10 | 27 | 6  | 9 | HELENA    | 15.9 | 62.2 | 30 | 0    |
| 1963 | 10 | 27 | 12 | 9 | HELENA    | 16.1 | 62.3 | 35 | 0    |
| 1963 | 10 | 27 | 18 | 9 | HELENA    | 16.5 | 62.1 | 35 | 0    |
| 1963 | 10 | 28 | 0  | 9 | HELENA    | 16.9 | 61.9 | 35 | 0    |
| 1963 | 10 | 28 | 6  | 9 | HELENA    | 17.2 | 61.4 | 35 | 0    |
| 1963 | 10 | 28 | 12 | 9 | HELENA    | 17.5 | 61.0 | 35 | 0    |
| 1963 | 10 | 28 | 18 | 9 | HELENA    | 18.0 | 60.5 | 35 | 0    |
| 1963 | 10 | 29 | 0  | 9 | HELENA    | 18.6 | 60.1 | 25 | 0    |
| 1963 | 10 | 29 | 6  | 9 | HELENA    | 19.3 | 60.0 | 20 | 0    |
| 1963 | 10 | 29 | 12 | 9 | HELENA    | 20.0 | 60.0 | 20 | 0    |
| 1963 | 10 | 29 | 18 | 9 | HELENA    | 20.8 | 59.9 | 15 | 0    |
| 1964 | 6  | 2  | 12 | 1 | NOT NAMED | 17.9 | 86.1 | 25 | 0    |
| 1964 | 6  | 2  | 18 | 1 | NOT NAMED | 18.2 | 86.1 | 25 | 0    |
| 1964 | 6  | 3  | 0  | 1 | NOT NAMED | 18.4 | 86.1 | 25 | 0    |
| 1964 | 6  | 3  | 6  | 1 | NOT NAMED | 18.7 | 86.1 | 25 | 0    |
| 1964 | 6  | 3  | 12 | 1 | NOT NAMED | 18.9 | 86.1 | 25 | 0    |
| 1964 | 6  | 3  | 18 | 1 | NOT NAMED | 19.2 | 86.1 | 25 | 0    |
| 1964 | 6  | 4  | 0  | 1 | NOT NAMED | 19.4 | 86.0 | 25 | 0    |
| 1964 | 6  | 4  | 6  | 1 | NOT NAMED | 19.6 | 86.0 | 25 | 0    |
| 1964 | 6  | 4  | 12 | 1 | NOT NAMED | 19.8 | 86.0 | 25 | 0    |
| 1964 | 6  | 4  | 18 | 1 | NOT NAMED | 20.7 | 86.0 | 25 | 0    |
| 1964 | 6  | 5  | 0  | 1 | NOT NAMED | 21.8 | 85.9 | 25 | 0    |
| 1964 | 6  | 5  | 6  | 1 | NOT NAMED | 22.6 | 85.8 | 25 | 0    |
| 1964 | 6  | 5  | 12 | 1 | NOT NAMED | 23.5 | 85.6 | 25 | 0    |
| 1964 | 6  | 5  | 18 | 1 | NOT NAMED | 24.8 | 85.3 | 25 | 0    |
| 1964 | 6  | 6  | 0  | 1 | NOT NAMED | 26.1 | 85.0 | 25 | 0    |
| 1964 | 6  | 6  | 6  | 1 | NOT NAMED | 27.4 | 84.6 | 30 | 0    |
| 1964 | 6  | 6  | 12 | 1 | NOT NAMED | 28.7 | 83.9 | 30 | 0    |
| 1964 | 6  | 6  | 18 | 1 | NOT NAMED | 29.8 | 82.5 | 30 | 0    |
| 1964 | 6  | 7  | 0  | 1 | NOT NAMED | 30.7 | 81.0 | 30 | 0    |
| 1964 | 6  | 7  | 6  | 1 | NOT NAMED | 31.6 | 79.8 | 30 | 0    |
| 1964 | 6  | 7  | 12 | 1 | NOT NAMED | 32.5 | 78.6 | 35 | 0    |
| 1964 | 6  | 7  | 18 | 1 | NOT NAMED | 33.2 | 77.3 | 35 | 0    |
| 1964 | 6  | 8  | 0  | 1 | NOT NAMED | 33.8 | 76.0 | 35 | 0    |
| 1964 | 6  | 8  | 6  | 1 | NOT NAMED | 34.4 | 74.5 | 40 | 0    |
| 1964 | 6  | 8  | 12 | 1 | NOT NAMED | 34.9 | 72.7 | 45 | 0    |
| 1964 | 6  | 8  | 18 | 1 | NOT NAMED | 35.6 | 70.5 | 45 | 0    |
| 1964 | 6  | 9  | 0  | 1 | NOT NAMED | 36.3 | 68.2 | 45 | 0    |
| 1964 | 6  | 9  | 6  | 1 | NOT NAMED | 36.6 | 65.9 | 50 | 0    |
| 1964 | 6  | 9  | 12 | 1 | NOT NAMED | 36.7 | 64.0 | 50 | 0    |
| 1964 | 6  | 9  | 18 | 1 | NOT NAMED | 36.6 | 62.6 | 50 | 0    |
| 1964 | 6  | 10 | 0  | 1 | NOT NAMED | 36.5 | 61.4 | 50 | 0    |
| 1964 | 6  | 10 | 6  | 1 | NOT NAMED | 36.4 | 60.1 | 45 | 0    |

|      |         |             |      |      |    |      |
|------|---------|-------------|------|------|----|------|
| 1964 | 6 10 12 | 1 NOT NAMED | 36.5 | 58.9 | 35 | 0    |
| 1964 | 6 10 18 | 1 NOT NAMED | 37.0 | 57.7 | 35 | 0    |
| 1964 | 6 11 0  | 1 NOT NAMED | 37.7 | 56.5 | 35 | 0    |
| 1964 | 6 11 6  | 1 NOT NAMED | 38.4 | 55.9 | 35 | 0    |
| 1964 | 6 11 12 | 1 NOT NAMED | 39.0 | 55.8 | 35 | 0    |
| 1964 | 6 11 18 | 1 NOT NAMED | 39.6 | 55.8 | 35 | 0    |
| 1964 | 7 28 6  | 2 NOT NAMED | 19.1 | 43.5 | 25 | 0    |
| 1964 | 7 28 12 | 2 NOT NAMED | 19.7 | 47.8 | 30 | 0    |
| 1964 | 7 28 18 | 2 NOT NAMED | 20.2 | 50.2 | 30 | 0    |
| 1964 | 7 29 0  | 2 NOT NAMED | 20.8 | 52.5 | 30 | 0    |
| 1964 | 7 29 6  | 2 NOT NAMED | 21.4 | 54.4 | 30 | 0    |
| 1964 | 7 29 12 | 2 NOT NAMED | 22.0 | 56.0 | 30 | 1006 |
| 1964 | 7 29 18 | 2 NOT NAMED | 22.6 | 57.6 | 30 | 0    |
| 1964 | 7 30 0  | 2 NOT NAMED | 23.5 | 59.2 | 30 | 0    |
| 1964 | 7 30 6  | 2 NOT NAMED | 25.1 | 60.4 | 30 | 0    |
| 1964 | 7 30 12 | 2 NOT NAMED | 26.8 | 61.0 | 30 | 0    |
| 1964 | 7 30 18 | 2 NOT NAMED | 28.4 | 61.1 | 30 | 1012 |
| 1964 | 7 31 0  | 2 NOT NAMED | 29.8 | 60.8 | 30 | 0    |
| 1964 | 7 31 6  | 2 NOT NAMED | 31.1 | 60.2 | 30 | 0    |
| 1964 | 7 31 12 | 2 NOT NAMED | 32.4 | 59.1 | 30 | 1012 |
| 1964 | 7 31 18 | 2 NOT NAMED | 33.7 | 57.2 | 45 | 0    |
| 1964 | 8 1 0   | 2 NOT NAMED | 35.0 | 55.2 | 45 | 0    |
| 1964 | 8 1 6   | 2 NOT NAMED | 36.3 | 54.4 | 45 | 0    |
| 1964 | 8 1 12  | 2 NOT NAMED | 37.7 | 53.5 | 45 | 0    |
| 1964 | 8 1 18  | 2 NOT NAMED | 39.0 | 51.8 | 45 | 0    |
| 1964 | 8 2 0   | 2 NOT NAMED | 40.3 | 49.7 | 45 | 0    |
| 1964 | 8 2 6   | 2 NOT NAMED | 42.0 | 47.0 | 45 | 0    |
| 1964 | 8 2 12  | 2 NOT NAMED | 44.2 | 44.4 | 45 | 0    |
| 1964 | 8 2 18  | 2 NOT NAMED | 47.0 | 42.1 | 45 | 0    |
| 1964 | 8 3 0   | 2 NOT NAMED | 49.8 | 40.1 | 45 | 0    |
| 1964 | 8 3 6   | 2 NOT NAMED | 52.1 | 38.3 | 40 | 0    |
| 1964 | 8 3 12  | 2 NOT NAMED | 54.3 | 36.7 | 35 | 0    |
| 1964 | 8 5 18  | 3 ABBY      | 27.0 | 88.1 | 25 | 0    |
| 1964 | 8 6 0   | 3 ABBY      | 27.0 | 89.1 | 25 | 0    |
| 1964 | 8 6 6   | 3 ABBY      | 27.0 | 90.2 | 25 | 0    |
| 1964 | 8 6 12  | 3 ABBY      | 27.1 | 91.1 | 25 | 0    |
| 1964 | 8 6 18  | 3 ABBY      | 27.3 | 91.9 | 25 | 0    |
| 1964 | 8 7 0   | 3 ABBY      | 27.5 | 92.7 | 25 | 0    |
| 1964 | 8 7 6   | 3 ABBY      | 28.0 | 93.5 | 30 | 0    |
| 1964 | 8 7 12  | 3 ABBY      | 28.5 | 94.4 | 40 | 0    |
| 1964 | 8 7 18  | 3 ABBY      | 28.6 | 95.2 | 55 | 1000 |
| 1964 | 8 8 0   | 3 ABBY      | 28.8 | 96.1 | 55 | 0    |
| 1964 | 8 8 6   | 3 ABBY      | 28.9 | 97.3 | 25 | 0    |
| 1964 | 8 8 12  | 3 ABBY      | 28.8 | 98.0 | 25 | 0    |

|      |   |    |    |   |        |      |      |     |      |
|------|---|----|----|---|--------|------|------|-----|------|
| 1964 | 8 | 8  | 18 | 3 | ABBY   | 28.7 | 98.9 | 25  | 0    |
| 1964 | 8 | 7  | 18 | 4 | BRENDA | 32.0 | 69.0 | 25  | 0    |
| 1964 | 8 | 8  | 0  | 4 | BRENDA | 32.1 | 67.6 | 30  | 0    |
| 1964 | 8 | 8  | 6  | 4 | BRENDA | 32.2 | 66.2 | 30  | 0    |
| 1964 | 8 | 8  | 12 | 4 | BRENDA | 32.4 | 64.9 | 45  | 1008 |
| 1964 | 8 | 8  | 18 | 4 | BRENDA | 32.0 | 63.4 | 45  | 0    |
| 1964 | 8 | 9  | 0  | 4 | BRENDA | 31.4 | 62.0 | 45  | 1010 |
| 1964 | 8 | 9  | 6  | 4 | BRENDA | 31.5 | 61.3 | 45  | 0    |
| 1964 | 8 | 9  | 12 | 4 | BRENDA | 31.9 | 60.6 | 45  | 1008 |
| 1964 | 8 | 9  | 18 | 4 | BRENDA | 32.9 | 60.1 | 45  | 1006 |
| 1964 | 8 | 10 | 0  | 4 | BRENDA | 33.7 | 59.2 | 45  | 0    |
| 1964 | 8 | 10 | 6  | 4 | BRENDA | 34.4 | 57.8 | 40  | 0    |
| 1964 | 8 | 10 | 12 | 4 | BRENDA | 35.2 | 56.5 | 40  | 1010 |
| 1964 | 8 | 10 | 18 | 4 | BRENDA | 36.1 | 55.5 | 35  | 0    |
| 1964 | 8 | 20 | 18 | 5 | CLEO   | 13.1 | 44.3 | 30  | 1003 |
| 1964 | 8 | 21 | 0  | 5 | CLEO   | 13.4 | 46.8 | 35  | 0    |
| 1964 | 8 | 21 | 6  | 5 | CLEO   | 13.7 | 49.1 | 40  | 1000 |
| 1964 | 8 | 21 | 12 | 5 | CLEO   | 14.1 | 51.3 | 65  | 0    |
| 1964 | 8 | 21 | 18 | 5 | CLEO   | 14.4 | 53.5 | 70  | 993  |
| 1964 | 8 | 22 | 0  | 5 | CLEO   | 14.9 | 55.7 | 75  | 993  |
| 1964 | 8 | 22 | 6  | 5 | CLEO   | 15.3 | 57.8 | 100 | 0    |
| 1964 | 8 | 22 | 12 | 5 | CLEO   | 15.7 | 59.7 | 110 | 970  |
| 1964 | 8 | 22 | 18 | 5 | CLEO   | 16.0 | 61.9 | 115 | 962  |
| 1964 | 8 | 23 | 0  | 5 | CLEO   | 16.2 | 63.4 | 120 | 955  |
| 1964 | 8 | 23 | 6  | 5 | CLEO   | 16.3 | 65.0 | 125 | 0    |
| 1964 | 8 | 23 | 12 | 5 | CLEO   | 16.5 | 66.6 | 130 | 0    |
| 1964 | 8 | 23 | 18 | 5 | CLEO   | 16.7 | 68.0 | 135 | 950  |
| 1964 | 8 | 24 | 0  | 5 | CLEO   | 16.7 | 69.5 | 135 | 950  |
| 1964 | 8 | 24 | 6  | 5 | CLEO   | 16.9 | 70.6 | 135 | 0    |
| 1964 | 8 | 24 | 12 | 5 | CLEO   | 17.1 | 71.8 | 135 | 0    |
| 1964 | 8 | 24 | 18 | 5 | CLEO   | 17.8 | 73.1 | 130 | 0    |
| 1964 | 8 | 25 | 0  | 5 | CLEO   | 18.4 | 74.6 | 130 | 0    |
| 1964 | 8 | 25 | 6  | 5 | CLEO   | 18.9 | 75.6 | 125 | 0    |
| 1964 | 8 | 25 | 12 | 5 | CLEO   | 19.4 | 76.6 | 100 | 0    |
| 1964 | 8 | 25 | 18 | 5 | CLEO   | 20.0 | 77.6 | 70  | 0    |
| 1964 | 8 | 26 | 0  | 5 | CLEO   | 20.8 | 78.4 | 65  | 0    |
| 1964 | 8 | 26 | 6  | 5 | CLEO   | 21.5 | 78.9 | 65  | 0    |
| 1964 | 8 | 26 | 12 | 5 | CLEO   | 22.4 | 79.2 | 65  | 0    |
| 1964 | 8 | 26 | 18 | 5 | CLEO   | 23.7 | 79.6 | 80  | 987  |
| 1964 | 8 | 27 | 0  | 5 | CLEO   | 24.6 | 79.6 | 90  | 984  |
| 1964 | 8 | 27 | 6  | 5 | CLEO   | 25.5 | 79.9 | 90  | 968  |
| 1964 | 8 | 27 | 12 | 5 | CLEO   | 26.3 | 80.2 | 85  | 971  |
| 1964 | 8 | 27 | 18 | 5 | CLEO   | 27.2 | 80.6 | 75  | 0    |
| 1964 | 8 | 28 | 0  | 5 | CLEO   | 27.8 | 80.7 | 60  | 983  |

|      |         |   |        |      |      |    |     |
|------|---------|---|--------|------|------|----|-----|
| 1964 | 8 28    | 6 | 5 CLEO | 28.4 | 80.9 | 60 | 0   |
| 1964 | 8 28 12 | 5 | CLEO   | 29.5 | 81.2 | 55 | 0   |
| 1964 | 8 28 18 | 5 | CLEO   | 30.2 | 81.3 | 50 | 995 |
| 1964 | 8 29    | 0 | 5 CLEO | 30.8 | 81.3 | 45 | 999 |
| 1964 | 8 29    | 6 | 5 CLEO | 31.4 | 81.3 | 40 | 0   |
| 1964 | 8 29 12 | 5 | CLEO   | 32.0 | 81.4 | 35 | 0   |
| 1964 | 8 29 18 | 5 | CLEO   | 32.4 | 81.6 | 30 | 0   |
| 1964 | 8 30    | 0 | 5 CLEO | 32.9 | 81.9 | 30 | 0   |
| 1964 | 8 30    | 6 | 5 CLEO | 33.3 | 82.1 | 30 | 0   |
| 1964 | 8 30 12 | 5 | CLEO   | 34.0 | 82.0 | 25 | 0   |
| 1964 | 8 30 18 | 5 | CLEO   | 34.6 | 81.5 | 25 | 0   |
| 1964 | 8 31    | 0 | 5 CLEO | 35.1 | 81.1 | 25 | 0   |
| 1964 | 8 31    | 6 | 5 CLEO | 35.6 | 80.3 | 25 | 0   |
| 1964 | 8 31 12 | 5 | CLEO   | 36.0 | 79.5 | 25 | 0   |
| 1964 | 8 31 18 | 5 | CLEO   | 36.3 | 78.3 | 30 | 0   |
| 1964 | 9 1     | 0 | 5 CLEO | 36.5 | 77.0 | 30 | 0   |
| 1964 | 9 1     | 6 | 5 CLEO | 36.3 | 76.0 | 35 | 0   |
| 1964 | 9 1 12  | 5 | CLEO   | 35.8 | 75.2 | 40 | 0   |
| 1964 | 9 1 18  | 5 | CLEO   | 35.3 | 74.2 | 45 | 0   |
| 1964 | 9 2     | 0 | 5 CLEO | 35.0 | 73.2 | 55 | 0   |
| 1964 | 9 2     | 6 | 5 CLEO | 35.2 | 72.1 | 60 | 0   |
| 1964 | 9 2 12  | 5 | CLEO   | 35.4 | 71.1 | 65 | 980 |
| 1964 | 9 2 18  | 5 | CLEO   | 35.8 | 69.1 | 70 | 0   |
| 1964 | 9 3     | 0 | 5 CLEO | 35.9 | 67.5 | 70 | 0   |
| 1964 | 9 3     | 6 | 5 CLEO | 36.5 | 65.4 | 70 | 980 |
| 1964 | 9 3 12  | 5 | CLEO   | 37.1 | 63.5 | 70 | 983 |
| 1964 | 9 3 18  | 5 | CLEO   | 37.8 | 61.0 | 70 | 982 |
| 1964 | 9 4     | 0 | 5 CLEO | 38.7 | 56.9 | 75 | 0   |
| 1964 | 9 4     | 6 | 5 CLEO | 41.0 | 53.0 | 75 | 0   |
| 1964 | 9 4 12  | 5 | CLEO   | 44.7 | 50.5 | 75 | 970 |
| 1964 | 9 4 18  | 5 | CLEO   | 46.9 | 49.8 | 70 | 0   |
| 1964 | 9 5     | 0 | 5 CLEO | 48.8 | 49.5 | 65 | 0   |
| 1964 | 9 5     | 6 | 5 CLEO | 51.3 | 48.8 | 65 | 0   |
| 1964 | 9 5 12  | 5 | CLEO   | 53.5 | 48.0 | 60 | 0   |
| 1964 | 8 28 12 | 6 | DORA   | 14.0 | 18.0 | 25 | 0   |
| 1964 | 8 28 18 | 6 | DORA   | 13.6 | 20.0 | 25 | 0   |
| 1964 | 8 29    | 0 | 6 DORA | 13.1 | 22.0 | 25 | 0   |
| 1964 | 8 29    | 6 | 6 DORA | 12.8 | 24.0 | 25 | 0   |
| 1964 | 8 29 12 | 6 | DORA   | 12.4 | 26.0 | 25 | 0   |
| 1964 | 8 29 18 | 6 | DORA   | 12.1 | 27.5 | 25 | 0   |
| 1964 | 8 30    | 0 | 6 DORA | 11.8 | 29.6 | 25 | 0   |
| 1964 | 8 30    | 6 | 6 DORA | 11.7 | 31.7 | 25 | 0   |
| 1964 | 8 30 12 | 6 | DORA   | 11.5 | 33.3 | 25 | 0   |
| 1964 | 8 30 18 | 6 | DORA   | 11.4 | 35.0 | 25 | 0   |

|      |      |    |        |      |      |     |     |
|------|------|----|--------|------|------|-----|-----|
| 1964 | 8 31 | 0  | 6 DORA | 11.2 | 37.0 | 25  | 0   |
| 1964 | 8 31 | 6  | 6 DORA | 11.1 | 39.0 | 25  | 0   |
| 1964 | 8 31 | 12 | 6 DORA | 11.0 | 41.0 | 30  | 0   |
| 1964 | 8 31 | 18 | 6 DORA | 11.1 | 42.5 | 30  | 0   |
| 1964 | 9 1  | 0  | 6 DORA | 11.3 | 44.0 | 30  | 0   |
| 1964 | 9 1  | 6  | 6 DORA | 11.5 | 45.5 | 30  | 0   |
| 1964 | 9 1  | 12 | 6 DORA | 11.7 | 47.0 | 50  | 0   |
| 1964 | 9 1  | 18 | 6 DORA | 12.7 | 48.7 | 55  | 998 |
| 1964 | 9 2  | 0  | 6 DORA | 13.3 | 49.6 | 60  | 0   |
| 1964 | 9 2  | 6  | 6 DORA | 14.2 | 51.2 | 60  | 0   |
| 1964 | 9 2  | 12 | 6 DORA | 15.3 | 53.0 | 60  | 996 |
| 1964 | 9 2  | 18 | 6 DORA | 16.5 | 54.9 | 60  | 0   |
| 1964 | 9 3  | 0  | 6 DORA | 17.8 | 56.5 | 80  | 0   |
| 1964 | 9 3  | 6  | 6 DORA | 18.2 | 57.3 | 85  | 984 |
| 1964 | 9 3  | 12 | 6 DORA | 18.7 | 58.0 | 90  | 984 |
| 1964 | 9 3  | 18 | 6 DORA | 19.6 | 58.9 | 90  | 0   |
| 1964 | 9 4  | 0  | 6 DORA | 20.5 | 59.5 | 95  | 981 |
| 1964 | 9 4  | 6  | 6 DORA | 21.1 | 59.9 | 95  | 994 |
| 1964 | 9 4  | 12 | 6 DORA | 21.6 | 60.3 | 95  | 976 |
| 1964 | 9 4  | 18 | 6 DORA | 22.2 | 60.8 | 95  | 973 |
| 1964 | 9 5  | 0  | 6 DORA | 22.8 | 61.2 | 95  | 0   |
| 1964 | 9 5  | 6  | 6 DORA | 23.4 | 61.6 | 95  | 0   |
| 1964 | 9 5  | 12 | 6 DORA | 24.0 | 62.1 | 100 | 971 |
| 1964 | 9 5  | 18 | 6 DORA | 24.8 | 62.9 | 105 | 960 |
| 1964 | 9 6  | 0  | 6 DORA | 25.5 | 63.6 | 110 | 0   |
| 1964 | 9 6  | 6  | 6 DORA | 26.1 | 64.4 | 115 | 942 |
| 1964 | 9 6  | 12 | 6 DORA | 26.7 | 65.2 | 115 | 0   |
| 1964 | 9 6  | 18 | 6 DORA | 27.1 | 66.1 | 110 | 958 |
| 1964 | 9 7  | 0  | 6 DORA | 27.4 | 67.0 | 100 | 0   |
| 1964 | 9 7  | 6  | 6 DORA | 27.8 | 67.9 | 95  | 0   |
| 1964 | 9 7  | 12 | 6 DORA | 28.0 | 69.0 | 95  | 964 |
| 1964 | 9 7  | 18 | 6 DORA | 28.1 | 70.2 | 95  | 956 |
| 1964 | 9 8  | 0  | 6 DORA | 28.2 | 71.8 | 100 | 0   |
| 1964 | 9 8  | 6  | 6 DORA | 28.5 | 73.0 | 100 | 0   |
| 1964 | 9 8  | 12 | 6 DORA | 28.6 | 74.4 | 100 | 0   |
| 1964 | 9 8  | 18 | 6 DORA | 28.6 | 75.9 | 100 | 963 |
| 1964 | 9 9  | 0  | 6 DORA | 28.8 | 77.4 | 100 | 0   |
| 1964 | 9 9  | 6  | 6 DORA | 29.0 | 78.3 | 100 | 972 |
| 1964 | 9 9  | 12 | 6 DORA | 29.4 | 79.4 | 100 | 970 |
| 1964 | 9 9  | 18 | 6 DORA | 29.7 | 80.0 | 100 | 962 |
| 1964 | 9 10 | 0  | 6 DORA | 29.8 | 80.7 | 100 | 964 |
| 1964 | 9 10 | 6  | 6 DORA | 29.9 | 81.4 | 95  | 966 |
| 1964 | 9 10 | 12 | 6 DORA | 30.0 | 82.4 | 90  | 0   |
| 1964 | 9 10 | 18 | 6 DORA | 30.1 | 83.1 | 80  | 0   |

|      |      |    |         |      |      |     |      |
|------|------|----|---------|------|------|-----|------|
| 1964 | 9 11 | 0  | 6 DORA  | 30.1 | 83.5 | 70  | 0    |
| 1964 | 9 11 | 6  | 6 DORA  | 30.2 | 84.0 | 55  | 0    |
| 1964 | 9 11 | 12 | 6 DORA  | 30.5 | 84.5 | 45  | 0    |
| 1964 | 9 11 | 18 | 6 DORA  | 31.1 | 84.9 | 35  | 0    |
| 1964 | 9 12 | 0  | 6 DORA  | 31.5 | 85.0 | 35  | 0    |
| 1964 | 9 12 | 6  | 6 DORA  | 31.6 | 84.8 | 35  | 0    |
| 1964 | 9 12 | 12 | 6 DORA  | 31.5 | 84.6 | 35  | 0    |
| 1964 | 9 12 | 18 | 6 DORA  | 31.9 | 83.3 | 35  | 0    |
| 1964 | 9 13 | 0  | 6 DORA  | 32.2 | 82.2 | 35  | 0    |
| 1964 | 9 13 | 6  | 6 DORA  | 32.9 | 81.0 | 40  | 0    |
| 1964 | 9 13 | 12 | 6 DORA  | 33.7 | 79.8 | 45  | 0    |
| 1964 | 9 13 | 18 | 6 DORA  | 34.4 | 77.9 | 45  | 0    |
| 1964 | 9 14 | 0  | 6 DORA  | 35.6 | 75.3 | 50  | 998  |
| 1964 | 9 14 | 6  | 6 DORA  | 36.9 | 73.3 | 50  | 0    |
| 1964 | 9 14 | 12 | 6 DORA  | 38.0 | 71.5 | 55  | 0    |
| 1964 | 9 14 | 18 | 6 DORA  | 40.6 | 68.1 | 55  | 0    |
| 1964 | 9 15 | 0  | 6 DORA  | 43.0 | 64.6 | 55  | 0    |
| 1964 | 9 15 | 6  | 6 DORA  | 44.6 | 61.7 | 55  | 0    |
| 1964 | 9 15 | 12 | 6 DORA  | 46.0 | 59.0 | 55  | 0    |
| 1964 | 9 15 | 18 | 6 DORA  | 47.6 | 55.6 | 55  | 0    |
| 1964 | 9 16 | 0  | 6 DORA  | 49.0 | 52.0 | 55  | 0    |
| 1964 | 9 4  | 6  | 7 ETHEL | 17.7 | 35.4 | 25  | 0    |
| 1964 | 9 4  | 12 | 7 ETHEL | 18.0 | 37.0 | 35  | 0    |
| 1964 | 9 4  | 18 | 7 ETHEL | 18.4 | 38.4 | 35  | 0    |
| 1964 | 9 5  | 0  | 7 ETHEL | 18.8 | 39.9 | 35  | 0    |
| 1964 | 9 5  | 6  | 7 ETHEL | 19.2 | 41.5 | 35  | 0    |
| 1964 | 9 5  | 12 | 7 ETHEL | 19.5 | 43.0 | 35  | 0    |
| 1964 | 9 5  | 18 | 7 ETHEL | 19.9 | 44.7 | 35  | 1005 |
| 1964 | 9 6  | 0  | 7 ETHEL | 20.3 | 46.4 | 35  | 0    |
| 1964 | 9 6  | 6  | 7 ETHEL | 21.2 | 47.9 | 35  | 0    |
| 1964 | 9 6  | 12 | 7 ETHEL | 22.0 | 49.5 | 35  | 0    |
| 1964 | 9 6  | 18 | 7 ETHEL | 22.8 | 51.0 | 40  | 0    |
| 1964 | 9 7  | 0  | 7 ETHEL | 23.5 | 52.5 | 45  | 1002 |
| 1964 | 9 7  | 6  | 7 ETHEL | 24.4 | 54.3 | 65  | 0    |
| 1964 | 9 7  | 12 | 7 ETHEL | 25.3 | 56.0 | 65  | 1007 |
| 1964 | 9 7  | 18 | 7 ETHEL | 26.1 | 57.5 | 65  | 0    |
| 1964 | 9 8  | 0  | 7 ETHEL | 26.9 | 59.0 | 65  | 0    |
| 1964 | 9 8  | 6  | 7 ETHEL | 27.3 | 59.7 | 65  | 0    |
| 1964 | 9 8  | 12 | 7 ETHEL | 27.5 | 60.3 | 70  | 999  |
| 1964 | 9 8  | 18 | 7 ETHEL | 27.6 | 60.8 | 75  | 986  |
| 1964 | 9 9  | 0  | 7 ETHEL | 27.6 | 61.2 | 85  | 0    |
| 1964 | 9 9  | 6  | 7 ETHEL | 27.7 | 61.5 | 90  | 989  |
| 1964 | 9 9  | 12 | 7 ETHEL | 27.7 | 62.4 | 95  | 984  |
| 1964 | 9 9  | 18 | 7 ETHEL | 27.7 | 63.2 | 100 | 0    |



|      |   |    |    |   |          |      |      |     |     |
|------|---|----|----|---|----------|------|------|-----|-----|
| 1964 | 9 | 10 | 0  | 7 | ETHEL    | 27.6 | 64.0 | 100 | 0   |
| 1964 | 9 | 10 | 6  | 7 | ETHEL    | 27.4 | 64.8 | 95  | 0   |
| 1964 | 9 | 10 | 12 | 7 | ETHEL    | 27.2 | 65.6 | 90  | 976 |
| 1964 | 9 | 10 | 18 | 7 | ETHEL    | 27.3 | 66.0 | 85  | 977 |
| 1964 | 9 | 11 | 0  | 7 | ETHEL    | 27.4 | 66.2 | 80  | 0   |
| 1964 | 9 | 11 | 6  | 7 | ETHEL    | 27.8 | 66.3 | 80  | 0   |
| 1964 | 9 | 11 | 12 | 7 | ETHEL    | 28.2 | 66.5 | 75  | 983 |
| 1964 | 9 | 11 | 18 | 7 | ETHEL    | 28.9 | 66.8 | 75  | 977 |
| 1964 | 9 | 12 | 0  | 7 | ETHEL    | 29.7 | 67.0 | 80  | 0   |
| 1964 | 9 | 12 | 6  | 7 | ETHEL    | 30.3 | 67.2 | 90  | 0   |
| 1964 | 9 | 12 | 12 | 7 | ETHEL    | 31.0 | 67.3 | 90  | 974 |
| 1964 | 9 | 12 | 18 | 7 | ETHEL    | 31.9 | 66.9 | 90  | 976 |
| 1964 | 9 | 13 | 0  | 7 | ETHEL    | 32.9 | 66.1 | 90  | 0   |
| 1964 | 9 | 13 | 6  | 7 | ETHEL    | 34.0 | 64.9 | 85  | 0   |
| 1964 | 9 | 13 | 12 | 7 | ETHEL    | 35.5 | 63.1 | 85  | 0   |
| 1964 | 9 | 13 | 18 | 7 | ETHEL    | 37.0 | 61.3 | 80  | 0   |
| 1964 | 9 | 14 | 0  | 7 | ETHEL    | 38.4 | 59.4 | 80  | 0   |
| 1964 | 9 | 14 | 6  | 7 | ETHEL    | 40.0 | 57.2 | 80  | 0   |
| 1964 | 9 | 14 | 12 | 7 | ETHEL    | 41.5 | 54.8 | 75  | 0   |
| 1964 | 9 | 14 | 18 | 7 | ETHEL    | 42.9 | 51.9 | 75  | 969 |
| 1964 | 9 | 15 | 0  | 7 | ETHEL    | 44.0 | 49.0 | 75  | 0   |
| 1964 | 9 | 15 | 6  | 7 | ETHEL    | 44.8 | 45.7 | 75  | 0   |
| 1964 | 9 | 15 | 12 | 7 | ETHEL    | 45.2 | 42.2 | 70  | 0   |
| 1964 | 9 | 15 | 18 | 7 | ETHEL    | 45.5 | 38.3 | 70  | 0   |
| 1964 | 9 | 16 | 0  | 7 | ETHEL    | 45.8 | 34.8 | 70  | 0   |
| 1964 | 9 | 16 | 6  | 7 | ETHEL    | 45.9 | 30.7 | 70  | 0   |
| 1964 | 9 | 5  | 18 | 8 | FLORENCE | 16.3 | 19.7 | 20  | 0   |
| 1964 | 9 | 6  | 0  | 8 | FLORENCE | 16.5 | 21.0 | 20  | 0   |
| 1964 | 9 | 6  | 6  | 8 | FLORENCE | 16.8 | 22.3 | 20  | 0   |
| 1964 | 9 | 6  | 12 | 8 | FLORENCE | 17.1 | 23.5 | 20  | 0   |
| 1964 | 9 | 6  | 18 | 8 | FLORENCE | 17.5 | 24.5 | 25  | 0   |
| 1964 | 9 | 7  | 0  | 8 | FLORENCE | 18.1 | 25.5 | 30  | 0   |
| 1964 | 9 | 7  | 6  | 8 | FLORENCE | 18.9 | 26.5 | 30  | 0   |
| 1964 | 9 | 7  | 12 | 8 | FLORENCE | 19.8 | 27.5 | 30  | 0   |
| 1964 | 9 | 7  | 18 | 8 | FLORENCE | 20.6 | 28.5 | 30  | 0   |
| 1964 | 9 | 8  | 0  | 8 | FLORENCE | 21.4 | 29.4 | 35  | 0   |
| 1964 | 9 | 8  | 6  | 8 | FLORENCE | 22.5 | 29.9 | 40  | 0   |
| 1964 | 9 | 8  | 12 | 8 | FLORENCE | 23.8 | 29.9 | 40  | 0   |
| 1964 | 9 | 8  | 18 | 8 | FLORENCE | 25.2 | 29.7 | 40  | 0   |
| 1964 | 9 | 9  | 0  | 8 | FLORENCE | 26.7 | 29.3 | 40  | 0   |
| 1964 | 9 | 9  | 6  | 8 | FLORENCE | 28.2 | 28.7 | 40  | 0   |
| 1964 | 9 | 9  | 12 | 8 | FLORENCE | 29.7 | 28.2 | 40  | 0   |
| 1964 | 9 | 9  | 18 | 8 | FLORENCE | 31.2 | 27.7 | 35  | 0   |
| 1964 | 9 | 10 | 0  | 8 | FLORENCE | 32.6 | 27.2 | 35  | 0   |

|      |      |      |          |      |      |     |      |
|------|------|------|----------|------|------|-----|------|
| 1964 | 9 10 | 6 8  | FLORENCE | 33.5 | 26.0 | 35  | 0    |
| 1964 | 9 13 | 6 9  | GLADYS   | 14.7 | 44.3 | 30  | 0    |
| 1964 | 9 13 | 12 9 | GLADYS   | 15.4 | 46.0 | 55  | 0    |
| 1964 | 9 13 | 18 9 | GLADYS   | 16.1 | 47.4 | 60  | 0    |
| 1964 | 9 14 | 0 9  | GLADYS   | 17.0 | 49.0 | 60  | 0    |
| 1964 | 9 14 | 6 9  | GLADYS   | 17.9 | 50.6 | 60  | 0    |
| 1964 | 9 14 | 12 9 | GLADYS   | 18.8 | 52.1 | 85  | 992  |
| 1964 | 9 14 | 18 9 | GLADYS   | 19.6 | 53.5 | 85  | 994  |
| 1964 | 9 15 | 0 9  | GLADYS   | 20.2 | 54.6 | 80  | 0    |
| 1964 | 9 15 | 6 9  | GLADYS   | 20.8 | 55.4 | 75  | 0    |
| 1964 | 9 15 | 12 9 | GLADYS   | 21.3 | 56.1 | 70  | 996  |
| 1964 | 9 15 | 18 9 | GLADYS   | 21.8 | 57.2 | 70  | 992  |
| 1964 | 9 16 | 0 9  | GLADYS   | 22.3 | 58.2 | 70  | 0    |
| 1964 | 9 16 | 6 9  | GLADYS   | 22.7 | 59.1 | 70  | 0    |
| 1964 | 9 16 | 12 9 | GLADYS   | 23.1 | 60.0 | 70  | 995  |
| 1964 | 9 16 | 18 9 | GLADYS   | 23.4 | 61.0 | 75  | 0    |
| 1964 | 9 17 | 0 9  | GLADYS   | 23.8 | 62.1 | 75  | 1001 |
| 1964 | 9 17 | 6 9  | GLADYS   | 24.2 | 63.1 | 85  | 0    |
| 1964 | 9 17 | 12 9 | GLADYS   | 24.6 | 64.1 | 120 | 954  |
| 1964 | 9 17 | 18 9 | GLADYS   | 25.0 | 65.1 | 125 | 945  |
| 1964 | 9 18 | 0 9  | GLADYS   | 25.4 | 65.9 | 125 | 951  |
| 1964 | 9 18 | 6 9  | GLADYS   | 25.8 | 66.5 | 125 | 951  |
| 1964 | 9 18 | 12 9 | GLADYS   | 26.1 | 67.1 | 120 | 952  |
| 1964 | 9 18 | 18 9 | GLADYS   | 26.4 | 67.7 | 120 | 953  |
| 1964 | 9 19 | 0 9  | GLADYS   | 26.8 | 68.3 | 115 | 962  |
| 1964 | 9 19 | 6 9  | GLADYS   | 27.1 | 68.8 | 110 | 951  |
| 1964 | 9 19 | 12 9 | GLADYS   | 27.3 | 69.2 | 110 | 960  |
| 1964 | 9 19 | 18 9 | GLADYS   | 27.6 | 69.6 | 105 | 962  |
| 1964 | 9 20 | 0 9  | GLADYS   | 27.9 | 69.8 | 100 | 962  |
| 1964 | 9 20 | 6 9  | GLADYS   | 28.4 | 69.8 | 95  | 965  |
| 1964 | 9 20 | 12 9 | GLADYS   | 29.0 | 69.8 | 95  | 967  |
| 1964 | 9 20 | 18 9 | GLADYS   | 29.4 | 69.7 | 90  | 964  |
| 1964 | 9 21 | 0 9  | GLADYS   | 29.8 | 69.6 | 90  | 964  |
| 1964 | 9 21 | 6 9  | GLADYS   | 30.4 | 69.6 | 85  | 0    |
| 1964 | 9 21 | 12 9 | GLADYS   | 31.1 | 69.8 | 85  | 980  |
| 1964 | 9 21 | 18 9 | GLADYS   | 32.2 | 70.4 | 80  | 977  |
| 1964 | 9 22 | 0 9  | GLADYS   | 33.1 | 71.0 | 80  | 984  |
| 1964 | 9 22 | 6 9  | GLADYS   | 33.5 | 71.4 | 75  | 980  |
| 1964 | 9 22 | 12 9 | GLADYS   | 33.9 | 71.8 | 75  | 984  |
| 1964 | 9 22 | 18 9 | GLADYS   | 34.3 | 72.1 | 70  | 982  |
| 1964 | 9 23 | 0 9  | GLADYS   | 34.8 | 72.4 | 75  | 980  |
| 1964 | 9 23 | 6 9  | GLADYS   | 35.5 | 72.4 | 75  | 977  |
| 1964 | 9 23 | 12 9 | GLADYS   | 36.5 | 71.9 | 75  | 982  |
| 1964 | 9 23 | 18 9 | GLADYS   | 37.7 | 70.7 | 70  | 974  |

|      |    |    |    |    |        |      |      |     |      |
|------|----|----|----|----|--------|------|------|-----|------|
| 1964 | 9  | 24 | 0  | 9  | GLADYS | 39.2 | 69.0 | 65  | 980  |
| 1964 | 9  | 24 | 6  | 9  | GLADYS | 40.9 | 66.9 | 65  | 982  |
| 1964 | 9  | 24 | 12 | 9  | GLADYS | 42.8 | 64.2 | 65  | 973  |
| 1964 | 9  | 24 | 18 | 9  | GLADYS | 44.7 | 60.3 | 60  | 990  |
| 1964 | 9  | 25 | 0  | 9  | GLADYS | 47.5 | 54.9 | 60  | 0    |
| 1964 | 9  | 28 | 12 | 10 | HILDA  | 21.2 | 80.0 | 15  | 0    |
| 1964 | 9  | 28 | 18 | 10 | HILDA  | 21.3 | 81.1 | 20  | 0    |
| 1964 | 9  | 29 | 0  | 10 | HILDA  | 21.4 | 82.1 | 20  | 0    |
| 1964 | 9  | 29 | 6  | 10 | HILDA  | 21.7 | 83.2 | 25  | 0    |
| 1964 | 9  | 29 | 12 | 10 | HILDA  | 22.0 | 84.2 | 35  | 0    |
| 1964 | 9  | 29 | 18 | 10 | HILDA  | 22.3 | 85.3 | 40  | 0    |
| 1964 | 9  | 30 | 0  | 10 | HILDA  | 22.8 | 86.1 | 50  | 997  |
| 1964 | 9  | 30 | 6  | 10 | HILDA  | 23.2 | 87.3 | 60  | 994  |
| 1964 | 9  | 30 | 12 | 10 | HILDA  | 23.4 | 88.1 | 70  | 984  |
| 1964 | 9  | 30 | 18 | 10 | HILDA  | 23.8 | 89.0 | 80  | 978  |
| 1964 | 10 | 1  | 0  | 10 | HILDA  | 24.0 | 89.5 | 95  | 977  |
| 1964 | 10 | 1  | 6  | 10 | HILDA  | 24.2 | 90.1 | 110 | 955  |
| 1964 | 10 | 1  | 12 | 10 | HILDA  | 24.5 | 90.6 | 120 | 951  |
| 1964 | 10 | 1  | 18 | 10 | HILDA  | 24.8 | 91.1 | 130 | 941  |
| 1964 | 10 | 2  | 0  | 10 | HILDA  | 25.2 | 91.4 | 130 | 942  |
| 1964 | 10 | 2  | 6  | 10 | HILDA  | 25.7 | 91.7 | 125 | 0    |
| 1964 | 10 | 2  | 12 | 10 | HILDA  | 26.3 | 91.7 | 120 | 0    |
| 1964 | 10 | 2  | 18 | 10 | HILDA  | 26.8 | 91.7 | 115 | 0    |
| 1964 | 10 | 3  | 0  | 10 | HILDA  | 27.2 | 91.4 | 110 | 960  |
| 1964 | 10 | 3  | 6  | 10 | HILDA  | 27.7 | 91.4 | 105 | 964  |
| 1964 | 10 | 3  | 12 | 10 | HILDA  | 28.2 | 91.4 | 100 | 962  |
| 1964 | 10 | 3  | 18 | 10 | HILDA  | 28.6 | 91.6 | 100 | 961  |
| 1964 | 10 | 4  | 0  | 10 | HILDA  | 29.6 | 91.6 | 95  | 959  |
| 1964 | 10 | 4  | 6  | 10 | HILDA  | 30.2 | 91.2 | 60  | 0    |
| 1964 | 10 | 4  | 12 | 10 | HILDA  | 30.6 | 90.6 | 60  | 0    |
| 1964 | 10 | 4  | 18 | 10 | HILDA  | 30.7 | 89.3 | 60  | 0    |
| 1964 | 10 | 5  | 0  | 10 | HILDA  | 30.6 | 87.8 | 50  | 0    |
| 1964 | 10 | 5  | 6  | 10 | HILDA  | 30.5 | 86.1 | 40  | 0    |
| 1964 | 10 | 5  | 12 | 10 | HILDA  | 30.8 | 84.5 | 35  | 0    |
| 1964 | 10 | 5  | 18 | 10 | HILDA  | 31.0 | 82.5 | 35  | 0    |
| 1964 | 10 | 8  | 12 | 11 | ISBELL | 13.0 | 80.0 | 25  | 1008 |
| 1964 | 10 | 8  | 18 | 11 | ISBELL | 13.4 | 80.6 | 25  | 0    |
| 1964 | 10 | 9  | 0  | 11 | ISBELL | 14.0 | 81.3 | 25  | 0    |
| 1964 | 10 | 9  | 6  | 11 | ISBELL | 14.8 | 82.2 | 25  | 0    |
| 1964 | 10 | 9  | 12 | 11 | ISBELL | 15.5 | 83.0 | 25  | 1008 |
| 1964 | 10 | 9  | 18 | 11 | ISBELL | 16.3 | 83.5 | 25  | 0    |
| 1964 | 10 | 10 | 0  | 11 | ISBELL | 17.0 | 84.0 | 25  | 0    |
| 1964 | 10 | 10 | 6  | 11 | ISBELL | 17.6 | 84.5 | 25  | 0    |
| 1964 | 10 | 10 | 12 | 11 | ISBELL | 18.0 | 85.0 | 25  | 0    |

|                           |      |      |     |      |
|---------------------------|------|------|-----|------|
| 1964 10 10 18 11 ISBELL   | 18.4 | 85.2 | 25  | 1008 |
| 1964 10 11 0 11 ISBELL    | 18.9 | 85.3 | 25  | 0    |
| 1964 10 11 6 11 ISBELL    | 19.2 | 85.5 | 25  | 0    |
| 1964 10 11 12 11 ISBELL   | 19.4 | 85.7 | 25  | 0    |
| 1964 10 11 18 11 ISBELL   | 19.4 | 86.0 | 25  | 0    |
| 1964 10 12 0 11 ISBELL    | 19.3 | 86.1 | 25  | 0    |
| 1964 10 12 6 11 ISBELL    | 19.2 | 85.9 | 30  | 0    |
| 1964 10 12 12 11 ISBELL   | 19.2 | 85.8 | 30  | 0    |
| 1964 10 12 18 11 ISBELL   | 19.4 | 85.7 | 30  | 1005 |
| 1964 10 13 0 11 ISBELL    | 20.0 | 85.0 | 40  | 0    |
| 1964 10 13 6 11 ISBELL    | 20.5 | 84.8 | 50  | 0    |
| 1964 10 13 12 11 ISBELL   | 21.0 | 84.6 | 60  | 0    |
| 1964 10 13 18 11 ISBELL   | 21.7 | 84.5 | 80  | 979  |
| 1964 10 14 0 11 ISBELL    | 22.5 | 84.1 | 95  | 0    |
| 1964 10 14 6 11 ISBELL    | 23.2 | 83.6 | 100 | 0    |
| 1964 10 14 12 11 ISBELL   | 24.0 | 82.9 | 110 | 964  |
| 1964 10 14 18 11 ISBELL   | 25.1 | 82.0 | 110 | 968  |
| 1964 10 15 0 11 ISBELL    | 26.4 | 80.6 | 110 | 0    |
| 1964 10 15 6 11 ISBELL    | 27.8 | 79.0 | 100 | 0    |
| 1964 10 15 12 11 ISBELL   | 29.6 | 77.3 | 80  | 980  |
| 1964 10 15 18 11 ISBELL   | 30.5 | 76.5 | 70  | 986  |
| 1964 10 16 0 11 ISBELL    | 31.9 | 76.1 | 65  | 990  |
| 1964 10 16 6 11 ISBELL    | 33.4 | 76.2 | 65  | 994  |
| 1964 10 16 12 11 ISBELL   | 34.9 | 76.4 | 40  | 1000 |
| 1964 10 16 18 11 ISBELL   | 36.0 | 76.5 | 35  | 0    |
| 1964 10 17 0 11 ISBELL    | 36.5 | 76.5 | 30  | 0    |
| 1964 11 5 0 12 NOT NAMED  | 11.3 | 80.1 | 25  | 0    |
| 1964 11 5 6 12 NOT NAMED  | 11.8 | 80.5 | 25  | 0    |
| 1964 11 5 12 12 NOT NAMED | 12.2 | 80.8 | 25  | 0    |
| 1964 11 5 18 12 NOT NAMED | 12.6 | 81.0 | 25  | 0    |
| 1964 11 6 0 12 NOT NAMED  | 13.0 | 81.1 | 25  | 0    |
| 1964 11 6 6 12 NOT NAMED  | 13.5 | 81.3 | 30  | 0    |
| 1964 11 6 12 12 NOT NAMED | 13.9 | 81.4 | 35  | 0    |
| 1964 11 6 18 12 NOT NAMED | 14.1 | 81.8 | 35  | 0    |
| 1964 11 7 0 12 NOT NAMED  | 14.2 | 82.4 | 35  | 0    |
| 1964 11 7 6 12 NOT NAMED  | 14.2 | 82.8 | 35  | 0    |
| 1964 11 7 12 12 NOT NAMED | 14.2 | 83.3 | 35  | 0    |
| 1964 11 7 18 12 NOT NAMED | 14.5 | 84.0 | 35  | 997  |
| 1964 11 8 0 12 NOT NAMED  | 15.0 | 84.7 | 35  | 0    |
| 1964 11 8 6 12 NOT NAMED  | 15.5 | 85.0 | 30  | 0    |
| 1964 11 8 12 12 NOT NAMED | 16.0 | 85.4 | 25  | 0    |
| 1964 11 8 18 12 NOT NAMED | 16.4 | 85.8 | 25  | 0    |
| 1964 11 9 0 12 NOT NAMED  | 16.8 | 86.1 | 25  | 0    |
| 1964 11 9 6 12 NOT NAMED  | 17.3 | 86.7 | 25  | 0    |

|      |    |    |    |    |           |      |      |    |   |
|------|----|----|----|----|-----------|------|------|----|---|
| 1964 | 11 | 9  | 12 | 12 | NOT NAMED | 17.8 | 87.6 | 25 | 0 |
| 1964 | 11 | 9  | 18 | 12 | NOT NAMED | 18.2 | 88.3 | 25 | 0 |
| 1964 | 11 | 10 | 0  | 12 | NOT NAMED | 18.5 | 88.9 | 25 | 0 |
| 1965 | 6  | 11 | 6  | 1  | NOT NAMED | 12.5 | 91.3 | 25 | 0 |
| 1965 | 6  | 11 | 12 | 1  | NOT NAMED | 13.6 | 91.3 | 25 | 0 |
| 1965 | 6  | 11 | 18 | 1  | NOT NAMED | 14.6 | 91.3 | 25 | 0 |
| 1965 | 6  | 12 | 0  | 1  | NOT NAMED | 15.7 | 91.3 | 25 | 0 |
| 1965 | 6  | 12 | 6  | 1  | NOT NAMED | 16.8 | 91.1 | 25 | 0 |
| 1965 | 6  | 12 | 12 | 1  | NOT NAMED | 17.9 | 91.0 | 25 | 0 |
| 1965 | 6  | 12 | 18 | 1  | NOT NAMED | 18.9 | 91.0 | 25 | 0 |
| 1965 | 6  | 13 | 0  | 1  | NOT NAMED | 19.9 | 91.0 | 25 | 0 |
| 1965 | 6  | 13 | 6  | 1  | NOT NAMED | 20.9 | 91.0 | 25 | 0 |
| 1965 | 6  | 13 | 12 | 1  | NOT NAMED | 22.0 | 91.0 | 25 | 0 |
| 1965 | 6  | 13 | 18 | 1  | NOT NAMED | 23.1 | 91.0 | 30 | 0 |
| 1965 | 6  | 14 | 0  | 1  | NOT NAMED | 24.1 | 91.1 | 35 | 0 |
| 1965 | 6  | 14 | 6  | 1  | NOT NAMED | 25.1 | 90.9 | 35 | 0 |
| 1965 | 6  | 14 | 12 | 1  | NOT NAMED | 26.1 | 90.5 | 35 | 0 |
| 1965 | 6  | 14 | 18 | 1  | NOT NAMED | 26.9 | 90.0 | 40 | 0 |
| 1965 | 6  | 15 | 0  | 1  | NOT NAMED | 27.8 | 89.1 | 45 | 0 |
| 1965 | 6  | 15 | 6  | 1  | NOT NAMED | 29.0 | 87.7 | 45 | 0 |
| 1965 | 6  | 15 | 12 | 1  | NOT NAMED | 30.4 | 86.0 | 45 | 0 |
| 1965 | 6  | 15 | 18 | 1  | NOT NAMED | 31.9 | 84.2 | 40 | 0 |
| 1965 | 6  | 16 | 0  | 1  | NOT NAMED | 33.5 | 82.1 | 35 | 0 |
| 1965 | 6  | 16 | 6  | 1  | NOT NAMED | 35.0 | 79.1 | 30 | 0 |
| 1965 | 6  | 16 | 12 | 1  | NOT NAMED | 36.2 | 76.2 | 25 | 0 |
| 1965 | 6  | 16 | 18 | 1  | NOT NAMED | 37.0 | 74.0 | 25 | 0 |
| 1965 | 6  | 17 | 0  | 1  | NOT NAMED | 37.7 | 71.7 | 25 | 0 |
| 1965 | 6  | 17 | 6  | 1  | NOT NAMED | 38.4 | 69.4 | 25 | 0 |
| 1965 | 6  | 17 | 12 | 1  | NOT NAMED | 39.0 | 67.0 | 25 | 0 |
| 1965 | 6  | 17 | 18 | 1  | NOT NAMED | 39.5 | 64.5 | 25 | 0 |
| 1965 | 6  | 18 | 0  | 1  | NOT NAMED | 40.0 | 61.8 | 25 | 0 |
| 1965 | 6  | 18 | 6  | 1  | NOT NAMED | 40.4 | 59.1 | 25 | 0 |
| 1965 | 8  | 21 | 6  | 2  | ANNA      | 32.4 | 51.8 | 35 | 0 |
| 1965 | 8  | 21 | 12 | 2  | ANNA      | 33.0 | 52.0 | 35 | 0 |
| 1965 | 8  | 21 | 18 | 2  | ANNA      | 33.7 | 52.1 | 35 | 0 |
| 1965 | 8  | 22 | 0  | 2  | ANNA      | 34.2 | 52.1 | 35 | 0 |
| 1965 | 8  | 22 | 6  | 2  | ANNA      | 34.6 | 52.1 | 35 | 0 |
| 1965 | 8  | 22 | 12 | 2  | ANNA      | 35.1 | 52.2 | 35 | 0 |
| 1965 | 8  | 22 | 18 | 2  | ANNA      | 35.6 | 52.2 | 35 | 0 |
| 1965 | 8  | 23 | 0  | 2  | ANNA      | 36.0 | 52.1 | 35 | 0 |
| 1965 | 8  | 23 | 6  | 2  | ANNA      | 36.4 | 52.0 | 40 | 0 |
| 1965 | 8  | 23 | 12 | 2  | ANNA      | 36.9 | 51.9 | 50 | 0 |
| 1965 | 8  | 23 | 18 | 2  | ANNA      | 37.5 | 51.6 | 65 | 0 |
| 1965 | 8  | 24 | 0  | 2  | ANNA      | 38.3 | 51.3 | 65 | 0 |

|      |      |    |         |      |      |     |      |
|------|------|----|---------|------|------|-----|------|
| 1965 | 8 24 | 6  | 2 ANNA  | 39.0 | 50.9 | 70  | 0    |
| 1965 | 8 24 | 12 | 2 ANNA  | 39.8 | 50.3 | 75  | 0    |
| 1965 | 8 24 | 18 | 2 ANNA  | 41.1 | 48.8 | 80  | 0    |
| 1965 | 8 25 | 0  | 2 ANNA  | 43.0 | 46.0 | 75  | 0    |
| 1965 | 8 25 | 6  | 2 ANNA  | 45.1 | 42.4 | 75  | 0    |
| 1965 | 8 25 | 12 | 2 ANNA  | 47.1 | 38.1 | 75  | 0    |
| 1965 | 8 25 | 18 | 2 ANNA  | 49.1 | 33.4 | 70  | 0    |
| 1965 | 8 26 | 0  | 2 ANNA  | 51.0 | 27.9 | 70  | 0    |
| 1965 | 8 26 | 6  | 2 ANNA  | 52.6 | 21.0 | 70  | 0    |
| 1965 | 8 26 | 12 | 2 ANNA  | 54.1 | 12.6 | 65  | 0    |
| 1965 | 8 27 | 0  | 3 BETSY | 10.9 | 50.5 | 25  | 0    |
| 1965 | 8 27 | 6  | 3 BETSY | 11.1 | 52.1 | 30  | 0    |
| 1965 | 8 27 | 12 | 3 BETSY | 11.4 | 53.5 | 30  | 0    |
| 1965 | 8 27 | 18 | 3 BETSY | 11.6 | 54.5 | 30  | 1007 |
| 1965 | 8 28 | 0  | 3 BETSY | 12.0 | 55.8 | 30  | 0    |
| 1965 | 8 28 | 6  | 3 BETSY | 13.0 | 57.8 | 30  | 0    |
| 1965 | 8 28 | 12 | 3 BETSY | 14.0 | 59.8 | 30  | 1010 |
| 1965 | 8 28 | 18 | 3 BETSY | 15.3 | 61.4 | 30  | 0    |
| 1965 | 8 29 | 0  | 3 BETSY | 16.2 | 62.1 | 30  | 1010 |
| 1965 | 8 29 | 6  | 3 BETSY | 17.4 | 62.6 | 30  | 0    |
| 1965 | 8 29 | 12 | 3 BETSY | 19.2 | 63.4 | 35  | 1007 |
| 1965 | 8 29 | 18 | 3 BETSY | 20.5 | 64.3 | 40  | 997  |
| 1965 | 8 30 | 0  | 3 BETSY | 21.2 | 64.7 | 65  | 0    |
| 1965 | 8 30 | 6  | 3 BETSY | 21.8 | 65.1 | 65  | 0    |
| 1965 | 8 30 | 12 | 3 BETSY | 22.4 | 65.5 | 65  | 0    |
| 1965 | 8 30 | 18 | 3 BETSY | 22.6 | 65.6 | 65  | 1002 |
| 1965 | 8 31 | 0  | 3 BETSY | 22.7 | 65.7 | 65  | 994  |
| 1965 | 8 31 | 6  | 3 BETSY | 22.7 | 65.8 | 65  | 990  |
| 1965 | 8 31 | 12 | 3 BETSY | 22.5 | 66.1 | 70  | 0    |
| 1965 | 8 31 | 18 | 3 BETSY | 22.5 | 66.0 | 70  | 984  |
| 1965 | 9 1  | 0  | 3 BETSY | 22.5 | 66.1 | 75  | 0    |
| 1965 | 9 1  | 6  | 3 BETSY | 22.3 | 66.6 | 75  | 980  |
| 1965 | 9 1  | 12 | 3 BETSY | 22.2 | 67.5 | 80  | 988  |
| 1965 | 9 1  | 18 | 3 BETSY | 22.3 | 68.0 | 70  | 987  |
| 1965 | 9 2  | 0  | 3 BETSY | 22.5 | 68.5 | 80  | 970  |
| 1965 | 9 2  | 6  | 3 BETSY | 22.6 | 69.3 | 90  | 0    |
| 1965 | 9 2  | 12 | 3 BETSY | 22.8 | 70.2 | 105 | 942  |
| 1965 | 9 2  | 18 | 3 BETSY | 23.4 | 70.9 | 105 | 945  |
| 1965 | 9 3  | 0  | 3 BETSY | 24.1 | 71.3 | 110 | 0    |
| 1965 | 9 3  | 6  | 3 BETSY | 24.7 | 72.1 | 110 | 0    |
| 1965 | 9 3  | 12 | 3 BETSY | 25.3 | 72.9 | 110 | 955  |
| 1965 | 9 3  | 18 | 3 BETSY | 26.3 | 73.7 | 115 | 950  |
| 1965 | 9 4  | 0  | 3 BETSY | 26.9 | 74.3 | 120 | 951  |
| 1965 | 9 4  | 6  | 3 BETSY | 27.3 | 74.7 | 120 | 946  |

|      |   |    |    |   |       |      |      |     |     |
|------|---|----|----|---|-------|------|------|-----|-----|
| 1965 | 9 | 4  | 12 | 3 | BETSY | 28.1 | 75.3 | 120 | 951 |
| 1965 | 9 | 4  | 18 | 3 | BETSY | 28.6 | 75.6 | 115 | 946 |
| 1965 | 9 | 5  | 0  | 3 | BETSY | 28.8 | 75.4 | 110 | 943 |
| 1965 | 9 | 5  | 6  | 3 | BETSY | 29.0 | 75.3 | 110 | 954 |
| 1965 | 9 | 5  | 12 | 3 | BETSY | 29.0 | 75.3 | 105 | 952 |
| 1965 | 9 | 5  | 18 | 3 | BETSY | 28.6 | 75.4 | 100 | 968 |
| 1965 | 9 | 6  | 0  | 3 | BETSY | 28.0 | 75.4 | 95  | 973 |
| 1965 | 9 | 6  | 6  | 3 | BETSY | 27.5 | 75.8 | 100 | 968 |
| 1965 | 9 | 6  | 12 | 3 | BETSY | 26.9 | 76.3 | 100 | 966 |
| 1965 | 9 | 6  | 18 | 3 | BETSY | 26.2 | 76.5 | 100 | 0   |
| 1965 | 9 | 7  | 0  | 3 | BETSY | 25.8 | 76.7 | 100 | 956 |
| 1965 | 9 | 7  | 6  | 3 | BETSY | 25.6 | 76.9 | 105 | 956 |
| 1965 | 9 | 7  | 12 | 3 | BETSY | 25.3 | 77.2 | 110 | 957 |
| 1965 | 9 | 7  | 18 | 3 | BETSY | 25.3 | 77.9 | 110 | 952 |
| 1965 | 9 | 8  | 0  | 3 | BETSY | 25.2 | 78.5 | 110 | 961 |
| 1965 | 9 | 8  | 6  | 3 | BETSY | 25.1 | 79.5 | 110 | 954 |
| 1965 | 9 | 8  | 12 | 3 | BETSY | 25.1 | 80.7 | 110 | 952 |
| 1965 | 9 | 8  | 18 | 3 | BETSY | 25.3 | 82.2 | 105 | 948 |
| 1965 | 9 | 9  | 0  | 3 | BETSY | 25.5 | 83.6 | 110 | 0   |
| 1965 | 9 | 9  | 6  | 3 | BETSY | 25.9 | 85.3 | 115 | 0   |
| 1965 | 9 | 9  | 12 | 3 | BETSY | 26.4 | 86.9 | 120 | 951 |
| 1965 | 9 | 9  | 18 | 3 | BETSY | 27.3 | 88.1 | 125 | 953 |
| 1965 | 9 | 10 | 0  | 3 | BETSY | 28.3 | 89.2 | 135 | 941 |
| 1965 | 9 | 10 | 6  | 3 | BETSY | 29.6 | 90.7 | 90  | 948 |
| 1965 | 9 | 10 | 12 | 3 | BETSY | 30.8 | 91.8 | 65  | 965 |
| 1965 | 9 | 10 | 18 | 3 | BETSY | 32.3 | 92.0 | 55  | 0   |
| 1965 | 9 | 11 | 0  | 3 | BETSY | 33.0 | 92.0 | 35  | 0   |
| 1965 | 9 | 11 | 6  | 3 | BETSY | 34.0 | 91.5 | 30  | 0   |
| 1965 | 9 | 11 | 12 | 3 | BETSY | 34.6 | 91.0 | 30  | 0   |
| 1965 | 9 | 11 | 18 | 3 | BETSY | 35.5 | 90.2 | 25  | 0   |
| 1965 | 9 | 12 | 0  | 3 | BETSY | 36.3 | 88.4 | 20  | 0   |
| 1965 | 9 | 12 | 6  | 3 | BETSY | 37.0 | 87.5 | 20  | 0   |
| 1965 | 9 | 12 | 12 | 3 | BETSY | 38.0 | 86.5 | 20  | 0   |
| 1965 | 9 | 12 | 18 | 3 | BETSY | 39.0 | 85.0 | 20  | 0   |
| 1965 | 9 | 13 | 0  | 3 | BETSY | 39.0 | 83.0 | 20  | 0   |
| 1965 | 9 | 16 | 6  | 4 | CAROL | 13.3 | 20.1 | 25  | 0   |
| 1965 | 9 | 16 | 12 | 4 | CAROL | 13.0 | 22.0 | 25  | 0   |
| 1965 | 9 | 16 | 18 | 4 | CAROL | 12.7 | 23.8 | 25  | 0   |
| 1965 | 9 | 17 | 0  | 4 | CAROL | 12.5 | 25.6 | 25  | 0   |
| 1965 | 9 | 17 | 6  | 4 | CAROL | 12.3 | 27.4 | 25  | 0   |
| 1965 | 9 | 17 | 12 | 4 | CAROL | 12.3 | 29.2 | 30  | 0   |
| 1965 | 9 | 17 | 18 | 4 | CAROL | 12.4 | 30.7 | 35  | 0   |
| 1965 | 9 | 18 | 0  | 4 | CAROL | 12.6 | 31.9 | 40  | 0   |
| 1965 | 9 | 18 | 6  | 4 | CAROL | 12.9 | 33.1 | 40  | 0   |

|      |         |         |      |      |    |     |
|------|---------|---------|------|------|----|-----|
| 1965 | 9 18 12 | 4 CAROL | 13.2 | 34.3 | 40 | 0   |
| 1965 | 9 18 18 | 4 CAROL | 13.5 | 35.6 | 40 | 0   |
| 1965 | 9 19 0  | 4 CAROL | 14.0 | 36.8 | 40 | 0   |
| 1965 | 9 19 6  | 4 CAROL | 14.8 | 37.9 | 40 | 0   |
| 1965 | 9 19 12 | 4 CAROL | 15.5 | 38.7 | 40 | 0   |
| 1965 | 9 19 18 | 4 CAROL | 16.3 | 39.2 | 40 | 0   |
| 1965 | 9 20 0  | 4 CAROL | 17.0 | 39.6 | 45 | 0   |
| 1965 | 9 20 6  | 4 CAROL | 17.9 | 40.0 | 50 | 0   |
| 1965 | 9 20 12 | 4 CAROL | 18.9 | 40.3 | 55 | 0   |
| 1965 | 9 20 18 | 4 CAROL | 19.7 | 40.6 | 65 | 0   |
| 1965 | 9 21 0  | 4 CAROL | 20.4 | 40.8 | 65 | 0   |
| 1965 | 9 21 6  | 4 CAROL | 21.5 | 40.9 | 65 | 974 |
| 1965 | 9 21 12 | 4 CAROL | 23.0 | 41.0 | 65 | 974 |
| 1965 | 9 21 18 | 4 CAROL | 24.9 | 41.1 | 70 | 0   |
| 1965 | 9 22 0  | 4 CAROL | 26.8 | 41.2 | 75 | 0   |
| 1965 | 9 22 6  | 4 CAROL | 28.8 | 41.4 | 75 | 0   |
| 1965 | 9 22 12 | 4 CAROL | 30.8 | 41.8 | 75 | 980 |
| 1965 | 9 22 18 | 4 CAROL | 32.4 | 42.2 | 75 | 0   |
| 1965 | 9 23 0  | 4 CAROL | 33.3 | 42.6 | 70 | 992 |
| 1965 | 9 23 6  | 4 CAROL | 33.9 | 42.9 | 65 | 0   |
| 1965 | 9 23 12 | 4 CAROL | 34.4 | 43.0 | 65 | 988 |
| 1965 | 9 23 18 | 4 CAROL | 34.8 | 43.0 | 65 | 0   |
| 1965 | 9 24 0  | 4 CAROL | 35.1 | 42.9 | 65 | 0   |
| 1965 | 9 24 6  | 4 CAROL | 35.2 | 42.6 | 65 | 0   |
| 1965 | 9 24 12 | 4 CAROL | 35.2 | 42.3 | 65 | 0   |
| 1965 | 9 24 18 | 4 CAROL | 35.1 | 42.0 | 65 | 991 |
| 1965 | 9 25 0  | 4 CAROL | 34.9 | 41.7 | 65 | 0   |
| 1965 | 9 25 6  | 4 CAROL | 34.4 | 41.4 | 65 | 0   |
| 1965 | 9 25 12 | 4 CAROL | 34.0 | 41.1 | 65 | 986 |
| 1965 | 9 25 18 | 4 CAROL | 33.8 | 41.0 | 65 | 986 |
| 1965 | 9 26 0  | 4 CAROL | 33.5 | 41.0 | 65 | 986 |
| 1965 | 9 26 6  | 4 CAROL | 33.3 | 41.0 | 65 | 0   |
| 1965 | 9 26 12 | 4 CAROL | 33.0 | 41.0 | 65 | 998 |
| 1965 | 9 26 18 | 4 CAROL | 32.7 | 41.2 | 65 | 0   |
| 1965 | 9 27 0  | 4 CAROL | 32.6 | 41.5 | 65 | 0   |
| 1965 | 9 27 6  | 4 CAROL | 32.8 | 41.8 | 65 | 0   |
| 1965 | 9 27 12 | 4 CAROL | 33.1 | 41.9 | 70 | 0   |
| 1965 | 9 27 18 | 4 CAROL | 33.4 | 41.9 | 70 | 0   |
| 1965 | 9 28 0  | 4 CAROL | 33.7 | 41.8 | 70 | 992 |
| 1965 | 9 28 6  | 4 CAROL | 34.0 | 41.8 | 70 | 0   |
| 1965 | 9 28 12 | 4 CAROL | 34.6 | 41.7 | 70 | 0   |
| 1965 | 9 28 18 | 4 CAROL | 35.6 | 40.9 | 70 | 988 |
| 1965 | 9 29 0  | 4 CAROL | 36.6 | 39.3 | 75 | 0   |
| 1965 | 9 29 6  | 4 CAROL | 37.6 | 37.6 | 80 | 0   |



|      |    |    |    |   |        |      |      |    |      |
|------|----|----|----|---|--------|------|------|----|------|
| 1965 | 9  | 29 | 12 | 4 | CAROL  | 38.7 | 35.4 | 85 | 0    |
| 1965 | 9  | 29 | 18 | 4 | CAROL  | 40.1 | 32.9 | 80 | 984  |
| 1965 | 9  | 30 | 0  | 4 | CAROL  | 41.5 | 30.2 | 75 | 0    |
| 1965 | 9  | 30 | 6  | 4 | CAROL  | 42.7 | 27.4 | 70 | 0    |
| 1965 | 9  | 30 | 12 | 4 | CAROL  | 42.8 | 24.7 | 70 | 0    |
| 1965 | 9  | 30 | 18 | 4 | CAROL  | 41.8 | 22.0 | 65 | 0    |
| 1965 | 10 | 1  | 0  | 4 | CAROL  | 40.7 | 19.7 | 65 | 0    |
| 1965 | 10 | 1  | 6  | 4 | CAROL  | 39.8 | 17.8 | 45 | 0    |
| 1965 | 10 | 1  | 12 | 4 | CAROL  | 38.8 | 16.0 | 25 | 0    |
| 1965 | 10 | 1  | 18 | 4 | CAROL  | 37.6 | 14.2 | 25 | 0    |
| 1965 | 9  | 24 | 12 | 5 | DEBBIE | 17.5 | 84.7 | 25 | 1003 |
| 1965 | 9  | 24 | 18 | 5 | DEBBIE | 18.1 | 85.0 | 25 | 0    |
| 1965 | 9  | 25 | 0  | 5 | DEBBIE | 18.6 | 85.4 | 25 | 0    |
| 1965 | 9  | 25 | 6  | 5 | DEBBIE | 19.1 | 85.7 | 25 | 0    |
| 1965 | 9  | 25 | 12 | 5 | DEBBIE | 19.6 | 86.1 | 25 | 1005 |
| 1965 | 9  | 25 | 18 | 5 | DEBBIE | 20.1 | 86.5 | 25 | 0    |
| 1965 | 9  | 26 | 0  | 5 | DEBBIE | 20.5 | 86.9 | 25 | 0    |
| 1965 | 9  | 26 | 6  | 5 | DEBBIE | 21.0 | 87.3 | 25 | 0    |
| 1965 | 9  | 26 | 12 | 5 | DEBBIE | 21.5 | 87.7 | 25 | 0    |
| 1965 | 9  | 26 | 18 | 5 | DEBBIE | 22.0 | 88.3 | 25 | 1007 |
| 1965 | 9  | 27 | 0  | 5 | DEBBIE | 22.5 | 88.9 | 25 | 1006 |
| 1965 | 9  | 27 | 6  | 5 | DEBBIE | 23.0 | 89.5 | 30 | 0    |
| 1965 | 9  | 27 | 12 | 5 | DEBBIE | 23.5 | 90.1 | 30 | 1007 |
| 1965 | 9  | 27 | 18 | 5 | DEBBIE | 24.1 | 90.3 | 30 | 1007 |
| 1965 | 9  | 28 | 0  | 5 | DEBBIE | 24.8 | 90.4 | 30 | 0    |
| 1965 | 9  | 28 | 6  | 5 | DEBBIE | 25.7 | 90.0 | 30 | 0    |
| 1965 | 9  | 28 | 12 | 5 | DEBBIE | 26.5 | 89.7 | 40 | 1001 |
| 1965 | 9  | 28 | 18 | 5 | DEBBIE | 27.4 | 89.2 | 45 | 1004 |
| 1965 | 9  | 29 | 0  | 5 | DEBBIE | 28.3 | 88.7 | 45 | 1004 |
| 1965 | 9  | 29 | 6  | 5 | DEBBIE | 28.6 | 88.6 | 35 | 0    |
| 1965 | 9  | 29 | 12 | 5 | DEBBIE | 29.0 | 88.5 | 35 | 0    |
| 1965 | 9  | 29 | 18 | 5 | DEBBIE | 29.5 | 88.7 | 30 | 0    |
| 1965 | 9  | 30 | 0  | 5 | DEBBIE | 30.0 | 88.9 | 30 | 0    |
| 1965 | 10 | 12 | 12 | 6 | ELENA  | 15.6 | 45.5 | 30 | 0    |
| 1965 | 10 | 12 | 18 | 6 | ELENA  | 18.0 | 47.0 | 30 | 0    |
| 1965 | 10 | 13 | 0  | 6 | ELENA  | 19.1 | 48.6 | 30 | 0    |
| 1965 | 10 | 13 | 6  | 6 | ELENA  | 19.8 | 50.4 | 30 | 0    |
| 1965 | 10 | 13 | 12 | 6 | ELENA  | 20.5 | 52.0 | 30 | 0    |
| 1965 | 10 | 13 | 18 | 6 | ELENA  | 21.2 | 53.1 | 30 | 0    |
| 1965 | 10 | 14 | 0  | 6 | ELENA  | 22.0 | 54.1 | 40 | 0    |
| 1965 | 10 | 14 | 6  | 6 | ELENA  | 23.1 | 55.1 | 40 | 0    |
| 1965 | 10 | 14 | 12 | 6 | ELENA  | 24.0 | 56.0 | 40 | 1005 |
| 1965 | 10 | 14 | 18 | 6 | ELENA  | 24.5 | 56.8 | 40 | 0    |
| 1965 | 10 | 15 | 0  | 6 | ELENA  | 24.9 | 57.4 | 40 | 0    |

|                       |      |      |     |      |
|-----------------------|------|------|-----|------|
| 1965 10 15 6 6 ELENA  | 25.4 | 58.0 | 40  | 1005 |
| 1965 10 15 12 6 ELENA | 25.9 | 58.5 | 45  | 1001 |
| 1965 10 15 18 6 ELENA | 26.3 | 58.9 | 50  | 995  |
| 1965 10 16 0 6 ELENA  | 26.7 | 59.2 | 55  | 995  |
| 1965 10 16 6 6 ELENA  | 27.3 | 59.7 | 65  | 991  |
| 1965 10 16 12 6 ELENA | 28.0 | 60.3 | 65  | 0    |
| 1965 10 16 18 6 ELENA | 28.8 | 60.2 | 65  | 992  |
| 1965 10 17 0 6 ELENA  | 30.0 | 59.4 | 65  | 998  |
| 1965 10 17 6 6 ELENA  | 31.5 | 58.3 | 65  | 992  |
| 1965 10 17 12 6 ELENA | 33.0 | 56.3 | 70  | 988  |
| 1965 10 17 18 6 ELENA | 34.4 | 53.4 | 70  | 986  |
| 1965 10 18 0 6 ELENA  | 35.8 | 50.0 | 70  | 0    |
| 1965 10 18 6 6 ELENA  | 37.3 | 46.4 | 70  | 0    |
| 1965 10 18 12 6 ELENA | 39.0 | 42.5 | 70  | 977  |
| 1965 10 18 18 6 ELENA | 41.0 | 37.9 | 70  | 0    |
| 1965 10 19 0 6 ELENA  | 43.5 | 32.5 | 70  | 0    |
| 1966 6 4 6 1 ALMA     | 12.7 | 84.0 | 25  | 0    |
| 1966 6 4 12 1 ALMA    | 13.3 | 84.3 | 25  | 0    |
| 1966 6 4 18 1 ALMA    | 14.0 | 84.5 | 25  | 0    |
| 1966 6 5 0 1 ALMA     | 14.8 | 84.7 | 25  | 0    |
| 1966 6 5 6 1 ALMA     | 15.5 | 84.8 | 25  | 0    |
| 1966 6 5 12 1 ALMA    | 16.3 | 84.8 | 30  | 1006 |
| 1966 6 5 18 1 ALMA    | 16.9 | 84.8 | 30  | 0    |
| 1966 6 6 0 1 ALMA     | 17.3 | 84.7 | 30  | 0    |
| 1966 6 6 6 1 ALMA     | 17.7 | 84.4 | 30  | 0    |
| 1966 6 6 12 1 ALMA    | 18.1 | 84.2 | 40  | 996  |
| 1966 6 6 18 1 ALMA    | 18.5 | 84.1 | 70  | 990  |
| 1966 6 7 0 1 ALMA     | 18.9 | 84.0 | 80  | 990  |
| 1966 6 7 6 1 ALMA     | 19.2 | 83.9 | 80  | 986  |
| 1966 6 7 12 1 ALMA    | 19.4 | 83.8 | 85  | 983  |
| 1966 6 7 18 1 ALMA    | 19.7 | 83.7 | 85  | 0    |
| 1966 6 8 0 1 ALMA     | 20.1 | 83.5 | 85  | 976  |
| 1966 6 8 6 1 ALMA     | 21.2 | 83.0 | 85  | 980  |
| 1966 6 8 12 1 ALMA    | 22.7 | 82.5 | 90  | 0    |
| 1966 6 8 18 1 ALMA    | 24.2 | 82.4 | 110 | 970  |
| 1966 6 9 0 1 ALMA     | 25.7 | 82.6 | 100 | 974  |
| 1966 6 9 6 1 ALMA     | 27.3 | 83.3 | 90  | 0    |
| 1966 6 9 12 1 ALMA    | 28.8 | 84.4 | 85  | 970  |
| 1966 6 9 18 1 ALMA    | 29.7 | 84.6 | 80  | 981  |
| 1966 6 10 0 1 ALMA    | 30.3 | 84.1 | 60  | 977  |
| 1966 6 10 6 1 ALMA    | 31.0 | 83.0 | 55  | 0    |
| 1966 6 10 12 1 ALMA   | 31.7 | 81.9 | 45  | 0    |
| 1966 6 10 18 1 ALMA   | 32.1 | 80.8 | 40  | 0    |
| 1966 6 11 0 1 ALMA    | 32.5 | 79.6 | 40  | 997  |

|      |   |    |    |   |       |      |      |    |      |
|------|---|----|----|---|-------|------|------|----|------|
| 1966 | 6 | 11 | 6  | 1 | ALMA  | 33.1 | 78.2 | 40 | 0    |
| 1966 | 6 | 11 | 12 | 1 | ALMA  | 33.7 | 76.7 | 40 | 990  |
| 1966 | 6 | 11 | 18 | 1 | ALMA  | 33.7 | 75.4 | 65 | 993  |
| 1966 | 6 | 12 | 0  | 1 | ALMA  | 33.7 | 74.2 | 70 | 998  |
| 1966 | 6 | 12 | 6  | 1 | ALMA  | 34.3 | 73.5 | 70 | 997  |
| 1966 | 6 | 12 | 12 | 1 | ALMA  | 34.9 | 73.3 | 60 | 994  |
| 1966 | 6 | 12 | 18 | 1 | ALMA  | 35.6 | 73.3 | 60 | 0    |
| 1966 | 6 | 13 | 0  | 1 | ALMA  | 36.3 | 73.3 | 55 | 999  |
| 1966 | 6 | 13 | 6  | 1 | ALMA  | 37.0 | 73.5 | 50 | 0    |
| 1966 | 6 | 13 | 12 | 1 | ALMA  | 37.6 | 73.5 | 45 | 1002 |
| 1966 | 6 | 13 | 18 | 1 | ALMA  | 38.2 | 72.9 | 45 | 0    |
| 1966 | 6 | 14 | 0  | 1 | ALMA  | 39.2 | 72.1 | 40 | 0    |
| 1966 | 6 | 14 | 6  | 1 | ALMA  | 40.6 | 71.3 | 40 | 0    |
| 1966 | 6 | 14 | 12 | 1 | ALMA  | 42.0 | 70.5 | 40 | 0    |
| 1966 | 7 | 1  | 18 | 2 | BECKY | 32.4 | 57.8 | 25 | 0    |
| 1966 | 7 | 2  | 0  | 2 | BECKY | 34.1 | 56.5 | 25 | 0    |
| 1966 | 7 | 2  | 6  | 2 | BECKY | 35.8 | 55.3 | 35 | 0    |
| 1966 | 7 | 2  | 12 | 2 | BECKY | 37.6 | 54.4 | 65 | 985  |
| 1966 | 7 | 2  | 18 | 2 | BECKY | 39.5 | 53.8 | 65 | 986  |
| 1966 | 7 | 3  | 0  | 2 | BECKY | 41.4 | 54.3 | 60 | 0    |
| 1966 | 7 | 3  | 6  | 2 | BECKY | 43.1 | 55.0 | 55 | 0    |
| 1966 | 7 | 3  | 12 | 2 | BECKY | 44.7 | 56.8 | 45 | 0    |
| 1966 | 7 | 3  | 18 | 2 | BECKY | 45.5 | 58.5 | 40 | 0    |
| 1966 | 7 | 13 | 12 | 3 | CELIA | 19.1 | 59.5 | 25 | 0    |
| 1966 | 7 | 13 | 18 | 3 | CELIA | 20.3 | 60.6 | 30 | 1012 |
| 1966 | 7 | 14 | 0  | 3 | CELIA | 21.3 | 61.8 | 40 | 0    |
| 1966 | 7 | 14 | 6  | 3 | CELIA | 22.1 | 63.0 | 40 | 0    |
| 1966 | 7 | 14 | 12 | 3 | CELIA | 22.6 | 64.2 | 40 | 1012 |
| 1966 | 7 | 14 | 18 | 3 | CELIA | 22.7 | 65.8 | 40 | 1012 |
| 1966 | 7 | 15 | 0  | 3 | CELIA | 22.7 | 67.4 | 35 | 0    |
| 1966 | 7 | 15 | 6  | 3 | CELIA | 22.9 | 68.6 | 35 | 0    |
| 1966 | 7 | 15 | 12 | 3 | CELIA | 23.0 | 69.4 | 30 | 1015 |
| 1966 | 7 | 15 | 18 | 3 | CELIA | 23.1 | 69.8 | 25 | 0    |
| 1966 | 7 | 16 | 0  | 3 | CELIA | 23.2 | 70.3 | 25 | 0    |
| 1966 | 7 | 16 | 6  | 3 | CELIA | 23.3 | 70.9 | 25 | 0    |
| 1966 | 7 | 16 | 12 | 3 | CELIA | 23.3 | 71.6 | 25 | 0    |
| 1966 | 7 | 16 | 18 | 3 | CELIA | 23.4 | 72.3 | 25 | 0    |
| 1966 | 7 | 17 | 0  | 3 | CELIA | 23.6 | 73.0 | 25 | 0    |
| 1966 | 7 | 17 | 6  | 3 | CELIA | 23.7 | 73.7 | 25 | 0    |
| 1966 | 7 | 17 | 12 | 3 | CELIA | 23.7 | 74.4 | 25 | 0    |
| 1966 | 7 | 17 | 18 | 3 | CELIA | 23.8 | 75.1 | 25 | 0    |
| 1966 | 7 | 18 | 0  | 3 | CELIA | 24.0 | 75.7 | 25 | 0    |
| 1966 | 7 | 18 | 6  | 3 | CELIA | 24.3 | 76.3 | 25 | 0    |
| 1966 | 7 | 18 | 12 | 3 | CELIA | 24.8 | 76.9 | 25 | 0    |

|      |         |           |      |      |    |     |
|------|---------|-----------|------|------|----|-----|
| 1966 | 7 18 18 | 3 CELIA   | 25.5 | 77.2 | 25 | 0   |
| 1966 | 7 19 0  | 3 CELIA   | 26.2 | 77.3 | 25 | 0   |
| 1966 | 7 19 6  | 3 CELIA   | 26.6 | 77.2 | 25 | 0   |
| 1966 | 7 19 12 | 3 CELIA   | 27.0 | 76.4 | 25 | 0   |
| 1966 | 7 19 18 | 3 CELIA   | 27.8 | 74.8 | 30 | 0   |
| 1966 | 7 20 0  | 3 CELIA   | 28.9 | 73.2 | 30 | 0   |
| 1966 | 7 20 6  | 3 CELIA   | 30.3 | 71.6 | 50 | 0   |
| 1966 | 7 20 12 | 3 CELIA   | 31.9 | 69.9 | 60 | 997 |
| 1966 | 7 20 18 | 3 CELIA   | 33.6 | 67.9 | 70 | 0   |
| 1966 | 7 21 0  | 3 CELIA   | 36.1 | 65.7 | 70 | 995 |
| 1966 | 7 21 6  | 3 CELIA   | 39.5 | 63.2 | 70 | 998 |
| 1966 | 7 21 12 | 3 CELIA   | 42.9 | 62.0 | 65 | 998 |
| 1966 | 7 21 18 | 3 CELIA   | 46.3 | 59.9 | 65 | 0   |
| 1966 | 7 22 0  | 3 CELIA   | 49.8 | 57.7 | 25 | 0   |
| 1966 | 7 22 6  | 3 CELIA   | 52.0 | 57.0 | 25 | 0   |
| 1966 | 7 22 18 | 4 DOROTHY | 31.0 | 41.0 | 25 | 0   |
| 1966 | 7 23 0  | 4 DOROTHY | 31.5 | 41.5 | 25 | 0   |
| 1966 | 7 23 6  | 4 DOROTHY | 31.7 | 41.7 | 25 | 0   |
| 1966 | 7 23 12 | 4 DOROTHY | 31.8 | 41.9 | 40 | 0   |
| 1966 | 7 23 18 | 4 DOROTHY | 32.0 | 42.0 | 40 | 0   |
| 1966 | 7 24 0  | 4 DOROTHY | 32.2 | 42.0 | 55 | 0   |
| 1966 | 7 24 6  | 4 DOROTHY | 32.4 | 42.1 | 60 | 0   |
| 1966 | 7 24 12 | 4 DOROTHY | 32.7 | 42.2 | 60 | 998 |
| 1966 | 7 24 18 | 4 DOROTHY | 33.0 | 42.1 | 65 | 0   |
| 1966 | 7 25 0  | 4 DOROTHY | 33.3 | 41.8 | 65 | 0   |
| 1966 | 7 25 6  | 4 DOROTHY | 33.8 | 41.1 | 65 | 0   |
| 1966 | 7 25 12 | 4 DOROTHY | 34.5 | 40.5 | 65 | 0   |
| 1966 | 7 25 18 | 4 DOROTHY | 35.3 | 40.5 | 65 | 997 |
| 1966 | 7 26 0  | 4 DOROTHY | 35.9 | 40.8 | 65 | 0   |
| 1966 | 7 26 6  | 4 DOROTHY | 36.1 | 41.4 | 65 | 0   |
| 1966 | 7 26 12 | 4 DOROTHY | 36.2 | 41.9 | 65 | 989 |
| 1966 | 7 26 18 | 4 DOROTHY | 36.4 | 42.2 | 65 | 0   |
| 1966 | 7 27 0  | 4 DOROTHY | 36.6 | 42.2 | 65 | 0   |
| 1966 | 7 27 6  | 4 DOROTHY | 37.4 | 41.9 | 65 | 0   |
| 1966 | 7 27 12 | 4 DOROTHY | 38.3 | 41.4 | 65 | 990 |
| 1966 | 7 27 18 | 4 DOROTHY | 38.7 | 40.8 | 70 | 0   |
| 1966 | 7 28 0  | 4 DOROTHY | 39.2 | 40.1 | 75 | 0   |
| 1966 | 7 28 6  | 4 DOROTHY | 40.1 | 39.2 | 70 | 0   |
| 1966 | 7 28 12 | 4 DOROTHY | 40.9 | 38.5 | 70 | 993 |
| 1966 | 7 28 18 | 4 DOROTHY | 41.6 | 38.2 | 70 | 996 |
| 1966 | 7 29 0  | 4 DOROTHY | 42.4 | 38.0 | 65 | 0   |
| 1966 | 7 29 6  | 4 DOROTHY | 43.1 | 37.7 | 60 | 0   |
| 1966 | 7 29 12 | 4 DOROTHY | 43.9 | 37.4 | 55 | 996 |
| 1966 | 7 29 18 | 4 DOROTHY | 44.6 | 37.4 | 50 | 999 |

|      |      |    |           |      |      |    |      |
|------|------|----|-----------|------|------|----|------|
| 1966 | 7 30 | 0  | 4 DOROTHY | 45.3 | 37.4 | 50 | 0    |
| 1966 | 7 30 | 6  | 4 DOROTHY | 46.0 | 37.3 | 45 | 0    |
| 1966 | 7 30 | 12 | 4 DOROTHY | 46.8 | 37.1 | 45 | 0    |
| 1966 | 7 30 | 18 | 4 DOROTHY | 47.7 | 36.4 | 45 | 0    |
| 1966 | 7 31 | 0  | 4 DOROTHY | 49.0 | 36.0 | 40 | 0    |
| 1966 | 7 31 | 6  | 4 DOROTHY | 50.5 | 36.5 | 40 | 0    |
| 1966 | 7 31 | 12 | 4 DOROTHY | 52.0 | 37.0 | 35 | 0    |
| 1966 | 7 31 | 18 | 4 DOROTHY | 53.5 | 38.5 | 35 | 0    |
| 1966 | 7 22 | 12 | 5 ELLA    | 10.0 | 35.0 | 25 | 0    |
| 1966 | 7 22 | 18 | 5 ELLA    | 10.8 | 36.8 | 25 | 0    |
| 1966 | 7 23 | 0  | 5 ELLA    | 11.7 | 38.7 | 25 | 0    |
| 1966 | 7 23 | 6  | 5 ELLA    | 12.5 | 40.7 | 25 | 0    |
| 1966 | 7 23 | 12 | 5 ELLA    | 13.4 | 42.7 | 30 | 0    |
| 1966 | 7 23 | 18 | 5 ELLA    | 14.2 | 44.6 | 30 | 0    |
| 1966 | 7 24 | 0  | 5 ELLA    | 15.0 | 46.5 | 30 | 0    |
| 1966 | 7 24 | 6  | 5 ELLA    | 15.7 | 48.6 | 30 | 0    |
| 1966 | 7 24 | 12 | 5 ELLA    | 16.3 | 50.6 | 30 | 0    |
| 1966 | 7 24 | 18 | 5 ELLA    | 16.8 | 52.2 | 35 | 1009 |
| 1966 | 7 25 | 0  | 5 ELLA    | 17.2 | 53.5 | 40 | 0    |
| 1966 | 7 25 | 6  | 5 ELLA    | 17.5 | 54.6 | 45 | 0    |
| 1966 | 7 25 | 12 | 5 ELLA    | 17.8 | 55.8 | 45 | 0    |
| 1966 | 7 25 | 18 | 5 ELLA    | 18.1 | 57.0 | 45 | 1010 |
| 1966 | 7 26 | 0  | 5 ELLA    | 18.4 | 58.2 | 45 | 0    |
| 1966 | 7 26 | 6  | 5 ELLA    | 18.8 | 59.3 | 45 | 0    |
| 1966 | 7 26 | 12 | 5 ELLA    | 19.3 | 60.3 | 45 | 1008 |
| 1966 | 7 26 | 18 | 5 ELLA    | 19.8 | 61.1 | 45 | 1008 |
| 1966 | 7 27 | 0  | 5 ELLA    | 20.2 | 61.9 | 45 | 0    |
| 1966 | 7 27 | 6  | 5 ELLA    | 20.8 | 62.6 | 45 | 0    |
| 1966 | 7 27 | 12 | 5 ELLA    | 21.4 | 63.4 | 45 | 1012 |
| 1966 | 7 27 | 18 | 5 ELLA    | 21.9 | 64.2 | 45 | 0    |
| 1966 | 7 28 | 0  | 5 ELLA    | 22.5 | 65.1 | 45 | 0    |
| 1966 | 7 28 | 6  | 5 ELLA    | 23.1 | 66.2 | 45 | 0    |
| 1966 | 7 28 | 12 | 5 ELLA    | 23.7 | 67.3 | 40 | 0    |
| 1966 | 7 28 | 18 | 5 ELLA    | 24.3 | 68.4 | 30 | 0    |
| 1966 | 8 21 | 0  | 6 FAITH   | 12.9 | 20.5 | 25 | 0    |
| 1966 | 8 21 | 6  | 6 FAITH   | 13.3 | 22.3 | 25 | 0    |
| 1966 | 8 21 | 12 | 6 FAITH   | 13.7 | 24.2 | 25 | 0    |
| 1966 | 8 21 | 18 | 6 FAITH   | 14.0 | 26.1 | 25 | 1006 |
| 1966 | 8 22 | 0  | 6 FAITH   | 14.3 | 28.0 | 35 | 0    |
| 1966 | 8 22 | 6  | 6 FAITH   | 14.6 | 29.9 | 35 | 0    |
| 1966 | 8 22 | 12 | 6 FAITH   | 14.9 | 31.9 | 35 | 0    |
| 1966 | 8 22 | 18 | 6 FAITH   | 15.0 | 33.9 | 40 | 0    |
| 1966 | 8 23 | 0  | 6 FAITH   | 15.1 | 35.8 | 50 | 0    |
| 1966 | 8 23 | 6  | 6 FAITH   | 15.2 | 37.8 | 50 | 0    |

|      |         |         |      |      |     |     |
|------|---------|---------|------|------|-----|-----|
| 1966 | 8 23 12 | 6 FAITH | 15.2 | 39.8 | 65  | 0   |
| 1966 | 8 23 18 | 6 FAITH | 15.3 | 41.8 | 65  | 0   |
| 1966 | 8 24 0  | 6 FAITH | 15.3 | 43.8 | 80  | 0   |
| 1966 | 8 24 6  | 6 FAITH | 15.3 | 45.7 | 80  | 0   |
| 1966 | 8 24 12 | 6 FAITH | 15.3 | 47.7 | 80  | 992 |
| 1966 | 8 24 18 | 6 FAITH | 15.6 | 49.8 | 85  | 0   |
| 1966 | 8 25 0  | 6 FAITH | 16.0 | 52.0 | 85  | 993 |
| 1966 | 8 25 6  | 6 FAITH | 16.3 | 54.1 | 90  | 995 |
| 1966 | 8 25 12 | 6 FAITH | 16.6 | 56.2 | 90  | 986 |
| 1966 | 8 25 18 | 6 FAITH | 16.9 | 57.9 | 90  | 990 |
| 1966 | 8 26 0  | 6 FAITH | 17.3 | 59.4 | 90  | 0   |
| 1966 | 8 26 6  | 6 FAITH | 17.7 | 60.8 | 85  | 997 |
| 1966 | 8 26 12 | 6 FAITH | 18.3 | 62.2 | 80  | 995 |
| 1966 | 8 26 18 | 6 FAITH | 19.0 | 63.7 | 75  | 0   |
| 1966 | 8 27 0  | 6 FAITH | 19.7 | 65.1 | 75  | 987 |
| 1966 | 8 27 6  | 6 FAITH | 20.4 | 66.3 | 75  | 993 |
| 1966 | 8 27 12 | 6 FAITH | 21.0 | 67.5 | 75  | 989 |
| 1966 | 8 27 18 | 6 FAITH | 21.6 | 68.7 | 75  | 983 |
| 1966 | 8 28 0  | 6 FAITH | 22.1 | 69.8 | 80  | 979 |
| 1966 | 8 28 6  | 6 FAITH | 22.7 | 70.5 | 90  | 973 |
| 1966 | 8 28 12 | 6 FAITH | 23.3 | 70.7 | 110 | 962 |
| 1966 | 8 28 18 | 6 FAITH | 23.7 | 70.9 | 110 | 957 |
| 1966 | 8 29 0  | 6 FAITH | 24.0 | 71.0 | 105 | 956 |
| 1966 | 8 29 6  | 6 FAITH | 24.4 | 71.1 | 100 | 960 |
| 1966 | 8 29 12 | 6 FAITH | 24.9 | 71.3 | 100 | 963 |
| 1966 | 8 29 18 | 6 FAITH | 25.3 | 71.5 | 100 | 963 |
| 1966 | 8 30 0  | 6 FAITH | 25.8 | 71.8 | 95  | 963 |
| 1966 | 8 30 6  | 6 FAITH | 26.3 | 72.1 | 95  | 970 |
| 1966 | 8 30 12 | 6 FAITH | 26.9 | 72.4 | 95  | 966 |
| 1966 | 8 30 18 | 6 FAITH | 27.4 | 72.7 | 90  | 0   |
| 1966 | 8 31 0  | 6 FAITH | 28.0 | 73.0 | 90  | 967 |
| 1966 | 8 31 6  | 6 FAITH | 28.5 | 73.3 | 90  | 0   |
| 1966 | 8 31 12 | 6 FAITH | 29.3 | 73.6 | 90  | 988 |
| 1966 | 8 31 18 | 6 FAITH | 30.5 | 73.3 | 90  | 963 |
| 1966 | 9 1 0   | 6 FAITH | 31.7 | 72.4 | 90  | 0   |
| 1966 | 9 1 6   | 6 FAITH | 32.9 | 71.4 | 95  | 963 |
| 1966 | 9 1 12  | 6 FAITH | 34.0 | 70.3 | 95  | 963 |
| 1966 | 9 1 18  | 6 FAITH | 35.0 | 69.2 | 95  | 957 |
| 1966 | 9 2 0   | 6 FAITH | 35.9 | 68.0 | 95  | 958 |
| 1966 | 9 2 6   | 6 FAITH | 36.6 | 66.8 | 95  | 0   |
| 1966 | 9 2 12  | 6 FAITH | 37.0 | 65.2 | 95  | 0   |
| 1966 | 9 2 18  | 6 FAITH | 37.1 | 63.0 | 90  | 0   |
| 1966 | 9 3 0   | 6 FAITH | 37.1 | 60.1 | 90  | 0   |
| 1966 | 9 3 6   | 6 FAITH | 37.5 | 57.0 | 90  | 950 |

|      |   |    |    |          |      |       |    |      |
|------|---|----|----|----------|------|-------|----|------|
| 1966 | 9 | 3  | 12 | 6 FAITH  | 38.3 | 54.0  | 90 | 0    |
| 1966 | 9 | 3  | 18 | 6 FAITH  | 39.7 | 51.1  | 90 | 0    |
| 1966 | 9 | 4  | 0  | 6 FAITH  | 41.9 | 48.1  | 90 | 0    |
| 1966 | 9 | 4  | 6  | 6 FAITH  | 44.7 | 44.9  | 90 | 0    |
| 1966 | 9 | 4  | 12 | 6 FAITH  | 47.5 | 41.5  | 90 | 954  |
| 1966 | 9 | 4  | 18 | 6 FAITH  | 50.2 | 37.8  | 90 | 0    |
| 1966 | 9 | 5  | 0  | 6 FAITH  | 52.8 | 33.8  | 90 | 0    |
| 1966 | 9 | 5  | 6  | 6 FAITH  | 55.2 | 29.4  | 90 | 0    |
| 1966 | 9 | 5  | 12 | 6 FAITH  | 57.3 | 24.5  | 90 | 0    |
| 1966 | 9 | 5  | 18 | 6 FAITH  | 58.7 | 19.4  | 90 | 0    |
| 1966 | 9 | 6  | 0  | 6 FAITH  | 60.4 | 12.0  | 90 | 0    |
| 1966 | 9 | 6  | 6  | 6 FAITH  | 61.1 | 6.0   | 65 | 0    |
| 1966 | 9 | 6  | 12 | 6 FAITH  | 62.5 | 3.0   | 55 | 0    |
| 1966 | 9 | 6  | 18 | 6 FAITH  | 62.6 | 357.5 | 55 | 0    |
| 1966 | 9 | 7  | 0  | 6 FAITH  | 62.9 | 353.0 | 40 | 0    |
| 1966 | 9 | 1  | 12 | 7 GRETA  | 13.7 | 48.4  | 25 | 0    |
| 1966 | 9 | 1  | 18 | 7 GRETA  | 14.3 | 49.6  | 25 | 0    |
| 1966 | 9 | 2  | 0  | 7 GRETA  | 14.9 | 50.8  | 25 | 1011 |
| 1966 | 9 | 2  | 6  | 7 GRETA  | 15.3 | 51.5  | 30 | 0    |
| 1966 | 9 | 2  | 12 | 7 GRETA  | 15.9 | 52.2  | 30 | 0    |
| 1966 | 9 | 2  | 18 | 7 GRETA  | 16.2 | 52.9  | 30 | 0    |
| 1966 | 9 | 3  | 0  | 7 GRETA  | 16.4 | 53.7  | 30 | 1010 |
| 1966 | 9 | 3  | 6  | 7 GRETA  | 16.7 | 54.3  | 30 | 0    |
| 1966 | 9 | 3  | 12 | 7 GRETA  | 17.0 | 55.0  | 30 | 1013 |
| 1966 | 9 | 3  | 18 | 7 GRETA  | 17.4 | 55.8  | 30 | 0    |
| 1966 | 9 | 4  | 0  | 7 GRETA  | 17.8 | 56.7  | 30 | 0    |
| 1966 | 9 | 4  | 6  | 7 GRETA  | 18.4 | 57.3  | 30 | 0    |
| 1966 | 9 | 4  | 12 | 7 GRETA  | 19.0 | 58.0  | 30 | 1009 |
| 1966 | 9 | 4  | 18 | 7 GRETA  | 19.8 | 59.0  | 50 | 0    |
| 1966 | 9 | 5  | 0  | 7 GRETA  | 20.7 | 60.1  | 50 | 1004 |
| 1966 | 9 | 5  | 6  | 7 GRETA  | 21.0 | 60.9  | 45 | 0    |
| 1966 | 9 | 5  | 12 | 7 GRETA  | 21.3 | 61.7  | 40 | 0    |
| 1966 | 9 | 5  | 18 | 7 GRETA  | 21.8 | 62.6  | 35 | 1007 |
| 1966 | 9 | 6  | 0  | 7 GRETA  | 22.2 | 63.7  | 35 | 1009 |
| 1966 | 9 | 6  | 6  | 7 GRETA  | 23.0 | 65.1  | 35 | 1009 |
| 1966 | 9 | 6  | 12 | 7 GRETA  | 23.7 | 66.7  | 30 | 1011 |
| 1966 | 9 | 6  | 18 | 7 GRETA  | 24.6 | 68.2  | 30 | 1011 |
| 1966 | 9 | 7  | 0  | 7 GRETA  | 25.6 | 69.7  | 30 | 0    |
| 1966 | 9 | 7  | 6  | 7 GRETA  | 26.1 | 70.6  | 30 | 0    |
| 1966 | 9 | 7  | 12 | 7 GRETA  | 26.7 | 71.5  | 30 | 1013 |
| 1966 | 9 | 7  | 18 | 7 GRETA  | 28.0 | 71.7  | 25 | 0    |
| 1966 | 9 | 20 | 12 | 8 HALLIE | 21.5 | 95.4  | 30 | 0    |
| 1966 | 9 | 20 | 18 | 8 HALLIE | 21.6 | 95.4  | 30 | 0    |
| 1966 | 9 | 21 | 0  | 8 HALLIE | 21.5 | 95.4  | 45 | 997  |

|      |      |    |          |      |      |     |      |
|------|------|----|----------|------|------|-----|------|
| 1966 | 9 21 | 6  | 8 HALLIE | 21.2 | 95.5 | 45  | 0    |
| 1966 | 9 21 | 12 | 8 HALLIE | 20.8 | 95.8 | 45  | 0    |
| 1966 | 9 21 | 18 | 8 HALLIE | 20.4 | 96.2 | 35  | 0    |
| 1966 | 9 22 | 0  | 8 HALLIE | 20.0 | 96.7 | 15  | 1012 |
| 1966 | 9 21 | 12 | 9 INEZ   | 9.9  | 35.1 | 25  | 0    |
| 1966 | 9 21 | 18 | 9 INEZ   | 10.4 | 36.0 | 25  | 0    |
| 1966 | 9 22 | 0  | 9 INEZ   | 10.9 | 37.1 | 25  | 0    |
| 1966 | 9 22 | 6  | 9 INEZ   | 11.3 | 38.3 | 25  | 0    |
| 1966 | 9 22 | 12 | 9 INEZ   | 11.7 | 39.4 | 25  | 0    |
| 1966 | 9 22 | 18 | 9 INEZ   | 12.0 | 40.6 | 25  | 0    |
| 1966 | 9 23 | 0  | 9 INEZ   | 12.3 | 41.7 | 25  | 0    |
| 1966 | 9 23 | 6  | 9 INEZ   | 12.7 | 43.1 | 25  | 0    |
| 1966 | 9 23 | 12 | 9 INEZ   | 13.1 | 44.3 | 30  | 0    |
| 1966 | 9 23 | 18 | 9 INEZ   | 13.4 | 45.1 | 30  | 0    |
| 1966 | 9 24 | 0  | 9 INEZ   | 13.7 | 46.0 | 30  | 0    |
| 1966 | 9 24 | 6  | 9 INEZ   | 14.0 | 46.9 | 30  | 0    |
| 1966 | 9 24 | 12 | 9 INEZ   | 14.4 | 47.7 | 30  | 1009 |
| 1966 | 9 24 | 18 | 9 INEZ   | 14.8 | 48.7 | 40  | 1008 |
| 1966 | 9 25 | 0  | 9 INEZ   | 15.1 | 49.7 | 45  | 0    |
| 1966 | 9 25 | 6  | 9 INEZ   | 15.4 | 50.6 | 50  | 0    |
| 1966 | 9 25 | 12 | 9 INEZ   | 15.6 | 51.5 | 55  | 1000 |
| 1966 | 9 25 | 18 | 9 INEZ   | 15.6 | 52.5 | 60  | 1000 |
| 1966 | 9 26 | 0  | 9 INEZ   | 15.6 | 53.6 | 60  | 0    |
| 1966 | 9 26 | 6  | 9 INEZ   | 15.7 | 54.8 | 60  | 0    |
| 1966 | 9 26 | 12 | 9 INEZ   | 15.8 | 56.0 | 70  | 995  |
| 1966 | 9 26 | 18 | 9 INEZ   | 15.8 | 57.0 | 75  | 982  |
| 1966 | 9 27 | 0  | 9 INEZ   | 15.9 | 58.0 | 80  | 0    |
| 1966 | 9 27 | 6  | 9 INEZ   | 16.0 | 59.2 | 95  | 965  |
| 1966 | 9 27 | 12 | 9 INEZ   | 16.1 | 60.4 | 105 | 961  |
| 1966 | 9 27 | 18 | 9 INEZ   | 16.2 | 61.7 | 110 | 962  |
| 1966 | 9 28 | 0  | 9 INEZ   | 16.3 | 63.0 | 110 | 0    |
| 1966 | 9 28 | 6  | 9 INEZ   | 16.5 | 64.3 | 115 | 955  |
| 1966 | 9 28 | 12 | 9 INEZ   | 16.8 | 65.7 | 120 | 0    |
| 1966 | 9 28 | 18 | 9 INEZ   | 17.0 | 67.1 | 130 | 932  |
| 1966 | 9 29 | 0  | 9 INEZ   | 17.1 | 68.5 | 130 | 929  |
| 1966 | 9 29 | 6  | 9 INEZ   | 17.3 | 69.7 | 125 | 0    |
| 1966 | 9 29 | 12 | 9 INEZ   | 17.5 | 70.9 | 120 | 0    |
| 1966 | 9 29 | 18 | 9 INEZ   | 18.1 | 72.3 | 100 | 0    |
| 1966 | 9 30 | 0  | 9 INEZ   | 18.8 | 73.6 | 80  | 987  |
| 1966 | 9 30 | 6  | 9 INEZ   | 19.3 | 74.5 | 90  | 0    |
| 1966 | 9 30 | 12 | 9 INEZ   | 19.8 | 75.4 | 100 | 0    |
| 1966 | 9 30 | 18 | 9 INEZ   | 20.2 | 76.3 | 65  | 0    |
| 1966 | 10 1 | 0  | 9 INEZ   | 20.5 | 77.1 | 65  | 0    |
| 1966 | 10 1 | 6  | 9 INEZ   | 20.8 | 78.1 | 65  | 0    |



|               |         |             |       |      |     |     |
|---------------|---------|-------------|-------|------|-----|-----|
| 1966 10       | 1 12    | 9 INEZ      | 21.2  | 79.1 | 65  | 0   |
| 1966 10       | 1 18    | 9 INEZ      | 21.9  | 79.8 | 65  | 0   |
| 1966 10       | 2 0     | 9 INEZ      | 22.6  | 80.1 | 65  | 0   |
| 1966 10       | 2 6     | 9 INEZ      | 23.0  | 80.1 | 65  | 0   |
| 1966 10       | 2 12    | 9 INEZ      | 23.3  | 79.9 | 55  | 0   |
| 1966 10       | 2 18    | 9 INEZ      | 24.0  | 79.5 | 55  | 999 |
| 1966 10       | 3 0     | 9 INEZ      | 24.6  | 79.1 | 65  | 995 |
| 1966 10       | 3 6     | 9 INEZ      | 24.9  | 78.8 | 65  | 989 |
| 1966 10       | 3 12    | 9 INEZ      | 25.2  | 78.5 | 65  | 985 |
| 1966 10       | 3 18    | 9 INEZ      | 25.4  | 78.3 | 70  | 986 |
| 1966 10       | 4 0     | 9 INEZ      | 25.6  | 78.4 | 75  | 985 |
| 1966 10       | 4 6     | 9 INEZ      | 25.5  | 79.0 | 75  | 0   |
| 1966 10       | 4 12    | 9 INEZ      | 25.3  | 79.7 | 75  | 987 |
| 1966 10       | 4 18    | 9 INEZ      | 25.0  | 80.5 | 75  | 984 |
| 1966 10       | 5 0     | 9 INEZ      | 24.7  | 81.3 | 75  | 988 |
| 1966 10       | 5 6     | 9 INEZ      | 24.6  | 82.2 | 80  | 985 |
| 1966 10       | 5 12    | 9 INEZ      | 24.5  | 83.0 | 80  | 0   |
| 1966 10       | 5 18    | 9 INEZ      | 24.3  | 83.6 | 85  | 980 |
| 1966 10       | 6 0     | 9 INEZ      | 24.0  | 84.3 | 90  | 970 |
| 1966 10       | 6 6     | 9 INEZ      | 23.7  | 85.0 | 95  | 983 |
| 1966 10       | 6 12    | 9 INEZ      | 23.3  | 85.6 | 95  | 974 |
| 1966 10       | 6 18    | 9 INEZ      | 22.8  | 86.3 | 100 | 974 |
| 1966 10       | 7 0     | 9 INEZ      | 22.3  | 87.2 | 105 | 961 |
| 1966 10       | 7 6     | 9 INEZ      | 22.1  | 88.1 | 110 | 0   |
| 1966 10       | 7 12    | 9 INEZ      | 21.9  | 89.0 | 110 | 0   |
| 1966 10       | 7 18    | 9 INEZ      | 21.7  | 90.0 | 115 | 972 |
| 1966 10       | 8 0     | 9 INEZ      | 21.5  | 91.0 | 115 | 972 |
| 1966 10       | 8 6     | 9 INEZ      | 21.5  | 92.1 | 115 | 0   |
| 1966 10       | 8 12    | 9 INEZ      | 21.8  | 93.1 | 120 | 953 |
| 1966 10       | 8 18    | 9 INEZ      | 22.1  | 93.9 | 120 | 956 |
| 1966 10       | 9 0     | 9 INEZ      | 22.3  | 94.6 | 120 | 948 |
| 1966 10       | 9 6     | 9 INEZ      | 22.6  | 95.2 | 120 | 951 |
| 1966 10       | 9 12    | 9 INEZ      | 22.8  | 95.7 | 120 | 0   |
| 1966 10       | 9 18    | 9 INEZ      | 23.0  | 96.0 | 120 | 953 |
| 1966 10 10    | 0       | 9 INEZ      | 23.0  | 96.4 | 115 | 960 |
| 1966 10 10    | 6       | 9 INEZ      | 23.0  | 97.1 | 110 | 962 |
| 1966 10 10 12 | 9 INEZ  | 22.8        | 97.8  | 105  | 961 |     |
| 1966 10 10 18 | 9 INEZ  | 22.4        | 98.5  | 60   | 0   |     |
| 1966 10 11    | 0       | 9 INEZ      | 22.1  | 99.2 | 30  | 0   |
| 1966 10 11    | 6       | 9 INEZ      | 21.8  | 99.9 | 30  | 0   |
| 1966 10 11 12 | 9 INEZ  | 21.5        | 100.6 | 30   | 0   |     |
| 1966          | 9 27    | 0 10 JUDITH | 10.8  | 43.2 | 25  | 0   |
| 1966          | 9 27    | 6 10 JUDITH | 11.0  | 44.5 | 25  | 0   |
| 1966          | 9 27 12 | 10 JUDITH   | 11.2  | 45.8 | 25  | 0   |

|      |    |    |    |    |        |      |      |    |      |
|------|----|----|----|----|--------|------|------|----|------|
| 1966 | 9  | 27 | 18 | 10 | JUDITH | 11.4 | 47.1 | 25 | 0    |
| 1966 | 9  | 28 | 0  | 10 | JUDITH | 11.6 | 48.4 | 30 | 0    |
| 1966 | 9  | 28 | 6  | 10 | JUDITH | 11.9 | 49.8 | 30 | 0    |
| 1966 | 9  | 28 | 12 | 10 | JUDITH | 12.2 | 51.2 | 40 | 0    |
| 1966 | 9  | 28 | 18 | 10 | JUDITH | 12.5 | 52.7 | 40 | 0    |
| 1966 | 9  | 29 | 0  | 10 | JUDITH | 12.8 | 54.2 | 40 | 1013 |
| 1966 | 9  | 29 | 6  | 10 | JUDITH | 13.1 | 56.1 | 40 | 0    |
| 1966 | 9  | 29 | 12 | 10 | JUDITH | 13.4 | 58.0 | 45 | 0    |
| 1966 | 9  | 29 | 18 | 10 | JUDITH | 13.6 | 59.7 | 45 | 1007 |
| 1966 | 9  | 30 | 0  | 10 | JUDITH | 13.8 | 61.2 | 30 | 0    |
| 1966 | 9  | 30 | 6  | 10 | JUDITH | 13.8 | 62.4 | 30 | 0    |
| 1966 | 9  | 30 | 12 | 10 | JUDITH | 13.8 | 63.4 | 30 | 0    |
| 1966 | 11 | 4  | 12 | 11 | LOIS   | 26.5 | 50.0 | 25 | 0    |
| 1966 | 11 | 4  | 18 | 11 | LOIS   | 26.5 | 52.2 | 25 | 0    |
| 1966 | 11 | 5  | 0  | 11 | LOIS   | 26.2 | 54.0 | 25 | 0    |
| 1966 | 11 | 5  | 6  | 11 | LOIS   | 25.6 | 55.4 | 25 | 0    |
| 1966 | 11 | 5  | 12 | 11 | LOIS   | 25.0 | 56.0 | 25 | 0    |
| 1966 | 11 | 5  | 18 | 11 | LOIS   | 24.8 | 55.7 | 25 | 998  |
| 1966 | 11 | 6  | 0  | 11 | LOIS   | 24.5 | 55.2 | 25 | 998  |
| 1966 | 11 | 6  | 6  | 11 | LOIS   | 24.3 | 54.6 | 30 | 0    |
| 1966 | 11 | 6  | 12 | 11 | LOIS   | 24.0 | 54.0 | 30 | 0    |
| 1966 | 11 | 6  | 18 | 11 | LOIS   | 23.9 | 53.5 | 50 | 995  |
| 1966 | 11 | 7  | 0  | 11 | LOIS   | 23.9 | 53.0 | 50 | 0    |
| 1966 | 11 | 7  | 6  | 11 | LOIS   | 23.8 | 52.6 | 50 | 0    |
| 1966 | 11 | 7  | 12 | 11 | LOIS   | 23.7 | 52.3 | 55 | 0    |
| 1966 | 11 | 7  | 18 | 11 | LOIS   | 24.0 | 51.4 | 60 | 986  |
| 1966 | 11 | 8  | 0  | 11 | LOIS   | 24.8 | 49.8 | 70 | 986  |
| 1966 | 11 | 8  | 6  | 11 | LOIS   | 25.8 | 47.7 | 70 | 0    |
| 1966 | 11 | 8  | 12 | 11 | LOIS   | 27.4 | 45.6 | 70 | 0    |
| 1966 | 11 | 8  | 18 | 11 | LOIS   | 30.1 | 43.4 | 70 | 0    |
| 1966 | 11 | 9  | 0  | 11 | LOIS   | 32.6 | 41.3 | 70 | 0    |
| 1966 | 11 | 9  | 6  | 11 | LOIS   | 34.2 | 39.8 | 70 | 0    |
| 1966 | 11 | 9  | 12 | 11 | LOIS   | 35.8 | 38.4 | 70 | 989  |
| 1966 | 11 | 9  | 18 | 11 | LOIS   | 37.3 | 36.8 | 70 | 989  |
| 1966 | 11 | 10 | 0  | 11 | LOIS   | 38.8 | 35.2 | 70 | 0    |
| 1966 | 11 | 10 | 6  | 11 | LOIS   | 40.0 | 33.7 | 70 | 0    |
| 1966 | 11 | 10 | 12 | 11 | LOIS   | 41.2 | 32.2 | 65 | 988  |
| 1966 | 11 | 10 | 18 | 11 | LOIS   | 42.6 | 30.5 | 65 | 0    |
| 1966 | 11 | 11 | 0  | 11 | LOIS   | 43.9 | 28.8 | 65 | 0    |
| 1966 | 11 | 11 | 6  | 11 | LOIS   | 45.0 | 27.2 | 65 | 0    |
| 1966 | 11 | 11 | 12 | 11 | LOIS   | 45.8 | 25.7 | 65 | 0    |
| 1966 | 11 | 11 | 18 | 11 | LOIS   | 46.4 | 23.9 | 65 | 0    |
| 1966 | 11 | 12 | 0  | 11 | LOIS   | 46.8 | 22.1 | 65 | 0    |
| 1966 | 11 | 12 | 6  | 11 | LOIS   | 47.0 | 21.0 | 60 | 0    |

|                       |      |      |    |      |
|-----------------------|------|------|----|------|
| 1966 11 12 12 11 LOIS | 46.7 | 20.0 | 55 | 0    |
| 1966 11 12 18 11 LOIS | 45.9 | 18.6 | 45 | 0    |
| 1966 11 13 0 11 LOIS  | 45.0 | 17.2 | 45 | 0    |
| 1966 11 13 6 11 LOIS  | 44.3 | 16.3 | 45 | 0    |
| 1966 11 13 12 11 LOIS | 43.5 | 15.5 | 45 | 1016 |
| 1966 11 13 18 11 LOIS | 42.5 | 14.8 | 45 | 0    |
| 1966 11 14 0 11 LOIS  | 41.2 | 14.3 | 45 | 0    |
| 1967 8 28 18 1 ARLENE | 15.8 | 35.8 | 30 | 0    |
| 1967 8 29 0 1 ARLENE  | 16.4 | 36.9 | 30 | 0    |
| 1967 8 29 6 1 ARLENE  | 17.1 | 37.8 | 30 | 0    |
| 1967 8 29 12 1 ARLENE | 17.8 | 39.0 | 30 | 0    |
| 1967 8 29 18 1 ARLENE | 18.5 | 40.1 | 30 | 0    |
| 1967 8 30 0 1 ARLENE  | 19.2 | 41.5 | 30 | 0    |
| 1967 8 30 6 1 ARLENE  | 19.8 | 42.8 | 30 | 0    |
| 1967 8 30 12 1 ARLENE | 20.9 | 44.8 | 35 | 0    |
| 1967 8 30 18 1 ARLENE | 22.0 | 46.2 | 35 | 1001 |
| 1967 8 31 0 1 ARLENE  | 23.2 | 47.6 | 35 | 0    |
| 1967 8 31 6 1 ARLENE  | 24.3 | 49.0 | 40 | 0    |
| 1967 8 31 12 1 ARLENE | 25.3 | 49.7 | 40 | 0    |
| 1967 8 31 18 1 ARLENE | 26.3 | 51.0 | 45 | 1008 |
| 1967 9 1 0 1 ARLENE   | 27.5 | 51.8 | 45 | 0    |
| 1967 9 1 6 1 ARLENE   | 28.7 | 52.7 | 45 | 0    |
| 1967 9 1 12 1 ARLENE  | 29.9 | 53.8 | 50 | 1009 |
| 1967 9 1 18 1 ARLENE  | 30.8 | 55.1 | 50 | 0    |
| 1967 9 2 0 1 ARLENE   | 31.9 | 56.3 | 55 | 1007 |
| 1967 9 2 6 1 ARLENE   | 33.2 | 56.8 | 55 | 0    |
| 1967 9 2 12 1 ARLENE  | 34.5 | 56.9 | 60 | 999  |
| 1967 9 2 18 1 ARLENE  | 36.1 | 56.7 | 60 | 0    |
| 1967 9 3 0 1 ARLENE   | 37.6 | 55.8 | 65 | 994  |
| 1967 9 3 6 1 ARLENE   | 39.2 | 54.9 | 70 | 0    |
| 1967 9 3 12 1 ARLENE  | 40.7 | 53.8 | 70 | 998  |
| 1967 9 3 18 1 ARLENE  | 43.3 | 52.0 | 75 | 0    |
| 1967 9 4 0 1 ARLENE   | 44.6 | 51.2 | 60 | 982  |
| 1967 9 4 6 1 ARLENE   | 45.8 | 48.6 | 60 | 0    |
| 1967 9 4 12 1 ARLENE  | 46.6 | 46.0 | 60 | 0    |
| 1967 9 4 18 1 ARLENE  | 46.7 | 45.7 | 60 | 0    |
| 1967 9 5 12 2 BEULAH  | 14.0 | 57.0 | 30 | 0    |
| 1967 9 5 18 2 BEULAH  | 13.9 | 57.8 | 30 | 1010 |
| 1967 9 6 0 2 BEULAH   | 13.8 | 58.5 | 30 | 0    |
| 1967 9 6 6 2 BEULAH   | 13.7 | 59.3 | 30 | 0    |
| 1967 9 6 12 2 BEULAH  | 13.6 | 60.0 | 30 | 0    |
| 1967 9 6 18 2 BEULAH  | 13.6 | 60.2 | 30 | 0    |
| 1967 9 7 0 2 BEULAH   | 13.7 | 60.5 | 30 | 0    |
| 1967 9 7 6 2 BEULAH   | 13.8 | 60.7 | 30 | 0    |

|      |   |    |    |   |        |      |      |     |      |
|------|---|----|----|---|--------|------|------|-----|------|
| 1967 | 9 | 7  | 12 | 2 | BEULAH | 13.9 | 60.8 | 40  | 1006 |
| 1967 | 9 | 7  | 18 | 2 | BEULAH | 14.0 | 61.1 | 45  | 0    |
| 1967 | 9 | 8  | 0  | 2 | BEULAH | 14.2 | 61.5 | 50  | 1005 |
| 1967 | 9 | 8  | 6  | 2 | BEULAH | 14.4 | 61.9 | 55  | 0    |
| 1967 | 9 | 8  | 12 | 2 | BEULAH | 14.5 | 62.2 | 60  | 996  |
| 1967 | 9 | 8  | 18 | 2 | BEULAH | 14.7 | 62.9 | 75  | 989  |
| 1967 | 9 | 9  | 0  | 2 | BEULAH | 15.0 | 63.7 | 80  | 0    |
| 1967 | 9 | 9  | 6  | 2 | BEULAH | 15.3 | 64.4 | 90  | 0    |
| 1967 | 9 | 9  | 12 | 2 | BEULAH | 15.8 | 65.1 | 100 | 0    |
| 1967 | 9 | 9  | 18 | 2 | BEULAH | 16.3 | 66.1 | 115 | 950  |
| 1967 | 9 | 10 | 0  | 2 | BEULAH | 16.8 | 66.7 | 120 | 0    |
| 1967 | 9 | 10 | 6  | 2 | BEULAH | 17.3 | 67.6 | 125 | 0    |
| 1967 | 9 | 10 | 12 | 2 | BEULAH | 17.5 | 68.2 | 130 | 947  |
| 1967 | 9 | 10 | 18 | 2 | BEULAH | 17.6 | 69.0 | 120 | 951  |
| 1967 | 9 | 11 | 0  | 2 | BEULAH | 17.7 | 69.9 | 110 | 967  |
| 1967 | 9 | 11 | 6  | 2 | BEULAH | 17.7 | 70.8 | 80  | 0    |
| 1967 | 9 | 11 | 12 | 2 | BEULAH | 17.7 | 71.5 | 75  | 0    |
| 1967 | 9 | 11 | 18 | 2 | BEULAH | 17.6 | 72.6 | 80  | 978  |
| 1967 | 9 | 12 | 0  | 2 | BEULAH | 17.6 | 73.3 | 65  | 1006 |
| 1967 | 9 | 12 | 6  | 2 | BEULAH | 17.5 | 74.1 | 65  | 997  |
| 1967 | 9 | 12 | 12 | 2 | BEULAH | 17.3 | 75.1 | 60  | 1000 |
| 1967 | 9 | 12 | 18 | 2 | BEULAH | 16.5 | 76.2 | 50  | 998  |
| 1967 | 9 | 13 | 0  | 2 | BEULAH | 16.2 | 76.8 | 50  | 1004 |
| 1967 | 9 | 13 | 6  | 2 | BEULAH | 16.0 | 77.3 | 50  | 0    |
| 1967 | 9 | 13 | 12 | 2 | BEULAH | 15.8 | 77.8 | 50  | 996  |
| 1967 | 9 | 13 | 18 | 2 | BEULAH | 15.8 | 78.1 | 50  | 997  |
| 1967 | 9 | 14 | 0  | 2 | BEULAH | 15.9 | 78.5 | 55  | 996  |
| 1967 | 9 | 14 | 6  | 2 | BEULAH | 16.0 | 79.0 | 60  | 998  |
| 1967 | 9 | 14 | 12 | 2 | BEULAH | 16.3 | 79.5 | 75  | 991  |
| 1967 | 9 | 14 | 18 | 2 | BEULAH | 16.8 | 80.1 | 90  | 989  |
| 1967 | 9 | 15 | 0  | 2 | BEULAH | 17.3 | 81.0 | 100 | 985  |
| 1967 | 9 | 15 | 6  | 2 | BEULAH | 17.6 | 81.6 | 100 | 0    |
| 1967 | 9 | 15 | 12 | 2 | BEULAH | 18.0 | 82.4 | 100 | 980  |
| 1967 | 9 | 15 | 18 | 2 | BEULAH | 18.5 | 83.3 | 100 | 978  |
| 1967 | 9 | 16 | 0  | 2 | BEULAH | 18.7 | 83.7 | 100 | 975  |
| 1967 | 9 | 16 | 6  | 2 | BEULAH | 19.2 | 84.4 | 100 | 970  |
| 1967 | 9 | 16 | 12 | 2 | BEULAH | 19.6 | 85.1 | 100 | 964  |
| 1967 | 9 | 16 | 18 | 2 | BEULAH | 19.9 | 85.6 | 100 | 967  |
| 1967 | 9 | 17 | 0  | 2 | BEULAH | 20.2 | 86.2 | 95  | 0    |
| 1967 | 9 | 17 | 6  | 2 | BEULAH | 20.6 | 87.2 | 90  | 0    |
| 1967 | 9 | 17 | 12 | 2 | BEULAH | 21.0 | 88.5 | 85  | 0    |
| 1967 | 9 | 17 | 18 | 2 | BEULAH | 21.2 | 89.4 | 85  | 0    |
| 1967 | 9 | 18 | 0  | 2 | BEULAH | 21.5 | 90.6 | 90  | 977  |
| 1967 | 9 | 18 | 6  | 2 | BEULAH | 21.6 | 91.8 | 95  | 978  |

|      |         |          |      |       |     |      |
|------|---------|----------|------|-------|-----|------|
| 1967 | 9 18 12 | 2 BEULAH | 21.8 | 92.7  | 95  | 970  |
| 1967 | 9 18 18 | 2 BEULAH | 22.1 | 93.7  | 100 | 967  |
| 1967 | 9 19 0  | 2 BEULAH | 22.4 | 94.2  | 105 | 0    |
| 1967 | 9 19 6  | 2 BEULAH | 22.8 | 94.8  | 110 | 949  |
| 1967 | 9 19 12 | 2 BEULAH | 23.5 | 95.7  | 125 | 961  |
| 1967 | 9 19 18 | 2 BEULAH | 23.9 | 96.0  | 135 | 923  |
| 1967 | 9 20 0  | 2 BEULAH | 24.2 | 96.2  | 140 | 923  |
| 1967 | 9 20 6  | 2 BEULAH | 25.1 | 96.8  | 140 | 931  |
| 1967 | 9 20 12 | 2 BEULAH | 25.9 | 97.2  | 140 | 0    |
| 1967 | 9 20 18 | 2 BEULAH | 26.4 | 97.7  | 90  | 0    |
| 1967 | 9 21 0  | 2 BEULAH | 27.3 | 98.1  | 70  | 0    |
| 1967 | 9 21 6  | 2 BEULAH | 27.7 | 98.4  | 65  | 0    |
| 1967 | 9 21 12 | 2 BEULAH | 27.7 | 98.7  | 45  | 0    |
| 1967 | 9 21 18 | 2 BEULAH | 27.2 | 99.2  | 35  | 0    |
| 1967 | 9 22 0  | 2 BEULAH | 26.7 | 99.5  | 35  | 0    |
| 1967 | 9 22 6  | 2 BEULAH | 26.5 | 99.7  | 35  | 0    |
| 1967 | 9 22 12 | 2 BEULAH | 26.1 | 100.0 | 30  | 0    |
| 1967 | 9 22 18 | 2 BEULAH | 25.8 | 100.3 | 30  | 0    |
| 1967 | 9 5 0   | 3 CHLOE  | 15.4 | 20.3  | 30  | 0    |
| 1967 | 9 5 6   | 3 CHLOE  | 15.7 | 21.7  | 30  | 0    |
| 1967 | 9 5 12  | 3 CHLOE  | 15.9 | 23.1  | 30  | 1008 |
| 1967 | 9 5 18  | 3 CHLOE  | 16.1 | 24.5  | 30  | 1008 |
| 1967 | 9 6 0   | 3 CHLOE  | 16.4 | 26.0  | 30  | 0    |
| 1967 | 9 6 6   | 3 CHLOE  | 16.8 | 27.5  | 30  | 0    |
| 1967 | 9 6 12  | 3 CHLOE  | 17.1 | 29.0  | 30  | 0    |
| 1967 | 9 6 18  | 3 CHLOE  | 17.5 | 30.7  | 30  | 0    |
| 1967 | 9 7 0   | 3 CHLOE  | 18.0 | 32.1  | 30  | 0    |
| 1967 | 9 7 6   | 3 CHLOE  | 18.6 | 33.5  | 30  | 0    |
| 1967 | 9 7 12  | 3 CHLOE  | 19.3 | 34.7  | 30  | 0    |
| 1967 | 9 7 18  | 3 CHLOE  | 20.0 | 35.8  | 30  | 0    |
| 1967 | 9 8 0   | 3 CHLOE  | 20.7 | 36.8  | 30  | 0    |
| 1967 | 9 8 6   | 3 CHLOE  | 21.7 | 37.6  | 30  | 0    |
| 1967 | 9 8 12  | 3 CHLOE  | 22.7 | 38.0  | 35  | 0    |
| 1967 | 9 8 18  | 3 CHLOE  | 23.7 | 38.3  | 40  | 0    |
| 1967 | 9 9 0   | 3 CHLOE  | 24.8 | 38.8  | 45  | 0    |
| 1967 | 9 9 6   | 3 CHLOE  | 25.8 | 39.1  | 60  | 0    |
| 1967 | 9 9 12  | 3 CHLOE  | 26.3 | 39.4  | 65  | 0    |
| 1967 | 9 9 18  | 3 CHLOE  | 26.7 | 39.6  | 75  | 997  |
| 1967 | 9 10 0  | 3 CHLOE  | 26.6 | 40.4  | 65  | 0    |
| 1967 | 9 10 6  | 3 CHLOE  | 26.5 | 41.4  | 70  | 0    |
| 1967 | 9 10 12 | 3 CHLOE  | 26.4 | 42.7  | 70  | 0    |
| 1967 | 9 10 18 | 3 CHLOE  | 26.3 | 43.9  | 70  | 998  |
| 1967 | 9 11 0  | 3 CHLOE  | 26.2 | 45.0  | 70  | 0    |
| 1967 | 9 11 6  | 3 CHLOE  | 26.1 | 46.2  | 75  | 0    |

|      |         |         |      |       |    |      |
|------|---------|---------|------|-------|----|------|
| 1967 | 9 11 12 | 3 CHLOE | 26.0 | 47.3  | 80 | 0    |
| 1967 | 9 11 18 | 3 CHLOE | 26.2 | 48.7  | 85 | 987  |
| 1967 | 9 12 0  | 3 CHLOE | 26.5 | 49.3  | 85 | 0    |
| 1967 | 9 12 6  | 3 CHLOE | 26.8 | 49.7  | 85 | 0    |
| 1967 | 9 12 12 | 3 CHLOE | 27.3 | 50.2  | 90 | 0    |
| 1967 | 9 12 18 | 3 CHLOE | 27.7 | 50.7  | 90 | 964  |
| 1967 | 9 13 0  | 3 CHLOE | 27.9 | 50.9  | 95 | 0    |
| 1967 | 9 13 6  | 3 CHLOE | 28.2 | 51.2  | 95 | 0    |
| 1967 | 9 13 12 | 3 CHLOE | 28.4 | 51.5  | 95 | 0    |
| 1967 | 9 13 18 | 3 CHLOE | 28.8 | 51.9  | 95 | 958  |
| 1967 | 9 14 0  | 3 CHLOE | 29.0 | 52.2  | 95 | 0    |
| 1967 | 9 14 6  | 3 CHLOE | 29.4 | 52.6  | 95 | 0    |
| 1967 | 9 14 12 | 3 CHLOE | 30.0 | 53.3  | 90 | 0    |
| 1967 | 9 14 18 | 3 CHLOE | 30.8 | 54.1  | 90 | 962  |
| 1967 | 9 15 0  | 3 CHLOE | 31.7 | 54.9  | 85 | 0    |
| 1967 | 9 15 6  | 3 CHLOE | 32.6 | 55.8  | 80 | 0    |
| 1967 | 9 15 12 | 3 CHLOE | 33.5 | 56.6  | 80 | 0    |
| 1967 | 9 15 18 | 3 CHLOE | 34.5 | 57.2  | 80 | 973  |
| 1967 | 9 16 0  | 3 CHLOE | 35.6 | 57.6  | 80 | 0    |
| 1967 | 9 16 6  | 3 CHLOE | 36.7 | 57.8  | 80 | 0    |
| 1967 | 9 16 12 | 3 CHLOE | 37.8 | 57.8  | 80 | 0    |
| 1967 | 9 16 18 | 3 CHLOE | 38.9 | 57.8  | 80 | 970  |
| 1967 | 9 17 0  | 3 CHLOE | 40.0 | 56.9  | 80 | 0    |
| 1967 | 9 17 6  | 3 CHLOE | 40.8 | 55.1  | 80 | 0    |
| 1967 | 9 17 12 | 3 CHLOE | 41.4 | 53.0  | 80 | 0    |
| 1967 | 9 17 18 | 3 CHLOE | 41.9 | 50.7  | 80 | 967  |
| 1967 | 9 18 0  | 3 CHLOE | 42.3 | 47.8  | 80 | 0    |
| 1967 | 9 18 6  | 3 CHLOE | 42.7 | 44.8  | 75 | 0    |
| 1967 | 9 18 12 | 3 CHLOE | 43.0 | 41.8  | 75 | 0    |
| 1967 | 9 18 18 | 3 CHLOE | 43.4 | 38.5  | 75 | 969  |
| 1967 | 9 19 0  | 3 CHLOE | 44.0 | 35.0  | 75 | 0    |
| 1967 | 9 19 6  | 3 CHLOE | 44.5 | 31.5  | 75 | 0    |
| 1967 | 9 19 12 | 3 CHLOE | 44.9 | 28.0  | 75 | 0    |
| 1967 | 9 19 18 | 3 CHLOE | 44.8 | 24.8  | 75 | 0    |
| 1967 | 9 20 0  | 3 CHLOE | 44.6 | 21.5  | 70 | 0    |
| 1967 | 9 20 6  | 3 CHLOE | 44.3 | 18.1  | 70 | 0    |
| 1967 | 9 20 12 | 3 CHLOE | 44.0 | 15.0  | 60 | 0    |
| 1967 | 9 20 18 | 3 CHLOE | 44.2 | 11.8  | 55 | 0    |
| 1967 | 9 21 0  | 3 CHLOE | 44.3 | 8.5   | 45 | 992  |
| 1967 | 9 21 6  | 3 CHLOE | 44.6 | 5.1   | 40 | 0    |
| 1967 | 9 21 12 | 3 CHLOE | 44.8 | 1.8   | 40 | 0    |
| 1967 | 9 21 18 | 3 CHLOE | 45.1 | 358.5 | 35 | 996  |
| 1967 | 9 8 0   | 4 DORIA | 28.5 | 77.5  | 25 | 1010 |
| 1967 | 9 8 6   | 4 DORIA | 28.0 | 78.1  | 25 | 0    |

|      |   |    |    |   |       |      |      |    |      |
|------|---|----|----|---|-------|------|------|----|------|
| 1967 | 9 | 8  | 12 | 4 | DORIA | 27.7 | 78.6 | 25 | 1007 |
| 1967 | 9 | 8  | 18 | 4 | DORIA | 27.7 | 78.9 | 25 | 0    |
| 1967 | 9 | 9  | 0  | 4 | DORIA | 27.7 | 79.1 | 30 | 0    |
| 1967 | 9 | 9  | 6  | 4 | DORIA | 27.8 | 79.2 | 35 | 0    |
| 1967 | 9 | 9  | 12 | 4 | DORIA | 27.9 | 79.1 | 35 | 1004 |
| 1967 | 9 | 9  | 18 | 4 | DORIA | 28.2 | 78.7 | 35 | 0    |
| 1967 | 9 | 10 | 0  | 4 | DORIA | 29.1 | 78.0 | 40 | 997  |
| 1967 | 9 | 10 | 6  | 4 | DORIA | 30.5 | 77.0 | 65 | 0    |
| 1967 | 9 | 10 | 12 | 4 | DORIA | 31.8 | 76.1 | 65 | 0    |
| 1967 | 9 | 10 | 18 | 4 | DORIA | 33.2 | 75.1 | 65 | 984  |
| 1967 | 9 | 11 | 0  | 4 | DORIA | 34.2 | 73.6 | 65 | 0    |
| 1967 | 9 | 11 | 6  | 4 | DORIA | 35.1 | 72.1 | 60 | 0    |
| 1967 | 9 | 11 | 12 | 4 | DORIA | 35.9 | 70.6 | 60 | 999  |
| 1967 | 9 | 11 | 18 | 4 | DORIA | 36.2 | 69.2 | 50 | 998  |
| 1967 | 9 | 12 | 0  | 4 | DORIA | 36.3 | 67.8 | 65 | 0    |
| 1967 | 9 | 12 | 6  | 4 | DORIA | 36.5 | 66.6 | 65 | 0    |
| 1967 | 9 | 12 | 12 | 4 | DORIA | 36.6 | 65.7 | 70 | 0    |
| 1967 | 9 | 12 | 18 | 4 | DORIA | 36.7 | 64.9 | 70 | 0    |
| 1967 | 9 | 13 | 0  | 4 | DORIA | 36.8 | 64.7 | 70 | 989  |
| 1967 | 9 | 13 | 6  | 4 | DORIA | 36.9 | 64.5 | 70 | 0    |
| 1967 | 9 | 13 | 12 | 4 | DORIA | 37.0 | 64.7 | 70 | 0    |
| 1967 | 9 | 13 | 18 | 4 | DORIA | 37.1 | 64.9 | 75 | 983  |
| 1967 | 9 | 14 | 0  | 4 | DORIA | 37.3 | 65.3 | 75 | 0    |
| 1967 | 9 | 14 | 6  | 4 | DORIA | 37.5 | 65.6 | 75 | 0    |
| 1967 | 9 | 14 | 12 | 4 | DORIA | 37.7 | 66.0 | 75 | 0    |
| 1967 | 9 | 14 | 18 | 4 | DORIA | 38.0 | 66.5 | 70 | 973  |
| 1967 | 9 | 15 | 0  | 4 | DORIA | 38.0 | 67.1 | 65 | 980  |
| 1967 | 9 | 15 | 6  | 4 | DORIA | 38.0 | 67.8 | 65 | 0    |
| 1967 | 9 | 15 | 12 | 4 | DORIA | 38.0 | 68.9 | 70 | 0    |
| 1967 | 9 | 15 | 18 | 4 | DORIA | 37.9 | 70.5 | 70 | 975  |
| 1967 | 9 | 16 | 0  | 4 | DORIA | 37.9 | 71.9 | 70 | 981  |
| 1967 | 9 | 16 | 6  | 4 | DORIA | 37.8 | 73.3 | 70 | 986  |
| 1967 | 9 | 16 | 12 | 4 | DORIA | 37.7 | 74.5 | 60 | 0    |
| 1967 | 9 | 16 | 18 | 4 | DORIA | 37.3 | 75.3 | 55 | 990  |
| 1967 | 9 | 17 | 0  | 4 | DORIA | 36.5 | 75.9 | 45 | 0    |
| 1967 | 9 | 17 | 6  | 4 | DORIA | 35.6 | 76.2 | 35 | 0    |
| 1967 | 9 | 17 | 12 | 4 | DORIA | 34.7 | 76.3 | 30 | 1006 |
| 1967 | 9 | 17 | 18 | 4 | DORIA | 33.8 | 76.2 | 30 | 0    |
| 1967 | 9 | 18 | 0  | 4 | DORIA | 33.1 | 76.0 | 30 | 1006 |
| 1967 | 9 | 18 | 6  | 4 | DORIA | 32.4 | 75.6 | 30 | 0    |
| 1967 | 9 | 18 | 12 | 4 | DORIA | 31.9 | 75.0 | 25 | 1006 |
| 1967 | 9 | 18 | 18 | 4 | DORIA | 31.5 | 74.5 | 25 | 1006 |
| 1967 | 9 | 19 | 0  | 4 | DORIA | 31.0 | 74.0 | 25 | 0    |
| 1967 | 9 | 19 | 6  | 4 | DORIA | 30.5 | 73.4 | 25 | 0    |

|      |    |    |    |   |        |      |      |    |      |
|------|----|----|----|---|--------|------|------|----|------|
| 1967 | 9  | 19 | 12 | 4 | DORIA  | 30.0 | 73.0 | 25 | 0    |
| 1967 | 9  | 19 | 18 | 4 | DORIA  | 29.6 | 72.3 | 25 | 0    |
| 1967 | 9  | 20 | 0  | 4 | DORIA  | 29.5 | 71.5 | 25 | 1010 |
| 1967 | 9  | 20 | 6  | 4 | DORIA  | 29.5 | 70.8 | 25 | 0    |
| 1967 | 9  | 20 | 12 | 4 | DORIA  | 29.5 | 70.0 | 25 | 0    |
| 1967 | 9  | 20 | 18 | 4 | DORIA  | 29.5 | 69.3 | 25 | 0    |
| 1967 | 9  | 21 | 0  | 4 | DORIA  | 29.5 | 68.5 | 25 | 0    |
| 1967 | 9  | 21 | 6  | 4 | DORIA  | 29.5 | 67.9 | 25 | 0    |
| 1967 | 9  | 21 | 12 | 4 | DORIA  | 29.5 | 67.5 | 25 | 0    |
| 1967 | 9  | 26 | 12 | 5 | EDITH  | 12.5 | 47.0 | 30 | 0    |
| 1967 | 9  | 26 | 18 | 5 | EDITH  | 12.6 | 48.4 | 30 | 1005 |
| 1967 | 9  | 27 | 0  | 5 | EDITH  | 12.8 | 49.8 | 30 | 0    |
| 1967 | 9  | 27 | 6  | 5 | EDITH  | 13.0 | 50.5 | 30 | 0    |
| 1967 | 9  | 27 | 12 | 5 | EDITH  | 13.2 | 51.2 | 30 | 1008 |
| 1967 | 9  | 27 | 18 | 5 | EDITH  | 13.5 | 52.1 | 30 | 1008 |
| 1967 | 9  | 28 | 0  | 5 | EDITH  | 13.9 | 53.0 | 30 | 1005 |
| 1967 | 9  | 28 | 6  | 5 | EDITH  | 14.2 | 54.0 | 30 | 0    |
| 1967 | 9  | 28 | 12 | 5 | EDITH  | 14.4 | 55.1 | 40 | 1002 |
| 1967 | 9  | 28 | 18 | 5 | EDITH  | 14.5 | 56.0 | 45 | 1000 |
| 1967 | 9  | 29 | 0  | 5 | EDITH  | 14.6 | 57.0 | 50 | 0    |
| 1967 | 9  | 29 | 6  | 5 | EDITH  | 14.6 | 57.6 | 40 | 0    |
| 1967 | 9  | 29 | 12 | 5 | EDITH  | 14.7 | 58.2 | 35 | 1007 |
| 1967 | 9  | 29 | 18 | 5 | EDITH  | 14.9 | 58.7 | 35 | 1005 |
| 1967 | 9  | 30 | 0  | 5 | EDITH  | 14.8 | 59.8 | 35 | 0    |
| 1967 | 9  | 30 | 6  | 5 | EDITH  | 14.6 | 60.9 | 30 | 0    |
| 1967 | 9  | 30 | 12 | 5 | EDITH  | 14.5 | 62.0 | 30 | 1010 |
| 1967 | 9  | 30 | 18 | 5 | EDITH  | 14.5 | 63.0 | 30 | 1008 |
| 1967 | 10 | 1  | 0  | 5 | EDITH  | 14.5 | 64.0 | 30 | 0    |
| 1967 | 10 | 1  | 6  | 5 | EDITH  | 14.5 | 64.7 | 30 | 0    |
| 1967 | 10 | 1  | 12 | 5 | EDITH  | 14.5 | 65.5 | 30 | 0    |
| 1967 | 10 | 1  | 18 | 6 | FERN   | 20.3 | 93.0 | 25 | 1005 |
| 1967 | 10 | 2  | 0  | 6 | FERN   | 20.7 | 93.0 | 30 | 1005 |
| 1967 | 10 | 2  | 6  | 6 | FERN   | 21.5 | 93.0 | 35 | 0    |
| 1967 | 10 | 2  | 12 | 6 | FERN   | 22.1 | 93.1 | 50 | 0    |
| 1967 | 10 | 2  | 18 | 6 | FERN   | 22.4 | 93.4 | 60 | 0    |
| 1967 | 10 | 3  | 0  | 6 | FERN   | 22.6 | 93.7 | 75 | 987  |
| 1967 | 10 | 3  | 6  | 6 | FERN   | 22.7 | 94.6 | 65 | 999  |
| 1967 | 10 | 3  | 12 | 6 | FERN   | 22.8 | 95.5 | 65 | 993  |
| 1967 | 10 | 3  | 18 | 6 | FERN   | 22.8 | 96.2 | 65 | 996  |
| 1967 | 10 | 4  | 0  | 6 | FERN   | 22.8 | 97.2 | 65 | 0    |
| 1967 | 10 | 4  | 6  | 6 | FERN   | 22.6 | 97.8 | 65 | 0    |
| 1967 | 10 | 4  | 12 | 6 | FERN   | 22.4 | 98.3 | 35 | 0    |
| 1967 | 10 | 4  | 18 | 6 | FERN   | 22.2 | 98.8 | 30 | 0    |
| 1967 | 10 | 5  | 12 | 7 | GINGER | 17.0 | 18.3 | 30 | 0    |



|               |          |      |      |    |      |
|---------------|----------|------|------|----|------|
| 1967 10 5 18  | 7 GINGER | 17.5 | 18.2 | 30 | 0    |
| 1967 10 6 0   | 7 GINGER | 18.0 | 18.1 | 35 | 0    |
| 1967 10 6 6   | 7 GINGER | 18.5 | 18.2 | 40 | 0    |
| 1967 10 6 12  | 7 GINGER | 19.0 | 18.5 | 40 | 0    |
| 1967 10 6 18  | 7 GINGER | 19.5 | 18.9 | 45 | 1002 |
| 1967 10 7 0   | 7 GINGER | 20.0 | 19.3 | 40 | 0    |
| 1967 10 7 6   | 7 GINGER | 20.4 | 19.8 | 30 | 0    |
| 1967 10 7 12  | 7 GINGER | 20.5 | 20.5 | 30 | 1012 |
| 1967 10 7 18  | 7 GINGER | 20.4 | 21.2 | 30 | 0    |
| 1967 10 8 0   | 7 GINGER | 20.3 | 22.0 | 30 | 0    |
| 1967 10 8 6   | 7 GINGER | 20.2 | 22.8 | 30 | 0    |
| 1967 10 8 12  | 7 GINGER | 20.0 | 23.6 | 30 | 0    |
| 1967 10 8 18  | 7 GINGER | 19.7 | 24.3 | 25 | 0    |
| 1967 10 19 12 | 8 HEIDI  | 20.5 | 54.0 | 25 | 0    |
| 1967 10 19 18 | 8 HEIDI  | 20.7 | 55.5 | 25 | 0    |
| 1967 10 20 0  | 8 HEIDI  | 20.9 | 57.0 | 30 | 0    |
| 1967 10 20 6  | 8 HEIDI  | 21.0 | 58.5 | 30 | 0    |
| 1967 10 20 12 | 8 HEIDI  | 21.1 | 60.0 | 30 | 0    |
| 1967 10 20 18 | 8 HEIDI  | 21.4 | 61.5 | 35 | 1008 |
| 1967 10 21 0  | 8 HEIDI  | 21.9 | 62.9 | 40 | 0    |
| 1967 10 21 6  | 8 HEIDI  | 22.4 | 64.1 | 40 | 0    |
| 1967 10 21 12 | 8 HEIDI  | 23.2 | 65.2 | 40 | 0    |
| 1967 10 21 18 | 8 HEIDI  | 24.5 | 66.1 | 40 | 1005 |
| 1967 10 22 0  | 8 HEIDI  | 25.8 | 66.8 | 45 | 0    |
| 1967 10 22 6  | 8 HEIDI  | 26.9 | 67.0 | 50 | 0    |
| 1967 10 22 12 | 8 HEIDI  | 28.1 | 66.5 | 55 | 1006 |
| 1967 10 22 18 | 8 HEIDI  | 29.4 | 65.6 | 60 | 0    |
| 1967 10 23 0  | 8 HEIDI  | 30.8 | 64.3 | 65 | 995  |
| 1967 10 23 6  | 8 HEIDI  | 32.1 | 62.7 | 65 | 0    |
| 1967 10 23 12 | 8 HEIDI  | 32.8 | 60.9 | 75 | 0    |
| 1967 10 23 18 | 8 HEIDI  | 33.0 | 58.5 | 75 | 0    |
| 1967 10 24 0  | 8 HEIDI  | 33.0 | 56.2 | 75 | 0    |
| 1967 10 24 6  | 8 HEIDI  | 33.0 | 54.5 | 70 | 0    |
| 1967 10 24 12 | 8 HEIDI  | 33.0 | 52.9 | 70 | 999  |
| 1967 10 24 18 | 8 HEIDI  | 33.1 | 51.3 | 70 | 0    |
| 1967 10 25 0  | 8 HEIDI  | 33.4 | 50.1 | 75 | 0    |
| 1967 10 25 6  | 8 HEIDI  | 33.9 | 49.3 | 75 | 0    |
| 1967 10 25 12 | 8 HEIDI  | 34.5 | 48.5 | 75 | 989  |
| 1967 10 25 18 | 8 HEIDI  | 34.9 | 47.7 | 75 | 0    |
| 1967 10 26 0  | 8 HEIDI  | 35.3 | 46.9 | 80 | 0    |
| 1967 10 26 6  | 8 HEIDI  | 35.6 | 46.3 | 80 | 0    |
| 1967 10 26 12 | 8 HEIDI  | 35.9 | 46.1 | 80 | 0    |
| 1967 10 26 18 | 8 HEIDI  | 36.2 | 46.1 | 80 | 981  |
| 1967 10 27 0  | 8 HEIDI  | 36.5 | 46.2 | 80 | 0    |

|                       |      |      |    |      |
|-----------------------|------|------|----|------|
| 1967 10 27 6 8 HEIDI  | 36.7 | 46.2 | 75 | 0    |
| 1967 10 27 12 8 HEIDI | 37.0 | 46.0 | 75 | 991  |
| 1967 10 27 18 8 HEIDI | 37.5 | 45.6 | 70 | 0    |
| 1967 10 28 0 8 HEIDI  | 38.0 | 45.1 | 70 | 0    |
| 1967 10 28 6 8 HEIDI  | 38.4 | 44.6 | 70 | 0    |
| 1967 10 28 12 8 HEIDI | 38.7 | 44.1 | 70 | 994  |
| 1967 10 28 18 8 HEIDI | 39.0 | 43.9 | 70 | 0    |
| 1967 10 29 0 8 HEIDI  | 39.2 | 43.9 | 65 | 0    |
| 1967 10 29 6 8 HEIDI  | 39.3 | 43.9 | 65 | 0    |
| 1967 10 29 12 8 HEIDI | 39.3 | 44.1 | 60 | 0    |
| 1967 10 29 18 8 HEIDI | 39.1 | 44.6 | 55 | 0    |
| 1967 10 30 0 8 HEIDI  | 38.8 | 45.1 | 50 | 0    |
| 1967 10 30 6 8 HEIDI  | 38.7 | 45.6 | 55 | 0    |
| 1967 10 30 12 8 HEIDI | 38.9 | 46.1 | 60 | 0    |
| 1967 10 30 18 8 HEIDI | 39.5 | 46.5 | 60 | 0    |
| 1967 10 31 0 8 HEIDI  | 40.3 | 46.7 | 60 | 0    |
| 1967 10 31 6 8 HEIDI  | 41.2 | 46.2 | 55 | 0    |
| 1967 10 31 12 8 HEIDI | 42.1 | 45.0 | 55 | 0    |
| 1967 10 31 18 8 HEIDI | 42.7 | 43.6 | 50 | 0    |
| 1967 11 1 0 8 HEIDI   | 43.0 | 42.0 | 45 | 0    |
| 1967 11 1 6 8 HEIDI   | 43.0 | 40.3 | 40 | 0    |
| 1967 11 1 12 8 HEIDI  | 43.0 | 38.5 | 40 | 0    |
| 1967 11 1 18 8 HEIDI  | 43.0 | 36.8 | 40 | 0    |
| 1968 6 1 6 1 ABBY     | 17.2 | 85.5 | 30 | 0    |
| 1968 6 1 12 1 ABBY    | 17.5 | 85.5 | 30 | 0    |
| 1968 6 1 18 1 ABBY    | 18.2 | 85.7 | 30 | 0    |
| 1968 6 2 0 1 ABBY     | 18.8 | 85.8 | 30 | 1005 |
| 1968 6 2 6 1 ABBY     | 19.7 | 85.7 | 30 | 0    |
| 1968 6 2 12 1 ABBY    | 20.5 | 85.3 | 30 | 0    |
| 1968 6 2 18 1 ABBY    | 21.4 | 84.8 | 40 | 1002 |
| 1968 6 3 0 1 ABBY     | 22.3 | 84.2 | 45 | 997  |
| 1968 6 3 6 1 ABBY     | 23.3 | 83.9 | 60 | 999  |
| 1968 6 3 12 1 ABBY    | 24.5 | 83.6 | 65 | 999  |
| 1968 6 3 18 1 ABBY    | 24.8 | 83.5 | 65 | 0    |
| 1968 6 4 0 1 ABBY     | 25.1 | 83.3 | 65 | 994  |
| 1968 6 4 6 1 ABBY     | 25.8 | 82.9 | 60 | 993  |
| 1968 6 4 12 1 ABBY    | 26.9 | 82.1 | 55 | 992  |
| 1968 6 4 18 1 ABBY    | 27.6 | 81.7 | 55 | 0    |
| 1968 6 5 0 1 ABBY     | 28.0 | 81.3 | 50 | 0    |
| 1968 6 5 6 1 ABBY     | 28.1 | 80.9 | 50 | 994  |
| 1968 6 5 12 1 ABBY    | 28.0 | 80.5 | 50 | 0    |
| 1968 6 5 18 1 ABBY    | 27.8 | 80.2 | 50 | 965  |
| 1968 6 6 0 1 ABBY     | 28.0 | 80.0 | 50 | 997  |
| 1968 6 6 6 1 ABBY     | 28.6 | 80.4 | 50 | 0    |

|      |   |    |    |   |        |      |      |    |      |
|------|---|----|----|---|--------|------|------|----|------|
| 1968 | 6 | 6  | 12 | 1 | ABBY   | 29.1 | 80.9 | 50 | 0    |
| 1968 | 6 | 6  | 18 | 1 | ABBY   | 29.9 | 81.2 | 50 | 0    |
| 1968 | 6 | 7  | 0  | 1 | ABBY   | 30.6 | 81.5 | 50 | 999  |
| 1968 | 6 | 7  | 6  | 1 | ABBY   | 31.4 | 81.8 | 50 | 0    |
| 1968 | 6 | 7  | 12 | 1 | ABBY   | 32.0 | 82.0 | 45 | 0    |
| 1968 | 6 | 7  | 18 | 1 | ABBY   | 32.6 | 82.0 | 30 | 0    |
| 1968 | 6 | 8  | 0  | 1 | ABBY   | 33.0 | 82.2 | 30 | 0    |
| 1968 | 6 | 8  | 6  | 1 | ABBY   | 33.5 | 82.2 | 30 | 0    |
| 1968 | 6 | 8  | 12 | 1 | ABBY   | 34.0 | 82.3 | 25 | 0    |
| 1968 | 6 | 8  | 18 | 1 | ABBY   | 34.4 | 82.3 | 25 | 0    |
| 1968 | 6 | 9  | 0  | 1 | ABBY   | 35.0 | 82.0 | 25 | 0    |
| 1968 | 6 | 9  | 6  | 1 | ABBY   | 35.3 | 81.8 | 25 | 0    |
| 1968 | 6 | 9  | 12 | 1 | ABBY   | 35.7 | 81.1 | 25 | 0    |
| 1968 | 6 | 9  | 18 | 1 | ABBY   | 35.9 | 80.3 | 25 | 0    |
| 1968 | 6 | 10 | 0  | 1 | ABBY   | 35.9 | 79.5 | 25 | 0    |
| 1968 | 6 | 10 | 6  | 1 | ABBY   | 35.6 | 78.9 | 25 | 0    |
| 1968 | 6 | 10 | 12 | 1 | ABBY   | 34.9 | 78.7 | 25 | 0    |
| 1968 | 6 | 10 | 18 | 1 | ABBY   | 34.2 | 79.0 | 25 | 0    |
| 1968 | 6 | 11 | 0  | 1 | ABBY   | 33.3 | 79.2 | 25 | 0    |
| 1968 | 6 | 11 | 6  | 1 | ABBY   | 33.2 | 79.0 | 25 | 0    |
| 1968 | 6 | 11 | 12 | 1 | ABBY   | 33.3 | 78.7 | 25 | 0    |
| 1968 | 6 | 11 | 18 | 1 | ABBY   | 33.4 | 78.5 | 25 | 0    |
| 1968 | 6 | 12 | 0  | 1 | ABBY   | 33.6 | 78.2 | 25 | 0    |
| 1968 | 6 | 12 | 6  | 1 | ABBY   | 33.8 | 78.0 | 25 | 0    |
| 1968 | 6 | 12 | 12 | 1 | ABBY   | 34.0 | 77.8 | 25 | 0    |
| 1968 | 6 | 12 | 18 | 1 | ABBY   | 34.7 | 77.1 | 25 | 0    |
| 1968 | 6 | 13 | 0  | 1 | ABBY   | 35.4 | 76.6 | 25 | 0    |
| 1968 | 6 | 13 | 6  | 1 | ABBY   | 36.1 | 75.9 | 25 | 0    |
| 1968 | 6 | 13 | 12 | 1 | ABBY   | 36.8 | 75.0 | 25 | 0    |
| 1968 | 6 | 13 | 18 | 1 | ABBY   | 37.2 | 74.5 | 25 | 0    |
| 1968 | 6 | 17 | 12 | 2 | BRENDA | 24.0 | 80.5 | 25 | 0    |
| 1968 | 6 | 17 | 18 | 2 | BRENDA | 24.5 | 80.8 | 25 | 1012 |
| 1968 | 6 | 18 | 0  | 2 | BRENDA | 25.0 | 81.0 | 25 | 0    |
| 1968 | 6 | 18 | 6  | 2 | BRENDA | 25.5 | 81.1 | 25 | 0    |
| 1968 | 6 | 18 | 12 | 2 | BRENDA | 26.0 | 81.2 | 25 | 0    |
| 1968 | 6 | 18 | 18 | 2 | BRENDA | 26.5 | 81.3 | 25 | 0    |
| 1968 | 6 | 19 | 0  | 2 | BRENDA | 27.0 | 81.3 | 25 | 0    |
| 1968 | 6 | 19 | 6  | 2 | BRENDA | 27.5 | 81.3 | 25 | 0    |
| 1968 | 6 | 19 | 12 | 2 | BRENDA | 28.0 | 81.2 | 25 | 0    |
| 1968 | 6 | 19 | 18 | 2 | BRENDA | 28.7 | 81.1 | 25 | 1012 |
| 1968 | 6 | 20 | 0  | 2 | BRENDA | 29.5 | 81.1 | 25 | 0    |
| 1968 | 6 | 20 | 6  | 2 | BRENDA | 30.1 | 80.6 | 25 | 0    |
| 1968 | 6 | 20 | 12 | 2 | BRENDA | 30.6 | 79.6 | 25 | 0    |
| 1968 | 6 | 20 | 18 | 2 | BRENDA | 30.9 | 78.5 | 25 | 0    |

|      |      |    |          |      |      |    |      |
|------|------|----|----------|------|------|----|------|
| 1968 | 6 21 | 0  | 2 BRENDA | 31.0 | 77.4 | 30 | 0    |
| 1968 | 6 21 | 6  | 2 BRENDA | 30.9 | 76.3 | 45 | 0    |
| 1968 | 6 21 | 12 | 2 BRENDA | 30.9 | 75.2 | 50 | 1005 |
| 1968 | 6 21 | 18 | 2 BRENDA | 30.8 | 74.2 | 55 | 995  |
| 1968 | 6 22 | 0  | 2 BRENDA | 30.8 | 73.4 | 55 | 993  |
| 1968 | 6 22 | 6  | 2 BRENDA | 31.1 | 72.9 | 60 | 0    |
| 1968 | 6 22 | 12 | 2 BRENDA | 31.5 | 72.5 | 60 | 998  |
| 1968 | 6 22 | 18 | 2 BRENDA | 32.1 | 71.8 | 60 | 997  |
| 1968 | 6 23 | 0  | 2 BRENDA | 32.7 | 71.2 | 60 | 997  |
| 1968 | 6 23 | 6  | 2 BRENDA | 33.7 | 70.1 | 60 | 995  |
| 1968 | 6 23 | 12 | 2 BRENDA | 34.7 | 68.4 | 65 | 992  |
| 1968 | 6 23 | 18 | 2 BRENDA | 35.1 | 66.6 | 65 | 0    |
| 1968 | 6 24 | 0  | 2 BRENDA | 35.5 | 64.3 | 65 | 991  |
| 1968 | 6 24 | 6  | 2 BRENDA | 35.5 | 61.8 | 65 | 990  |
| 1968 | 6 24 | 12 | 2 BRENDA | 35.6 | 59.3 | 65 | 990  |
| 1968 | 6 24 | 18 | 2 BRENDA | 35.7 | 56.6 | 65 | 0    |
| 1968 | 6 25 | 0  | 2 BRENDA | 35.8 | 54.0 | 60 | 997  |
| 1968 | 6 25 | 6  | 2 BRENDA | 36.2 | 51.5 | 60 | 0    |
| 1968 | 6 25 | 12 | 2 BRENDA | 36.8 | 49.0 | 60 | 994  |
| 1968 | 6 25 | 18 | 2 BRENDA | 37.3 | 46.3 | 50 | 0    |
| 1968 | 6 26 | 0  | 2 BRENDA | 37.8 | 43.5 | 45 | 0    |
| 1968 | 6 26 | 6  | 2 BRENDA | 38.4 | 40.7 | 30 | 0    |
| 1968 | 6 26 | 12 | 2 BRENDA | 39.0 | 38.0 | 30 | 0    |
| 1968 | 6 22 | 18 | 3 CANDY  | 20.0 | 96.0 | 25 | 0    |
| 1968 | 6 23 | 0  | 3 CANDY  | 21.5 | 96.0 | 30 | 0    |
| 1968 | 6 23 | 6  | 3 CANDY  | 23.1 | 96.0 | 30 | 0    |
| 1968 | 6 23 | 12 | 3 CANDY  | 24.8 | 96.1 | 30 | 0    |
| 1968 | 6 23 | 18 | 3 CANDY  | 26.4 | 96.6 | 45 | 1001 |
| 1968 | 6 24 | 0  | 3 CANDY  | 28.3 | 97.2 | 60 | 999  |
| 1968 | 6 24 | 6  | 3 CANDY  | 30.1 | 97.8 | 30 | 0    |
| 1968 | 6 24 | 12 | 3 CANDY  | 32.1 | 97.8 | 25 | 0    |
| 1968 | 6 24 | 18 | 3 CANDY  | 34.1 | 96.9 | 25 | 0    |
| 1968 | 6 25 | 0  | 3 CANDY  | 35.9 | 95.5 | 25 | 0    |
| 1968 | 6 25 | 6  | 3 CANDY  | 38.2 | 93.0 | 25 | 0    |
| 1968 | 6 25 | 12 | 3 CANDY  | 40.0 | 90.0 | 25 | 0    |
| 1968 | 6 25 | 18 | 3 CANDY  | 41.0 | 86.8 | 25 | 0    |
| 1968 | 6 26 | 0  | 3 CANDY  | 41.7 | 83.6 | 25 | 0    |
| 1968 | 6 26 | 6  | 3 CANDY  | 42.0 | 80.0 | 25 | 0    |
| 1968 | 8 10 | 0  | 4 DOLLY  | 25.0 | 79.0 | 25 | 1013 |
| 1968 | 8 10 | 6  | 4 DOLLY  | 25.9 | 80.0 | 25 | 0    |
| 1968 | 8 10 | 12 | 4 DOLLY  | 27.0 | 80.5 | 25 | 1012 |
| 1968 | 8 10 | 18 | 4 DOLLY  | 28.2 | 80.6 | 25 | 0    |
| 1968 | 8 11 | 0  | 4 DOLLY  | 29.4 | 80.4 | 25 | 1011 |
| 1968 | 8 11 | 6  | 4 DOLLY  | 30.6 | 79.9 | 25 | 0    |

|      |         |         |      |      |    |      |
|------|---------|---------|------|------|----|------|
| 1968 | 8 11 12 | 4 DOLLY | 31.8 | 78.8 | 30 | 0    |
| 1968 | 8 11 18 | 4 DOLLY | 32.9 | 77.1 | 30 | 0    |
| 1968 | 8 12 0  | 4 DOLLY | 33.8 | 75.2 | 30 | 1005 |
| 1968 | 8 12 6  | 4 DOLLY | 34.4 | 73.3 | 30 | 0    |
| 1968 | 8 12 12 | 4 DOLLY | 35.0 | 71.3 | 45 | 994  |
| 1968 | 8 12 18 | 4 DOLLY | 35.7 | 69.0 | 50 | 0    |
| 1968 | 8 13 0  | 4 DOLLY | 36.4 | 66.6 | 65 | 985  |
| 1968 | 8 13 6  | 4 DOLLY | 37.0 | 64.1 | 65 | 0    |
| 1968 | 8 13 12 | 4 DOLLY | 37.6 | 62.0 | 65 | 1001 |
| 1968 | 8 13 18 | 4 DOLLY | 38.2 | 59.9 | 45 | 0    |
| 1968 | 8 14 0  | 4 DOLLY | 38.8 | 57.5 | 55 | 999  |
| 1968 | 8 14 6  | 4 DOLLY | 39.3 | 54.4 | 60 | 0    |
| 1968 | 8 14 12 | 4 DOLLY | 39.8 | 51.3 | 70 | 992  |
| 1968 | 8 14 18 | 4 DOLLY | 40.2 | 48.8 | 65 | 0    |
| 1968 | 8 15 0  | 4 DOLLY | 40.6 | 46.0 | 65 | 0    |
| 1968 | 8 15 6  | 4 DOLLY | 40.7 | 43.8 | 65 | 0    |
| 1968 | 8 15 12 | 4 DOLLY | 40.8 | 41.2 | 65 | 999  |
| 1968 | 8 15 18 | 4 DOLLY | 40.9 | 38.9 | 65 | 0    |
| 1968 | 8 16 0  | 4 DOLLY | 41.3 | 36.3 | 65 | 1006 |
| 1968 | 8 16 6  | 4 DOLLY | 42.0 | 34.0 | 65 | 0    |
| 1968 | 8 16 12 | 4 DOLLY | 42.6 | 31.6 | 30 | 0    |
| 1968 | 8 16 18 | 4 DOLLY | 42.8 | 29.5 | 30 | 1011 |
| 1968 | 8 17 0  | 4 DOLLY | 42.8 | 26.5 | 30 | 0    |
| 1968 | 9 11 18 | 5 EDNA  | 12.7 | 21.1 | 25 | 0    |
| 1968 | 9 12 0  | 5 EDNA  | 13.0 | 22.3 | 25 | 0    |
| 1968 | 9 12 6  | 5 EDNA  | 13.4 | 23.8 | 25 | 0    |
| 1968 | 9 12 12 | 5 EDNA  | 13.7 | 25.2 | 30 | 0    |
| 1968 | 9 12 18 | 5 EDNA  | 13.9 | 26.3 | 30 | 0    |
| 1968 | 9 13 0  | 5 EDNA  | 14.0 | 27.2 | 30 | 0    |
| 1968 | 9 13 6  | 5 EDNA  | 14.2 | 28.3 | 30 | 0    |
| 1968 | 9 13 12 | 5 EDNA  | 14.3 | 29.2 | 30 | 0    |
| 1968 | 9 13 18 | 5 EDNA  | 14.5 | 30.0 | 30 | 0    |
| 1968 | 9 14 0  | 5 EDNA  | 14.8 | 30.9 | 30 | 0    |
| 1968 | 9 14 6  | 5 EDNA  | 15.0 | 31.8 | 30 | 0    |
| 1968 | 9 14 12 | 5 EDNA  | 15.3 | 32.9 | 30 | 0    |
| 1968 | 9 14 18 | 5 EDNA  | 15.6 | 34.0 | 30 | 0    |
| 1968 | 9 15 0  | 5 EDNA  | 15.8 | 34.9 | 50 | 1005 |
| 1968 | 9 15 6  | 5 EDNA  | 16.0 | 35.8 | 55 | 0    |
| 1968 | 9 15 12 | 5 EDNA  | 16.2 | 36.7 | 55 | 0    |
| 1968 | 9 15 18 | 5 EDNA  | 16.4 | 37.7 | 55 | 0    |
| 1968 | 9 16 0  | 5 EDNA  | 16.4 | 38.6 | 55 | 0    |
| 1968 | 9 16 6  | 5 EDNA  | 16.5 | 39.5 | 55 | 0    |
| 1968 | 9 16 12 | 5 EDNA  | 16.5 | 40.7 | 55 | 0    |
| 1968 | 9 16 18 | 5 EDNA  | 16.6 | 41.7 | 55 | 0    |

|      |      |    |             |      |      |    |      |
|------|------|----|-------------|------|------|----|------|
| 1968 | 9 17 | 0  | 5 EDNA      | 16.7 | 42.8 | 55 | 0    |
| 1968 | 9 17 | 6  | 5 EDNA      | 16.8 | 43.9 | 55 | 0    |
| 1968 | 9 17 | 12 | 5 EDNA      | 16.9 | 45.0 | 50 | 0    |
| 1968 | 9 17 | 18 | 5 EDNA      | 17.0 | 46.2 | 40 | 0    |
| 1968 | 9 18 | 0  | 5 EDNA      | 17.1 | 47.7 | 40 | 0    |
| 1968 | 9 18 | 6  | 5 EDNA      | 17.2 | 49.2 | 35 | 0    |
| 1968 | 9 18 | 12 | 5 EDNA      | 17.3 | 51.1 | 30 | 1013 |
| 1968 | 9 18 | 18 | 5 EDNA      | 17.4 | 52.7 | 25 | 0    |
| 1968 | 9 19 | 0  | 5 EDNA      | 17.6 | 54.3 | 25 | 0    |
| 1968 | 9 19 | 6  | 5 EDNA      | 17.8 | 55.8 | 25 | 0    |
| 1968 | 9 14 | 12 | 6 SUBTROP 1 | 31.5 | 73.0 | 20 | 1012 |
| 1968 | 9 14 | 18 | 6 SUBTROP 1 | 31.8 | 72.1 | 20 | 0    |
| 1968 | 9 15 | 0  | 6 SUBTROP 1 | 32.1 | 71.0 | 20 | 1009 |
| 1968 | 9 15 | 6  | 6 SUBTROP 1 | 32.5 | 69.8 | 25 | 0    |
| 1968 | 9 15 | 12 | 6 SUBTROP 1 | 33.0 | 68.5 | 25 | 1009 |
| 1968 | 9 15 | 18 | 6 SUBTROP 1 | 33.1 | 67.6 | 30 | 0    |
| 1968 | 9 16 | 0  | 6 SUBTROP 1 | 33.5 | 67.0 | 30 | 1006 |
| 1968 | 9 16 | 6  | 6 SUBTROP 1 | 34.8 | 67.6 | 35 | 0    |
| 1968 | 9 16 | 12 | 6 SUBTROP 1 | 36.0 | 68.0 | 40 | 1003 |
| 1968 | 9 16 | 18 | 6 SUBTROP 1 | 37.3 | 66.5 | 45 | 0    |
| 1968 | 9 17 | 0  | 6 SUBTROP 1 | 38.5 | 65.0 | 50 | 997  |
| 1968 | 9 17 | 6  | 6 SUBTROP 1 | 39.1 | 63.9 | 50 | 0    |
| 1968 | 9 17 | 12 | 6 SUBTROP 1 | 39.0 | 63.0 | 50 | 995  |
| 1968 | 9 17 | 18 | 6 SUBTROP 1 | 38.8 | 62.5 | 55 | 0    |
| 1968 | 9 18 | 0  | 6 SUBTROP 1 | 38.5 | 62.0 | 60 | 993  |
| 1968 | 9 18 | 6  | 6 SUBTROP 1 | 38.3 | 61.5 | 60 | 0    |
| 1968 | 9 18 | 12 | 6 SUBTROP 1 | 38.0 | 61.0 | 60 | 993  |
| 1968 | 9 18 | 18 | 6 SUBTROP 1 | 37.8 | 60.5 | 60 | 0    |
| 1968 | 9 19 | 0  | 6 SUBTROP 1 | 37.5 | 60.0 | 60 | 993  |
| 1968 | 9 19 | 6  | 6 SUBTROP 1 | 37.3 | 59.5 | 60 | 0    |
| 1968 | 9 19 | 12 | 6 SUBTROP 1 | 37.0 | 59.0 | 60 | 990  |
| 1968 | 9 19 | 18 | 6 SUBTROP 1 | 36.3 | 57.9 | 60 | 0    |
| 1968 | 9 20 | 0  | 6 SUBTROP 1 | 35.5 | 56.0 | 60 | 987  |
| 1968 | 9 20 | 6  | 6 SUBTROP 1 | 35.2 | 52.6 | 65 | 0    |
| 1968 | 9 20 | 12 | 6 SUBTROP 1 | 35.5 | 49.0 | 65 | 985  |
| 1968 | 9 20 | 18 | 6 SUBTROP 1 | 37.6 | 46.5 | 70 | 0    |
| 1968 | 9 21 | 0  | 6 SUBTROP 1 | 39.5 | 45.0 | 70 | 979  |
| 1968 | 9 21 | 6  | 6 SUBTROP 1 | 39.9 | 44.3 | 70 | 0    |
| 1968 | 9 21 | 12 | 6 SUBTROP 1 | 40.3 | 43.7 | 65 | 982  |
| 1968 | 9 21 | 18 | 6 SUBTROP 1 | 40.6 | 43.1 | 65 | 0    |
| 1968 | 9 22 | 0  | 6 SUBTROP 1 | 41.0 | 42.5 | 60 | 984  |
| 1968 | 9 22 | 6  | 6 SUBTROP 1 | 41.5 | 41.6 | 60 | 0    |
| 1968 | 9 22 | 12 | 6 SUBTROP 1 | 42.0 | 40.5 | 60 | 986  |
| 1968 | 9 22 | 18 | 6 SUBTROP 1 | 42.2 | 39.2 | 55 | 0    |

|      |       |    |             |      |      |    |      |
|------|-------|----|-------------|------|------|----|------|
| 1968 | 9 23  | 0  | 6 SUBTROP 1 | 42.3 | 38.0 | 55 | 992  |
| 1968 | 9 23  | 6  | 6 SUBTROP 1 | 42.4 | 36.9 | 50 | 0    |
| 1968 | 9 23  | 12 | 6 SUBTROP 1 | 42.5 | 36.0 | 45 | 995  |
| 1968 | 9 23  | 18 | 6 SUBTROP 1 | 42.5 | 35.0 | 40 | 997  |
| 1968 | 9 23  | 12 | 7 FRANCES   | 26.0 | 74.0 | 25 | 0    |
| 1968 | 9 23  | 18 | 7 FRANCES   | 26.7 | 74.2 | 25 | 0    |
| 1968 | 9 24  | 0  | 7 FRANCES   | 27.3 | 74.4 | 25 | 0    |
| 1968 | 9 24  | 6  | 7 FRANCES   | 28.0 | 74.4 | 25 | 0    |
| 1968 | 9 24  | 12 | 7 FRANCES   | 28.7 | 74.3 | 30 | 0    |
| 1968 | 9 24  | 18 | 7 FRANCES   | 29.4 | 74.1 | 30 | 1012 |
| 1968 | 9 25  | 0  | 7 FRANCES   | 30.1 | 73.4 | 30 | 0    |
| 1968 | 9 25  | 6  | 7 FRANCES   | 30.8 | 72.6 | 30 | 0    |
| 1968 | 9 25  | 12 | 7 FRANCES   | 31.3 | 71.7 | 30 | 1012 |
| 1968 | 9 25  | 18 | 7 FRANCES   | 31.9 | 70.7 | 30 | 0    |
| 1968 | 9 26  | 0  | 7 FRANCES   | 32.3 | 69.9 | 30 | 0    |
| 1968 | 9 26  | 6  | 7 FRANCES   | 32.7 | 69.2 | 30 | 0    |
| 1968 | 9 26  | 12 | 7 FRANCES   | 32.9 | 68.8 | 30 | 0    |
| 1968 | 9 26  | 18 | 7 FRANCES   | 33.2 | 68.2 | 45 | 1003 |
| 1968 | 9 27  | 0  | 7 FRANCES   | 33.5 | 67.7 | 45 | 0    |
| 1968 | 9 27  | 6  | 7 FRANCES   | 33.8 | 67.1 | 45 | 0    |
| 1968 | 9 27  | 12 | 7 FRANCES   | 34.2 | 66.2 | 50 | 0    |
| 1968 | 9 27  | 18 | 7 FRANCES   | 34.3 | 65.3 | 50 | 1001 |
| 1968 | 9 28  | 0  | 7 FRANCES   | 34.7 | 63.7 | 50 | 0    |
| 1968 | 9 28  | 6  | 7 FRANCES   | 34.9 | 61.9 | 45 | 0    |
| 1968 | 9 28  | 12 | 7 FRANCES   | 35.0 | 59.8 | 45 | 0    |
| 1968 | 9 28  | 18 | 7 FRANCES   | 35.3 | 57.8 | 40 | 1003 |
| 1968 | 9 29  | 0  | 7 FRANCES   | 35.4 | 55.7 | 40 | 0    |
| 1968 | 9 29  | 6  | 7 FRANCES   | 35.5 | 53.5 | 30 | 1007 |
| 1968 | 9 29  | 12 | 7 FRANCES   | 35.4 | 50.7 | 30 | 0    |
| 1968 | 9 29  | 18 | 7 FRANCES   | 35.3 | 48.1 | 30 | 0    |
| 1968 | 9 30  | 0  | 7 FRANCES   | 35.7 | 45.2 | 30 | 0    |
| 1968 | 9 30  | 6  | 7 FRANCES   | 36.2 | 42.3 | 30 | 0    |
| 1968 | 9 30  | 12 | 7 FRANCES   | 36.8 | 39.5 | 30 | 0    |
| 1968 | 9 30  | 18 | 7 FRANCES   | 37.5 | 36.5 | 30 | 0    |
| 1968 | 10 13 | 12 | 8 GLADYS    | 14.0 | 80.5 | 25 | 0    |
| 1968 | 10 13 | 18 | 8 GLADYS    | 14.6 | 80.9 | 25 | 0    |
| 1968 | 10 14 | 0  | 8 GLADYS    | 15.4 | 81.4 | 25 | 0    |
| 1968 | 10 14 | 6  | 8 GLADYS    | 16.1 | 81.7 | 25 | 0    |
| 1968 | 10 14 | 12 | 8 GLADYS    | 16.8 | 82.0 | 25 | 0    |
| 1968 | 10 14 | 18 | 8 GLADYS    | 17.5 | 82.4 | 30 | 0    |
| 1968 | 10 15 | 0  | 8 GLADYS    | 18.3 | 82.7 | 30 | 1003 |
| 1968 | 10 15 | 6  | 8 GLADYS    | 18.9 | 83.0 | 30 | 0    |
| 1968 | 10 15 | 12 | 8 GLADYS    | 19.4 | 83.3 | 45 | 999  |
| 1968 | 10 15 | 18 | 8 GLADYS    | 19.9 | 83.4 | 50 | 994  |

|                        |      |      |    |      |
|------------------------|------|------|----|------|
| 1968 10 16 0 8 GLADYS  | 20.5 | 83.5 | 50 | 0    |
| 1968 10 16 6 8 GLADYS  | 21.1 | 83.6 | 55 | 0    |
| 1968 10 16 12 8 GLADYS | 21.7 | 83.5 | 65 | 996  |
| 1968 10 16 18 8 GLADYS | 23.0 | 83.3 | 65 | 0    |
| 1968 10 17 0 8 GLADYS  | 24.3 | 83.3 | 65 | 990  |
| 1968 10 17 6 8 GLADYS  | 25.1 | 83.7 | 65 | 0    |
| 1968 10 17 12 8 GLADYS | 25.8 | 84.0 | 65 | 986  |
| 1968 10 17 18 8 GLADYS | 26.3 | 84.1 | 65 | 986  |
| 1968 10 18 0 8 GLADYS  | 26.7 | 84.2 | 65 | 990  |
| 1968 10 18 6 8 GLADYS  | 27.0 | 84.2 | 65 | 0    |
| 1968 10 18 12 8 GLADYS | 27.4 | 84.1 | 70 | 980  |
| 1968 10 18 18 8 GLADYS | 27.8 | 83.7 | 70 | 0    |
| 1968 10 19 0 8 GLADYS  | 28.3 | 83.1 | 70 | 977  |
| 1968 10 19 6 8 GLADYS  | 28.9 | 82.5 | 70 | 978  |
| 1968 10 19 12 8 GLADYS | 30.0 | 81.0 | 70 | 965  |
| 1968 10 19 18 8 GLADYS | 31.3 | 79.7 | 75 | 966  |
| 1968 10 20 0 8 GLADYS  | 32.9 | 78.2 | 75 | 0    |
| 1968 10 20 6 8 GLADYS  | 34.3 | 76.6 | 70 | 985  |
| 1968 10 20 12 8 GLADYS | 35.5 | 74.6 | 70 | 983  |
| 1968 10 20 18 8 GLADYS | 37.0 | 72.0 | 70 | 981  |
| 1968 10 21 0 8 GLADYS  | 38.6 | 68.3 | 65 | 0    |
| 1968 10 21 6 8 GLADYS  | 40.7 | 64.9 | 65 | 0    |
| 1968 10 21 12 8 GLADYS | 43.9 | 62.9 | 65 | 975  |
| 1968 10 21 18 8 GLADYS | 46.0 | 61.0 | 50 | 0    |
| 1969 7 25 6 1 ANNA     | 9.2  | 27.0 | 30 | 0    |
| 1969 7 25 12 1 ANNA    | 9.0  | 28.0 | 30 | 0    |
| 1969 7 25 18 1 ANNA    | 9.1  | 29.3 | 30 | 0    |
| 1969 7 26 0 1 ANNA     | 9.3  | 30.2 | 30 | 0    |
| 1969 7 26 6 1 ANNA     | 9.5  | 31.5 | 30 | 0    |
| 1969 7 26 12 1 ANNA    | 10.0 | 32.8 | 30 | 0    |
| 1969 7 26 18 1 ANNA    | 10.4 | 34.0 | 30 | 0    |
| 1969 7 27 0 1 ANNA     | 10.8 | 35.0 | 30 | 0    |
| 1969 7 27 6 1 ANNA     | 11.2 | 36.0 | 35 | 0    |
| 1969 7 27 12 1 ANNA    | 11.4 | 36.4 | 35 | 0    |
| 1969 7 27 18 1 ANNA    | 11.6 | 37.0 | 40 | 0    |
| 1969 7 28 0 1 ANNA     | 12.0 | 38.0 | 40 | 0    |
| 1969 7 28 6 1 ANNA     | 12.3 | 39.2 | 45 | 0    |
| 1969 7 28 12 1 ANNA    | 12.7 | 40.2 | 50 | 0    |
| 1969 7 28 18 1 ANNA    | 13.1 | 41.3 | 55 | 0    |
| 1969 7 29 0 1 ANNA     | 13.5 | 42.5 | 55 | 0    |
| 1969 7 29 6 1 ANNA     | 13.9 | 43.9 | 55 | 0    |
| 1969 7 29 12 1 ANNA    | 14.0 | 45.0 | 55 | 0    |
| 1969 7 29 18 1 ANNA    | 14.2 | 46.0 | 60 | 1003 |
| 1969 7 30 0 1 ANNA     | 14.5 | 47.6 | 55 | 0    |



|      |   |    |    |           |      |      |     |      |
|------|---|----|----|-----------|------|------|-----|------|
| 1969 | 7 | 30 | 6  | 1 ANNA    | 14.7 | 49.7 | 50  | 0    |
| 1969 | 7 | 30 | 12 | 1 ANNA    | 15.1 | 51.9 | 45  | 1005 |
| 1969 | 7 | 30 | 18 | 1 ANNA    | 15.7 | 53.7 | 45  | 0    |
| 1969 | 7 | 31 | 0  | 1 ANNA    | 16.5 | 55.8 | 45  | 1004 |
| 1969 | 7 | 31 | 6  | 1 ANNA    | 17.8 | 58.1 | 40  | 0    |
| 1969 | 7 | 31 | 12 | 1 ANNA    | 19.1 | 60.5 | 35  | 0    |
| 1969 | 7 | 31 | 18 | 1 ANNA    | 20.5 | 62.7 | 30  | 0    |
| 1969 | 8 | 1  | 0  | 1 ANNA    | 21.7 | 65.3 | 30  | 0    |
| 1969 | 8 | 1  | 6  | 1 ANNA    | 23.6 | 67.0 | 30  | 0    |
| 1969 | 8 | 1  | 12 | 1 ANNA    | 25.2 | 69.2 | 30  | 0    |
| 1969 | 8 | 1  | 18 | 1 ANNA    | 27.0 | 71.5 | 35  | 1008 |
| 1969 | 8 | 2  | 0  | 1 ANNA    | 28.7 | 73.2 | 30  | 1014 |
| 1969 | 8 | 2  | 6  | 1 ANNA    | 29.9 | 74.1 | 30  | 0    |
| 1969 | 8 | 2  | 12 | 1 ANNA    | 31.2 | 74.7 | 30  | 1013 |
| 1969 | 8 | 2  | 18 | 1 ANNA    | 32.6 | 74.5 | 30  | 1008 |
| 1969 | 8 | 3  | 0  | 1 ANNA    | 34.0 | 74.0 | 30  | 0    |
| 1969 | 8 | 3  | 6  | 1 ANNA    | 36.5 | 72.5 | 50  | 0    |
| 1969 | 8 | 3  | 12 | 1 ANNA    | 39.0 | 69.5 | 50  | 0    |
| 1969 | 8 | 3  | 18 | 1 ANNA    | 40.9 | 65.6 | 55  | 1002 |
| 1969 | 8 | 4  | 0  | 1 ANNA    | 41.5 | 61.8 | 50  | 0    |
| 1969 | 8 | 4  | 6  | 1 ANNA    | 42.0 | 57.5 | 45  | 0    |
| 1969 | 8 | 4  | 12 | 1 ANNA    | 42.5 | 53.0 | 45  | 0    |
| 1969 | 8 | 4  | 18 | 1 ANNA    | 43.0 | 47.0 | 45  | 0    |
| 1969 | 8 | 5  | 0  | 1 ANNA    | 43.5 | 42.0 | 45  | 0    |
| 1969 | 8 | 5  | 6  | 1 ANNA    | 44.5 | 37.0 | 35  | 0    |
| 1969 | 8 | 5  | 12 | 1 ANNA    | 45.5 | 32.0 | 35  | 0    |
| 1969 | 8 | 11 | 0  | 2 BLANCHE | 28.1 | 71.7 | 30  | 0    |
| 1969 | 8 | 11 | 6  | 2 BLANCHE | 30.2 | 71.6 | 30  | 0    |
| 1969 | 8 | 11 | 12 | 2 BLANCHE | 32.5 | 71.1 | 35  | 0    |
| 1969 | 8 | 11 | 18 | 2 BLANCHE | 35.5 | 69.9 | 75  | 997  |
| 1969 | 8 | 12 | 0  | 2 BLANCHE | 38.6 | 68.0 | 75  | 0    |
| 1969 | 8 | 12 | 6  | 2 BLANCHE | 41.7 | 65.0 | 75  | 0    |
| 1969 | 8 | 12 | 12 | 2 BLANCHE | 44.3 | 60.4 | 65  | 998  |
| 1969 | 8 | 12 | 18 | 2 BLANCHE | 46.0 | 54.9 | 60  | 0    |
| 1969 | 8 | 13 | 0  | 2 BLANCHE | 47.1 | 49.0 | 50  | 0    |
| 1969 | 8 | 13 | 6  | 2 BLANCHE | 48.0 | 43.0 | 40  | 0    |
| 1969 | 8 | 14 | 18 | 3 CAMILLE | 19.4 | 82.0 | 50  | 991  |
| 1969 | 8 | 15 | 0  | 3 CAMILLE | 19.7 | 82.7 | 55  | 0    |
| 1969 | 8 | 15 | 6  | 3 CAMILLE | 20.1 | 83.3 | 60  | 0    |
| 1969 | 8 | 15 | 12 | 3 CAMILLE | 20.7 | 83.8 | 85  | 970  |
| 1969 | 8 | 15 | 18 | 3 CAMILLE | 21.2 | 84.1 | 100 | 964  |
| 1969 | 8 | 16 | 0  | 3 CAMILLE | 22.3 | 84.4 | 90  | 0    |
| 1969 | 8 | 16 | 6  | 3 CAMILLE | 23.1 | 85.2 | 105 | 0    |
| 1969 | 8 | 16 | 12 | 3 CAMILLE | 23.7 | 85.9 | 120 | 0    |

|      |         |   |         |      |      |     |     |
|------|---------|---|---------|------|------|-----|-----|
| 1969 | 8 16 18 | 3 | CAMILLE | 24.2 | 86.5 | 130 | 908 |
| 1969 | 8 17 0  | 3 | CAMILLE | 25.2 | 87.2 | 140 | 905 |
| 1969 | 8 17 6  | 3 | CAMILLE | 26.0 | 87.7 | 155 | 0   |
| 1969 | 8 17 12 | 3 | CAMILLE | 27.0 | 88.2 | 160 | 0   |
| 1969 | 8 17 18 | 3 | CAMILLE | 28.3 | 88.7 | 165 | 0   |
| 1969 | 8 18 0  | 3 | CAMILLE | 29.4 | 89.1 | 165 | 909 |
| 1969 | 8 18 6  | 3 | CAMILLE | 30.7 | 89.6 | 100 | 0   |
| 1969 | 8 18 12 | 3 | CAMILLE | 32.2 | 90.0 | 65  | 0   |
| 1969 | 8 18 18 | 3 | CAMILLE | 33.4 | 90.1 | 50  | 0   |
| 1969 | 8 19 0  | 3 | CAMILLE | 34.7 | 90.0 | 30  | 0   |
| 1969 | 8 19 6  | 3 | CAMILLE | 36.0 | 89.3 | 30  | 0   |
| 1969 | 8 19 12 | 3 | CAMILLE | 37.0 | 88.0 | 30  | 0   |
| 1969 | 8 19 18 | 3 | CAMILLE | 37.7 | 86.0 | 25  | 0   |
| 1969 | 8 20 0  | 3 | CAMILLE | 38.0 | 84.8 | 25  | 0   |
| 1969 | 8 20 6  | 3 | CAMILLE | 37.4 | 80.2 | 25  | 0   |
| 1969 | 8 20 12 | 3 | CAMILLE | 37.3 | 77.0 | 25  | 0   |
| 1969 | 8 20 18 | 3 | CAMILLE | 37.0 | 75.1 | 30  | 0   |
| 1969 | 8 21 0  | 3 | CAMILLE | 36.6 | 73.4 | 40  | 0   |
| 1969 | 8 21 6  | 3 | CAMILLE | 36.7 | 70.9 | 45  | 0   |
| 1969 | 8 21 12 | 3 | CAMILLE | 37.3 | 68.4 | 50  | 0   |
| 1969 | 8 21 18 | 3 | CAMILLE | 38.0 | 64.9 | 55  | 0   |
| 1969 | 8 22 0  | 3 | CAMILLE | 39.2 | 61.4 | 60  | 0   |
| 1969 | 8 22 6  | 3 | CAMILLE | 40.8 | 58.2 | 55  | 0   |
| 1969 | 8 22 12 | 3 | CAMILLE | 43.0 | 54.0 | 50  | 0   |
| 1969 | 8 14 12 | 4 | DEBBIE  | 13.0 | 35.5 | 25  | 0   |
| 1969 | 8 14 18 | 4 | DEBBIE  | 13.3 | 37.0 | 25  | 0   |
| 1969 | 8 15 0  | 4 | DEBBIE  | 13.5 | 38.5 | 30  | 0   |
| 1969 | 8 15 6  | 4 | DEBBIE  | 13.8 | 40.0 | 30  | 0   |
| 1969 | 8 15 12 | 4 | DEBBIE  | 14.0 | 41.5 | 35  | 0   |
| 1969 | 8 15 18 | 4 | DEBBIE  | 14.3 | 43.0 | 40  | 0   |
| 1969 | 8 16 0  | 4 | DEBBIE  | 14.5 | 44.5 | 45  | 0   |
| 1969 | 8 16 6  | 4 | DEBBIE  | 14.7 | 45.7 | 50  | 0   |
| 1969 | 8 16 12 | 4 | DEBBIE  | 15.0 | 47.0 | 55  | 0   |
| 1969 | 8 16 18 | 4 | DEBBIE  | 15.5 | 48.0 | 65  | 0   |
| 1969 | 8 17 0  | 4 | DEBBIE  | 16.0 | 49.0 | 70  | 984 |
| 1969 | 8 17 6  | 4 | DEBBIE  | 16.5 | 50.0 | 75  | 980 |
| 1969 | 8 17 12 | 4 | DEBBIE  | 17.0 | 50.8 | 90  | 976 |
| 1969 | 8 17 18 | 4 | DEBBIE  | 17.7 | 51.7 | 90  | 971 |
| 1969 | 8 18 0  | 4 | DEBBIE  | 18.4 | 52.6 | 90  | 967 |
| 1969 | 8 18 6  | 4 | DEBBIE  | 19.1 | 53.4 | 100 | 968 |
| 1969 | 8 18 12 | 4 | DEBBIE  | 19.7 | 54.1 | 100 | 974 |
| 1969 | 8 18 18 | 4 | DEBBIE  | 20.4 | 54.7 | 90  | 972 |
| 1969 | 8 19 0  | 4 | DEBBIE  | 21.2 | 55.4 | 70  | 976 |
| 1969 | 8 19 6  | 4 | DEBBIE  | 21.8 | 56.7 | 80  | 978 |

|      |         |             |      |      |     |      |
|------|---------|-------------|------|------|-----|------|
| 1969 | 8 19 12 | 4 DEBBIE    | 22.4 | 57.8 | 80  | 974  |
| 1969 | 8 19 18 | 4 DEBBIE    | 23.2 | 59.3 | 95  | 966  |
| 1969 | 8 20 0  | 4 DEBBIE    | 23.8 | 60.5 | 100 | 956  |
| 1969 | 8 20 6  | 4 DEBBIE    | 24.5 | 62.3 | 85  | 953  |
| 1969 | 8 20 12 | 4 DEBBIE    | 25.1 | 63.3 | 105 | 953  |
| 1969 | 8 20 18 | 4 DEBBIE    | 25.8 | 64.2 | 100 | 951  |
| 1969 | 8 21 0  | 4 DEBBIE    | 26.6 | 64.9 | 100 | 959  |
| 1969 | 8 21 6  | 4 DEBBIE    | 27.4 | 65.1 | 95  | 960  |
| 1969 | 8 21 12 | 4 DEBBIE    | 28.4 | 64.8 | 95  | 959  |
| 1969 | 8 21 18 | 4 DEBBIE    | 29.4 | 64.0 | 100 | 959  |
| 1969 | 8 22 0  | 4 DEBBIE    | 30.3 | 62.1 | 100 | 959  |
| 1969 | 8 22 6  | 4 DEBBIE    | 31.3 | 61.4 | 100 | 0    |
| 1969 | 8 22 12 | 4 DEBBIE    | 32.6 | 60.0 | 100 | 964  |
| 1969 | 8 22 18 | 4 DEBBIE    | 34.0 | 58.6 | 100 | 0    |
| 1969 | 8 23 0  | 4 DEBBIE    | 35.4 | 57.2 | 100 | 965  |
| 1969 | 8 23 6  | 4 DEBBIE    | 36.7 | 56.7 | 100 | 0    |
| 1969 | 8 23 12 | 4 DEBBIE    | 39.2 | 54.8 | 95  | 0    |
| 1969 | 8 23 18 | 4 DEBBIE    | 41.6 | 53.2 | 90  | 0    |
| 1969 | 8 24 0  | 4 DEBBIE    | 43.5 | 52.9 | 90  | 0    |
| 1969 | 8 24 6  | 4 DEBBIE    | 45.5 | 52.8 | 80  | 0    |
| 1969 | 8 24 12 | 4 DEBBIE    | 48.0 | 52.0 | 70  | 0    |
| 1969 | 8 24 18 | 4 DEBBIE    | 50.5 | 50.5 | 65  | 0    |
| 1969 | 8 25 0  | 4 DEBBIE    | 53.0 | 48.0 | 65  | 0    |
| 1969 | 8 25 6  | 4 DEBBIE    | 56.5 | 43.5 | 55  | 0    |
| 1969 | 8 25 12 | 4 DEBBIE    | 60.9 | 37.8 | 55  | 0    |
| 1969 | 8 25 0  | 5 EVE       | 29.5 | 78.5 | 30  | 0    |
| 1969 | 8 25 6  | 5 EVE       | 29.6 | 77.8 | 30  | 0    |
| 1969 | 8 25 12 | 5 EVE       | 29.7 | 76.9 | 30  | 0    |
| 1969 | 8 25 18 | 5 EVE       | 29.8 | 76.0 | 40  | 0    |
| 1969 | 8 26 0  | 5 EVE       | 30.0 | 75.1 | 50  | 999  |
| 1969 | 8 26 6  | 5 EVE       | 30.3 | 74.3 | 45  | 0    |
| 1969 | 8 26 12 | 5 EVE       | 30.8 | 73.6 | 45  | 996  |
| 1969 | 8 26 18 | 5 EVE       | 31.4 | 72.7 | 40  | 997  |
| 1969 | 8 27 0  | 5 EVE       | 32.0 | 71.5 | 30  | 0    |
| 1969 | 8 27 6  | 5 EVE       | 32.5 | 70.0 | 30  | 0    |
| 1969 | 8 27 12 | 5 EVE       | 32.7 | 68.8 | 30  | 0    |
| 1969 | 8 27 18 | 5 EVE       | 32.8 | 67.5 | 25  | 1009 |
| 1969 | 8 29 0  | 6 FRANCELIA | 11.5 | 62.0 | 30  | 0    |
| 1969 | 8 29 6  | 6 FRANCELIA | 11.8 | 63.5 | 30  | 0    |
| 1969 | 8 29 12 | 6 FRANCELIA | 12.0 | 65.0 | 30  | 0    |
| 1969 | 8 29 18 | 6 FRANCELIA | 12.5 | 66.5 | 30  | 1005 |
| 1969 | 8 30 0  | 6 FRANCELIA | 13.2 | 69.2 | 30  | 0    |
| 1969 | 8 30 6  | 6 FRANCELIA | 13.7 | 70.7 | 30  | 0    |
| 1969 | 8 30 12 | 6 FRANCELIA | 14.3 | 72.2 | 40  | 0    |

|      |   |    |    |   |           |      |      |     |      |
|------|---|----|----|---|-----------|------|------|-----|------|
| 1969 | 8 | 30 | 18 | 6 | FRANCELIA | 14.9 | 74.3 | 50  | 1000 |
| 1969 | 8 | 31 | 0  | 6 | FRANCELIA | 15.3 | 75.8 | 55  | 0    |
| 1969 | 8 | 31 | 6  | 6 | FRANCELIA | 15.6 | 76.7 | 60  | 0    |
| 1969 | 8 | 31 | 12 | 6 | FRANCELIA | 16.0 | 77.6 | 60  | 0    |
| 1969 | 8 | 31 | 18 | 6 | FRANCELIA | 16.2 | 78.6 | 60  | 0    |
| 1969 | 9 | 1  | 0  | 6 | FRANCELIA | 16.4 | 79.4 | 55  | 1002 |
| 1969 | 9 | 1  | 6  | 6 | FRANCELIA | 16.8 | 80.6 | 55  | 0    |
| 1969 | 9 | 1  | 12 | 6 | FRANCELIA | 17.1 | 82.0 | 60  | 0    |
| 1969 | 9 | 1  | 18 | 6 | FRANCELIA | 17.3 | 83.2 | 65  | 995  |
| 1969 | 9 | 2  | 0  | 6 | FRANCELIA | 17.1 | 84.7 | 75  | 0    |
| 1969 | 9 | 2  | 6  | 6 | FRANCELIA | 16.8 | 85.5 | 80  | 990  |
| 1969 | 9 | 2  | 12 | 6 | FRANCELIA | 16.6 | 86.2 | 85  | 0    |
| 1969 | 9 | 2  | 18 | 6 | FRANCELIA | 16.4 | 86.7 | 100 | 973  |
| 1969 | 9 | 3  | 0  | 6 | FRANCELIA | 16.3 | 87.6 | 95  | 0    |
| 1969 | 9 | 3  | 6  | 6 | FRANCELIA | 16.3 | 87.9 | 85  | 0    |
| 1969 | 9 | 3  | 12 | 6 | FRANCELIA | 16.2 | 88.2 | 85  | 0    |
| 1969 | 9 | 3  | 18 | 6 | FRANCELIA | 16.2 | 88.6 | 85  | 0    |
| 1969 | 9 | 4  | 0  | 6 | FRANCELIA | 16.1 | 88.8 | 70  | 0    |
| 1969 | 9 | 4  | 6  | 6 | FRANCELIA | 16.1 | 89.2 | 60  | 0    |
| 1969 | 9 | 4  | 12 | 6 | FRANCELIA | 16.2 | 89.7 | 40  | 0    |
| 1969 | 9 | 6  | 0  | 7 | GERDA     | 24.5 | 77.0 | 25  | 1015 |
| 1969 | 9 | 6  | 6  | 7 | GERDA     | 25.4 | 78.0 | 25  | 0    |
| 1969 | 9 | 6  | 12 | 7 | GERDA     | 26.0 | 79.0 | 25  | 0    |
| 1969 | 9 | 6  | 18 | 7 | GERDA     | 26.4 | 79.6 | 25  | 1014 |
| 1969 | 9 | 7  | 0  | 7 | GERDA     | 26.6 | 80.2 | 25  | 1012 |
| 1969 | 9 | 7  | 6  | 7 | GERDA     | 27.3 | 81.1 | 25  | 0    |
| 1969 | 9 | 7  | 12 | 7 | GERDA     | 27.8 | 80.8 | 25  | 1010 |
| 1969 | 9 | 7  | 18 | 7 | GERDA     | 28.5 | 80.4 | 25  | 0    |
| 1969 | 9 | 8  | 0  | 7 | GERDA     | 29.0 | 80.0 | 30  | 1006 |
| 1969 | 9 | 8  | 6  | 7 | GERDA     | 29.7 | 79.7 | 35  | 0    |
| 1969 | 9 | 8  | 12 | 7 | GERDA     | 30.7 | 79.0 | 45  | 1002 |
| 1969 | 9 | 8  | 18 | 7 | GERDA     | 32.0 | 78.0 | 65  | 0    |
| 1969 | 9 | 9  | 0  | 7 | GERDA     | 33.4 | 76.4 | 70  | 991  |
| 1969 | 9 | 9  | 6  | 7 | GERDA     | 35.3 | 74.4 | 85  | 986  |
| 1969 | 9 | 9  | 12 | 7 | GERDA     | 37.8 | 72.2 | 110 | 984  |
| 1969 | 9 | 9  | 18 | 7 | GERDA     | 40.1 | 69.9 | 110 | 979  |
| 1969 | 9 | 10 | 0  | 7 | GERDA     | 44.0 | 67.5 | 95  | 979  |
| 1969 | 9 | 10 | 6  | 7 | GERDA     | 48.5 | 66.0 | 70  | 0    |
| 1969 | 9 | 10 | 12 | 7 | GERDA     | 53.0 | 65.0 | 40  | 0    |
| 1969 | 9 | 14 | 12 | 8 | HOLLY     | 11.9 | 47.4 | 25  | 0    |
| 1969 | 9 | 14 | 18 | 8 | HOLLY     | 12.3 | 48.1 | 30  | 1000 |
| 1969 | 9 | 15 | 0  | 8 | HOLLY     | 12.7 | 48.5 | 40  | 0    |
| 1969 | 9 | 15 | 6  | 8 | HOLLY     | 13.3 | 48.8 | 50  | 0    |
| 1969 | 9 | 15 | 12 | 8 | HOLLY     | 14.0 | 49.0 | 60  | 0    |

|      |         |         |      |      |    |      |
|------|---------|---------|------|------|----|------|
| 1969 | 9 15 18 | 8 HOLLY | 14.5 | 49.5 | 75 | 992  |
| 1969 | 9 16 0  | 8 HOLLY | 15.0 | 50.0 | 70 | 0    |
| 1969 | 9 16 6  | 8 HOLLY | 15.3 | 50.2 | 65 | 0    |
| 1969 | 9 16 12 | 8 HOLLY | 15.5 | 50.4 | 65 | 994  |
| 1969 | 9 16 18 | 8 HOLLY | 16.0 | 50.9 | 70 | 984  |
| 1969 | 9 17 0  | 8 HOLLY | 16.4 | 51.2 | 65 | 999  |
| 1969 | 9 17 6  | 8 HOLLY | 16.6 | 51.7 | 65 | 0    |
| 1969 | 9 17 12 | 8 HOLLY | 16.9 | 52.2 | 65 | 1000 |
| 1969 | 9 17 18 | 8 HOLLY | 17.0 | 53.1 | 65 | 1002 |
| 1969 | 9 18 0  | 8 HOLLY | 17.1 | 53.8 | 45 | 1004 |
| 1969 | 9 18 6  | 8 HOLLY | 17.0 | 54.3 | 45 | 0    |
| 1969 | 9 18 12 | 8 HOLLY | 16.9 | 55.2 | 40 | 0    |
| 1969 | 9 18 18 | 8 HOLLY | 16.8 | 55.3 | 35 | 0    |
| 1969 | 9 19 0  | 8 HOLLY | 16.7 | 55.5 | 30 | 0    |
| 1969 | 9 19 6  | 8 HOLLY | 16.4 | 58.7 | 30 | 0    |
| 1969 | 9 19 12 | 8 HOLLY | 16.2 | 60.0 | 30 | 0    |
| 1969 | 9 19 18 | 8 HOLLY | 15.9 | 61.0 | 25 | 0    |
| 1969 | 9 20 0  | 8 HOLLY | 15.8 | 62.0 | 25 | 0    |
| 1969 | 9 20 6  | 8 HOLLY | 15.5 | 63.0 | 25 | 0    |
| 1969 | 9 20 12 | 8 HOLLY | 15.3 | 64.0 | 25 | 0    |
| 1969 | 9 20 18 | 8 HOLLY | 15.0 | 65.0 | 25 | 0    |
| 1969 | 9 21 0  | 8 HOLLY | 14.8 | 65.9 | 25 | 0    |
| 1969 | 9 20 12 | 9 INGA  | 16.0 | 47.0 | 25 | 0    |
| 1969 | 9 20 18 | 9 INGA  | 16.3 | 48.0 | 25 | 0    |
| 1969 | 9 21 0  | 9 INGA  | 16.5 | 49.0 | 30 | 0    |
| 1969 | 9 21 6  | 9 INGA  | 16.7 | 50.2 | 35 | 0    |
| 1969 | 9 21 12 | 9 INGA  | 16.8 | 51.1 | 40 | 1001 |
| 1969 | 9 21 18 | 9 INGA  | 16.9 | 51.7 | 45 | 0    |
| 1969 | 9 22 0  | 9 INGA  | 17.0 | 52.3 | 45 | 0    |
| 1969 | 9 22 6  | 9 INGA  | 17.1 | 52.9 | 45 | 0    |
| 1969 | 9 22 12 | 9 INGA  | 17.2 | 53.5 | 50 | 1007 |
| 1969 | 9 22 18 | 9 INGA  | 17.3 | 54.1 | 50 | 0    |
| 1969 | 9 23 0  | 9 INGA  | 17.4 | 54.7 | 55 | 0    |
| 1969 | 9 23 6  | 9 INGA  | 17.6 | 55.4 | 50 | 0    |
| 1969 | 9 23 12 | 9 INGA  | 17.8 | 56.1 | 35 | 1006 |
| 1969 | 9 23 18 | 9 INGA  | 18.0 | 56.9 | 30 | 0    |
| 1969 | 9 24 0  | 9 INGA  | 18.2 | 57.8 | 30 | 0    |
| 1969 | 9 24 6  | 9 INGA  | 18.4 | 58.7 | 25 | 0    |
| 1969 | 9 24 12 | 9 INGA  | 18.6 | 59.6 | 25 | 1007 |
| 1969 | 9 24 18 | 9 INGA  | 18.8 | 60.3 | 25 | 0    |
| 1969 | 9 25 0  | 9 INGA  | 19.0 | 60.9 | 30 | 0    |
| 1969 | 9 25 6  | 9 INGA  | 19.3 | 61.5 | 30 | 0    |
| 1969 | 9 25 12 | 9 INGA  | 19.6 | 62.0 | 30 | 0    |
| 1969 | 9 25 18 | 9 INGA  | 20.0 | 62.3 | 25 | 0    |

|      |    |    |    |        |      |      |     |      |
|------|----|----|----|--------|------|------|-----|------|
| 1969 | 9  | 26 | 0  | 9 INGA | 20.4 | 62.5 | 25  | 0    |
| 1969 | 9  | 26 | 6  | 9 INGA | 20.8 | 62.8 | 25  | 0    |
| 1969 | 9  | 26 | 12 | 9 INGA | 21.2 | 63.0 | 25  | 0    |
| 1969 | 9  | 26 | 18 | 9 INGA | 21.6 | 63.2 | 25  | 0    |
| 1969 | 9  | 27 | 0  | 9 INGA | 21.9 | 63.3 | 25  | 0    |
| 1969 | 9  | 27 | 6  | 9 INGA | 22.2 | 63.5 | 25  | 0    |
| 1969 | 9  | 27 | 12 | 9 INGA | 22.5 | 63.6 | 25  | 0    |
| 1969 | 9  | 27 | 18 | 9 INGA | 22.8 | 63.7 | 25  | 0    |
| 1969 | 9  | 28 | 0  | 9 INGA | 23.0 | 63.8 | 25  | 0    |
| 1969 | 9  | 28 | 6  | 9 INGA | 23.2 | 63.9 | 25  | 0    |
| 1969 | 9  | 28 | 12 | 9 INGA | 23.5 | 64.0 | 30  | 1000 |
| 1969 | 9  | 28 | 18 | 9 INGA | 23.8 | 64.2 | 35  | 0    |
| 1969 | 9  | 29 | 0  | 9 INGA | 24.2 | 64.4 | 35  | 0    |
| 1969 | 9  | 29 | 6  | 9 INGA | 24.5 | 64.6 | 40  | 0    |
| 1969 | 9  | 29 | 12 | 9 INGA | 24.8 | 64.8 | 50  | 992  |
| 1969 | 9  | 29 | 18 | 9 INGA | 25.4 | 65.0 | 55  | 0    |
| 1969 | 9  | 30 | 0  | 9 INGA | 26.1 | 64.7 | 65  | 0    |
| 1969 | 9  | 30 | 6  | 9 INGA | 26.7 | 64.2 | 70  | 0    |
| 1969 | 9  | 30 | 12 | 9 INGA | 27.2 | 63.8 | 75  | 990  |
| 1969 | 9  | 30 | 18 | 9 INGA | 27.8 | 63.4 | 80  | 0    |
| 1969 | 10 | 1  | 0  | 9 INGA | 28.3 | 63.0 | 80  | 0    |
| 1969 | 10 | 1  | 6  | 9 INGA | 28.8 | 62.6 | 80  | 0    |
| 1969 | 10 | 1  | 12 | 9 INGA | 29.3 | 62.2 | 80  | 990  |
| 1969 | 10 | 1  | 18 | 9 INGA | 29.7 | 61.8 | 80  | 0    |
| 1969 | 10 | 2  | 0  | 9 INGA | 29.7 | 61.6 | 80  | 0    |
| 1969 | 10 | 2  | 6  | 9 INGA | 29.3 | 61.5 | 80  | 0    |
| 1969 | 10 | 2  | 12 | 9 INGA | 28.9 | 61.6 | 80  | 987  |
| 1969 | 10 | 2  | 18 | 9 INGA | 28.5 | 61.8 | 80  | 0    |
| 1969 | 10 | 3  | 0  | 9 INGA | 28.1 | 62.1 | 70  | 0    |
| 1969 | 10 | 3  | 6  | 9 INGA | 27.8 | 62.7 | 70  | 0    |
| 1969 | 10 | 3  | 12 | 9 INGA | 27.6 | 63.4 | 70  | 989  |
| 1969 | 10 | 3  | 18 | 9 INGA | 27.6 | 64.2 | 70  | 0    |
| 1969 | 10 | 4  | 0  | 9 INGA | 27.7 | 65.0 | 70  | 0    |
| 1969 | 10 | 4  | 6  | 9 INGA | 27.9 | 65.4 | 70  | 0    |
| 1969 | 10 | 4  | 12 | 9 INGA | 28.4 | 65.7 | 75  | 980  |
| 1969 | 10 | 4  | 18 | 9 INGA | 29.1 | 65.1 | 80  | 0    |
| 1969 | 10 | 5  | 0  | 9 INGA | 29.7 | 63.8 | 90  | 0    |
| 1969 | 10 | 5  | 6  | 9 INGA | 30.5 | 62.3 | 95  | 0    |
| 1969 | 10 | 5  | 12 | 9 INGA | 31.2 | 60.7 | 95  | 964  |
| 1969 | 10 | 5  | 18 | 9 INGA | 31.9 | 59.5 | 100 | 0    |
| 1969 | 10 | 6  | 0  | 9 INGA | 32.5 | 58.3 | 95  | 0    |
| 1969 | 10 | 6  | 6  | 9 INGA | 33.1 | 57.3 | 90  | 0    |
| 1969 | 10 | 6  | 12 | 9 INGA | 33.6 | 56.5 | 80  | 980  |
| 1969 | 10 | 6  | 18 | 9 INGA | 33.9 | 56.0 | 80  | 0    |

|                           |      |      |    |      |
|---------------------------|------|------|----|------|
| 1969 10 7 0 9 INGA        | 34.1 | 55.5 | 80 | 0    |
| 1969 10 7 6 9 INGA        | 34.3 | 55.0 | 80 | 0    |
| 1969 10 7 12 9 INGA       | 34.4 | 54.5 | 85 | 981  |
| 1969 10 7 18 9 INGA       | 34.5 | 54.0 | 85 | 0    |
| 1969 10 8 0 9 INGA        | 34.5 | 53.6 | 85 | 0    |
| 1969 10 8 6 9 INGA        | 34.4 | 53.2 | 70 | 0    |
| 1969 10 8 12 9 INGA       | 34.3 | 52.8 | 65 | 988  |
| 1969 10 8 18 9 INGA       | 34.1 | 52.4 | 75 | 0    |
| 1969 10 9 0 9 INGA        | 33.9 | 52.0 | 75 | 0    |
| 1969 10 9 6 9 INGA        | 33.3 | 51.7 | 75 | 0    |
| 1969 10 9 12 9 INGA       | 32.7 | 51.5 | 75 | 985  |
| 1969 10 9 18 9 INGA       | 32.2 | 51.4 | 75 | 0    |
| 1969 10 10 0 9 INGA       | 31.7 | 51.3 | 70 | 0    |
| 1969 10 10 6 9 INGA       | 31.2 | 51.2 | 70 | 0    |
| 1969 10 10 12 9 INGA      | 30.6 | 51.1 | 60 | 993  |
| 1969 10 10 18 9 INGA      | 30.0 | 51.0 | 60 | 0    |
| 1969 10 11 0 9 INGA       | 29.3 | 51.4 | 60 | 0    |
| 1969 10 11 6 9 INGA       | 28.7 | 51.9 | 55 | 0    |
| 1969 10 11 12 9 INGA      | 28.2 | 52.5 | 50 | 998  |
| 1969 10 11 18 9 INGA      | 27.7 | 53.1 | 40 | 0    |
| 1969 10 12 0 9 INGA       | 27.2 | 53.9 | 40 | 0    |
| 1969 10 12 6 9 INGA       | 26.8 | 54.7 | 40 | 0    |
| 1969 10 12 12 9 INGA      | 26.4 | 55.5 | 35 | 1001 |
| 1969 10 12 18 9 INGA      | 26.2 | 56.3 | 35 | 0    |
| 1969 10 13 0 9 INGA       | 26.0 | 57.1 | 35 | 0    |
| 1969 10 13 6 9 INGA       | 25.9 | 57.9 | 30 | 0    |
| 1969 10 13 12 9 INGA      | 25.8 | 58.8 | 30 | 1003 |
| 1969 10 13 18 9 INGA      | 25.8 | 59.6 | 30 | 0    |
| 1969 10 14 0 9 INGA       | 25.8 | 60.2 | 30 | 0    |
| 1969 10 14 6 9 INGA       | 25.8 | 60.7 | 30 | 0    |
| 1969 10 14 12 9 INGA      | 25.9 | 61.0 | 25 | 1008 |
| 1969 10 14 18 9 INGA      | 26.0 | 61.3 | 25 | 0    |
| 1969 10 15 0 9 INGA       | 26.1 | 61.6 | 25 | 0    |
| 1969 9 21 12 10 NOT NAMED | 34.0 | 71.0 | 30 | 1010 |
| 1969 9 21 18 10 NOT NAMED | 34.1 | 70.5 | 35 | 0    |
| 1969 9 22 0 10 NOT NAMED  | 34.2 | 70.0 | 40 | 1007 |
| 1969 9 22 6 10 NOT NAMED  | 34.3 | 69.5 | 45 | 0    |
| 1969 9 22 12 10 NOT NAMED | 34.5 | 69.0 | 45 | 1002 |
| 1969 9 22 18 10 NOT NAMED | 34.7 | 68.5 | 50 | 0    |
| 1969 9 23 0 10 NOT NAMED  | 35.0 | 68.0 | 50 | 995  |
| 1969 9 23 6 10 NOT NAMED  | 35.2 | 67.5 | 50 | 0    |
| 1969 9 23 12 10 NOT NAMED | 35.5 | 67.0 | 55 | 992  |
| 1969 9 23 18 10 NOT NAMED | 35.9 | 66.8 | 55 | 0    |
| 1969 9 24 0 10 NOT NAMED  | 36.3 | 66.5 | 60 | 990  |

|      |    |    |    |    |           |      |      |    |      |
|------|----|----|----|----|-----------|------|------|----|------|
| 1969 | 9  | 24 | 6  | 10 | NOT NAMED | 36.7 | 66.3 | 60 | 0    |
| 1969 | 9  | 24 | 12 | 10 | NOT NAMED | 37.0 | 66.0 | 65 | 987  |
| 1969 | 9  | 24 | 18 | 10 | NOT NAMED | 37.5 | 65.7 | 65 | 0    |
| 1969 | 9  | 25 | 0  | 10 | NOT NAMED | 38.5 | 65.0 | 65 | 985  |
| 1969 | 9  | 25 | 6  | 10 | NOT NAMED | 40.2 | 62.8 | 65 | 0    |
| 1969 | 9  | 25 | 12 | 10 | NOT NAMED | 42.0 | 60.0 | 65 | 985  |
| 1969 | 9  | 25 | 18 | 10 | NOT NAMED | 43.4 | 57.9 | 65 | 0    |
| 1969 | 9  | 26 | 0  | 10 | NOT NAMED | 44.5 | 56.0 | 65 | 0    |
| 1969 | 9  | 24 | 12 | 11 | NOT NAMED | 36.5 | 35.0 | 30 | 1005 |
| 1969 | 9  | 24 | 18 | 11 | NOT NAMED | 35.5 | 35.7 | 30 | 0    |
| 1969 | 9  | 25 | 0  | 11 | NOT NAMED | 35.0 | 36.5 | 30 | 0    |
| 1969 | 9  | 25 | 6  | 11 | NOT NAMED | 35.0 | 37.6 | 30 | 0    |
| 1969 | 9  | 25 | 12 | 11 | NOT NAMED | 35.0 | 38.5 | 35 | 1003 |
| 1969 | 9  | 25 | 18 | 11 | NOT NAMED | 35.1 | 38.9 | 40 | 0    |
| 1969 | 9  | 26 | 0  | 11 | NOT NAMED | 35.2 | 39.2 | 45 | 0    |
| 1969 | 9  | 26 | 6  | 11 | NOT NAMED | 35.3 | 39.6 | 50 | 0    |
| 1969 | 9  | 26 | 12 | 11 | NOT NAMED | 35.5 | 40.0 | 50 | 997  |
| 1969 | 9  | 26 | 18 | 11 | NOT NAMED | 36.0 | 40.0 | 50 | 0    |
| 1969 | 9  | 27 | 0  | 11 | NOT NAMED | 36.5 | 39.5 | 55 | 0    |
| 1969 | 9  | 27 | 6  | 11 | NOT NAMED | 37.0 | 38.7 | 60 | 0    |
| 1969 | 9  | 27 | 12 | 11 | NOT NAMED | 37.5 | 38.0 | 60 | 990  |
| 1969 | 9  | 27 | 18 | 11 | NOT NAMED | 38.2 | 37.5 | 60 | 0    |
| 1969 | 9  | 28 | 0  | 11 | NOT NAMED | 39.0 | 37.2 | 60 | 0    |
| 1969 | 9  | 28 | 6  | 11 | NOT NAMED | 40.0 | 37.0 | 60 | 0    |
| 1969 | 9  | 28 | 12 | 11 | NOT NAMED | 41.0 | 37.0 | 60 | 990  |
| 1969 | 9  | 28 | 18 | 11 | NOT NAMED | 41.6 | 37.3 | 60 | 0    |
| 1969 | 9  | 29 | 0  | 11 | NOT NAMED | 42.2 | 38.0 | 60 | 0    |
| 1969 | 9  | 29 | 6  | 11 | NOT NAMED | 42.8 | 39.5 | 60 | 0    |
| 1969 | 9  | 29 | 12 | 11 | NOT NAMED | 43.5 | 41.0 | 60 | 990  |
| 1969 | 9  | 29 | 18 | 11 | NOT NAMED | 44.8 | 41.4 | 55 | 0    |
| 1969 | 9  | 30 | 0  | 11 | NOT NAMED | 47.0 | 41.0 | 50 | 0    |
| 1969 | 9  | 29 | 12 | 12 | SUBTROP 1 | 23.5 | 85.5 | 30 | 1005 |
| 1969 | 9  | 29 | 18 | 12 | SUBTROP 1 | 24.0 | 85.7 | 45 | 1002 |
| 1969 | 9  | 30 | 0  | 12 | SUBTROP 1 | 24.5 | 86.0 | 50 | 1001 |
| 1969 | 9  | 30 | 6  | 12 | SUBTROP 1 | 25.0 | 86.3 | 50 | 0    |
| 1969 | 9  | 30 | 12 | 12 | SUBTROP 1 | 25.5 | 86.5 | 50 | 1000 |
| 1969 | 9  | 30 | 18 | 12 | SUBTROP 1 | 26.5 | 86.5 | 50 | 0    |
| 1969 | 10 | 1  | 0  | 12 | SUBTROP 1 | 27.5 | 86.6 | 50 | 998  |
| 1969 | 10 | 1  | 6  | 12 | SUBTROP 1 | 28.5 | 86.6 | 40 | 0    |
| 1969 | 10 | 1  | 12 | 12 | SUBTROP 1 | 29.5 | 86.5 | 30 | 996  |
| 1969 | 10 | 1  | 18 | 12 | SUBTROP 1 | 31.0 | 86.5 | 25 | 999  |
| 1969 | 10 | 1  | 12 | 13 | JENNY     | 19.0 | 83.7 | 25 | 0    |
| 1969 | 10 | 1  | 18 | 13 | JENNY     | 20.3 | 83.2 | 25 | 0    |
| 1969 | 10 | 2  | 0  | 13 | JENNY     | 21.8 | 82.8 | 25 | 0    |



|         |    |       |       |      |      |    |      |
|---------|----|-------|-------|------|------|----|------|
| 1969 10 | 2  | 6 13  | JENNY | 23.0 | 82.4 | 25 | 0    |
| 1969 10 | 2  | 12 13 | JENNY | 24.3 | 82.3 | 30 | 0    |
| 1969 10 | 2  | 18 13 | JENNY | 25.5 | 82.1 | 40 | 1000 |
| 1969 10 | 3  | 0 13  | JENNY | 26.4 | 81.8 | 35 | 0    |
| 1969 10 | 3  | 6 13  | JENNY | 27.4 | 81.2 | 30 | 0    |
| 1969 10 | 3  | 12 13 | JENNY | 28.5 | 80.7 | 30 | 0    |
| 1969 10 | 3  | 18 13 | JENNY | 28.8 | 80.7 | 30 | 0    |
| 1969 10 | 4  | 0 13  | JENNY | 29.0 | 80.9 | 25 | 0    |
| 1969 10 | 4  | 6 13  | JENNY | 29.1 | 81.2 | 25 | 0    |
| 1969 10 | 4  | 12 13 | JENNY | 29.0 | 81.4 | 25 | 0    |
| 1969 10 | 4  | 18 13 | JENNY | 28.7 | 81.7 | 25 | 0    |
| 1969 10 | 5  | 0 13  | JENNY | 28.0 | 82.8 | 25 | 0    |
| 1969 10 | 5  | 6 13  | JENNY | 27.6 | 84.3 | 25 | 0    |
| 1969 10 | 5  | 12 13 | JENNY | 27.5 | 85.8 | 25 | 0    |
| 1969 10 | 5  | 18 13 | JENNY | 27.5 | 87.2 | 25 | 0    |
| 1969 10 | 6  | 0 13  | JENNY | 27.5 | 88.6 | 25 | 0    |
| 1969 10 | 6  | 6 13  | JENNY | 27.5 | 90.0 | 25 | 0    |
| 1969 10 | 6  | 12 13 | JENNY | 27.5 | 91.4 | 25 | 0    |
| 1969 10 | 6  | 18 13 | JENNY | 27.5 | 92.8 | 25 | 0    |
| 1969 10 | 7  | 12 14 | KARA  | 20.5 | 68.0 | 25 | 0    |
| 1969 10 | 7  | 18 14 | KARA  | 20.7 | 69.2 | 25 | 0    |
| 1969 10 | 8  | 0 14  | KARA  | 20.9 | 70.0 | 25 | 0    |
| 1969 10 | 8  | 6 14  | KARA  | 21.1 | 70.8 | 25 | 0    |
| 1969 10 | 8  | 12 14 | KARA  | 21.3 | 72.0 | 30 | 0    |
| 1969 10 | 8  | 18 14 | KARA  | 22.5 | 73.2 | 30 | 0    |
| 1969 10 | 9  | 0 14  | KARA  | 23.5 | 73.6 | 30 | 0    |
| 1969 10 | 9  | 6 14  | KARA  | 24.7 | 73.7 | 30 | 0    |
| 1969 10 | 9  | 12 14 | KARA  | 25.7 | 73.6 | 30 | 1006 |
| 1969 10 | 9  | 18 14 | KARA  | 27.2 | 73.3 | 35 | 0    |
| 1969 10 | 10 | 0 14  | KARA  | 27.9 | 72.8 | 40 | 0    |
| 1969 10 | 10 | 6 14  | KARA  | 28.4 | 72.4 | 45 | 0    |
| 1969 10 | 10 | 12 14 | KARA  | 28.7 | 72.1 | 40 | 1001 |
| 1969 10 | 10 | 18 14 | KARA  | 29.5 | 71.3 | 40 | 0    |
| 1969 10 | 11 | 0 14  | KARA  | 29.9 | 70.5 | 35 | 999  |
| 1969 10 | 11 | 6 14  | KARA  | 30.7 | 69.8 | 35 | 0    |
| 1969 10 | 11 | 12 14 | KARA  | 32.4 | 69.8 | 35 | 0    |
| 1969 10 | 11 | 18 14 | KARA  | 34.0 | 70.2 | 35 | 1001 |
| 1969 10 | 12 | 0 14  | KARA  | 34.5 | 70.6 | 40 | 0    |
| 1969 10 | 12 | 6 14  | KARA  | 34.8 | 70.7 | 45 | 997  |
| 1969 10 | 12 | 12 14 | KARA  | 34.9 | 71.9 | 50 | 0    |
| 1969 10 | 12 | 18 14 | KARA  | 34.2 | 71.4 | 55 | 0    |
| 1969 10 | 13 | 0 14  | KARA  | 33.6 | 71.5 | 55 | 0    |
| 1969 10 | 13 | 6 14  | KARA  | 33.3 | 71.4 | 55 | 0    |
| 1969 10 | 13 | 12 14 | KARA  | 32.7 | 72.8 | 55 | 0    |

|                         |      |      |    |      |
|-------------------------|------|------|----|------|
| 1969 10 13 18 14 KARA   | 31.9 | 73.8 | 60 | 0    |
| 1969 10 14 0 14 KARA    | 31.0 | 74.7 | 60 | 0    |
| 1969 10 14 6 14 KARA    | 31.4 | 75.0 | 60 | 0    |
| 1969 10 14 12 14 KARA   | 32.0 | 75.7 | 60 | 990  |
| 1969 10 14 18 14 KARA   | 31.3 | 76.3 | 60 | 0    |
| 1969 10 15 0 14 KARA    | 31.4 | 75.4 | 60 | 988  |
| 1969 10 15 6 14 KARA    | 32.2 | 74.5 | 65 | 0    |
| 1969 10 15 12 14 KARA   | 32.7 | 73.5 | 65 | 984  |
| 1969 10 15 18 14 KARA   | 33.3 | 72.4 | 65 | 0    |
| 1969 10 16 0 14 KARA    | 33.7 | 71.2 | 65 | 0    |
| 1969 10 16 6 14 KARA    | 34.3 | 70.0 | 65 | 0    |
| 1969 10 16 12 14 KARA   | 34.8 | 68.8 | 70 | 994  |
| 1969 10 16 18 14 KARA   | 35.7 | 67.2 | 75 | 990  |
| 1969 10 17 0 14 KARA    | 36.9 | 64.8 | 75 | 0    |
| 1969 10 17 6 14 KARA    | 38.2 | 62.7 | 75 | 0    |
| 1969 10 17 12 14 KARA   | 39.6 | 60.2 | 80 | 985  |
| 1969 10 17 18 14 KARA   | 41.1 | 56.3 | 85 | 978  |
| 1969 10 18 0 14 KARA    | 43.3 | 50.8 | 90 | 0    |
| 1969 10 18 6 14 KARA    | 45.2 | 45.3 | 80 | 980  |
| 1969 10 18 12 14 KARA   | 46.1 | 40.0 | 65 | 0    |
| 1969 10 18 18 14 KARA   | 46.2 | 35.1 | 60 | 0    |
| 1969 10 19 0 14 KARA    | 46.0 | 30.3 | 55 | 0    |
| 1969 10 19 6 14 KARA    | 45.8 | 28.0 | 45 | 0    |
| 1969 10 17 0 15 LAURIE  | 17.3 | 85.1 | 25 | 1007 |
| 1969 10 17 6 15 LAURIE  | 17.6 | 85.4 | 25 | 0    |
| 1969 10 17 12 15 LAURIE | 17.9 | 85.7 | 25 | 0    |
| 1969 10 17 18 15 LAURIE | 18.1 | 85.9 | 25 | 0    |
| 1969 10 18 0 15 LAURIE  | 18.3 | 86.1 | 25 | 0    |
| 1969 10 18 6 15 LAURIE  | 18.7 | 86.5 | 25 | 0    |
| 1969 10 18 12 15 LAURIE | 19.1 | 86.9 | 25 | 0    |
| 1969 10 18 18 15 LAURIE | 19.7 | 87.6 | 30 | 0    |
| 1969 10 19 0 15 LAURIE  | 20.4 | 88.3 | 30 | 1005 |
| 1969 10 19 6 15 LAURIE  | 21.0 | 89.0 | 30 | 0    |
| 1969 10 19 12 15 LAURIE | 21.5 | 89.5 | 45 | 1000 |
| 1969 10 19 18 15 LAURIE | 22.4 | 90.2 | 45 | 0    |
| 1969 10 20 0 15 LAURIE  | 23.3 | 90.8 | 50 | 0    |
| 1969 10 20 6 15 LAURIE  | 23.8 | 90.9 | 55 | 0    |
| 1969 10 20 12 15 LAURIE | 24.3 | 91.0 | 65 | 993  |
| 1969 10 20 18 15 LAURIE | 24.9 | 91.1 | 70 | 0    |
| 1969 10 21 0 15 LAURIE  | 25.8 | 91.0 | 70 | 973  |
| 1969 10 21 6 15 LAURIE  | 26.2 | 90.4 | 75 | 0    |
| 1969 10 21 12 15 LAURIE | 26.3 | 89.6 | 90 | 973  |
| 1969 10 21 18 15 LAURIE | 26.3 | 88.9 | 90 | 0    |
| 1969 10 22 0 15 LAURIE  | 26.2 | 88.3 | 85 | 980  |

|            |         |           |      |      |    |      |
|------------|---------|-----------|------|------|----|------|
| 1969 10 22 | 6 15    | LAURIE    | 26.0 | 87.5 | 80 | 0    |
| 1969 10 22 | 12 15   | LAURIE    | 25.4 | 86.8 | 75 | 987  |
| 1969 10 22 | 18 15   | LAURIE    | 25.1 | 86.5 | 70 | 0    |
| 1969 10 23 | 0 15    | LAURIE    | 24.7 | 86.2 | 65 | 992  |
| 1969 10 23 | 6 15    | LAURIE    | 24.4 | 86.1 | 60 | 0    |
| 1969 10 23 | 12 15   | LAURIE    | 24.1 | 86.2 | 45 | 0    |
| 1969 10 23 | 18 15   | LAURIE    | 23.8 | 86.8 | 40 | 0    |
| 1969 10 24 | 0 15    | LAURIE    | 23.6 | 87.5 | 35 | 0    |
| 1969 10 24 | 6 15    | LAURIE    | 23.5 | 88.0 | 35 | 0    |
| 1969 10 24 | 12 15   | LAURIE    | 23.4 | 88.6 | 35 | 1001 |
| 1969 10 24 | 18 15   | LAURIE    | 23.2 | 89.5 | 30 | 0    |
| 1969 10 25 | 0 15    | LAURIE    | 23.1 | 90.4 | 30 | 0    |
| 1969 10 25 | 6 15    | LAURIE    | 22.9 | 91.1 | 30 | 0    |
| 1969 10 25 | 12 15   | LAURIE    | 22.4 | 91.7 | 25 | 1007 |
| 1969 10 25 | 18 15   | LAURIE    | 22.0 | 92.2 | 25 | 0    |
| 1969 10 26 | 0 15    | LAURIE    | 21.4 | 92.6 | 30 | 0    |
| 1969 10 26 | 6 15    | LAURIE    | 20.8 | 92.9 | 30 | 0    |
| 1969 10 26 | 12 15   | LAURIE    | 20.1 | 93.0 | 30 | 0    |
| 1969 10 26 | 18 15   | LAURIE    | 19.4 | 93.0 | 30 | 1006 |
| 1969 10 27 | 0 15    | LAURIE    | 18.7 | 93.1 | 25 | 0    |
| 1969 10 27 | 6 15    | LAURIE    | 18.0 | 93.1 | 20 | 0    |
| 1969 10 28 | 12 16   | NOT NAMED | 30.5 | 42.5 | 25 | 1014 |
| 1969 10 28 | 18 16   | NOT NAMED | 31.3 | 43.6 | 30 | 0    |
| 1969 10 29 | 0 16    | NOT NAMED | 32.0 | 44.5 | 35 | 1007 |
| 1969 10 29 | 6 16    | NOT NAMED | 32.8 | 45.3 | 45 | 0    |
| 1969 10 29 | 12 16   | NOT NAMED | 33.5 | 46.0 | 50 | 995  |
| 1969 10 29 | 18 16   | NOT NAMED | 34.0 | 46.6 | 55 | 0    |
| 1969 10 30 | 0 16    | NOT NAMED | 34.5 | 47.0 | 55 | 993  |
| 1969 10 30 | 6 16    | NOT NAMED | 35.3 | 46.8 | 60 | 0    |
| 1969 10 30 | 12 16   | NOT NAMED | 36.0 | 46.0 | 60 | 990  |
| 1969 10 30 | 18 16   | NOT NAMED | 36.8 | 44.7 | 60 | 0    |
| 1969 10 31 | 0 16    | NOT NAMED | 37.5 | 43.0 | 60 | 990  |
| 1969 10 31 | 6 16    | NOT NAMED | 37.9 | 40.9 | 55 | 0    |
| 1969 10 31 | 12 16   | NOT NAMED | 38.0 | 38.5 | 50 | 995  |
| 1969 10 31 | 18 16   | NOT NAMED | 38.0 | 35.0 | 45 | 0    |
| 1969 10 30 | 12 17   | NOT NAMED | 42.5 | 57.0 | 50 | 0    |
| 1969 10 30 | 18 17   | NOT NAMED | 41.8 | 56.3 | 50 | 0    |
| 1969 10 31 | 0 17    | NOT NAMED | 41.0 | 55.5 | 50 | 992  |
| 1969 10 31 | 6 17    | NOT NAMED | 40.3 | 54.8 | 50 | 0    |
| 1969 10 31 | 12 17   | NOT NAMED | 39.5 | 54.0 | 55 | 988  |
| 1969 10 31 | 18 17   | NOT NAMED | 39.0 | 53.0 | 55 | 0    |
| 1969 11    | 1 0 17  | NOT NAMED | 38.5 | 52.0 | 60 | 0    |
| 1969 11    | 1 6 17  | NOT NAMED | 38.0 | 51.0 | 60 | 0    |
| 1969 11    | 1 12 17 | NOT NAMED | 37.5 | 50.0 | 60 | 992  |

|         |          |           |      |      |    |      |
|---------|----------|-----------|------|------|----|------|
| 1969 11 | 1 18 17  | NOT NAMED | 35.6 | 49.2 | 60 | 0    |
| 1969 11 | 2 0 17   | NOT NAMED | 33.5 | 48.5 | 55 | 0    |
| 1969 11 | 2 6 17   | NOT NAMED | 32.5 | 48.0 | 50 | 0    |
| 1969 11 | 2 12 17  | NOT NAMED | 31.5 | 47.5 | 50 | 998  |
| 1969 11 | 2 18 17  | NOT NAMED | 30.5 | 46.6 | 50 | 0    |
| 1969 11 | 3 0 17   | NOT NAMED | 29.5 | 45.5 | 55 | 0    |
| 1969 11 | 3 6 17   | NOT NAMED | 28.3 | 44.3 | 60 | 0    |
| 1969 11 | 3 12 17  | NOT NAMED | 27.0 | 43.0 | 60 | 995  |
| 1969 11 | 3 18 17  | NOT NAMED | 26.4 | 41.4 | 60 | 0    |
| 1969 11 | 4 0 17   | NOT NAMED | 26.5 | 40.0 | 60 | 0    |
| 1969 11 | 4 6 17   | NOT NAMED | 27.1 | 39.0 | 60 | 0    |
| 1969 11 | 4 12 17  | NOT NAMED | 28.0 | 38.0 | 65 | 992  |
| 1969 11 | 4 18 17  | NOT NAMED | 29.2 | 37.0 | 65 | 0    |
| 1969 11 | 5 0 17   | NOT NAMED | 30.3 | 36.0 | 65 | 0    |
| 1969 11 | 5 6 17   | NOT NAMED | 31.4 | 35.0 | 65 | 0    |
| 1969 11 | 5 12 17  | NOT NAMED | 32.5 | 34.0 | 60 | 0    |
| 1969 11 | 5 18 17  | NOT NAMED | 33.8 | 33.0 | 60 | 0    |
| 1969 11 | 6 0 17   | NOT NAMED | 35.0 | 32.0 | 60 | 0    |
| 1969 11 | 6 6 17   | NOT NAMED | 36.3 | 30.7 | 55 | 0    |
| 1969 11 | 6 12 17  | NOT NAMED | 37.5 | 29.0 | 50 | 0    |
| 1969 11 | 6 18 17  | NOT NAMED | 38.8 | 27.1 | 50 | 0    |
| 1969 11 | 7 0 17   | NOT NAMED | 40.0 | 25.0 | 45 | 0    |
| 1969 11 | 21 12 18 | MARTHA    | 10.3 | 81.0 | 45 | 0    |
| 1969 11 | 21 18 18 | MARTHA    | 10.3 | 81.0 | 55 | 0    |
| 1969 11 | 22 0 18  | MARTHA    | 10.3 | 81.0 | 65 | 0    |
| 1969 11 | 22 6 18  | MARTHA    | 10.3 | 81.0 | 70 | 0    |
| 1969 11 | 22 12 18 | MARTHA    | 10.3 | 81.0 | 80 | 979  |
| 1969 11 | 22 18 18 | MARTHA    | 10.2 | 81.0 | 75 | 0    |
| 1969 11 | 23 0 18  | MARTHA    | 10.1 | 81.0 | 70 | 986  |
| 1969 11 | 23 6 18  | MARTHA    | 10.0 | 81.0 | 65 | 0    |
| 1969 11 | 23 12 18 | MARTHA    | 9.8  | 81.0 | 60 | 999  |
| 1969 11 | 23 18 18 | MARTHA    | 9.6  | 81.0 | 60 | 0    |
| 1969 11 | 24 0 18  | MARTHA    | 9.4  | 81.0 | 60 | 1000 |
| 1969 11 | 24 6 18  | MARTHA    | 9.2  | 81.0 | 60 | 0    |
| 1969 11 | 24 12 18 | MARTHA    | 9.0  | 81.0 | 60 | 1000 |
| 1969 11 | 24 18 18 | MARTHA    | 8.8  | 81.1 | 40 | 0    |
| 1969 11 | 25 0 18  | MARTHA    | 8.7  | 81.3 | 30 | 0    |
| 1969 11 | 25 6 18  | MARTHA    | 8.6  | 81.6 | 30 | 0    |
| 1969 11 | 25 12 18 | MARTHA    | 8.5  | 82.0 | 25 | 0    |
| 1970    | 5 17 18  | 1 ALMA    | 11.5 | 79.0 | 25 | 0    |
| 1970    | 5 18 0   | 1 ALMA    | 11.7 | 79.2 | 25 | 0    |
| 1970    | 5 18 6   | 1 ALMA    | 12.1 | 79.7 | 25 | 0    |
| 1970    | 5 18 12  | 1 ALMA    | 12.3 | 80.1 | 25 | 1007 |
| 1970    | 5 18 18  | 1 ALMA    | 12.5 | 80.5 | 25 | 0    |

|      |      |    |   |       |      |      |    |      |
|------|------|----|---|-------|------|------|----|------|
| 1970 | 5 19 | 0  | 1 | ALMA  | 13.0 | 81.0 | 25 | 0    |
| 1970 | 5 19 | 6  | 1 | ALMA  | 13.5 | 81.5 | 25 | 0    |
| 1970 | 5 19 | 12 | 1 | ALMA  | 14.0 | 82.0 | 25 | 1005 |
| 1970 | 5 19 | 18 | 1 | ALMA  | 14.5 | 82.5 | 25 | 0    |
| 1970 | 5 20 | 0  | 1 | ALMA  | 15.5 | 82.5 | 35 | 0    |
| 1970 | 5 20 | 6  | 1 | ALMA  | 16.2 | 82.3 | 35 | 0    |
| 1970 | 5 20 | 12 | 1 | ALMA  | 16.8 | 81.9 | 65 | 0    |
| 1970 | 5 20 | 18 | 1 | ALMA  | 17.2 | 81.6 | 70 | 993  |
| 1970 | 5 21 | 0  | 1 | ALMA  | 18.0 | 81.0 | 55 | 0    |
| 1970 | 5 21 | 6  | 1 | ALMA  | 18.2 | 80.3 | 50 | 0    |
| 1970 | 5 21 | 12 | 1 | ALMA  | 18.5 | 80.2 | 45 | 0    |
| 1970 | 5 21 | 18 | 1 | ALMA  | 19.0 | 80.0 | 40 | 998  |
| 1970 | 5 22 | 0  | 1 | ALMA  | 19.6 | 80.1 | 35 | 1004 |
| 1970 | 5 22 | 6  | 1 | ALMA  | 19.3 | 80.6 | 30 | 0    |
| 1970 | 5 22 | 12 | 1 | ALMA  | 19.1 | 81.1 | 30 | 0    |
| 1970 | 5 22 | 18 | 1 | ALMA  | 19.0 | 81.8 | 30 | 1007 |
| 1970 | 5 23 | 0  | 1 | ALMA  | 19.2 | 82.7 | 30 | 0    |
| 1970 | 5 23 | 6  | 1 | ALMA  | 19.8 | 83.5 | 25 | 0    |
| 1970 | 5 23 | 12 | 1 | ALMA  | 21.0 | 83.9 | 25 | 0    |
| 1970 | 5 23 | 18 | 1 | ALMA  | 21.9 | 84.0 | 25 | 0    |
| 1970 | 5 24 | 0  | 1 | ALMA  | 23.0 | 84.0 | 25 | 0    |
| 1970 | 5 24 | 6  | 1 | ALMA  | 24.0 | 84.0 | 25 | 0    |
| 1970 | 5 24 | 12 | 1 | ALMA  | 25.2 | 84.0 | 25 | 1008 |
| 1970 | 5 24 | 18 | 1 | ALMA  | 26.8 | 83.9 | 25 | 0    |
| 1970 | 5 25 | 0  | 1 | ALMA  | 28.3 | 83.6 | 25 | 0    |
| 1970 | 5 25 | 6  | 1 | ALMA  | 29.5 | 82.9 | 25 | 0    |
| 1970 | 5 25 | 12 | 1 | ALMA  | 30.6 | 82.2 | 25 | 0    |
| 1970 | 5 25 | 18 | 1 | ALMA  | 31.8 | 81.6 | 25 | 0    |
| 1970 | 5 26 | 0  | 1 | ALMA  | 32.6 | 81.2 | 25 | 1005 |
| 1970 | 5 26 | 6  | 1 | ALMA  | 33.3 | 80.7 | 25 | 0    |
| 1970 | 5 26 | 12 | 1 | ALMA  | 34.8 | 79.9 | 25 | 0    |
| 1970 | 5 26 | 18 | 1 | ALMA  | 35.7 | 78.7 | 25 | 0    |
| 1970 | 5 27 | 0  | 1 | ALMA  | 36.5 | 77.0 | 25 | 1003 |
| 1970 | 5 27 | 6  | 1 | ALMA  | 37.0 | 75.5 | 25 | 0    |
| 1970 | 7 19 | 0  | 2 | BECKY | 18.5 | 83.5 | 25 | 0    |
| 1970 | 7 19 | 6  | 2 | BECKY | 18.8 | 84.5 | 25 | 0    |
| 1970 | 7 19 | 12 | 2 | BECKY | 19.4 | 85.2 | 30 | 0    |
| 1970 | 7 19 | 18 | 2 | BECKY | 20.3 | 85.6 | 30 | 1010 |
| 1970 | 7 20 | 0  | 2 | BECKY | 21.3 | 85.9 | 30 | 0    |
| 1970 | 7 20 | 6  | 2 | BECKY | 22.3 | 86.2 | 30 | 0    |
| 1970 | 7 20 | 12 | 2 | BECKY | 23.3 | 86.4 | 40 | 0    |
| 1970 | 7 20 | 18 | 2 | BECKY | 24.1 | 86.6 | 45 | 1008 |
| 1970 | 7 21 | 0  | 2 | BECKY | 25.0 | 86.6 | 50 | 1003 |
| 1970 | 7 21 | 6  | 2 | BECKY | 25.8 | 86.7 | 55 | 1004 |

|      |   |    |    |   |           |      |       |     |      |
|------|---|----|----|---|-----------|------|-------|-----|------|
| 1970 | 7 | 21 | 12 | 2 | BECKY     | 26.6 | 86.6  | 55  | 1006 |
| 1970 | 7 | 21 | 18 | 2 | BECKY     | 27.5 | 86.3  | 55  | 0    |
| 1970 | 7 | 22 | 0  | 2 | BECKY     | 28.3 | 86.0  | 45  | 0    |
| 1970 | 7 | 22 | 6  | 2 | BECKY     | 29.2 | 85.5  | 40  | 0    |
| 1970 | 7 | 22 | 12 | 2 | BECKY     | 29.9 | 85.1  | 30  | 1009 |
| 1970 | 7 | 22 | 18 | 2 | BECKY     | 31.7 | 84.7  | 25  | 0    |
| 1970 | 7 | 23 | 0  | 2 | BECKY     | 33.4 | 85.2  | 25  | 0    |
| 1970 | 7 | 23 | 6  | 2 | BECKY     | 35.3 | 86.0  | 25  | 1015 |
| 1970 | 7 | 23 | 12 | 2 | BECKY     | 37.2 | 86.9  | 20  | 0    |
| 1970 | 7 | 31 | 0  | 3 | CELIA     | 18.5 | 82.5  | 25  | 1008 |
| 1970 | 7 | 31 | 6  | 3 | CELIA     | 19.5 | 82.9  | 25  | 0    |
| 1970 | 7 | 31 | 12 | 3 | CELIA     | 20.3 | 83.2  | 25  | 0    |
| 1970 | 7 | 31 | 18 | 3 | CELIA     | 21.1 | 83.8  | 30  | 0    |
| 1970 | 8 | 1  | 0  | 3 | CELIA     | 21.9 | 84.3  | 30  | 1007 |
| 1970 | 8 | 1  | 6  | 3 | CELIA     | 22.7 | 85.0  | 30  | 0    |
| 1970 | 8 | 1  | 12 | 3 | CELIA     | 23.3 | 85.8  | 45  | 993  |
| 1970 | 8 | 1  | 18 | 3 | CELIA     | 23.9 | 86.5  | 60  | 990  |
| 1970 | 8 | 2  | 0  | 3 | CELIA     | 24.3 | 87.2  | 100 | 965  |
| 1970 | 8 | 2  | 6  | 3 | CELIA     | 24.9 | 88.3  | 90  | 975  |
| 1970 | 8 | 2  | 12 | 3 | CELIA     | 25.3 | 89.6  | 85  | 986  |
| 1970 | 8 | 2  | 18 | 3 | CELIA     | 25.8 | 90.8  | 85  | 984  |
| 1970 | 8 | 3  | 0  | 3 | CELIA     | 26.2 | 92.0  | 80  | 0    |
| 1970 | 8 | 3  | 6  | 3 | CELIA     | 26.6 | 93.5  | 75  | 988  |
| 1970 | 8 | 3  | 12 | 3 | CELIA     | 27.0 | 94.9  | 90  | 971  |
| 1970 | 8 | 3  | 18 | 3 | CELIA     | 27.5 | 96.3  | 110 | 945  |
| 1970 | 8 | 4  | 0  | 3 | CELIA     | 28.1 | 97.8  | 70  | 950  |
| 1970 | 8 | 4  | 6  | 3 | CELIA     | 28.6 | 99.3  | 55  | 985  |
| 1970 | 8 | 4  | 12 | 3 | CELIA     | 29.1 | 100.8 | 50  | 992  |
| 1970 | 8 | 4  | 18 | 3 | CELIA     | 29.7 | 102.1 | 35  | 0    |
| 1970 | 8 | 5  | 0  | 3 | CELIA     | 30.3 | 103.3 | 30  | 0    |
| 1970 | 8 | 5  | 6  | 3 | CELIA     | 30.9 | 104.8 | 30  | 0    |
| 1970 | 8 | 5  | 12 | 3 | CELIA     | 31.5 | 105.8 | 25  | 1007 |
| 1970 | 8 | 5  | 18 | 3 | CELIA     | 32.3 | 107.0 | 25  | 0    |
| 1970 | 8 | 15 | 12 | 4 | NOT NAMED | 27.0 | 75.5  | 25  | 1015 |
| 1970 | 8 | 15 | 18 | 4 | NOT NAMED | 28.3 | 77.0  | 25  | 0    |
| 1970 | 8 | 16 | 0  | 4 | NOT NAMED | 29.5 | 78.0  | 25  | 0    |
| 1970 | 8 | 16 | 6  | 4 | NOT NAMED | 30.0 | 78.4  | 30  | 0    |
| 1970 | 8 | 16 | 12 | 4 | NOT NAMED | 30.5 | 78.5  | 30  | 0    |
| 1970 | 8 | 16 | 18 | 4 | NOT NAMED | 31.0 | 78.5  | 30  | 0    |
| 1970 | 8 | 17 | 0  | 4 | NOT NAMED | 32.5 | 78.0  | 30  | 1013 |
| 1970 | 8 | 17 | 6  | 4 | NOT NAMED | 33.5 | 78.0  | 30  | 0    |
| 1970 | 8 | 17 | 12 | 4 | NOT NAMED | 35.0 | 76.5  | 30  | 0    |
| 1970 | 8 | 17 | 18 | 4 | NOT NAMED | 36.0 | 75.5  | 30  | 1011 |
| 1970 | 8 | 18 | 0  | 4 | NOT NAMED | 37.0 | 72.5  | 40  | 1005 |

|      |      |      |           |      |      |    |      |
|------|------|------|-----------|------|------|----|------|
| 1970 | 8 18 | 6 4  | NOT NAMED | 39.0 | 69.0 | 50 | 997  |
| 1970 | 8 18 | 12 4 | NOT NAMED | 40.0 | 65.5 | 55 | 992  |
| 1970 | 8 18 | 18 4 | NOT NAMED | 42.5 | 58.5 | 60 | 992  |
| 1970 | 8 19 | 0 4  | NOT NAMED | 44.0 | 56.0 | 55 | 0    |
| 1970 | 8 17 | 12 5 | DOROTHY   | 11.0 | 41.0 | 25 | 0    |
| 1970 | 8 17 | 18 5 | DOROTHY   | 11.3 | 42.7 | 25 | 0    |
| 1970 | 8 18 | 0 5  | DOROTHY   | 11.5 | 44.3 | 25 | 0    |
| 1970 | 8 18 | 6 5  | DOROTHY   | 11.8 | 45.9 | 25 | 0    |
| 1970 | 8 18 | 12 5 | DOROTHY   | 12.0 | 47.5 | 30 | 0    |
| 1970 | 8 18 | 18 5 | DOROTHY   | 12.4 | 49.1 | 30 | 0    |
| 1970 | 8 19 | 0 5  | DOROTHY   | 12.8 | 50.7 | 35 | 0    |
| 1970 | 8 19 | 6 5  | DOROTHY   | 13.1 | 52.2 | 40 | 0    |
| 1970 | 8 19 | 12 5 | DOROTHY   | 13.3 | 53.6 | 50 | 1000 |
| 1970 | 8 19 | 18 5 | DOROTHY   | 13.6 | 55.0 | 55 | 1005 |
| 1970 | 8 20 | 0 5  | DOROTHY   | 13.7 | 56.5 | 45 | 1003 |
| 1970 | 8 20 | 6 5  | DOROTHY   | 13.8 | 58.0 | 55 | 996  |
| 1970 | 8 20 | 12 5 | DOROTHY   | 13.9 | 59.5 | 60 | 998  |
| 1970 | 8 20 | 18 5 | DOROTHY   | 14.5 | 60.5 | 60 | 1002 |
| 1970 | 8 21 | 0 5  | DOROTHY   | 14.6 | 62.0 | 55 | 0    |
| 1970 | 8 21 | 6 5  | DOROTHY   | 14.8 | 63.5 | 50 | 0    |
| 1970 | 8 21 | 12 5 | DOROTHY   | 15.0 | 64.8 | 45 | 1006 |
| 1970 | 8 21 | 18 5 | DOROTHY   | 15.2 | 66.0 | 45 | 1005 |
| 1970 | 8 22 | 0 5  | DOROTHY   | 15.4 | 67.2 | 40 | 1007 |
| 1970 | 8 22 | 6 5  | DOROTHY   | 15.6 | 68.4 | 40 | 0    |
| 1970 | 8 22 | 12 5 | DOROTHY   | 15.8 | 69.6 | 35 | 0    |
| 1970 | 8 22 | 18 5 | DOROTHY   | 15.9 | 70.8 | 30 | 0    |
| 1970 | 8 23 | 0 5  | DOROTHY   | 16.0 | 72.0 | 30 | 0    |
| 1970 | 8 23 | 6 5  | DOROTHY   | 16.1 | 73.2 | 30 | 0    |
| 1970 | 8 23 | 12 5 | DOROTHY   | 16.2 | 74.4 | 30 | 0    |
| 1970 | 9 8  | 12 6 | ELLA      | 15.3 | 83.5 | 25 | 0    |
| 1970 | 9 8  | 18 6 | ELLA      | 16.0 | 83.8 | 25 | 0    |
| 1970 | 9 9  | 0 6  | ELLA      | 16.6 | 84.2 | 20 | 0    |
| 1970 | 9 9  | 6 6  | ELLA      | 17.2 | 84.6 | 25 | 0    |
| 1970 | 9 9  | 12 6 | ELLA      | 17.7 | 85.0 | 25 | 0    |
| 1970 | 9 9  | 18 6 | ELLA      | 18.6 | 85.7 | 30 | 1010 |
| 1970 | 9 10 | 0 6  | ELLA      | 19.4 | 86.3 | 30 | 0    |
| 1970 | 9 10 | 6 6  | ELLA      | 20.0 | 86.8 | 30 | 0    |
| 1970 | 9 10 | 12 6 | ELLA      | 20.8 | 87.6 | 30 | 0    |
| 1970 | 9 10 | 18 6 | ELLA      | 22.0 | 89.0 | 50 | 997  |
| 1970 | 9 11 | 0 6  | ELLA      | 23.0 | 90.8 | 65 | 993  |
| 1970 | 9 11 | 6 6  | ELLA      | 23.6 | 92.6 | 70 | 0    |
| 1970 | 9 11 | 12 6 | ELLA      | 23.9 | 94.2 | 75 | 0    |
| 1970 | 9 11 | 18 6 | ELLA      | 24.0 | 95.5 | 80 | 984  |
| 1970 | 9 12 | 0 6  | ELLA      | 23.9 | 96.5 | 85 | 973  |

|      |      |    |          |      |       |     |      |
|------|------|----|----------|------|-------|-----|------|
| 1970 | 9 12 | 6  | 6 ELLA   | 23.8 | 97.4  | 105 | 967  |
| 1970 | 9 12 | 12 | 6 ELLA   | 23.9 | 97.9  | 110 | 967  |
| 1970 | 9 12 | 18 | 6 ELLA   | 24.0 | 98.5  | 65  | 0    |
| 1970 | 9 13 | 0  | 6 ELLA   | 23.9 | 99.6  | 40  | 0    |
| 1970 | 9 13 | 6  | 6 ELLA   | 24.2 | 100.5 | 40  | 0    |
| 1970 | 9 12 | 0  | 7 FELICE | 25.5 | 77.5  | 25  | 0    |
| 1970 | 9 12 | 6  | 7 FELICE | 25.4 | 77.8  | 25  | 0    |
| 1970 | 9 12 | 12 | 7 FELICE | 25.4 | 78.0  | 25  | 0    |
| 1970 | 9 12 | 18 | 7 FELICE | 25.3 | 78.3  | 25  | 0    |
| 1970 | 9 13 | 0  | 7 FELICE | 25.3 | 78.5  | 25  | 0    |
| 1970 | 9 13 | 6  | 7 FELICE | 25.2 | 79.1  | 25  | 0    |
| 1970 | 9 13 | 12 | 7 FELICE | 25.0 | 80.0  | 25  | 0    |
| 1970 | 9 13 | 18 | 7 FELICE | 24.9 | 81.0  | 30  | 0    |
| 1970 | 9 14 | 0  | 7 FELICE | 24.8 | 82.0  | 30  | 1011 |
| 1970 | 9 14 | 6  | 7 FELICE | 24.9 | 83.0  | 30  | 0    |
| 1970 | 9 14 | 12 | 7 FELICE | 25.3 | 84.0  | 30  | 0    |
| 1970 | 9 14 | 18 | 7 FELICE | 25.8 | 85.2  | 30  | 1008 |
| 1970 | 9 15 | 0  | 7 FELICE | 26.5 | 86.5  | 45  | 1006 |
| 1970 | 9 15 | 6  | 7 FELICE | 27.2 | 88.4  | 50  | 1006 |
| 1970 | 9 15 | 12 | 7 FELICE | 28.0 | 90.2  | 50  | 1003 |
| 1970 | 9 15 | 18 | 7 FELICE | 28.8 | 92.2  | 55  | 998  |
| 1970 | 9 16 | 0  | 7 FELICE | 29.4 | 94.1  | 60  | 997  |
| 1970 | 9 16 | 6  | 7 FELICE | 29.9 | 95.5  | 40  | 0    |
| 1970 | 9 16 | 12 | 7 FELICE | 30.6 | 96.5  | 30  | 0    |
| 1970 | 9 16 | 18 | 7 FELICE | 31.4 | 97.1  | 30  | 1006 |
| 1970 | 9 17 | 0  | 7 FELICE | 32.2 | 97.5  | 25  | 0    |
| 1970 | 9 17 | 6  | 7 FELICE | 33.0 | 97.6  | 25  | 0    |
| 1970 | 9 17 | 12 | 7 FELICE | 33.8 | 97.2  | 25  | 0    |
| 1970 | 9 26 | 12 | 8 GRETA  | 22.4 | 75.4  | 35  | 1010 |
| 1970 | 9 26 | 18 | 8 GRETA  | 22.7 | 76.2  | 35  | 0    |
| 1970 | 9 27 | 0  | 8 GRETA  | 23.3 | 77.2  | 45  | 1005 |
| 1970 | 9 27 | 6  | 8 GRETA  | 23.8 | 78.3  | 45  | 0    |
| 1970 | 9 27 | 12 | 8 GRETA  | 24.1 | 79.8  | 45  | 1005 |
| 1970 | 9 27 | 18 | 8 GRETA  | 24.4 | 81.3  | 30  | 1007 |
| 1970 | 9 28 | 0  | 8 GRETA  | 24.7 | 82.8  | 30  | 0    |
| 1970 | 9 28 | 6  | 8 GRETA  | 24.9 | 83.4  | 30  | 0    |
| 1970 | 9 28 | 12 | 8 GRETA  | 25.0 | 83.8  | 30  | 0    |
| 1970 | 9 28 | 18 | 8 GRETA  | 24.9 | 84.2  | 30  | 0    |
| 1970 | 9 29 | 0  | 8 GRETA  | 24.8 | 84.5  | 30  | 0    |
| 1970 | 9 29 | 6  | 8 GRETA  | 24.7 | 84.7  | 30  | 0    |
| 1970 | 9 29 | 12 | 8 GRETA  | 24.6 | 84.8  | 30  | 0    |
| 1970 | 9 29 | 18 | 8 GRETA  | 24.4 | 85.1  | 30  | 0    |
| 1970 | 9 30 | 0  | 8 GRETA  | 24.1 | 85.4  | 30  | 0    |
| 1970 | 9 30 | 6  | 8 GRETA  | 23.7 | 85.8  | 30  | 0    |



|      |    |    |    |    |           |      |      |    |      |
|------|----|----|----|----|-----------|------|------|----|------|
| 1970 | 9  | 30 | 12 | 8  | GRETA     | 23.3 | 86.3 | 30 | 0    |
| 1970 | 9  | 30 | 18 | 8  | GRETA     | 23.0 | 86.8 | 30 | 0    |
| 1970 | 10 | 1  | 0  | 8  | GRETA     | 22.6 | 87.3 | 30 | 1007 |
| 1970 | 10 | 1  | 6  | 8  | GRETA     | 22.2 | 87.7 | 30 | 0    |
| 1970 | 10 | 1  | 12 | 8  | GRETA     | 21.8 | 88.2 | 30 | 1006 |
| 1970 | 10 | 1  | 18 | 8  | GRETA     | 21.4 | 88.8 | 30 | 0    |
| 1970 | 10 | 2  | 0  | 8  | GRETA     | 21.1 | 89.4 | 30 | 0    |
| 1970 | 10 | 2  | 6  | 8  | GRETA     | 20.9 | 90.1 | 30 | 0    |
| 1970 | 10 | 2  | 12 | 8  | GRETA     | 20.9 | 90.7 | 25 | 0    |
| 1970 | 10 | 2  | 18 | 8  | GRETA     | 20.9 | 91.3 | 25 | 0    |
| 1970 | 10 | 3  | 0  | 8  | GRETA     | 20.9 | 91.9 | 25 | 1008 |
| 1970 | 10 | 3  | 6  | 8  | GRETA     | 20.9 | 92.5 | 25 | 0    |
| 1970 | 10 | 3  | 12 | 8  | GRETA     | 21.0 | 93.1 | 25 | 1009 |
| 1970 | 10 | 3  | 18 | 8  | GRETA     | 21.1 | 93.8 | 25 | 0    |
| 1970 | 10 | 4  | 0  | 8  | GRETA     | 21.3 | 94.7 | 25 | 0    |
| 1970 | 10 | 4  | 6  | 8  | GRETA     | 21.7 | 95.7 | 25 | 0    |
| 1970 | 10 | 4  | 12 | 8  | GRETA     | 22.1 | 96.9 | 25 | 1010 |
| 1970 | 10 | 4  | 18 | 8  | GRETA     | 22.5 | 98.2 | 25 | 0    |
| 1970 | 10 | 5  | 0  | 8  | GRETA     | 23.0 | 99.5 | 25 | 0    |
| 1970 | 10 | 12 | 12 | 9  | NOT NAMED | 24.5 | 68.5 | 30 | 1003 |
| 1970 | 10 | 12 | 18 | 9  | NOT NAMED | 25.0 | 67.9 | 30 | 0    |
| 1970 | 10 | 13 | 0  | 9  | NOT NAMED | 25.5 | 67.0 | 30 | 0    |
| 1970 | 10 | 13 | 6  | 9  | NOT NAMED | 25.9 | 65.5 | 35 | 0    |
| 1970 | 10 | 13 | 12 | 9  | NOT NAMED | 26.3 | 64.0 | 35 | 1002 |
| 1970 | 10 | 13 | 18 | 9  | NOT NAMED | 26.7 | 63.6 | 35 | 0    |
| 1970 | 10 | 14 | 0  | 9  | NOT NAMED | 27.0 | 63.5 | 40 | 1001 |
| 1970 | 10 | 14 | 6  | 9  | NOT NAMED | 27.0 | 65.0 | 40 | 0    |
| 1970 | 10 | 14 | 12 | 9  | NOT NAMED | 27.0 | 66.5 | 45 | 1001 |
| 1970 | 10 | 14 | 18 | 9  | NOT NAMED | 27.3 | 67.2 | 45 | 0    |
| 1970 | 10 | 15 | 0  | 9  | NOT NAMED | 27.5 | 67.5 | 50 | 997  |
| 1970 | 10 | 15 | 6  | 9  | NOT NAMED | 27.8 | 67.6 | 55 | 0    |
| 1970 | 10 | 15 | 12 | 9  | NOT NAMED | 28.0 | 67.5 | 55 | 995  |
| 1970 | 10 | 15 | 18 | 9  | NOT NAMED | 28.8 | 67.4 | 60 | 0    |
| 1970 | 10 | 16 | 0  | 9  | NOT NAMED | 30.0 | 67.0 | 60 | 991  |
| 1970 | 10 | 16 | 6  | 9  | NOT NAMED | 30.7 | 66.6 | 60 | 0    |
| 1970 | 10 | 16 | 12 | 9  | NOT NAMED | 31.5 | 66.0 | 65 | 989  |
| 1970 | 10 | 16 | 18 | 9  | NOT NAMED | 32.5 | 64.7 | 70 | 0    |
| 1970 | 10 | 17 | 0  | 9  | NOT NAMED | 34.0 | 63.0 | 75 | 980  |
| 1970 | 10 | 17 | 6  | 9  | NOT NAMED | 36.5 | 61.7 | 85 | 0    |
| 1970 | 10 | 17 | 12 | 9  | NOT NAMED | 39.0 | 61.0 | 90 | 974  |
| 1970 | 10 | 17 | 18 | 9  | NOT NAMED | 42.5 | 57.5 | 70 | 980  |
| 1970 | 10 | 18 | 0  | 9  | NOT NAMED | 47.0 | 53.0 | 55 | 0    |
| 1970 | 10 | 20 | 12 | 10 | NOT NAMED | 34.0 | 48.0 | 25 | 1013 |
| 1970 | 10 | 20 | 18 | 10 | NOT NAMED | 34.3 | 47.3 | 30 | 0    |

|             |       |           |      |      |    |      |
|-------------|-------|-----------|------|------|----|------|
| 1970 10 21  | 0 10  | NOT NAMED | 34.5 | 46.5 | 30 | 1009 |
| 1970 10 21  | 6 10  | NOT NAMED | 34.8 | 45.8 | 35 | 0    |
| 1970 10 21  | 12 10 | NOT NAMED | 35.0 | 45.0 | 35 | 1005 |
| 1970 10 21  | 18 10 | NOT NAMED | 35.0 | 45.0 | 40 | 0    |
| 1970 10 22  | 0 10  | NOT NAMED | 35.0 | 45.0 | 40 | 0    |
| 1970 10 22  | 6 10  | NOT NAMED | 35.0 | 45.0 | 45 | 0    |
| 1970 10 22  | 12 10 | NOT NAMED | 35.0 | 45.0 | 45 | 1000 |
| 1970 10 22  | 18 10 | NOT NAMED | 35.2 | 44.7 | 45 | 0    |
| 1970 10 23  | 0 10  | NOT NAMED | 35.5 | 44.0 | 45 | 997  |
| 1970 10 23  | 6 10  | NOT NAMED | 36.0 | 43.2 | 45 | 0    |
| 1970 10 23  | 12 10 | NOT NAMED | 36.5 | 42.5 | 50 | 0    |
| 1970 10 23  | 18 10 | NOT NAMED | 36.6 | 42.1 | 50 | 0    |
| 1970 10 24  | 0 10  | NOT NAMED | 36.5 | 41.8 | 50 | 0    |
| 1970 10 24  | 6 10  | NOT NAMED | 36.3 | 41.7 | 50 | 0    |
| 1970 10 24  | 12 10 | NOT NAMED | 36.0 | 41.5 | 50 | 0    |
| 1970 10 24  | 18 10 | NOT NAMED | 35.5 | 41.3 | 50 | 0    |
| 1970 10 25  | 0 10  | NOT NAMED | 35.0 | 41.0 | 50 | 0    |
| 1970 10 25  | 6 10  | NOT NAMED | 34.5 | 40.8 | 55 | 0    |
| 1970 10 25  | 12 10 | NOT NAMED | 34.0 | 40.5 | 55 | 988  |
| 1970 10 25  | 18 10 | NOT NAMED | 33.5 | 40.0 | 55 | 0    |
| 1970 10 26  | 0 10  | NOT NAMED | 35.0 | 39.0 | 60 | 0    |
| 1970 10 26  | 6 10  | NOT NAMED | 35.5 | 38.5 | 60 | 0    |
| 1970 10 26  | 12 10 | NOT NAMED | 36.0 | 38.0 | 60 | 988  |
| 1970 10 26  | 18 10 | NOT NAMED | 36.5 | 37.5 | 60 | 0    |
| 1970 10 27  | 0 10  | NOT NAMED | 37.0 | 36.5 | 65 | 0    |
| 1970 10 27  | 6 10  | NOT NAMED | 37.8 | 35.3 | 65 | 0    |
| 1970 10 27  | 12 10 | NOT NAMED | 38.5 | 34.0 | 60 | 0    |
| 1970 10 27  | 18 10 | NOT NAMED | 39.3 | 32.8 | 60 | 0    |
| 1970 10 28  | 0 10  | NOT NAMED | 40.0 | 31.5 | 60 | 0    |
| 1970 10 28  | 6 10  | NOT NAMED | 42.1 | 29.1 | 60 | 0    |
| 1970 10 28  | 12 10 | NOT NAMED | 46.0 | 25.0 | 60 | 0    |
| 1971 7 4 12 | 1     | ARLENE    | 33.5 | 75.5 | 25 | 0    |
| 1971 7 4 18 | 1     | ARLENE    | 34.0 | 75.2 | 25 | 0    |
| 1971 7 5 0  | 1     | ARLENE    | 34.5 | 74.8 | 25 | 0    |
| 1971 7 5 6  | 1     | ARLENE    | 35.2 | 74.3 | 30 | 0    |
| 1971 7 5 12 | 1     | ARLENE    | 35.9 | 73.7 | 30 | 0    |
| 1971 7 5 18 | 1     | ARLENE    | 36.7 | 72.9 | 45 | 1001 |
| 1971 7 6 0  | 1     | ARLENE    | 37.6 | 71.8 | 45 | 0    |
| 1971 7 6 6  | 1     | ARLENE    | 38.5 | 70.1 | 45 | 0    |
| 1971 7 6 12 | 1     | ARLENE    | 39.6 | 68.3 | 50 | 1003 |
| 1971 7 6 18 | 1     | ARLENE    | 40.7 | 65.9 | 55 | 1000 |
| 1971 7 7 0  | 1     | ARLENE    | 41.8 | 63.0 | 50 | 1000 |
| 1971 7 7 6  | 1     | ARLENE    | 43.1 | 59.5 | 45 | 1002 |
| 1971 7 7 12 | 1     | ARLENE    | 44.7 | 56.3 | 45 | 0    |

|      |   |    |    |   |           |      |      |    |      |
|------|---|----|----|---|-----------|------|------|----|------|
| 1971 | 7 | 7  | 18 | 1 | ARLENE    | 46.5 | 53.0 | 45 | 0    |
| 1971 | 7 | 8  | 0  | 1 | ARLENE    | 47.6 | 49.6 | 35 | 0    |
| 1971 | 8 | 3  | 12 | 2 | NOT NAMED | 31.0 | 63.5 | 15 | 0    |
| 1971 | 8 | 3  | 18 | 2 | NOT NAMED | 31.5 | 64.0 | 15 | 0    |
| 1971 | 8 | 4  | 0  | 2 | NOT NAMED | 32.0 | 64.5 | 15 | 0    |
| 1971 | 8 | 4  | 6  | 2 | NOT NAMED | 32.6 | 64.9 | 15 | 0    |
| 1971 | 8 | 4  | 12 | 2 | NOT NAMED | 33.5 | 65.0 | 15 | 1015 |
| 1971 | 8 | 4  | 18 | 2 | NOT NAMED | 34.6 | 64.6 | 15 | 0    |
| 1971 | 8 | 5  | 0  | 2 | NOT NAMED | 36.0 | 63.5 | 20 | 1013 |
| 1971 | 8 | 5  | 6  | 2 | NOT NAMED | 37.7 | 61.8 | 25 | 0    |
| 1971 | 8 | 5  | 12 | 2 | NOT NAMED | 39.5 | 60.0 | 30 | 0    |
| 1971 | 8 | 5  | 18 | 2 | NOT NAMED | 40.5 | 58.5 | 40 | 1000 |
| 1971 | 8 | 6  | 0  | 2 | NOT NAMED | 41.5 | 56.0 | 50 | 0    |
| 1971 | 8 | 6  | 6  | 2 | NOT NAMED | 43.4 | 52.6 | 60 | 0    |
| 1971 | 8 | 6  | 12 | 2 | NOT NAMED | 46.0 | 49.0 | 75 | 974  |
| 1971 | 8 | 6  | 18 | 2 | NOT NAMED | 50.0 | 46.0 | 70 | 0    |
| 1971 | 8 | 7  | 0  | 2 | NOT NAMED | 53.0 | 45.0 | 70 | 0    |
| 1971 | 8 | 7  | 6  | 2 | NOT NAMED | 55.7 | 43.8 | 70 | 0    |
| 1971 | 8 | 7  | 12 | 2 | NOT NAMED | 58.0 | 43.0 | 70 | 976  |
| 1971 | 8 | 10 | 12 | 3 | BETH      | 26.7 | 79.9 | 20 | 0    |
| 1971 | 8 | 10 | 18 | 3 | BETH      | 26.8 | 79.3 | 20 | 1013 |
| 1971 | 8 | 11 | 0  | 3 | BETH      | 27.4 | 78.5 | 20 | 0    |
| 1971 | 8 | 11 | 6  | 3 | BETH      | 28.0 | 78.3 | 25 | 0    |
| 1971 | 8 | 11 | 12 | 3 | BETH      | 28.8 | 78.1 | 25 | 0    |
| 1971 | 8 | 11 | 18 | 3 | BETH      | 29.7 | 77.7 | 30 | 1010 |
| 1971 | 8 | 12 | 0  | 3 | BETH      | 30.7 | 77.2 | 30 | 0    |
| 1971 | 8 | 12 | 6  | 3 | BETH      | 31.5 | 76.7 | 30 | 0    |
| 1971 | 8 | 12 | 12 | 3 | BETH      | 32.3 | 76.3 | 30 | 0    |
| 1971 | 8 | 12 | 18 | 3 | BETH      | 32.7 | 76.0 | 30 | 0    |
| 1971 | 8 | 13 | 0  | 3 | BETH      | 33.2 | 75.3 | 30 | 0    |
| 1971 | 8 | 13 | 6  | 3 | BETH      | 33.3 | 74.7 | 30 | 1007 |
| 1971 | 8 | 13 | 12 | 3 | BETH      | 33.5 | 74.1 | 30 | 0    |
| 1971 | 8 | 13 | 18 | 3 | BETH      | 33.7 | 73.5 | 30 | 0    |
| 1971 | 8 | 14 | 0  | 3 | BETH      | 33.9 | 73.1 | 30 | 1004 |
| 1971 | 8 | 14 | 6  | 3 | BETH      | 34.2 | 72.7 | 30 | 0    |
| 1971 | 8 | 14 | 12 | 3 | BETH      | 34.4 | 72.3 | 45 | 995  |
| 1971 | 8 | 14 | 18 | 3 | BETH      | 35.8 | 71.0 | 55 | 0    |
| 1971 | 8 | 15 | 0  | 3 | BETH      | 37.2 | 69.9 | 70 | 990  |
| 1971 | 8 | 15 | 6  | 3 | BETH      | 38.4 | 68.5 | 70 | 982  |
| 1971 | 8 | 15 | 12 | 3 | BETH      | 39.7 | 67.2 | 75 | 977  |
| 1971 | 8 | 15 | 18 | 3 | BETH      | 40.8 | 65.8 | 75 | 0    |
| 1971 | 8 | 16 | 0  | 3 | BETH      | 42.0 | 64.5 | 65 | 978  |
| 1971 | 8 | 16 | 6  | 3 | BETH      | 43.2 | 63.3 | 65 | 979  |
| 1971 | 8 | 16 | 12 | 3 | BETH      | 44.0 | 62.5 | 65 | 984  |

|      |         |         |      |      |    |      |
|------|---------|---------|------|------|----|------|
| 1971 | 8 16 18 | 3 BETH  | 45.3 | 61.5 | 65 | 0    |
| 1971 | 8 17 0  | 3 BETH  | 46.7 | 60.2 | 60 | 998  |
| 1971 | 8 17 6  | 3 BETH  | 48.3 | 59.0 | 50 | 998  |
| 1971 | 8 17 12 | 3 BETH  | 49.5 | 57.7 | 45 | 998  |
| 1971 | 8 18 12 | 4 CHLOE | 13.0 | 52.5 | 30 | 1007 |
| 1971 | 8 18 18 | 4 CHLOE | 13.2 | 55.0 | 30 | 0    |
| 1971 | 8 19 0  | 4 CHLOE | 13.5 | 57.0 | 30 | 0    |
| 1971 | 8 19 6  | 4 CHLOE | 13.8 | 59.0 | 30 | 0    |
| 1971 | 8 19 12 | 4 CHLOE | 14.0 | 60.7 | 30 | 0    |
| 1971 | 8 19 18 | 4 CHLOE | 14.2 | 62.0 | 30 | 0    |
| 1971 | 8 20 0  | 4 CHLOE | 14.3 | 63.5 | 35 | 1004 |
| 1971 | 8 20 6  | 4 CHLOE | 14.8 | 65.0 | 45 | 0    |
| 1971 | 8 20 12 | 4 CHLOE | 15.0 | 66.5 | 50 | 0    |
| 1971 | 8 20 18 | 4 CHLOE | 15.4 | 67.7 | 55 | 0    |
| 1971 | 8 21 0  | 4 CHLOE | 16.0 | 69.5 | 50 | 0    |
| 1971 | 8 21 6  | 4 CHLOE | 16.0 | 71.5 | 40 | 0    |
| 1971 | 8 21 12 | 4 CHLOE | 15.5 | 73.5 | 30 | 1007 |
| 1971 | 8 21 18 | 4 CHLOE | 15.0 | 75.0 | 30 | 0    |
| 1971 | 8 22 0  | 4 CHLOE | 14.8 | 76.0 | 25 | 0    |
| 1971 | 8 22 6  | 4 CHLOE | 14.8 | 77.0 | 25 | 0    |
| 1971 | 8 22 12 | 4 CHLOE | 15.0 | 78.0 | 25 | 0    |
| 1971 | 8 22 18 | 4 CHLOE | 15.2 | 79.0 | 25 | 0    |
| 1971 | 8 23 0  | 4 CHLOE | 15.6 | 80.0 | 25 | 0    |
| 1971 | 8 23 6  | 4 CHLOE | 16.0 | 81.0 | 25 | 0    |
| 1971 | 8 23 12 | 4 CHLOE | 16.5 | 82.0 | 25 | 0    |
| 1971 | 8 23 18 | 4 CHLOE | 17.0 | 83.0 | 25 | 0    |
| 1971 | 8 24 0  | 4 CHLOE | 17.4 | 84.0 | 25 | 1007 |
| 1971 | 8 24 6  | 4 CHLOE | 17.8 | 85.0 | 25 | 0    |
| 1971 | 8 24 12 | 4 CHLOE | 17.9 | 86.0 | 25 | 0    |
| 1971 | 8 24 18 | 4 CHLOE | 18.0 | 86.8 | 25 | 0    |
| 1971 | 8 25 0  | 4 CHLOE | 18.0 | 87.5 | 25 | 0    |
| 1971 | 8 25 6  | 4 CHLOE | 18.0 | 88.0 | 25 | 0    |
| 1971 | 8 25 12 | 4 CHLOE | 18.0 | 88.5 | 25 | 0    |
| 1971 | 8 20 12 | 5 DORIA | 11.5 | 47.0 | 25 | 0    |
| 1971 | 8 20 18 | 5 DORIA | 11.6 | 48.0 | 30 | 0    |
| 1971 | 8 21 0  | 5 DORIA | 11.7 | 49.0 | 30 | 0    |
| 1971 | 8 21 6  | 5 DORIA | 11.8 | 50.0 | 30 | 0    |
| 1971 | 8 21 12 | 5 DORIA | 12.0 | 51.0 | 30 | 0    |
| 1971 | 8 21 18 | 5 DORIA | 12.2 | 52.2 | 30 | 0    |
| 1971 | 8 22 0  | 5 DORIA | 12.8 | 53.4 | 30 | 0    |
| 1971 | 8 22 6  | 5 DORIA | 13.2 | 54.8 | 30 | 0    |
| 1971 | 8 22 12 | 5 DORIA | 14.0 | 56.0 | 25 | 0    |
| 1971 | 8 22 18 | 5 DORIA | 14.8 | 57.5 | 25 | 0    |
| 1971 | 8 23 0  | 5 DORIA | 15.7 | 59.0 | 25 | 0    |

|      |         |   |         |      |      |     |      |
|------|---------|---|---------|------|------|-----|------|
| 1971 | 8 23    | 6 | 5 DORIA | 16.5 | 60.8 | 25  | 0    |
| 1971 | 8 23 12 | 5 | DORIA   | 17.3 | 62.4 | 25  | 0    |
| 1971 | 8 23 18 | 5 | DORIA   | 18.0 | 64.0 | 25  | 0    |
| 1971 | 8 24    | 0 | 5 DORIA | 18.6 | 65.4 | 25  | 0    |
| 1971 | 8 24    | 6 | 5 DORIA | 19.2 | 66.9 | 25  | 0    |
| 1971 | 8 24 12 | 5 | DORIA   | 19.8 | 68.3 | 30  | 0    |
| 1971 | 8 24 18 | 5 | DORIA   | 20.4 | 69.8 | 30  | 0    |
| 1971 | 8 25    | 0 | 5 DORIA | 21.0 | 71.0 | 30  | 0    |
| 1971 | 8 25    | 6 | 5 DORIA | 21.8 | 72.2 | 30  | 0    |
| 1971 | 8 25 12 | 5 | DORIA   | 22.5 | 73.2 | 30  | 0    |
| 1971 | 8 25 18 | 5 | DORIA   | 23.2 | 74.2 | 30  | 0    |
| 1971 | 8 26    | 0 | 5 DORIA | 24.2 | 75.1 | 25  | 0    |
| 1971 | 8 26    | 6 | 5 DORIA | 25.4 | 75.6 | 25  | 0    |
| 1971 | 8 26 12 | 5 | DORIA   | 26.8 | 76.4 | 30  | 0    |
| 1971 | 8 26 18 | 5 | DORIA   | 28.2 | 77.0 | 30  | 1008 |
| 1971 | 8 27    | 0 | 5 DORIA | 29.2 | 77.2 | 40  | 1006 |
| 1971 | 8 27    | 6 | 5 DORIA | 31.0 | 77.2 | 45  | 999  |
| 1971 | 8 27 12 | 5 | DORIA   | 32.8 | 77.2 | 50  | 998  |
| 1971 | 8 27 18 | 5 | DORIA   | 34.8 | 76.8 | 55  | 989  |
| 1971 | 8 28    | 0 | 5 DORIA | 36.5 | 76.5 | 55  | 0    |
| 1971 | 8 28    | 6 | 5 DORIA | 38.5 | 75.3 | 50  | 993  |
| 1971 | 8 28 12 | 5 | DORIA   | 41.2 | 73.7 | 45  | 997  |
| 1971 | 8 28 18 | 5 | DORIA   | 43.8 | 71.8 | 45  | 0    |
| 1971 | 8 29    | 0 | 5 DORIA | 46.0 | 70.0 | 35  | 0    |
| 1971 | 8 29    | 6 | 5 DORIA | 48.0 | 68.0 | 35  | 0    |
| 1971 | 9 5 18  | 6 | EDITH   | 11.4 | 58.0 | 25  | 1010 |
| 1971 | 9 6     | 0 | 6 EDITH | 11.6 | 59.4 | 30  | 0    |
| 1971 | 9 6     | 6 | 6 EDITH | 11.8 | 61.1 | 30  | 0    |
| 1971 | 9 6 12  | 6 | EDITH   | 12.0 | 62.8 | 30  | 0    |
| 1971 | 9 6 18  | 6 | EDITH   | 12.2 | 64.4 | 25  | 0    |
| 1971 | 9 7     | 0 | 6 EDITH | 12.3 | 66.0 | 25  | 0    |
| 1971 | 9 7     | 6 | 6 EDITH | 12.5 | 67.7 | 25  | 0    |
| 1971 | 9 7 12  | 6 | EDITH   | 12.7 | 69.1 | 35  | 1006 |
| 1971 | 9 7 18  | 6 | EDITH   | 12.9 | 70.9 | 45  | 995  |
| 1971 | 9 8     | 0 | 6 EDITH | 13.0 | 72.3 | 60  | 0    |
| 1971 | 9 8     | 6 | 6 EDITH | 13.2 | 73.8 | 65  | 993  |
| 1971 | 9 8 12  | 6 | EDITH   | 13.6 | 75.3 | 65  | 0    |
| 1971 | 9 8 18  | 6 | EDITH   | 13.8 | 77.2 | 75  | 982  |
| 1971 | 9 9     | 0 | 6 EDITH | 14.0 | 78.8 | 90  | 0    |
| 1971 | 9 9     | 6 | 6 EDITH | 14.2 | 80.5 | 105 | 0    |
| 1971 | 9 9 12  | 6 | EDITH   | 14.4 | 81.9 | 120 | 960  |
| 1971 | 9 9 18  | 6 | EDITH   | 14.8 | 83.2 | 140 | 943  |
| 1971 | 9 10    | 0 | 6 EDITH | 15.2 | 84.1 | 100 | 0    |
| 1971 | 9 10    | 6 | 6 EDITH | 15.5 | 84.9 | 80  | 0    |

|      |         |         |      |      |    |      |
|------|---------|---------|------|------|----|------|
| 1971 | 9 10 12 | 6 EDITH | 15.9 | 85.8 | 70 | 0    |
| 1971 | 9 10 18 | 6 EDITH | 16.5 | 86.9 | 65 | 0    |
| 1971 | 9 11 0  | 6 EDITH | 17.3 | 87.8 | 60 | 0    |
| 1971 | 9 11 6  | 6 EDITH | 18.1 | 88.4 | 60 | 0    |
| 1971 | 9 11 12 | 6 EDITH | 18.6 | 89.2 | 45 | 0    |
| 1971 | 9 11 18 | 6 EDITH | 19.3 | 89.9 | 35 | 0    |
| 1971 | 9 12 0  | 6 EDITH | 19.8 | 90.5 | 35 | 1000 |
| 1971 | 9 12 6  | 6 EDITH | 20.7 | 91.4 | 35 | 1001 |
| 1971 | 9 12 12 | 6 EDITH | 21.5 | 92.2 | 35 | 1000 |
| 1971 | 9 12 18 | 6 EDITH | 21.9 | 92.9 | 35 | 1000 |
| 1971 | 9 13 0  | 6 EDITH | 22.1 | 93.3 | 35 | 0    |
| 1971 | 9 13 6  | 6 EDITH | 22.3 | 94.2 | 45 | 998  |
| 1971 | 9 13 12 | 6 EDITH | 22.9 | 95.1 | 40 | 0    |
| 1971 | 9 13 18 | 6 EDITH | 23.1 | 96.1 | 40 | 0    |
| 1971 | 9 14 0  | 6 EDITH | 23.3 | 96.9 | 45 | 0    |
| 1971 | 9 14 6  | 6 EDITH | 23.4 | 97.6 | 45 | 0    |
| 1971 | 9 14 12 | 6 EDITH | 23.7 | 97.8 | 45 | 0    |
| 1971 | 9 14 18 | 6 EDITH | 23.9 | 97.8 | 45 | 992  |
| 1971 | 9 15 0  | 6 EDITH | 24.2 | 97.6 | 45 | 989  |
| 1971 | 9 15 6  | 6 EDITH | 24.7 | 97.2 | 45 | 0    |
| 1971 | 9 15 12 | 6 EDITH | 25.3 | 96.8 | 50 | 984  |
| 1971 | 9 15 18 | 6 EDITH | 26.2 | 96.2 | 65 | 982  |
| 1971 | 9 16 0  | 6 EDITH | 27.3 | 95.4 | 70 | 979  |
| 1971 | 9 16 6  | 6 EDITH | 28.4 | 94.6 | 80 | 977  |
| 1971 | 9 16 12 | 6 EDITH | 29.5 | 93.1 | 85 | 978  |
| 1971 | 9 16 18 | 6 EDITH | 30.5 | 91.6 | 60 | 0    |
| 1971 | 9 17 0  | 6 EDITH | 31.8 | 89.9 | 40 | 0    |
| 1971 | 9 17 6  | 6 EDITH | 32.3 | 89.0 | 30 | 0    |
| 1971 | 9 17 12 | 6 EDITH | 32.9 | 87.8 | 25 | 0    |
| 1971 | 9 17 18 | 6 EDITH | 33.3 | 87.0 | 25 | 0    |
| 1971 | 9 18 0  | 6 EDITH | 33.7 | 85.8 | 25 | 0    |
| 1971 | 9 18 6  | 6 EDITH | 34.0 | 84.7 | 25 | 0    |
| 1971 | 9 3 12  | 7 FERN  | 27.5 | 87.5 | 25 | 0    |
| 1971 | 9 3 18  | 7 FERN  | 27.7 | 87.7 | 25 | 0    |
| 1971 | 9 4 0   | 7 FERN  | 28.0 | 88.0 | 25 | 0    |
| 1971 | 9 4 6   | 7 FERN  | 28.2 | 88.6 | 25 | 0    |
| 1971 | 9 4 12  | 7 FERN  | 28.6 | 89.0 | 25 | 0    |
| 1971 | 9 4 18  | 7 FERN  | 29.0 | 89.3 | 25 | 0    |
| 1971 | 9 5 0   | 7 FERN  | 29.5 | 89.5 | 25 | 0    |
| 1971 | 9 5 6   | 7 FERN  | 30.1 | 89.6 | 25 | 0    |
| 1971 | 9 5 12  | 7 FERN  | 30.7 | 89.8 | 25 | 0    |
| 1971 | 9 5 18  | 7 FERN  | 30.6 | 89.9 | 25 | 0    |
| 1971 | 9 6 0   | 7 FERN  | 30.3 | 90.0 | 25 | 0    |
| 1971 | 9 6 6   | 7 FERN  | 29.9 | 90.3 | 25 | 0    |

|      |   |    |    |          |      |       |    |      |
|------|---|----|----|----------|------|-------|----|------|
| 1971 | 9 | 6  | 12 | 7 FERN   | 29.5 | 90.5  | 25 | 0    |
| 1971 | 9 | 6  | 18 | 7 FERN   | 29.0 | 91.0  | 25 | 0    |
| 1971 | 9 | 7  | 0  | 7 FERN   | 28.6 | 91.3  | 25 | 0    |
| 1971 | 9 | 7  | 6  | 7 FERN   | 28.1 | 91.6  | 25 | 0    |
| 1971 | 9 | 7  | 12 | 7 FERN   | 27.7 | 92.0  | 30 | 0    |
| 1971 | 9 | 7  | 18 | 7 FERN   | 27.3 | 92.3  | 30 | 0    |
| 1971 | 9 | 8  | 0  | 7 FERN   | 26.9 | 92.6  | 40 | 1000 |
| 1971 | 9 | 8  | 6  | 7 FERN   | 26.6 | 92.8  | 45 | 1000 |
| 1971 | 9 | 8  | 12 | 7 FERN   | 26.4 | 93.1  | 50 | 1000 |
| 1971 | 9 | 8  | 18 | 7 FERN   | 26.3 | 93.4  | 55 | 995  |
| 1971 | 9 | 9  | 0  | 7 FERN   | 26.4 | 93.7  | 65 | 987  |
| 1971 | 9 | 9  | 6  | 7 FERN   | 26.7 | 94.0  | 80 | 993  |
| 1971 | 9 | 9  | 12 | 7 FERN   | 27.1 | 94.3  | 80 | 992  |
| 1971 | 9 | 9  | 18 | 7 FERN   | 27.5 | 94.5  | 75 | 992  |
| 1971 | 9 | 10 | 0  | 7 FERN   | 28.0 | 94.8  | 70 | 988  |
| 1971 | 9 | 10 | 6  | 7 FERN   | 28.5 | 95.3  | 65 | 988  |
| 1971 | 9 | 10 | 12 | 7 FERN   | 28.5 | 96.0  | 60 | 979  |
| 1971 | 9 | 10 | 18 | 7 FERN   | 28.3 | 96.5  | 60 | 979  |
| 1971 | 9 | 11 | 0  | 7 FERN   | 28.0 | 96.9  | 55 | 988  |
| 1971 | 9 | 11 | 6  | 7 FERN   | 27.7 | 97.3  | 55 | 983  |
| 1971 | 9 | 11 | 12 | 7 FERN   | 27.5 | 97.6  | 45 | 978  |
| 1971 | 9 | 11 | 18 | 7 FERN   | 27.3 | 98.0  | 40 | 0    |
| 1971 | 9 | 12 | 0  | 7 FERN   | 27.1 | 98.4  | 35 | 0    |
| 1971 | 9 | 12 | 6  | 7 FERN   | 27.1 | 98.8  | 35 | 0    |
| 1971 | 9 | 12 | 12 | 7 FERN   | 27.0 | 99.2  | 35 | 0    |
| 1971 | 9 | 12 | 18 | 7 FERN   | 26.9 | 99.7  | 30 | 0    |
| 1971 | 9 | 13 | 0  | 7 FERN   | 26.9 | 100.3 | 25 | 0    |
| 1971 | 9 | 6  | 0  | 8 GINGER | 25.5 | 71.5  | 25 | 0    |
| 1971 | 9 | 6  | 6  | 8 GINGER | 25.2 | 71.2  | 25 | 0    |
| 1971 | 9 | 6  | 12 | 8 GINGER | 25.0 | 71.0  | 25 | 0    |
| 1971 | 9 | 6  | 18 | 8 GINGER | 24.8 | 70.8  | 25 | 0    |
| 1971 | 9 | 7  | 0  | 8 GINGER | 24.6 | 70.5  | 25 | 0    |
| 1971 | 9 | 7  | 6  | 8 GINGER | 24.4 | 70.3  | 25 | 0    |
| 1971 | 9 | 7  | 12 | 8 GINGER | 24.3 | 69.9  | 25 | 0    |
| 1971 | 9 | 7  | 18 | 8 GINGER | 24.7 | 69.3  | 25 | 0    |
| 1971 | 9 | 8  | 0  | 8 GINGER | 25.2 | 68.8  | 25 | 0    |
| 1971 | 9 | 8  | 6  | 8 GINGER | 25.5 | 68.5  | 25 | 0    |
| 1971 | 9 | 8  | 12 | 8 GINGER | 25.9 | 68.2  | 25 | 0    |
| 1971 | 9 | 8  | 18 | 8 GINGER | 26.3 | 68.0  | 25 | 0    |
| 1971 | 9 | 9  | 0  | 8 GINGER | 26.6 | 67.9  | 25 | 0    |
| 1971 | 9 | 9  | 6  | 8 GINGER | 26.8 | 67.7  | 25 | 0    |
| 1971 | 9 | 9  | 12 | 8 GINGER | 27.0 | 67.6  | 25 | 1008 |
| 1971 | 9 | 9  | 18 | 8 GINGER | 27.3 | 67.4  | 30 | 0    |
| 1971 | 9 | 10 | 0  | 8 GINGER | 27.6 | 67.0  | 30 | 0    |

|      |      |    |          |      |      |    |      |
|------|------|----|----------|------|------|----|------|
| 1971 | 9 10 | 6  | 8 GINGER | 27.7 | 66.6 | 30 | 0    |
| 1971 | 9 10 | 12 | 8 GINGER | 27.7 | 66.1 | 40 | 1003 |
| 1971 | 9 10 | 18 | 8 GINGER | 27.7 | 65.5 | 45 | 0    |
| 1971 | 9 11 | 0  | 8 GINGER | 27.7 | 65.0 | 50 | 0    |
| 1971 | 9 11 | 6  | 8 GINGER | 27.8 | 64.2 | 55 | 0    |
| 1971 | 9 11 | 12 | 8 GINGER | 27.9 | 63.3 | 65 | 991  |
| 1971 | 9 11 | 18 | 8 GINGER | 28.3 | 62.4 | 65 | 0    |
| 1971 | 9 12 | 0  | 8 GINGER | 28.9 | 61.6 | 70 | 0    |
| 1971 | 9 12 | 6  | 8 GINGER | 29.6 | 60.7 | 75 | 0    |
| 1971 | 9 12 | 12 | 8 GINGER | 30.3 | 59.9 | 75 | 985  |
| 1971 | 9 12 | 18 | 8 GINGER | 31.1 | 59.0 | 80 | 0    |
| 1971 | 9 13 | 0  | 8 GINGER | 31.7 | 58.2 | 80 | 0    |
| 1971 | 9 13 | 6  | 8 GINGER | 32.3 | 57.2 | 85 | 0    |
| 1971 | 9 13 | 12 | 8 GINGER | 32.7 | 56.1 | 85 | 0    |
| 1971 | 9 13 | 18 | 8 GINGER | 33.0 | 54.9 | 90 | 959  |
| 1971 | 9 14 | 0  | 8 GINGER | 33.3 | 53.3 | 95 | 0    |
| 1971 | 9 14 | 6  | 8 GINGER | 33.6 | 52.7 | 90 | 0    |
| 1971 | 9 14 | 12 | 8 GINGER | 33.7 | 50.1 | 85 | 0    |
| 1971 | 9 14 | 18 | 8 GINGER | 33.3 | 48.3 | 80 | 964  |
| 1971 | 9 15 | 0  | 8 GINGER | 33.0 | 48.4 | 75 | 0    |
| 1971 | 9 15 | 6  | 8 GINGER | 32.9 | 48.7 | 75 | 0    |
| 1971 | 9 15 | 12 | 8 GINGER | 32.8 | 49.1 | 70 | 981  |
| 1971 | 9 15 | 18 | 8 GINGER | 32.7 | 49.4 | 70 | 0    |
| 1971 | 9 16 | 0  | 8 GINGER | 32.7 | 49.6 | 70 | 0    |
| 1971 | 9 16 | 6  | 8 GINGER | 32.7 | 49.8 | 70 | 0    |
| 1971 | 9 16 | 12 | 8 GINGER | 32.7 | 50.1 | 65 | 987  |
| 1971 | 9 16 | 18 | 8 GINGER | 32.7 | 50.5 | 65 | 0    |
| 1971 | 9 17 | 0  | 8 GINGER | 32.7 | 51.0 | 65 | 987  |
| 1971 | 9 17 | 6  | 8 GINGER | 32.7 | 51.5 | 65 | 0    |
| 1971 | 9 17 | 12 | 8 GINGER | 32.7 | 51.9 | 65 | 992  |
| 1971 | 9 17 | 18 | 8 GINGER | 32.6 | 52.2 | 65 | 0    |
| 1971 | 9 18 | 0  | 8 GINGER | 32.5 | 52.4 | 65 | 0    |
| 1971 | 9 18 | 6  | 8 GINGER | 32.3 | 52.6 | 65 | 0    |
| 1971 | 9 18 | 12 | 8 GINGER | 32.1 | 52.8 | 65 | 0    |
| 1971 | 9 18 | 18 | 8 GINGER | 31.8 | 52.8 | 65 | 0    |
| 1971 | 9 19 | 0  | 8 GINGER | 31.4 | 52.6 | 65 | 0    |
| 1971 | 9 19 | 6  | 8 GINGER | 31.0 | 52.2 | 65 | 0    |
| 1971 | 9 19 | 12 | 8 GINGER | 31.0 | 51.7 | 65 | 987  |
| 1971 | 9 19 | 18 | 8 GINGER | 31.2 | 51.6 | 65 | 0    |
| 1971 | 9 20 | 0  | 8 GINGER | 31.4 | 51.7 | 65 | 0    |
| 1971 | 9 20 | 6  | 8 GINGER | 31.6 | 51.8 | 65 | 0    |
| 1971 | 9 20 | 12 | 8 GINGER | 31.7 | 52.0 | 65 | 0    |
| 1971 | 9 20 | 18 | 8 GINGER | 31.8 | 52.4 | 65 | 0    |
| 1971 | 9 21 | 0  | 8 GINGER | 31.7 | 53.0 | 65 | 0    |



|      |      |      |          |      |      |    |      |
|------|------|------|----------|------|------|----|------|
| 1971 | 9 21 | 6    | 8 GINGER | 31.6 | 53.5 | 65 | 0    |
| 1971 | 9 21 | 12   | 8 GINGER | 31.5 | 54.2 | 65 | 993  |
| 1971 | 9 21 | 18   | 8 GINGER | 31.4 | 55.2 | 65 | 0    |
| 1971 | 9 22 | 0    | 8 GINGER | 31.3 | 56.5 | 65 | 994  |
| 1971 | 9 22 | 6    | 8 GINGER | 31.3 | 57.8 | 65 | 995  |
| 1971 | 9 22 | 12   | 8 GINGER | 31.2 | 59.2 | 65 | 995  |
| 1971 | 9 22 | 18   | 8 GINGER | 31.1 | 60.3 | 80 | 994  |
| 1971 | 9 23 | 0    | 8 GINGER | 31.0 | 61.5 | 80 | 993  |
| 1971 | 9 23 | 6    | 8 GINGER | 30.9 | 62.8 | 80 | 993  |
| 1971 | 9 23 | 12   | 8 GINGER | 30.8 | 64.0 | 75 | 994  |
| 1971 | 9 23 | 18   | 8 GINGER | 30.5 | 65.1 | 75 | 992  |
| 1971 | 9 24 | 0    | 8 GINGER | 30.1 | 66.2 | 75 | 988  |
| 1971 | 9 24 | 6    | 8 GINGER | 30.0 | 67.1 | 75 | 986  |
| 1971 | 9 24 | 12   | 8 GINGER | 30.0 | 67.5 | 70 | 993  |
| 1971 | 9 24 | 18   | 8 GINGER | 29.9 | 67.8 | 70 | 988  |
| 1971 | 9 25 | 0    | 8 GINGER | 29.8 | 68.2 | 70 | 980  |
| 1971 | 9 25 | 6    | 8 GINGER | 29.6 | 68.4 | 70 | 981  |
| 1971 | 9 25 | 12   | 8 GINGER | 29.4 | 68.5 | 75 | 984  |
| 1971 | 9 25 | 18   | 8 GINGER | 29.2 | 68.6 | 75 | 980  |
| 1971 | 9 26 | 0    | 8 GINGER | 28.8 | 68.8 | 75 | 976  |
| 1971 | 9 26 | 6    | 8 GINGER | 28.4 | 69.0 | 70 | 976  |
| 1971 | 9 26 | 12   | 8 GINGER | 28.2 | 69.3 | 65 | 982  |
| 1971 | 9 26 | 18   | 8 GINGER | 28.0 | 69.7 | 70 | 983  |
| 1971 | 9 27 | 0    | 8 GINGER | 27.9 | 70.2 | 70 | 980  |
| 1971 | 9 27 | 6    | 8 GINGER | 28.0 | 70.4 | 75 | 978  |
| 1971 | 9 27 | 12   | 8 GINGER | 28.2 | 70.6 | 80 | 975  |
| 1971 | 9 27 | 18   | 8 GINGER | 28.4 | 70.9 | 80 | 969  |
| 1971 | 9 28 | 0    | 8 GINGER | 28.7 | 71.0 | 80 | 969  |
| 1971 | 9 28 | 6    | 8 GINGER | 29.1 | 71.1 | 80 | 976  |
| 1971 | 9 28 | 12   | 8 GINGER | 29.5 | 71.3 | 80 | 981  |
| 1971 | 9 28 | 18   | 8 GINGER | 30.0 | 71.7 | 85 | 980  |
| 1971 | 9 29 | 0    | 8 GINGER | 30.5 | 72.2 | 85 | 985  |
| 1971 | 9 29 | 6    | 8 GINGER | 31.0 | 72.8 | 90 | 982  |
| 1971 | 9 29 | 12   | 8 GINGER | 31.6 | 73.5 | 90 | 983  |
| 1971 | 9 29 | 18   | 8 GINGER | 32.3 | 74.4 | 90 | 985  |
| 1971 | 9 30 | 0    | 8 GINGER | 32.9 | 75.0 | 85 | 988  |
| 1971 | 9 30 | 6    | 8 GINGER | 33.5 | 75.5 | 80 | 985  |
| 1971 | 9 30 | 12   | 8 GINGER | 34.0 | 76.0 | 75 | 985  |
| 1971 | 9 30 | 18   | 8 GINGER | 34.5 | 76.5 | 65 | 984  |
| 1971 | 10   | 1 0  | 8 GINGER | 34.7 | 77.0 | 60 | 991  |
| 1971 | 10   | 1 6  | 8 GINGER | 34.8 | 77.5 | 55 | 997  |
| 1971 | 10   | 1 12 | 8 GINGER | 34.9 | 78.0 | 45 | 1000 |
| 1971 | 10   | 1 18 | 8 GINGER | 35.2 | 78.2 | 30 | 1004 |
| 1971 | 10   | 2 0  | 8 GINGER | 35.6 | 78.3 | 30 | 0    |

|                       |      |      |    |      |
|-----------------------|------|------|----|------|
| 1971 10 2 6 8 GINGER  | 36.2 | 78.2 | 30 | 0    |
| 1971 10 2 12 8 GINGER | 36.8 | 78.1 | 30 | 0    |
| 1971 10 2 18 8 GINGER | 37.2 | 77.7 | 30 | 0    |
| 1971 10 3 0 8 GINGER  | 37.3 | 76.8 | 30 | 0    |
| 1971 10 3 6 8 GINGER  | 37.2 | 75.9 | 30 | 1008 |
| 1971 10 3 12 8 GINGER | 37.0 | 75.0 | 30 | 0    |
| 1971 10 3 18 8 GINGER | 36.7 | 74.1 | 30 | 0    |
| 1971 10 4 0 8 GINGER  | 36.4 | 73.3 | 30 | 0    |
| 1971 10 4 6 8 GINGER  | 36.1 | 72.7 | 30 | 0    |
| 1971 10 4 12 8 GINGER | 35.9 | 72.0 | 25 | 0    |
| 1971 10 4 18 8 GINGER | 35.8 | 71.3 | 25 | 0    |
| 1971 10 5 0 8 GINGER  | 35.7 | 70.6 | 25 | 0    |
| 1971 10 5 6 8 GINGER  | 35.7 | 69.9 | 25 | 0    |
| 1971 9 11 0 9 HEIDI   | 27.1 | 72.0 | 30 | 0    |
| 1971 9 11 6 9 HEIDI   | 27.2 | 72.3 | 30 | 0    |
| 1971 9 11 12 9 HEIDI  | 27.5 | 72.8 | 30 | 0    |
| 1971 9 11 18 9 HEIDI  | 27.9 | 73.3 | 30 | 0    |
| 1971 9 12 0 9 HEIDI   | 28.6 | 73.8 | 30 | 1006 |
| 1971 9 12 6 9 HEIDI   | 29.2 | 74.0 | 40 | 0    |
| 1971 9 12 12 9 HEIDI  | 30.0 | 73.9 | 45 | 1001 |
| 1971 9 12 18 9 HEIDI  | 30.8 | 73.5 | 45 | 998  |
| 1971 9 13 0 9 HEIDI   | 31.7 | 72.8 | 45 | 0    |
| 1971 9 13 6 9 HEIDI   | 32.7 | 72.0 | 45 | 0    |
| 1971 9 13 12 9 HEIDI  | 33.8 | 71.3 | 45 | 998  |
| 1971 9 13 18 9 HEIDI  | 35.3 | 70.3 | 50 | 996  |
| 1971 9 14 0 9 HEIDI   | 37.1 | 69.9 | 55 | 0    |
| 1971 9 14 6 9 HEIDI   | 39.4 | 69.3 | 50 | 0    |
| 1971 9 14 12 9 HEIDI  | 41.6 | 68.8 | 50 | 0    |
| 1971 9 14 18 9 HEIDI  | 43.7 | 68.7 | 40 | 998  |
| 1971 9 15 0 9 HEIDI   | 45.5 | 69.0 | 25 | 1002 |
| 1971 9 11 18 10 IRENE | 11.0 | 48.5 | 25 | 1009 |
| 1971 9 12 0 10 IRENE  | 11.3 | 50.3 | 25 | 0    |
| 1971 9 12 6 10 IRENE  | 11.8 | 52.2 | 25 | 0    |
| 1971 9 12 12 10 IRENE | 12.1 | 53.8 | 25 | 1009 |
| 1971 9 12 18 10 IRENE | 12.5 | 55.0 | 25 | 0    |
| 1971 9 13 0 10 IRENE  | 12.5 | 56.5 | 25 | 0    |
| 1971 9 13 6 10 IRENE  | 12.5 | 57.8 | 25 | 0    |
| 1971 9 13 12 10 IRENE | 12.5 | 59.0 | 25 | 0    |
| 1971 9 13 18 10 IRENE | 12.3 | 59.8 | 25 | 0    |
| 1971 9 14 0 10 IRENE  | 12.2 | 60.3 | 25 | 0    |
| 1971 9 14 6 10 IRENE  | 12.1 | 60.8 | 25 | 0    |
| 1971 9 14 12 10 IRENE | 12.0 | 61.4 | 25 | 1007 |
| 1971 9 14 18 10 IRENE | 11.9 | 62.1 | 25 | 0    |
| 1971 9 15 0 10 IRENE  | 11.7 | 63.0 | 30 | 0    |

|      |       |       |        |      |      |    |      |
|------|-------|-------|--------|------|------|----|------|
| 1971 | 9 15  | 6 10  | IRENE  | 11.5 | 64.0 | 30 | 0    |
| 1971 | 9 15  | 12 10 | IRENE  | 11.4 | 65.0 | 30 | 0    |
| 1971 | 9 15  | 18 10 | IRENE  | 11.5 | 66.2 | 30 | 0    |
| 1971 | 9 16  | 0 10  | IRENE  | 11.9 | 67.5 | 30 | 0    |
| 1971 | 9 16  | 6 10  | IRENE  | 12.2 | 69.0 | 30 | 0    |
| 1971 | 9 16  | 12 10 | IRENE  | 12.5 | 70.5 | 30 | 0    |
| 1971 | 9 16  | 18 10 | IRENE  | 12.6 | 71.7 | 30 | 0    |
| 1971 | 9 17  | 0 10  | IRENE  | 12.5 | 73.0 | 35 | 0    |
| 1971 | 9 17  | 6 10  | IRENE  | 12.4 | 74.5 | 35 | 0    |
| 1971 | 9 17  | 12 10 | IRENE  | 12.3 | 76.0 | 40 | 1005 |
| 1971 | 9 17  | 18 10 | IRENE  | 12.1 | 77.5 | 45 | 0    |
| 1971 | 9 18  | 0 10  | IRENE  | 12.0 | 79.0 | 50 | 0    |
| 1971 | 9 18  | 6 10  | IRENE  | 11.7 | 80.5 | 55 | 1002 |
| 1971 | 9 18  | 12 10 | IRENE  | 11.5 | 81.5 | 60 | 0    |
| 1971 | 9 18  | 18 10 | IRENE  | 11.4 | 82.3 | 70 | 993  |
| 1971 | 9 19  | 0 10  | IRENE  | 11.3 | 82.9 | 65 | 989  |
| 1971 | 9 19  | 6 10  | IRENE  | 11.4 | 83.5 | 65 | 0    |
| 1971 | 9 19  | 12 10 | IRENE  | 11.5 | 84.3 | 60 | 0    |
| 1971 | 9 19  | 18 10 | IRENE  | 11.7 | 85.0 | 50 | 0    |
| 1971 | 9 20  | 0 10  | IRENE  | 11.9 | 85.8 | 30 | 0    |
| 1971 | 9 20  | 6 10  | IRENE  | 12.2 | 86.5 | 30 | 0    |
| 1971 | 9 20  | 12 10 | IRENE  | 12.3 | 87.2 | 35 | 0    |
| 1971 | 9 20  | 18 10 | IRENE  | 12.5 | 87.9 | 35 | 0    |
| 1971 | 9 21  | 6 11  | JANICE | 11.5 | 38.8 | 25 | 0    |
| 1971 | 9 21  | 12 11 | JANICE | 11.6 | 40.9 | 25 | 0    |
| 1971 | 9 21  | 18 11 | JANICE | 11.7 | 42.7 | 30 | 0    |
| 1971 | 9 22  | 0 11  | JANICE | 11.8 | 44.3 | 30 | 0    |
| 1971 | 9 22  | 6 11  | JANICE | 12.0 | 45.8 | 40 | 0    |
| 1971 | 9 22  | 12 11 | JANICE | 12.4 | 47.2 | 40 | 1009 |
| 1971 | 9 22  | 18 11 | JANICE | 13.1 | 48.5 | 55 | 1005 |
| 1971 | 9 23  | 0 11  | JANICE | 13.7 | 49.9 | 55 | 0    |
| 1971 | 9 23  | 6 11  | JANICE | 14.4 | 51.2 | 50 | 0    |
| 1971 | 9 23  | 12 11 | JANICE | 15.0 | 52.6 | 50 | 0    |
| 1971 | 9 23  | 18 11 | JANICE | 15.8 | 53.9 | 45 | 0    |
| 1971 | 9 24  | 0 11  | JANICE | 16.3 | 55.2 | 45 | 0    |
| 1971 | 9 24  | 6 11  | JANICE | 17.1 | 57.0 | 35 | 1006 |
| 1971 | 9 24  | 12 11 | JANICE | 18.1 | 58.6 | 30 | 0    |
| 1971 | 9 24  | 18 11 | JANICE | 19.4 | 60.0 | 30 | 0    |
| 1971 | 10 18 | 0 12  | KRISTY | 25.0 | 58.5 | 25 | 0    |
| 1971 | 10 18 | 6 12  | KRISTY | 26.0 | 58.0 | 25 | 0    |
| 1971 | 10 18 | 12 12 | KRISTY | 27.0 | 57.6 | 25 | 0    |
| 1971 | 10 18 | 18 12 | KRISTY | 28.0 | 57.3 | 25 | 1009 |
| 1971 | 10 19 | 0 12  | KRISTY | 29.1 | 57.1 | 25 | 1009 |
| 1971 | 10 19 | 6 12  | KRISTY | 30.0 | 56.8 | 25 | 0    |

|                         |      |      |    |      |
|-------------------------|------|------|----|------|
| 1971 10 19 12 12 KRISTY | 31.1 | 56.3 | 25 | 0    |
| 1971 10 19 18 12 KRISTY | 32.5 | 54.7 | 30 | 1009 |
| 1971 10 20 0 12 KRISTY  | 33.5 | 52.8 | 35 | 0    |
| 1971 10 20 6 12 KRISTY  | 34.8 | 49.8 | 35 | 0    |
| 1971 10 20 12 12 KRISTY | 35.4 | 47.1 | 45 | 997  |
| 1971 10 20 18 12 KRISTY | 36.4 | 42.9 | 45 | 992  |
| 1971 10 21 0 12 KRISTY  | 36.7 | 38.3 | 40 | 0    |
| 1971 10 21 6 12 KRISTY  | 37.0 | 34.6 | 40 | 0    |
| 1971 10 21 12 12 KRISTY | 38.2 | 30.8 | 40 | 0    |
| 1971 10 21 18 12 KRISTY | 40.5 | 28.9 | 40 | 0    |
| 1971 11 12 12 13 LAURA  | 12.0 | 78.5 | 25 | 0    |
| 1971 11 12 18 13 LAURA  | 12.3 | 78.8 | 30 | 0    |
| 1971 11 13 0 13 LAURA   | 12.7 | 79.0 | 30 | 0    |
| 1971 11 13 6 13 LAURA   | 13.3 | 79.6 | 30 | 0    |
| 1971 11 13 12 13 LAURA  | 13.8 | 80.0 | 30 | 0    |
| 1971 11 13 18 13 LAURA  | 14.5 | 80.6 | 30 | 0    |
| 1971 11 14 0 13 LAURA   | 15.2 | 81.3 | 30 | 0    |
| 1971 11 14 6 13 LAURA   | 16.0 | 82.0 | 30 | 0    |
| 1971 11 14 12 13 LAURA  | 16.6 | 82.5 | 35 | 1004 |
| 1971 11 14 18 13 LAURA  | 17.4 | 83.2 | 40 | 0    |
| 1971 11 15 0 13 LAURA   | 18.2 | 83.6 | 40 | 0    |
| 1971 11 15 6 13 LAURA   | 19.0 | 83.8 | 45 | 0    |
| 1971 11 15 12 13 LAURA  | 19.8 | 84.0 | 55 | 0    |
| 1971 11 15 18 13 LAURA  | 20.4 | 84.1 | 60 | 0    |
| 1971 11 16 0 13 LAURA   | 21.0 | 84.0 | 60 | 998  |
| 1971 11 16 6 13 LAURA   | 21.4 | 83.8 | 60 | 0    |
| 1971 11 16 12 13 LAURA  | 21.7 | 83.5 | 60 | 0    |
| 1971 11 16 18 13 LAURA  | 21.4 | 83.4 | 60 | 0    |
| 1971 11 17 0 13 LAURA   | 21.1 | 83.3 | 60 | 995  |
| 1971 11 17 6 13 LAURA   | 20.5 | 83.5 | 60 | 0    |
| 1971 11 17 12 13 LAURA  | 20.1 | 83.9 | 60 | 994  |
| 1971 11 17 18 13 LAURA  | 19.9 | 84.2 | 60 | 996  |
| 1971 11 18 0 13 LAURA   | 19.7 | 84.4 | 55 | 0    |
| 1971 11 18 6 13 LAURA   | 19.8 | 84.7 | 50 | 1000 |
| 1971 11 18 12 13 LAURA  | 19.9 | 85.0 | 50 | 0    |
| 1971 11 18 18 13 LAURA  | 19.9 | 85.2 | 50 | 1001 |
| 1971 11 19 0 13 LAURA   | 19.7 | 85.5 | 50 | 1003 |
| 1971 11 19 6 13 LAURA   | 19.4 | 85.5 | 45 | 0    |
| 1971 11 19 12 13 LAURA  | 19.1 | 85.5 | 45 | 0    |
| 1971 11 19 18 13 LAURA  | 18.6 | 85.7 | 45 | 1000 |
| 1971 11 20 0 13 LAURA   | 18.2 | 86.1 | 40 | 0    |
| 1971 11 20 6 13 LAURA   | 17.9 | 86.5 | 50 | 1000 |
| 1971 11 20 12 13 LAURA  | 17.6 | 87.2 | 55 | 1000 |
| 1971 11 20 18 13 LAURA  | 17.2 | 87.7 | 60 | 997  |

|                        |      |      |    |      |
|------------------------|------|------|----|------|
| 1971 11 21 0 13 LAURA  | 16.7 | 88.2 | 60 | 997  |
| 1971 11 21 6 13 LAURA  | 16.3 | 88.6 | 60 | 0    |
| 1971 11 21 12 13 LAURA | 16.0 | 89.0 | 60 | 0    |
| 1971 11 21 18 13 LAURA | 15.7 | 89.4 | 60 | 0    |
| 1971 11 22 0 13 LAURA  | 15.3 | 90.0 | 30 | 0    |
| 1972 5 23 18 1 ALPHA   | 31.2 | 78.2 | 25 | 1004 |
| 1972 5 24 0 1 ALPHA    | 31.7 | 77.0 | 30 | 0    |
| 1972 5 24 6 1 ALPHA    | 32.2 | 76.6 | 30 | 1003 |
| 1972 5 24 12 1 ALPHA   | 32.9 | 76.2 | 30 | 0    |
| 1972 5 24 18 1 ALPHA   | 33.5 | 75.7 | 30 | 0    |
| 1972 5 25 0 1 ALPHA    | 34.0 | 75.4 | 30 | 1004 |
| 1972 5 25 6 1 ALPHA    | 34.3 | 75.1 | 30 | 0    |
| 1972 5 25 12 1 ALPHA   | 34.4 | 74.6 | 30 | 0    |
| 1972 5 25 18 1 ALPHA   | 34.2 | 74.1 | 30 | 0    |
| 1972 5 26 0 1 ALPHA    | 34.0 | 73.5 | 45 | 0    |
| 1972 5 26 6 1 ALPHA    | 32.5 | 74.6 | 50 | 0    |
| 1972 5 26 12 1 ALPHA   | 31.6 | 75.7 | 60 | 1001 |
| 1972 5 26 18 1 ALPHA   | 31.4 | 75.9 | 55 | 0    |
| 1972 5 27 0 1 ALPHA    | 31.2 | 76.2 | 50 | 0    |
| 1972 5 27 6 1 ALPHA    | 30.8 | 77.1 | 45 | 0    |
| 1972 5 27 12 1 ALPHA   | 30.6 | 78.4 | 55 | 0    |
| 1972 5 27 18 1 ALPHA   | 30.8 | 80.1 | 50 | 991  |
| 1972 5 28 0 1 ALPHA    | 31.0 | 81.7 | 30 | 0    |
| 1972 5 28 6 1 ALPHA    | 30.5 | 83.0 | 30 | 1011 |
| 1972 5 28 12 1 ALPHA   | 29.8 | 84.0 | 30 | 1012 |
| 1972 5 28 18 1 ALPHA   | 29.2 | 84.7 | 30 | 1013 |
| 1972 5 29 0 1 ALPHA    | 28.8 | 85.0 | 25 | 0    |
| 1972 5 29 6 1 ALPHA    | 28.4 | 85.2 | 25 | 0    |
| 1972 5 29 12 1 ALPHA   | 27.8 | 85.5 | 25 | 1013 |
| 1972 6 14 12 2 AGNES   | 20.0 | 89.0 | 25 | 0    |
| 1972 6 14 18 2 AGNES   | 20.0 | 88.7 | 25 | 0    |
| 1972 6 15 0 2 AGNES    | 20.0 | 88.4 | 25 | 0    |
| 1972 6 15 6 2 AGNES    | 20.0 | 88.1 | 25 | 0    |
| 1972 6 15 12 2 AGNES   | 20.0 | 87.8 | 25 | 0    |
| 1972 6 15 18 2 AGNES   | 20.0 | 87.4 | 30 | 0    |
| 1972 6 16 0 2 AGNES    | 20.0 | 87.0 | 30 | 1001 |
| 1972 6 16 6 2 AGNES    | 20.0 | 86.6 | 30 | 0    |
| 1972 6 16 12 2 AGNES   | 20.0 | 86.2 | 40 | 998  |
| 1972 6 16 18 2 AGNES   | 20.2 | 85.8 | 45 | 0    |
| 1972 6 17 0 2 AGNES    | 20.5 | 85.5 | 50 | 0    |
| 1972 6 17 6 2 AGNES    | 20.9 | 85.3 | 50 | 0    |
| 1972 6 17 12 2 AGNES   | 21.4 | 85.2 | 50 | 0    |
| 1972 6 17 18 2 AGNES   | 21.9 | 85.3 | 55 | 0    |
| 1972 6 18 0 2 AGNES    | 22.4 | 85.4 | 60 | 0    |

|      |      |    |   |       |      |      |    |      |
|------|------|----|---|-------|------|------|----|------|
| 1972 | 6 18 | 6  | 2 | AGNES | 23.0 | 85.5 | 60 | 0    |
| 1972 | 6 18 | 12 | 2 | AGNES | 23.8 | 85.6 | 65 | 986  |
| 1972 | 6 18 | 18 | 2 | AGNES | 24.8 | 85.7 | 65 | 983  |
| 1972 | 6 19 | 0  | 2 | AGNES | 26.0 | 85.7 | 75 | 982  |
| 1972 | 6 19 | 6  | 2 | AGNES | 27.2 | 85.7 | 75 | 978  |
| 1972 | 6 19 | 12 | 2 | AGNES | 28.5 | 85.7 | 75 | 978  |
| 1972 | 6 19 | 18 | 2 | AGNES | 29.6 | 85.6 | 65 | 983  |
| 1972 | 6 20 | 0  | 2 | AGNES | 30.5 | 85.2 | 45 | 0    |
| 1972 | 6 20 | 6  | 2 | AGNES | 31.4 | 84.7 | 30 | 990  |
| 1972 | 6 20 | 12 | 2 | AGNES | 32.2 | 83.8 | 30 | 0    |
| 1972 | 6 20 | 18 | 2 | AGNES | 32.9 | 82.8 | 30 | 992  |
| 1972 | 6 21 | 0  | 2 | AGNES | 33.5 | 81.7 | 30 | 992  |
| 1972 | 6 21 | 6  | 2 | AGNES | 33.8 | 80.2 | 30 | 0    |
| 1972 | 6 21 | 12 | 2 | AGNES | 34.4 | 79.0 | 30 | 990  |
| 1972 | 6 21 | 18 | 2 | AGNES | 35.2 | 77.6 | 40 | 988  |
| 1972 | 6 22 | 0  | 2 | AGNES | 35.8 | 75.7 | 45 | 0    |
| 1972 | 6 22 | 6  | 2 | AGNES | 36.9 | 74.3 | 50 | 0    |
| 1972 | 6 22 | 12 | 2 | AGNES | 38.2 | 73.1 | 60 | 977  |
| 1972 | 6 22 | 18 | 2 | AGNES | 40.2 | 73.4 | 55 | 980  |
| 1972 | 6 23 | 0  | 2 | AGNES | 41.7 | 74.5 | 45 | 0    |
| 1972 | 8 22 | 12 | 3 | BETTY | 36.5 | 64.0 | 30 | 0    |
| 1972 | 8 22 | 18 | 3 | BETTY | 37.0 | 62.5 | 30 | 0    |
| 1972 | 8 23 | 0  | 3 | BETTY | 37.5 | 61.0 | 30 | 0    |
| 1972 | 8 23 | 6  | 3 | BETTY | 37.5 | 59.5 | 30 | 0    |
| 1972 | 8 23 | 12 | 3 | BETTY | 37.5 | 58.0 | 30 | 0    |
| 1972 | 8 23 | 18 | 3 | BETTY | 37.3 | 56.8 | 30 | 0    |
| 1972 | 8 24 | 0  | 3 | BETTY | 37.2 | 56.2 | 35 | 0    |
| 1972 | 8 24 | 6  | 3 | BETTY | 37.2 | 55.5 | 35 | 0    |
| 1972 | 8 24 | 12 | 3 | BETTY | 37.2 | 54.8 | 35 | 0    |
| 1972 | 8 24 | 18 | 3 | BETTY | 37.3 | 54.3 | 35 | 0    |
| 1972 | 8 25 | 0  | 3 | BETTY | 37.3 | 53.8 | 35 | 0    |
| 1972 | 8 25 | 6  | 3 | BETTY | 37.3 | 53.5 | 40 | 0    |
| 1972 | 8 25 | 12 | 3 | BETTY | 37.3 | 53.3 | 45 | 997  |
| 1972 | 8 25 | 18 | 3 | BETTY | 37.2 | 53.1 | 45 | 1002 |
| 1972 | 8 26 | 0  | 3 | BETTY | 37.4 | 52.9 | 55 | 992  |
| 1972 | 8 26 | 6  | 3 | BETTY | 37.7 | 52.7 | 55 | 0    |
| 1972 | 8 26 | 12 | 3 | BETTY | 38.0 | 52.4 | 55 | 998  |
| 1972 | 8 26 | 18 | 3 | BETTY | 38.3 | 52.0 | 55 | 998  |
| 1972 | 8 27 | 0  | 3 | BETTY | 38.5 | 51.0 | 60 | 0    |
| 1972 | 8 27 | 6  | 3 | BETTY | 38.5 | 49.0 | 60 | 0    |
| 1972 | 8 27 | 12 | 3 | BETTY | 38.8 | 46.6 | 80 | 987  |
| 1972 | 8 27 | 18 | 3 | BETTY | 40.0 | 44.6 | 85 | 0    |
| 1972 | 8 28 | 0  | 3 | BETTY | 40.5 | 42.6 | 90 | 976  |
| 1972 | 8 28 | 6  | 3 | BETTY | 40.9 | 40.7 | 85 | 0    |

|      |         |          |      |      |    |      |
|------|---------|----------|------|------|----|------|
| 1972 | 8 28 12 | 3 BETTY  | 41.1 | 39.9 | 85 | 977  |
| 1972 | 8 28 18 | 3 BETTY  | 41.2 | 37.0 | 85 | 978  |
| 1972 | 8 29 0  | 3 BETTY  | 41.0 | 35.7 | 85 | 981  |
| 1972 | 8 29 6  | 3 BETTY  | 41.2 | 34.6 | 85 | 982  |
| 1972 | 8 29 12 | 3 BETTY  | 41.6 | 33.4 | 85 | 986  |
| 1972 | 8 29 18 | 3 BETTY  | 41.7 | 32.5 | 80 | 989  |
| 1972 | 8 30 0  | 3 BETTY  | 41.6 | 32.2 | 75 | 989  |
| 1972 | 8 30 6  | 3 BETTY  | 41.5 | 32.1 | 75 | 989  |
| 1972 | 8 30 12 | 3 BETTY  | 41.2 | 32.2 | 70 | 996  |
| 1972 | 8 30 18 | 3 BETTY  | 40.9 | 32.6 | 65 | 999  |
| 1972 | 8 31 0  | 3 BETTY  | 40.6 | 34.0 | 55 | 1002 |
| 1972 | 8 31 6  | 3 BETTY  | 40.7 | 35.4 | 45 | 1006 |
| 1972 | 8 31 12 | 3 BETTY  | 41.1 | 36.8 | 40 | 1006 |
| 1972 | 8 31 18 | 3 BETTY  | 41.9 | 37.8 | 40 | 1008 |
| 1972 | 9 1 0   | 3 BETTY  | 42.9 | 38.0 | 35 | 0    |
| 1972 | 9 1 6   | 3 BETTY  | 44.0 | 38.1 | 40 | 0    |
| 1972 | 9 1 12  | 3 BETTY  | 45.1 | 37.9 | 45 | 999  |
| 1972 | 9 1 18  | 3 BETTY  | 46.2 | 37.9 | 50 | 0    |
| 1972 | 8 29 12 | 4 CARRIE | 29.0 | 78.5 | 30 | 1012 |
| 1972 | 8 29 18 | 4 CARRIE | 29.8 | 77.2 | 30 | 0    |
| 1972 | 8 30 0  | 4 CARRIE | 30.5 | 76.0 | 30 | 0    |
| 1972 | 8 30 6  | 4 CARRIE | 31.0 | 75.0 | 30 | 0    |
| 1972 | 8 30 12 | 4 CARRIE | 31.5 | 74.0 | 30 | 0    |
| 1972 | 8 30 18 | 4 CARRIE | 32.0 | 73.0 | 30 | 0    |
| 1972 | 8 31 0  | 4 CARRIE | 32.5 | 72.0 | 35 | 0    |
| 1972 | 8 31 6  | 4 CARRIE | 33.0 | 71.2 | 40 | 0    |
| 1972 | 8 31 12 | 4 CARRIE | 33.5 | 70.5 | 45 | 0    |
| 1972 | 8 31 18 | 4 CARRIE | 33.8 | 69.7 | 50 | 1002 |
| 1972 | 9 1 0   | 4 CARRIE | 34.3 | 69.3 | 50 | 0    |
| 1972 | 9 1 6   | 4 CARRIE | 34.5 | 69.0 | 50 | 0    |
| 1972 | 9 1 12  | 4 CARRIE | 35.0 | 69.0 | 50 | 0    |
| 1972 | 9 1 18  | 4 CARRIE | 35.2 | 69.0 | 45 | 0    |
| 1972 | 9 2 0   | 4 CARRIE | 35.5 | 69.2 | 40 | 0    |
| 1972 | 9 2 6   | 4 CARRIE | 36.2 | 70.1 | 35 | 0    |
| 1972 | 9 2 12  | 4 CARRIE | 36.9 | 70.9 | 40 | 1007 |
| 1972 | 9 2 18  | 4 CARRIE | 37.4 | 71.0 | 40 | 0    |
| 1972 | 9 3 0   | 4 CARRIE | 37.9 | 71.2 | 45 | 1002 |
| 1972 | 9 3 6   | 4 CARRIE | 38.8 | 71.1 | 50 | 0    |
| 1972 | 9 3 12  | 4 CARRIE | 39.7 | 70.8 | 55 | 0    |
| 1972 | 9 3 18  | 4 CARRIE | 40.6 | 70.2 | 60 | 993  |
| 1972 | 9 4 0   | 4 CARRIE | 41.5 | 69.5 | 55 | 992  |
| 1972 | 9 4 6   | 4 CARRIE | 42.8 | 68.5 | 50 | 0    |
| 1972 | 9 4 12  | 4 CARRIE | 44.8 | 67.5 | 50 | 0    |
| 1972 | 9 4 18  | 4 CARRIE | 45.7 | 66.5 | 45 | 0    |

|      |   |    |    |   |         |      |      |    |      |
|------|---|----|----|---|---------|------|------|----|------|
| 1972 | 9 | 5  | 0  | 4 | CARRIE  | 46.5 | 65.5 | 40 | 1005 |
| 1972 | 9 | 5  | 6  | 4 | CARRIE  | 46.8 | 64.5 | 40 | 0    |
| 1972 | 9 | 5  | 12 | 4 | CARRIE  | 47.0 | 63.0 | 40 | 0    |
| 1972 | 9 | 5  | 0  | 5 | DAWN    | 23.8 | 79.4 | 30 | 0    |
| 1972 | 9 | 5  | 6  | 5 | DAWN    | 24.3 | 80.0 | 30 | 0    |
| 1972 | 9 | 5  | 12 | 5 | DAWN    | 24.9 | 80.4 | 30 | 0    |
| 1972 | 9 | 5  | 18 | 5 | DAWN    | 25.6 | 80.5 | 30 | 1007 |
| 1972 | 9 | 6  | 0  | 5 | DAWN    | 26.2 | 79.9 | 30 | 0    |
| 1972 | 9 | 6  | 6  | 5 | DAWN    | 26.8 | 79.0 | 30 | 0    |
| 1972 | 9 | 6  | 12 | 5 | DAWN    | 27.3 | 77.9 | 40 | 0    |
| 1972 | 9 | 6  | 18 | 5 | DAWN    | 28.2 | 76.0 | 50 | 1005 |
| 1972 | 9 | 7  | 0  | 5 | DAWN    | 29.2 | 74.4 | 55 | 0    |
| 1972 | 9 | 7  | 6  | 5 | DAWN    | 30.2 | 72.8 | 55 | 1001 |
| 1972 | 9 | 7  | 12 | 5 | DAWN    | 32.0 | 71.2 | 60 | 0    |
| 1972 | 9 | 7  | 18 | 5 | DAWN    | 33.8 | 70.4 | 65 | 0    |
| 1972 | 9 | 8  | 0  | 5 | DAWN    | 35.2 | 70.8 | 70 | 998  |
| 1972 | 9 | 8  | 6  | 5 | DAWN    | 36.0 | 71.5 | 70 | 0    |
| 1972 | 9 | 8  | 12 | 5 | DAWN    | 36.4 | 72.4 | 70 | 997  |
| 1972 | 9 | 8  | 18 | 5 | DAWN    | 36.6 | 73.5 | 65 | 0    |
| 1972 | 9 | 9  | 0  | 5 | DAWN    | 36.1 | 74.2 | 60 | 1000 |
| 1972 | 9 | 9  | 6  | 5 | DAWN    | 35.6 | 74.5 | 50 | 0    |
| 1972 | 9 | 9  | 12 | 5 | DAWN    | 35.0 | 74.2 | 45 | 1005 |
| 1972 | 9 | 9  | 18 | 5 | DAWN    | 34.8 | 73.9 | 45 | 0    |
| 1972 | 9 | 10 | 0  | 5 | DAWN    | 34.1 | 73.0 | 45 | 0    |
| 1972 | 9 | 10 | 6  | 5 | DAWN    | 33.4 | 72.2 | 45 | 0    |
| 1972 | 9 | 10 | 12 | 5 | DAWN    | 32.9 | 71.9 | 45 | 0    |
| 1972 | 9 | 10 | 18 | 5 | DAWN    | 32.0 | 71.8 | 45 | 0    |
| 1972 | 9 | 11 | 0  | 5 | DAWN    | 31.2 | 72.1 | 45 | 0    |
| 1972 | 9 | 11 | 6  | 5 | DAWN    | 30.7 | 73.1 | 40 | 1007 |
| 1972 | 9 | 11 | 12 | 5 | DAWN    | 30.2 | 74.1 | 40 | 0    |
| 1972 | 9 | 11 | 18 | 5 | DAWN    | 30.1 | 75.1 | 40 | 0    |
| 1972 | 9 | 12 | 0  | 5 | DAWN    | 30.1 | 76.2 | 40 | 0    |
| 1972 | 9 | 12 | 6  | 5 | DAWN    | 30.2 | 77.1 | 35 | 1014 |
| 1972 | 9 | 12 | 12 | 5 | DAWN    | 30.7 | 78.0 | 35 | 0    |
| 1972 | 9 | 12 | 18 | 5 | DAWN    | 31.0 | 78.8 | 30 | 0    |
| 1972 | 9 | 13 | 0  | 5 | DAWN    | 30.8 | 79.7 | 30 | 0    |
| 1972 | 9 | 13 | 6  | 5 | DAWN    | 30.8 | 80.6 | 30 | 0    |
| 1972 | 9 | 13 | 12 | 5 | DAWN    | 31.1 | 81.0 | 30 | 0    |
| 1972 | 9 | 13 | 18 | 5 | DAWN    | 31.7 | 81.0 | 30 | 0    |
| 1972 | 9 | 14 | 0  | 5 | DAWN    | 31.9 | 80.6 | 30 | 0    |
| 1972 | 9 | 14 | 6  | 5 | DAWN    | 32.4 | 80.0 | 30 | 0    |
| 1972 | 9 | 14 | 12 | 5 | DAWN    | 32.8 | 79.5 | 30 | 0    |
| 1972 | 9 | 19 | 12 | 6 | CHARLIE | 37.5 | 59.5 | 25 | 0    |
| 1972 | 9 | 19 | 18 | 6 | CHARLIE | 38.5 | 59.3 | 30 | 1008 |



|      |    |    |    |   |         |      |      |    |      |
|------|----|----|----|---|---------|------|------|----|------|
| 1972 | 9  | 20 | 0  | 6 | CHARLIE | 39.5 | 59.0 | 35 | 0    |
| 1972 | 9  | 20 | 6  | 6 | CHARLIE | 40.0 | 57.5 | 40 | 0    |
| 1972 | 9  | 20 | 12 | 6 | CHARLIE | 40.7 | 54.2 | 50 | 1001 |
| 1972 | 9  | 20 | 18 | 6 | CHARLIE | 41.7 | 49.8 | 50 | 0    |
| 1972 | 9  | 21 | 0  | 6 | CHARLIE | 42.8 | 45.4 | 55 | 0    |
| 1972 | 9  | 21 | 6  | 6 | CHARLIE | 46.0 | 40.0 | 60 | 992  |
| 1972 | 9  | 21 | 12 | 6 | CHARLIE | 49.5 | 37.0 | 60 | 0    |
| 1972 | 9  | 21 | 18 | 6 | CHARLIE | 52.0 | 36.0 | 60 | 944  |
| 1972 | 9  | 22 | 0  | 6 | CHARLIE | 54.0 | 36.0 | 60 | 0    |
| 1972 | 11 | 1  | 18 | 7 | DELTA   | 35.0 | 47.5 | 25 | 1013 |
| 1972 | 11 | 2  | 0  | 7 | DELTA   | 34.7 | 48.0 | 35 | 0    |
| 1972 | 11 | 2  | 6  | 7 | DELTA   | 34.4 | 48.3 | 35 | 0    |
| 1972 | 11 | 2  | 12 | 7 | DELTA   | 34.2 | 48.6 | 40 | 1003 |
| 1972 | 11 | 2  | 18 | 7 | DELTA   | 33.8 | 48.9 | 40 | 0    |
| 1972 | 11 | 3  | 0  | 7 | DELTA   | 33.5 | 49.2 | 40 | 1001 |
| 1972 | 11 | 3  | 6  | 7 | DELTA   | 32.7 | 49.8 | 40 | 0    |
| 1972 | 11 | 3  | 12 | 7 | DELTA   | 32.0 | 50.0 | 40 | 1003 |
| 1972 | 11 | 3  | 18 | 7 | DELTA   | 31.0 | 50.1 | 40 | 0    |
| 1972 | 11 | 4  | 0  | 7 | DELTA   | 30.0 | 49.7 | 40 | 1003 |
| 1972 | 11 | 4  | 6  | 7 | DELTA   | 29.8 | 48.6 | 40 | 0    |
| 1972 | 11 | 4  | 12 | 7 | DELTA   | 29.7 | 47.6 | 35 | 1005 |
| 1972 | 11 | 4  | 18 | 7 | DELTA   | 29.8 | 46.9 | 35 | 0    |
| 1972 | 11 | 5  | 0  | 7 | DELTA   | 30.1 | 46.3 | 30 | 1006 |
| 1972 | 11 | 5  | 6  | 7 | DELTA   | 30.2 | 45.6 | 30 | 0    |
| 1972 | 11 | 5  | 12 | 7 | DELTA   | 30.3 | 45.0 | 30 | 1008 |
| 1972 | 11 | 5  | 18 | 7 | DELTA   | 30.3 | 44.0 | 30 | 0    |
| 1972 | 11 | 6  | 0  | 7 | DELTA   | 30.3 | 43.0 | 25 | 1008 |
| 1972 | 11 | 6  | 6  | 7 | DELTA   | 30.3 | 42.5 | 25 | 0    |
| 1972 | 11 | 6  | 12 | 7 | DELTA   | 30.3 | 42.1 | 25 | 1010 |
| 1972 | 11 | 6  | 18 | 7 | DELTA   | 30.7 | 42.0 | 25 | 0    |
| 1972 | 11 | 7  | 0  | 7 | DELTA   | 31.0 | 42.0 | 25 | 1011 |
| 1972 | 11 | 7  | 6  | 7 | DELTA   | 31.2 | 42.1 | 25 | 0    |
| 1972 | 11 | 7  | 12 | 7 | DELTA   | 31.3 | 42.1 | 25 | 1011 |
| 1972 | 11 | 7  | 18 | 7 | DELTA   | 32.5 | 42.5 | 25 | 0    |
| 1973 | 7  | 1  | 18 | 1 | ALICE   | 26.0 | 67.8 | 30 | 1006 |
| 1973 | 7  | 2  | 0  | 1 | ALICE   | 26.3 | 67.5 | 30 | 1006 |
| 1973 | 7  | 2  | 6  | 1 | ALICE   | 26.5 | 67.2 | 30 | 0    |
| 1973 | 7  | 2  | 12 | 1 | ALICE   | 26.8 | 66.8 | 30 | 0    |
| 1973 | 7  | 2  | 18 | 1 | ALICE   | 27.4 | 66.4 | 30 | 1005 |
| 1973 | 7  | 3  | 0  | 1 | ALICE   | 27.8 | 66.0 | 40 | 0    |
| 1973 | 7  | 3  | 6  | 1 | ALICE   | 28.8 | 65.6 | 50 | 0    |
| 1973 | 7  | 3  | 12 | 1 | ALICE   | 29.8 | 65.5 | 60 | 1000 |
| 1973 | 7  | 3  | 18 | 1 | ALICE   | 30.6 | 65.4 | 65 | 0    |
| 1973 | 7  | 4  | 0  | 1 | ALICE   | 31.4 | 65.3 | 65 | 0    |

|      |   |    |    |   |           |      |      |    |      |
|------|---|----|----|---|-----------|------|------|----|------|
| 1973 | 7 | 4  | 6  | 1 | ALICE     | 32.3 | 65.1 | 70 | 986  |
| 1973 | 7 | 4  | 12 | 1 | ALICE     | 33.1 | 65.1 | 80 | 990  |
| 1973 | 7 | 4  | 18 | 1 | ALICE     | 34.0 | 65.1 | 80 | 0    |
| 1973 | 7 | 5  | 0  | 1 | ALICE     | 34.9 | 64.9 | 70 | 0    |
| 1973 | 7 | 5  | 6  | 1 | ALICE     | 35.8 | 64.7 | 65 | 0    |
| 1973 | 7 | 5  | 12 | 1 | ALICE     | 36.9 | 64.3 | 65 | 0    |
| 1973 | 7 | 5  | 18 | 1 | ALICE     | 38.3 | 63.9 | 65 | 0    |
| 1973 | 7 | 6  | 0  | 1 | ALICE     | 40.3 | 62.9 | 65 | 995  |
| 1973 | 7 | 6  | 6  | 1 | ALICE     | 42.5 | 61.6 | 60 | 0    |
| 1973 | 7 | 6  | 12 | 1 | ALICE     | 45.0 | 60.0 | 60 | 991  |
| 1973 | 7 | 6  | 18 | 1 | ALICE     | 48.3 | 58.8 | 50 | 0    |
| 1973 | 7 | 7  | 0  | 1 | ALICE     | 52.0 | 56.5 | 45 | 0    |
| 1973 | 7 | 30 | 12 | 2 | ALFA      | 32.6 | 74.1 | 25 | 1013 |
| 1973 | 7 | 30 | 18 | 2 | ALFA      | 33.8 | 73.3 | 30 | 0    |
| 1973 | 7 | 31 | 0  | 2 | ALFA      | 35.0 | 72.5 | 35 | 0    |
| 1973 | 7 | 31 | 6  | 2 | ALFA      | 36.3 | 71.7 | 35 | 0    |
| 1973 | 7 | 31 | 12 | 2 | ALFA      | 37.5 | 70.8 | 40 | 0    |
| 1973 | 7 | 31 | 18 | 2 | ALFA      | 38.5 | 70.2 | 35 | 1005 |
| 1973 | 8 | 1  | 0  | 2 | ALFA      | 39.6 | 69.7 | 35 | 1006 |
| 1973 | 8 | 1  | 6  | 2 | ALFA      | 40.5 | 69.4 | 30 | 0    |
| 1973 | 8 | 1  | 12 | 2 | ALFA      | 41.5 | 69.1 | 25 | 1007 |
| 1973 | 8 | 1  | 18 | 2 | ALFA      | 42.7 | 68.8 | 25 | 1008 |
| 1973 | 8 | 2  | 0  | 2 | ALFA      | 44.0 | 68.0 | 25 | 1010 |
| 1973 | 8 | 18 | 6  | 3 | BRENDA    | 20.5 | 83.7 | 30 | 0    |
| 1973 | 8 | 18 | 12 | 3 | BRENDA    | 21.0 | 84.8 | 30 | 1007 |
| 1973 | 8 | 18 | 18 | 3 | BRENDA    | 21.2 | 86.0 | 35 | 0    |
| 1973 | 8 | 19 | 0  | 3 | BRENDA    | 21.3 | 86.9 | 50 | 992  |
| 1973 | 8 | 19 | 6  | 3 | BRENDA    | 21.3 | 87.6 | 55 | 0    |
| 1973 | 8 | 19 | 12 | 3 | BRENDA    | 21.2 | 88.3 | 55 | 0    |
| 1973 | 8 | 19 | 18 | 3 | BRENDA    | 21.2 | 89.0 | 50 | 0    |
| 1973 | 8 | 20 | 0  | 3 | BRENDA    | 21.1 | 89.6 | 45 | 996  |
| 1973 | 8 | 20 | 6  | 3 | BRENDA    | 20.7 | 90.5 | 45 | 0    |
| 1973 | 8 | 20 | 12 | 3 | BRENDA    | 20.3 | 91.2 | 45 | 0    |
| 1973 | 8 | 20 | 18 | 3 | BRENDA    | 19.8 | 91.7 | 65 | 0    |
| 1973 | 8 | 21 | 0  | 3 | BRENDA    | 19.4 | 91.9 | 70 | 977  |
| 1973 | 8 | 21 | 6  | 3 | BRENDA    | 19.0 | 92.1 | 80 | 0    |
| 1973 | 8 | 21 | 12 | 3 | BRENDA    | 18.4 | 92.3 | 60 | 0    |
| 1973 | 8 | 21 | 18 | 3 | BRENDA    | 17.6 | 92.1 | 40 | 0    |
| 1973 | 8 | 22 | 0  | 3 | BRENDA    | 17.2 | 91.5 | 30 | 0    |
| 1973 | 8 | 25 | 12 | 4 | CHRISTINE | 11.0 | 14.0 | 30 | 0    |
| 1973 | 8 | 25 | 18 | 4 | CHRISTINE | 10.9 | 15.2 | 30 | 0    |
| 1973 | 8 | 26 | 0  | 4 | CHRISTINE | 10.8 | 16.4 | 30 | 0    |
| 1973 | 8 | 26 | 6  | 4 | CHRISTINE | 10.7 | 17.7 | 30 | 0    |
| 1973 | 8 | 26 | 12 | 4 | CHRISTINE | 10.5 | 19.0 | 30 | 0    |

|      |         |   |           |      |      |    |      |
|------|---------|---|-----------|------|------|----|------|
| 1973 | 8 26 18 | 4 | CHRISTINE | 10.5 | 20.5 | 30 | 0    |
| 1973 | 8 27 0  | 4 | CHRISTINE | 10.5 | 22.0 | 30 | 0    |
| 1973 | 8 27 6  | 4 | CHRISTINE | 10.5 | 23.0 | 30 | 0    |
| 1973 | 8 27 12 | 4 | CHRISTINE | 10.5 | 24.0 | 30 | 0    |
| 1973 | 8 27 18 | 4 | CHRISTINE | 10.5 | 25.5 | 30 | 0    |
| 1973 | 8 28 0  | 4 | CHRISTINE | 10.5 | 27.0 | 30 | 0    |
| 1973 | 8 28 6  | 4 | CHRISTINE | 10.5 | 28.5 | 30 | 0    |
| 1973 | 8 28 12 | 4 | CHRISTINE | 10.5 | 30.0 | 40 | 0    |
| 1973 | 8 28 18 | 4 | CHRISTINE | 10.4 | 31.8 | 40 | 0    |
| 1973 | 8 29 0  | 4 | CHRISTINE | 10.3 | 33.5 | 40 | 0    |
| 1973 | 8 29 6  | 4 | CHRISTINE | 10.3 | 35.3 | 40 | 0    |
| 1973 | 8 29 12 | 4 | CHRISTINE | 10.2 | 37.0 | 40 | 0    |
| 1973 | 8 29 18 | 4 | CHRISTINE | 10.2 | 38.4 | 40 | 0    |
| 1973 | 8 30 0  | 4 | CHRISTINE | 10.1 | 39.8 | 40 | 0    |
| 1973 | 8 30 6  | 4 | CHRISTINE | 10.1 | 40.8 | 40 | 0    |
| 1973 | 8 30 12 | 4 | CHRISTINE | 10.0 | 41.8 | 45 | 0    |
| 1973 | 8 30 18 | 4 | CHRISTINE | 10.4 | 43.0 | 45 | 0    |
| 1973 | 8 31 0  | 4 | CHRISTINE | 10.8 | 44.3 | 45 | 1007 |
| 1973 | 8 31 6  | 4 | CHRISTINE | 11.2 | 45.3 | 50 | 0    |
| 1973 | 8 31 12 | 4 | CHRISTINE | 11.8 | 46.4 | 50 | 0    |
| 1973 | 8 31 18 | 4 | CHRISTINE | 12.5 | 47.8 | 50 | 1003 |
| 1973 | 9 1 0   | 4 | CHRISTINE | 13.2 | 49.2 | 50 | 0    |
| 1973 | 9 1 6   | 4 | CHRISTINE | 13.7 | 50.7 | 50 | 0    |
| 1973 | 9 1 12  | 4 | CHRISTINE | 14.3 | 52.3 | 50 | 1002 |
| 1973 | 9 1 18  | 4 | CHRISTINE | 14.5 | 53.3 | 50 | 0    |
| 1973 | 9 2 0   | 4 | CHRISTINE | 14.7 | 54.4 | 55 | 999  |
| 1973 | 9 2 6   | 4 | CHRISTINE | 14.9 | 55.5 | 60 | 996  |
| 1973 | 9 2 12  | 4 | CHRISTINE | 15.2 | 56.8 | 60 | 0    |
| 1973 | 9 2 18  | 4 | CHRISTINE | 15.3 | 57.7 | 55 | 0    |
| 1973 | 9 3 0   | 4 | CHRISTINE | 15.6 | 58.6 | 55 | 1004 |
| 1973 | 9 3 6   | 4 | CHRISTINE | 16.0 | 59.5 | 55 | 0    |
| 1973 | 9 3 12  | 4 | CHRISTINE | 16.4 | 60.3 | 50 | 1008 |
| 1973 | 9 3 18  | 4 | CHRISTINE | 16.8 | 61.6 | 30 | 0    |
| 1973 | 9 4 0   | 4 | CHRISTINE | 17.1 | 62.7 | 30 | 1011 |
| 1973 | 9 4 6   | 4 | CHRISTINE | 17.7 | 63.8 | 30 | 0    |
| 1973 | 9 4 12  | 4 | CHRISTINE | 18.4 | 65.0 | 30 | 0    |
| 1973 | 9 4 18  | 4 | CHRISTINE | 19.0 | 66.2 | 30 | 0    |
| 1973 | 9 1 18  | 5 | DELIA     | 20.5 | 86.5 | 30 | 1008 |
| 1973 | 9 2 0   | 5 | DELIA     | 21.3 | 86.8 | 30 | 0    |
| 1973 | 9 2 6   | 5 | DELIA     | 21.9 | 87.0 | 30 | 0    |
| 1973 | 9 2 12  | 5 | DELIA     | 22.5 | 87.1 | 30 | 0    |
| 1973 | 9 2 18  | 5 | DELIA     | 23.1 | 87.4 | 30 | 0    |
| 1973 | 9 3 0   | 5 | DELIA     | 24.0 | 88.0 | 40 | 1000 |
| 1973 | 9 3 6   | 5 | DELIA     | 25.0 | 88.9 | 50 | 0    |

|      |   |    |    |   |       |      |       |    |      |
|------|---|----|----|---|-------|------|-------|----|------|
| 1973 | 9 | 3  | 12 | 5 | DELIA | 25.9 | 89.9  | 60 | 997  |
| 1973 | 9 | 3  | 18 | 5 | DELIA | 26.5 | 91.0  | 60 | 994  |
| 1973 | 9 | 4  | 0  | 5 | DELIA | 27.0 | 92.4  | 60 | 0    |
| 1973 | 9 | 4  | 6  | 5 | DELIA | 26.9 | 93.0  | 60 | 0    |
| 1973 | 9 | 4  | 12 | 5 | DELIA | 27.5 | 93.1  | 60 | 993  |
| 1973 | 9 | 4  | 18 | 5 | DELIA | 28.4 | 94.0  | 60 | 986  |
| 1973 | 9 | 5  | 0  | 5 | DELIA | 29.0 | 94.9  | 55 | 0    |
| 1973 | 9 | 5  | 6  | 5 | DELIA | 28.9 | 95.8  | 50 | 0    |
| 1973 | 9 | 5  | 12 | 5 | DELIA | 28.1 | 96.0  | 45 | 988  |
| 1973 | 9 | 5  | 18 | 5 | DELIA | 28.0 | 95.5  | 40 | 0    |
| 1973 | 9 | 6  | 0  | 5 | DELIA | 28.0 | 95.2  | 45 | 0    |
| 1973 | 9 | 6  | 6  | 5 | DELIA | 29.0 | 95.6  | 40 | 0    |
| 1973 | 9 | 6  | 12 | 5 | DELIA | 29.8 | 96.3  | 35 | 0    |
| 1973 | 9 | 6  | 18 | 5 | DELIA | 30.3 | 98.1  | 30 | 0    |
| 1973 | 9 | 7  | 0  | 5 | DELIA | 30.2 | 100.2 | 30 | 0    |
| 1973 | 9 | 7  | 6  | 5 | DELIA | 29.2 | 101.7 | 30 | 0    |
| 1973 | 9 | 14 | 12 | 6 | ELLEN | 10.5 | 22.4  | 30 | 0    |
| 1973 | 9 | 14 | 18 | 6 | ELLEN | 11.3 | 23.2  | 30 | 0    |
| 1973 | 9 | 15 | 0  | 6 | ELLEN | 12.2 | 24.3  | 30 | 0    |
| 1973 | 9 | 15 | 6  | 6 | ELLEN | 13.1 | 25.0  | 30 | 0    |
| 1973 | 9 | 15 | 12 | 6 | ELLEN | 14.0 | 25.7  | 40 | 1003 |
| 1973 | 9 | 15 | 18 | 6 | ELLEN | 15.1 | 26.8  | 40 | 0    |
| 1973 | 9 | 16 | 0  | 6 | ELLEN | 16.2 | 28.1  | 40 | 0    |
| 1973 | 9 | 16 | 6  | 6 | ELLEN | 17.2 | 29.4  | 40 | 0    |
| 1973 | 9 | 16 | 12 | 6 | ELLEN | 18.2 | 30.7  | 40 | 0    |
| 1973 | 9 | 16 | 18 | 6 | ELLEN | 19.2 | 32.2  | 40 | 0    |
| 1973 | 9 | 17 | 0  | 6 | ELLEN | 20.2 | 33.8  | 45 | 0    |
| 1973 | 9 | 17 | 6  | 6 | ELLEN | 21.1 | 35.3  | 45 | 0    |
| 1973 | 9 | 17 | 12 | 6 | ELLEN | 22.6 | 36.8  | 50 | 1008 |
| 1973 | 9 | 17 | 18 | 6 | ELLEN | 24.5 | 38.3  | 50 | 0    |
| 1973 | 9 | 18 | 0  | 6 | ELLEN | 25.3 | 39.8  | 50 | 0    |
| 1973 | 9 | 18 | 6  | 6 | ELLEN | 26.0 | 41.7  | 50 | 0    |
| 1973 | 9 | 18 | 12 | 6 | ELLEN | 26.5 | 43.5  | 55 | 997  |
| 1973 | 9 | 18 | 18 | 6 | ELLEN | 26.7 | 45.2  | 60 | 995  |
| 1973 | 9 | 19 | 0  | 6 | ELLEN | 26.9 | 47.0  | 65 | 0    |
| 1973 | 9 | 19 | 6  | 6 | ELLEN | 27.1 | 48.7  | 65 | 0    |
| 1973 | 9 | 19 | 12 | 6 | ELLEN | 27.1 | 50.1  | 70 | 0    |
| 1973 | 9 | 19 | 18 | 6 | ELLEN | 27.2 | 51.5  | 75 | 985  |
| 1973 | 9 | 20 | 0  | 6 | ELLEN | 27.8 | 52.4  | 75 | 0    |
| 1973 | 9 | 20 | 6  | 6 | ELLEN | 28.7 | 53.0  | 75 | 0    |
| 1973 | 9 | 20 | 12 | 6 | ELLEN | 29.6 | 53.5  | 80 | 984  |
| 1973 | 9 | 20 | 18 | 6 | ELLEN | 30.7 | 53.9  | 80 | 981  |
| 1973 | 9 | 21 | 0  | 6 | ELLEN | 32.0 | 54.0  | 80 | 977  |
| 1973 | 9 | 21 | 6  | 6 | ELLEN | 33.3 | 53.9  | 80 | 0    |

|      |    |    |    |   |       |      |      |     |      |
|------|----|----|----|---|-------|------|------|-----|------|
| 1973 | 9  | 21 | 12 | 6 | ELLEN | 34.6 | 53.4 | 80  | 0    |
| 1973 | 9  | 21 | 18 | 6 | ELLEN | 36.0 | 52.5 | 90  | 962  |
| 1973 | 9  | 22 | 0  | 6 | ELLEN | 37.5 | 50.9 | 90  | 0    |
| 1973 | 9  | 22 | 6  | 6 | ELLEN | 39.5 | 48.5 | 95  | 0    |
| 1973 | 9  | 22 | 12 | 6 | ELLEN | 42.1 | 45.2 | 100 | 0    |
| 1973 | 9  | 22 | 18 | 6 | ELLEN | 44.7 | 41.5 | 95  | 980  |
| 1973 | 9  | 23 | 0  | 6 | ELLEN | 48.6 | 37.0 | 80  | 0    |
| 1973 | 9  | 23 | 6  | 6 | ELLEN | 52.3 | 31.6 | 60  | 0    |
| 1973 | 9  | 23 | 12 | 6 | ELLEN | 55.5 | 25.0 | 50  | 0    |
| 1973 | 10 | 8  | 18 | 7 | FRAN  | 30.0 | 65.8 | 30  | 1008 |
| 1973 | 10 | 9  | 0  | 7 | FRAN  | 30.3 | 63.9 | 30  | 0    |
| 1973 | 10 | 9  | 6  | 7 | FRAN  | 30.7 | 62.3 | 40  | 0    |
| 1973 | 10 | 9  | 12 | 7 | FRAN  | 31.0 | 60.2 | 45  | 1005 |
| 1973 | 10 | 9  | 18 | 7 | FRAN  | 31.5 | 57.8 | 55  | 1003 |
| 1973 | 10 | 10 | 0  | 7 | FRAN  | 31.9 | 55.2 | 65  | 998  |
| 1973 | 10 | 10 | 6  | 7 | FRAN  | 32.5 | 51.7 | 65  | 0    |
| 1973 | 10 | 10 | 12 | 7 | FRAN  | 33.1 | 48.1 | 65  | 0    |
| 1973 | 10 | 10 | 18 | 7 | FRAN  | 33.8 | 44.9 | 65  | 996  |
| 1973 | 10 | 11 | 0  | 7 | FRAN  | 35.1 | 41.9 | 65  | 993  |
| 1973 | 10 | 11 | 6  | 7 | FRAN  | 36.8 | 38.3 | 70  | 0    |
| 1973 | 10 | 11 | 12 | 7 | FRAN  | 38.7 | 34.5 | 70  | 0    |
| 1973 | 10 | 11 | 18 | 7 | FRAN  | 40.7 | 30.2 | 70  | 0    |
| 1973 | 10 | 12 | 0  | 7 | FRAN  | 42.7 | 25.8 | 70  | 993  |
| 1973 | 10 | 12 | 6  | 7 | FRAN  | 45.4 | 21.5 | 65  | 983  |
| 1973 | 10 | 12 | 12 | 7 | FRAN  | 47.2 | 16.4 | 65  | 978  |
| 1973 | 10 | 12 | 18 | 7 | FRAN  | 48.0 | 13.0 | 65  | 0    |
| 1973 | 10 | 13 | 0  | 7 | FRAN  | 48.2 | 10.2 | 65  | 0    |
| 1973 | 10 | 13 | 6  | 7 | FRAN  | 48.2 | 8.0  | 65  | 0    |
| 1973 | 10 | 13 | 12 | 7 | FRAN  | 47.9 | 6.5  | 65  | 0    |
| 1973 | 10 | 16 | 6  | 8 | GILDA | 16.3 | 82.0 | 30  | 1008 |
| 1973 | 10 | 16 | 12 | 8 | GILDA | 16.9 | 81.9 | 30  | 0    |
| 1973 | 10 | 16 | 18 | 8 | GILDA | 17.6 | 81.8 | 30  | 0    |
| 1973 | 10 | 17 | 0  | 8 | GILDA | 18.1 | 81.6 | 30  | 0    |
| 1973 | 10 | 17 | 6  | 8 | GILDA | 18.4 | 81.1 | 30  | 1005 |
| 1973 | 10 | 17 | 12 | 8 | GILDA | 18.8 | 80.7 | 30  | 0    |
| 1973 | 10 | 17 | 18 | 8 | GILDA | 19.1 | 80.3 | 30  | 1002 |
| 1973 | 10 | 18 | 0  | 8 | GILDA | 19.5 | 79.9 | 40  | 996  |
| 1973 | 10 | 18 | 6  | 8 | GILDA | 20.1 | 79.7 | 45  | 0    |
| 1973 | 10 | 18 | 12 | 8 | GILDA | 20.7 | 79.6 | 50  | 0    |
| 1973 | 10 | 18 | 18 | 8 | GILDA | 21.3 | 79.3 | 60  | 0    |
| 1973 | 10 | 19 | 0  | 8 | GILDA | 22.0 | 79.0 | 50  | 995  |
| 1973 | 10 | 19 | 6  | 8 | GILDA | 22.6 | 78.9 | 50  | 0    |
| 1973 | 10 | 19 | 12 | 8 | GILDA | 23.0 | 78.5 | 50  | 0    |
| 1973 | 10 | 19 | 18 | 8 | GILDA | 23.3 | 78.0 | 50  | 0    |

|            |    |   |           |      |      |    |      |
|------------|----|---|-----------|------|------|----|------|
| 1973 10 20 | 0  | 8 | GILDA     | 23.6 | 77.5 | 50 | 994  |
| 1973 10 20 | 6  | 8 | GILDA     | 24.0 | 76.8 | 50 | 0    |
| 1973 10 20 | 12 | 8 | GILDA     | 24.4 | 76.3 | 50 | 0    |
| 1973 10 20 | 18 | 8 | GILDA     | 24.8 | 76.0 | 50 | 0    |
| 1973 10 21 | 0  | 8 | GILDA     | 25.1 | 75.9 | 45 | 995  |
| 1973 10 21 | 6  | 8 | GILDA     | 25.3 | 75.8 | 45 | 0    |
| 1973 10 21 | 12 | 8 | GILDA     | 25.4 | 75.8 | 45 | 0    |
| 1973 10 21 | 18 | 8 | GILDA     | 25.5 | 75.8 | 35 | 1000 |
| 1973 10 22 | 0  | 8 | GILDA     | 25.6 | 75.7 | 35 | 0    |
| 1973 10 22 | 6  | 8 | GILDA     | 25.6 | 75.6 | 45 | 0    |
| 1973 10 22 | 12 | 8 | GILDA     | 25.6 | 75.7 | 40 | 0    |
| 1973 10 22 | 18 | 8 | GILDA     | 25.6 | 75.7 | 30 | 1003 |
| 1973 10 23 | 0  | 8 | GILDA     | 25.6 | 75.7 | 30 | 0    |
| 1973 10 23 | 6  | 8 | GILDA     | 25.6 | 75.7 | 30 | 0    |
| 1973 10 23 | 12 | 8 | GILDA     | 25.6 | 75.7 | 30 | 0    |
| 1973 10 23 | 18 | 8 | GILDA     | 25.7 | 75.3 | 30 | 1004 |
| 1973 10 24 | 0  | 8 | GILDA     | 26.0 | 74.5 | 30 | 0    |
| 1973 10 24 | 6  | 8 | GILDA     | 27.2 | 72.6 | 30 | 0    |
| 1973 10 24 | 12 | 8 | GILDA     | 28.6 | 71.7 | 35 | 1001 |
| 1973 10 24 | 18 | 8 | GILDA     | 29.9 | 71.4 | 40 | 0    |
| 1973 10 25 | 0  | 8 | GILDA     | 30.8 | 71.2 | 45 | 996  |
| 1973 10 25 | 6  | 8 | GILDA     | 31.7 | 71.0 | 50 | 0    |
| 1973 10 25 | 12 | 8 | GILDA     | 32.5 | 70.9 | 60 | 0    |
| 1973 10 25 | 18 | 8 | GILDA     | 33.2 | 70.8 | 60 | 0    |
| 1973 10 26 | 0  | 8 | GILDA     | 34.1 | 70.4 | 60 | 985  |
| 1973 10 26 | 6  | 8 | GILDA     | 34.8 | 69.8 | 60 | 0    |
| 1973 10 26 | 12 | 8 | GILDA     | 35.5 | 69.0 | 60 | 0    |
| 1973 10 26 | 18 | 8 | GILDA     | 36.2 | 67.8 | 60 | 0    |
| 1973 10 27 | 0  | 8 | GILDA     | 36.9 | 65.9 | 55 | 984  |
| 1973 10 27 | 6  | 8 | GILDA     | 38.8 | 63.2 | 55 | 0    |
| 1973 10 27 | 12 | 8 | GILDA     | 41.2 | 60.8 | 55 | 0    |
| 1973 10 27 | 18 | 8 | GILDA     | 43.7 | 58.6 | 55 | 980  |
| 1973 10 28 | 0  | 8 | GILDA     | 45.4 | 55.2 | 55 | 0    |
| 1973 10 28 | 6  | 8 | GILDA     | 47.5 | 51.5 | 55 | 968  |
| 1973 10 28 | 12 | 8 | GILDA     | 51.2 | 48.1 | 55 | 0    |
| 1973 10 28 | 18 | 8 | GILDA     | 54.9 | 44.9 | 50 | 0    |
| 1973 10 29 | 0  | 8 | GILDA     | 57.5 | 42.7 | 45 | 0    |
| 1973 10 29 | 6  | 8 | GILDA     | 59.6 | 41.2 | 40 | 0    |
| 1973 10 29 | 12 | 8 | GILDA     | 60.8 | 40.6 | 40 | 970  |
| 1973 10 29 | 18 | 8 | GILDA     | 61.4 | 40.5 | 35 | 0    |
| 1973 10 30 | 0  | 8 | GILDA     | 61.8 | 40.4 | 30 | 0    |
| 1974 6 24  | 18 | 1 | SUBTROP 1 | 24.0 | 88.0 | 30 | 0    |
| 1974 6 25  | 0  | 1 | SUBTROP 1 | 25.4 | 86.2 | 40 | 0    |
| 1974 6 25  | 6  | 1 | SUBTROP 1 | 27.5 | 83.2 | 45 | 0    |

|      |         |             |      |      |         |
|------|---------|-------------|------|------|---------|
| 1974 | 6 25 12 | 1 SUBTROP 1 | 28.8 | 81.5 | 55 1000 |
| 1974 | 6 25 18 | 1 SUBTROP 1 | 31.0 | 78.7 | 55 0    |
| 1974 | 6 26 0  | 1 SUBTROP 1 | 33.5 | 75.5 | 35 1004 |
| 1974 | 7 16 0  | 2 SUBTROP 2 | 29.0 | 75.0 | 25 0    |
| 1974 | 7 16 6  | 2 SUBTROP 2 | 30.2 | 74.5 | 30 0    |
| 1974 | 7 16 12 | 2 SUBTROP 2 | 31.2 | 73.8 | 30 0    |
| 1974 | 7 16 18 | 2 SUBTROP 2 | 32.0 | 72.9 | 30 0    |
| 1974 | 7 17 0  | 2 SUBTROP 2 | 32.9 | 71.8 | 30 0    |
| 1974 | 7 17 6  | 2 SUBTROP 2 | 33.9 | 70.6 | 30 0    |
| 1974 | 7 17 12 | 2 SUBTROP 2 | 35.0 | 68.8 | 35 0    |
| 1974 | 7 17 18 | 2 SUBTROP 2 | 36.1 | 66.2 | 35 0    |
| 1974 | 7 18 0  | 2 SUBTROP 2 | 37.2 | 63.5 | 40 0    |
| 1974 | 7 18 6  | 2 SUBTROP 2 | 38.1 | 60.9 | 40 0    |
| 1974 | 7 18 12 | 2 SUBTROP 2 | 39.0 | 58.4 | 45 1006 |
| 1974 | 7 18 18 | 2 SUBTROP 2 | 39.9 | 55.0 | 45 0    |
| 1974 | 7 19 0  | 2 SUBTROP 2 | 40.7 | 52.4 | 45 0    |
| 1974 | 7 19 6  | 2 SUBTROP 2 | 41.6 | 51.5 | 45 0    |
| 1974 | 7 19 12 | 2 SUBTROP 2 | 42.5 | 50.8 | 45 0    |
| 1974 | 7 19 18 | 2 SUBTROP 2 | 43.6 | 49.9 | 40 0    |
| 1974 | 7 20 0  | 2 SUBTROP 2 | 45.0 | 49.0 | 40 0    |
| 1974 | 7 20 6  | 2 SUBTROP 2 | 46.7 | 48.0 | 40 0    |
| 1974 | 7 20 12 | 2 SUBTROP 2 | 48.8 | 47.0 | 35 0    |
| 1974 | 8 10 12 | 3 SUBTROP 3 | 38.0 | 70.0 | 35 1012 |
| 1974 | 8 10 18 | 3 SUBTROP 3 | 37.1 | 69.6 | 35 0    |
| 1974 | 8 11 0  | 3 SUBTROP 3 | 36.4 | 69.0 | 35 0    |
| 1974 | 8 11 6  | 3 SUBTROP 3 | 35.7 | 68.0 | 35 0    |
| 1974 | 8 11 12 | 3 SUBTROP 3 | 35.5 | 67.0 | 40 0    |
| 1974 | 8 11 18 | 3 SUBTROP 3 | 35.9 | 66.0 | 40 0    |
| 1974 | 8 12 0  | 3 SUBTROP 3 | 36.5 | 65.4 | 40 0    |
| 1974 | 8 12 6  | 3 SUBTROP 3 | 36.7 | 65.3 | 40 0    |
| 1974 | 8 12 12 | 3 SUBTROP 3 | 37.0 | 65.4 | 40 1007 |
| 1974 | 8 12 18 | 3 SUBTROP 3 | 37.5 | 65.5 | 40 0    |
| 1974 | 8 13 0  | 3 SUBTROP 3 | 38.0 | 65.5 | 40 0    |
| 1974 | 8 13 6  | 3 SUBTROP 3 | 38.5 | 65.5 | 40 0    |
| 1974 | 8 13 12 | 3 SUBTROP 3 | 39.0 | 65.5 | 40 1003 |
| 1974 | 8 13 18 | 3 SUBTROP 3 | 39.5 | 64.9 | 40 0    |
| 1974 | 8 14 0  | 3 SUBTROP 3 | 40.0 | 64.0 | 45 0    |
| 1974 | 8 14 6  | 3 SUBTROP 3 | 40.7 | 64.0 | 45 0    |
| 1974 | 8 14 12 | 3 SUBTROP 3 | 41.5 | 64.0 | 50 992  |
| 1974 | 8 14 18 | 3 SUBTROP 3 | 42.4 | 62.6 | 50 0    |
| 1974 | 8 15 0  | 3 SUBTROP 3 | 43.5 | 60.0 | 45 0    |
| 1974 | 8 12 12 | 4 ALMA      | 10.5 | 43.0 | 25 1010 |
| 1974 | 8 12 18 | 4 ALMA      | 10.4 | 45.3 | 25 0    |
| 1974 | 8 13 0  | 4 ALMA      | 10.3 | 47.5 | 25 0    |

|      |         |    |   |        |      |      |     |      |
|------|---------|----|---|--------|------|------|-----|------|
| 1974 | 8 13    | 6  | 4 | ALMA   | 10.2 | 49.8 | 30  | 0    |
| 1974 | 8 13 12 |    | 4 | ALMA   | 10.1 | 52.0 | 35  | 0    |
| 1974 | 8 13 18 |    | 4 | ALMA   | 10.0 | 54.0 | 55  | 1007 |
| 1974 | 8 14    | 0  | 4 | ALMA   | 10.1 | 56.5 | 50  | 0    |
| 1974 | 8 14    | 6  | 4 | ALMA   | 10.1 | 58.5 | 45  | 0    |
| 1974 | 8 14 12 |    | 4 | ALMA   | 10.2 | 60.5 | 40  | 0    |
| 1974 | 8 14 18 |    | 4 | ALMA   | 10.3 | 63.0 | 35  | 0    |
| 1974 | 8 15    | 0  | 4 | ALMA   | 10.4 | 65.5 | 35  | 0    |
| 1974 | 8 15    | 6  | 4 | ALMA   | 10.5 | 67.5 | 35  | 0    |
| 1974 | 8 15 12 |    | 4 | ALMA   | 10.5 | 70.0 | 35  | 0    |
| 1974 | 8 26    | 12 | 5 | BECKY  | 27.0 | 69.0 | 25  | 0    |
| 1974 | 8 26    | 18 | 5 | BECKY  | 27.4 | 69.3 | 30  | 0    |
| 1974 | 8 27    | 0  | 5 | BECKY  | 28.0 | 69.5 | 30  | 0    |
| 1974 | 8 27    | 6  | 5 | BECKY  | 29.0 | 69.7 | 30  | 0    |
| 1974 | 8 27 12 |    | 5 | BECKY  | 30.0 | 69.8 | 30  | 0    |
| 1974 | 8 27 18 |    | 5 | BECKY  | 30.8 | 69.8 | 30  | 0    |
| 1974 | 8 28    | 0  | 5 | BECKY  | 31.5 | 69.5 | 30  | 1010 |
| 1974 | 8 28    | 6  | 5 | BECKY  | 32.1 | 69.0 | 35  | 0    |
| 1974 | 8 28 12 |    | 5 | BECKY  | 32.7 | 68.5 | 50  | 1003 |
| 1974 | 8 28 18 |    | 5 | BECKY  | 33.7 | 67.8 | 65  | 1000 |
| 1974 | 8 29    | 0  | 5 | BECKY  | 34.5 | 67.2 | 65  | 992  |
| 1974 | 8 29    | 6  | 5 | BECKY  | 35.3 | 66.1 | 80  | 0    |
| 1974 | 8 29 12 |    | 5 | BECKY  | 36.0 | 65.0 | 85  | 987  |
| 1974 | 8 29 18 |    | 5 | BECKY  | 36.5 | 63.9 | 90  | 0    |
| 1974 | 8 30    | 0  | 5 | BECKY  | 37.0 | 62.8 | 95  | 0    |
| 1974 | 8 30    | 6  | 5 | BECKY  | 37.3 | 61.8 | 100 | 0    |
| 1974 | 8 30 12 |    | 5 | BECKY  | 38.0 | 61.0 | 100 | 977  |
| 1974 | 8 30 18 |    | 5 | BECKY  | 38.5 | 60.2 | 100 | 0    |
| 1974 | 8 31    | 0  | 5 | BECKY  | 39.3 | 59.2 | 100 | 0    |
| 1974 | 8 31    | 6  | 5 | BECKY  | 40.0 | 58.0 | 100 | 0    |
| 1974 | 8 31 12 |    | 5 | BECKY  | 40.3 | 56.0 | 100 | 0    |
| 1974 | 8 31 18 |    | 5 | BECKY  | 41.0 | 54.5 | 95  | 0    |
| 1974 | 9 1     | 0  | 5 | BECKY  | 41.7 | 52.7 | 90  | 0    |
| 1974 | 9 1     | 6  | 5 | BECKY  | 42.1 | 50.4 | 85  | 0    |
| 1974 | 9 1 12  |    | 5 | BECKY  | 42.7 | 47.8 | 80  | 0    |
| 1974 | 9 1 18  |    | 5 | BECKY  | 43.0 | 44.5 | 70  | 0    |
| 1974 | 9 2     | 0  | 5 | BECKY  | 43.1 | 40.8 | 60  | 0    |
| 1974 | 9 2     | 6  | 5 | BECKY  | 43.0 | 36.0 | 40  | 0    |
| 1974 | 8 29    | 6  | 6 | CARMEN | 16.8 | 55.8 | 30  | 1011 |
| 1974 | 8 29 12 |    | 6 | CARMEN | 16.4 | 58.0 | 30  | 0    |
| 1974 | 8 29 18 |    | 6 | CARMEN | 16.5 | 60.3 | 30  | 0    |
| 1974 | 8 30    | 0  | 6 | CARMEN | 16.6 | 62.7 | 30  | 0    |
| 1974 | 8 30    | 6  | 6 | CARMEN | 16.8 | 65.0 | 30  | 0    |
| 1974 | 8 30 12 |    | 6 | CARMEN | 17.0 | 67.4 | 35  | 0    |



|      |         |          |      |      |     |      |
|------|---------|----------|------|------|-----|------|
| 1974 | 8 30 18 | 6 CARMEN | 17.0 | 69.9 | 40  | 1001 |
| 1974 | 8 31 0  | 6 CARMEN | 17.0 | 72.2 | 45  | 0    |
| 1974 | 8 31 6  | 6 CARMEN | 17.0 | 74.2 | 50  | 0    |
| 1974 | 8 31 12 | 6 CARMEN | 17.0 | 76.0 | 65  | 988  |
| 1974 | 8 31 18 | 6 CARMEN | 17.2 | 77.9 | 75  | 0    |
| 1974 | 9 1 0   | 6 CARMEN | 17.3 | 79.8 | 80  | 0    |
| 1974 | 9 1 6   | 6 CARMEN | 17.5 | 81.5 | 85  | 972  |
| 1974 | 9 1 12  | 6 CARMEN | 17.7 | 83.2 | 105 | 960  |
| 1974 | 9 1 18  | 6 CARMEN | 17.8 | 84.7 | 115 | 0    |
| 1974 | 9 2 0   | 6 CARMEN | 18.0 | 85.9 | 125 | 933  |
| 1974 | 9 2 6   | 6 CARMEN | 18.4 | 86.8 | 130 | 928  |
| 1974 | 9 2 12  | 6 CARMEN | 18.6 | 87.9 | 120 | 956  |
| 1974 | 9 2 18  | 6 CARMEN | 18.8 | 88.8 | 90  | 0    |
| 1974 | 9 3 0   | 6 CARMEN | 19.1 | 89.3 | 60  | 0    |
| 1974 | 9 3 6   | 6 CARMEN | 19.3 | 89.7 | 60  | 0    |
| 1974 | 9 3 12  | 6 CARMEN | 19.6 | 90.2 | 60  | 0    |
| 1974 | 9 3 18  | 6 CARMEN | 19.9 | 90.4 | 60  | 1000 |
| 1974 | 9 4 0   | 6 CARMEN | 20.0 | 90.7 | 55  | 0    |
| 1974 | 9 4 6   | 6 CARMEN | 20.1 | 90.8 | 50  | 0    |
| 1974 | 9 4 12  | 6 CARMEN | 20.3 | 91.0 | 50  | 0    |
| 1974 | 9 4 18  | 6 CARMEN | 20.5 | 91.0 | 55  | 995  |
| 1974 | 9 5 0   | 6 CARMEN | 20.7 | 90.9 | 50  | 0    |
| 1974 | 9 5 6   | 6 CARMEN | 20.9 | 90.9 | 55  | 0    |
| 1974 | 9 5 12  | 6 CARMEN | 21.2 | 90.8 | 65  | 985  |
| 1974 | 9 5 18  | 6 CARMEN | 21.5 | 90.7 | 65  | 0    |
| 1974 | 9 6 0   | 6 CARMEN | 21.9 | 90.5 | 65  | 983  |
| 1974 | 9 6 6   | 6 CARMEN | 22.4 | 90.5 | 70  | 971  |
| 1974 | 9 6 12  | 6 CARMEN | 22.9 | 90.4 | 80  | 969  |
| 1974 | 9 6 18  | 6 CARMEN | 23.7 | 90.4 | 95  | 0    |
| 1974 | 9 7 0   | 6 CARMEN | 24.6 | 90.3 | 100 | 967  |
| 1974 | 9 7 6   | 6 CARMEN | 25.7 | 90.3 | 105 | 0    |
| 1974 | 9 7 12  | 6 CARMEN | 26.8 | 90.3 | 110 | 950  |
| 1974 | 9 7 18  | 6 CARMEN | 27.8 | 90.4 | 115 | 944  |
| 1974 | 9 8 0   | 6 CARMEN | 28.7 | 90.8 | 130 | 937  |
| 1974 | 9 8 6   | 6 CARMEN | 29.4 | 91.3 | 105 | 0    |
| 1974 | 9 8 12  | 6 CARMEN | 30.0 | 92.1 | 75  | 0    |
| 1974 | 9 8 18  | 6 CARMEN | 30.5 | 92.6 | 45  | 0    |
| 1974 | 9 9 0   | 6 CARMEN | 30.8 | 93.6 | 30  | 0    |
| 1974 | 9 9 6   | 6 CARMEN | 30.9 | 94.4 | 25  | 0    |
| 1974 | 9 9 12  | 6 CARMEN | 31.0 | 95.1 | 25  | 0    |
| 1974 | 9 9 18  | 6 CARMEN | 31.1 | 95.6 | 25  | 0    |
| 1974 | 9 10 0  | 6 CARMEN | 31.2 | 96.3 | 25  | 0    |
| 1974 | 9 10 6  | 6 CARMEN | 31.3 | 96.7 | 25  | 0    |
| 1974 | 9 2 18  | 7 DOLLY  | 27.2 | 67.9 | 30  | 0    |

|      |   |    |    |          |      |      |    |      |
|------|---|----|----|----------|------|------|----|------|
| 1974 | 9 | 3  | 0  | 7 DOLLY  | 27.7 | 69.0 | 30 | 0    |
| 1974 | 9 | 3  | 6  | 7 DOLLY  | 28.3 | 70.1 | 30 | 0    |
| 1974 | 9 | 3  | 12 | 7 DOLLY  | 29.1 | 71.1 | 30 | 0    |
| 1974 | 9 | 3  | 18 | 7 DOLLY  | 30.2 | 72.0 | 45 | 1005 |
| 1974 | 9 | 4  | 0  | 7 DOLLY  | 31.8 | 72.6 | 45 | 0    |
| 1974 | 9 | 4  | 6  | 7 DOLLY  | 33.6 | 72.6 | 45 | 0    |
| 1974 | 9 | 4  | 12 | 7 DOLLY  | 35.5 | 72.1 | 45 | 0    |
| 1974 | 9 | 4  | 18 | 7 DOLLY  | 37.8 | 70.6 | 40 | 0    |
| 1974 | 9 | 5  | 0  | 7 DOLLY  | 40.8 | 67.5 | 40 | 0    |
| 1974 | 9 | 5  | 6  | 7 DOLLY  | 43.0 | 63.8 | 40 | 0    |
| 1974 | 9 | 5  | 12 | 7 DOLLY  | 44.2 | 60.3 | 35 | 1004 |
| 1974 | 9 | 4  | 18 | 8 ELAINE | 14.7 | 50.5 | 25 | 0    |
| 1974 | 9 | 5  | 0  | 8 ELAINE | 14.8 | 52.2 | 25 | 1012 |
| 1974 | 9 | 5  | 6  | 8 ELAINE | 15.2 | 53.7 | 25 | 0    |
| 1974 | 9 | 5  | 12 | 8 ELAINE | 15.5 | 55.0 | 25 | 0    |
| 1974 | 9 | 5  | 18 | 8 ELAINE | 16.1 | 56.1 | 25 | 1010 |
| 1974 | 9 | 6  | 0  | 8 ELAINE | 16.8 | 57.2 | 30 | 0    |
| 1974 | 9 | 6  | 6  | 8 ELAINE | 17.7 | 58.1 | 30 | 0    |
| 1974 | 9 | 6  | 12 | 8 ELAINE | 18.5 | 58.6 | 30 | 0    |
| 1974 | 9 | 6  | 18 | 8 ELAINE | 19.1 | 59.4 | 30 | 0    |
| 1974 | 9 | 7  | 0  | 8 ELAINE | 19.5 | 60.5 | 30 | 0    |
| 1974 | 9 | 7  | 6  | 8 ELAINE | 20.1 | 61.8 | 30 | 0    |
| 1974 | 9 | 7  | 12 | 8 ELAINE | 21.1 | 63.3 | 30 | 0    |
| 1974 | 9 | 7  | 18 | 8 ELAINE | 23.1 | 65.3 | 30 | 0    |
| 1974 | 9 | 8  | 0  | 8 ELAINE | 24.5 | 66.7 | 30 | 0    |
| 1974 | 9 | 8  | 6  | 8 ELAINE | 25.2 | 67.7 | 30 | 0    |
| 1974 | 9 | 8  | 12 | 8 ELAINE | 25.9 | 68.2 | 30 | 0    |
| 1974 | 9 | 8  | 18 | 8 ELAINE | 27.0 | 69.2 | 30 | 1012 |
| 1974 | 9 | 9  | 0  | 8 ELAINE | 28.1 | 70.2 | 30 | 1008 |
| 1974 | 9 | 9  | 6  | 8 ELAINE | 29.7 | 71.2 | 30 | 0    |
| 1974 | 9 | 9  | 12 | 8 ELAINE | 30.8 | 71.8 | 30 | 0    |
| 1974 | 9 | 9  | 18 | 8 ELAINE | 32.3 | 72.1 | 35 | 1010 |
| 1974 | 9 | 10 | 0  | 8 ELAINE | 33.8 | 71.3 | 45 | 1005 |
| 1974 | 9 | 10 | 6  | 8 ELAINE | 34.4 | 70.0 | 55 | 0    |
| 1974 | 9 | 10 | 12 | 8 ELAINE | 34.8 | 69.3 | 60 | 1001 |
| 1974 | 9 | 10 | 18 | 8 ELAINE | 35.1 | 68.2 | 60 | 0    |
| 1974 | 9 | 11 | 0  | 8 ELAINE | 35.4 | 66.7 | 55 | 1006 |
| 1974 | 9 | 11 | 6  | 8 ELAINE | 35.4 | 65.3 | 50 | 0    |
| 1974 | 9 | 11 | 12 | 8 ELAINE | 35.5 | 64.5 | 50 | 0    |
| 1974 | 9 | 11 | 18 | 8 ELAINE | 35.6 | 63.6 | 50 | 0    |
| 1974 | 9 | 12 | 0  | 8 ELAINE | 35.7 | 62.7 | 50 | 1004 |
| 1974 | 9 | 12 | 6  | 8 ELAINE | 36.3 | 61.9 | 45 | 0    |
| 1974 | 9 | 12 | 12 | 8 ELAINE | 37.0 | 61.2 | 45 | 0    |
| 1974 | 9 | 12 | 18 | 8 ELAINE | 38.7 | 60.1 | 45 | 1008 |

|      |      |       |          |      |       |    |      |
|------|------|-------|----------|------|-------|----|------|
| 1974 | 9 13 | 0     | 8 ELAINE | 39.6 | 58.3  | 45 | 0    |
| 1974 | 9 13 | 6     | 8 ELAINE | 39.8 | 55.9  | 45 | 0    |
| 1974 | 9 13 | 12    | 8 ELAINE | 40.5 | 53.1  | 45 | 0    |
| 1974 | 9 13 | 18    | 8 ELAINE | 41.4 | 50.3  | 40 | 0    |
| 1974 | 9 14 | 0     | 8 ELAINE | 42.0 | 48.0  | 40 | 0    |
| 1974 | 9 14 | 12    | 9 FIFI   | 15.3 | 65.0  | 30 | 0    |
| 1974 | 9 14 | 18    | 9 FIFI   | 15.7 | 66.5  | 30 | 0    |
| 1974 | 9 15 | 0     | 9 FIFI   | 16.0 | 68.0  | 30 | 0    |
| 1974 | 9 15 | 6     | 9 FIFI   | 16.3 | 69.5  | 30 | 0    |
| 1974 | 9 15 | 12    | 9 FIFI   | 16.5 | 71.0  | 30 | 0    |
| 1974 | 9 15 | 18    | 9 FIFI   | 16.8 | 72.5  | 30 | 0    |
| 1974 | 9 16 | 0     | 9 FIFI   | 17.0 | 74.0  | 30 | 0    |
| 1974 | 9 16 | 6     | 9 FIFI   | 17.0 | 75.5  | 30 | 0    |
| 1974 | 9 16 | 12    | 9 FIFI   | 17.0 | 77.0  | 30 | 0    |
| 1974 | 9 16 | 18    | 9 FIFI   | 17.0 | 77.8  | 35 | 1005 |
| 1974 | 9 17 | 0     | 9 FIFI   | 17.0 | 78.7  | 50 | 0    |
| 1974 | 9 17 | 6     | 9 FIFI   | 16.9 | 79.5  | 60 | 993  |
| 1974 | 9 17 | 12    | 9 FIFI   | 16.6 | 80.2  | 70 | 0    |
| 1974 | 9 17 | 18    | 9 FIFI   | 16.4 | 81.0  | 75 | 0    |
| 1974 | 9 18 | 0     | 9 FIFI   | 16.3 | 81.7  | 80 | 0    |
| 1974 | 9 18 | 6     | 9 FIFI   | 16.3 | 82.4  | 85 | 977  |
| 1974 | 9 18 | 12    | 9 FIFI   | 16.3 | 83.5  | 90 | 0    |
| 1974 | 9 18 | 18    | 9 FIFI   | 16.3 | 84.7  | 95 | 0    |
| 1974 | 9 19 | 0     | 9 FIFI   | 16.2 | 85.7  | 95 | 0    |
| 1974 | 9 19 | 6     | 9 FIFI   | 16.1 | 86.6  | 95 | 0    |
| 1974 | 9 19 | 12    | 9 FIFI   | 16.1 | 87.5  | 95 | 971  |
| 1974 | 9 19 | 18    | 9 FIFI   | 16.3 | 88.2  | 90 | 0    |
| 1974 | 9 20 | 0     | 9 FIFI   | 16.7 | 89.2  | 60 | 0    |
| 1974 | 9 20 | 6     | 9 FIFI   | 16.8 | 90.5  | 60 | 0    |
| 1974 | 9 20 | 12    | 9 FIFI   | 16.9 | 92.0  | 45 | 0    |
| 1974 | 9 20 | 18    | 9 FIFI   | 17.0 | 93.5  | 30 | 0    |
| 1974 | 9 21 | 0     | 9 FIFI   | 17.2 | 95.0  | 30 | 0    |
| 1974 | 9 21 | 6     | 9 FIFI   | 17.5 | 97.1  | 30 | 0    |
| 1974 | 9 21 | 12    | 9 FIFI   | 17.5 | 99.0  | 30 | 0    |
| 1974 | 9 21 | 18    | 9 FIFI   | 17.6 | 99.8  | 30 | 0    |
| 1974 | 9 22 | 0     | 9 FIFI   | 17.5 | 101.0 | 35 | 0    |
| 1974 | 9 22 | 6     | 9 FIFI   | 17.7 | 102.5 | 35 | 0    |
| 1974 | 9 22 | 12    | 9 FIFI   | 17.7 | 104.3 | 35 | 0    |
| 1974 | 9 27 | 12 10 | GERTRUDE | 10.7 | 45.1  | 30 | 0    |
| 1974 | 9 27 | 18 10 | GERTRUDE | 10.7 | 46.5  | 30 | 0    |
| 1974 | 9 28 | 0 10  | GERTRUDE | 10.7 | 47.9  | 30 | 0    |
| 1974 | 9 28 | 6 10  | GERTRUDE | 10.6 | 49.0  | 30 | 0    |
| 1974 | 9 28 | 12 10 | GERTRUDE | 10.6 | 50.2  | 30 | 0    |
| 1974 | 9 28 | 18 10 | GERTRUDE | 10.8 | 51.8  | 45 | 1004 |

|      |    |    |    |    |           |      |      |    |      |
|------|----|----|----|----|-----------|------|------|----|------|
| 1974 | 9  | 29 | 0  | 10 | GERTRUDE  | 11.0 | 53.0 | 65 | 999  |
| 1974 | 9  | 29 | 6  | 10 | GERTRUDE  | 11.2 | 54.0 | 65 | 0    |
| 1974 | 9  | 29 | 12 | 10 | GERTRUDE  | 11.4 | 55.0 | 65 | 1000 |
| 1974 | 9  | 29 | 18 | 10 | GERTRUDE  | 11.5 | 55.4 | 65 | 1001 |
| 1974 | 9  | 30 | 0  | 10 | GERTRUDE  | 11.7 | 56.0 | 65 | 1004 |
| 1974 | 9  | 30 | 6  | 10 | GERTRUDE  | 11.3 | 56.4 | 65 | 1005 |
| 1974 | 9  | 30 | 12 | 10 | GERTRUDE  | 11.0 | 56.6 | 65 | 0    |
| 1974 | 9  | 30 | 18 | 10 | GERTRUDE  | 11.5 | 56.5 | 45 | 1008 |
| 1974 | 10 | 1  | 0  | 10 | GERTRUDE  | 11.9 | 57.1 | 45 | 0    |
| 1974 | 10 | 1  | 6  | 10 | GERTRUDE  | 12.0 | 57.7 | 45 | 0    |
| 1974 | 10 | 1  | 12 | 10 | GERTRUDE  | 12.1 | 58.3 | 45 | 1009 |
| 1974 | 10 | 1  | 18 | 10 | GERTRUDE  | 12.2 | 58.9 | 40 | 0    |
| 1974 | 10 | 2  | 0  | 10 | GERTRUDE  | 12.4 | 59.8 | 40 | 0    |
| 1974 | 10 | 2  | 6  | 10 | GERTRUDE  | 12.5 | 60.5 | 35 | 0    |
| 1974 | 10 | 2  | 12 | 10 | GERTRUDE  | 12.6 | 61.5 | 30 | 0    |
| 1974 | 10 | 2  | 18 | 10 | GERTRUDE  | 12.7 | 62.4 | 30 | 0    |
| 1974 | 10 | 3  | 0  | 10 | GERTRUDE  | 12.7 | 63.2 | 30 | 0    |
| 1974 | 10 | 3  | 6  | 10 | GERTRUDE  | 12.8 | 64.1 | 30 | 0    |
| 1974 | 10 | 3  | 12 | 10 | GERTRUDE  | 12.8 | 65.0 | 30 | 0    |
| 1974 | 10 | 3  | 18 | 10 | GERTRUDE  | 12.9 | 66.0 | 30 | 0    |
| 1974 | 10 | 4  | 0  | 10 | GERTRUDE  | 13.0 | 67.0 | 30 | 0    |
| 1974 | 10 | 4  | 0  | 11 | SUBTROP 4 | 21.0 | 75.2 | 30 | 1009 |
| 1974 | 10 | 4  | 6  | 11 | SUBTROP 4 | 21.2 | 75.3 | 30 | 0    |
| 1974 | 10 | 4  | 12 | 11 | SUBTROP 4 | 21.4 | 75.4 | 30 | 0    |
| 1974 | 10 | 4  | 18 | 11 | SUBTROP 4 | 21.6 | 75.5 | 30 | 0    |
| 1974 | 10 | 5  | 0  | 11 | SUBTROP 4 | 21.8 | 75.6 | 30 | 1008 |
| 1974 | 10 | 5  | 6  | 11 | SUBTROP 4 | 22.0 | 75.8 | 30 | 0    |
| 1974 | 10 | 5  | 12 | 11 | SUBTROP 4 | 22.4 | 76.1 | 30 | 0    |
| 1974 | 10 | 5  | 18 | 11 | SUBTROP 4 | 23.1 | 76.5 | 30 | 0    |
| 1974 | 10 | 6  | 0  | 11 | SUBTROP 4 | 23.8 | 77.0 | 40 | 0    |
| 1974 | 10 | 6  | 6  | 11 | SUBTROP 4 | 24.4 | 77.8 | 40 | 0    |
| 1974 | 10 | 6  | 12 | 11 | SUBTROP 4 | 25.0 | 78.7 | 40 | 1006 |
| 1974 | 10 | 6  | 18 | 11 | SUBTROP 4 | 25.8 | 79.3 | 40 | 0    |
| 1974 | 10 | 7  | 0  | 11 | SUBTROP 4 | 26.8 | 79.8 | 45 | 0    |
| 1974 | 10 | 7  | 6  | 11 | SUBTROP 4 | 28.0 | 80.0 | 40 | 0    |
| 1974 | 10 | 7  | 12 | 11 | SUBTROP 4 | 29.3 | 79.7 | 40 | 0    |
| 1974 | 10 | 7  | 18 | 11 | SUBTROP 4 | 30.7 | 78.8 | 40 | 0    |
| 1974 | 10 | 8  | 0  | 11 | SUBTROP 4 | 32.0 | 77.0 | 35 | 1008 |
| 1974 | 10 | 8  | 6  | 11 | SUBTROP 4 | 33.1 | 74.5 | 35 | 0    |
| 1974 | 10 | 8  | 12 | 11 | SUBTROP 4 | 34.2 | 71.2 | 30 | 0    |
| 1974 | 10 | 8  | 18 | 11 | SUBTROP 4 | 35.5 | 67.4 | 30 | 0    |
| 1974 | 10 | 9  | 0  | 11 | SUBTROP 4 | 37.0 | 63.0 | 25 | 0    |
| 1975 | 6  | 27 | 0  | 1  | AMY       | 27.5 | 79.0 | 25 | 1013 |
| 1975 | 6  | 27 | 6  | 1  | AMY       | 28.5 | 79.0 | 25 | 1013 |

|      |         |           |      |      |         |
|------|---------|-----------|------|------|---------|
| 1975 | 6 27 12 | 1 AMY     | 29.5 | 79.0 | 25 1013 |
| 1975 | 6 27 18 | 1 AMY     | 30.5 | 79.0 | 25 1013 |
| 1975 | 6 28 0  | 1 AMY     | 31.5 | 78.8 | 25 1012 |
| 1975 | 6 28 6  | 1 AMY     | 32.4 | 78.7 | 25 1012 |
| 1975 | 6 28 12 | 1 AMY     | 33.3 | 78.0 | 25 1011 |
| 1975 | 6 28 18 | 1 AMY     | 34.0 | 77.0 | 30 1006 |
| 1975 | 6 29 0  | 1 AMY     | 34.4 | 75.8 | 35 1004 |
| 1975 | 6 29 6  | 1 AMY     | 34.0 | 74.8 | 40 1002 |
| 1975 | 6 29 12 | 1 AMY     | 33.8 | 73.8 | 45 1000 |
| 1975 | 6 29 18 | 1 AMY     | 33.8 | 72.8 | 50 998  |
| 1975 | 6 30 0  | 1 AMY     | 34.3 | 71.6 | 50 998  |
| 1975 | 6 30 6  | 1 AMY     | 35.6 | 70.8 | 55 998  |
| 1975 | 6 30 12 | 1 AMY     | 35.9 | 70.5 | 60 987  |
| 1975 | 6 30 18 | 1 AMY     | 36.2 | 70.2 | 60 987  |
| 1975 | 7 1 0   | 1 AMY     | 36.2 | 69.8 | 60 984  |
| 1975 | 7 1 6   | 1 AMY     | 36.2 | 69.4 | 60 984  |
| 1975 | 7 1 12  | 1 AMY     | 36.2 | 68.3 | 60 984  |
| 1975 | 7 1 18  | 1 AMY     | 36.7 | 67.2 | 60 984  |
| 1975 | 7 2 0   | 1 AMY     | 37.4 | 66.7 | 60 984  |
| 1975 | 7 2 6   | 1 AMY     | 37.3 | 65.9 | 60 984  |
| 1975 | 7 2 12  | 1 AMY     | 37.3 | 65.1 | 60 981  |
| 1975 | 7 2 18  | 1 AMY     | 37.3 | 64.1 | 60 986  |
| 1975 | 7 3 0   | 1 AMY     | 37.7 | 62.8 | 55 986  |
| 1975 | 7 3 6   | 1 AMY     | 38.2 | 61.2 | 55 986  |
| 1975 | 7 3 12  | 1 AMY     | 39.3 | 59.6 | 55 986  |
| 1975 | 7 3 18  | 1 AMY     | 40.5 | 58.0 | 50 986  |
| 1975 | 7 4 0   | 1 AMY     | 42.5 | 54.8 | 50 986  |
| 1975 | 7 4 6   | 1 AMY     | 44.5 | 51.6 | 50 986  |
| 1975 | 7 4 12  | 1 AMY     | 47.0 | 48.0 | 45 995  |
| 1975 | 7 24 0  | 2 BLANCHE | 26.0 | 68.4 | 20 1014 |
| 1975 | 7 24 6  | 2 BLANCHE | 26.0 | 69.5 | 20 1014 |
| 1975 | 7 24 12 | 2 BLANCHE | 26.1 | 70.5 | 25 1014 |
| 1975 | 7 24 18 | 2 BLANCHE | 26.5 | 71.5 | 30 1013 |
| 1975 | 7 25 0  | 2 BLANCHE | 27.2 | 72.5 | 30 1012 |
| 1975 | 7 25 6  | 2 BLANCHE | 28.0 | 73.6 | 30 1010 |
| 1975 | 7 25 12 | 2 BLANCHE | 28.9 | 74.3 | 30 1007 |
| 1975 | 7 25 18 | 2 BLANCHE | 29.9 | 74.9 | 30 1006 |
| 1975 | 7 26 0  | 2 BLANCHE | 31.0 | 75.0 | 30 1005 |
| 1975 | 7 26 6  | 2 BLANCHE | 32.2 | 74.6 | 35 1004 |
| 1975 | 7 26 12 | 2 BLANCHE | 33.4 | 73.5 | 35 1003 |
| 1975 | 7 26 18 | 2 BLANCHE | 34.2 | 72.2 | 50 998  |
| 1975 | 7 27 0  | 2 BLANCHE | 35.0 | 71.0 | 60 992  |
| 1975 | 7 27 6  | 2 BLANCHE | 35.9 | 70.0 | 65 987  |
| 1975 | 7 27 12 | 2 BLANCHE | 36.9 | 69.0 | 70 984  |

|      |         |   |          |      |      |     |      |
|------|---------|---|----------|------|------|-----|------|
| 1975 | 7 27 18 | 2 | BLANCHE  | 37.9 | 68.0 | 75  | 981  |
| 1975 | 7 28 0  | 2 | BLANCHE  | 39.3 | 67.2 | 75  | 980  |
| 1975 | 7 28 6  | 2 | BLANCHE  | 41.2 | 66.4 | 70  | 980  |
| 1975 | 7 28 12 | 2 | BLANCHE  | 44.0 | 65.2 | 60  | 988  |
| 1975 | 7 28 18 | 2 | BLANCHE  | 47.2 | 62.4 | 60  | 992  |
| 1975 | 8 24 12 | 3 | CAROLINE | 22.4 | 69.8 | 25  | 1011 |
| 1975 | 8 24 18 | 3 | CAROLINE | 21.9 | 71.1 | 25  | 1011 |
| 1975 | 8 25 0  | 3 | CAROLINE | 21.6 | 72.5 | 25  | 1010 |
| 1975 | 8 25 6  | 3 | CAROLINE | 21.2 | 73.8 | 25  | 1010 |
| 1975 | 8 25 12 | 3 | CAROLINE | 20.9 | 75.1 | 25  | 1011 |
| 1975 | 8 25 18 | 3 | CAROLINE | 20.6 | 76.4 | 25  | 1011 |
| 1975 | 8 26 0  | 3 | CAROLINE | 20.4 | 77.7 | 25  | 1011 |
| 1975 | 8 26 6  | 3 | CAROLINE | 20.3 | 79.0 | 25  | 1011 |
| 1975 | 8 26 12 | 3 | CAROLINE | 20.2 | 80.3 | 25  | 1012 |
| 1975 | 8 26 18 | 3 | CAROLINE | 20.2 | 81.6 | 25  | 1012 |
| 1975 | 8 27 0  | 3 | CAROLINE | 20.4 | 82.8 | 25  | 1013 |
| 1975 | 8 27 6  | 3 | CAROLINE | 20.8 | 84.0 | 25  | 1013 |
| 1975 | 8 27 12 | 3 | CAROLINE | 21.1 | 85.1 | 25  | 1014 |
| 1975 | 8 27 18 | 3 | CAROLINE | 21.5 | 86.3 | 25  | 1014 |
| 1975 | 8 28 0  | 3 | CAROLINE | 22.0 | 87.5 | 25  | 1014 |
| 1975 | 8 28 6  | 3 | CAROLINE | 22.4 | 88.8 | 25  | 1014 |
| 1975 | 8 28 12 | 3 | CAROLINE | 22.8 | 90.1 | 25  | 1013 |
| 1975 | 8 28 18 | 3 | CAROLINE | 22.9 | 91.0 | 25  | 1010 |
| 1975 | 8 29 0  | 3 | CAROLINE | 23.0 | 91.9 | 30  | 1007 |
| 1975 | 8 29 6  | 3 | CAROLINE | 23.1 | 92.6 | 35  | 1003 |
| 1975 | 8 29 12 | 3 | CAROLINE | 23.2 | 93.2 | 40  | 999  |
| 1975 | 8 29 18 | 3 | CAROLINE | 23.2 | 93.6 | 50  | 994  |
| 1975 | 8 30 0  | 3 | CAROLINE | 23.3 | 94.2 | 65  | 990  |
| 1975 | 8 30 6  | 3 | CAROLINE | 23.5 | 94.9 | 65  | 990  |
| 1975 | 8 30 12 | 3 | CAROLINE | 23.7 | 95.6 | 65  | 989  |
| 1975 | 8 30 18 | 3 | CAROLINE | 23.8 | 96.3 | 70  | 987  |
| 1975 | 8 31 0  | 3 | CAROLINE | 24.0 | 97.0 | 100 | 973  |
| 1975 | 8 31 6  | 3 | CAROLINE | 24.1 | 97.5 | 100 | 963  |
| 1975 | 8 31 12 | 3 | CAROLINE | 24.3 | 97.8 | 90  | 963  |
| 1975 | 8 31 18 | 3 | CAROLINE | 24.8 | 98.0 | 55  | 993  |
| 1975 | 9 1 0   | 3 | CAROLINE | 25.1 | 98.3 | 30  | 1000 |
| 1975 | 9 1 6   | 3 | CAROLINE | 25.2 | 98.7 | 20  | 1002 |
| 1975 | 9 1 12  | 3 | CAROLINE | 25.3 | 99.0 | 20  | 1002 |
| 1975 | 8 28 12 | 4 | DORIS    | 33.3 | 46.3 | 35  | 1005 |
| 1975 | 8 28 18 | 4 | DORIS    | 33.6 | 47.5 | 40  | 1005 |
| 1975 | 8 29 0  | 4 | DORIS    | 34.5 | 48.1 | 40  | 1005 |
| 1975 | 8 29 6  | 4 | DORIS    | 34.7 | 48.5 | 45  | 1005 |
| 1975 | 8 29 12 | 4 | DORIS    | 34.9 | 48.9 | 45  | 1005 |
| 1975 | 8 29 18 | 4 | DORIS    | 35.2 | 49.1 | 50  | 1000 |

|      |      |    |   |        |      |      |    |      |
|------|------|----|---|--------|------|------|----|------|
| 1975 | 8 30 | 0  | 4 | DORIS  | 35.3 | 48.9 | 55 | 997  |
| 1975 | 8 30 | 6  | 4 | DORIS  | 35.3 | 48.5 | 55 | 997  |
| 1975 | 8 30 | 12 | 4 | DORIS  | 35.3 | 48.0 | 55 | 997  |
| 1975 | 8 30 | 18 | 4 | DORIS  | 35.0 | 47.1 | 55 | 997  |
| 1975 | 8 31 | 0  | 4 | DORIS  | 34.9 | 46.3 | 65 | 990  |
| 1975 | 8 31 | 6  | 4 | DORIS  | 34.8 | 45.7 | 65 | 990  |
| 1975 | 8 31 | 12 | 4 | DORIS  | 34.7 | 45.2 | 70 | 990  |
| 1975 | 8 31 | 18 | 4 | DORIS  | 34.6 | 44.9 | 70 | 990  |
| 1975 | 9 1  | 0  | 4 | DORIS  | 34.5 | 44.6 | 75 | 984  |
| 1975 | 9 1  | 6  | 4 | DORIS  | 34.6 | 44.2 | 75 | 984  |
| 1975 | 9 1  | 12 | 4 | DORIS  | 34.9 | 44.0 | 75 | 984  |
| 1975 | 9 1  | 18 | 4 | DORIS  | 35.4 | 44.0 | 75 | 984  |
| 1975 | 9 2  | 0  | 4 | DORIS  | 35.8 | 44.4 | 90 | 970  |
| 1975 | 9 2  | 6  | 4 | DORIS  | 36.4 | 44.5 | 95 | 965  |
| 1975 | 9 2  | 12 | 4 | DORIS  | 37.0 | 44.3 | 95 | 965  |
| 1975 | 9 2  | 18 | 4 | DORIS  | 37.7 | 44.2 | 95 | 965  |
| 1975 | 9 3  | 0  | 4 | DORIS  | 38.4 | 43.8 | 95 | 965  |
| 1975 | 9 3  | 6  | 4 | DORIS  | 39.7 | 43.6 | 95 | 965  |
| 1975 | 9 3  | 12 | 4 | DORIS  | 41.1 | 43.0 | 95 | 965  |
| 1975 | 9 3  | 18 | 4 | DORIS  | 42.0 | 42.5 | 90 | 970  |
| 1975 | 9 4  | 0  | 4 | DORIS  | 42.8 | 42.0 | 60 | 995  |
| 1975 | 9 4  | 6  | 4 | DORIS  | 43.2 | 41.4 | 45 | 1005 |
| 1975 | 9 4  | 12 | 4 | DORIS  | 43.5 | 40.7 | 45 | 1005 |
| 1975 | 9 13 | 6  | 5 | ELOISE | 17.5 | 54.1 | 25 | 0    |
| 1975 | 9 13 | 12 | 5 | ELOISE | 17.6 | 55.2 | 25 | 1009 |
| 1975 | 9 13 | 18 | 5 | ELOISE | 17.7 | 56.3 | 25 | 1009 |
| 1975 | 9 14 | 0  | 5 | ELOISE | 17.8 | 57.3 | 25 | 1009 |
| 1975 | 9 14 | 6  | 5 | ELOISE | 17.9 | 58.3 | 25 | 1009 |
| 1975 | 9 14 | 12 | 5 | ELOISE | 18.0 | 59.4 | 25 | 1009 |
| 1975 | 9 14 | 18 | 5 | ELOISE | 18.1 | 60.5 | 25 | 1009 |
| 1975 | 9 15 | 0  | 5 | ELOISE | 18.3 | 61.7 | 25 | 1009 |
| 1975 | 9 15 | 6  | 5 | ELOISE | 18.5 | 62.8 | 25 | 1009 |
| 1975 | 9 15 | 12 | 5 | ELOISE | 18.8 | 63.8 | 30 | 1007 |
| 1975 | 9 15 | 18 | 5 | ELOISE | 18.9 | 64.8 | 30 | 1007 |
| 1975 | 9 16 | 0  | 5 | ELOISE | 19.0 | 65.6 | 35 | 1007 |
| 1975 | 9 16 | 6  | 5 | ELOISE | 19.2 | 66.7 | 45 | 1007 |
| 1975 | 9 16 | 12 | 5 | ELOISE | 19.4 | 67.5 | 55 | 1002 |
| 1975 | 9 16 | 18 | 5 | ELOISE | 19.5 | 68.4 | 65 | 1002 |
| 1975 | 9 17 | 0  | 5 | ELOISE | 19.6 | 69.2 | 65 | 997  |
| 1975 | 9 17 | 6  | 5 | ELOISE | 19.7 | 70.2 | 60 | 1000 |
| 1975 | 9 17 | 12 | 5 | ELOISE | 19.7 | 71.2 | 55 | 1000 |
| 1975 | 9 17 | 18 | 5 | ELOISE | 19.8 | 72.2 | 50 | 1000 |
| 1975 | 9 18 | 0  | 5 | ELOISE | 19.9 | 73.3 | 45 | 1000 |
| 1975 | 9 18 | 6  | 5 | ELOISE | 19.9 | 74.5 | 45 | 1000 |

|      |         |          |      |      |         |
|------|---------|----------|------|------|---------|
| 1975 | 9 18 12 | 5 ELOISE | 19.9 | 75.7 | 40 1000 |
| 1975 | 9 18 18 | 5 ELOISE | 20.0 | 77.0 | 40 1000 |
| 1975 | 9 19 0  | 5 ELOISE | 20.0 | 78.2 | 35 1000 |
| 1975 | 9 19 6  | 5 ELOISE | 19.9 | 79.1 | 35 1000 |
| 1975 | 9 19 12 | 5 ELOISE | 19.9 | 79.8 | 35 1000 |
| 1975 | 9 19 18 | 5 ELOISE | 19.8 | 81.0 | 35 1000 |
| 1975 | 9 20 0  | 5 ELOISE | 19.8 | 82.2 | 35 1000 |
| 1975 | 9 20 6  | 5 ELOISE | 19.8 | 83.4 | 35 1000 |
| 1975 | 9 20 12 | 5 ELOISE | 19.9 | 84.6 | 35 1006 |
| 1975 | 9 20 18 | 5 ELOISE | 20.0 | 85.5 | 35 1006 |
| 1975 | 9 21 0  | 5 ELOISE | 20.2 | 86.4 | 40 1001 |
| 1975 | 9 21 6  | 5 ELOISE | 20.8 | 87.1 | 45 1001 |
| 1975 | 9 21 12 | 5 ELOISE | 21.4 | 87.8 | 50 1001 |
| 1975 | 9 21 18 | 5 ELOISE | 22.4 | 88.5 | 55 995  |
| 1975 | 9 22 0  | 5 ELOISE | 23.6 | 88.9 | 60 995  |
| 1975 | 9 22 6  | 5 ELOISE | 24.8 | 89.4 | 65 993  |
| 1975 | 9 22 12 | 5 ELOISE | 25.8 | 89.5 | 75 986  |
| 1975 | 9 22 18 | 5 ELOISE | 26.5 | 89.4 | 85 980  |
| 1975 | 9 23 0  | 5 ELOISE | 27.3 | 88.5 | 95 968  |
| 1975 | 9 23 6  | 5 ELOISE | 28.4 | 87.3 | 105 958 |
| 1975 | 9 23 12 | 5 ELOISE | 30.2 | 86.3 | 110 955 |
| 1975 | 9 23 18 | 5 ELOISE | 33.0 | 85.7 | 55 982  |
| 1975 | 9 24 0  | 5 ELOISE | 35.5 | 84.3 | 30 999  |
| 1975 | 9 24 6  | 5 ELOISE | 36.5 | 83.5 | 20 1004 |
| 1975 | 9 24 12 | 5 ELOISE | 37.0 | 82.5 | 20 1004 |
| 1975 | 9 24 18 | 5 ELOISE | 37.5 | 81.5 | 20 1004 |
| 1975 | 9 18 6  | 6 FAYE   | 17.5 | 33.5 | 25 0    |
| 1975 | 9 18 12 | 6 FAYE   | 17.8 | 34.4 | 25 0    |
| 1975 | 9 18 18 | 6 FAYE   | 18.3 | 35.3 | 25 0    |
| 1975 | 9 19 0  | 6 FAYE   | 19.0 | 36.4 | 25 0    |
| 1975 | 9 19 6  | 6 FAYE   | 19.6 | 37.6 | 30 0    |
| 1975 | 9 19 12 | 6 FAYE   | 20.0 | 39.0 | 35 0    |
| 1975 | 9 19 18 | 6 FAYE   | 20.4 | 40.2 | 40 0    |
| 1975 | 9 20 0  | 6 FAYE   | 20.5 | 41.3 | 40 0    |
| 1975 | 9 20 6  | 6 FAYE   | 20.5 | 42.7 | 40 0    |
| 1975 | 9 20 12 | 6 FAYE   | 20.3 | 44.0 | 40 0    |
| 1975 | 9 20 18 | 6 FAYE   | 20.2 | 45.3 | 40 0    |
| 1975 | 9 21 0  | 6 FAYE   | 20.3 | 46.2 | 40 0    |
| 1975 | 9 21 6  | 6 FAYE   | 20.3 | 47.0 | 40 0    |
| 1975 | 9 21 12 | 6 FAYE   | 20.3 | 47.8 | 40 0    |
| 1975 | 9 21 18 | 6 FAYE   | 20.4 | 48.5 | 35 0    |
| 1975 | 9 22 0  | 6 FAYE   | 20.5 | 49.3 | 35 0    |
| 1975 | 9 22 6  | 6 FAYE   | 20.5 | 50.0 | 35 0    |
| 1975 | 9 22 12 | 6 FAYE   | 20.4 | 50.8 | 35 0    |



|      |         |          |      |      |    |      |
|------|---------|----------|------|------|----|------|
| 1975 | 9 22 18 | 6 FAYE   | 20.4 | 51.5 | 35 | 0    |
| 1975 | 9 23 0  | 6 FAYE   | 20.4 | 52.2 | 35 | 0    |
| 1975 | 9 23 6  | 6 FAYE   | 20.3 | 53.4 | 35 | 0    |
| 1975 | 9 23 12 | 6 FAYE   | 20.4 | 54.6 | 30 | 0    |
| 1975 | 9 23 18 | 6 FAYE   | 20.6 | 55.8 | 30 | 0    |
| 1975 | 9 24 0  | 6 FAYE   | 20.8 | 56.5 | 30 | 0    |
| 1975 | 9 24 6  | 6 FAYE   | 21.5 | 57.1 | 25 | 0    |
| 1975 | 9 24 12 | 6 FAYE   | 22.4 | 57.0 | 25 | 0    |
| 1975 | 9 24 18 | 6 FAYE   | 23.0 | 56.9 | 25 | 1005 |
| 1975 | 9 25 0  | 6 FAYE   | 23.8 | 57.2 | 30 | 1005 |
| 1975 | 9 25 6  | 6 FAYE   | 24.2 | 58.1 | 35 | 1005 |
| 1975 | 9 25 12 | 6 FAYE   | 24.8 | 58.8 | 45 | 999  |
| 1975 | 9 25 18 | 6 FAYE   | 25.5 | 59.4 | 60 | 993  |
| 1975 | 9 26 0  | 6 FAYE   | 26.5 | 60.0 | 65 | 990  |
| 1975 | 9 26 6  | 6 FAYE   | 27.9 | 60.9 | 70 | 988  |
| 1975 | 9 26 12 | 6 FAYE   | 29.6 | 62.0 | 75 | 985  |
| 1975 | 9 26 18 | 6 FAYE   | 31.0 | 63.1 | 85 | 985  |
| 1975 | 9 27 0  | 6 FAYE   | 32.7 | 64.2 | 90 | 985  |
| 1975 | 9 27 6  | 6 FAYE   | 34.4 | 65.2 | 90 | 979  |
| 1975 | 9 27 12 | 6 FAYE   | 36.1 | 65.7 | 90 | 982  |
| 1975 | 9 27 18 | 6 FAYE   | 37.4 | 65.0 | 90 | 985  |
| 1975 | 9 28 0  | 6 FAYE   | 38.4 | 63.7 | 85 | 985  |
| 1975 | 9 28 6  | 6 FAYE   | 39.8 | 60.5 | 80 | 985  |
| 1975 | 9 28 12 | 6 FAYE   | 41.0 | 57.1 | 75 | 979  |
| 1975 | 9 28 18 | 6 FAYE   | 42.3 | 52.0 | 75 | 977  |
| 1975 | 9 29 0  | 6 FAYE   | 42.8 | 46.0 | 70 | 977  |
| 1975 | 9 29 6  | 6 FAYE   | 42.9 | 40.0 | 65 | 977  |
| 1975 | 9 29 12 | 6 FAYE   | 43.0 | 34.0 | 60 | 0    |
| 1975 | 9 22 18 | 7 GLADYS | 10.3 | 34.8 | 25 | 1012 |
| 1975 | 9 23 0  | 7 GLADYS | 10.6 | 35.8 | 25 | 1012 |
| 1975 | 9 23 6  | 7 GLADYS | 11.0 | 36.7 | 25 | 1012 |
| 1975 | 9 23 12 | 7 GLADYS | 11.4 | 37.4 | 25 | 1012 |
| 1975 | 9 23 18 | 7 GLADYS | 11.7 | 38.2 | 30 | 1010 |
| 1975 | 9 24 0  | 7 GLADYS | 12.1 | 38.8 | 30 | 1010 |
| 1975 | 9 24 6  | 7 GLADYS | 12.4 | 39.6 | 30 | 1010 |
| 1975 | 9 24 12 | 7 GLADYS | 12.9 | 40.0 | 30 | 1010 |
| 1975 | 9 24 18 | 7 GLADYS | 13.5 | 40.4 | 35 | 1005 |
| 1975 | 9 25 0  | 7 GLADYS | 14.2 | 41.0 | 40 | 1005 |
| 1975 | 9 25 6  | 7 GLADYS | 14.8 | 42.0 | 50 | 1000 |
| 1975 | 9 25 12 | 7 GLADYS | 15.4 | 43.0 | 60 | 1000 |
| 1975 | 9 25 18 | 7 GLADYS | 15.8 | 44.0 | 65 | 990  |
| 1975 | 9 26 0  | 7 GLADYS | 16.2 | 45.0 | 65 | 990  |
| 1975 | 9 26 6  | 7 GLADYS | 16.4 | 46.1 | 65 | 990  |
| 1975 | 9 26 12 | 7 GLADYS | 16.6 | 47.7 | 65 | 990  |

|      |    |    |    |   |        |      |      |     |      |
|------|----|----|----|---|--------|------|------|-----|------|
| 1975 | 9  | 26 | 18 | 7 | GLADYS | 16.8 | 49.3 | 65  | 990  |
| 1975 | 9  | 27 | 0  | 7 | GLADYS | 17.1 | 50.7 | 65  | 990  |
| 1975 | 9  | 27 | 6  | 7 | GLADYS | 17.6 | 52.2 | 65  | 990  |
| 1975 | 9  | 27 | 12 | 7 | GLADYS | 18.2 | 53.7 | 65  | 990  |
| 1975 | 9  | 27 | 18 | 7 | GLADYS | 18.8 | 55.1 | 65  | 990  |
| 1975 | 9  | 28 | 0  | 7 | GLADYS | 19.4 | 56.4 | 65  | 992  |
| 1975 | 9  | 28 | 6  | 7 | GLADYS | 19.6 | 57.4 | 65  | 992  |
| 1975 | 9  | 28 | 12 | 7 | GLADYS | 19.8 | 58.2 | 65  | 1000 |
| 1975 | 9  | 28 | 18 | 7 | GLADYS | 20.3 | 59.3 | 65  | 998  |
| 1975 | 9  | 29 | 0  | 7 | GLADYS | 21.2 | 60.3 | 65  | 995  |
| 1975 | 9  | 29 | 6  | 7 | GLADYS | 22.1 | 61.4 | 70  | 990  |
| 1975 | 9  | 29 | 12 | 7 | GLADYS | 23.0 | 62.6 | 70  | 990  |
| 1975 | 9  | 29 | 18 | 7 | GLADYS | 23.6 | 63.9 | 75  | 985  |
| 1975 | 9  | 30 | 0  | 7 | GLADYS | 24.1 | 65.2 | 80  | 975  |
| 1975 | 9  | 30 | 6  | 7 | GLADYS | 24.6 | 66.5 | 80  | 975  |
| 1975 | 9  | 30 | 12 | 7 | GLADYS | 25.1 | 67.9 | 80  | 975  |
| 1975 | 9  | 30 | 18 | 7 | GLADYS | 25.6 | 69.3 | 80  | 975  |
| 1975 | 10 | 1  | 0  | 7 | GLADYS | 26.1 | 70.6 | 80  | 975  |
| 1975 | 10 | 1  | 6  | 7 | GLADYS | 26.8 | 71.7 | 80  | 975  |
| 1975 | 10 | 1  | 12 | 7 | GLADYS | 27.9 | 72.4 | 80  | 975  |
| 1975 | 10 | 1  | 18 | 7 | GLADYS | 29.4 | 73.0 | 90  | 969  |
| 1975 | 10 | 2  | 0  | 7 | GLADYS | 31.0 | 73.0 | 100 | 954  |
| 1975 | 10 | 2  | 6  | 7 | GLADYS | 32.9 | 72.1 | 110 | 942  |
| 1975 | 10 | 2  | 12 | 7 | GLADYS | 35.3 | 69.8 | 120 | 939  |
| 1975 | 10 | 2  | 18 | 7 | GLADYS | 37.8 | 67.0 | 120 | 939  |
| 1975 | 10 | 3  | 0  | 7 | GLADYS | 40.8 | 62.6 | 110 | 950  |
| 1975 | 10 | 3  | 6  | 7 | GLADYS | 43.7 | 57.0 | 85  | 960  |
| 1975 | 10 | 3  | 12 | 7 | GLADYS | 46.6 | 50.6 | 85  | 960  |
| 1975 | 10 | 3  | 18 | 7 | GLADYS | 50.5 | 45.5 | 75  | 975  |
| 1975 | 10 | 4  | 0  | 7 | GLADYS | 55.0 | 40.0 | 65  | 980  |
| 1975 | 10 | 24 | 18 | 8 | HALLIE | 29.1 | 79.3 | 30  | 1006 |
| 1975 | 10 | 25 | 0  | 8 | HALLIE | 28.8 | 79.0 | 30  | 1006 |
| 1975 | 10 | 25 | 6  | 8 | HALLIE | 29.4 | 79.4 | 30  | 1006 |
| 1975 | 10 | 25 | 12 | 8 | HALLIE | 30.0 | 79.7 | 30  | 1006 |
| 1975 | 10 | 25 | 18 | 8 | HALLIE | 30.2 | 79.8 | 30  | 1006 |
| 1975 | 10 | 26 | 0  | 8 | HALLIE | 30.5 | 79.9 | 30  | 1006 |
| 1975 | 10 | 26 | 6  | 8 | HALLIE | 30.9 | 80.1 | 30  | 1006 |
| 1975 | 10 | 26 | 12 | 8 | HALLIE | 31.8 | 79.6 | 30  | 1005 |
| 1975 | 10 | 26 | 18 | 8 | HALLIE | 32.5 | 78.7 | 35  | 1003 |
| 1975 | 10 | 27 | 0  | 8 | HALLIE | 33.5 | 77.5 | 45  | 1002 |
| 1975 | 10 | 27 | 6  | 8 | HALLIE | 34.5 | 75.5 | 45  | 1002 |
| 1975 | 10 | 27 | 12 | 8 | HALLIE | 35.7 | 73.8 | 45  | 1004 |
| 1975 | 10 | 27 | 18 | 8 | HALLIE | 36.4 | 72.6 | 40  | 1006 |
| 1975 | 10 | 28 | 0  | 8 | HALLIE | 36.9 | 71.4 | 35  | 1008 |

|      |    |    |    |   |           |      |      |    |      |
|------|----|----|----|---|-----------|------|------|----|------|
| 1975 | 12 | 9  | 12 | 9 | SUBTROP 2 | 41.6 | 42.9 | 35 | 997  |
| 1975 | 12 | 9  | 18 | 9 | SUBTROP 2 | 41.1 | 43.0 | 40 | 0    |
| 1975 | 12 | 10 | 0  | 9 | SUBTROP 2 | 40.4 | 43.1 | 45 | 0    |
| 1975 | 12 | 10 | 6  | 9 | SUBTROP 2 | 39.6 | 43.2 | 55 | 0    |
| 1975 | 12 | 10 | 12 | 9 | SUBTROP 2 | 38.3 | 43.4 | 60 | 992  |
| 1975 | 12 | 10 | 18 | 9 | SUBTROP 2 | 36.5 | 43.7 | 55 | 0    |
| 1975 | 12 | 11 | 0  | 9 | SUBTROP 2 | 34.5 | 44.0 | 50 | 0    |
| 1975 | 12 | 11 | 6  | 9 | SUBTROP 2 | 32.5 | 43.7 | 45 | 0    |
| 1975 | 12 | 11 | 12 | 9 | SUBTROP 2 | 30.5 | 42.9 | 40 | 0    |
| 1975 | 12 | 11 | 18 | 9 | SUBTROP 2 | 28.7 | 41.9 | 40 | 985  |
| 1975 | 12 | 12 | 0  | 9 | SUBTROP 2 | 27.4 | 40.5 | 35 | 0    |
| 1975 | 12 | 12 | 6  | 9 | SUBTROP 2 | 26.9 | 38.2 | 35 | 0    |
| 1975 | 12 | 12 | 12 | 9 | SUBTROP 2 | 27.0 | 36.0 | 30 | 1000 |
| 1975 | 12 | 12 | 18 | 9 | SUBTROP 2 | 27.5 | 35.0 | 30 | 0    |
| 1975 | 12 | 13 | 0  | 9 | SUBTROP 2 | 28.5 | 34.6 | 30 | 1005 |
| 1975 | 12 | 13 | 6  | 9 | SUBTROP 2 | 30.2 | 34.4 | 30 | 0    |
| 1975 | 12 | 13 | 12 | 9 | SUBTROP 2 | 32.5 | 34.5 | 25 | 1008 |
| 1976 | 5  | 21 | 12 | 1 | SUBTROP 1 | 24.0 | 89.0 | 20 | 1010 |
| 1976 | 5  | 21 | 18 | 1 | SUBTROP 1 | 24.8 | 89.6 | 20 | 1009 |
| 1976 | 5  | 22 | 0  | 1 | SUBTROP 1 | 25.4 | 90.0 | 25 | 1006 |
| 1976 | 5  | 22 | 6  | 1 | SUBTROP 1 | 26.0 | 90.5 | 25 | 1005 |
| 1976 | 5  | 22 | 12 | 1 | SUBTROP 1 | 27.0 | 90.8 | 30 | 1004 |
| 1976 | 5  | 22 | 18 | 1 | SUBTROP 1 | 26.5 | 90.5 | 30 | 1002 |
| 1976 | 5  | 23 | 0  | 1 | SUBTROP 1 | 26.3 | 89.0 | 35 | 1001 |
| 1976 | 5  | 23 | 6  | 1 | SUBTROP 1 | 27.0 | 88.0 | 35 | 999  |
| 1976 | 5  | 23 | 12 | 1 | SUBTROP 1 | 28.5 | 86.0 | 40 | 998  |
| 1976 | 5  | 23 | 18 | 1 | SUBTROP 1 | 29.8 | 84.0 | 40 | 998  |
| 1976 | 5  | 24 | 0  | 1 | SUBTROP 1 | 31.0 | 82.0 | 40 | 998  |
| 1976 | 5  | 24 | 6  | 1 | SUBTROP 1 | 31.8 | 80.0 | 40 | 998  |
| 1976 | 5  | 24 | 12 | 1 | SUBTROP 1 | 32.8 | 78.0 | 45 | 996  |
| 1976 | 5  | 24 | 18 | 1 | SUBTROP 1 | 33.5 | 76.0 | 45 | 994  |
| 1976 | 5  | 25 | 0  | 1 | SUBTROP 1 | 34.0 | 74.0 | 45 | 994  |
| 1976 | 5  | 25 | 6  | 1 | SUBTROP 1 | 34.8 | 72.0 | 45 | 996  |
| 1976 | 5  | 25 | 12 | 1 | SUBTROP 1 | 35.5 | 69.5 | 40 | 998  |
| 1976 | 5  | 25 | 18 | 1 | SUBTROP 1 | 36.0 | 67.0 | 40 | 998  |
| 1976 | 7  | 28 | 18 | 2 | ANNA      | 28.0 | 52.3 | 20 | 1015 |
| 1976 | 7  | 29 | 0  | 2 | ANNA      | 28.0 | 51.3 | 20 | 0    |
| 1976 | 7  | 29 | 6  | 2 | ANNA      | 28.0 | 50.3 | 20 | 0    |
| 1976 | 7  | 29 | 12 | 2 | ANNA      | 28.0 | 49.3 | 25 | 1012 |
| 1976 | 7  | 29 | 18 | 2 | ANNA      | 28.0 | 48.1 | 25 | 0    |
| 1976 | 7  | 30 | 0  | 2 | ANNA      | 28.3 | 45.6 | 30 | 1005 |
| 1976 | 7  | 30 | 6  | 2 | ANNA      | 29.8 | 42.0 | 35 | 999  |
| 1976 | 7  | 30 | 12 | 2 | ANNA      | 30.1 | 39.9 | 40 | 0    |
| 1976 | 7  | 30 | 18 | 2 | ANNA      | 30.5 | 37.7 | 40 | 0    |

|      |   |    |    |         |      |      |     |      |
|------|---|----|----|---------|------|------|-----|------|
| 1976 | 7 | 31 | 0  | 2 ANNA  | 31.3 | 35.7 | 40  | 0    |
| 1976 | 7 | 31 | 6  | 2 ANNA  | 31.9 | 33.6 | 40  | 0    |
| 1976 | 7 | 31 | 12 | 2 ANNA  | 32.5 | 31.5 | 40  | 0    |
| 1976 | 7 | 31 | 18 | 2 ANNA  | 33.2 | 29.4 | 40  | 0    |
| 1976 | 8 | 1  | 0  | 2 ANNA  | 33.9 | 27.1 | 35  | 0    |
| 1976 | 8 | 1  | 6  | 2 ANNA  | 35.0 | 24.9 | 35  | 0    |
| 1976 | 8 | 1  | 12 | 2 ANNA  | 36.3 | 23.2 | 35  | 0    |
| 1976 | 8 | 1  | 18 | 2 ANNA  | 37.8 | 21.8 | 35  | 0    |
| 1976 | 8 | 2  | 0  | 2 ANNA  | 39.2 | 20.9 | 35  | 0    |
| 1976 | 8 | 2  | 6  | 2 ANNA  | 40.6 | 20.3 | 40  | 0    |
| 1976 | 8 | 2  | 12 | 2 ANNA  | 42.1 | 20.5 | 45  | 0    |
| 1976 | 8 | 2  | 18 | 2 ANNA  | 42.7 | 21.0 | 40  | 1004 |
| 1976 | 8 | 3  | 0  | 2 ANNA  | 42.8 | 21.9 | 35  | 0    |
| 1976 | 8 | 3  | 6  | 2 ANNA  | 42.7 | 22.8 | 35  | 0    |
| 1976 | 8 | 3  | 12 | 2 ANNA  | 42.5 | 23.7 | 30  | 1006 |
| 1976 | 8 | 3  | 18 | 2 ANNA  | 41.9 | 24.9 | 30  | 0    |
| 1976 | 8 | 4  | 0  | 2 ANNA  | 41.2 | 25.9 | 30  | 0    |
| 1976 | 8 | 4  | 6  | 2 ANNA  | 40.4 | 26.7 | 30  | 0    |
| 1976 | 8 | 4  | 12 | 2 ANNA  | 39.5 | 27.5 | 30  | 1008 |
| 1976 | 8 | 4  | 18 | 2 ANNA  | 38.5 | 28.1 | 30  | 0    |
| 1976 | 8 | 5  | 0  | 2 ANNA  | 38.0 | 28.1 | 30  | 0    |
| 1976 | 8 | 5  | 6  | 2 ANNA  | 37.5 | 27.7 | 30  | 0    |
| 1976 | 8 | 5  | 12 | 2 ANNA  | 37.4 | 27.3 | 25  | 1012 |
| 1976 | 8 | 5  | 18 | 2 ANNA  | 37.4 | 26.7 | 25  | 0    |
| 1976 | 8 | 6  | 0  | 2 ANNA  | 37.5 | 26.3 | 25  | 0    |
| 1976 | 8 | 6  | 6  | 2 ANNA  | 37.6 | 25.6 | 25  | 0    |
| 1976 | 8 | 6  | 12 | 2 ANNA  | 37.9 | 25.1 | 25  | 1015 |
| 1976 | 8 | 6  | 18 | 2 ANNA  | 38.2 | 24.6 | 25  | 0    |
| 1976 | 8 | 6  | 6  | 3 BELLE | 26.0 | 72.8 | 25  | 1012 |
| 1976 | 8 | 6  | 12 | 3 BELLE | 26.3 | 73.0 | 25  | 1012 |
| 1976 | 8 | 6  | 18 | 3 BELLE | 26.0 | 73.4 | 30  | 1009 |
| 1976 | 8 | 7  | 0  | 3 BELLE | 25.6 | 73.2 | 40  | 1005 |
| 1976 | 8 | 7  | 6  | 3 BELLE | 26.0 | 73.2 | 45  | 1000 |
| 1976 | 8 | 7  | 12 | 3 BELLE | 26.2 | 73.7 | 55  | 993  |
| 1976 | 8 | 7  | 18 | 3 BELLE | 26.6 | 74.2 | 70  | 985  |
| 1976 | 8 | 8  | 0  | 3 BELLE | 26.9 | 74.6 | 80  | 972  |
| 1976 | 8 | 8  | 6  | 3 BELLE | 27.4 | 75.1 | 90  | 962  |
| 1976 | 8 | 8  | 12 | 3 BELLE | 28.1 | 75.1 | 95  | 959  |
| 1976 | 8 | 8  | 18 | 3 BELLE | 29.5 | 75.3 | 100 | 958  |
| 1976 | 8 | 9  | 0  | 3 BELLE | 30.9 | 75.3 | 105 | 957  |
| 1976 | 8 | 9  | 6  | 3 BELLE | 32.5 | 75.2 | 105 | 959  |
| 1976 | 8 | 9  | 12 | 3 BELLE | 34.4 | 74.7 | 95  | 963  |
| 1976 | 8 | 9  | 18 | 3 BELLE | 36.6 | 74.2 | 90  | 970  |
| 1976 | 8 | 10 | 0  | 3 BELLE | 38.8 | 73.8 | 80  | 977  |

|      |      |    |           |      |      |    |      |
|------|------|----|-----------|------|------|----|------|
| 1976 | 8 10 | 6  | 3 BELLE   | 41.0 | 73.2 | 60 | 983  |
| 1976 | 8 10 | 12 | 3 BELLE   | 42.6 | 72.4 | 35 | 992  |
| 1976 | 8 18 | 12 | 4 CANDICE | 31.7 | 68.2 | 30 | 1007 |
| 1976 | 8 18 | 18 | 4 CANDICE | 33.4 | 67.5 | 35 | 1003 |
| 1976 | 8 19 | 0  | 4 CANDICE | 35.2 | 66.4 | 40 | 996  |
| 1976 | 8 19 | 6  | 4 CANDICE | 36.7 | 65.7 | 40 | 0    |
| 1976 | 8 19 | 12 | 4 CANDICE | 37.7 | 65.0 | 40 | 0    |
| 1976 | 8 19 | 18 | 4 CANDICE | 38.2 | 64.0 | 40 | 999  |
| 1976 | 8 20 | 0  | 4 CANDICE | 38.8 | 63.7 | 35 | 1005 |
| 1976 | 8 20 | 6  | 4 CANDICE | 39.7 | 63.3 | 35 | 1005 |
| 1976 | 8 20 | 12 | 4 CANDICE | 40.2 | 62.0 | 35 | 0    |
| 1976 | 8 20 | 18 | 4 CANDICE | 40.8 | 61.0 | 40 | 997  |
| 1976 | 8 21 | 0  | 4 CANDICE | 41.1 | 59.8 | 40 | 0    |
| 1976 | 8 21 | 6  | 4 CANDICE | 41.2 | 59.3 | 65 | 993  |
| 1976 | 8 21 | 12 | 4 CANDICE | 41.0 | 59.0 | 65 | 989  |
| 1976 | 8 21 | 18 | 4 CANDICE | 40.5 | 58.7 | 65 | 0    |
| 1976 | 8 22 | 0  | 4 CANDICE | 40.3 | 58.2 | 65 | 0    |
| 1976 | 8 22 | 6  | 4 CANDICE | 40.8 | 57.8 | 70 | 0    |
| 1976 | 8 22 | 12 | 4 CANDICE | 41.0 | 57.0 | 70 | 0    |
| 1976 | 8 22 | 18 | 4 CANDICE | 41.3 | 56.4 | 80 | 964  |
| 1976 | 8 23 | 0  | 4 CANDICE | 41.7 | 55.5 | 80 | 0    |
| 1976 | 8 23 | 6  | 4 CANDICE | 42.4 | 54.3 | 80 | 0    |
| 1976 | 8 23 | 12 | 4 CANDICE | 43.1 | 53.2 | 80 | 0    |
| 1976 | 8 23 | 18 | 4 CANDICE | 44.4 | 51.2 | 80 | 971  |
| 1976 | 8 24 | 0  | 4 CANDICE | 45.9 | 48.7 | 80 | 0    |
| 1976 | 8 24 | 6  | 4 CANDICE | 47.3 | 45.5 | 65 | 0    |
| 1976 | 8 24 | 12 | 4 CANDICE | 49.9 | 42.8 | 65 | 0    |
| 1976 | 8 18 | 0  | 5 DOTTIE  | 26.0 | 84.0 | 20 | 1010 |
| 1976 | 8 18 | 6  | 5 DOTTIE  | 25.3 | 83.3 | 20 | 0    |
| 1976 | 8 18 | 12 | 5 DOTTIE  | 24.7 | 82.7 | 20 | 1009 |
| 1976 | 8 18 | 18 | 5 DOTTIE  | 24.5 | 82.5 | 20 | 0    |
| 1976 | 8 19 | 0  | 5 DOTTIE  | 24.6 | 82.2 | 25 | 0    |
| 1976 | 8 19 | 6  | 5 DOTTIE  | 24.8 | 82.0 | 30 | 1003 |
| 1976 | 8 19 | 12 | 5 DOTTIE  | 25.0 | 81.7 | 35 | 0    |
| 1976 | 8 19 | 18 | 5 DOTTIE  | 26.6 | 80.1 | 35 | 1006 |
| 1976 | 8 20 | 0  | 5 DOTTIE  | 28.2 | 80.0 | 40 | 0    |
| 1976 | 8 20 | 6  | 5 DOTTIE  | 29.6 | 80.0 | 45 | 996  |
| 1976 | 8 20 | 12 | 5 DOTTIE  | 30.6 | 80.0 | 40 | 999  |
| 1976 | 8 20 | 18 | 5 DOTTIE  | 32.0 | 80.0 | 35 | 1005 |
| 1976 | 8 21 | 0  | 5 DOTTIE  | 33.0 | 80.0 | 35 | 1005 |
| 1976 | 8 21 | 6  | 5 DOTTIE  | 33.3 | 80.0 | 25 | 1010 |
| 1976 | 8 21 | 12 | 5 DOTTIE  | 33.5 | 80.0 | 20 | 1015 |
| 1976 | 8 20 | 12 | 6 EMMY    | 14.0 | 48.0 | 20 | 1012 |
| 1976 | 8 20 | 18 | 6 EMMY    | 14.0 | 49.3 | 20 | 0    |

|      |      |    |        |      |      |    |      |
|------|------|----|--------|------|------|----|------|
| 1976 | 8 21 | 0  | 6 EMMY | 14.0 | 50.6 | 20 | 0    |
| 1976 | 8 21 | 6  | 6 EMMY | 14.1 | 51.8 | 20 | 0    |
| 1976 | 8 21 | 12 | 6 EMMY | 14.4 | 52.8 | 25 | 1012 |
| 1976 | 8 21 | 18 | 6 EMMY | 14.8 | 53.5 | 25 | 0    |
| 1976 | 8 22 | 0  | 6 EMMY | 15.2 | 54.2 | 25 | 1010 |
| 1976 | 8 22 | 6  | 6 EMMY | 15.8 | 55.2 | 30 | 1009 |
| 1976 | 8 22 | 12 | 6 EMMY | 16.2 | 56.0 | 35 | 1006 |
| 1976 | 8 22 | 18 | 6 EMMY | 17.0 | 57.2 | 40 | 1004 |
| 1976 | 8 23 | 0  | 6 EMMY | 17.8 | 58.6 | 45 | 0    |
| 1976 | 8 23 | 6  | 6 EMMY | 18.6 | 60.0 | 50 | 997  |
| 1976 | 8 23 | 12 | 6 EMMY | 19.4 | 61.0 | 55 | 0    |
| 1976 | 8 23 | 18 | 6 EMMY | 20.2 | 62.0 | 55 | 996  |
| 1976 | 8 24 | 0  | 6 EMMY | 21.3 | 63.2 | 55 | 998  |
| 1976 | 8 24 | 6  | 6 EMMY | 22.7 | 64.0 | 55 | 999  |
| 1976 | 8 24 | 12 | 6 EMMY | 23.8 | 64.5 | 55 | 999  |
| 1976 | 8 24 | 18 | 6 EMMY | 24.5 | 64.8 | 60 | 995  |
| 1976 | 8 25 | 0  | 6 EMMY | 25.3 | 64.2 | 60 | 0    |
| 1976 | 8 25 | 6  | 6 EMMY | 26.0 | 63.4 | 60 | 991  |
| 1976 | 8 25 | 12 | 6 EMMY | 26.5 | 62.1 | 65 | 990  |
| 1976 | 8 25 | 18 | 6 EMMY | 26.6 | 60.4 | 65 | 991  |
| 1976 | 8 26 | 0  | 6 EMMY | 26.8 | 59.0 | 70 | 988  |
| 1976 | 8 26 | 6  | 6 EMMY | 27.0 | 57.8 | 75 | 984  |
| 1976 | 8 26 | 12 | 6 EMMY | 27.2 | 56.2 | 80 | 980  |
| 1976 | 8 26 | 18 | 6 EMMY | 27.7 | 54.8 | 85 | 976  |
| 1976 | 8 27 | 0  | 6 EMMY | 28.9 | 53.6 | 85 | 0    |
| 1976 | 8 27 | 6  | 6 EMMY | 29.8 | 53.4 | 85 | 0    |
| 1976 | 8 27 | 12 | 6 EMMY | 30.9 | 53.7 | 85 | 975  |
| 1976 | 8 27 | 18 | 6 EMMY | 31.8 | 54.0 | 85 | 0    |
| 1976 | 8 28 | 0  | 6 EMMY | 32.5 | 55.2 | 85 | 0    |
| 1976 | 8 28 | 6  | 6 EMMY | 33.0 | 56.0 | 85 | 0    |
| 1976 | 8 28 | 12 | 6 EMMY | 33.5 | 56.6 | 85 | 975  |
| 1976 | 8 28 | 18 | 6 EMMY | 34.0 | 57.2 | 85 | 0    |
| 1976 | 8 29 | 0  | 6 EMMY | 34.4 | 57.4 | 85 | 0    |
| 1976 | 8 29 | 6  | 6 EMMY | 34.8 | 57.4 | 85 | 0    |
| 1976 | 8 29 | 12 | 6 EMMY | 35.0 | 56.8 | 90 | 974  |
| 1976 | 8 29 | 18 | 6 EMMY | 35.0 | 55.5 | 90 | 0    |
| 1976 | 8 30 | 0  | 6 EMMY | 35.0 | 54.5 | 90 | 0    |
| 1976 | 8 30 | 6  | 6 EMMY | 35.0 | 53.3 | 90 | 0    |
| 1976 | 8 30 | 12 | 6 EMMY | 34.9 | 52.0 | 90 | 975  |
| 1976 | 8 30 | 18 | 6 EMMY | 34.9 | 50.5 | 90 | 0    |
| 1976 | 8 31 | 0  | 6 EMMY | 34.9 | 48.7 | 90 | 0    |
| 1976 | 8 31 | 6  | 6 EMMY | 34.9 | 46.8 | 90 | 0    |
| 1976 | 8 31 | 12 | 6 EMMY | 35.1 | 44.9 | 85 | 977  |
| 1976 | 8 31 | 18 | 6 EMMY | 35.2 | 42.8 | 85 | 0    |

|      |   |    |    |           |      |      |     |      |
|------|---|----|----|-----------|------|------|-----|------|
| 1976 | 9 | 1  | 0  | 6 EMMY    | 35.5 | 40.5 | 85  | 0    |
| 1976 | 9 | 1  | 6  | 6 EMMY    | 35.4 | 38.5 | 85  | 0    |
| 1976 | 9 | 1  | 12 | 6 EMMY    | 35.1 | 36.6 | 80  | 975  |
| 1976 | 9 | 1  | 18 | 6 EMMY    | 34.8 | 34.8 | 80  | 0    |
| 1976 | 9 | 2  | 0  | 6 EMMY    | 34.0 | 33.2 | 80  | 0    |
| 1976 | 9 | 2  | 6  | 6 EMMY    | 33.6 | 32.0 | 80  | 0    |
| 1976 | 9 | 2  | 12 | 6 EMMY    | 33.6 | 30.5 | 80  | 0    |
| 1976 | 9 | 2  | 18 | 6 EMMY    | 34.2 | 29.4 | 80  | 0    |
| 1976 | 9 | 3  | 0  | 6 EMMY    | 35.2 | 28.7 | 75  | 980  |
| 1976 | 9 | 3  | 6  | 6 EMMY    | 36.2 | 28.3 | 75  | 0    |
| 1976 | 9 | 3  | 12 | 6 EMMY    | 37.2 | 28.0 | 75  | 0    |
| 1976 | 9 | 3  | 18 | 6 EMMY    | 38.0 | 27.2 | 70  | 984  |
| 1976 | 9 | 4  | 0  | 6 EMMY    | 38.8 | 26.8 | 65  | 988  |
| 1976 | 9 | 4  | 6  | 6 EMMY    | 39.6 | 25.8 | 65  | 994  |
| 1976 | 9 | 4  | 12 | 6 EMMY    | 40.5 | 25.0 | 50  | 998  |
| 1976 | 9 | 4  | 18 | 6 EMMY    | 41.0 | 24.0 | 30  | 1002 |
| 1976 | 8 | 27 | 12 | 7 FRANCES | 12.5 | 37.5 | 25  | 1009 |
| 1976 | 8 | 27 | 18 | 7 FRANCES | 13.0 | 39.0 | 25  | 0    |
| 1976 | 8 | 28 | 0  | 7 FRANCES | 13.5 | 40.5 | 25  | 0    |
| 1976 | 8 | 28 | 6  | 7 FRANCES | 13.8 | 42.1 | 25  | 0    |
| 1976 | 8 | 28 | 12 | 7 FRANCES | 14.3 | 43.7 | 30  | 0    |
| 1976 | 8 | 28 | 18 | 7 FRANCES | 14.7 | 45.3 | 50  | 1002 |
| 1976 | 8 | 29 | 0  | 7 FRANCES | 15.4 | 46.8 | 50  | 0    |
| 1976 | 8 | 29 | 6  | 7 FRANCES | 16.1 | 48.4 | 50  | 0    |
| 1976 | 8 | 29 | 12 | 7 FRANCES | 16.6 | 49.6 | 50  | 998  |
| 1976 | 8 | 29 | 18 | 7 FRANCES | 17.5 | 50.5 | 60  | 994  |
| 1976 | 8 | 30 | 0  | 7 FRANCES | 18.3 | 51.6 | 65  | 991  |
| 1976 | 8 | 30 | 6  | 7 FRANCES | 18.9 | 52.3 | 65  | 0    |
| 1976 | 8 | 30 | 12 | 7 FRANCES | 19.4 | 53.3 | 65  | 0    |
| 1976 | 8 | 30 | 18 | 7 FRANCES | 20.2 | 54.2 | 65  | 987  |
| 1976 | 8 | 31 | 0  | 7 FRANCES | 21.0 | 54.9 | 65  | 980  |
| 1976 | 8 | 31 | 6  | 7 FRANCES | 22.0 | 55.1 | 65  | 0    |
| 1976 | 8 | 31 | 12 | 7 FRANCES | 23.1 | 55.2 | 75  | 975  |
| 1976 | 8 | 31 | 18 | 7 FRANCES | 24.2 | 55.2 | 75  | 0    |
| 1976 | 9 | 1  | 0  | 7 FRANCES | 25.3 | 54.9 | 90  | 968  |
| 1976 | 9 | 1  | 6  | 7 FRANCES | 26.3 | 54.3 | 100 | 963  |
| 1976 | 9 | 1  | 12 | 7 FRANCES | 27.2 | 53.7 | 95  | 966  |
| 1976 | 9 | 1  | 18 | 7 FRANCES | 27.8 | 52.6 | 95  | 0    |
| 1976 | 9 | 2  | 0  | 7 FRANCES | 28.2 | 51.3 | 95  | 0    |
| 1976 | 9 | 2  | 6  | 7 FRANCES | 28.2 | 50.1 | 95  | 0    |
| 1976 | 9 | 2  | 12 | 7 FRANCES | 28.3 | 48.7 | 95  | 0    |
| 1976 | 9 | 2  | 18 | 7 FRANCES | 28.5 | 47.1 | 85  | 0    |
| 1976 | 9 | 3  | 0  | 7 FRANCES | 28.9 | 45.1 | 75  | 0    |
| 1976 | 9 | 3  | 6  | 7 FRANCES | 29.0 | 42.9 | 65  | 0    |

|      |   |    |    |   |           |      |      |    |      |
|------|---|----|----|---|-----------|------|------|----|------|
| 1976 | 9 | 3  | 12 | 7 | FRANCES   | 29.7 | 40.8 | 65 | 0    |
| 1976 | 9 | 3  | 18 | 7 | FRANCES   | 30.6 | 39.0 | 65 | 0    |
| 1976 | 9 | 4  | 0  | 7 | FRANCES   | 32.0 | 37.2 | 65 | 992  |
| 1976 | 9 | 4  | 6  | 7 | FRANCES   | 33.4 | 35.6 | 65 | 0    |
| 1976 | 9 | 4  | 12 | 7 | FRANCES   | 34.9 | 34.1 | 55 | 992  |
| 1976 | 9 | 4  | 18 | 7 | FRANCES   | 36.4 | 32.5 | 55 | 0    |
| 1976 | 9 | 5  | 0  | 7 | FRANCES   | 37.8 | 30.8 | 55 | 0    |
| 1976 | 9 | 5  | 6  | 7 | FRANCES   | 39.4 | 29.3 | 55 | 0    |
| 1976 | 9 | 5  | 12 | 7 | FRANCES   | 41.0 | 28.0 | 55 | 0    |
| 1976 | 9 | 5  | 18 | 7 | FRANCES   | 42.1 | 27.2 | 55 | 0    |
| 1976 | 9 | 6  | 0  | 7 | FRANCES   | 43.5 | 27.1 | 55 | 0    |
| 1976 | 9 | 6  | 6  | 7 | FRANCES   | 42.8 | 28.6 | 55 | 0    |
| 1976 | 9 | 6  | 12 | 7 | FRANCES   | 42.0 | 28.2 | 55 | 0    |
| 1976 | 9 | 6  | 18 | 7 | FRANCES   | 41.9 | 27.6 | 45 | 998  |
| 1976 | 9 | 7  | 0  | 7 | FRANCES   | 41.8 | 27.0 | 45 | 0    |
| 1976 | 9 | 7  | 6  | 7 | FRANCES   | 41.7 | 26.3 | 45 | 0    |
| 1976 | 9 | 7  | 12 | 7 | FRANCES   | 41.6 | 25.7 | 45 | 0    |
| 1976 | 9 | 13 | 12 | 8 | SUBTROP 3 | 28.0 | 81.5 | 15 | 1017 |
| 1976 | 9 | 13 | 18 | 8 | SUBTROP 3 | 28.7 | 81.5 | 15 | 1016 |
| 1976 | 9 | 14 | 0  | 8 | SUBTROP 3 | 29.5 | 81.5 | 20 | 1015 |
| 1976 | 9 | 14 | 6  | 8 | SUBTROP 3 | 30.2 | 81.5 | 25 | 1014 |
| 1976 | 9 | 14 | 12 | 8 | SUBTROP 3 | 31.0 | 81.2 | 35 | 1013 |
| 1976 | 9 | 14 | 18 | 8 | SUBTROP 3 | 31.6 | 81.0 | 35 | 1012 |
| 1976 | 9 | 15 | 0  | 8 | SUBTROP 3 | 32.2 | 80.8 | 40 | 1011 |
| 1976 | 9 | 15 | 6  | 8 | SUBTROP 3 | 33.0 | 80.4 | 35 | 1011 |
| 1976 | 9 | 15 | 12 | 8 | SUBTROP 3 | 33.8 | 80.0 | 35 | 1011 |
| 1976 | 9 | 15 | 18 | 8 | SUBTROP 3 | 34.6 | 79.5 | 30 | 1012 |
| 1976 | 9 | 16 | 0  | 8 | SUBTROP 3 | 35.0 | 79.0 | 30 | 1012 |
| 1976 | 9 | 16 | 6  | 8 | SUBTROP 3 | 35.5 | 78.9 | 25 | 1012 |
| 1976 | 9 | 16 | 12 | 8 | SUBTROP 3 | 36.0 | 78.8 | 20 | 1013 |
| 1976 | 9 | 16 | 18 | 8 | SUBTROP 3 | 36.5 | 78.4 | 15 | 1013 |
| 1976 | 9 | 17 | 0  | 8 | SUBTROP 3 | 37.0 | 78.0 | 15 | 1014 |
| 1976 | 9 | 26 | 12 | 9 | GLORIA    | 23.0 | 58.0 | 20 | 1009 |
| 1976 | 9 | 26 | 18 | 9 | GLORIA    | 23.7 | 58.1 | 20 | 1007 |
| 1976 | 9 | 27 | 0  | 9 | GLORIA    | 24.3 | 58.2 | 25 | 1005 |
| 1976 | 9 | 27 | 6  | 9 | GLORIA    | 24.9 | 58.1 | 30 | 1001 |
| 1976 | 9 | 27 | 12 | 9 | GLORIA    | 25.7 | 58.0 | 35 | 997  |
| 1976 | 9 | 27 | 18 | 9 | GLORIA    | 26.3 | 58.0 | 45 | 994  |
| 1976 | 9 | 28 | 0  | 9 | GLORIA    | 27.0 | 58.0 | 55 | 993  |
| 1976 | 9 | 28 | 6  | 9 | GLORIA    | 27.5 | 58.2 | 60 | 992  |
| 1976 | 9 | 28 | 12 | 9 | GLORIA    | 27.8 | 58.6 | 60 | 992  |
| 1976 | 9 | 28 | 18 | 9 | GLORIA    | 28.2 | 59.0 | 60 | 991  |
| 1976 | 9 | 29 | 0  | 9 | GLORIA    | 28.6 | 59.5 | 60 | 988  |
| 1976 | 9 | 29 | 6  | 9 | GLORIA    | 29.1 | 59.8 | 65 | 984  |



|      |    |    |    |    |        |      |      |    |      |
|------|----|----|----|----|--------|------|------|----|------|
| 1976 | 9  | 29 | 12 | 9  | GLORIA | 29.7 | 60.2 | 65 | 979  |
| 1976 | 9  | 29 | 18 | 9  | GLORIA | 30.2 | 60.3 | 70 | 973  |
| 1976 | 9  | 30 | 0  | 9  | GLORIA | 31.1 | 60.2 | 80 | 970  |
| 1976 | 9  | 30 | 6  | 9  | GLORIA | 32.2 | 59.8 | 85 | 971  |
| 1976 | 9  | 30 | 12 | 9  | GLORIA | 33.1 | 58.8 | 90 | 977  |
| 1976 | 9  | 30 | 18 | 9  | GLORIA | 34.0 | 57.5 | 90 | 981  |
| 1976 | 10 | 1  | 0  | 9  | GLORIA | 34.7 | 56.1 | 90 | 985  |
| 1976 | 10 | 1  | 6  | 9  | GLORIA | 35.3 | 54.8 | 85 | 988  |
| 1976 | 10 | 1  | 12 | 9  | GLORIA | 35.7 | 53.7 | 80 | 990  |
| 1976 | 10 | 1  | 18 | 9  | GLORIA | 36.1 | 52.6 | 75 | 992  |
| 1976 | 10 | 2  | 0  | 9  | GLORIA | 36.4 | 51.7 | 70 | 993  |
| 1976 | 10 | 2  | 6  | 9  | GLORIA | 36.6 | 50.8 | 60 | 994  |
| 1976 | 10 | 2  | 12 | 9  | GLORIA | 36.8 | 49.9 | 60 | 995  |
| 1976 | 10 | 2  | 18 | 9  | GLORIA | 36.9 | 49.0 | 55 | 996  |
| 1976 | 10 | 3  | 0  | 9  | GLORIA | 36.8 | 48.3 | 50 | 997  |
| 1976 | 10 | 3  | 6  | 9  | GLORIA | 36.4 | 47.6 | 45 | 998  |
| 1976 | 10 | 3  | 12 | 9  | GLORIA | 36.2 | 46.9 | 40 | 999  |
| 1976 | 10 | 3  | 18 | 9  | GLORIA | 35.8 | 45.8 | 40 | 1001 |
| 1976 | 10 | 4  | 0  | 9  | GLORIA | 35.7 | 44.6 | 35 | 1002 |
| 1976 | 10 | 4  | 6  | 9  | GLORIA | 36.0 | 43.0 | 30 | 1003 |
| 1976 | 10 | 4  | 12 | 9  | GLORIA | 36.5 | 41.4 | 30 | 1005 |
| 1976 | 10 | 4  | 18 | 9  | GLORIA | 37.4 | 38.7 | 30 | 1006 |
| 1976 | 10 | 5  | 0  | 9  | GLORIA | 39.0 | 35.0 | 30 | 1008 |
| 1976 | 10 | 22 | 18 | 10 | HOLLY  | 19.1 | 55.8 | 25 | 1006 |
| 1976 | 10 | 23 | 0  | 10 | HOLLY  | 19.8 | 56.4 | 25 | 0    |
| 1976 | 10 | 23 | 6  | 10 | HOLLY  | 20.9 | 56.7 | 25 | 0    |
| 1976 | 10 | 23 | 12 | 10 | HOLLY  | 22.0 | 57.0 | 25 | 0    |
| 1976 | 10 | 23 | 18 | 10 | HOLLY  | 22.5 | 58.0 | 35 | 1002 |
| 1976 | 10 | 24 | 0  | 10 | HOLLY  | 23.3 | 58.3 | 35 | 0    |
| 1976 | 10 | 24 | 6  | 10 | HOLLY  | 24.2 | 58.2 | 45 | 995  |
| 1976 | 10 | 24 | 12 | 10 | HOLLY  | 24.9 | 58.1 | 65 | 990  |
| 1976 | 10 | 24 | 18 | 10 | HOLLY  | 25.8 | 57.8 | 65 | 0    |
| 1976 | 10 | 25 | 0  | 10 | HOLLY  | 27.2 | 57.5 | 65 | 995  |
| 1976 | 10 | 25 | 6  | 10 | HOLLY  | 28.7 | 56.7 | 65 | 0    |
| 1976 | 10 | 25 | 12 | 10 | HOLLY  | 30.4 | 55.7 | 50 | 1000 |
| 1976 | 10 | 25 | 18 | 10 | HOLLY  | 31.7 | 54.0 | 50 | 0    |
| 1976 | 10 | 26 | 0  | 10 | HOLLY  | 32.2 | 53.0 | 50 | 0    |
| 1976 | 10 | 26 | 6  | 10 | HOLLY  | 32.3 | 52.1 | 50 | 0    |
| 1976 | 10 | 26 | 12 | 10 | HOLLY  | 32.5 | 51.3 | 40 | 0    |
| 1976 | 10 | 26 | 18 | 10 | HOLLY  | 32.6 | 50.3 | 40 | 0    |
| 1976 | 10 | 27 | 0  | 10 | HOLLY  | 33.2 | 50.1 | 40 | 0    |
| 1976 | 10 | 27 | 6  | 10 | HOLLY  | 33.9 | 50.0 | 40 | 0    |
| 1976 | 10 | 27 | 12 | 10 | HOLLY  | 34.6 | 49.5 | 40 | 0    |
| 1976 | 10 | 27 | 18 | 10 | HOLLY  | 35.6 | 48.0 | 40 | 0    |

|                        |      |       |     |      |
|------------------------|------|-------|-----|------|
| 1976 10 28 0 10 HOLLY  | 37.1 | 45.9  | 40  | 0    |
| 1976 10 28 6 10 HOLLY  | 38.8 | 43.5  | 35  | 0    |
| 1976 10 28 12 10 HOLLY | 42.1 | 39.5  | 35  | 0    |
| 1976 10 28 18 10 HOLLY | 44.8 | 35.0  | 35  | 0    |
| 1976 10 29 0 10 HOLLY  | 46.5 | 30.0  | 35  | 1000 |
| 1977 8 29 12 1 ANITA   | 26.9 | 88.4  | 20  | 1012 |
| 1977 8 29 18 1 ANITA   | 27.0 | 88.9  | 25  | 1010 |
| 1977 8 30 0 1 ANITA    | 26.9 | 89.4  | 30  | 1009 |
| 1977 8 30 6 1 ANITA    | 26.8 | 89.8  | 40  | 1006 |
| 1977 8 30 12 1 ANITA   | 26.7 | 90.3  | 50  | 1003 |
| 1977 8 30 18 1 ANITA   | 26.5 | 90.6  | 65  | 997  |
| 1977 8 31 0 1 ANITA    | 26.4 | 91.0  | 70  | 991  |
| 1977 8 31 6 1 ANITA    | 26.3 | 91.4  | 75  | 988  |
| 1977 8 31 12 1 ANITA   | 26.2 | 91.8  | 75  | 986  |
| 1977 8 31 18 1 ANITA   | 26.1 | 92.3  | 80  | 985  |
| 1977 9 1 0 1 ANITA     | 25.9 | 92.8  | 80  | 979  |
| 1977 9 1 6 1 ANITA     | 25.8 | 93.7  | 85  | 972  |
| 1977 9 1 12 1 ANITA    | 25.5 | 94.7  | 90  | 963  |
| 1977 9 1 18 1 ANITA    | 25.2 | 95.5  | 110 | 945  |
| 1977 9 2 0 1 ANITA     | 24.6 | 96.2  | 140 | 931  |
| 1977 9 2 6 1 ANITA     | 24.2 | 97.1  | 150 | 926  |
| 1977 9 2 12 1 ANITA    | 23.7 | 98.0  | 120 | 940  |
| 1977 9 2 18 1 ANITA    | 23.1 | 99.2  | 70  | 978  |
| 1977 9 3 0 1 ANITA     | 22.5 | 101.0 | 40  | 998  |
| 1977 9 3 6 1 ANITA     | 22.0 | 103.0 | 25  | 1011 |
| 1977 9 3 6 2 BABE      | 26.8 | 86.3  | 25  | 1007 |
| 1977 9 3 12 2 BABE     | 27.4 | 87.3  | 30  | 0    |
| 1977 9 3 18 2 BABE     | 27.6 | 88.5  | 35  | 1005 |
| 1977 9 4 0 2 BABE      | 27.4 | 89.7  | 35  | 0    |
| 1977 9 4 6 2 BABE      | 26.6 | 90.5  | 40  | 0    |
| 1977 9 4 12 2 BABE     | 26.8 | 91.7  | 45  | 1003 |
| 1977 9 4 18 2 BABE     | 27.5 | 91.7  | 50  | 1000 |
| 1977 9 5 0 2 BABE      | 28.0 | 91.6  | 60  | 0    |
| 1977 9 5 6 2 BABE      | 28.7 | 91.4  | 65  | 995  |
| 1977 9 5 12 2 BABE     | 29.5 | 91.2  | 65  | 0    |
| 1977 9 5 18 2 BABE     | 29.8 | 91.6  | 50  | 1000 |
| 1977 9 6 0 2 BABE      | 30.2 | 91.3  | 30  | 0    |
| 1977 9 6 6 2 BABE      | 30.6 | 90.7  | 30  | 0    |
| 1977 9 6 12 2 BABE     | 31.1 | 90.0  | 30  | 0    |
| 1977 9 6 18 2 BABE     | 31.7 | 89.4  | 25  | 1004 |
| 1977 9 7 0 2 BABE      | 32.4 | 88.8  | 25  | 0    |
| 1977 9 7 6 2 BABE      | 33.2 | 88.0  | 25  | 0    |
| 1977 9 7 12 2 BABE     | 33.8 | 87.1  | 25  | 1008 |
| 1977 9 7 18 2 BABE     | 34.3 | 85.8  | 25  | 0    |

|      |   |    |    |   |         |      |      |    |      |
|------|---|----|----|---|---------|------|------|----|------|
| 1977 | 9 | 8  | 0  | 2 | BABE    | 34.5 | 84.8 | 25 | 1010 |
| 1977 | 9 | 8  | 6  | 2 | BABE    | 34.6 | 83.9 | 25 | 0    |
| 1977 | 9 | 8  | 12 | 2 | BABE    | 34.7 | 82.6 | 25 | 0    |
| 1977 | 9 | 8  | 18 | 2 | BABE    | 34.8 | 81.3 | 25 | 0    |
| 1977 | 9 | 9  | 0  | 2 | BABE    | 34.8 | 80.2 | 25 | 1012 |
| 1977 | 9 | 5  | 12 | 3 | CLARA   | 32.8 | 80.0 | 20 | 1015 |
| 1977 | 9 | 5  | 18 | 3 | CLARA   | 33.2 | 79.0 | 20 | 1014 |
| 1977 | 9 | 6  | 0  | 3 | CLARA   | 33.6 | 78.2 | 20 | 1013 |
| 1977 | 9 | 6  | 6  | 3 | CLARA   | 33.8 | 77.6 | 25 | 1012 |
| 1977 | 9 | 6  | 12 | 3 | CLARA   | 34.0 | 77.0 | 25 | 1011 |
| 1977 | 9 | 6  | 18 | 3 | CLARA   | 34.2 | 76.4 | 25 | 1010 |
| 1977 | 9 | 7  | 0  | 3 | CLARA   | 34.4 | 75.8 | 30 | 1010 |
| 1977 | 9 | 7  | 6  | 3 | CLARA   | 34.6 | 75.0 | 30 | 1010 |
| 1977 | 9 | 7  | 12 | 3 | CLARA   | 34.7 | 74.3 | 30 | 1010 |
| 1977 | 9 | 7  | 18 | 3 | CLARA   | 34.9 | 73.0 | 30 | 1010 |
| 1977 | 9 | 8  | 0  | 3 | CLARA   | 35.1 | 71.7 | 35 | 1006 |
| 1977 | 9 | 8  | 6  | 3 | CLARA   | 35.3 | 69.7 | 45 | 1001 |
| 1977 | 9 | 8  | 12 | 3 | CLARA   | 35.5 | 67.7 | 65 | 993  |
| 1977 | 9 | 8  | 18 | 3 | CLARA   | 35.6 | 66.2 | 65 | 994  |
| 1977 | 9 | 9  | 0  | 3 | CLARA   | 35.5 | 64.6 | 65 | 998  |
| 1977 | 9 | 9  | 6  | 3 | CLARA   | 34.8 | 63.5 | 60 | 1000 |
| 1977 | 9 | 9  | 12 | 3 | CLARA   | 34.0 | 62.8 | 55 | 999  |
| 1977 | 9 | 9  | 18 | 3 | CLARA   | 33.4 | 62.8 | 50 | 1001 |
| 1977 | 9 | 10 | 0  | 3 | CLARA   | 32.8 | 63.2 | 45 | 1000 |
| 1977 | 9 | 10 | 6  | 3 | CLARA   | 32.8 | 63.6 | 40 | 1000 |
| 1977 | 9 | 10 | 12 | 3 | CLARA   | 33.0 | 63.8 | 45 | 1001 |
| 1977 | 9 | 10 | 18 | 3 | CLARA   | 33.5 | 63.7 | 45 | 1001 |
| 1977 | 9 | 11 | 0  | 3 | CLARA   | 34.2 | 63.2 | 45 | 1002 |
| 1977 | 9 | 11 | 6  | 3 | CLARA   | 34.8 | 62.5 | 45 | 1002 |
| 1977 | 9 | 11 | 12 | 3 | CLARA   | 36.0 | 61.5 | 45 | 1001 |
| 1977 | 9 | 11 | 18 | 3 | CLARA   | 38.0 | 59.8 | 45 | 1001 |
| 1977 | 9 | 12 | 0  | 3 | CLARA   | 40.5 | 57.5 | 45 | 1001 |
| 1977 | 9 | 26 | 18 | 4 | DOROTHY | 28.5 | 71.5 | 20 | 1010 |
| 1977 | 9 | 27 | 0  | 4 | DOROTHY | 29.5 | 69.8 | 20 | 1009 |
| 1977 | 9 | 27 | 6  | 4 | DOROTHY | 30.2 | 67.9 | 30 | 1005 |
| 1977 | 9 | 27 | 12 | 4 | DOROTHY | 30.9 | 65.8 | 40 | 1002 |
| 1977 | 9 | 27 | 18 | 4 | DOROTHY | 31.9 | 63.6 | 45 | 1000 |
| 1977 | 9 | 28 | 0  | 4 | DOROTHY | 33.2 | 61.8 | 50 | 996  |
| 1977 | 9 | 28 | 6  | 4 | DOROTHY | 34.4 | 60.8 | 60 | 992  |
| 1977 | 9 | 28 | 12 | 4 | DOROTHY | 35.5 | 59.7 | 65 | 988  |
| 1977 | 9 | 28 | 18 | 4 | DOROTHY | 37.0 | 58.8 | 70 | 984  |
| 1977 | 9 | 29 | 0  | 4 | DOROTHY | 38.3 | 57.0 | 75 | 980  |
| 1977 | 9 | 29 | 6  | 4 | DOROTHY | 40.0 | 55.5 | 70 | 984  |
| 1977 | 9 | 29 | 12 | 4 | DOROTHY | 42.0 | 54.0 | 65 | 988  |

|      |          |             |      |      |    |      |
|------|----------|-------------|------|------|----|------|
| 1977 | 9 29 18  | 4 DOROTHY   | 44.5 | 53.0 | 60 | 990  |
| 1977 | 9 30 0   | 4 DOROTHY   | 47.0 | 51.0 | 50 | 995  |
| 1977 | 9 30 6   | 4 DOROTHY   | 49.5 | 48.5 | 45 | 1000 |
| 1977 | 10 13 18 | 5 EVELYN    | 26.9 | 62.9 | 30 | 1010 |
| 1977 | 10 14 0  | 5 EVELYN    | 29.0 | 64.0 | 30 | 1008 |
| 1977 | 10 14 6  | 5 EVELYN    | 30.9 | 64.9 | 35 | 1005 |
| 1977 | 10 14 12 | 5 EVELYN    | 33.0 | 64.9 | 40 | 1002 |
| 1977 | 10 14 18 | 5 EVELYN    | 35.9 | 64.4 | 50 | 999  |
| 1977 | 10 15 0  | 5 EVELYN    | 39.2 | 63.3 | 65 | 994  |
| 1977 | 10 15 6  | 5 EVELYN    | 42.4 | 61.5 | 70 | 996  |
| 1977 | 10 15 12 | 5 EVELYN    | 45.5 | 60.1 | 70 | 998  |
| 1977 | 10 15 18 | 5 EVELYN    | 47.4 | 59.2 | 70 | 999  |
| 1977 | 10 16 0  | 5 EVELYN    | 49.1 | 58.3 | 45 | 1000 |
| 1977 | 10 16 18 | 6 FRIEDA    | 17.3 | 83.2 | 25 | 1011 |
| 1977 | 10 17 0  | 6 FRIEDA    | 17.3 | 83.4 | 30 | 1010 |
| 1977 | 10 17 6  | 6 FRIEDA    | 17.3 | 83.6 | 30 | 1009 |
| 1977 | 10 17 12 | 6 FRIEDA    | 17.2 | 83.9 | 40 | 1008 |
| 1977 | 10 17 18 | 6 FRIEDA    | 17.2 | 84.4 | 45 | 1007 |
| 1977 | 10 18 0  | 6 FRIEDA    | 17.3 | 85.0 | 50 | 1006 |
| 1977 | 10 18 6  | 6 FRIEDA    | 17.4 | 85.8 | 40 | 1005 |
| 1977 | 10 18 12 | 6 FRIEDA    | 17.5 | 86.6 | 30 | 1006 |
| 1977 | 10 18 18 | 6 FRIEDA    | 17.6 | 87.4 | 25 | 1008 |
| 1977 | 10 19 0  | 6 FRIEDA    | 17.6 | 88.3 | 20 | 1010 |
| 1978 | 1 18 12  | 1 SUBTROP 1 | 22.0 | 44.0 | 25 | 1013 |
| 1978 | 1 18 18  | 1 SUBTROP 1 | 22.5 | 45.0 | 25 | 0    |
| 1978 | 1 19 0   | 1 SUBTROP 1 | 23.0 | 46.0 | 30 | 0    |
| 1978 | 1 19 6   | 1 SUBTROP 1 | 23.3 | 46.7 | 30 | 0    |
| 1978 | 1 19 12  | 1 SUBTROP 1 | 23.5 | 47.6 | 35 | 1008 |
| 1978 | 1 19 18  | 1 SUBTROP 1 | 23.8 | 48.3 | 35 | 0    |
| 1978 | 1 20 0   | 1 SUBTROP 1 | 24.0 | 49.5 | 35 | 1005 |
| 1978 | 1 20 6   | 1 SUBTROP 1 | 23.9 | 50.5 | 35 | 0    |
| 1978 | 1 20 12  | 1 SUBTROP 1 | 23.3 | 52.0 | 40 | 1002 |
| 1978 | 1 20 18  | 1 SUBTROP 1 | 22.9 | 53.5 | 40 | 0    |
| 1978 | 1 21 0   | 1 SUBTROP 1 | 22.8 | 54.8 | 40 | 0    |
| 1978 | 1 21 6   | 1 SUBTROP 1 | 22.7 | 56.0 | 40 | 0    |
| 1978 | 1 21 12  | 1 SUBTROP 1 | 22.6 | 57.3 | 40 | 0    |
| 1978 | 1 21 18  | 1 SUBTROP 1 | 22.4 | 58.8 | 40 | 1003 |
| 1978 | 1 22 0   | 1 SUBTROP 1 | 22.0 | 59.8 | 35 | 0    |
| 1978 | 1 22 6   | 1 SUBTROP 1 | 21.7 | 60.8 | 35 | 0    |
| 1978 | 1 22 12  | 1 SUBTROP 1 | 21.4 | 61.8 | 30 | 0    |
| 1978 | 1 22 18  | 1 SUBTROP 1 | 21.0 | 62.9 | 25 | 1010 |
| 1978 | 1 23 0   | 1 SUBTROP 1 | 21.0 | 64.0 | 25 | 0    |
| 1978 | 7 30 18  | 2 AMELIA    | 25.7 | 97.0 | 30 | 1006 |
| 1978 | 7 31 0   | 2 AMELIA    | 26.4 | 97.4 | 45 | 1005 |

|      |   |    |    |   |        |      |      |    |      |
|------|---|----|----|---|--------|------|------|----|------|
| 1978 | 7 | 31 | 6  | 2 | AMELIA | 27.2 | 97.8 | 40 | 1007 |
| 1978 | 7 | 31 | 12 | 2 | AMELIA | 28.0 | 98.2 | 35 | 1008 |
| 1978 | 7 | 31 | 18 | 2 | AMELIA | 28.6 | 98.7 | 30 | 1010 |
| 1978 | 8 | 1  | 0  | 2 | AMELIA | 29.3 | 99.2 | 25 | 1010 |
| 1978 | 8 | 5  | 12 | 3 | BESS   | 25.3 | 90.4 | 20 | 1012 |
| 1978 | 8 | 5  | 18 | 3 | BESS   | 25.1 | 91.0 | 20 | 1012 |
| 1978 | 8 | 6  | 0  | 3 | BESS   | 24.8 | 91.8 | 25 | 1011 |
| 1978 | 8 | 6  | 6  | 3 | BESS   | 24.5 | 92.5 | 30 | 1010 |
| 1978 | 8 | 6  | 12 | 3 | BESS   | 24.2 | 93.3 | 30 | 1009 |
| 1978 | 8 | 6  | 18 | 3 | BESS   | 23.9 | 94.0 | 35 | 1008 |
| 1978 | 8 | 7  | 0  | 3 | BESS   | 23.3 | 95.0 | 40 | 1007 |
| 1978 | 8 | 7  | 6  | 3 | BESS   | 22.8 | 95.7 | 40 | 1006 |
| 1978 | 8 | 7  | 12 | 3 | BESS   | 22.2 | 96.2 | 40 | 1005 |
| 1978 | 8 | 7  | 18 | 3 | BESS   | 21.6 | 96.6 | 45 | 1006 |
| 1978 | 8 | 8  | 0  | 3 | BESS   | 21.1 | 96.8 | 45 | 1007 |
| 1978 | 8 | 8  | 6  | 3 | BESS   | 20.4 | 96.9 | 40 | 1008 |
| 1978 | 8 | 8  | 12 | 3 | BESS   | 20.0 | 97.0 | 25 | 1010 |
| 1978 | 8 | 7  | 12 | 4 | CORA   | 13.0 | 35.0 | 25 | 1010 |
| 1978 | 8 | 7  | 18 | 4 | CORA   | 13.4 | 36.2 | 25 | 1010 |
| 1978 | 8 | 8  | 0  | 4 | CORA   | 13.8 | 37.8 | 25 | 1009 |
| 1978 | 8 | 8  | 6  | 4 | CORA   | 13.9 | 39.6 | 30 | 1008 |
| 1978 | 8 | 8  | 12 | 4 | CORA   | 14.0 | 41.5 | 50 | 1003 |
| 1978 | 8 | 8  | 18 | 4 | CORA   | 14.0 | 43.2 | 65 | 990  |
| 1978 | 8 | 9  | 0  | 4 | CORA   | 14.0 | 44.9 | 80 | 980  |
| 1978 | 8 | 9  | 6  | 4 | CORA   | 13.9 | 46.8 | 80 | 980  |
| 1978 | 8 | 9  | 12 | 4 | CORA   | 13.6 | 48.6 | 70 | 988  |
| 1978 | 8 | 9  | 18 | 4 | CORA   | 13.2 | 50.6 | 65 | 998  |
| 1978 | 8 | 10 | 0  | 4 | CORA   | 12.8 | 52.8 | 60 | 1006 |
| 1978 | 8 | 10 | 6  | 4 | CORA   | 12.4 | 54.8 | 55 | 1007 |
| 1978 | 8 | 10 | 12 | 4 | CORA   | 12.2 | 56.8 | 55 | 1007 |
| 1978 | 8 | 10 | 18 | 4 | CORA   | 12.1 | 58.8 | 50 | 1008 |
| 1978 | 8 | 11 | 0  | 4 | CORA   | 12.0 | 60.9 | 45 | 1008 |
| 1978 | 8 | 11 | 6  | 4 | CORA   | 12.0 | 62.8 | 35 | 1008 |
| 1978 | 8 | 11 | 12 | 4 | CORA   | 12.1 | 64.8 | 30 | 1008 |
| 1978 | 8 | 11 | 18 | 4 | CORA   | 12.1 | 66.8 | 30 | 1009 |
| 1978 | 8 | 12 | 0  | 4 | CORA   | 12.2 | 68.8 | 30 | 1010 |
| 1978 | 8 | 26 | 12 | 5 | DEBRA  | 23.4 | 88.4 | 25 | 1010 |
| 1978 | 8 | 26 | 18 | 5 | DEBRA  | 24.2 | 89.5 | 25 | 0    |
| 1978 | 8 | 27 | 0  | 5 | DEBRA  | 24.4 | 90.4 | 25 | 0    |
| 1978 | 8 | 27 | 6  | 5 | DEBRA  | 24.5 | 91.4 | 25 | 1008 |
| 1978 | 8 | 27 | 12 | 5 | DEBRA  | 24.6 | 92.3 | 25 | 0    |
| 1978 | 8 | 27 | 18 | 5 | DEBRA  | 25.1 | 93.1 | 25 | 0    |
| 1978 | 8 | 28 | 0  | 5 | DEBRA  | 25.8 | 93.8 | 25 | 1006 |
| 1978 | 8 | 28 | 6  | 5 | DEBRA  | 26.8 | 94.3 | 25 | 0    |

|      |         |           |      |      |     |      |
|------|---------|-----------|------|------|-----|------|
| 1978 | 8 28 12 | 5 DEBRA   | 27.8 | 94.3 | 30  | 0    |
| 1978 | 8 28 18 | 5 DEBRA   | 28.7 | 94.1 | 40  | 1002 |
| 1978 | 8 29 0  | 5 DEBRA   | 29.6 | 93.6 | 50  | 1000 |
| 1978 | 8 29 6  | 5 DEBRA   | 30.7 | 93.3 | 30  | 0    |
| 1978 | 8 29 12 | 5 DEBRA   | 32.0 | 93.0 | 30  | 1002 |
| 1978 | 8 29 18 | 5 DEBRA   | 34.2 | 92.7 | 15  | 1005 |
| 1978 | 8 30 0  | 6 ELLA    | 26.2 | 59.7 | 20  | 1012 |
| 1978 | 8 30 6  | 6 ELLA    | 26.5 | 60.8 | 20  | 1011 |
| 1978 | 8 30 12 | 6 ELLA    | 27.0 | 62.0 | 30  | 1010 |
| 1978 | 8 30 18 | 6 ELLA    | 27.3 | 63.1 | 40  | 1005 |
| 1978 | 8 31 0  | 6 ELLA    | 27.6 | 64.2 | 50  | 1000 |
| 1978 | 8 31 6  | 6 ELLA    | 28.2 | 65.9 | 55  | 993  |
| 1978 | 8 31 12 | 6 ELLA    | 28.8 | 67.6 | 60  | 986  |
| 1978 | 8 31 18 | 6 ELLA    | 29.3 | 68.8 | 70  | 980  |
| 1978 | 9 1 0   | 6 ELLA    | 29.6 | 70.0 | 90  | 978  |
| 1978 | 9 1 6   | 6 ELLA    | 30.1 | 71.1 | 100 | 975  |
| 1978 | 9 1 12  | 6 ELLA    | 30.7 | 71.8 | 110 | 970  |
| 1978 | 9 1 18  | 6 ELLA    | 31.1 | 72.3 | 110 | 960  |
| 1978 | 9 2 0   | 6 ELLA    | 31.2 | 72.7 | 105 | 960  |
| 1978 | 9 2 6   | 6 ELLA    | 31.4 | 73.1 | 100 | 977  |
| 1978 | 9 2 12  | 6 ELLA    | 31.6 | 73.3 | 80  | 981  |
| 1978 | 9 2 18  | 6 ELLA    | 31.9 | 73.0 | 70  | 983  |
| 1978 | 9 3 0   | 6 ELLA    | 32.3 | 72.8 | 70  | 983  |
| 1978 | 9 3 6   | 6 ELLA    | 33.0 | 72.4 | 80  | 981  |
| 1978 | 9 3 12  | 6 ELLA    | 33.8 | 71.7 | 85  | 976  |
| 1978 | 9 3 18  | 6 ELLA    | 35.0 | 70.2 | 95  | 970  |
| 1978 | 9 4 0   | 6 ELLA    | 36.2 | 68.3 | 110 | 962  |
| 1978 | 9 4 6   | 6 ELLA    | 38.0 | 66.0 | 115 | 958  |
| 1978 | 9 4 12  | 6 ELLA    | 40.0 | 63.0 | 120 | 956  |
| 1978 | 9 4 18  | 6 ELLA    | 42.5 | 59.5 | 115 | 956  |
| 1978 | 9 5 0   | 6 ELLA    | 45.0 | 55.0 | 105 | 960  |
| 1978 | 9 5 6   | 6 ELLA    | 47.2 | 50.2 | 80  | 975  |
| 1978 | 9 5 12  | 6 ELLA    | 49.0 | 45.0 | 65  | 980  |
| 1978 | 9 4 0   | 7 FLOSSIE | 12.0 | 39.0 | 25  | 1006 |
| 1978 | 9 4 6   | 7 FLOSSIE | 13.0 | 40.0 | 30  | 0    |
| 1978 | 9 4 12  | 7 FLOSSIE | 14.2 | 41.2 | 35  | 0    |
| 1978 | 9 4 18  | 7 FLOSSIE | 15.5 | 42.9 | 35  | 0    |
| 1978 | 9 5 0   | 7 FLOSSIE | 16.7 | 44.8 | 35  | 0    |
| 1978 | 9 5 6   | 7 FLOSSIE | 17.8 | 46.4 | 35  | 0    |
| 1978 | 9 5 12  | 7 FLOSSIE | 18.9 | 47.9 | 35  | 0    |
| 1978 | 9 5 18  | 7 FLOSSIE | 20.3 | 49.5 | 35  | 0    |
| 1978 | 9 6 0   | 7 FLOSSIE | 21.2 | 51.2 | 35  | 0    |
| 1978 | 9 6 6   | 7 FLOSSIE | 22.0 | 53.2 | 35  | 0    |
| 1978 | 9 6 12  | 7 FLOSSIE | 22.1 | 55.1 | 35  | 0    |

|      |   |    |    |           |      |      |    |      |
|------|---|----|----|-----------|------|------|----|------|
| 1978 | 9 | 6  | 18 | 7 FLOSSIE | 21.8 | 56.8 | 40 | 1003 |
| 1978 | 9 | 7  | 0  | 7 FLOSSIE | 21.7 | 58.0 | 40 | 0    |
| 1978 | 9 | 7  | 6  | 7 FLOSSIE | 21.8 | 59.0 | 40 | 0    |
| 1978 | 9 | 7  | 12 | 7 FLOSSIE | 22.2 | 60.0 | 40 | 1001 |
| 1978 | 9 | 7  | 18 | 7 FLOSSIE | 22.3 | 61.2 | 40 | 0    |
| 1978 | 9 | 8  | 0  | 7 FLOSSIE | 22.6 | 62.0 | 40 | 0    |
| 1978 | 9 | 8  | 6  | 7 FLOSSIE | 23.5 | 62.0 | 35 | 1005 |
| 1978 | 9 | 8  | 12 | 7 FLOSSIE | 24.3 | 61.1 | 35 | 0    |
| 1978 | 9 | 8  | 18 | 7 FLOSSIE | 25.0 | 60.5 | 30 | 1008 |
| 1978 | 9 | 9  | 0  | 7 FLOSSIE | 25.7 | 59.9 | 30 | 0    |
| 1978 | 9 | 9  | 6  | 7 FLOSSIE | 26.4 | 59.2 | 25 | 1010 |
| 1978 | 9 | 9  | 12 | 7 FLOSSIE | 27.2 | 58.3 | 25 | 0    |
| 1978 | 9 | 9  | 18 | 7 FLOSSIE | 27.7 | 57.3 | 25 | 0    |
| 1978 | 9 | 10 | 0  | 7 FLOSSIE | 28.2 | 56.1 | 25 | 0    |
| 1978 | 9 | 10 | 6  | 7 FLOSSIE | 28.6 | 54.8 | 30 | 1008 |
| 1978 | 9 | 10 | 12 | 7 FLOSSIE | 28.7 | 53.4 | 30 | 0    |
| 1978 | 9 | 10 | 18 | 7 FLOSSIE | 29.1 | 52.0 | 30 | 0    |
| 1978 | 9 | 11 | 0  | 7 FLOSSIE | 29.2 | 50.5 | 35 | 1005 |
| 1978 | 9 | 11 | 6  | 7 FLOSSIE | 29.9 | 49.1 | 45 | 1001 |
| 1978 | 9 | 11 | 12 | 7 FLOSSIE | 30.7 | 47.5 | 55 | 998  |
| 1978 | 9 | 11 | 18 | 7 FLOSSIE | 31.0 | 45.7 | 55 | 0    |
| 1978 | 9 | 12 | 0  | 7 FLOSSIE | 31.3 | 44.7 | 60 | 995  |
| 1978 | 9 | 12 | 6  | 7 FLOSSIE | 31.4 | 44.0 | 65 | 992  |
| 1978 | 9 | 12 | 12 | 7 FLOSSIE | 31.6 | 43.5 | 75 | 985  |
| 1978 | 9 | 12 | 18 | 7 FLOSSIE | 31.7 | 43.0 | 80 | 980  |
| 1978 | 9 | 13 | 0  | 7 FLOSSIE | 31.8 | 42.9 | 85 | 976  |
| 1978 | 9 | 13 | 6  | 7 FLOSSIE | 32.1 | 43.0 | 85 | 0    |
| 1978 | 9 | 13 | 12 | 7 FLOSSIE | 32.6 | 43.0 | 85 | 0    |
| 1978 | 9 | 13 | 18 | 7 FLOSSIE | 33.6 | 43.1 | 75 | 985  |
| 1978 | 9 | 14 | 0  | 7 FLOSSIE | 34.6 | 43.1 | 75 | 0    |
| 1978 | 9 | 14 | 6  | 7 FLOSSIE | 35.9 | 42.9 | 75 | 0    |
| 1978 | 9 | 14 | 12 | 7 FLOSSIE | 37.4 | 41.9 | 75 | 0    |
| 1978 | 9 | 14 | 18 | 7 FLOSSIE | 39.3 | 40.6 | 75 | 0    |
| 1978 | 9 | 15 | 0  | 7 FLOSSIE | 40.9 | 38.5 | 75 | 0    |
| 1978 | 9 | 15 | 6  | 7 FLOSSIE | 43.1 | 35.9 | 65 | 992  |
| 1978 | 9 | 15 | 12 | 7 FLOSSIE | 45.7 | 32.8 | 55 | 998  |
| 1978 | 9 | 15 | 18 | 7 FLOSSIE | 47.7 | 29.4 | 50 | 0    |
| 1978 | 9 | 16 | 0  | 7 FLOSSIE | 49.8 | 24.3 | 45 | 1000 |
| 1978 | 9 | 16 | 6  | 7 FLOSSIE | 51.5 | 19.0 | 45 | 0    |
| 1978 | 9 | 13 | 18 | 8 GRETA   | 11.0 | 62.5 | 25 | 0    |
| 1978 | 9 | 14 | 0  | 8 GRETA   | 11.5 | 64.5 | 25 | 0    |
| 1978 | 9 | 14 | 6  | 8 GRETA   | 12.0 | 66.0 | 30 | 0    |
| 1978 | 9 | 14 | 12 | 8 GRETA   | 12.5 | 67.5 | 35 | 0    |
| 1978 | 9 | 14 | 18 | 8 GRETA   | 13.0 | 69.0 | 35 | 1004 |

|      |      |    |         |      |      |     |      |
|------|------|----|---------|------|------|-----|------|
| 1978 | 9 15 | 0  | 8 GRETA | 13.3 | 70.4 | 40  | 0    |
| 1978 | 9 15 | 6  | 8 GRETA | 13.4 | 71.7 | 40  | 0    |
| 1978 | 9 15 | 12 | 8 GRETA | 13.5 | 73.1 | 45  | 0    |
| 1978 | 9 15 | 18 | 8 GRETA | 13.7 | 74.2 | 50  | 1000 |
| 1978 | 9 16 | 0  | 8 GRETA | 13.8 | 75.3 | 55  | 995  |
| 1978 | 9 16 | 6  | 8 GRETA | 13.8 | 76.7 | 60  | 0    |
| 1978 | 9 16 | 12 | 8 GRETA | 14.0 | 77.7 | 70  | 989  |
| 1978 | 9 16 | 18 | 8 GRETA | 14.3 | 78.7 | 75  | 0    |
| 1978 | 9 17 | 0  | 8 GRETA | 14.6 | 79.6 | 80  | 982  |
| 1978 | 9 17 | 6  | 8 GRETA | 14.9 | 80.5 | 85  | 0    |
| 1978 | 9 17 | 12 | 8 GRETA | 15.2 | 81.6 | 90  | 974  |
| 1978 | 9 17 | 18 | 8 GRETA | 15.5 | 82.6 | 95  | 968  |
| 1978 | 9 18 | 0  | 8 GRETA | 15.6 | 83.4 | 110 | 952  |
| 1978 | 9 18 | 6  | 8 GRETA | 15.8 | 84.3 | 115 | 947  |
| 1978 | 9 18 | 12 | 8 GRETA | 16.4 | 85.6 | 105 | 957  |
| 1978 | 9 18 | 18 | 8 GRETA | 16.6 | 86.9 | 100 | 964  |
| 1978 | 9 19 | 0  | 8 GRETA | 17.0 | 88.2 | 95  | 964  |
| 1978 | 9 19 | 6  | 8 GRETA | 17.0 | 89.4 | 50  | 0    |
| 1978 | 9 19 | 12 | 8 GRETA | 16.7 | 90.7 | 30  | 0    |
| 1978 | 9 19 | 18 | 8 GRETA | 16.0 | 92.0 | 30  | 0    |
| 1978 | 9 20 | 0  | 8 GRETA | 15.7 | 93.0 | 30  | 0    |
| 1978 | 9 12 | 0  | 9 HOPE  | 29.8 | 80.0 | 25  | 1012 |
| 1978 | 9 12 | 6  | 9 HOPE  | 30.3 | 79.3 | 25  | 0    |
| 1978 | 9 12 | 12 | 9 HOPE  | 30.9 | 78.6 | 25  | 1010 |
| 1978 | 9 12 | 18 | 9 HOPE  | 31.2 | 77.7 | 25  | 0    |
| 1978 | 9 13 | 0  | 9 HOPE  | 31.1 | 76.5 | 25  | 1010 |
| 1978 | 9 13 | 6  | 9 HOPE  | 31.2 | 75.2 | 25  | 0    |
| 1978 | 9 13 | 12 | 9 HOPE  | 31.8 | 74.2 | 25  | 1009 |
| 1978 | 9 13 | 18 | 9 HOPE  | 32.3 | 73.1 | 25  | 0    |
| 1978 | 9 14 | 0  | 9 HOPE  | 32.8 | 72.1 | 25  | 1008 |
| 1978 | 9 14 | 6  | 9 HOPE  | 33.0 | 70.8 | 25  | 0    |
| 1978 | 9 14 | 12 | 9 HOPE  | 33.2 | 68.7 | 30  | 1009 |
| 1978 | 9 14 | 18 | 9 HOPE  | 33.3 | 66.2 | 30  | 0    |
| 1978 | 9 15 | 0  | 9 HOPE  | 32.9 | 64.8 | 35  | 1008 |
| 1978 | 9 15 | 6  | 9 HOPE  | 32.0 | 62.8 | 35  | 0    |
| 1978 | 9 15 | 12 | 9 HOPE  | 31.6 | 62.1 | 35  | 1005 |
| 1978 | 9 15 | 18 | 9 HOPE  | 31.1 | 61.3 | 35  | 0    |
| 1978 | 9 16 | 0  | 9 HOPE  | 31.0 | 60.3 | 35  | 1002 |
| 1978 | 9 16 | 6  | 9 HOPE  | 31.0 | 59.2 | 35  | 0    |
| 1978 | 9 16 | 12 | 9 HOPE  | 31.2 | 58.1 | 35  | 0    |
| 1978 | 9 16 | 18 | 9 HOPE  | 31.7 | 57.2 | 35  | 0    |
| 1978 | 9 17 | 0  | 9 HOPE  | 32.4 | 56.0 | 35  | 0    |
| 1978 | 9 17 | 6  | 9 HOPE  | 33.0 | 54.8 | 40  | 1000 |
| 1978 | 9 17 | 12 | 9 HOPE  | 33.8 | 53.4 | 40  | 0    |



|      |    |    |    |    |        |      |      |    |      |
|------|----|----|----|----|--------|------|------|----|------|
| 1978 | 9  | 17 | 18 | 9  | HOPE   | 35.0 | 51.8 | 45 | 998  |
| 1978 | 9  | 18 | 0  | 9  | HOPE   | 36.0 | 49.9 | 50 | 0    |
| 1978 | 9  | 18 | 6  | 9  | HOPE   | 37.0 | 47.8 | 50 | 995  |
| 1978 | 9  | 18 | 12 | 9  | HOPE   | 38.0 | 45.2 | 50 | 0    |
| 1978 | 9  | 18 | 18 | 9  | HOPE   | 39.1 | 43.0 | 55 | 990  |
| 1978 | 9  | 19 | 0  | 9  | HOPE   | 40.1 | 40.5 | 55 | 0    |
| 1978 | 9  | 19 | 6  | 9  | HOPE   | 41.2 | 38.5 | 55 | 0    |
| 1978 | 9  | 19 | 12 | 9  | HOPE   | 42.5 | 36.5 | 55 | 987  |
| 1978 | 9  | 19 | 18 | 9  | HOPE   | 44.0 | 35.0 | 55 | 0    |
| 1978 | 9  | 20 | 0  | 9  | HOPE   | 45.5 | 33.0 | 55 | 990  |
| 1978 | 9  | 20 | 6  | 9  | HOPE   | 48.2 | 30.0 | 50 | 0    |
| 1978 | 9  | 20 | 12 | 9  | HOPE   | 51.5 | 29.5 | 50 | 0    |
| 1978 | 9  | 20 | 18 | 9  | HOPE   | 54.0 | 29.5 | 50 | 0    |
| 1978 | 9  | 21 | 0  | 9  | HOPE   | 57.0 | 30.0 | 50 | 995  |
| 1978 | 9  | 21 | 6  | 9  | HOPE   | 59.5 | 28.0 | 45 | 0    |
| 1978 | 9  | 21 | 12 | 9  | HOPE   | 61.0 | 23.0 | 45 | 0    |
| 1978 | 10 | 2  | 12 | 10 | IRMA   | 31.7 | 31.5 | 30 | 1010 |
| 1978 | 10 | 2  | 18 | 10 | IRMA   | 32.0 | 31.5 | 30 | 1006 |
| 1978 | 10 | 3  | 0  | 10 | IRMA   | 32.3 | 31.5 | 30 | 0    |
| 1978 | 10 | 3  | 6  | 10 | IRMA   | 32.6 | 31.5 | 30 | 0    |
| 1978 | 10 | 3  | 12 | 10 | IRMA   | 32.9 | 31.5 | 30 | 0    |
| 1978 | 10 | 3  | 18 | 10 | IRMA   | 33.4 | 31.5 | 30 | 0    |
| 1978 | 10 | 4  | 0  | 10 | IRMA   | 33.9 | 31.5 | 30 | 0    |
| 1978 | 10 | 4  | 6  | 10 | IRMA   | 34.5 | 31.5 | 30 | 0    |
| 1978 | 10 | 4  | 12 | 10 | IRMA   | 35.1 | 31.5 | 40 | 1004 |
| 1978 | 10 | 4  | 18 | 10 | IRMA   | 35.8 | 31.4 | 45 | 1002 |
| 1978 | 10 | 5  | 0  | 10 | IRMA   | 36.7 | 31.2 | 45 | 1001 |
| 1978 | 10 | 5  | 6  | 10 | IRMA   | 38.2 | 30.4 | 40 | 1002 |
| 1978 | 10 | 5  | 12 | 10 | IRMA   | 40.0 | 28.8 | 40 | 0    |
| 1978 | 10 | 5  | 18 | 10 | IRMA   | 43.0 | 26.2 | 40 | 0    |
| 1978 | 10 | 7  | 18 | 11 | JULIET | 18.0 | 55.6 | 25 | 1011 |
| 1978 | 10 | 8  | 0  | 11 | JULIET | 18.3 | 56.6 | 30 | 1010 |
| 1978 | 10 | 8  | 6  | 11 | JULIET | 18.6 | 57.7 | 30 | 1009 |
| 1978 | 10 | 8  | 12 | 11 | JULIET | 18.8 | 58.7 | 35 | 1008 |
| 1978 | 10 | 8  | 18 | 11 | JULIET | 19.0 | 59.8 | 40 | 1007 |
| 1978 | 10 | 9  | 0  | 11 | JULIET | 19.3 | 60.9 | 45 | 1006 |
| 1978 | 10 | 9  | 6  | 11 | JULIET | 19.7 | 62.0 | 45 | 1006 |
| 1978 | 10 | 9  | 12 | 11 | JULIET | 19.9 | 63.0 | 45 | 1006 |
| 1978 | 10 | 9  | 18 | 11 | JULIET | 20.3 | 64.2 | 45 | 1006 |
| 1978 | 10 | 10 | 0  | 11 | JULIET | 20.9 | 65.4 | 45 | 1006 |
| 1978 | 10 | 10 | 6  | 11 | JULIET | 21.7 | 67.0 | 45 | 1006 |
| 1978 | 10 | 10 | 12 | 11 | JULIET | 22.8 | 68.8 | 45 | 1006 |
| 1978 | 10 | 10 | 18 | 11 | JULIET | 24.3 | 70.1 | 45 | 1006 |
| 1978 | 10 | 11 | 0  | 11 | JULIET | 26.2 | 70.9 | 45 | 1006 |

|                         |      |      |    |      |
|-------------------------|------|------|----|------|
| 1978 10 11 6 11 JULIET  | 28.3 | 71.0 | 40 | 1006 |
| 1978 10 11 12 11 JULIET | 30.2 | 69.9 | 35 | 1006 |
| 1978 10 28 18 12 KENDRA | 23.5 | 72.7 | 30 | 1008 |
| 1978 10 29 0 12 KENDRA  | 24.2 | 73.2 | 40 | 1002 |
| 1978 10 29 6 12 KENDRA  | 24.9 | 73.6 | 40 | 0    |
| 1978 10 29 12 12 KENDRA | 25.7 | 73.7 | 55 | 998  |
| 1978 10 29 18 12 KENDRA | 26.2 | 74.1 | 65 | 995  |
| 1978 10 30 0 12 KENDRA  | 27.3 | 73.7 | 65 | 0    |
| 1978 10 30 6 12 KENDRA  | 28.1 | 73.5 | 65 | 0    |
| 1978 10 30 12 12 KENDRA | 28.9 | 72.6 | 70 | 990  |
| 1978 10 30 18 12 KENDRA | 29.3 | 72.3 | 65 | 998  |
| 1978 10 31 0 12 KENDRA  | 30.0 | 72.0 | 45 | 1006 |
| 1978 10 31 6 12 KENDRA  | 30.5 | 72.1 | 45 | 0    |
| 1978 10 31 12 12 KENDRA | 31.1 | 71.9 | 45 | 0    |
| 1978 10 31 18 12 KENDRA | 31.7 | 71.7 | 45 | 0    |
| 1978 11 1 0 12 KENDRA   | 32.6 | 70.5 | 45 | 0    |
| 1978 11 1 6 12 KENDRA   | 33.7 | 68.2 | 30 | 1008 |
| 1978 11 1 12 12 KENDRA  | 35.2 | 65.5 | 30 | 1006 |
| 1978 11 1 18 12 KENDRA  | 38.0 | 60.5 | 40 | 1002 |
| 1978 11 2 0 12 KENDRA   | 40.5 | 55.5 | 40 | 0    |
| 1978 11 2 6 12 KENDRA   | 41.0 | 50.0 | 40 | 0    |
| 1978 11 2 12 12 KENDRA  | 43.5 | 44.0 | 40 | 0    |
| 1978 11 2 18 12 KENDRA  | 44.5 | 39.5 | 40 | 0    |
| 1978 11 3 0 12 KENDRA   | 46.0 | 35.0 | 30 | 1004 |
| 1978 11 3 6 12 KENDRA   | 47.5 | 31.0 | 30 | 0    |
| 1978 11 3 12 12 KENDRA  | 50.0 | 27.0 | 30 | 0    |
| 1979 6 19 12 1 ANA      | 10.0 | 45.0 | 25 | 1011 |
| 1979 6 19 18 1 ANA      | 10.2 | 46.0 | 25 | 1011 |
| 1979 6 20 0 1 ANA       | 10.5 | 47.0 | 25 | 1010 |
| 1979 6 20 6 1 ANA       | 10.9 | 48.1 | 25 | 1010 |
| 1979 6 20 12 1 ANA      | 11.3 | 49.2 | 25 | 1010 |
| 1979 6 20 18 1 ANA      | 11.8 | 50.2 | 25 | 1009 |
| 1979 6 21 0 1 ANA       | 12.3 | 51.1 | 30 | 1009 |
| 1979 6 21 6 1 ANA       | 12.9 | 51.9 | 30 | 1008 |
| 1979 6 21 12 1 ANA      | 13.5 | 52.7 | 30 | 1008 |
| 1979 6 21 18 1 ANA      | 13.9 | 53.5 | 30 | 1007 |
| 1979 6 22 0 1 ANA       | 14.2 | 54.7 | 35 | 1007 |
| 1979 6 22 6 1 ANA       | 14.2 | 55.8 | 40 | 1005 |
| 1979 6 22 12 1 ANA      | 14.2 | 56.9 | 50 | 1006 |
| 1979 6 22 18 1 ANA      | 14.1 | 58.3 | 40 | 1008 |
| 1979 6 23 0 1 ANA       | 14.1 | 59.8 | 35 | 1010 |
| 1979 6 23 6 1 ANA       | 14.0 | 61.3 | 30 | 1012 |
| 1979 6 23 12 1 ANA      | 14.0 | 62.8 | 25 | 1012 |
| 1979 6 23 18 1 ANA      | 14.0 | 64.5 | 25 | 1012 |

|      |      |    |             |      |      |         |
|------|------|----|-------------|------|------|---------|
| 1979 | 6 24 | 0  | 1 ANA       | 14.0 | 66.2 | 25 1012 |
| 1979 | 7 9  | 12 | 2 BOB       | 22.0 | 96.0 | 20 1012 |
| 1979 | 7 9  | 18 | 2 BOB       | 22.5 | 95.3 | 25 1010 |
| 1979 | 7 10 | 0  | 2 BOB       | 23.0 | 94.6 | 30 1007 |
| 1979 | 7 10 | 6  | 2 BOB       | 23.5 | 93.8 | 35 1004 |
| 1979 | 7 10 | 12 | 2 BOB       | 24.0 | 93.0 | 50 998  |
| 1979 | 7 10 | 18 | 2 BOB       | 25.0 | 92.3 | 55 996  |
| 1979 | 7 11 | 0  | 2 BOB       | 26.2 | 91.6 | 65 988  |
| 1979 | 7 11 | 6  | 2 BOB       | 27.8 | 91.1 | 65 991  |
| 1979 | 7 11 | 12 | 2 BOB       | 29.1 | 90.6 | 65 986  |
| 1979 | 7 11 | 18 | 2 BOB       | 31.0 | 90.2 | 40 992  |
| 1979 | 7 12 | 0  | 2 BOB       | 32.5 | 89.9 | 30 998  |
| 1979 | 7 12 | 6  | 2 BOB       | 34.0 | 89.7 | 25 1002 |
| 1979 | 7 12 | 12 | 2 BOB       | 35.9 | 89.1 | 25 1004 |
| 1979 | 7 12 | 18 | 2 BOB       | 37.2 | 87.8 | 25 1006 |
| 1979 | 7 13 | 0  | 2 BOB       | 38.5 | 86.5 | 25 1006 |
| 1979 | 7 13 | 6  | 2 BOB       | 38.8 | 85.3 | 25 1006 |
| 1979 | 7 13 | 12 | 2 BOB       | 39.0 | 84.0 | 25 1007 |
| 1979 | 7 13 | 18 | 2 BOB       | 39.0 | 82.7 | 25 1008 |
| 1979 | 7 14 | 0  | 2 BOB       | 39.0 | 81.3 | 20 1009 |
| 1979 | 7 14 | 6  | 2 BOB       | 38.7 | 80.1 | 20 1009 |
| 1979 | 7 14 | 12 | 2 BOB       | 38.3 | 78.8 | 20 1010 |
| 1979 | 7 14 | 18 | 2 BOB       | 37.9 | 77.7 | 20 1010 |
| 1979 | 7 15 | 0  | 2 BOB       | 37.5 | 76.5 | 20 1011 |
| 1979 | 7 15 | 6  | 2 BOB       | 36.8 | 76.3 | 20 1011 |
| 1979 | 7 15 | 12 | 2 BOB       | 36.0 | 76.0 | 20 1012 |
| 1979 | 7 15 | 18 | 2 BOB       | 35.0 | 76.3 | 20 1012 |
| 1979 | 7 16 | 0  | 2 BOB       | 34.0 | 76.5 | 20 1013 |
| 1979 | 7 16 | 6  | 2 BOB       | 33.5 | 75.8 | 20 1013 |
| 1979 | 7 16 | 12 | 2 BOB       | 33.0 | 75.0 | 20 1014 |
| 1979 | 7 15 | 12 | 3 CLAUDETTE | 12.5 | 46.3 | 20 1014 |
| 1979 | 7 15 | 18 | 3 CLAUDETTE | 12.8 | 48.4 | 20 1014 |
| 1979 | 7 16 | 0  | 3 CLAUDETTE | 13.4 | 50.4 | 25 1012 |
| 1979 | 7 16 | 6  | 3 CLAUDETTE | 14.6 | 52.1 | 25 1012 |
| 1979 | 7 16 | 12 | 3 CLAUDETTE | 15.7 | 53.8 | 30 1011 |
| 1979 | 7 16 | 18 | 3 CLAUDETTE | 16.5 | 55.5 | 30 1011 |
| 1979 | 7 17 | 0  | 3 CLAUDETTE | 17.0 | 57.2 | 30 1011 |
| 1979 | 7 17 | 6  | 3 CLAUDETTE | 17.5 | 58.8 | 30 1011 |
| 1979 | 7 17 | 12 | 3 CLAUDETTE | 17.8 | 60.3 | 35 1011 |
| 1979 | 7 17 | 18 | 3 CLAUDETTE | 18.0 | 62.1 | 40 1010 |
| 1979 | 7 18 | 0  | 3 CLAUDETTE | 18.2 | 63.8 | 35 1010 |
| 1979 | 7 18 | 6  | 3 CLAUDETTE | 18.3 | 65.4 | 30 1011 |
| 1979 | 7 18 | 12 | 3 CLAUDETTE | 18.4 | 67.0 | 30 1011 |
| 1979 | 7 18 | 18 | 3 CLAUDETTE | 18.5 | 68.5 | 25 1012 |

|      |      |    |   |           |      |      |         |
|------|------|----|---|-----------|------|------|---------|
| 1979 | 7 19 | 0  | 3 | CLAUDETTE | 18.7 | 69.5 | 20 1012 |
| 1979 | 7 19 | 6  | 3 | CLAUDETTE | 18.8 | 70.5 | 20 1012 |
| 1979 | 7 19 | 12 | 3 | CLAUDETTE | 18.8 | 71.4 | 20 1012 |
| 1979 | 7 19 | 18 | 3 | CLAUDETTE | 19.0 | 72.4 | 20 1012 |
| 1979 | 7 20 | 0  | 3 | CLAUDETTE | 19.0 | 73.3 | 20 1013 |
| 1979 | 7 20 | 6  | 3 | CLAUDETTE | 19.2 | 74.7 | 20 1013 |
| 1979 | 7 20 | 12 | 3 | CLAUDETTE | 19.5 | 76.7 | 20 1013 |
| 1979 | 7 20 | 18 | 3 | CLAUDETTE | 20.0 | 78.7 | 20 1013 |
| 1979 | 7 21 | 0  | 3 | CLAUDETTE | 20.6 | 80.4 | 20 1013 |
| 1979 | 7 21 | 6  | 3 | CLAUDETTE | 21.4 | 82.2 | 25 1013 |
| 1979 | 7 21 | 12 | 3 | CLAUDETTE | 22.1 | 83.5 | 30 1012 |
| 1979 | 7 21 | 18 | 3 | CLAUDETTE | 22.8 | 85.0 | 30 1010 |
| 1979 | 7 22 | 0  | 3 | CLAUDETTE | 23.5 | 86.5 | 30 1007 |
| 1979 | 7 22 | 6  | 3 | CLAUDETTE | 24.0 | 87.4 | 30 1007 |
| 1979 | 7 22 | 12 | 3 | CLAUDETTE | 24.5 | 88.5 | 30 1007 |
| 1979 | 7 22 | 18 | 3 | CLAUDETTE | 25.0 | 89.5 | 30 1006 |
| 1979 | 7 23 | 0  | 3 | CLAUDETTE | 25.4 | 90.5 | 30 1005 |
| 1979 | 7 23 | 6  | 3 | CLAUDETTE | 25.9 | 91.4 | 30 1004 |
| 1979 | 7 23 | 12 | 3 | CLAUDETTE | 26.4 | 92.4 | 35 1003 |
| 1979 | 7 23 | 18 | 3 | CLAUDETTE | 26.9 | 92.9 | 35 1003 |
| 1979 | 7 24 | 0  | 3 | CLAUDETTE | 27.5 | 93.4 | 35 1003 |
| 1979 | 7 24 | 6  | 3 | CLAUDETTE | 28.3 | 93.5 | 40 1003 |
| 1979 | 7 24 | 12 | 3 | CLAUDETTE | 28.8 | 93.7 | 45 1002 |
| 1979 | 7 24 | 18 | 3 | CLAUDETTE | 29.6 | 93.9 | 45 1000 |
| 1979 | 7 25 | 0  | 3 | CLAUDETTE | 30.3 | 93.9 | 40 997  |
| 1979 | 7 25 | 6  | 3 | CLAUDETTE | 30.3 | 94.3 | 35 998  |
| 1979 | 7 25 | 12 | 3 | CLAUDETTE | 30.5 | 94.8 | 30 1000 |
| 1979 | 7 25 | 18 | 3 | CLAUDETTE | 30.5 | 95.2 | 30 1001 |
| 1979 | 7 26 | 0  | 3 | CLAUDETTE | 30.2 | 95.3 | 30 1001 |
| 1979 | 7 26 | 6  | 3 | CLAUDETTE | 30.6 | 95.1 | 30 1002 |
| 1979 | 7 26 | 12 | 3 | CLAUDETTE | 30.8 | 95.4 | 25 1003 |
| 1979 | 7 26 | 18 | 3 | CLAUDETTE | 31.3 | 96.3 | 25 1004 |
| 1979 | 7 27 | 0  | 3 | CLAUDETTE | 31.8 | 96.6 | 20 1004 |
| 1979 | 7 27 | 6  | 3 | CLAUDETTE | 32.7 | 96.4 | 20 1006 |
| 1979 | 7 27 | 12 | 3 | CLAUDETTE | 34.0 | 95.9 | 15 1007 |
| 1979 | 7 27 | 18 | 3 | CLAUDETTE | 35.3 | 95.3 | 15 1007 |
| 1979 | 7 28 | 0  | 3 | CLAUDETTE | 36.4 | 94.6 | 15 1007 |
| 1979 | 7 28 | 6  | 3 | CLAUDETTE | 37.8 | 93.4 | 15 1008 |
| 1979 | 7 28 | 12 | 3 | CLAUDETTE | 38.6 | 91.0 | 15 1009 |
| 1979 | 7 28 | 18 | 3 | CLAUDETTE | 38.8 | 88.0 | 15 1009 |
| 1979 | 7 29 | 0  | 3 | CLAUDETTE | 39.0 | 85.2 | 15 1010 |
| 1979 | 7 29 | 6  | 3 | CLAUDETTE | 39.0 | 82.8 | 15 1011 |
| 1979 | 7 29 | 12 | 3 | CLAUDETTE | 39.0 | 80.2 | 15 1011 |
| 1979 | 8 25 | 12 | 4 | DAVID     | 11.7 | 36.1 | 25 1008 |

|      |         |         |      |      |     |      |
|------|---------|---------|------|------|-----|------|
| 1979 | 8 25 18 | 4 DAVID | 11.7 | 38.2 | 25  | 1007 |
| 1979 | 8 26 0  | 4 DAVID | 11.7 | 40.3 | 30  | 1006 |
| 1979 | 8 26 6  | 4 DAVID | 11.6 | 42.2 | 35  | 1005 |
| 1979 | 8 26 12 | 4 DAVID | 11.6 | 44.0 | 40  | 1003 |
| 1979 | 8 26 18 | 4 DAVID | 11.6 | 45.5 | 45  | 998  |
| 1979 | 8 27 0  | 4 DAVID | 11.7 | 47.0 | 55  | 990  |
| 1979 | 8 27 6  | 4 DAVID | 11.8 | 48.5 | 65  | 980  |
| 1979 | 8 27 12 | 4 DAVID | 11.8 | 50.0 | 80  | 966  |
| 1979 | 8 27 18 | 4 DAVID | 11.9 | 51.5 | 95  | 954  |
| 1979 | 8 28 0  | 4 DAVID | 12.2 | 52.9 | 115 | 947  |
| 1979 | 8 28 6  | 4 DAVID | 12.5 | 54.4 | 125 | 941  |
| 1979 | 8 28 12 | 4 DAVID | 12.8 | 55.7 | 130 | 938  |
| 1979 | 8 28 18 | 4 DAVID | 13.2 | 56.9 | 125 | 941  |
| 1979 | 8 29 0  | 4 DAVID | 13.7 | 58.0 | 120 | 944  |
| 1979 | 8 29 6  | 4 DAVID | 14.2 | 59.2 | 120 | 942  |
| 1979 | 8 29 12 | 4 DAVID | 14.8 | 60.3 | 125 | 938  |
| 1979 | 8 29 18 | 4 DAVID | 15.3 | 61.6 | 125 | 933  |
| 1979 | 8 30 0  | 4 DAVID | 15.6 | 62.8 | 130 | 929  |
| 1979 | 8 30 6  | 4 DAVID | 16.0 | 64.2 | 140 | 925  |
| 1979 | 8 30 12 | 4 DAVID | 16.3 | 65.2 | 145 | 924  |
| 1979 | 8 30 18 | 4 DAVID | 16.6 | 66.2 | 150 | 924  |
| 1979 | 8 31 0  | 4 DAVID | 16.8 | 67.3 | 145 | 927  |
| 1979 | 8 31 6  | 4 DAVID | 17.0 | 68.3 | 145 | 928  |
| 1979 | 8 31 12 | 4 DAVID | 17.2 | 69.1 | 145 | 927  |
| 1979 | 8 31 18 | 4 DAVID | 17.9 | 69.7 | 150 | 926  |
| 1979 | 9 1 0   | 4 DAVID | 18.8 | 70.4 | 130 | 953  |
| 1979 | 9 1 6   | 4 DAVID | 19.3 | 72.0 | 100 | 978  |
| 1979 | 9 1 12  | 4 DAVID | 19.7 | 73.7 | 65  | 1002 |
| 1979 | 9 1 18  | 4 DAVID | 20.6 | 74.6 | 60  | 1002 |
| 1979 | 9 2 0   | 4 DAVID | 21.3 | 75.2 | 65  | 997  |
| 1979 | 9 2 6   | 4 DAVID | 21.9 | 75.5 | 70  | 990  |
| 1979 | 9 2 12  | 4 DAVID | 23.0 | 76.3 | 70  | 984  |
| 1979 | 9 2 18  | 4 DAVID | 23.9 | 77.4 | 75  | 979  |
| 1979 | 9 3 0   | 4 DAVID | 24.6 | 78.2 | 80  | 976  |
| 1979 | 9 3 6   | 4 DAVID | 25.3 | 79.1 | 80  | 974  |
| 1979 | 9 3 12  | 4 DAVID | 26.3 | 79.6 | 85  | 973  |
| 1979 | 9 3 18  | 4 DAVID | 27.2 | 80.2 | 85  | 972  |
| 1979 | 9 4 0   | 4 DAVID | 28.0 | 80.5 | 85  | 971  |
| 1979 | 9 4 6   | 4 DAVID | 29.1 | 80.8 | 85  | 970  |
| 1979 | 9 4 12  | 4 DAVID | 30.2 | 80.9 | 85  | 970  |
| 1979 | 9 4 18  | 4 DAVID | 31.5 | 81.2 | 80  | 970  |
| 1979 | 9 5 0   | 4 DAVID | 32.5 | 81.1 | 65  | 972  |
| 1979 | 9 5 6   | 4 DAVID | 33.5 | 80.9 | 55  | 976  |
| 1979 | 9 5 12  | 4 DAVID | 34.9 | 80.6 | 45  | 980  |

|      |   |    |    |   |          |      |      |    |      |
|------|---|----|----|---|----------|------|------|----|------|
| 1979 | 9 | 5  | 18 | 4 | DAVID    | 36.2 | 80.1 | 40 | 984  |
| 1979 | 9 | 6  | 0  | 4 | DAVID    | 37.6 | 79.5 | 40 | 987  |
| 1979 | 9 | 6  | 6  | 4 | DAVID    | 39.2 | 78.5 | 40 | 989  |
| 1979 | 9 | 6  | 12 | 4 | DAVID    | 41.5 | 76.3 | 40 | 991  |
| 1979 | 9 | 6  | 18 | 4 | DAVID    | 43.3 | 73.7 | 40 | 992  |
| 1979 | 9 | 7  | 0  | 4 | DAVID    | 45.0 | 70.0 | 45 | 991  |
| 1979 | 9 | 7  | 6  | 4 | DAVID    | 46.5 | 66.0 | 50 | 988  |
| 1979 | 9 | 7  | 12 | 4 | DAVID    | 47.5 | 61.5 | 50 | 987  |
| 1979 | 9 | 7  | 18 | 4 | DAVID    | 50.0 | 57.0 | 55 | 986  |
| 1979 | 9 | 8  | 0  | 4 | DAVID    | 52.5 | 52.5 | 60 | 985  |
| 1979 | 8 | 30 | 0  | 5 | ELENA    | 25.5 | 89.1 | 25 | 1008 |
| 1979 | 8 | 30 | 6  | 5 | ELENA    | 26.0 | 89.9 | 25 | 1008 |
| 1979 | 8 | 30 | 12 | 5 | ELENA    | 26.4 | 90.7 | 30 | 1007 |
| 1979 | 8 | 30 | 18 | 5 | ELENA    | 26.8 | 91.8 | 35 | 1006 |
| 1979 | 8 | 31 | 0  | 5 | ELENA    | 26.5 | 93.0 | 35 | 1004 |
| 1979 | 8 | 31 | 6  | 5 | ELENA    | 26.8 | 93.8 | 35 | 1006 |
| 1979 | 8 | 31 | 12 | 5 | ELENA    | 27.0 | 94.2 | 35 | 1008 |
| 1979 | 8 | 31 | 18 | 5 | ELENA    | 27.3 | 94.7 | 35 | 1008 |
| 1979 | 9 | 1  | 0  | 5 | ELENA    | 27.6 | 95.1 | 35 | 1008 |
| 1979 | 9 | 1  | 6  | 5 | ELENA    | 27.9 | 95.5 | 35 | 1008 |
| 1979 | 9 | 1  | 12 | 5 | ELENA    | 28.5 | 95.8 | 35 | 1008 |
| 1979 | 9 | 1  | 18 | 5 | ELENA    | 29.0 | 95.8 | 30 | 1008 |
| 1979 | 9 | 2  | 0  | 5 | ELENA    | 29.6 | 95.8 | 25 | 1008 |
| 1979 | 8 | 29 | 6  | 6 | FREDERIC | 11.0 | 25.5 | 25 | 1009 |
| 1979 | 8 | 29 | 12 | 6 | FREDERIC | 11.1 | 28.0 | 30 | 1009 |
| 1979 | 8 | 29 | 18 | 6 | FREDERIC | 11.2 | 30.5 | 30 | 1008 |
| 1979 | 8 | 30 | 0  | 6 | FREDERIC | 11.3 | 32.5 | 30 | 1007 |
| 1979 | 8 | 30 | 6  | 6 | FREDERIC | 11.4 | 34.2 | 30 | 1006 |
| 1979 | 8 | 30 | 12 | 6 | FREDERIC | 11.5 | 36.0 | 35 | 1005 |
| 1979 | 8 | 30 | 18 | 6 | FREDERIC | 11.6 | 37.8 | 40 | 1003 |
| 1979 | 8 | 31 | 0  | 6 | FREDERIC | 11.7 | 39.7 | 45 | 1000 |
| 1979 | 8 | 31 | 6  | 6 | FREDERIC | 11.8 | 41.6 | 50 | 997  |
| 1979 | 8 | 31 | 12 | 6 | FREDERIC | 11.9 | 43.5 | 55 | 994  |
| 1979 | 8 | 31 | 18 | 6 | FREDERIC | 12.0 | 45.1 | 55 | 991  |
| 1979 | 9 | 1  | 0  | 6 | FREDERIC | 12.5 | 47.0 | 60 | 988  |
| 1979 | 9 | 1  | 6  | 6 | FREDERIC | 12.9 | 48.7 | 65 | 987  |
| 1979 | 9 | 1  | 12 | 6 | FREDERIC | 13.3 | 50.4 | 65 | 988  |
| 1979 | 9 | 1  | 18 | 6 | FREDERIC | 13.8 | 52.3 | 65 | 990  |
| 1979 | 9 | 2  | 0  | 6 | FREDERIC | 14.3 | 54.1 | 60 | 992  |
| 1979 | 9 | 2  | 6  | 6 | FREDERIC | 14.9 | 55.5 | 60 | 994  |
| 1979 | 9 | 2  | 12 | 6 | FREDERIC | 15.5 | 57.2 | 60 | 996  |
| 1979 | 9 | 2  | 18 | 6 | FREDERIC | 16.3 | 58.8 | 55 | 999  |
| 1979 | 9 | 3  | 0  | 6 | FREDERIC | 16.7 | 59.8 | 55 | 1002 |
| 1979 | 9 | 3  | 6  | 6 | FREDERIC | 17.1 | 60.8 | 55 | 1000 |

|      |   |    |    |   |          |      |      |     |      |
|------|---|----|----|---|----------|------|------|-----|------|
| 1979 | 9 | 3  | 12 | 6 | FREDERIC | 17.5 | 61.8 | 50  | 999  |
| 1979 | 9 | 3  | 18 | 6 | FREDERIC | 17.8 | 62.8 | 50  | 1000 |
| 1979 | 9 | 4  | 0  | 6 | FREDERIC | 18.0 | 63.8 | 50  | 1002 |
| 1979 | 9 | 4  | 6  | 6 | FREDERIC | 18.1 | 64.8 | 45  | 1003 |
| 1979 | 9 | 4  | 12 | 6 | FREDERIC | 18.1 | 65.8 | 45  | 1004 |
| 1979 | 9 | 4  | 18 | 6 | FREDERIC | 18.1 | 66.8 | 45  | 1005 |
| 1979 | 9 | 5  | 0  | 6 | FREDERIC | 18.0 | 67.8 | 45  | 1006 |
| 1979 | 9 | 5  | 6  | 6 | FREDERIC | 17.5 | 68.7 | 45  | 1007 |
| 1979 | 9 | 5  | 12 | 6 | FREDERIC | 17.4 | 69.2 | 40  | 1008 |
| 1979 | 9 | 5  | 18 | 6 | FREDERIC | 17.8 | 69.6 | 40  | 1007 |
| 1979 | 9 | 6  | 0  | 6 | FREDERIC | 18.5 | 69.9 | 40  | 1005 |
| 1979 | 9 | 6  | 6  | 6 | FREDERIC | 19.4 | 70.7 | 35  | 1005 |
| 1979 | 9 | 6  | 12 | 6 | FREDERIC | 19.9 | 71.8 | 35  | 1006 |
| 1979 | 9 | 6  | 18 | 6 | FREDERIC | 20.0 | 73.0 | 30  | 1006 |
| 1979 | 9 | 7  | 0  | 6 | FREDERIC | 20.1 | 74.5 | 30  | 1006 |
| 1979 | 9 | 7  | 6  | 6 | FREDERIC | 20.3 | 75.8 | 25  | 1006 |
| 1979 | 9 | 7  | 12 | 6 | FREDERIC | 20.6 | 77.0 | 25  | 1005 |
| 1979 | 9 | 7  | 18 | 6 | FREDERIC | 20.9 | 78.0 | 25  | 1004 |
| 1979 | 9 | 8  | 0  | 6 | FREDERIC | 21.1 | 78.7 | 30  | 1003 |
| 1979 | 9 | 8  | 6  | 6 | FREDERIC | 21.3 | 79.3 | 30  | 1003 |
| 1979 | 9 | 8  | 12 | 6 | FREDERIC | 21.5 | 79.8 | 30  | 1002 |
| 1979 | 9 | 8  | 18 | 6 | FREDERIC | 21.6 | 80.5 | 30  | 1002 |
| 1979 | 9 | 9  | 0  | 6 | FREDERIC | 21.7 | 81.0 | 35  | 1001 |
| 1979 | 9 | 9  | 6  | 6 | FREDERIC | 21.8 | 81.5 | 40  | 1000 |
| 1979 | 9 | 9  | 12 | 6 | FREDERIC | 21.9 | 82.0 | 45  | 999  |
| 1979 | 9 | 9  | 18 | 6 | FREDERIC | 22.0 | 82.5 | 50  | 997  |
| 1979 | 9 | 10 | 0  | 6 | FREDERIC | 22.4 | 83.0 | 55  | 995  |
| 1979 | 9 | 10 | 6  | 6 | FREDERIC | 22.7 | 83.3 | 60  | 992  |
| 1979 | 9 | 10 | 12 | 6 | FREDERIC | 22.8 | 83.6 | 65  | 990  |
| 1979 | 9 | 10 | 18 | 6 | FREDERIC | 23.0 | 83.8 | 70  | 987  |
| 1979 | 9 | 11 | 0  | 6 | FREDERIC | 23.3 | 84.0 | 75  | 985  |
| 1979 | 9 | 11 | 6  | 6 | FREDERIC | 23.8 | 84.4 | 80  | 983  |
| 1979 | 9 | 11 | 12 | 6 | FREDERIC | 24.4 | 84.8 | 85  | 980  |
| 1979 | 9 | 11 | 18 | 6 | FREDERIC | 25.0 | 85.2 | 95  | 968  |
| 1979 | 9 | 12 | 0  | 6 | FREDERIC | 25.7 | 85.8 | 100 | 960  |
| 1979 | 9 | 12 | 6  | 6 | FREDERIC | 26.5 | 86.4 | 110 | 952  |
| 1979 | 9 | 12 | 12 | 6 | FREDERIC | 27.4 | 87.0 | 115 | 943  |
| 1979 | 9 | 12 | 18 | 6 | FREDERIC | 28.4 | 87.7 | 115 | 950  |
| 1979 | 9 | 13 | 0  | 6 | FREDERIC | 29.7 | 88.0 | 115 | 946  |
| 1979 | 9 | 13 | 6  | 6 | FREDERIC | 30.8 | 88.5 | 95  | 955  |
| 1979 | 9 | 13 | 12 | 6 | FREDERIC | 32.2 | 88.7 | 65  | 975  |
| 1979 | 9 | 13 | 18 | 6 | FREDERIC | 34.0 | 88.0 | 45  | 985  |
| 1979 | 9 | 14 | 0  | 6 | FREDERIC | 35.2 | 87.0 | 40  | 990  |
| 1979 | 9 | 14 | 6  | 6 | FREDERIC | 37.0 | 84.5 | 35  | 996  |

|      |         |            |      |      |    |      |
|------|---------|------------|------|------|----|------|
| 1979 | 9 14 12 | 6 FREDERIC | 39.5 | 81.0 | 35 | 997  |
| 1979 | 9 14 18 | 6 FREDERIC | 42.5 | 76.0 | 30 | 998  |
| 1979 | 9 15 0  | 6 FREDERIC | 48.0 | 68.0 | 30 | 988  |
| 1979 | 9 4 12  | 7 GLORIA   | 15.5 | 21.0 | 25 | 1005 |
| 1979 | 9 4 18  | 7 GLORIA   | 16.5 | 22.5 | 25 | 1004 |
| 1979 | 9 5 0   | 7 GLORIA   | 17.5 | 24.0 | 25 | 1003 |
| 1979 | 9 5 6   | 7 GLORIA   | 18.5 | 25.5 | 25 | 1002 |
| 1979 | 9 5 12  | 7 GLORIA   | 19.0 | 27.0 | 30 | 1002 |
| 1979 | 9 5 18  | 7 GLORIA   | 19.8 | 28.8 | 30 | 1002 |
| 1979 | 9 6 0   | 7 GLORIA   | 20.5 | 30.3 | 30 | 1001 |
| 1979 | 9 6 6   | 7 GLORIA   | 21.2 | 32.0 | 30 | 1001 |
| 1979 | 9 6 12  | 7 GLORIA   | 22.0 | 33.8 | 35 | 1000 |
| 1979 | 9 6 18  | 7 GLORIA   | 22.5 | 35.5 | 45 | 998  |
| 1979 | 9 7 0   | 7 GLORIA   | 23.2 | 36.8 | 55 | 995  |
| 1979 | 9 7 6   | 7 GLORIA   | 24.4 | 37.2 | 65 | 992  |
| 1979 | 9 7 12  | 7 GLORIA   | 25.6 | 38.0 | 65 | 990  |
| 1979 | 9 7 18  | 7 GLORIA   | 26.4 | 38.7 | 70 | 988  |
| 1979 | 9 8 0   | 7 GLORIA   | 27.0 | 39.2 | 75 | 985  |
| 1979 | 9 8 6   | 7 GLORIA   | 27.5 | 40.0 | 75 | 985  |
| 1979 | 9 8 12  | 7 GLORIA   | 28.0 | 40.3 | 75 | 985  |
| 1979 | 9 8 18  | 7 GLORIA   | 28.6 | 41.0 | 75 | 985  |
| 1979 | 9 9 0   | 7 GLORIA   | 29.3 | 41.7 | 75 | 985  |
| 1979 | 9 9 6   | 7 GLORIA   | 29.9 | 42.5 | 75 | 985  |
| 1979 | 9 9 12  | 7 GLORIA   | 30.4 | 43.2 | 75 | 985  |
| 1979 | 9 9 18  | 7 GLORIA   | 31.0 | 44.0 | 70 | 987  |
| 1979 | 9 10 0  | 7 GLORIA   | 31.5 | 45.0 | 70 | 989  |
| 1979 | 9 10 6  | 7 GLORIA   | 31.2 | 45.8 | 65 | 991  |
| 1979 | 9 10 12 | 7 GLORIA   | 31.0 | 46.8 | 65 | 993  |
| 1979 | 9 10 18 | 7 GLORIA   | 31.1 | 47.0 | 60 | 994  |
| 1979 | 9 11 0  | 7 GLORIA   | 31.3 | 47.4 | 55 | 995  |
| 1979 | 9 11 6  | 7 GLORIA   | 31.4 | 47.9 | 55 | 995  |
| 1979 | 9 11 12 | 7 GLORIA   | 31.6 | 48.1 | 60 | 994  |
| 1979 | 9 11 18 | 7 GLORIA   | 31.8 | 48.4 | 65 | 992  |
| 1979 | 9 12 0  | 7 GLORIA   | 32.2 | 48.6 | 70 | 988  |
| 1979 | 9 12 6  | 7 GLORIA   | 32.4 | 48.6 | 75 | 985  |
| 1979 | 9 12 12 | 7 GLORIA   | 32.8 | 48.3 | 80 | 980  |
| 1979 | 9 12 18 | 7 GLORIA   | 33.2 | 47.8 | 85 | 975  |
| 1979 | 9 13 0  | 7 GLORIA   | 33.9 | 47.0 | 85 | 975  |
| 1979 | 9 13 6  | 7 GLORIA   | 34.5 | 46.0 | 85 | 976  |
| 1979 | 9 13 12 | 7 GLORIA   | 35.0 | 45.0 | 85 | 977  |
| 1979 | 9 13 18 | 7 GLORIA   | 36.0 | 43.8 | 80 | 978  |
| 1979 | 9 14 0  | 7 GLORIA   | 37.0 | 41.5 | 80 | 979  |
| 1979 | 9 14 6  | 7 GLORIA   | 38.5 | 39.5 | 75 | 980  |
| 1979 | 9 14 12 | 7 GLORIA   | 40.2 | 37.8 | 75 | 985  |



|      |          |             |      |      |    |      |
|------|----------|-------------|------|------|----|------|
| 1979 | 9 14 18  | 7 GLORIA    | 42.0 | 35.8 | 70 | 988  |
| 1979 | 9 15 0   | 7 GLORIA    | 43.4 | 34.0 | 65 | 992  |
| 1979 | 9 15 6   | 7 GLORIA    | 45.0 | 32.0 | 60 | 994  |
| 1979 | 9 15 0   | 8 HENRI     | 20.3 | 86.8 | 25 | 1003 |
| 1979 | 9 15 6   | 8 HENRI     | 21.5 | 86.9 | 25 | 1003 |
| 1979 | 9 15 12  | 8 HENRI     | 22.5 | 87.4 | 30 | 1003 |
| 1979 | 9 15 18  | 8 HENRI     | 22.5 | 88.5 | 30 | 1003 |
| 1979 | 9 16 0   | 8 HENRI     | 22.5 | 89.7 | 30 | 1003 |
| 1979 | 9 16 6   | 8 HENRI     | 22.5 | 91.0 | 30 | 1002 |
| 1979 | 9 16 12  | 8 HENRI     | 22.1 | 92.2 | 35 | 1001 |
| 1979 | 9 16 18  | 8 HENRI     | 21.3 | 93.1 | 45 | 999  |
| 1979 | 9 17 0   | 8 HENRI     | 20.2 | 93.6 | 55 | 995  |
| 1979 | 9 17 6   | 8 HENRI     | 20.2 | 94.0 | 65 | 990  |
| 1979 | 9 17 12  | 8 HENRI     | 20.4 | 94.3 | 75 | 983  |
| 1979 | 9 17 18  | 8 HENRI     | 20.8 | 94.6 | 70 | 984  |
| 1979 | 9 18 0   | 8 HENRI     | 20.9 | 95.0 | 65 | 992  |
| 1979 | 9 18 6   | 8 HENRI     | 21.0 | 95.4 | 60 | 997  |
| 1979 | 9 18 12  | 8 HENRI     | 21.2 | 95.7 | 50 | 1000 |
| 1979 | 9 18 18  | 8 HENRI     | 21.6 | 95.7 | 40 | 1000 |
| 1979 | 9 19 0   | 8 HENRI     | 21.5 | 95.7 | 40 | 1000 |
| 1979 | 9 19 6   | 8 HENRI     | 21.3 | 95.6 | 35 | 1001 |
| 1979 | 9 19 12  | 8 HENRI     | 21.1 | 95.5 | 35 | 1003 |
| 1979 | 9 19 18  | 8 HENRI     | 21.1 | 95.3 | 30 | 1005 |
| 1979 | 9 20 0   | 8 HENRI     | 21.1 | 94.9 | 30 | 1005 |
| 1979 | 9 20 6   | 8 HENRI     | 21.1 | 94.5 | 30 | 1005 |
| 1979 | 9 20 12  | 8 HENRI     | 21.2 | 94.2 | 30 | 1006 |
| 1979 | 9 20 18  | 8 HENRI     | 21.2 | 93.7 | 30 | 1006 |
| 1979 | 9 21 0   | 8 HENRI     | 21.4 | 93.4 | 30 | 1006 |
| 1979 | 9 21 6   | 8 HENRI     | 21.7 | 93.1 | 30 | 1007 |
| 1979 | 9 21 12  | 8 HENRI     | 22.0 | 92.7 | 30 | 1008 |
| 1979 | 9 21 18  | 8 HENRI     | 22.3 | 92.3 | 30 | 1009 |
| 1979 | 9 22 0   | 8 HENRI     | 22.6 | 92.1 | 25 | 1010 |
| 1979 | 9 22 6   | 8 HENRI     | 23.0 | 91.7 | 20 | 1011 |
| 1979 | 9 22 12  | 8 HENRI     | 23.3 | 91.5 | 20 | 1011 |
| 1979 | 9 22 18  | 8 HENRI     | 23.8 | 91.0 | 20 | 1011 |
| 1979 | 9 23 0   | 8 HENRI     | 24.3 | 90.5 | 20 | 1011 |
| 1979 | 9 23 6   | 8 HENRI     | 24.8 | 90.1 | 20 | 1011 |
| 1979 | 9 23 12  | 8 HENRI     | 25.3 | 89.6 | 20 | 1011 |
| 1979 | 9 23 18  | 8 HENRI     | 25.4 | 88.8 | 20 | 1011 |
| 1979 | 9 24 0   | 8 HENRI     | 25.6 | 88.0 | 20 | 1011 |
| 1979 | 9 24 6   | 8 HENRI     | 26.0 | 87.3 | 20 | 1011 |
| 1979 | 9 24 12  | 8 HENRI     | 26.4 | 86.7 | 20 | 1011 |
| 1979 | 10 23 12 | 9 SUBTROP 1 | 29.0 | 66.0 | 25 | 1007 |
| 1979 | 10 23 18 | 9 SUBTROP 1 | 31.0 | 65.3 | 25 | 1004 |

|      |    |    |    |   |           |      |      |     |      |
|------|----|----|----|---|-----------|------|------|-----|------|
| 1979 | 10 | 24 | 0  | 9 | SUBTROP 1 | 33.0 | 64.8 | 30  | 1000 |
| 1979 | 10 | 24 | 6  | 9 | SUBTROP 1 | 35.0 | 64.0 | 40  | 996  |
| 1979 | 10 | 24 | 12 | 9 | SUBTROP 1 | 37.5 | 63.0 | 50  | 990  |
| 1979 | 10 | 24 | 18 | 9 | SUBTROP 1 | 40.5 | 62.0 | 65  | 985  |
| 1979 | 10 | 25 | 0  | 9 | SUBTROP 1 | 43.5 | 61.0 | 60  | 980  |
| 1979 | 10 | 25 | 6  | 9 | SUBTROP 1 | 47.5 | 58.4 | 50  | 982  |
| 1979 | 10 | 25 | 12 | 9 | SUBTROP 1 | 51.0 | 55.0 | 45  | 987  |
| 1980 | 7  | 31 | 12 | 1 | ALLEN     | 11.0 | 30.0 | 25  | 0    |
| 1980 | 7  | 31 | 18 | 1 | ALLEN     | 10.9 | 32.2 | 25  | 0    |
| 1980 | 8  | 1  | 0  | 1 | ALLEN     | 10.8 | 34.3 | 30  | 1010 |
| 1980 | 8  | 1  | 6  | 1 | ALLEN     | 10.7 | 36.4 | 30  | 1009 |
| 1980 | 8  | 1  | 12 | 1 | ALLEN     | 10.7 | 38.6 | 30  | 1008 |
| 1980 | 8  | 1  | 18 | 1 | ALLEN     | 10.7 | 40.7 | 30  | 1006 |
| 1980 | 8  | 2  | 0  | 1 | ALLEN     | 11.0 | 42.8 | 35  | 1005 |
| 1980 | 8  | 2  | 6  | 1 | ALLEN     | 11.4 | 44.8 | 45  | 1000 |
| 1980 | 8  | 2  | 12 | 1 | ALLEN     | 11.9 | 46.9 | 55  | 995  |
| 1980 | 8  | 2  | 18 | 1 | ALLEN     | 12.3 | 49.1 | 60  | 990  |
| 1980 | 8  | 3  | 0  | 1 | ALLEN     | 12.4 | 51.4 | 65  | 985  |
| 1980 | 8  | 3  | 6  | 1 | ALLEN     | 12.6 | 53.6 | 70  | 980  |
| 1980 | 8  | 3  | 12 | 1 | ALLEN     | 12.8 | 55.6 | 80  | 975  |
| 1980 | 8  | 3  | 18 | 1 | ALLEN     | 12.9 | 57.5 | 95  | 965  |
| 1980 | 8  | 4  | 0  | 1 | ALLEN     | 13.3 | 59.1 | 110 | 950  |
| 1980 | 8  | 4  | 6  | 1 | ALLEN     | 13.6 | 61.0 | 115 | 948  |
| 1980 | 8  | 4  | 12 | 1 | ALLEN     | 14.0 | 63.0 | 125 | 945  |
| 1980 | 8  | 4  | 18 | 1 | ALLEN     | 14.4 | 64.9 | 130 | 930  |
| 1980 | 8  | 5  | 0  | 1 | ALLEN     | 14.8 | 66.7 | 140 | 911  |
| 1980 | 8  | 5  | 6  | 1 | ALLEN     | 15.4 | 68.6 | 145 | 916  |
| 1980 | 8  | 5  | 12 | 1 | ALLEN     | 15.9 | 70.5 | 155 | 932  |
| 1980 | 8  | 5  | 18 | 1 | ALLEN     | 16.5 | 72.3 | 150 | 940  |
| 1980 | 8  | 6  | 0  | 1 | ALLEN     | 17.8 | 73.8 | 140 | 945  |
| 1980 | 8  | 6  | 6  | 1 | ALLEN     | 18.3 | 75.9 | 115 | 955  |
| 1980 | 8  | 6  | 12 | 1 | ALLEN     | 19.2 | 78.0 | 115 | 955  |
| 1980 | 8  | 6  | 18 | 1 | ALLEN     | 20.0 | 80.1 | 125 | 955  |
| 1980 | 8  | 7  | 0  | 1 | ALLEN     | 20.1 | 81.9 | 135 | 945  |
| 1980 | 8  | 7  | 6  | 1 | ALLEN     | 20.4 | 83.6 | 145 | 935  |
| 1980 | 8  | 7  | 12 | 1 | ALLEN     | 21.0 | 84.8 | 155 | 910  |
| 1980 | 8  | 7  | 18 | 1 | ALLEN     | 21.8 | 86.4 | 165 | 899  |
| 1980 | 8  | 8  | 0  | 1 | ALLEN     | 22.2 | 87.9 | 155 | 920  |
| 1980 | 8  | 8  | 6  | 1 | ALLEN     | 22.8 | 89.2 | 130 | 945  |
| 1980 | 8  | 8  | 12 | 1 | ALLEN     | 23.4 | 90.5 | 115 | 960  |
| 1980 | 8  | 8  | 18 | 1 | ALLEN     | 23.9 | 91.8 | 130 | 940  |
| 1980 | 8  | 9  | 0  | 1 | ALLEN     | 24.5 | 93.0 | 145 | 912  |
| 1980 | 8  | 9  | 6  | 1 | ALLEN     | 25.0 | 94.2 | 155 | 909  |
| 1980 | 8  | 9  | 12 | 1 | ALLEN     | 25.2 | 95.4 | 140 | 916  |

|      |   |    |    |   |         |      |       |     |      |
|------|---|----|----|---|---------|------|-------|-----|------|
| 1980 | 8 | 9  | 18 | 1 | ALLEN   | 25.4 | 96.1  | 125 | 925  |
| 1980 | 8 | 10 | 0  | 1 | ALLEN   | 25.8 | 96.8  | 110 | 935  |
| 1980 | 8 | 10 | 6  | 1 | ALLEN   | 26.1 | 97.2  | 100 | 945  |
| 1980 | 8 | 10 | 12 | 1 | ALLEN   | 26.7 | 98.1  | 85  | 960  |
| 1980 | 8 | 10 | 18 | 1 | ALLEN   | 27.3 | 99.0  | 70  | 970  |
| 1980 | 8 | 11 | 0  | 1 | ALLEN   | 27.7 | 99.8  | 60  | 990  |
| 1980 | 8 | 11 | 6  | 1 | ALLEN   | 28.0 | 100.9 | 45  | 1000 |
| 1980 | 8 | 11 | 12 | 1 | ALLEN   | 28.5 | 101.9 | 30  | 1005 |
| 1980 | 8 | 11 | 18 | 1 | ALLEN   | 28.9 | 102.9 | 30  | 1008 |
| 1980 | 8 | 14 | 0  | 2 | BONNIE  | 12.7 | 35.5  | 25  | 1010 |
| 1980 | 8 | 14 | 6  | 2 | BONNIE  | 13.5 | 36.6  | 30  | 1008 |
| 1980 | 8 | 14 | 12 | 2 | BONNIE  | 14.7 | 37.3  | 35  | 1005 |
| 1980 | 8 | 14 | 18 | 2 | BONNIE  | 15.7 | 37.5  | 45  | 1000 |
| 1980 | 8 | 15 | 0  | 2 | BONNIE  | 16.7 | 37.8  | 45  | 1000 |
| 1980 | 8 | 15 | 6  | 2 | BONNIE  | 17.7 | 37.9  | 45  | 1000 |
| 1980 | 8 | 15 | 12 | 2 | BONNIE  | 18.8 | 38.1  | 45  | 1000 |
| 1980 | 8 | 15 | 18 | 2 | BONNIE  | 20.4 | 38.5  | 55  | 995  |
| 1980 | 8 | 16 | 0  | 2 | BONNIE  | 22.0 | 38.7  | 75  | 985  |
| 1980 | 8 | 16 | 6  | 2 | BONNIE  | 23.7 | 38.9  | 85  | 975  |
| 1980 | 8 | 16 | 12 | 2 | BONNIE  | 24.8 | 39.1  | 85  | 975  |
| 1980 | 8 | 16 | 18 | 2 | BONNIE  | 25.8 | 39.4  | 85  | 975  |
| 1980 | 8 | 17 | 0  | 2 | BONNIE  | 27.0 | 39.7  | 75  | 985  |
| 1980 | 8 | 17 | 6  | 2 | BONNIE  | 28.0 | 40.0  | 65  | 990  |
| 1980 | 8 | 17 | 12 | 2 | BONNIE  | 29.0 | 40.3  | 65  | 990  |
| 1980 | 8 | 17 | 18 | 2 | BONNIE  | 30.0 | 40.5  | 65  | 990  |
| 1980 | 8 | 18 | 0  | 2 | BONNIE  | 31.1 | 40.5  | 65  | 990  |
| 1980 | 8 | 18 | 6  | 2 | BONNIE  | 32.4 | 40.5  | 65  | 990  |
| 1980 | 8 | 18 | 12 | 2 | BONNIE  | 34.0 | 40.5  | 65  | 990  |
| 1980 | 8 | 18 | 18 | 2 | BONNIE  | 35.9 | 40.5  | 65  | 990  |
| 1980 | 8 | 19 | 0  | 2 | BONNIE  | 38.2 | 40.2  | 65  | 990  |
| 1980 | 8 | 19 | 6  | 2 | BONNIE  | 41.9 | 39.8  | 65  | 990  |
| 1980 | 8 | 19 | 12 | 2 | BONNIE  | 46.5 | 38.4  | 65  | 995  |
| 1980 | 8 | 19 | 18 | 2 | BONNIE  | 51.0 | 36.0  | 45  | 1000 |
| 1980 | 8 | 20 | 12 | 3 | CHARLEY | 36.0 | 73.0  | 25  | 1010 |
| 1980 | 8 | 20 | 18 | 3 | CHARLEY | 35.0 | 72.0  | 25  | 1008 |
| 1980 | 8 | 21 | 0  | 3 | CHARLEY | 34.0 | 71.0  | 30  | 1006 |
| 1980 | 8 | 21 | 6  | 3 | CHARLEY | 33.4 | 69.5  | 30  | 1005 |
| 1980 | 8 | 21 | 12 | 3 | CHARLEY | 34.0 | 68.0  | 35  | 1003 |
| 1980 | 8 | 21 | 18 | 3 | CHARLEY | 34.8 | 66.8  | 40  | 1002 |
| 1980 | 8 | 22 | 0  | 3 | CHARLEY | 35.8 | 65.7  | 45  | 1000 |
| 1980 | 8 | 22 | 6  | 3 | CHARLEY | 37.0 | 64.8  | 50  | 998  |
| 1980 | 8 | 22 | 12 | 3 | CHARLEY | 38.3 | 64.7  | 55  | 996  |
| 1980 | 8 | 22 | 18 | 3 | CHARLEY | 39.1 | 64.9  | 60  | 994  |
| 1980 | 8 | 23 | 0  | 3 | CHARLEY | 39.6 | 65.9  | 65  | 992  |

|      |      |    |   |          |      |       |    |      |
|------|------|----|---|----------|------|-------|----|------|
| 1980 | 8 23 | 6  | 3 | CHARLEY  | 38.9 | 66.7  | 70 | 990  |
| 1980 | 8 23 | 12 | 3 | CHARLEY  | 38.2 | 66.0  | 70 | 989  |
| 1980 | 8 23 | 18 | 3 | CHARLEY  | 38.0 | 64.7  | 70 | 990  |
| 1980 | 8 24 | 0  | 3 | CHARLEY  | 38.0 | 63.1  | 65 | 991  |
| 1980 | 8 24 | 6  | 3 | CHARLEY  | 37.9 | 61.7  | 60 | 994  |
| 1980 | 8 24 | 12 | 3 | CHARLEY  | 37.9 | 60.2  | 55 | 998  |
| 1980 | 8 24 | 18 | 3 | CHARLEY  | 37.9 | 58.2  | 45 | 1000 |
| 1980 | 8 25 | 0  | 3 | CHARLEY  | 38.0 | 55.0  | 35 | 1001 |
| 1980 | 8 25 | 6  | 3 | CHARLEY  | 38.1 | 51.3  | 35 | 1002 |
| 1980 | 8 25 | 12 | 3 | CHARLEY  | 38.2 | 47.0  | 35 | 1004 |
| 1980 | 8 25 | 18 | 3 | CHARLEY  | 38.5 | 42.2  | 35 | 1005 |
| 1980 | 9 4  | 18 | 4 | DANIELLE | 28.3 | 90.6  | 25 | 1010 |
| 1980 | 9 5  | 0  | 4 | DANIELLE | 28.3 | 91.3  | 25 | 1010 |
| 1980 | 9 5  | 6  | 4 | DANIELLE | 28.4 | 91.8  | 25 | 1009 |
| 1980 | 9 5  | 12 | 4 | DANIELLE | 28.8 | 92.4  | 30 | 1008 |
| 1980 | 9 5  | 18 | 4 | DANIELLE | 29.4 | 93.4  | 50 | 1004 |
| 1980 | 9 6  | 0  | 4 | DANIELLE | 29.4 | 94.9  | 40 | 1004 |
| 1980 | 9 6  | 6  | 4 | DANIELLE | 29.3 | 96.3  | 35 | 1008 |
| 1980 | 9 6  | 12 | 4 | DANIELLE | 29.1 | 97.0  | 30 | 1008 |
| 1980 | 9 6  | 18 | 4 | DANIELLE | 29.0 | 97.8  | 25 | 1008 |
| 1980 | 9 7  | 0  | 4 | DANIELLE | 29.0 | 98.3  | 20 | 1010 |
| 1980 | 9 7  | 6  | 4 | DANIELLE | 29.0 | 99.0  | 20 | 1010 |
| 1980 | 9 7  | 12 | 4 | DANIELLE | 29.0 | 100.0 | 20 | 1010 |
| 1980 | 9 4  | 12 | 5 | EARL     | 17.7 | 24.0  | 25 | 1008 |
| 1980 | 9 4  | 18 | 5 | EARL     | 17.4 | 25.3  | 30 | 1006 |
| 1980 | 9 5  | 0  | 5 | EARL     | 17.8 | 26.7  | 35 | 1003 |
| 1980 | 9 5  | 6  | 5 | EARL     | 18.2 | 28.0  | 40 | 1000 |
| 1980 | 9 5  | 12 | 5 | EARL     | 18.8 | 29.5  | 40 | 999  |
| 1980 | 9 5  | 18 | 5 | EARL     | 19.2 | 31.0  | 40 | 999  |
| 1980 | 9 6  | 0  | 5 | EARL     | 19.7 | 32.0  | 40 | 999  |
| 1980 | 9 6  | 6  | 5 | EARL     | 20.3 | 33.8  | 40 | 999  |
| 1980 | 9 6  | 12 | 5 | EARL     | 21.0 | 35.5  | 45 | 998  |
| 1980 | 9 6  | 18 | 5 | EARL     | 21.5 | 36.5  | 45 | 997  |
| 1980 | 9 7  | 0  | 5 | EARL     | 22.2 | 37.8  | 45 | 996  |
| 1980 | 9 7  | 6  | 5 | EARL     | 23.2 | 38.8  | 45 | 996  |
| 1980 | 9 7  | 12 | 5 | EARL     | 25.0 | 39.7  | 45 | 995  |
| 1980 | 9 7  | 18 | 5 | EARL     | 27.0 | 40.3  | 50 | 993  |
| 1980 | 9 8  | 0  | 5 | EARL     | 29.0 | 41.2  | 60 | 992  |
| 1980 | 9 8  | 6  | 5 | EARL     | 30.4 | 42.5  | 65 | 988  |
| 1980 | 9 8  | 12 | 5 | EARL     | 32.0 | 43.5  | 65 | 985  |
| 1980 | 9 8  | 18 | 5 | EARL     | 33.3 | 44.1  | 65 | 986  |
| 1980 | 9 9  | 0  | 5 | EARL     | 34.7 | 44.3  | 65 | 988  |
| 1980 | 9 9  | 6  | 5 | EARL     | 36.3 | 43.8  | 65 | 990  |
| 1980 | 9 9  | 12 | 5 | EARL     | 38.0 | 43.1  | 65 | 991  |

|      |   |    |    |   |         |      |      |     |      |
|------|---|----|----|---|---------|------|------|-----|------|
| 1980 | 9 | 9  | 18 | 5 | EARL    | 40.5 | 41.5 | 65  | 992  |
| 1980 | 9 | 10 | 0  | 5 | EARL    | 43.0 | 39.0 | 65  | 994  |
| 1980 | 9 | 10 | 6  | 5 | EARL    | 45.2 | 36.0 | 65  | 995  |
| 1980 | 9 | 10 | 12 | 5 | EARL    | 47.5 | 32.5 | 55  | 0    |
| 1980 | 9 | 10 | 18 | 5 | EARL    | 49.5 | 28.5 | 55  | 0    |
| 1980 | 9 | 11 | 0  | 5 | EARL    | 51.5 | 23.5 | 55  | 0    |
| 1980 | 9 | 6  | 0  | 6 | FRANCES | 12.5 | 19.0 | 25  | 1010 |
| 1980 | 9 | 6  | 6  | 6 | FRANCES | 12.5 | 20.0 | 25  | 1009 |
| 1980 | 9 | 6  | 12 | 6 | FRANCES | 12.6 | 21.0 | 30  | 1008 |
| 1980 | 9 | 6  | 18 | 6 | FRANCES | 12.7 | 21.8 | 35  | 1005 |
| 1980 | 9 | 7  | 0  | 6 | FRANCES | 12.8 | 22.5 | 40  | 1002 |
| 1980 | 9 | 7  | 6  | 6 | FRANCES | 12.9 | 23.2 | 45  | 998  |
| 1980 | 9 | 7  | 12 | 6 | FRANCES | 13.0 | 24.0 | 55  | 994  |
| 1980 | 9 | 7  | 18 | 6 | FRANCES | 13.0 | 24.8 | 60  | 990  |
| 1980 | 9 | 8  | 0  | 6 | FRANCES | 13.0 | 25.6 | 65  | 986  |
| 1980 | 9 | 8  | 6  | 6 | FRANCES | 13.0 | 26.8 | 70  | 978  |
| 1980 | 9 | 8  | 12 | 6 | FRANCES | 12.9 | 28.0 | 80  | 970  |
| 1980 | 9 | 8  | 18 | 6 | FRANCES | 12.8 | 29.0 | 90  | 965  |
| 1980 | 9 | 9  | 0  | 6 | FRANCES | 12.8 | 29.8 | 100 | 960  |
| 1980 | 9 | 9  | 6  | 6 | FRANCES | 12.9 | 30.5 | 100 | 958  |
| 1980 | 9 | 9  | 12 | 6 | FRANCES | 13.0 | 31.3 | 100 | 960  |
| 1980 | 9 | 9  | 18 | 6 | FRANCES | 13.2 | 32.1 | 90  | 965  |
| 1980 | 9 | 10 | 0  | 6 | FRANCES | 13.4 | 32.9 | 90  | 966  |
| 1980 | 9 | 10 | 6  | 6 | FRANCES | 13.8 | 33.5 | 90  | 967  |
| 1980 | 9 | 10 | 12 | 6 | FRANCES | 14.2 | 34.1 | 85  | 968  |
| 1980 | 9 | 10 | 18 | 6 | FRANCES | 14.9 | 34.6 | 80  | 970  |
| 1980 | 9 | 11 | 0  | 6 | FRANCES | 15.4 | 34.9 | 85  | 968  |
| 1980 | 9 | 11 | 6  | 6 | FRANCES | 16.0 | 35.0 | 90  | 965  |
| 1980 | 9 | 11 | 12 | 6 | FRANCES | 16.3 | 35.3 | 90  | 967  |
| 1980 | 9 | 11 | 18 | 6 | FRANCES | 16.6 | 35.9 | 85  | 968  |
| 1980 | 9 | 12 | 0  | 6 | FRANCES | 17.0 | 36.1 | 80  | 970  |
| 1980 | 9 | 12 | 6  | 6 | FRANCES | 17.2 | 36.9 | 80  | 970  |
| 1980 | 9 | 12 | 12 | 6 | FRANCES | 17.8 | 37.8 | 80  | 970  |
| 1980 | 9 | 12 | 18 | 6 | FRANCES | 18.3 | 38.5 | 80  | 970  |
| 1980 | 9 | 13 | 0  | 6 | FRANCES | 18.6 | 39.6 | 80  | 970  |
| 1980 | 9 | 13 | 6  | 6 | FRANCES | 18.8 | 40.6 | 85  | 968  |
| 1980 | 9 | 13 | 12 | 6 | FRANCES | 18.9 | 42.0 | 90  | 965  |
| 1980 | 9 | 13 | 18 | 6 | FRANCES | 19.3 | 43.4 | 90  | 965  |
| 1980 | 9 | 14 | 0  | 6 | FRANCES | 19.8 | 44.7 | 90  | 965  |
| 1980 | 9 | 14 | 6  | 6 | FRANCES | 20.2 | 45.9 | 90  | 965  |
| 1980 | 9 | 14 | 12 | 6 | FRANCES | 20.8 | 46.9 | 90  | 965  |
| 1980 | 9 | 14 | 18 | 6 | FRANCES | 21.6 | 48.0 | 90  | 965  |
| 1980 | 9 | 15 | 0  | 6 | FRANCES | 22.5 | 48.8 | 90  | 965  |
| 1980 | 9 | 15 | 6  | 6 | FRANCES | 23.3 | 49.6 | 90  | 965  |

|      |         |   |         |      |      |    |      |
|------|---------|---|---------|------|------|----|------|
| 1980 | 9 15 12 | 6 | FRANCES | 24.6 | 50.2 | 90 | 965  |
| 1980 | 9 15 18 | 6 | FRANCES | 25.8 | 50.8 | 90 | 965  |
| 1980 | 9 16 0  | 6 | FRANCES | 27.4 | 50.8 | 90 | 965  |
| 1980 | 9 16 6  | 6 | FRANCES | 28.8 | 50.6 | 90 | 965  |
| 1980 | 9 16 12 | 6 | FRANCES | 30.2 | 50.0 | 90 | 965  |
| 1980 | 9 16 18 | 6 | FRANCES | 31.8 | 49.2 | 90 | 965  |
| 1980 | 9 17 0  | 6 | FRANCES | 33.0 | 48.0 | 90 | 965  |
| 1980 | 9 17 6  | 6 | FRANCES | 33.9 | 47.2 | 85 | 968  |
| 1980 | 9 17 12 | 6 | FRANCES | 34.7 | 46.4 | 80 | 970  |
| 1980 | 9 17 18 | 6 | FRANCES | 35.7 | 45.9 | 80 | 970  |
| 1980 | 9 18 0  | 6 | FRANCES | 36.7 | 45.8 | 80 | 970  |
| 1980 | 9 18 6  | 6 | FRANCES | 37.8 | 45.8 | 80 | 970  |
| 1980 | 9 18 12 | 6 | FRANCES | 39.0 | 46.2 | 80 | 970  |
| 1980 | 9 18 18 | 6 | FRANCES | 40.0 | 46.5 | 80 | 972  |
| 1980 | 9 19 0  | 6 | FRANCES | 41.2 | 46.4 | 75 | 974  |
| 1980 | 9 19 6  | 6 | FRANCES | 42.4 | 45.8 | 70 | 978  |
| 1980 | 9 19 12 | 6 | FRANCES | 43.6 | 44.9 | 65 | 986  |
| 1980 | 9 19 18 | 6 | FRANCES | 44.5 | 43.2 | 65 | 986  |
| 1980 | 9 20 0  | 6 | FRANCES | 45.7 | 41.0 | 65 | 988  |
| 1980 | 9 20 6  | 6 | FRANCES | 47.0 | 39.0 | 60 | 990  |
| 1980 | 9 20 12 | 6 | FRANCES | 49.4 | 35.5 | 55 | 994  |
| 1980 | 9 20 18 | 6 | FRANCES | 51.2 | 32.0 | 50 | 998  |
| 1980 | 9 21 0  | 6 | FRANCES | 54.0 | 29.0 | 45 | 1000 |
| 1980 | 9 1 0   | 7 | GEORGES | 15.6 | 38.0 | 30 | 1010 |
| 1980 | 9 1 6   | 7 | GEORGES | 15.9 | 39.4 | 30 | 1010 |
| 1980 | 9 1 12  | 7 | GEORGES | 16.3 | 40.8 | 30 | 1010 |
| 1980 | 9 1 18  | 7 | GEORGES | 16.8 | 42.1 | 30 | 1010 |
| 1980 | 9 2 0   | 7 | GEORGES | 17.3 | 43.7 | 30 | 1010 |
| 1980 | 9 2 6   | 7 | GEORGES | 17.5 | 45.7 | 30 | 1010 |
| 1980 | 9 2 12  | 7 | GEORGES | 17.7 | 48.1 | 30 | 1010 |
| 1980 | 9 2 18  | 7 | GEORGES | 17.8 | 50.3 | 30 | 1010 |
| 1980 | 9 3 0   | 7 | GEORGES | 17.9 | 52.4 | 30 | 1010 |
| 1980 | 9 3 6   | 7 | GEORGES | 18.0 | 54.5 | 30 | 1010 |
| 1980 | 9 3 12  | 7 | GEORGES | 18.6 | 56.9 | 30 | 1010 |
| 1980 | 9 3 18  | 7 | GEORGES | 19.7 | 59.0 | 25 | 1011 |
| 1980 | 9 4 0   | 7 | GEORGES | 21.0 | 61.0 | 20 | 1012 |
| 1980 | 9 4 6   | 7 | GEORGES | 22.1 | 62.3 | 20 | 1012 |
| 1980 | 9 4 12  | 7 | GEORGES | 23.4 | 63.6 | 20 | 1013 |
| 1980 | 9 4 18  | 7 | GEORGES | 24.8 | 64.8 | 20 | 1013 |
| 1980 | 9 5 0   | 7 | GEORGES | 26.1 | 65.8 | 20 | 1014 |
| 1980 | 9 5 6   | 7 | GEORGES | 27.5 | 67.0 | 20 | 1014 |
| 1980 | 9 5 12  | 7 | GEORGES | 28.5 | 68.6 | 25 | 1014 |
| 1980 | 9 5 18  | 7 | GEORGES | 29.0 | 69.4 | 30 | 1013 |
| 1980 | 9 6 0   | 7 | GEORGES | 29.7 | 70.0 | 30 | 1013 |

|      |    |    |    |   |         |      |      |    |      |
|------|----|----|----|---|---------|------|------|----|------|
| 1980 | 9  | 6  | 6  | 7 | GEORGES | 30.6 | 70.0 | 30 | 1010 |
| 1980 | 9  | 6  | 12 | 7 | GEORGES | 31.7 | 69.6 | 30 | 1008 |
| 1980 | 9  | 6  | 18 | 7 | GEORGES | 32.9 | 69.1 | 30 | 1007 |
| 1980 | 9  | 7  | 0  | 7 | GEORGES | 34.4 | 67.9 | 40 | 1004 |
| 1980 | 9  | 7  | 6  | 7 | GEORGES | 35.9 | 65.9 | 45 | 1002 |
| 1980 | 9  | 7  | 12 | 7 | GEORGES | 37.3 | 63.7 | 50 | 1000 |
| 1980 | 9  | 7  | 18 | 7 | GEORGES | 38.6 | 61.5 | 55 | 997  |
| 1980 | 9  | 8  | 0  | 7 | GEORGES | 40.2 | 59.0 | 70 | 993  |
| 1980 | 9  | 8  | 6  | 7 | GEORGES | 42.9 | 55.1 | 70 | 993  |
| 1980 | 9  | 8  | 12 | 7 | GEORGES | 45.6 | 51.1 | 68 | 993  |
| 1980 | 9  | 8  | 18 | 7 | GEORGES | 48.0 | 46.9 | 65 | 993  |
| 1980 | 9  | 20 | 12 | 8 | HERMINE | 14.6 | 77.2 | 25 | 1008 |
| 1980 | 9  | 20 | 18 | 8 | HERMINE | 14.8 | 78.7 | 25 | 1007 |
| 1980 | 9  | 21 | 0  | 8 | HERMINE | 15.0 | 80.2 | 30 | 1006 |
| 1980 | 9  | 21 | 6  | 8 | HERMINE | 15.1 | 81.6 | 35 | 1003 |
| 1980 | 9  | 21 | 12 | 8 | HERMINE | 15.3 | 83.0 | 40 | 1000 |
| 1980 | 9  | 21 | 18 | 8 | HERMINE | 15.8 | 84.2 | 45 | 998  |
| 1980 | 9  | 22 | 0  | 8 | HERMINE | 16.5 | 85.5 | 50 | 996  |
| 1980 | 9  | 22 | 6  | 8 | HERMINE | 17.1 | 86.7 | 55 | 995  |
| 1980 | 9  | 22 | 12 | 8 | HERMINE | 17.8 | 87.8 | 60 | 994  |
| 1980 | 9  | 22 | 18 | 8 | HERMINE | 18.4 | 88.9 | 55 | 994  |
| 1980 | 9  | 23 | 0  | 8 | HERMINE | 18.8 | 90.2 | 50 | 995  |
| 1980 | 9  | 23 | 6  | 8 | HERMINE | 19.1 | 91.3 | 45 | 995  |
| 1980 | 9  | 23 | 12 | 8 | HERMINE | 19.3 | 92.6 | 50 | 995  |
| 1980 | 9  | 23 | 18 | 8 | HERMINE | 19.3 | 93.2 | 55 | 994  |
| 1980 | 9  | 24 | 0  | 8 | HERMINE | 19.2 | 93.8 | 60 | 993  |
| 1980 | 9  | 24 | 6  | 8 | HERMINE | 18.8 | 94.4 | 60 | 993  |
| 1980 | 9  | 24 | 12 | 8 | HERMINE | 18.5 | 94.8 | 55 | 994  |
| 1980 | 9  | 24 | 18 | 8 | HERMINE | 18.1 | 95.1 | 50 | 997  |
| 1980 | 9  | 25 | 0  | 8 | HERMINE | 17.7 | 95.5 | 45 | 1000 |
| 1980 | 9  | 25 | 6  | 8 | HERMINE | 17.3 | 95.8 | 40 | 1003 |
| 1980 | 9  | 25 | 12 | 8 | HERMINE | 17.0 | 96.0 | 35 | 1005 |
| 1980 | 9  | 25 | 18 | 8 | HERMINE | 17.0 | 96.0 | 30 | 1007 |
| 1980 | 9  | 26 | 0  | 8 | HERMINE | 17.0 | 96.0 | 25 | 1008 |
| 1980 | 10 | 1  | 0  | 9 | IVAN    | 33.6 | 20.0 | 25 | 1010 |
| 1980 | 10 | 1  | 6  | 9 | IVAN    | 33.7 | 20.7 | 25 | 1010 |
| 1980 | 10 | 1  | 12 | 9 | IVAN    | 33.8 | 21.5 | 25 | 1010 |
| 1980 | 10 | 1  | 18 | 9 | IVAN    | 34.1 | 22.2 | 25 | 1010 |
| 1980 | 10 | 2  | 0  | 9 | IVAN    | 34.5 | 22.8 | 25 | 1010 |
| 1980 | 10 | 2  | 6  | 9 | IVAN    | 35.0 | 23.3 | 25 | 1009 |
| 1980 | 10 | 2  | 12 | 9 | IVAN    | 35.7 | 23.7 | 25 | 1009 |
| 1980 | 10 | 2  | 18 | 9 | IVAN    | 36.5 | 23.8 | 25 | 1009 |
| 1980 | 10 | 3  | 0  | 9 | IVAN    | 37.2 | 23.5 | 25 | 1009 |
| 1980 | 10 | 3  | 6  | 9 | IVAN    | 37.8 | 23.1 | 25 | 1009 |

|         |         |        |      |      |         |
|---------|---------|--------|------|------|---------|
| 1980 10 | 3 12    | 9 IVAN | 38.7 | 22.5 | 25 1008 |
| 1980 10 | 3 18    | 9 IVAN | 38.5 | 21.4 | 25 1007 |
| 1980 10 | 4 0     | 9 IVAN | 37.7 | 21.8 | 25 1006 |
| 1980 10 | 4 6     | 9 IVAN | 37.0 | 22.7 | 25 1005 |
| 1980 10 | 4 12    | 9 IVAN | 36.5 | 23.5 | 30 1000 |
| 1980 10 | 4 18    | 9 IVAN | 35.6 | 24.6 | 40 998  |
| 1980 10 | 5 0     | 9 IVAN | 34.4 | 25.7 | 50 996  |
| 1980 10 | 5 6     | 9 IVAN | 33.4 | 26.8 | 55 995  |
| 1980 10 | 5 12    | 9 IVAN | 32.4 | 28.3 | 60 994  |
| 1980 10 | 5 18    | 9 IVAN | 31.3 | 29.6 | 60 993  |
| 1980 10 | 6 0     | 9 IVAN | 30.1 | 30.5 | 65 992  |
| 1980 10 | 6 6     | 9 IVAN | 29.1 | 31.1 | 75 985  |
| 1980 10 | 6 12    | 9 IVAN | 28.4 | 31.3 | 85 976  |
| 1980 10 | 6 18    | 9 IVAN | 28.1 | 31.1 | 90 970  |
| 1980 10 | 7 0     | 9 IVAN | 28.0 | 30.7 | 90 970  |
| 1980 10 | 7 6     | 9 IVAN | 28.5 | 30.6 | 90 970  |
| 1980 10 | 7 12    | 9 IVAN | 29.5 | 31.7 | 90 970  |
| 1980 10 | 7 18    | 9 IVAN | 29.8 | 32.7 | 90 970  |
| 1980 10 | 8 0     | 9 IVAN | 30.0 | 34.4 | 90 970  |
| 1980 10 | 8 6     | 9 IVAN | 30.6 | 36.2 | 90 970  |
| 1980 10 | 8 12    | 9 IVAN | 31.3 | 37.4 | 90 970  |
| 1980 10 | 8 18    | 9 IVAN | 31.5 | 39.0 | 90 970  |
| 1980 10 | 9 0     | 9 IVAN | 31.7 | 40.5 | 90 970  |
| 1980 10 | 9 6     | 9 IVAN | 32.3 | 41.0 | 90 971  |
| 1980 10 | 9 12    | 9 IVAN | 33.2 | 41.1 | 90 973  |
| 1980 10 | 9 18    | 9 IVAN | 33.8 | 41.2 | 90 975  |
| 1980 10 | 10 0    | 9 IVAN | 34.9 | 40.7 | 90 977  |
| 1980 10 | 10 6    | 9 IVAN | 36.2 | 40.0 | 90 978  |
| 1980 10 | 10 12   | 9 IVAN | 37.8 | 39.1 | 90 978  |
| 1980 10 | 10 18   | 9 IVAN | 39.7 | 37.9 | 80 980  |
| 1980 10 | 11 0    | 9 IVAN | 42.0 | 36.1 | 75 985  |
| 1980 10 | 11 6    | 9 IVAN | 44.4 | 34.1 | 70 988  |
| 1980 10 | 11 12   | 9 IVAN | 46.8 | 31.5 | 65 990  |
| 1980 10 | 11 18   | 9 IVAN | 49.7 | 27.5 | 65 990  |
| 1980 10 | 12 0    | 9 IVAN | 52.5 | 24.5 | 60 990  |
| 1980 11 | 7 18 10 | JEANNE | 13.6 | 82.6 | 20 1008 |
| 1980 11 | 8 0 10  | JEANNE | 14.7 | 83.0 | 20 1006 |
| 1980 11 | 8 6 10  | JEANNE | 16.0 | 83.4 | 20 1006 |
| 1980 11 | 8 12 10 | JEANNE | 17.3 | 83.9 | 25 1006 |
| 1980 11 | 8 18 10 | JEANNE | 18.6 | 84.3 | 30 1005 |
| 1980 11 | 9 0 10  | JEANNE | 19.3 | 84.6 | 30 1005 |
| 1980 11 | 9 6 10  | JEANNE | 20.0 | 84.8 | 30 1004 |
| 1980 11 | 9 12 10 | JEANNE | 20.8 | 85.1 | 40 1000 |
| 1980 11 | 9 18 10 | JEANNE | 21.3 | 85.2 | 45 999  |



|                  |        |      |      |    |      |
|------------------|--------|------|------|----|------|
| 1980 11 10 0 10  | JEANNE | 21.6 | 85.3 | 50 | 999  |
| 1980 11 10 6 10  | JEANNE | 22.0 | 85.4 | 50 | 999  |
| 1980 11 10 12 10 | JEANNE | 22.5 | 85.5 | 50 | 999  |
| 1980 11 10 18 10 | JEANNE | 23.2 | 85.7 | 50 | 999  |
| 1980 11 11 0 10  | JEANNE | 23.7 | 86.1 | 55 | 998  |
| 1980 11 11 6 10  | JEANNE | 24.1 | 86.5 | 60 | 997  |
| 1980 11 11 12 10 | JEANNE | 24.1 | 87.0 | 65 | 992  |
| 1980 11 11 18 10 | JEANNE | 24.1 | 87.2 | 75 | 986  |
| 1980 11 12 0 10  | JEANNE | 24.1 | 87.4 | 85 | 988  |
| 1980 11 12 6 10  | JEANNE | 23.9 | 88.3 | 70 | 992  |
| 1980 11 12 12 10 | JEANNE | 23.8 | 89.0 | 65 | 994  |
| 1980 11 12 18 10 | JEANNE | 23.8 | 89.8 | 65 | 995  |
| 1980 11 13 0 10  | JEANNE | 24.0 | 90.3 | 55 | 999  |
| 1980 11 13 6 10  | JEANNE | 24.9 | 91.6 | 55 | 997  |
| 1980 11 13 12 10 | JEANNE | 25.6 | 92.8 | 60 | 993  |
| 1980 11 13 18 10 | JEANNE | 25.6 | 94.0 | 60 | 994  |
| 1980 11 14 0 10  | JEANNE | 25.5 | 95.0 | 55 | 996  |
| 1980 11 14 6 10  | JEANNE | 25.6 | 95.2 | 50 | 998  |
| 1980 11 14 12 10 | JEANNE | 25.8 | 95.2 | 50 | 1002 |
| 1980 11 14 18 10 | JEANNE | 26.0 | 94.8 | 40 | 1002 |
| 1980 11 15 0 10  | JEANNE | 26.2 | 94.4 | 30 | 1004 |
| 1980 11 15 6 10  | JEANNE | 26.3 | 93.7 | 30 | 1004 |
| 1980 11 15 12 10 | JEANNE | 26.2 | 93.2 | 25 | 1005 |
| 1980 11 15 18 10 | JEANNE | 25.9 | 92.9 | 20 | 1006 |
| 1980 11 16 0 10  | JEANNE | 25.4 | 93.0 | 20 | 1007 |
| 1980 11 16 6 10  | JEANNE | 25.2 | 93.1 | 20 | 1007 |
| 1980 11 25 0 11  | KARL   | 36.0 | 46.0 | 50 | 988  |
| 1980 11 25 6 11  | KARL   | 36.8 | 44.8 | 50 | 988  |
| 1980 11 25 12 11 | KARL   | 37.2 | 44.5 | 55 | 988  |
| 1980 11 25 18 11 | KARL   | 37.7 | 44.7 | 65 | 988  |
| 1980 11 26 0 11  | KARL   | 37.4 | 44.8 | 70 | 988  |
| 1980 11 26 6 11  | KARL   | 37.0 | 44.2 | 75 | 985  |
| 1980 11 26 12 11 | KARL   | 36.8 | 42.5 | 75 | 985  |
| 1980 11 26 18 11 | KARL   | 37.1 | 40.5 | 75 | 985  |
| 1980 11 27 0 11  | KARL   | 37.8 | 38.3 | 70 | 988  |
| 1980 11 27 6 11  | KARL   | 38.9 | 36.5 | 65 | 990  |
| 1980 11 27 12 11 | KARL   | 40.4 | 34.9 | 65 | 990  |
| 1980 11 27 18 11 | KARL   | 42.3 | 33.1 | 65 | 990  |
| 1980 11 28 0 11  | KARL   | 45.0 | 32.0 | 65 | 990  |
| 1981 5 6 18 1    | ARLENE | 18.4 | 83.6 | 30 | 1006 |
| 1981 5 7 0 1     | ARLENE | 18.4 | 82.7 | 30 | 1006 |
| 1981 5 7 6 1     | ARLENE | 18.6 | 81.7 | 30 | 1005 |
| 1981 5 7 12 1    | ARLENE | 19.0 | 80.6 | 35 | 1003 |
| 1981 5 7 18 1    | ARLENE | 19.6 | 79.7 | 40 | 1000 |

|      |   |    |    |   |        |      |      |    |      |
|------|---|----|----|---|--------|------|------|----|------|
| 1981 | 5 | 8  | 0  | 1 | ARLENE | 20.3 | 78.7 | 45 | 999  |
| 1981 | 5 | 8  | 6  | 1 | ARLENE | 21.1 | 77.4 | 30 | 1003 |
| 1981 | 5 | 8  | 12 | 1 | ARLENE | 22.4 | 76.4 | 30 | 1006 |
| 1981 | 5 | 8  | 18 | 1 | ARLENE | 23.0 | 74.5 | 50 | 1004 |
| 1981 | 5 | 9  | 0  | 1 | ARLENE | 23.4 | 72.8 | 30 | 1006 |
| 1981 | 5 | 9  | 6  | 1 | ARLENE | 24.0 | 71.0 | 25 | 1010 |
| 1981 | 6 | 29 | 12 | 2 | BRET   | 36.0 | 65.0 | 35 | 1012 |
| 1981 | 6 | 29 | 18 | 2 | BRET   | 36.0 | 67.0 | 45 | 1007 |
| 1981 | 6 | 30 | 0  | 2 | BRET   | 36.0 | 69.0 | 55 | 1003 |
| 1981 | 6 | 30 | 6  | 2 | BRET   | 36.0 | 71.0 | 60 | 999  |
| 1981 | 6 | 30 | 12 | 2 | BRET   | 36.0 | 72.5 | 60 | 996  |
| 1981 | 6 | 30 | 18 | 2 | BRET   | 36.2 | 73.8 | 60 | 996  |
| 1981 | 7 | 1  | 0  | 2 | BRET   | 36.6 | 74.7 | 50 | 1000 |
| 1981 | 7 | 1  | 6  | 2 | BRET   | 37.4 | 76.0 | 30 | 1006 |
| 1981 | 7 | 1  | 12 | 2 | BRET   | 38.5 | 78.5 | 20 | 0    |
| 1981 | 8 | 2  | 18 | 3 | CINDY  | 36.1 | 67.8 | 30 | 1010 |
| 1981 | 8 | 3  | 0  | 3 | CINDY  | 36.7 | 67.1 | 30 | 1008 |
| 1981 | 8 | 3  | 6  | 3 | CINDY  | 37.4 | 66.2 | 30 | 1006 |
| 1981 | 8 | 3  | 12 | 3 | CINDY  | 38.3 | 65.7 | 30 | 1003 |
| 1981 | 8 | 3  | 18 | 3 | CINDY  | 38.7 | 64.9 | 40 | 1003 |
| 1981 | 8 | 4  | 0  | 3 | CINDY  | 39.0 | 63.8 | 50 | 1002 |
| 1981 | 8 | 4  | 6  | 3 | CINDY  | 39.4 | 62.2 | 50 | 1002 |
| 1981 | 8 | 4  | 12 | 3 | CINDY  | 40.4 | 60.7 | 50 | 1003 |
| 1981 | 8 | 4  | 18 | 3 | CINDY  | 41.3 | 58.4 | 50 | 1004 |
| 1981 | 8 | 5  | 0  | 3 | CINDY  | 42.2 | 55.7 | 45 | 1005 |
| 1981 | 8 | 5  | 6  | 3 | CINDY  | 43.3 | 52.7 | 40 | 1006 |
| 1981 | 8 | 5  | 12 | 3 | CINDY  | 44.1 | 50.4 | 30 | 1008 |
| 1981 | 8 | 7  | 6  | 4 | DENNIS | 10.5 | 25.7 | 30 | 1009 |
| 1981 | 8 | 7  | 12 | 4 | DENNIS | 10.8 | 28.1 | 30 | 1008 |
| 1981 | 8 | 7  | 18 | 4 | DENNIS | 11.0 | 29.6 | 30 | 1007 |
| 1981 | 8 | 8  | 0  | 4 | DENNIS | 11.3 | 31.3 | 35 | 1006 |
| 1981 | 8 | 8  | 6  | 4 | DENNIS | 11.7 | 33.1 | 35 | 1005 |
| 1981 | 8 | 8  | 12 | 4 | DENNIS | 12.0 | 35.0 | 35 | 1004 |
| 1981 | 8 | 8  | 18 | 4 | DENNIS | 12.5 | 36.7 | 40 | 1003 |
| 1981 | 8 | 9  | 0  | 4 | DENNIS | 12.8 | 38.7 | 40 | 1002 |
| 1981 | 8 | 9  | 6  | 4 | DENNIS | 13.1 | 40.8 | 40 | 1001 |
| 1981 | 8 | 9  | 12 | 4 | DENNIS | 13.3 | 43.0 | 40 | 1001 |
| 1981 | 8 | 9  | 18 | 4 | DENNIS | 13.5 | 45.0 | 40 | 1001 |
| 1981 | 8 | 10 | 0  | 4 | DENNIS | 13.5 | 47.0 | 40 | 1001 |
| 1981 | 8 | 10 | 6  | 4 | DENNIS | 13.5 | 49.0 | 40 | 1002 |
| 1981 | 8 | 10 | 12 | 4 | DENNIS | 13.5 | 51.0 | 40 | 1004 |
| 1981 | 8 | 10 | 18 | 4 | DENNIS | 13.6 | 52.9 | 35 | 1006 |
| 1981 | 8 | 11 | 0  | 4 | DENNIS | 13.8 | 54.9 | 30 | 1007 |
| 1981 | 8 | 11 | 6  | 4 | DENNIS | 14.0 | 56.5 | 30 | 1008 |

|      |         |          |      |      |         |
|------|---------|----------|------|------|---------|
| 1981 | 8 11 12 | 4 DENNIS | 14.3 | 58.3 | 30 1009 |
| 1981 | 8 11 18 | 4 DENNIS | 14.6 | 60.1 | 30 1010 |
| 1981 | 8 12 0  | 4 DENNIS | 14.9 | 61.9 | 25 1010 |
| 1981 | 8 12 6  | 4 DENNIS | 15.2 | 63.8 | 25 1011 |
| 1981 | 8 12 12 | 4 DENNIS | 15.4 | 65.7 | 25 1011 |
| 1981 | 8 12 18 | 4 DENNIS | 15.6 | 67.6 | 25 1011 |
| 1981 | 8 13 0  | 4 DENNIS | 15.8 | 69.5 | 15 0    |
| 1981 | 8 13 6  | 4 DENNIS | 15.9 | 71.2 | 15 0    |
| 1981 | 8 13 12 | 4 DENNIS | 16.1 | 72.8 | 15 0    |
| 1981 | 8 13 18 | 4 DENNIS | 16.4 | 74.4 | 15 0    |
| 1981 | 8 14 0  | 4 DENNIS | 16.8 | 75.7 | 15 0    |
| 1981 | 8 14 6  | 4 DENNIS | 17.4 | 77.0 | 15 0    |
| 1981 | 8 14 12 | 4 DENNIS | 18.0 | 78.0 | 15 0    |
| 1981 | 8 14 18 | 4 DENNIS | 18.8 | 78.8 | 15 0    |
| 1981 | 8 15 0  | 4 DENNIS | 19.5 | 79.5 | 15 0    |
| 1981 | 8 15 6  | 4 DENNIS | 20.3 | 80.0 | 15 0    |
| 1981 | 8 15 12 | 4 DENNIS | 21.0 | 80.5 | 15 0    |
| 1981 | 8 15 18 | 4 DENNIS | 21.7 | 80.8 | 30 1007 |
| 1981 | 8 16 0  | 4 DENNIS | 22.4 | 81.0 | 35 1005 |
| 1981 | 8 16 6  | 4 DENNIS | 23.0 | 81.2 | 35 1003 |
| 1981 | 8 16 12 | 4 DENNIS | 23.8 | 81.4 | 35 1001 |
| 1981 | 8 16 18 | 4 DENNIS | 24.5 | 81.3 | 35 1000 |
| 1981 | 8 17 0  | 4 DENNIS | 24.9 | 81.3 | 35 998  |
| 1981 | 8 17 6  | 4 DENNIS | 25.2 | 81.2 | 35 999  |
| 1981 | 8 17 12 | 4 DENNIS | 25.8 | 81.2 | 35 999  |
| 1981 | 8 17 18 | 4 DENNIS | 26.2 | 81.2 | 35 1001 |
| 1981 | 8 18 0  | 4 DENNIS | 26.5 | 81.2 | 35 1003 |
| 1981 | 8 18 6  | 4 DENNIS | 26.8 | 81.1 | 35 1004 |
| 1981 | 8 18 12 | 4 DENNIS | 27.2 | 81.0 | 35 1005 |
| 1981 | 8 18 18 | 4 DENNIS | 27.6 | 81.0 | 35 1005 |
| 1981 | 8 19 0  | 4 DENNIS | 28.7 | 80.8 | 35 1004 |
| 1981 | 8 19 6  | 4 DENNIS | 29.7 | 80.8 | 40 1003 |
| 1981 | 8 19 12 | 4 DENNIS | 31.0 | 80.8 | 40 1002 |
| 1981 | 8 19 18 | 4 DENNIS | 32.2 | 79.9 | 45 1001 |
| 1981 | 8 20 0  | 4 DENNIS | 33.4 | 78.8 | 50 999  |
| 1981 | 8 20 6  | 4 DENNIS | 34.7 | 77.0 | 55 998  |
| 1981 | 8 20 12 | 4 DENNIS | 35.5 | 75.2 | 60 997  |
| 1981 | 8 20 18 | 4 DENNIS | 36.3 | 73.0 | 65 995  |
| 1981 | 8 21 0  | 4 DENNIS | 37.1 | 70.4 | 70 995  |
| 1981 | 8 21 6  | 4 DENNIS | 37.8 | 68.0 | 55 998  |
| 1981 | 8 21 12 | 4 DENNIS | 38.1 | 65.4 | 45 1000 |
| 1981 | 8 21 18 | 4 DENNIS | 38.4 | 62.8 | 40 1003 |
| 1981 | 8 22 0  | 4 DENNIS | 37.8 | 59.7 | 35 1005 |
| 1981 | 8 31 12 | 5 EMILY  | 29.8 | 72.7 | 30 1008 |

|      |   |    |    |   |       |      |      |    |      |
|------|---|----|----|---|-------|------|------|----|------|
| 1981 | 8 | 31 | 18 | 5 | EMILY | 29.9 | 71.2 | 30 | 1006 |
| 1981 | 9 | 1  | 0  | 5 | EMILY | 29.9 | 69.7 | 35 | 1004 |
| 1981 | 9 | 1  | 6  | 5 | EMILY | 30.1 | 68.4 | 40 | 1000 |
| 1981 | 9 | 1  | 12 | 5 | EMILY | 30.4 | 67.3 | 40 | 996  |
| 1981 | 9 | 1  | 18 | 5 | EMILY | 31.3 | 66.6 | 45 | 994  |
| 1981 | 9 | 2  | 0  | 5 | EMILY | 31.9 | 65.9 | 50 | 992  |
| 1981 | 9 | 2  | 6  | 5 | EMILY | 32.6 | 65.1 | 50 | 990  |
| 1981 | 9 | 2  | 12 | 5 | EMILY | 33.3 | 64.4 | 50 | 988  |
| 1981 | 9 | 2  | 18 | 5 | EMILY | 34.1 | 64.1 | 55 | 986  |
| 1981 | 9 | 3  | 0  | 5 | EMILY | 35.0 | 64.0 | 55 | 984  |
| 1981 | 9 | 3  | 6  | 5 | EMILY | 36.0 | 65.0 | 60 | 982  |
| 1981 | 9 | 3  | 12 | 5 | EMILY | 35.0 | 65.8 | 60 | 980  |
| 1981 | 9 | 3  | 18 | 5 | EMILY | 34.2 | 65.0 | 60 | 978  |
| 1981 | 9 | 4  | 0  | 5 | EMILY | 34.6 | 63.6 | 65 | 976  |
| 1981 | 9 | 4  | 6  | 5 | EMILY | 35.3 | 62.7 | 70 | 974  |
| 1981 | 9 | 4  | 12 | 5 | EMILY | 36.2 | 61.9 | 70 | 972  |
| 1981 | 9 | 4  | 18 | 5 | EMILY | 37.1 | 61.2 | 70 | 971  |
| 1981 | 9 | 5  | 0  | 5 | EMILY | 38.2 | 60.9 | 75 | 970  |
| 1981 | 9 | 5  | 6  | 5 | EMILY | 38.6 | 60.8 | 75 | 968  |
| 1981 | 9 | 5  | 12 | 5 | EMILY | 39.0 | 60.8 | 75 | 967  |
| 1981 | 9 | 5  | 18 | 5 | EMILY | 39.4 | 59.9 | 80 | 966  |
| 1981 | 9 | 6  | 0  | 5 | EMILY | 39.9 | 59.0 | 80 | 967  |
| 1981 | 9 | 6  | 6  | 5 | EMILY | 40.3 | 58.4 | 80 | 968  |
| 1981 | 9 | 6  | 12 | 5 | EMILY | 40.8 | 58.0 | 80 | 970  |
| 1981 | 9 | 6  | 18 | 5 | EMILY | 41.2 | 57.4 | 75 | 971  |
| 1981 | 9 | 7  | 0  | 5 | EMILY | 41.6 | 56.8 | 75 | 972  |
| 1981 | 9 | 7  | 6  | 5 | EMILY | 41.9 | 55.9 | 70 | 974  |
| 1981 | 9 | 7  | 12 | 5 | EMILY | 42.0 | 55.0 | 70 | 976  |
| 1981 | 9 | 7  | 18 | 5 | EMILY | 42.3 | 54.1 | 65 | 978  |
| 1981 | 9 | 8  | 0  | 5 | EMILY | 42.7 | 53.4 | 60 | 982  |
| 1981 | 9 | 8  | 6  | 5 | EMILY | 42.9 | 52.5 | 60 | 984  |
| 1981 | 9 | 8  | 12 | 5 | EMILY | 42.2 | 51.9 | 55 | 986  |
| 1981 | 9 | 8  | 18 | 5 | EMILY | 41.7 | 51.2 | 55 | 988  |
| 1981 | 9 | 9  | 0  | 5 | EMILY | 41.0 | 50.2 | 55 | 990  |
| 1981 | 9 | 9  | 6  | 5 | EMILY | 40.9 | 49.1 | 50 | 991  |
| 1981 | 9 | 9  | 12 | 5 | EMILY | 40.9 | 47.9 | 50 | 992  |
| 1981 | 9 | 9  | 18 | 5 | EMILY | 41.0 | 46.9 | 50 | 993  |
| 1981 | 9 | 10 | 0  | 5 | EMILY | 41.2 | 45.9 | 45 | 995  |
| 1981 | 9 | 10 | 6  | 5 | EMILY | 41.9 | 45.1 | 40 | 998  |
| 1981 | 9 | 10 | 12 | 5 | EMILY | 42.5 | 44.8 | 40 | 1000 |
| 1981 | 9 | 10 | 18 | 5 | EMILY | 42.7 | 44.0 | 40 | 1001 |
| 1981 | 9 | 11 | 0  | 5 | EMILY | 42.2 | 43.3 | 40 | 1002 |
| 1981 | 9 | 11 | 6  | 5 | EMILY | 42.1 | 42.7 | 35 | 1004 |
| 1981 | 9 | 11 | 12 | 5 | EMILY | 42.2 | 42.0 | 35 | 1005 |

|      |   |    |    |   |       |      |      |     |      |
|------|---|----|----|---|-------|------|------|-----|------|
| 1981 | 9 | 11 | 18 | 5 | EMILY | 42.3 | 41.5 | 30  | 1007 |
| 1981 | 9 | 12 | 0  | 5 | EMILY | 42.7 | 41.0 | 30  | 1008 |
| 1981 | 9 | 3  | 12 | 6 | FLOYD | 16.2 | 60.3 | 20  | 1010 |
| 1981 | 9 | 3  | 18 | 6 | FLOYD | 16.7 | 61.1 | 20  | 1010 |
| 1981 | 9 | 4  | 0  | 6 | FLOYD | 17.3 | 61.9 | 20  | 1009 |
| 1981 | 9 | 4  | 6  | 6 | FLOYD | 18.0 | 62.6 | 20  | 1008 |
| 1981 | 9 | 4  | 12 | 6 | FLOYD | 18.6 | 63.3 | 30  | 1006 |
| 1981 | 9 | 4  | 18 | 6 | FLOYD | 19.0 | 64.0 | 35  | 1004 |
| 1981 | 9 | 5  | 0  | 6 | FLOYD | 19.5 | 64.7 | 43  | 1002 |
| 1981 | 9 | 5  | 6  | 6 | FLOYD | 20.1 | 65.5 | 52  | 1000 |
| 1981 | 9 | 5  | 12 | 6 | FLOYD | 20.9 | 66.2 | 60  | 999  |
| 1981 | 9 | 5  | 18 | 6 | FLOYD | 21.7 | 67.1 | 70  | 997  |
| 1981 | 9 | 6  | 0  | 6 | FLOYD | 22.6 | 67.7 | 80  | 994  |
| 1981 | 9 | 6  | 6  | 6 | FLOYD | 23.6 | 68.6 | 85  | 991  |
| 1981 | 9 | 6  | 12 | 6 | FLOYD | 24.5 | 69.1 | 90  | 988  |
| 1981 | 9 | 6  | 18 | 6 | FLOYD | 25.5 | 69.1 | 95  | 985  |
| 1981 | 9 | 7  | 0  | 6 | FLOYD | 26.4 | 69.1 | 100 | 981  |
| 1981 | 9 | 7  | 6  | 6 | FLOYD | 27.5 | 68.9 | 100 | 978  |
| 1981 | 9 | 7  | 12 | 6 | FLOYD | 28.4 | 68.5 | 100 | 975  |
| 1981 | 9 | 7  | 18 | 6 | FLOYD | 29.3 | 67.8 | 100 | 975  |
| 1981 | 9 | 8  | 0  | 6 | FLOYD | 29.9 | 67.2 | 95  | 989  |
| 1981 | 9 | 8  | 6  | 6 | FLOYD | 30.6 | 66.5 | 90  | 995  |
| 1981 | 9 | 8  | 12 | 6 | FLOYD | 31.4 | 65.6 | 85  | 998  |
| 1981 | 9 | 8  | 18 | 6 | FLOYD | 32.0 | 64.7 | 60  | 1003 |
| 1981 | 9 | 9  | 0  | 6 | FLOYD | 32.9 | 63.0 | 50  | 1005 |
| 1981 | 9 | 9  | 6  | 6 | FLOYD | 33.7 | 60.7 | 45  | 1007 |
| 1981 | 9 | 9  | 12 | 6 | FLOYD | 34.2 | 58.5 | 45  | 1007 |
| 1981 | 9 | 9  | 18 | 6 | FLOYD | 33.8 | 56.3 | 40  | 1007 |
| 1981 | 9 | 10 | 0  | 6 | FLOYD | 33.5 | 54.0 | 40  | 1007 |
| 1981 | 9 | 10 | 6  | 6 | FLOYD | 33.6 | 51.3 | 40  | 1007 |
| 1981 | 9 | 10 | 12 | 6 | FLOYD | 34.0 | 48.7 | 40  | 1008 |
| 1981 | 9 | 10 | 18 | 6 | FLOYD | 34.0 | 46.4 | 40  | 1008 |
| 1981 | 9 | 11 | 0  | 6 | FLOYD | 33.8 | 44.1 | 40  | 1008 |
| 1981 | 9 | 11 | 6  | 6 | FLOYD | 34.5 | 41.7 | 40  | 1008 |
| 1981 | 9 | 11 | 12 | 6 | FLOYD | 35.5 | 39.7 | 40  | 1008 |
| 1981 | 9 | 11 | 18 | 6 | FLOYD | 36.6 | 38.3 | 40  | 1008 |
| 1981 | 9 | 12 | 0  | 6 | FLOYD | 37.6 | 36.9 | 40  | 1009 |
| 1981 | 9 | 12 | 6  | 6 | FLOYD | 39.0 | 35.2 | 40  | 1009 |
| 1981 | 9 | 12 | 12 | 6 | FLOYD | 40.6 | 33.4 | 35  | 1009 |
| 1981 | 9 | 7  | 0  | 7 | GERT  | 14.8 | 54.0 | 25  | 1013 |
| 1981 | 9 | 7  | 6  | 7 | GERT  | 14.9 | 55.7 | 30  | 1012 |
| 1981 | 9 | 7  | 12 | 7 | GERT  | 15.1 | 57.4 | 30  | 1012 |
| 1981 | 9 | 7  | 18 | 7 | GERT  | 15.3 | 59.0 | 30  | 1010 |
| 1981 | 9 | 8  | 0  | 7 | GERT  | 15.6 | 60.6 | 40  | 1008 |

|      |   |    |    |   |        |      |      |     |      |
|------|---|----|----|---|--------|------|------|-----|------|
| 1981 | 9 | 8  | 6  | 7 | GERT   | 16.1 | 62.3 | 45  | 1005 |
| 1981 | 9 | 8  | 12 | 7 | GERT   | 16.8 | 64.0 | 50  | 1002 |
| 1981 | 9 | 8  | 18 | 7 | GERT   | 17.8 | 65.4 | 50  | 1004 |
| 1981 | 9 | 9  | 0  | 7 | GERT   | 18.9 | 66.9 | 45  | 1006 |
| 1981 | 9 | 9  | 6  | 7 | GERT   | 19.6 | 68.3 | 40  | 1009 |
| 1981 | 9 | 9  | 12 | 7 | GERT   | 20.3 | 70.0 | 35  | 1011 |
| 1981 | 9 | 9  | 18 | 7 | GERT   | 21.3 | 71.7 | 35  | 1012 |
| 1981 | 9 | 10 | 0  | 7 | GERT   | 22.1 | 72.8 | 40  | 1010 |
| 1981 | 9 | 10 | 6  | 7 | GERT   | 22.7 | 73.7 | 50  | 1008 |
| 1981 | 9 | 10 | 12 | 7 | GERT   | 23.7 | 74.5 | 60  | 1001 |
| 1981 | 9 | 10 | 18 | 7 | GERT   | 24.8 | 74.4 | 70  | 996  |
| 1981 | 9 | 11 | 0  | 7 | GERT   | 26.3 | 73.9 | 80  | 993  |
| 1981 | 9 | 11 | 6  | 7 | GERT   | 27.7 | 73.0 | 85  | 990  |
| 1981 | 9 | 11 | 12 | 7 | GERT   | 29.0 | 72.0 | 90  | 988  |
| 1981 | 9 | 11 | 18 | 7 | GERT   | 30.2 | 70.9 | 90  | 988  |
| 1981 | 9 | 12 | 0  | 7 | GERT   | 31.5 | 69.6 | 90  | 989  |
| 1981 | 9 | 12 | 6  | 7 | GERT   | 32.5 | 68.5 | 90  | 990  |
| 1981 | 9 | 12 | 12 | 7 | GERT   | 33.4 | 67.1 | 85  | 992  |
| 1981 | 9 | 12 | 18 | 7 | GERT   | 34.1 | 65.6 | 70  | 997  |
| 1981 | 9 | 13 | 0  | 7 | GERT   | 34.9 | 63.5 | 60  | 1002 |
| 1981 | 9 | 13 | 6  | 7 | GERT   | 35.8 | 60.7 | 55  | 1006 |
| 1981 | 9 | 13 | 12 | 7 | GERT   | 36.8 | 57.0 | 50  | 1008 |
| 1981 | 9 | 13 | 18 | 7 | GERT   | 37.7 | 53.2 | 45  | 1010 |
| 1981 | 9 | 14 | 0  | 7 | GERT   | 38.3 | 49.4 | 40  | 1010 |
| 1981 | 9 | 14 | 6  | 7 | GERT   | 38.8 | 45.6 | 40  | 1011 |
| 1981 | 9 | 14 | 12 | 7 | GERT   | 39.2 | 41.9 | 35  | 1012 |
| 1981 | 9 | 14 | 18 | 7 | GERT   | 39.6 | 38.6 | 30  | 1012 |
| 1981 | 9 | 15 | 0  | 7 | GERT   | 39.9 | 35.3 | 30  | 1012 |
| 1981 | 9 | 15 | 6  | 7 | GERT   | 40.1 | 33.0 | 25  | 1012 |
| 1981 | 9 | 15 | 12 | 7 | GERT   | 40.3 | 30.7 | 25  | 1012 |
| 1981 | 9 | 15 | 18 | 7 | GERT   | 40.5 | 28.2 | 20  | 1012 |
| 1981 | 9 | 11 | 18 | 8 | HARVEY | 14.0 | 49.0 | 25  | 1009 |
| 1981 | 9 | 12 | 0  | 8 | HARVEY | 15.4 | 50.7 | 25  | 1006 |
| 1981 | 9 | 12 | 6  | 8 | HARVEY | 17.1 | 52.7 | 25  | 1003 |
| 1981 | 9 | 12 | 12 | 8 | HARVEY | 18.4 | 54.7 | 30  | 1001 |
| 1981 | 9 | 12 | 18 | 8 | HARVEY | 19.4 | 56.3 | 40  | 995  |
| 1981 | 9 | 13 | 0  | 8 | HARVEY | 20.2 | 57.8 | 70  | 990  |
| 1981 | 9 | 13 | 6  | 8 | HARVEY | 21.2 | 59.3 | 70  | 985  |
| 1981 | 9 | 13 | 12 | 8 | HARVEY | 22.2 | 60.6 | 75  | 983  |
| 1981 | 9 | 13 | 18 | 8 | HARVEY | 23.1 | 61.4 | 80  | 980  |
| 1981 | 9 | 14 | 0  | 8 | HARVEY | 24.1 | 62.0 | 85  | 978  |
| 1981 | 9 | 14 | 6  | 8 | HARVEY | 25.2 | 62.5 | 90  | 976  |
| 1981 | 9 | 14 | 12 | 8 | HARVEY | 26.4 | 62.7 | 95  | 960  |
| 1981 | 9 | 14 | 18 | 8 | HARVEY | 27.6 | 62.8 | 110 | 952  |

|      |      |    |          |      |      |     |      |
|------|------|----|----------|------|------|-----|------|
| 1981 | 9 15 | 0  | 8 HARVEY | 28.4 | 62.6 | 115 | 946  |
| 1981 | 9 15 | 6  | 8 HARVEY | 29.5 | 62.3 | 110 | 952  |
| 1981 | 9 15 | 12 | 8 HARVEY | 30.8 | 61.2 | 105 | 958  |
| 1981 | 9 15 | 18 | 8 HARVEY | 32.1 | 60.3 | 100 | 963  |
| 1981 | 9 16 | 0  | 8 HARVEY | 33.2 | 59.2 | 90  | 970  |
| 1981 | 9 16 | 6  | 8 HARVEY | 34.2 | 58.0 | 85  | 975  |
| 1981 | 9 16 | 12 | 8 HARVEY | 34.9 | 56.8 | 80  | 980  |
| 1981 | 9 16 | 18 | 8 HARVEY | 35.3 | 55.7 | 65  | 990  |
| 1981 | 9 17 | 0  | 8 HARVEY | 35.7 | 54.8 | 65  | 991  |
| 1981 | 9 17 | 6  | 8 HARVEY | 35.9 | 53.8 | 65  | 992  |
| 1981 | 9 17 | 12 | 8 HARVEY | 36.2 | 52.7 | 65  | 993  |
| 1981 | 9 17 | 18 | 8 HARVEY | 36.5 | 51.3 | 65  | 995  |
| 1981 | 9 18 | 0  | 8 HARVEY | 37.1 | 49.9 | 65  | 996  |
| 1981 | 9 18 | 6  | 8 HARVEY | 37.5 | 48.2 | 65  | 997  |
| 1981 | 9 18 | 12 | 8 HARVEY | 37.9 | 46.8 | 55  | 998  |
| 1981 | 9 18 | 18 | 8 HARVEY | 38.3 | 45.2 | 45  | 1002 |
| 1981 | 9 19 | 0  | 8 HARVEY | 38.5 | 43.0 | 35  | 1005 |
| 1981 | 9 19 | 6  | 8 HARVEY | 38.3 | 40.6 | 25  | 1006 |
| 1981 | 9 19 | 12 | 8 HARVEY | 38.1 | 38.0 | 25  | 1007 |
| 1981 | 9 19 | 18 | 8 HARVEY | 37.7 | 35.3 | 25  | 1008 |
| 1981 | 9 20 | 0  | 8 HARVEY | 36.7 | 32.8 | 25  | 1009 |
| 1981 | 9 21 | 12 | 9 IRENE  | 13.5 | 32.5 | 25  | 1015 |
| 1981 | 9 21 | 18 | 9 IRENE  | 13.3 | 33.6 | 25  | 1013 |
| 1981 | 9 22 | 0  | 9 IRENE  | 13.1 | 34.9 | 25  | 1012 |
| 1981 | 9 22 | 6  | 9 IRENE  | 12.8 | 36.0 | 30  | 1011 |
| 1981 | 9 22 | 12 | 9 IRENE  | 12.6 | 37.2 | 30  | 1010 |
| 1981 | 9 22 | 18 | 9 IRENE  | 12.5 | 38.4 | 30  | 1009 |
| 1981 | 9 23 | 0  | 9 IRENE  | 12.4 | 39.6 | 30  | 1007 |
| 1981 | 9 23 | 6  | 9 IRENE  | 12.5 | 40.8 | 35  | 1005 |
| 1981 | 9 23 | 12 | 9 IRENE  | 12.7 | 42.2 | 40  | 1003 |
| 1981 | 9 23 | 18 | 9 IRENE  | 13.0 | 43.8 | 45  | 1001 |
| 1981 | 9 24 | 0  | 9 IRENE  | 13.3 | 45.3 | 45  | 999  |
| 1981 | 9 24 | 6  | 9 IRENE  | 13.8 | 46.7 | 50  | 996  |
| 1981 | 9 24 | 12 | 9 IRENE  | 14.3 | 47.8 | 55  | 994  |
| 1981 | 9 24 | 18 | 9 IRENE  | 15.0 | 48.9 | 60  | 991  |
| 1981 | 9 25 | 0  | 9 IRENE  | 15.6 | 50.1 | 65  | 987  |
| 1981 | 9 25 | 6  | 9 IRENE  | 16.6 | 51.2 | 70  | 983  |
| 1981 | 9 25 | 12 | 9 IRENE  | 17.4 | 52.0 | 80  | 980  |
| 1981 | 9 25 | 18 | 9 IRENE  | 18.2 | 52.8 | 90  | 977  |
| 1981 | 9 26 | 0  | 9 IRENE  | 19.1 | 53.5 | 85  | 976  |
| 1981 | 9 26 | 6  | 9 IRENE  | 19.7 | 54.3 | 80  | 976  |
| 1981 | 9 26 | 12 | 9 IRENE  | 20.3 | 55.1 | 80  | 980  |
| 1981 | 9 26 | 18 | 9 IRENE  | 21.0 | 55.7 | 85  | 982  |
| 1981 | 9 27 | 0  | 9 IRENE  | 21.8 | 56.4 | 95  | 968  |

|      |    |    |    |    |         |      |      |     |      |
|------|----|----|----|----|---------|------|------|-----|------|
| 1981 | 9  | 27 | 6  | 9  | IRENE   | 22.4 | 56.8 | 90  | 966  |
| 1981 | 9  | 27 | 12 | 9  | IRENE   | 23.0 | 57.2 | 90  | 970  |
| 1981 | 9  | 27 | 18 | 9  | IRENE   | 23.8 | 57.2 | 95  | 966  |
| 1981 | 9  | 28 | 0  | 9  | IRENE   | 24.7 | 56.9 | 100 | 962  |
| 1981 | 9  | 28 | 6  | 9  | IRENE   | 25.8 | 56.8 | 105 | 966  |
| 1981 | 9  | 28 | 12 | 9  | IRENE   | 27.0 | 56.7 | 105 | 959  |
| 1981 | 9  | 28 | 18 | 9  | IRENE   | 28.4 | 56.2 | 105 | 960  |
| 1981 | 9  | 29 | 0  | 9  | IRENE   | 29.8 | 55.3 | 100 | 962  |
| 1981 | 9  | 29 | 6  | 9  | IRENE   | 31.3 | 54.0 | 100 | 965  |
| 1981 | 9  | 29 | 12 | 9  | IRENE   | 32.6 | 52.6 | 95  | 968  |
| 1981 | 9  | 29 | 18 | 9  | IRENE   | 34.1 | 50.4 | 90  | 972  |
| 1981 | 9  | 30 | 0  | 9  | IRENE   | 35.9 | 47.5 | 85  | 976  |
| 1981 | 9  | 30 | 6  | 9  | IRENE   | 37.5 | 45.1 | 80  | 980  |
| 1981 | 9  | 30 | 12 | 9  | IRENE   | 38.9 | 42.4 | 75  | 983  |
| 1981 | 9  | 30 | 18 | 9  | IRENE   | 40.0 | 39.5 | 70  | 986  |
| 1981 | 10 | 1  | 0  | 9  | IRENE   | 41.3 | 36.1 | 65  | 989  |
| 1981 | 10 | 1  | 6  | 9  | IRENE   | 42.5 | 33.7 | 60  | 991  |
| 1981 | 10 | 1  | 12 | 9  | IRENE   | 43.7 | 32.0 | 60  | 994  |
| 1981 | 10 | 1  | 18 | 9  | IRENE   | 44.8 | 30.3 | 55  | 996  |
| 1981 | 10 | 2  | 0  | 9  | IRENE   | 45.1 | 28.5 | 50  | 999  |
| 1981 | 10 | 2  | 6  | 9  | IRENE   | 45.4 | 25.0 | 45  | 0    |
| 1981 | 10 | 2  | 12 | 9  | IRENE   | 45.2 | 21.0 | 45  | 0    |
| 1981 | 10 | 2  | 18 | 9  | IRENE   | 44.5 | 17.0 | 45  | 0    |
| 1981 | 10 | 3  | 0  | 9  | IRENE   | 43.6 | 11.5 | 45  | 0    |
| 1981 | 10 | 3  | 6  | 9  | IRENE   | 45.0 | 4.0  | 45  | 0    |
| 1981 | 10 | 29 | 12 | 10 | JOSE    | 25.0 | 47.5 | 25  | 1010 |
| 1981 | 10 | 29 | 18 | 10 | JOSE    | 26.4 | 47.1 | 30  | 1008 |
| 1981 | 10 | 30 | 0  | 10 | JOSE    | 27.7 | 46.6 | 35  | 1006 |
| 1981 | 10 | 30 | 6  | 10 | JOSE    | 28.7 | 45.9 | 35  | 1004 |
| 1981 | 10 | 30 | 12 | 10 | JOSE    | 29.6 | 45.2 | 35  | 1004 |
| 1981 | 10 | 30 | 18 | 10 | JOSE    | 30.2 | 44.5 | 35  | 1002 |
| 1981 | 10 | 31 | 0  | 10 | JOSE    | 30.7 | 43.9 | 35  | 1002 |
| 1981 | 10 | 31 | 6  | 10 | JOSE    | 31.1 | 43.1 | 40  | 1000 |
| 1981 | 10 | 31 | 12 | 10 | JOSE    | 31.5 | 42.2 | 45  | 998  |
| 1981 | 10 | 31 | 18 | 10 | JOSE    | 31.9 | 40.8 | 45  | 998  |
| 1981 | 11 | 1  | 0  | 10 | JOSE    | 32.5 | 39.0 | 40  | 998  |
| 1981 | 11 | 1  | 6  | 10 | JOSE    | 33.7 | 37.0 | 40  | 998  |
| 1981 | 11 | 1  | 12 | 10 | JOSE    | 35.3 | 34.9 | 35  | 998  |
| 1981 | 11 | 1  | 18 | 10 | JOSE    | 37.8 | 32.1 | 30  | 998  |
| 1981 | 11 | 2  | 0  | 10 | JOSE    | 41.5 | 29.5 | 25  | 0    |
| 1981 | 11 | 3  | 0  | 11 | KATRINA | 16.9 | 81.2 | 25  | 1005 |
| 1981 | 11 | 3  | 6  | 11 | KATRINA | 17.2 | 81.3 | 25  | 1005 |
| 1981 | 11 | 3  | 12 | 11 | KATRINA | 17.5 | 81.4 | 25  | 1004 |
| 1981 | 11 | 3  | 18 | 11 | KATRINA | 17.8 | 81.4 | 30  | 1002 |



|      |    |    |    |    |           |      |      |    |      |
|------|----|----|----|----|-----------|------|------|----|------|
| 1981 | 11 | 4  | 0  | 11 | KATRINA   | 18.1 | 81.4 | 30 | 1001 |
| 1981 | 11 | 4  | 6  | 11 | KATRINA   | 18.3 | 81.4 | 35 | 1000 |
| 1981 | 11 | 4  | 12 | 11 | KATRINA   | 18.6 | 81.3 | 40 | 998  |
| 1981 | 11 | 4  | 18 | 11 | KATRINA   | 18.9 | 81.2 | 50 | 996  |
| 1981 | 11 | 5  | 0  | 11 | KATRINA   | 19.2 | 81.1 | 60 | 993  |
| 1981 | 11 | 5  | 6  | 11 | KATRINA   | 19.6 | 80.8 | 65 | 988  |
| 1981 | 11 | 5  | 12 | 11 | KATRINA   | 20.0 | 80.5 | 75 | 980  |
| 1981 | 11 | 5  | 18 | 11 | KATRINA   | 20.4 | 80.1 | 70 | 988  |
| 1981 | 11 | 6  | 0  | 11 | KATRINA   | 20.9 | 79.5 | 65 | 996  |
| 1981 | 11 | 6  | 6  | 11 | KATRINA   | 21.6 | 78.3 | 55 | 999  |
| 1981 | 11 | 6  | 12 | 11 | KATRINA   | 22.4 | 77.0 | 50 | 1001 |
| 1981 | 11 | 6  | 18 | 11 | KATRINA   | 23.2 | 75.5 | 45 | 1001 |
| 1981 | 11 | 7  | 0  | 11 | KATRINA   | 24.0 | 73.3 | 40 | 1001 |
| 1981 | 11 | 7  | 6  | 11 | KATRINA   | 25.0 | 70.6 | 40 | 1002 |
| 1981 | 11 | 7  | 12 | 11 | KATRINA   | 25.9 | 67.5 | 40 | 1002 |
| 1981 | 11 | 7  | 18 | 11 | KATRINA   | 26.8 | 64.5 | 40 | 1002 |
| 1981 | 11 | 12 | 12 | 12 | SUBTROP 3 | 31.0 | 74.0 | 45 | 1004 |
| 1981 | 11 | 12 | 18 | 12 | SUBTROP 3 | 31.4 | 73.1 | 45 | 1003 |
| 1981 | 11 | 13 | 0  | 12 | SUBTROP 3 | 31.8 | 72.3 | 50 | 1001 |
| 1981 | 11 | 13 | 6  | 12 | SUBTROP 3 | 32.2 | 71.6 | 55 | 999  |
| 1981 | 11 | 13 | 12 | 12 | SUBTROP 3 | 32.7 | 71.0 | 55 | 997  |
| 1981 | 11 | 13 | 18 | 12 | SUBTROP 3 | 33.2 | 70.6 | 55 | 995  |
| 1981 | 11 | 14 | 0  | 12 | SUBTROP 3 | 33.7 | 70.6 | 60 | 993  |
| 1981 | 11 | 14 | 6  | 12 | SUBTROP 3 | 34.3 | 70.8 | 60 | 991  |
| 1981 | 11 | 14 | 12 | 12 | SUBTROP 3 | 34.8 | 71.1 | 60 | 989  |
| 1981 | 11 | 14 | 18 | 12 | SUBTROP 3 | 35.3 | 71.4 | 60 | 986  |
| 1981 | 11 | 15 | 0  | 12 | SUBTROP 3 | 35.8 | 71.8 | 60 | 984  |
| 1981 | 11 | 15 | 6  | 12 | SUBTROP 3 | 36.5 | 71.9 | 60 | 981  |
| 1981 | 11 | 15 | 12 | 12 | SUBTROP 3 | 37.2 | 71.8 | 60 | 979  |
| 1981 | 11 | 15 | 18 | 12 | SUBTROP 3 | 37.9 | 71.4 | 60 | 978  |
| 1981 | 11 | 16 | 0  | 12 | SUBTROP 3 | 38.6 | 70.9 | 60 | 978  |
| 1981 | 11 | 16 | 6  | 12 | SUBTROP 3 | 39.3 | 70.2 | 55 | 979  |
| 1981 | 11 | 16 | 12 | 12 | SUBTROP 3 | 40.0 | 69.5 | 55 | 981  |
| 1981 | 11 | 16 | 18 | 12 | SUBTROP 3 | 40.7 | 68.5 | 55 | 983  |
| 1981 | 11 | 17 | 0  | 12 | SUBTROP 3 | 41.4 | 67.1 | 50 | 985  |
| 1981 | 11 | 17 | 6  | 12 | SUBTROP 3 | 42.9 | 65.8 | 45 | 990  |
| 1982 | 6  | 2  | 12 | 1  | ALBERTO   | 21.7 | 87.1 | 20 | 1005 |
| 1982 | 6  | 2  | 18 | 1  | ALBERTO   | 22.2 | 86.5 | 25 | 1004 |
| 1982 | 6  | 3  | 0  | 1  | ALBERTO   | 22.6 | 85.8 | 30 | 1003 |
| 1982 | 6  | 3  | 6  | 1  | ALBERTO   | 22.8 | 85.0 | 40 | 1001 |
| 1982 | 6  | 3  | 12 | 1  | ALBERTO   | 23.2 | 84.2 | 50 | 995  |
| 1982 | 6  | 3  | 18 | 1  | ALBERTO   | 24.0 | 83.6 | 75 | 985  |
| 1982 | 6  | 4  | 0  | 1  | ALBERTO   | 24.8 | 83.4 | 65 | 992  |
| 1982 | 6  | 4  | 6  | 1  | ALBERTO   | 24.9 | 84.1 | 55 | 998  |

|      |   |    |    |   |           |      |      |    |      |
|------|---|----|----|---|-----------|------|------|----|------|
| 1982 | 6 | 4  | 12 | 1 | ALBERTO   | 24.9 | 84.8 | 45 | 1002 |
| 1982 | 6 | 4  | 18 | 1 | ALBERTO   | 25.0 | 84.2 | 40 | 1005 |
| 1982 | 6 | 5  | 0  | 1 | ALBERTO   | 25.1 | 84.1 | 30 | 1007 |
| 1982 | 6 | 5  | 6  | 1 | ALBERTO   | 25.2 | 84.0 | 25 | 1008 |
| 1982 | 6 | 5  | 12 | 1 | ALBERTO   | 25.3 | 83.9 | 25 | 1009 |
| 1982 | 6 | 5  | 18 | 1 | ALBERTO   | 25.4 | 83.6 | 25 | 1010 |
| 1982 | 6 | 6  | 0  | 1 | ALBERTO   | 25.5 | 83.3 | 25 | 1010 |
| 1982 | 6 | 6  | 6  | 1 | ALBERTO   | 25.5 | 83.0 | 25 | 1010 |
| 1982 | 6 | 6  | 12 | 1 | ALBERTO   | 25.5 | 82.6 | 20 | 1010 |
| 1982 | 6 | 18 | 0  | 2 | SUBTROP 1 | 25.8 | 86.4 | 25 | 1004 |
| 1982 | 6 | 18 | 6  | 2 | SUBTROP 1 | 27.1 | 84.6 | 30 | 1003 |
| 1982 | 6 | 18 | 12 | 2 | SUBTROP 1 | 28.7 | 82.8 | 40 | 999  |
| 1982 | 6 | 18 | 18 | 2 | SUBTROP 1 | 31.4 | 80.3 | 60 | 992  |
| 1982 | 6 | 19 | 0  | 2 | SUBTROP 1 | 32.5 | 79.2 | 60 | 992  |
| 1982 | 6 | 19 | 6  | 2 | SUBTROP 1 | 33.9 | 77.8 | 60 | 992  |
| 1982 | 6 | 19 | 12 | 2 | SUBTROP 1 | 35.3 | 76.0 | 60 | 992  |
| 1982 | 6 | 19 | 18 | 2 | SUBTROP 1 | 37.1 | 73.0 | 60 | 992  |
| 1982 | 6 | 20 | 0  | 2 | SUBTROP 1 | 39.5 | 70.0 | 60 | 992  |
| 1982 | 6 | 20 | 6  | 2 | SUBTROP 1 | 42.5 | 65.5 | 60 | 988  |
| 1982 | 6 | 20 | 12 | 2 | SUBTROP 1 | 44.5 | 60.0 | 60 | 984  |
| 1982 | 6 | 20 | 18 | 2 | SUBTROP 1 | 45.4 | 56.0 | 60 | 990  |
| 1982 | 8 | 28 | 12 | 3 | BERYL     | 13.7 | 22.2 | 30 | 1008 |
| 1982 | 8 | 28 | 18 | 3 | BERYL     | 13.9 | 22.7 | 35 | 1006 |
| 1982 | 8 | 29 | 0  | 3 | BERYL     | 14.1 | 23.6 | 37 | 1005 |
| 1982 | 8 | 29 | 6  | 3 | BERYL     | 14.5 | 24.9 | 40 | 1003 |
| 1982 | 8 | 29 | 12 | 3 | BERYL     | 14.9 | 26.3 | 43 | 1002 |
| 1982 | 8 | 29 | 18 | 3 | BERYL     | 15.3 | 27.7 | 45 | 1000 |
| 1982 | 8 | 30 | 0  | 3 | BERYL     | 15.7 | 29.1 | 48 | 999  |
| 1982 | 8 | 30 | 6  | 3 | BERYL     | 16.0 | 30.6 | 50 | 998  |
| 1982 | 8 | 30 | 12 | 3 | BERYL     | 16.3 | 32.1 | 52 | 996  |
| 1982 | 8 | 30 | 18 | 3 | BERYL     | 16.7 | 33.6 | 54 | 995  |
| 1982 | 8 | 31 | 0  | 3 | BERYL     | 17.0 | 35.0 | 56 | 993  |
| 1982 | 8 | 31 | 6  | 3 | BERYL     | 17.2 | 36.4 | 58 | 992  |
| 1982 | 8 | 31 | 12 | 3 | BERYL     | 17.7 | 37.8 | 60 | 991  |
| 1982 | 8 | 31 | 18 | 3 | BERYL     | 18.0 | 39.0 | 62 | 990  |
| 1982 | 9 | 1  | 0  | 3 | BERYL     | 18.3 | 40.0 | 63 | 989  |
| 1982 | 9 | 1  | 6  | 3 | BERYL     | 18.6 | 40.9 | 63 | 998  |
| 1982 | 9 | 1  | 12 | 3 | BERYL     | 18.8 | 41.7 | 63 | 998  |
| 1982 | 9 | 1  | 18 | 3 | BERYL     | 19.0 | 42.4 | 62 | 990  |
| 1982 | 9 | 2  | 0  | 3 | BERYL     | 19.2 | 43.2 | 55 | 994  |
| 1982 | 9 | 2  | 6  | 3 | BERYL     | 19.4 | 44.1 | 45 | 1000 |
| 1982 | 9 | 2  | 12 | 3 | BERYL     | 19.7 | 45.1 | 35 | 1005 |
| 1982 | 9 | 2  | 18 | 3 | BERYL     | 19.9 | 46.2 | 31 | 1008 |
| 1982 | 9 | 3  | 0  | 3 | BERYL     | 20.1 | 47.4 | 30 | 1009 |

|      |   |    |    |   |       |      |      |    |      |
|------|---|----|----|---|-------|------|------|----|------|
| 1982 | 9 | 3  | 6  | 3 | BERYL | 20.1 | 48.6 | 30 | 1009 |
| 1982 | 9 | 3  | 12 | 3 | BERYL | 20.0 | 49.8 | 33 | 1006 |
| 1982 | 9 | 3  | 18 | 3 | BERYL | 20.0 | 51.0 | 33 | 1006 |
| 1982 | 9 | 4  | 0  | 3 | BERYL | 19.9 | 51.9 | 32 | 1008 |
| 1982 | 9 | 4  | 6  | 3 | BERYL | 19.9 | 52.9 | 31 | 1009 |
| 1982 | 9 | 4  | 12 | 3 | BERYL | 19.8 | 53.8 | 30 | 1009 |
| 1982 | 9 | 4  | 18 | 3 | BERYL | 19.7 | 54.9 | 29 | 1009 |
| 1982 | 9 | 5  | 0  | 3 | BERYL | 19.6 | 55.9 | 28 | 1009 |
| 1982 | 9 | 5  | 6  | 3 | BERYL | 19.4 | 57.0 | 27 | 1009 |
| 1982 | 9 | 5  | 12 | 3 | BERYL | 19.4 | 58.3 | 27 | 1010 |
| 1982 | 9 | 5  | 18 | 3 | BERYL | 19.5 | 59.7 | 28 | 1010 |
| 1982 | 9 | 6  | 0  | 3 | BERYL | 19.7 | 61.0 | 29 | 1010 |
| 1982 | 9 | 6  | 6  | 3 | BERYL | 19.8 | 62.3 | 28 | 1010 |
| 1982 | 9 | 6  | 12 | 3 | BERYL | 20.0 | 63.6 | 27 | 1010 |
| 1982 | 9 | 9  | 0  | 4 | CHRIS | 26.2 | 91.0 | 25 | 1010 |
| 1982 | 9 | 9  | 6  | 4 | CHRIS | 26.3 | 91.7 | 25 | 1010 |
| 1982 | 9 | 9  | 12 | 4 | CHRIS | 26.4 | 92.3 | 25 | 1009 |
| 1982 | 9 | 9  | 18 | 4 | CHRIS | 26.6 | 93.0 | 30 | 1009 |
| 1982 | 9 | 10 | 0  | 4 | CHRIS | 26.8 | 93.1 | 30 | 1008 |
| 1982 | 9 | 10 | 6  | 4 | CHRIS | 26.9 | 94.0 | 30 | 1007 |
| 1982 | 9 | 10 | 12 | 4 | CHRIS | 27.3 | 94.2 | 35 | 1005 |
| 1982 | 9 | 10 | 18 | 4 | CHRIS | 27.9 | 94.1 | 45 | 1001 |
| 1982 | 9 | 11 | 0  | 4 | CHRIS | 28.4 | 94.1 | 50 | 1000 |
| 1982 | 9 | 11 | 6  | 4 | CHRIS | 29.0 | 94.0 | 50 | 997  |
| 1982 | 9 | 11 | 12 | 4 | CHRIS | 29.8 | 93.8 | 55 | 994  |
| 1982 | 9 | 11 | 18 | 4 | CHRIS | 30.8 | 93.4 | 40 | 999  |
| 1982 | 9 | 12 | 0  | 4 | CHRIS | 31.8 | 93.2 | 30 | 1004 |
| 1982 | 9 | 12 | 6  | 4 | CHRIS | 32.8 | 92.8 | 30 | 1006 |
| 1982 | 9 | 12 | 12 | 4 | CHRIS | 33.8 | 92.4 | 30 | 1008 |
| 1982 | 9 | 12 | 18 | 4 | CHRIS | 34.8 | 91.8 | 25 | 1010 |
| 1982 | 9 | 13 | 12 | 5 | DEBBY | 19.8 | 69.5 | 30 | 1010 |
| 1982 | 9 | 13 | 18 | 5 | DEBBY | 20.8 | 70.2 | 30 | 1009 |
| 1982 | 9 | 14 | 0  | 5 | DEBBY | 21.5 | 71.0 | 30 | 1009 |
| 1982 | 9 | 14 | 6  | 5 | DEBBY | 22.4 | 71.8 | 30 | 1008 |
| 1982 | 9 | 14 | 12 | 5 | DEBBY | 23.5 | 71.9 | 35 | 1006 |
| 1982 | 9 | 14 | 18 | 5 | DEBBY | 24.6 | 71.8 | 55 | 1000 |
| 1982 | 9 | 15 | 0  | 5 | DEBBY | 25.6 | 71.0 | 65 | 993  |
| 1982 | 9 | 15 | 6  | 5 | DEBBY | 26.7 | 70.3 | 65 | 990  |
| 1982 | 9 | 15 | 12 | 5 | DEBBY | 27.8 | 69.6 | 75 | 980  |
| 1982 | 9 | 15 | 18 | 5 | DEBBY | 29.0 | 68.5 | 90 | 969  |
| 1982 | 9 | 16 | 0  | 5 | DEBBY | 30.5 | 67.5 | 95 | 966  |
| 1982 | 9 | 16 | 6  | 5 | DEBBY | 32.1 | 66.7 | 95 | 966  |
| 1982 | 9 | 16 | 12 | 5 | DEBBY | 33.6 | 65.8 | 95 | 966  |
| 1982 | 9 | 16 | 18 | 5 | DEBBY | 35.1 | 65.6 | 95 | 966  |

|      |    |    |    |   |         |      |      |     |      |
|------|----|----|----|---|---------|------|------|-----|------|
| 1982 | 9  | 17 | 0  | 5 | DEBBY   | 36.4 | 65.6 | 95  | 966  |
| 1982 | 9  | 17 | 6  | 5 | DEBBY   | 36.8 | 65.6 | 95  | 966  |
| 1982 | 9  | 17 | 12 | 5 | DEBBY   | 37.1 | 65.0 | 95  | 966  |
| 1982 | 9  | 17 | 18 | 5 | DEBBY   | 37.6 | 63.5 | 100 | 960  |
| 1982 | 9  | 18 | 0  | 5 | DEBBY   | 38.8 | 62.3 | 115 | 950  |
| 1982 | 9  | 18 | 6  | 5 | DEBBY   | 40.1 | 60.7 | 110 | 952  |
| 1982 | 9  | 18 | 12 | 5 | DEBBY   | 41.6 | 58.5 | 110 | 954  |
| 1982 | 9  | 18 | 18 | 5 | DEBBY   | 43.5 | 56.1 | 100 | 960  |
| 1982 | 9  | 19 | 0  | 5 | DEBBY   | 45.3 | 53.5 | 90  | 970  |
| 1982 | 9  | 19 | 6  | 5 | DEBBY   | 47.0 | 50.5 | 75  | 979  |
| 1982 | 9  | 19 | 12 | 5 | DEBBY   | 48.5 | 47.1 | 70  | 987  |
| 1982 | 9  | 19 | 18 | 5 | DEBBY   | 50.0 | 43.5 | 70  | 987  |
| 1982 | 9  | 20 | 0  | 5 | DEBBY   | 50.8 | 39.0 | 70  | 987  |
| 1982 | 9  | 20 | 6  | 5 | DEBBY   | 51.5 | 33.5 | 60  | 993  |
| 1982 | 9  | 20 | 12 | 5 | DEBBY   | 51.8 | 26.6 | 50  | 996  |
| 1982 | 9  | 20 | 18 | 5 | DEBBY   | 51.5 | 19.0 | 50  | 996  |
| 1982 | 9  | 30 | 12 | 6 | ERNESTO | 24.8 | 65.4 | 30  | 1006 |
| 1982 | 9  | 30 | 18 | 6 | ERNESTO | 25.3 | 66.8 | 30  | 1005 |
| 1982 | 10 | 1  | 0  | 6 | ERNESTO | 25.9 | 67.4 | 30  | 1005 |
| 1982 | 10 | 1  | 6  | 6 | ERNESTO | 26.5 | 67.8 | 35  | 1004 |
| 1982 | 10 | 1  | 12 | 6 | ERNESTO | 27.3 | 67.7 | 40  | 1003 |
| 1982 | 10 | 1  | 18 | 6 | ERNESTO | 27.9 | 67.1 | 50  | 1000 |
| 1982 | 10 | 2  | 0  | 6 | ERNESTO | 28.5 | 66.2 | 60  | 997  |
| 1982 | 10 | 2  | 6  | 6 | ERNESTO | 29.1 | 65.1 | 55  | 997  |
| 1982 | 10 | 2  | 12 | 6 | ERNESTO | 29.8 | 63.0 | 50  | 998  |
| 1982 | 10 | 2  | 18 | 6 | ERNESTO | 30.5 | 60.5 | 45  | 1001 |
| 1982 | 10 | 3  | 0  | 6 | ERNESTO | 32.0 | 58.0 | 40  | 1003 |
| 1983 | 8  | 15 | 12 | 1 | ALICIA  | 27.3 | 90.5 | 30  | 1009 |
| 1983 | 8  | 15 | 18 | 1 | ALICIA  | 27.2 | 91.0 | 40  | 1006 |
| 1983 | 8  | 16 | 0  | 1 | ALICIA  | 27.1 | 91.5 | 45  | 1005 |
| 1983 | 8  | 16 | 6  | 1 | ALICIA  | 27.0 | 92.0 | 50  | 1004 |
| 1983 | 8  | 16 | 12 | 1 | ALICIA  | 27.1 | 92.4 | 55  | 1002 |
| 1983 | 8  | 16 | 18 | 1 | ALICIA  | 27.3 | 92.8 | 60  | 998  |
| 1983 | 8  | 17 | 0  | 1 | ALICIA  | 27.4 | 93.3 | 65  | 991  |
| 1983 | 8  | 17 | 6  | 1 | ALICIA  | 27.7 | 93.7 | 70  | 987  |
| 1983 | 8  | 17 | 12 | 1 | ALICIA  | 27.9 | 94.2 | 75  | 983  |
| 1983 | 8  | 17 | 18 | 1 | ALICIA  | 28.1 | 94.5 | 90  | 974  |
| 1983 | 8  | 18 | 0  | 1 | ALICIA  | 28.4 | 94.8 | 95  | 969  |
| 1983 | 8  | 18 | 6  | 1 | ALICIA  | 28.9 | 95.0 | 100 | 963  |
| 1983 | 8  | 18 | 12 | 1 | ALICIA  | 29.7 | 95.5 | 80  | 965  |
| 1983 | 8  | 18 | 18 | 1 | ALICIA  | 30.5 | 96.0 | 40  | 990  |
| 1983 | 8  | 19 | 0  | 1 | ALICIA  | 31.5 | 96.7 | 35  | 998  |
| 1983 | 8  | 19 | 6  | 1 | ALICIA  | 32.4 | 97.4 | 30  | 1003 |
| 1983 | 8  | 19 | 12 | 1 | ALICIA  | 33.3 | 98.0 | 25  | 1006 |

|      |         |           |      |       |         |
|------|---------|-----------|------|-------|---------|
| 1983 | 8 19 18 | 1 ALICIA  | 34.4 | 98.5  | 25 1009 |
| 1983 | 8 20 0  | 1 ALICIA  | 35.4 | 99.0  | 20 1010 |
| 1983 | 8 20 6  | 1 ALICIA  | 36.5 | 99.4  | 20 1011 |
| 1983 | 8 20 12 | 1 ALICIA  | 37.6 | 99.2  | 20 1011 |
| 1983 | 8 20 18 | 1 ALICIA  | 38.9 | 99.0  | 20 1011 |
| 1983 | 8 21 0  | 1 ALICIA  | 40.0 | 98.0  | 20 1010 |
| 1983 | 8 21 6  | 1 ALICIA  | 41.2 | 97.0  | 20 1010 |
| 1983 | 8 23 18 | 2 BARRY   | 26.0 | 76.0  | 25 1012 |
| 1983 | 8 24 0  | 2 BARRY   | 26.8 | 76.2  | 30 1011 |
| 1983 | 8 24 6  | 2 BARRY   | 27.4 | 76.3  | 40 1010 |
| 1983 | 8 24 12 | 2 BARRY   | 28.1 | 76.8  | 50 1011 |
| 1983 | 8 24 18 | 2 BARRY   | 28.1 | 77.6  | 50 1011 |
| 1983 | 8 25 0  | 2 BARRY   | 28.1 | 78.9  | 45 1011 |
| 1983 | 8 25 6  | 2 BARRY   | 28.0 | 79.8  | 40 1012 |
| 1983 | 8 25 12 | 2 BARRY   | 27.9 | 80.8  | 30 1013 |
| 1983 | 8 25 18 | 2 BARRY   | 27.5 | 82.0  | 25 1014 |
| 1983 | 8 26 0  | 2 BARRY   | 27.0 | 83.8  | 20 1013 |
| 1983 | 8 26 6  | 2 BARRY   | 26.3 | 85.0  | 25 1013 |
| 1983 | 8 26 12 | 2 BARRY   | 25.7 | 86.3  | 30 1012 |
| 1983 | 8 26 18 | 2 BARRY   | 25.2 | 87.6  | 30 1011 |
| 1983 | 8 27 0  | 2 BARRY   | 25.1 | 88.9  | 30 1010 |
| 1983 | 8 27 6  | 2 BARRY   | 25.2 | 90.2  | 30 1009 |
| 1983 | 8 27 12 | 2 BARRY   | 25.8 | 91.6  | 35 1008 |
| 1983 | 8 27 18 | 2 BARRY   | 25.8 | 93.0  | 45 1002 |
| 1983 | 8 28 0  | 2 BARRY   | 25.7 | 94.5  | 60 999  |
| 1983 | 8 28 6  | 2 BARRY   | 25.5 | 95.5  | 60 998  |
| 1983 | 8 28 12 | 2 BARRY   | 25.5 | 96.4  | 65 993  |
| 1983 | 8 28 18 | 2 BARRY   | 25.4 | 97.5  | 70 986  |
| 1983 | 8 29 0  | 2 BARRY   | 25.5 | 98.5  | 40 995  |
| 1983 | 8 29 6  | 2 BARRY   | 25.5 | 99.5  | 30 1005 |
| 1983 | 8 29 12 | 2 BARRY   | 25.5 | 100.5 | 25 1010 |
| 1983 | 9 10 12 | 3 CHANTAL | 30.2 | 64.4  | 25 1010 |
| 1983 | 9 10 18 | 3 CHANTAL | 30.9 | 64.0  | 30 1008 |
| 1983 | 9 11 0  | 3 CHANTAL | 31.6 | 63.3  | 35 1005 |
| 1983 | 9 11 6  | 3 CHANTAL | 32.0 | 62.4  | 45 1000 |
| 1983 | 9 11 12 | 3 CHANTAL | 32.4 | 61.2  | 55 996  |
| 1983 | 9 11 18 | 3 CHANTAL | 32.8 | 60.0  | 65 994  |
| 1983 | 9 12 0  | 3 CHANTAL | 33.1 | 58.9  | 65 994  |
| 1983 | 9 12 6  | 3 CHANTAL | 33.6 | 57.6  | 65 994  |
| 1983 | 9 12 12 | 3 CHANTAL | 34.0 | 56.3  | 65 994  |
| 1983 | 9 12 18 | 3 CHANTAL | 34.4 | 55.5  | 65 994  |
| 1983 | 9 13 0  | 3 CHANTAL | 34.8 | 54.9  | 55 1000 |
| 1983 | 9 13 6  | 3 CHANTAL | 35.3 | 54.5  | 55 1000 |
| 1983 | 9 13 12 | 3 CHANTAL | 35.9 | 54.2  | 45 1005 |

|      |         |   |           |      |      |         |
|------|---------|---|-----------|------|------|---------|
| 1983 | 9 13 18 | 3 | CHANTAL   | 36.3 | 53.9 | 40 1005 |
| 1983 | 9 14 0  | 3 | CHANTAL   | 36.8 | 53.8 | 40 1005 |
| 1983 | 9 14 6  | 3 | CHANTAL   | 37.4 | 53.8 | 40 1006 |
| 1983 | 9 14 12 | 3 | CHANTAL   | 38.7 | 53.8 | 35 1008 |
| 1983 | 9 14 18 | 3 | CHANTAL   | 39.5 | 52.5 | 35 1008 |
| 1983 | 9 15 0  | 3 | CHANTAL   | 40.4 | 50.7 | 30 1009 |
| 1983 | 9 15 6  | 3 | CHANTAL   | 41.7 | 48.8 | 30 1009 |
| 1983 | 9 26 18 | 4 | DEAN      | 28.0 | 73.0 | 35 1010 |
| 1983 | 9 27 0  | 4 | DEAN      | 28.5 | 72.9 | 35 1009 |
| 1983 | 9 27 6  | 4 | DEAN      | 29.0 | 72.8 | 40 1006 |
| 1983 | 9 27 12 | 4 | DEAN      | 29.5 | 72.6 | 40 1003 |
| 1983 | 9 27 18 | 4 | DEAN      | 30.3 | 72.1 | 40 1000 |
| 1983 | 9 28 0  | 4 | DEAN      | 31.2 | 71.7 | 45 999  |
| 1983 | 9 28 6  | 4 | DEAN      | 32.2 | 71.1 | 45 999  |
| 1983 | 9 28 12 | 4 | DEAN      | 33.1 | 70.7 | 50 1000 |
| 1983 | 9 28 18 | 4 | DEAN      | 34.0 | 70.7 | 50 1001 |
| 1983 | 9 29 0  | 4 | DEAN      | 34.5 | 70.8 | 55 1003 |
| 1983 | 9 29 6  | 4 | DEAN      | 34.8 | 71.0 | 55 1005 |
| 1983 | 9 29 12 | 4 | DEAN      | 35.1 | 71.5 | 55 1006 |
| 1983 | 9 29 18 | 4 | DEAN      | 35.8 | 73.0 | 55 1007 |
| 1983 | 9 30 0  | 4 | DEAN      | 36.4 | 74.0 | 55 1008 |
| 1983 | 9 30 6  | 4 | DEAN      | 37.0 | 74.9 | 55 1009 |
| 1983 | 9 30 12 | 4 | DEAN      | 37.5 | 75.8 | 40 1010 |
| 1983 | 9 30 18 | 4 | DEAN      | 37.9 | 76.9 | 30 1015 |
| 1984 | 8 18 6  | 1 | SUBTROP 1 | 33.0 | 65.0 | 25 1005 |
| 1984 | 8 18 12 | 1 | SUBTROP 1 | 33.9 | 63.1 | 25 1004 |
| 1984 | 8 18 18 | 1 | SUBTROP 1 | 34.7 | 61.3 | 30 1003 |
| 1984 | 8 19 0  | 1 | SUBTROP 1 | 35.5 | 59.5 | 30 1002 |
| 1984 | 8 19 6  | 1 | SUBTROP 1 | 36.5 | 58.0 | 30 1001 |
| 1984 | 8 19 12 | 1 | SUBTROP 1 | 38.0 | 56.4 | 35 1000 |
| 1984 | 8 19 18 | 1 | SUBTROP 1 | 39.6 | 54.8 | 35 1000 |
| 1984 | 8 20 0  | 1 | SUBTROP 1 | 41.2 | 53.2 | 40 1000 |
| 1984 | 8 20 6  | 1 | SUBTROP 1 | 42.5 | 50.8 | 45 1000 |
| 1984 | 8 20 12 | 1 | SUBTROP 1 | 43.7 | 48.3 | 50 1001 |
| 1984 | 8 20 18 | 1 | SUBTROP 1 | 45.1 | 46.0 | 50 1002 |
| 1984 | 8 21 0  | 1 | SUBTROP 1 | 46.8 | 44.0 | 45 1004 |
| 1984 | 8 21 6  | 1 | SUBTROP 1 | 47.9 | 41.1 | 40 1006 |
| 1984 | 8 21 12 | 1 | SUBTROP 1 | 48.5 | 38.0 | 30 1008 |
| 1984 | 8 28 18 | 2 | ARTHUR    | 10.5 | 51.0 | 25 1010 |
| 1984 | 8 29 0  | 2 | ARTHUR    | 10.5 | 52.5 | 25 1009 |
| 1984 | 8 29 6  | 2 | ARTHUR    | 10.6 | 54.0 | 25 1008 |
| 1984 | 8 29 12 | 2 | ARTHUR    | 11.2 | 55.0 | 35 1006 |
| 1984 | 8 29 18 | 2 | ARTHUR    | 11.8 | 55.8 | 45 1004 |
| 1984 | 8 30 0  | 2 | ARTHUR    | 12.4 | 56.3 | 45 1004 |

|      |   |    |    |   |        |      |      |    |      |
|------|---|----|----|---|--------|------|------|----|------|
| 1984 | 8 | 30 | 6  | 2 | ARTHUR | 13.0 | 57.0 | 40 | 1005 |
| 1984 | 8 | 30 | 12 | 2 | ARTHUR | 13.4 | 57.4 | 35 | 1006 |
| 1984 | 8 | 30 | 18 | 2 | ARTHUR | 14.0 | 57.8 | 35 | 1007 |
| 1984 | 8 | 31 | 0  | 2 | ARTHUR | 14.4 | 58.0 | 35 | 1009 |
| 1984 | 8 | 31 | 6  | 2 | ARTHUR | 14.8 | 58.1 | 35 | 1009 |
| 1984 | 8 | 31 | 12 | 2 | ARTHUR | 15.3 | 58.2 | 35 | 1010 |
| 1984 | 8 | 31 | 18 | 2 | ARTHUR | 16.0 | 58.4 | 30 | 1011 |
| 1984 | 9 | 1  | 0  | 2 | ARTHUR | 16.7 | 58.6 | 30 | 1011 |
| 1984 | 9 | 1  | 6  | 2 | ARTHUR | 16.9 | 59.1 | 30 | 1012 |
| 1984 | 9 | 1  | 12 | 2 | ARTHUR | 17.0 | 59.8 | 30 | 1011 |
| 1984 | 9 | 1  | 18 | 2 | ARTHUR | 17.2 | 60.2 | 25 | 1010 |
| 1984 | 9 | 2  | 0  | 2 | ARTHUR | 17.6 | 60.6 | 25 | 1010 |
| 1984 | 9 | 2  | 6  | 2 | ARTHUR | 17.9 | 61.0 | 25 | 1010 |
| 1984 | 9 | 2  | 12 | 2 | ARTHUR | 18.2 | 61.2 | 25 | 1010 |
| 1984 | 9 | 2  | 18 | 2 | ARTHUR | 18.7 | 61.4 | 30 | 1009 |
| 1984 | 9 | 3  | 0  | 2 | ARTHUR | 18.9 | 61.8 | 30 | 1008 |
| 1984 | 9 | 3  | 6  | 2 | ARTHUR | 19.2 | 62.0 | 30 | 1008 |
| 1984 | 9 | 3  | 12 | 2 | ARTHUR | 19.5 | 62.2 | 30 | 1010 |
| 1984 | 9 | 3  | 18 | 2 | ARTHUR | 19.8 | 62.6 | 30 | 1011 |
| 1984 | 9 | 4  | 0  | 2 | ARTHUR | 20.2 | 62.9 | 25 | 1012 |
| 1984 | 9 | 4  | 6  | 2 | ARTHUR | 21.0 | 63.3 | 25 | 1012 |
| 1984 | 9 | 4  | 12 | 2 | ARTHUR | 21.8 | 64.0 | 25 | 1013 |
| 1984 | 9 | 4  | 18 | 2 | ARTHUR | 22.3 | 65.0 | 25 | 1013 |
| 1984 | 9 | 5  | 0  | 2 | ARTHUR | 22.8 | 66.0 | 25 | 1014 |
| 1984 | 9 | 5  | 6  | 2 | ARTHUR | 23.1 | 66.9 | 25 | 1014 |
| 1984 | 9 | 5  | 12 | 2 | ARTHUR | 24.0 | 67.9 | 25 | 1014 |
| 1984 | 9 | 5  | 18 | 2 | ARTHUR | 25.0 | 68.5 | 25 | 1014 |
| 1984 | 8 | 30 | 12 | 3 | BERTHA | 13.1 | 41.0 | 25 | 1009 |
| 1984 | 8 | 30 | 18 | 3 | BERTHA | 13.3 | 42.2 | 25 | 1009 |
| 1984 | 8 | 31 | 0  | 3 | BERTHA | 13.7 | 43.4 | 30 | 1008 |
| 1984 | 8 | 31 | 6  | 3 | BERTHA | 14.4 | 44.5 | 30 | 1008 |
| 1984 | 8 | 31 | 12 | 3 | BERTHA | 14.9 | 45.3 | 35 | 1007 |
| 1984 | 8 | 31 | 18 | 3 | BERTHA | 15.7 | 46.6 | 35 | 1007 |
| 1984 | 9 | 1  | 0  | 3 | BERTHA | 16.3 | 47.7 | 35 | 1007 |
| 1984 | 9 | 1  | 6  | 3 | BERTHA | 17.0 | 48.7 | 35 | 1007 |
| 1984 | 9 | 1  | 12 | 3 | BERTHA | 17.5 | 49.5 | 30 | 1008 |
| 1984 | 9 | 1  | 18 | 3 | BERTHA | 18.2 | 50.5 | 30 | 1008 |
| 1984 | 9 | 2  | 0  | 3 | BERTHA | 19.2 | 51.3 | 30 | 1008 |
| 1984 | 9 | 2  | 6  | 3 | BERTHA | 20.0 | 52.1 | 30 | 1009 |
| 1984 | 9 | 2  | 12 | 3 | BERTHA | 20.8 | 53.1 | 25 | 1010 |
| 1984 | 9 | 2  | 18 | 3 | BERTHA | 22.6 | 52.8 | 25 | 1010 |
| 1984 | 9 | 3  | 0  | 3 | BERTHA | 23.8 | 52.5 | 25 | 1010 |
| 1984 | 9 | 3  | 6  | 3 | BERTHA | 25.1 | 51.9 | 25 | 1010 |
| 1984 | 9 | 3  | 12 | 3 | BERTHA | 26.1 | 50.5 | 20 | 1012 |

|      |   |    |    |   |        |      |      |     |      |
|------|---|----|----|---|--------|------|------|-----|------|
| 1984 | 9 | 3  | 18 | 3 | BERTHA | 27.1 | 49.1 | 20  | 1012 |
| 1984 | 9 | 4  | 0  | 3 | BERTHA | 28.3 | 47.8 | 20  | 1013 |
| 1984 | 9 | 4  | 6  | 3 | BERTHA | 29.6 | 46.0 | 20  | 1013 |
| 1984 | 9 | 4  | 12 | 3 | BERTHA | 30.5 | 44.5 | 20  | 1013 |
| 1984 | 9 | 4  | 18 | 3 | BERTHA | 32.0 | 42.0 | 20  | 1013 |
| 1984 | 8 | 31 | 0  | 4 | CESAR  | 36.6 | 66.9 | 25  | 1008 |
| 1984 | 8 | 31 | 6  | 4 | CESAR  | 37.8 | 66.0 | 30  | 1005 |
| 1984 | 8 | 31 | 12 | 4 | CESAR  | 38.9 | 65.0 | 35  | 1001 |
| 1984 | 8 | 31 | 18 | 4 | CESAR  | 39.8 | 63.1 | 35  | 999  |
| 1984 | 9 | 1  | 0  | 4 | CESAR  | 40.6 | 61.1 | 40  | 999  |
| 1984 | 9 | 1  | 6  | 4 | CESAR  | 41.7 | 59.0 | 40  | 998  |
| 1984 | 9 | 1  | 12 | 4 | CESAR  | 42.9 | 56.9 | 40  | 998  |
| 1984 | 9 | 1  | 18 | 4 | CESAR  | 44.0 | 54.9 | 40  | 998  |
| 1984 | 9 | 2  | 0  | 4 | CESAR  | 44.9 | 53.3 | 45  | 998  |
| 1984 | 9 | 2  | 6  | 4 | CESAR  | 45.5 | 51.8 | 45  | 997  |
| 1984 | 9 | 2  | 12 | 4 | CESAR  | 46.0 | 50.4 | 50  | 994  |
| 1984 | 9 | 2  | 18 | 4 | CESAR  | 46.2 | 48.9 | 50  | 989  |
| 1984 | 9 | 8  | 12 | 5 | DIANA  | 28.5 | 77.4 | 35  | 1008 |
| 1984 | 9 | 8  | 18 | 5 | DIANA  | 28.6 | 78.3 | 40  | 1006 |
| 1984 | 9 | 9  | 0  | 5 | DIANA  | 28.5 | 79.2 | 45  | 1004 |
| 1984 | 9 | 9  | 6  | 5 | DIANA  | 28.6 | 79.7 | 50  | 1002 |
| 1984 | 9 | 9  | 12 | 5 | DIANA  | 29.0 | 79.9 | 55  | 1000 |
| 1984 | 9 | 9  | 18 | 5 | DIANA  | 29.4 | 80.1 | 60  | 995  |
| 1984 | 9 | 10 | 0  | 5 | DIANA  | 29.7 | 80.4 | 60  | 994  |
| 1984 | 9 | 10 | 6  | 5 | DIANA  | 30.1 | 80.3 | 60  | 995  |
| 1984 | 9 | 10 | 12 | 5 | DIANA  | 30.5 | 80.0 | 65  | 991  |
| 1984 | 9 | 10 | 18 | 5 | DIANA  | 30.8 | 79.6 | 70  | 986  |
| 1984 | 9 | 11 | 0  | 5 | DIANA  | 31.3 | 79.1 | 80  | 980  |
| 1984 | 9 | 11 | 6  | 5 | DIANA  | 31.8 | 78.7 | 85  | 973  |
| 1984 | 9 | 11 | 12 | 5 | DIANA  | 32.6 | 78.4 | 100 | 960  |
| 1984 | 9 | 11 | 18 | 5 | DIANA  | 33.4 | 78.0 | 110 | 952  |
| 1984 | 9 | 12 | 0  | 5 | DIANA  | 33.9 | 77.7 | 115 | 949  |
| 1984 | 9 | 12 | 6  | 5 | DIANA  | 34.0 | 77.4 | 95  | 963  |
| 1984 | 9 | 12 | 12 | 5 | DIANA  | 34.0 | 77.2 | 95  | 967  |
| 1984 | 9 | 12 | 18 | 5 | DIANA  | 33.9 | 77.1 | 90  | 970  |
| 1984 | 9 | 13 | 0  | 5 | DIANA  | 33.8 | 77.4 | 85  | 972  |
| 1984 | 9 | 13 | 6  | 5 | DIANA  | 33.9 | 77.9 | 80  | 978  |
| 1984 | 9 | 13 | 12 | 5 | DIANA  | 34.0 | 78.3 | 65  | 990  |
| 1984 | 9 | 13 | 18 | 5 | DIANA  | 34.3 | 78.5 | 55  | 999  |
| 1984 | 9 | 14 | 0  | 5 | DIANA  | 34.6 | 78.5 | 45  | 1003 |
| 1984 | 9 | 14 | 6  | 5 | DIANA  | 35.0 | 78.0 | 40  | 1005 |
| 1984 | 9 | 14 | 12 | 5 | DIANA  | 35.3 | 77.1 | 45  | 1003 |
| 1984 | 9 | 14 | 18 | 5 | DIANA  | 35.6 | 76.0 | 50  | 1000 |
| 1984 | 9 | 15 | 0  | 5 | DIANA  | 36.2 | 74.4 | 55  | 997  |



|      |      |    |           |      |      |    |      |
|------|------|----|-----------|------|------|----|------|
| 1984 | 9 15 | 6  | 5 DIANA   | 37.2 | 72.7 | 60 | 994  |
| 1984 | 9 15 | 12 | 5 DIANA   | 38.5 | 70.3 | 60 | 992  |
| 1984 | 9 15 | 18 | 5 DIANA   | 41.0 | 66.0 | 60 | 992  |
| 1984 | 9 16 | 0  | 5 DIANA   | 43.5 | 61.9 | 60 | 994  |
| 1984 | 9 16 | 6  | 5 DIANA   | 46.0 | 57.8 | 60 | 995  |
| 1984 | 9 14 | 0  | 6 EDOUARD | 20.3 | 96.1 | 30 | 1000 |
| 1984 | 9 14 | 6  | 6 EDOUARD | 20.5 | 96.2 | 35 | 1000 |
| 1984 | 9 14 | 12 | 6 EDOUARD | 20.7 | 96.1 | 40 | 1000 |
| 1984 | 9 14 | 18 | 6 EDOUARD | 20.5 | 96.0 | 45 | 1001 |
| 1984 | 9 15 | 0  | 6 EDOUARD | 20.3 | 95.8 | 55 | 998  |
| 1984 | 9 15 | 6  | 6 EDOUARD | 20.0 | 95.7 | 25 | 1002 |
| 1984 | 9 15 | 12 | 6 EDOUARD | 20.0 | 95.7 | 25 | 1001 |
| 1984 | 9 15 | 12 | 7 FRAN    | 13.7 | 21.3 | 25 | 1010 |
| 1984 | 9 15 | 18 | 7 FRAN    | 13.8 | 22.0 | 25 | 1010 |
| 1984 | 9 16 | 0  | 7 FRAN    | 13.9 | 22.7 | 30 | 1010 |
| 1984 | 9 16 | 6  | 7 FRAN    | 14.0 | 23.4 | 30 | 1009 |
| 1984 | 9 16 | 12 | 7 FRAN    | 14.3 | 24.1 | 30 | 1008 |
| 1984 | 9 16 | 18 | 7 FRAN    | 14.8 | 24.8 | 35 | 1006 |
| 1984 | 9 17 | 0  | 7 FRAN    | 15.3 | 25.3 | 45 | 1000 |
| 1984 | 9 17 | 6  | 7 FRAN    | 16.3 | 26.0 | 50 | 998  |
| 1984 | 9 17 | 12 | 7 FRAN    | 17.3 | 26.5 | 50 | 996  |
| 1984 | 9 17 | 18 | 7 FRAN    | 18.4 | 27.1 | 55 | 995  |
| 1984 | 9 18 | 0  | 7 FRAN    | 19.5 | 28.0 | 55 | 994  |
| 1984 | 9 18 | 6  | 7 FRAN    | 20.2 | 29.6 | 55 | 994  |
| 1984 | 9 18 | 12 | 7 FRAN    | 20.9 | 31.0 | 55 | 994  |
| 1984 | 9 18 | 18 | 7 FRAN    | 21.1 | 32.8 | 50 | 995  |
| 1984 | 9 19 | 0  | 7 FRAN    | 21.1 | 34.3 | 50 | 996  |
| 1984 | 9 19 | 6  | 7 FRAN    | 21.0 | 36.0 | 50 | 1000 |
| 1984 | 9 19 | 12 | 7 FRAN    | 20.9 | 37.9 | 45 | 1005 |
| 1984 | 9 19 | 18 | 7 FRAN    | 20.8 | 39.5 | 40 | 1005 |
| 1984 | 9 20 | 0  | 7 FRAN    | 20.5 | 40.7 | 35 | 1006 |
| 1984 | 9 20 | 6  | 7 FRAN    | 20.2 | 42.0 | 30 | 1008 |
| 1984 | 9 20 | 12 | 7 FRAN    | 20.0 | 43.0 | 25 | 1009 |
| 1984 | 9 16 | 18 | 8 GUSTAV  | 28.6 | 65.5 | 30 | 1009 |
| 1984 | 9 17 | 0  | 8 GUSTAV  | 29.6 | 65.5 | 30 | 1009 |
| 1984 | 9 17 | 6  | 8 GUSTAV  | 30.3 | 65.5 | 30 | 1009 |
| 1984 | 9 17 | 12 | 8 GUSTAV  | 31.3 | 65.2 | 30 | 1009 |
| 1984 | 9 17 | 18 | 8 GUSTAV  | 32.1 | 64.7 | 30 | 1009 |
| 1984 | 9 18 | 0  | 8 GUSTAV  | 32.1 | 64.7 | 30 | 1009 |
| 1984 | 9 18 | 6  | 8 GUSTAV  | 32.1 | 64.7 | 30 | 1009 |
| 1984 | 9 18 | 12 | 8 GUSTAV  | 32.1 | 64.7 | 30 | 1009 |
| 1984 | 9 18 | 18 | 8 GUSTAV  | 32.1 | 64.7 | 45 | 1006 |
| 1984 | 9 19 | 0  | 8 GUSTAV  | 33.2 | 63.6 | 45 | 1006 |
| 1984 | 9 19 | 6  | 8 GUSTAV  | 34.6 | 62.6 | 45 | 1006 |

|      |    |    |    |    |          |      |      |    |      |
|------|----|----|----|----|----------|------|------|----|------|
| 1984 | 9  | 23 | 0  | 9  | HORTENSE | 31.3 | 58.3 | 30 | 1009 |
| 1984 | 9  | 23 | 6  | 9  | HORTENSE | 30.7 | 58.7 | 30 | 1007 |
| 1984 | 9  | 23 | 12 | 9  | HORTENSE | 30.0 | 59.0 | 30 | 1005 |
| 1984 | 9  | 23 | 18 | 9  | HORTENSE | 29.2 | 59.1 | 35 | 1002 |
| 1984 | 9  | 24 | 0  | 9  | HORTENSE | 28.6 | 59.2 | 35 | 1000 |
| 1984 | 9  | 24 | 6  | 9  | HORTENSE | 28.4 | 59.4 | 35 | 999  |
| 1984 | 9  | 24 | 12 | 9  | HORTENSE | 28.4 | 59.8 | 40 | 999  |
| 1984 | 9  | 24 | 18 | 9  | HORTENSE | 28.5 | 60.1 | 40 | 999  |
| 1984 | 9  | 25 | 0  | 9  | HORTENSE | 28.7 | 60.3 | 45 | 999  |
| 1984 | 9  | 25 | 6  | 9  | HORTENSE | 28.9 | 60.4 | 55 | 998  |
| 1984 | 9  | 25 | 12 | 9  | HORTENSE | 29.3 | 60.6 | 60 | 997  |
| 1984 | 9  | 25 | 18 | 9  | HORTENSE | 29.7 | 60.8 | 65 | 996  |
| 1984 | 9  | 26 | 0  | 9  | HORTENSE | 30.2 | 61.1 | 65 | 993  |
| 1984 | 9  | 26 | 6  | 9  | HORTENSE | 30.8 | 61.0 | 60 | 994  |
| 1984 | 9  | 26 | 12 | 9  | HORTENSE | 31.3 | 60.7 | 50 | 995  |
| 1984 | 9  | 26 | 18 | 9  | HORTENSE | 32.0 | 60.9 | 45 | 996  |
| 1984 | 9  | 27 | 0  | 9  | HORTENSE | 32.4 | 60.8 | 40 | 996  |
| 1984 | 9  | 27 | 6  | 9  | HORTENSE | 32.8 | 60.5 | 40 | 995  |
| 1984 | 9  | 27 | 12 | 9  | HORTENSE | 33.0 | 60.0 | 35 | 995  |
| 1984 | 9  | 27 | 18 | 9  | HORTENSE | 32.9 | 59.8 | 35 | 995  |
| 1984 | 9  | 28 | 0  | 9  | HORTENSE | 32.7 | 59.9 | 35 | 995  |
| 1984 | 9  | 28 | 6  | 9  | HORTENSE | 32.3 | 60.2 | 35 | 996  |
| 1984 | 9  | 28 | 12 | 9  | HORTENSE | 31.7 | 61.0 | 40 | 996  |
| 1984 | 9  | 28 | 18 | 9  | HORTENSE | 31.1 | 61.7 | 40 | 997  |
| 1984 | 9  | 29 | 0  | 9  | HORTENSE | 30.6 | 62.4 | 45 | 998  |
| 1984 | 9  | 29 | 6  | 9  | HORTENSE | 30.5 | 63.2 | 45 | 999  |
| 1984 | 9  | 29 | 12 | 9  | HORTENSE | 30.6 | 64.0 | 45 | 1001 |
| 1984 | 9  | 29 | 18 | 9  | HORTENSE | 30.9 | 64.7 | 40 | 1002 |
| 1984 | 9  | 30 | 0  | 9  | HORTENSE | 31.4 | 65.0 | 40 | 1004 |
| 1984 | 9  | 30 | 6  | 9  | HORTENSE | 32.3 | 64.9 | 35 | 1006 |
| 1984 | 9  | 30 | 12 | 9  | HORTENSE | 33.9 | 64.2 | 35 | 1007 |
| 1984 | 9  | 30 | 18 | 9  | HORTENSE | 35.8 | 62.2 | 35 | 1006 |
| 1984 | 10 | 1  | 0  | 9  | HORTENSE | 37.4 | 59.8 | 40 | 1004 |
| 1984 | 10 | 1  | 6  | 9  | HORTENSE | 38.8 | 57.0 | 45 | 1001 |
| 1984 | 10 | 1  | 12 | 9  | HORTENSE | 40.0 | 54.0 | 50 | 998  |
| 1984 | 10 | 1  | 18 | 9  | HORTENSE | 40.9 | 50.4 | 50 | 996  |
| 1984 | 10 | 2  | 0  | 9  | HORTENSE | 41.7 | 46.8 | 50 | 995  |
| 1984 | 10 | 2  | 6  | 9  | HORTENSE | 42.3 | 43.0 | 50 | 995  |
| 1984 | 10 | 2  | 12 | 9  | HORTENSE | 42.8 | 39.0 | 50 | 995  |
| 1984 | 10 | 2  | 18 | 9  | HORTENSE | 43.2 | 35.0 | 45 | 996  |
| 1984 | 9  | 25 | 12 | 10 | ISIDORE  | 23.4 | 73.0 | 30 | 1003 |
| 1984 | 9  | 25 | 18 | 10 | ISIDORE  | 23.9 | 73.9 | 30 | 1003 |
| 1984 | 9  | 26 | 0  | 10 | ISIDORE  | 24.3 | 74.9 | 30 | 1002 |
| 1984 | 9  | 26 | 6  | 10 | ISIDORE  | 24.5 | 76.0 | 30 | 1002 |

|      |    |    |    |    |           |      |      |    |      |
|------|----|----|----|----|-----------|------|------|----|------|
| 1984 | 9  | 26 | 12 | 10 | ISIDORE   | 24.7 | 77.0 | 40 | 1001 |
| 1984 | 9  | 26 | 18 | 10 | ISIDORE   | 25.0 | 77.7 | 45 | 1000 |
| 1984 | 9  | 27 | 0  | 10 | ISIDORE   | 25.4 | 78.4 | 45 | 999  |
| 1984 | 9  | 27 | 6  | 10 | ISIDORE   | 25.8 | 79.1 | 50 | 1000 |
| 1984 | 9  | 27 | 12 | 10 | ISIDORE   | 26.4 | 79.8 | 50 | 1000 |
| 1984 | 9  | 27 | 18 | 10 | ISIDORE   | 27.3 | 80.5 | 45 | 1001 |
| 1984 | 9  | 28 | 0  | 10 | ISIDORE   | 27.8 | 81.5 | 45 | 1002 |
| 1984 | 9  | 28 | 6  | 10 | ISIDORE   | 28.5 | 82.3 | 45 | 1002 |
| 1984 | 9  | 28 | 12 | 10 | ISIDORE   | 29.5 | 82.1 | 45 | 1002 |
| 1984 | 9  | 28 | 18 | 10 | ISIDORE   | 30.1 | 81.9 | 45 | 1001 |
| 1984 | 9  | 29 | 0  | 10 | ISIDORE   | 30.7 | 81.4 | 45 | 1004 |
| 1984 | 9  | 29 | 6  | 10 | ISIDORE   | 31.3 | 80.5 | 45 | 1005 |
| 1984 | 9  | 29 | 12 | 10 | ISIDORE   | 32.2 | 79.3 | 45 | 1004 |
| 1984 | 9  | 29 | 18 | 10 | ISIDORE   | 32.8 | 77.8 | 45 | 1002 |
| 1984 | 9  | 30 | 0  | 10 | ISIDORE   | 33.6 | 76.2 | 50 | 1000 |
| 1984 | 9  | 30 | 6  | 10 | ISIDORE   | 34.3 | 74.4 | 40 | 1005 |
| 1984 | 9  | 30 | 12 | 10 | ISIDORE   | 34.8 | 72.5 | 40 | 1007 |
| 1984 | 9  | 30 | 18 | 10 | ISIDORE   | 35.3 | 70.4 | 40 | 1007 |
| 1984 | 10 | 1  | 0  | 10 | ISIDORE   | 35.8 | 67.7 | 30 | 1007 |
| 1984 | 10 | 1  | 6  | 10 | ISIDORE   | 36.4 | 65.0 | 30 | 1008 |
| 1984 | 10 | 1  | 12 | 10 | ISIDORE   | 36.8 | 62.1 | 25 | 1012 |
| 1984 | 10 | 7  | 6  | 11 | JOSEPHINE | 24.1 | 68.9 | 25 | 1010 |
| 1984 | 10 | 7  | 12 | 11 | JOSEPHINE | 24.0 | 69.4 | 25 | 1008 |
| 1984 | 10 | 7  | 18 | 11 | JOSEPHINE | 23.9 | 69.9 | 25 | 1008 |
| 1984 | 10 | 8  | 0  | 11 | JOSEPHINE | 23.9 | 70.4 | 30 | 1006 |
| 1984 | 10 | 8  | 6  | 11 | JOSEPHINE | 24.0 | 70.9 | 30 | 1004 |
| 1984 | 10 | 8  | 12 | 11 | JOSEPHINE | 24.1 | 71.4 | 40 | 1002 |
| 1984 | 10 | 8  | 18 | 11 | JOSEPHINE | 24.3 | 71.9 | 50 | 998  |
| 1984 | 10 | 9  | 0  | 11 | JOSEPHINE | 24.6 | 72.2 | 55 | 995  |
| 1984 | 10 | 9  | 6  | 11 | JOSEPHINE | 25.2 | 72.2 | 60 | 994  |
| 1984 | 10 | 9  | 12 | 11 | JOSEPHINE | 25.8 | 72.1 | 60 | 995  |
| 1984 | 10 | 9  | 18 | 11 | JOSEPHINE | 26.4 | 72.1 | 60 | 993  |
| 1984 | 10 | 10 | 0  | 11 | JOSEPHINE | 26.9 | 72.2 | 60 | 990  |
| 1984 | 10 | 10 | 6  | 11 | JOSEPHINE | 27.2 | 72.4 | 65 | 987  |
| 1984 | 10 | 10 | 12 | 11 | JOSEPHINE | 27.5 | 72.5 | 70 | 987  |
| 1984 | 10 | 10 | 18 | 11 | JOSEPHINE | 28.0 | 72.6 | 70 | 985  |
| 1984 | 10 | 11 | 0  | 11 | JOSEPHINE | 28.6 | 72.5 | 75 | 983  |
| 1984 | 10 | 11 | 6  | 11 | JOSEPHINE | 29.3 | 72.4 | 80 | 979  |
| 1984 | 10 | 11 | 12 | 11 | JOSEPHINE | 30.0 | 72.1 | 85 | 974  |
| 1984 | 10 | 11 | 18 | 11 | JOSEPHINE | 30.7 | 71.9 | 85 | 971  |
| 1984 | 10 | 12 | 0  | 11 | JOSEPHINE | 31.4 | 71.7 | 90 | 970  |
| 1984 | 10 | 12 | 6  | 11 | JOSEPHINE | 32.2 | 71.7 | 90 | 973  |
| 1984 | 10 | 12 | 12 | 11 | JOSEPHINE | 33.0 | 71.8 | 90 | 977  |
| 1984 | 10 | 12 | 18 | 11 | JOSEPHINE | 33.7 | 71.7 | 90 | 976  |

|            |         |           |      |      |    |      |
|------------|---------|-----------|------|------|----|------|
| 1984 10 13 | 0 11    | JOSEPHINE | 34.3 | 71.4 | 85 | 971  |
| 1984 10 13 | 6 11    | JOSEPHINE | 34.8 | 71.2 | 85 | 973  |
| 1984 10 13 | 12 11   | JOSEPHINE | 35.4 | 71.3 | 80 | 975  |
| 1984 10 13 | 18 11   | JOSEPHINE | 36.0 | 71.7 | 70 | 973  |
| 1984 10 14 | 0 11    | JOSEPHINE | 36.6 | 71.9 | 65 | 977  |
| 1984 10 14 | 6 11    | JOSEPHINE | 36.8 | 71.7 | 65 | 975  |
| 1984 10 14 | 12 11   | JOSEPHINE | 36.6 | 71.4 | 70 | 971  |
| 1984 10 14 | 18 11   | JOSEPHINE | 36.3 | 70.8 | 70 | 968  |
| 1984 10 15 | 0 11    | JOSEPHINE | 35.9 | 69.8 | 70 | 965  |
| 1984 10 15 | 6 11    | JOSEPHINE | 36.2 | 68.4 | 65 | 966  |
| 1984 10 15 | 12 11   | JOSEPHINE | 36.8 | 66.6 | 65 | 973  |
| 1984 10 15 | 18 11   | JOSEPHINE | 37.6 | 64.8 | 65 | 971  |
| 1984 10 16 | 0 11    | JOSEPHINE | 38.3 | 63.0 | 65 | 973  |
| 1984 10 16 | 6 11    | JOSEPHINE | 39.2 | 61.4 | 65 | 977  |
| 1984 10 16 | 12 11   | JOSEPHINE | 39.9 | 59.7 | 65 | 982  |
| 1984 10 16 | 18 11   | JOSEPHINE | 40.6 | 58.2 | 65 | 986  |
| 1984 10 17 | 0 11    | JOSEPHINE | 41.3 | 56.6 | 65 | 988  |
| 1984 10 17 | 6 11    | JOSEPHINE | 42.0 | 54.9 | 60 | 990  |
| 1984 10 17 | 12 11   | JOSEPHINE | 43.0 | 53.9 | 60 | 992  |
| 1984 10 17 | 18 11   | JOSEPHINE | 43.6 | 54.1 | 55 | 993  |
| 1984 10 18 | 0 11    | JOSEPHINE | 44.0 | 54.4 | 50 | 994  |
| 1984 10 18 | 6 11    | JOSEPHINE | 44.0 | 55.1 | 50 | 994  |
| 1984 10 18 | 12 11   | JOSEPHINE | 44.1 | 56.0 | 50 | 995  |
| 1984 10 18 | 18 11   | JOSEPHINE | 44.0 | 57.1 | 45 | 995  |
| 1984 10 19 | 0 11    | JOSEPHINE | 42.8 | 57.7 | 45 | 995  |
| 1984 10 19 | 6 11    | JOSEPHINE | 41.2 | 56.8 | 45 | 995  |
| 1984 10 19 | 12 11   | JOSEPHINE | 40.6 | 55.1 | 40 | 995  |
| 1984 10 19 | 18 11   | JOSEPHINE | 40.7 | 53.1 | 40 | 995  |
| 1984 10 20 | 0 11    | JOSEPHINE | 41.2 | 50.9 | 35 | 995  |
| 1984 10 20 | 6 11    | JOSEPHINE | 41.8 | 48.5 | 30 | 996  |
| 1984 10 20 | 12 11   | JOSEPHINE | 42.2 | 45.7 | 30 | 997  |
| 1984 10 20 | 18 11   | JOSEPHINE | 42.8 | 42.8 | 30 | 997  |
| 1984 10 21 | 0 11    | JOSEPHINE | 43.3 | 39.5 | 30 | 998  |
| 1984 11    | 5 18 12 | KLAUS     | 14.7 | 68.8 | 15 | 1004 |
| 1984 11    | 6 0 12  | KLAUS     | 15.2 | 68.1 | 15 | 1003 |
| 1984 11    | 6 6 12  | KLAUS     | 15.8 | 67.7 | 20 | 1003 |
| 1984 11    | 6 12 12 | KLAUS     | 16.4 | 67.1 | 25 | 1002 |
| 1984 11    | 6 18 12 | KLAUS     | 17.0 | 66.7 | 35 | 1001 |
| 1984 11    | 7 0 12  | KLAUS     | 17.4 | 66.2 | 40 | 1000 |
| 1984 11    | 7 6 12  | KLAUS     | 18.0 | 65.8 | 45 | 998  |
| 1984 11    | 7 12 12 | KLAUS     | 18.5 | 65.2 | 50 | 997  |
| 1984 11    | 7 18 12 | KLAUS     | 19.1 | 64.7 | 60 | 995  |
| 1984 11    | 8 0 12  | KLAUS     | 19.4 | 64.0 | 65 | 992  |
| 1984 11    | 8 6 12  | KLAUS     | 19.6 | 63.1 | 70 | 989  |

|                        |      |      |    |     |
|------------------------|------|------|----|-----|
| 1984 11 8 12 12 KLAUS  | 19.7 | 62.2 | 75 | 986 |
| 1984 11 8 18 12 KLAUS  | 19.9 | 61.4 | 80 | 984 |
| 1984 11 9 0 12 KLAUS   | 20.4 | 60.8 | 80 | 982 |
| 1984 11 9 6 12 KLAUS   | 21.1 | 60.1 | 80 | 981 |
| 1984 11 9 12 12 KLAUS  | 21.8 | 59.5 | 80 | 980 |
| 1984 11 9 18 12 KLAUS  | 22.7 | 58.7 | 80 | 980 |
| 1984 11 10 0 12 KLAUS  | 23.8 | 57.8 | 80 | 979 |
| 1984 11 10 6 12 KLAUS  | 24.8 | 56.6 | 75 | 978 |
| 1984 11 10 12 12 KLAUS | 26.2 | 55.2 | 75 | 977 |
| 1984 11 10 18 12 KLAUS | 28.0 | 54.0 | 75 | 975 |
| 1984 11 11 0 12 KLAUS  | 29.5 | 53.0 | 75 | 971 |
| 1984 11 11 6 12 KLAUS  | 31.0 | 52.5 | 70 | 975 |
| 1984 11 11 12 12 KLAUS | 32.2 | 52.4 | 70 | 977 |
| 1984 11 11 18 12 KLAUS | 33.4 | 52.7 | 70 | 980 |
| 1984 11 12 0 12 KLAUS  | 34.6 | 53.4 | 70 | 982 |
| 1984 11 12 6 12 KLAUS  | 34.8 | 54.2 | 70 | 983 |
| 1984 11 12 12 12 KLAUS | 35.0 | 55.0 | 65 | 984 |
| 1984 11 12 18 12 KLAUS | 35.5 | 54.2 | 60 | 985 |
| 1984 11 13 0 12 KLAUS  | 36.5 | 52.8 | 60 | 986 |
| 1984 11 13 6 12 KLAUS  | 38.0 | 51.0 | 55 | 987 |
| 1984 11 13 12 12 KLAUS | 40.0 | 49.0 | 55 | 988 |
| 1984 11 13 18 12 KLAUS | 42.0 | 47.0 | 50 | 989 |
| 1984 12 12 12 13 LILI  | 34.5 | 60.5 | 50 | 995 |
| 1984 12 12 18 13 LILI  | 35.5 | 60.0 | 50 | 995 |
| 1984 12 13 0 13 LILI   | 35.5 | 60.0 | 55 | 993 |
| 1984 12 13 6 13 LILI   | 35.5 | 60.0 | 55 | 994 |
| 1984 12 13 12 13 LILI  | 34.9 | 59.8 | 55 | 994 |
| 1984 12 13 18 13 LILI  | 33.8 | 59.5 | 55 | 994 |
| 1984 12 14 0 13 LILI   | 32.7 | 59.0 | 55 | 994 |
| 1984 12 14 6 13 LILI   | 32.0 | 58.0 | 55 | 994 |
| 1984 12 14 12 13 LILI  | 31.4 | 57.0 | 55 | 994 |
| 1984 12 14 18 13 LILI  | 30.5 | 56.2 | 55 | 994 |
| 1984 12 15 0 13 LILI   | 28.9 | 55.9 | 55 | 994 |
| 1984 12 15 6 13 LILI   | 27.2 | 55.8 | 55 | 994 |
| 1984 12 15 12 13 LILI  | 25.8 | 56.0 | 55 | 994 |
| 1984 12 15 18 13 LILI  | 24.5 | 56.3 | 55 | 994 |
| 1984 12 16 0 13 LILI   | 23.4 | 56.2 | 55 | 994 |
| 1984 12 16 6 13 LILI   | 22.4 | 55.4 | 55 | 994 |
| 1984 12 16 12 13 LILI  | 22.4 | 54.0 | 55 | 994 |
| 1984 12 16 18 13 LILI  | 23.2 | 52.7 | 55 | 994 |
| 1984 12 17 0 13 LILI   | 24.8 | 50.8 | 55 | 994 |
| 1984 12 17 6 13 LILI   | 28.0 | 49.6 | 55 | 994 |
| 1984 12 17 12 13 LILI  | 31.2 | 49.9 | 55 | 994 |
| 1984 12 17 18 13 LILI  | 33.0 | 51.0 | 55 | 994 |

|                       |      |      |    |      |
|-----------------------|------|------|----|------|
| 1984 12 18 0 13 LILI  | 34.5 | 53.0 | 55 | 994  |
| 1984 12 18 6 13 LILI  | 34.0 | 53.6 | 55 | 994  |
| 1984 12 18 12 13 LILI | 33.1 | 53.7 | 60 | 990  |
| 1984 12 18 18 13 LILI | 32.8 | 53.5 | 60 | 990  |
| 1984 12 19 0 13 LILI  | 32.5 | 53.3 | 60 | 990  |
| 1984 12 19 6 13 LILI  | 32.4 | 53.2 | 60 | 990  |
| 1984 12 19 12 13 LILI | 32.3 | 53.1 | 60 | 990  |
| 1984 12 19 18 13 LILI | 32.2 | 53.0 | 60 | 990  |
| 1984 12 20 0 13 LILI  | 32.0 | 52.9 | 60 | 989  |
| 1984 12 20 6 13 LILI  | 31.6 | 52.5 | 60 | 988  |
| 1984 12 20 12 13 LILI | 31.1 | 52.4 | 70 | 980  |
| 1984 12 20 18 13 LILI | 30.5 | 52.3 | 70 | 980  |
| 1984 12 21 0 13 LILI  | 30.0 | 52.2 | 70 | 980  |
| 1984 12 21 6 13 LILI  | 29.5 | 52.1 | 70 | 980  |
| 1984 12 21 12 13 LILI | 29.0 | 52.0 | 70 | 980  |
| 1984 12 21 18 13 LILI | 28.5 | 52.0 | 70 | 980  |
| 1984 12 22 0 13 LILI  | 27.8 | 52.2 | 70 | 980  |
| 1984 12 22 6 13 LILI  | 27.0 | 52.9 | 70 | 980  |
| 1984 12 22 12 13 LILI | 26.0 | 54.0 | 70 | 980  |
| 1984 12 22 18 13 LILI | 24.8 | 55.6 | 70 | 980  |
| 1984 12 23 0 13 LILI  | 23.6 | 57.1 | 65 | 987  |
| 1984 12 23 6 13 LILI  | 22.7 | 58.9 | 55 | 994  |
| 1984 12 23 12 13 LILI | 22.0 | 61.0 | 50 | 1001 |
| 1984 12 23 18 13 LILI | 21.2 | 63.1 | 45 | 1007 |
| 1984 12 24 0 13 LILI  | 20.5 | 65.1 | 35 | 1009 |
| 1984 12 24 6 13 LILI  | 19.9 | 67.5 | 30 | 1010 |
| 1984 12 24 12 13 LILI | 19.2 | 69.4 | 25 | 1012 |
| 1985 7 15 18 1 ANA    | 29.4 | 64.2 | 30 | 1011 |
| 1985 7 16 0 1 ANA     | 29.7 | 64.9 | 30 | 1011 |
| 1985 7 16 6 1 ANA     | 30.1 | 65.5 | 30 | 1011 |
| 1985 7 16 12 1 ANA    | 30.6 | 66.1 | 30 | 1010 |
| 1985 7 16 18 1 ANA    | 31.3 | 66.6 | 35 | 1009 |
| 1985 7 17 0 1 ANA     | 32.2 | 67.0 | 35 | 1009 |
| 1985 7 17 6 1 ANA     | 33.3 | 67.2 | 40 | 1008 |
| 1985 7 17 12 1 ANA    | 34.4 | 67.3 | 40 | 1007 |
| 1985 7 17 18 1 ANA    | 35.6 | 67.3 | 45 | 1006 |
| 1985 7 18 0 1 ANA     | 37.2 | 66.8 | 45 | 1004 |
| 1985 7 18 6 1 ANA     | 39.1 | 65.9 | 45 | 1004 |
| 1985 7 18 12 1 ANA    | 40.8 | 64.4 | 50 | 1000 |
| 1985 7 18 18 1 ANA    | 42.5 | 63.5 | 55 | 996  |
| 1985 7 19 0 1 ANA     | 44.2 | 60.3 | 60 | 996  |
| 1985 7 19 6 1 ANA     | 46.0 | 57.6 | 55 | 996  |
| 1985 7 19 12 1 ANA    | 48.0 | 54.5 | 50 | 996  |
| 1985 7 21 6 2 BOB     | 26.0 | 85.0 | 25 | 1012 |

|      |         |             |      |      |         |
|------|---------|-------------|------|------|---------|
| 1985 | 7 21 12 | 2 BOB       | 25.8 | 84.9 | 25 1011 |
| 1985 | 7 21 18 | 2 BOB       | 25.6 | 84.7 | 25 1011 |
| 1985 | 7 22 0  | 2 BOB       | 25.6 | 84.4 | 25 1010 |
| 1985 | 7 22 6  | 2 BOB       | 25.8 | 84.2 | 30 1009 |
| 1985 | 7 22 12 | 2 BOB       | 26.0 | 84.0 | 30 1008 |
| 1985 | 7 22 18 | 2 BOB       | 26.2 | 83.8 | 35 1007 |
| 1985 | 7 23 0  | 2 BOB       | 26.5 | 83.4 | 35 1004 |
| 1985 | 7 23 6  | 2 BOB       | 26.6 | 82.9 | 40 1004 |
| 1985 | 7 23 12 | 2 BOB       | 26.4 | 82.3 | 40 1005 |
| 1985 | 7 23 18 | 2 BOB       | 26.4 | 81.1 | 40 1006 |
| 1985 | 7 24 0  | 2 BOB       | 27.2 | 80.3 | 40 1006 |
| 1985 | 7 24 6  | 2 BOB       | 28.3 | 80.4 | 50 1005 |
| 1985 | 7 24 12 | 2 BOB       | 29.4 | 80.4 | 60 1004 |
| 1985 | 7 24 18 | 2 BOB       | 30.5 | 80.5 | 65 1003 |
| 1985 | 7 25 0  | 2 BOB       | 31.6 | 80.5 | 65 1002 |
| 1985 | 7 25 6  | 2 BOB       | 32.9 | 80.7 | 55 1004 |
| 1985 | 7 25 12 | 2 BOB       | 34.8 | 80.5 | 45 1006 |
| 1985 | 7 25 18 | 2 BOB       | 36.6 | 80.1 | 30 1009 |
| 1985 | 7 26 0  | 2 BOB       | 38.3 | 79.5 | 25 1011 |
| 1985 | 8 9 18  | 3 CLAUDETTE | 31.5 | 80.5 | 25 1013 |
| 1985 | 8 10 0  | 3 CLAUDETTE | 32.0 | 79.0 | 25 1012 |
| 1985 | 8 10 6  | 3 CLAUDETTE | 32.5 | 77.5 | 25 1011 |
| 1985 | 8 10 12 | 3 CLAUDETTE | 33.0 | 76.5 | 30 1009 |
| 1985 | 8 10 18 | 3 CLAUDETTE | 33.5 | 75.3 | 30 1007 |
| 1985 | 8 11 0  | 3 CLAUDETTE | 34.0 | 74.0 | 35 1005 |
| 1985 | 8 11 6  | 3 CLAUDETTE | 34.3 | 72.7 | 35 1004 |
| 1985 | 8 11 12 | 3 CLAUDETTE | 34.5 | 71.5 | 35 1003 |
| 1985 | 8 11 18 | 3 CLAUDETTE | 34.7 | 70.3 | 40 1002 |
| 1985 | 8 12 0  | 3 CLAUDETTE | 34.8 | 69.1 | 40 1001 |
| 1985 | 8 12 6  | 3 CLAUDETTE | 34.7 | 67.7 | 45 1000 |
| 1985 | 8 12 12 | 3 CLAUDETTE | 34.5 | 66.4 | 45 999  |
| 1985 | 8 12 18 | 3 CLAUDETTE | 34.4 | 64.9 | 50 997  |
| 1985 | 8 13 0  | 3 CLAUDETTE | 34.5 | 63.2 | 50 995  |
| 1985 | 8 13 6  | 3 CLAUDETTE | 35.1 | 61.5 | 55 993  |
| 1985 | 8 13 12 | 3 CLAUDETTE | 35.5 | 59.5 | 55 991  |
| 1985 | 8 13 18 | 3 CLAUDETTE | 35.3 | 57.5 | 60 989  |
| 1985 | 8 14 0  | 3 CLAUDETTE | 35.1 | 55.0 | 60 988  |
| 1985 | 8 14 6  | 3 CLAUDETTE | 35.2 | 52.5 | 65 988  |
| 1985 | 8 14 12 | 3 CLAUDETTE | 35.3 | 50.1 | 65 987  |
| 1985 | 8 14 18 | 3 CLAUDETTE | 35.5 | 47.8 | 65 986  |
| 1985 | 8 15 0  | 3 CLAUDETTE | 35.6 | 45.2 | 70 985  |
| 1985 | 8 15 6  | 3 CLAUDETTE | 35.7 | 42.6 | 70 981  |
| 1985 | 8 15 12 | 3 CLAUDETTE | 35.8 | 40.0 | 75 980  |
| 1985 | 8 15 18 | 3 CLAUDETTE | 36.4 | 37.0 | 75 981  |

|      |      |    |   |           |      |      |    |      |
|------|------|----|---|-----------|------|------|----|------|
| 1985 | 8 16 | 0  | 3 | CLAUDETTE | 37.5 | 34.5 | 60 | 993  |
| 1985 | 8 16 | 6  | 3 | CLAUDETTE | 39.2 | 31.6 | 45 | 998  |
| 1985 | 8 16 | 12 | 3 | CLAUDETTE | 40.7 | 28.7 | 40 | 1001 |
| 1985 | 8 16 | 18 | 3 | CLAUDETTE | 42.6 | 25.7 | 40 | 1003 |
| 1985 | 8 17 | 0  | 3 | CLAUDETTE | 44.5 | 22.5 | 40 | 1005 |
| 1985 | 8 12 | 0  | 4 | DANNY     | 18.5 | 80.7 | 25 | 1010 |
| 1985 | 8 12 | 6  | 4 | DANNY     | 19.2 | 81.4 | 25 | 1010 |
| 1985 | 8 12 | 12 | 4 | DANNY     | 19.9 | 82.1 | 25 | 1010 |
| 1985 | 8 12 | 18 | 4 | DANNY     | 20.5 | 82.9 | 25 | 1011 |
| 1985 | 8 13 | 0  | 4 | DANNY     | 21.1 | 83.7 | 25 | 1011 |
| 1985 | 8 13 | 6  | 4 | DANNY     | 21.7 | 84.6 | 25 | 1011 |
| 1985 | 8 13 | 12 | 4 | DANNY     | 22.3 | 85.6 | 30 | 1011 |
| 1985 | 8 13 | 18 | 4 | DANNY     | 23.0 | 86.7 | 30 | 1011 |
| 1985 | 8 14 | 0  | 4 | DANNY     | 23.7 | 87.8 | 35 | 1010 |
| 1985 | 8 14 | 6  | 4 | DANNY     | 24.4 | 88.8 | 45 | 1007 |
| 1985 | 8 14 | 12 | 4 | DANNY     | 25.1 | 89.8 | 50 | 1004 |
| 1985 | 8 14 | 18 | 4 | DANNY     | 25.9 | 90.7 | 60 | 1001 |
| 1985 | 8 15 | 0  | 4 | DANNY     | 26.8 | 91.5 | 70 | 997  |
| 1985 | 8 15 | 6  | 4 | DANNY     | 27.8 | 92.2 | 75 | 995  |
| 1985 | 8 15 | 12 | 4 | DANNY     | 28.9 | 92.6 | 80 | 988  |
| 1985 | 8 15 | 18 | 4 | DANNY     | 30.0 | 92.7 | 70 | 988  |
| 1985 | 8 16 | 0  | 4 | DANNY     | 31.0 | 92.4 | 50 | 992  |
| 1985 | 8 16 | 6  | 4 | DANNY     | 32.0 | 92.0 | 40 | 997  |
| 1985 | 8 16 | 12 | 4 | DANNY     | 32.9 | 91.4 | 30 | 1000 |
| 1985 | 8 16 | 18 | 4 | DANNY     | 33.7 | 90.4 | 30 | 1002 |
| 1985 | 8 17 | 0  | 4 | DANNY     | 34.3 | 89.2 | 30 | 1004 |
| 1985 | 8 17 | 6  | 4 | DANNY     | 34.7 | 87.8 | 30 | 1006 |
| 1985 | 8 17 | 12 | 4 | DANNY     | 35.0 | 86.3 | 30 | 1008 |
| 1985 | 8 17 | 18 | 4 | DANNY     | 35.3 | 84.8 | 30 | 1010 |
| 1985 | 8 18 | 0  | 4 | DANNY     | 35.6 | 83.4 | 25 | 1011 |
| 1985 | 8 18 | 6  | 4 | DANNY     | 35.8 | 82.0 | 25 | 1011 |
| 1985 | 8 18 | 12 | 4 | DANNY     | 36.0 | 80.6 | 25 | 1012 |
| 1985 | 8 18 | 18 | 4 | DANNY     | 36.3 | 79.2 | 25 | 1012 |
| 1985 | 8 19 | 0  | 4 | DANNY     | 36.7 | 77.9 | 25 | 1012 |
| 1985 | 8 19 | 6  | 4 | DANNY     | 37.1 | 76.6 | 25 | 1012 |
| 1985 | 8 19 | 12 | 4 | DANNY     | 37.5 | 75.3 | 25 | 1012 |
| 1985 | 8 19 | 18 | 4 | DANNY     | 38.0 | 74.0 | 25 | 1013 |
| 1985 | 8 20 | 0  | 4 | DANNY     | 38.5 | 72.7 | 20 | 1013 |
| 1985 | 8 20 | 6  | 4 | DANNY     | 39.1 | 71.5 | 20 | 1014 |
| 1985 | 8 20 | 12 | 4 | DANNY     | 39.7 | 70.4 | 20 | 1014 |
| 1985 | 8 20 | 18 | 4 | DANNY     | 40.4 | 69.4 | 20 | 1014 |
| 1985 | 8 28 | 0  | 5 | ELENA     | 19.8 | 74.0 | 30 | 1012 |
| 1985 | 8 28 | 6  | 5 | ELENA     | 20.8 | 76.0 | 30 | 1010 |
| 1985 | 8 28 | 12 | 5 | ELENA     | 21.8 | 78.0 | 30 | 1008 |



|      |         |          |      |      |         |
|------|---------|----------|------|------|---------|
| 1985 | 8 28 18 | 5 ELENA  | 22.6 | 80.0 | 45 1006 |
| 1985 | 8 29 0  | 5 ELENA  | 23.2 | 81.8 | 50 1004 |
| 1985 | 8 29 6  | 5 ELENA  | 24.0 | 83.5 | 55 1000 |
| 1985 | 8 29 12 | 5 ELENA  | 25.0 | 85.0 | 65 994  |
| 1985 | 8 29 18 | 5 ELENA  | 25.9 | 85.8 | 70 990  |
| 1985 | 8 30 0  | 5 ELENA  | 26.6 | 86.6 | 75 986  |
| 1985 | 8 30 6  | 5 ELENA  | 27.3 | 87.2 | 80 980  |
| 1985 | 8 30 12 | 5 ELENA  | 27.9 | 87.3 | 90 974  |
| 1985 | 8 30 18 | 5 ELENA  | 28.3 | 86.8 | 90 978  |
| 1985 | 8 31 0  | 5 ELENA  | 28.4 | 86.0 | 90 977  |
| 1985 | 8 31 6  | 5 ELENA  | 28.6 | 85.3 | 90 976  |
| 1985 | 8 31 12 | 5 ELENA  | 28.8 | 84.4 | 90 975  |
| 1985 | 8 31 18 | 5 ELENA  | 28.8 | 84.0 | 90 974  |
| 1985 | 9 1 0   | 5 ELENA  | 28.8 | 83.8 | 95 971  |
| 1985 | 9 1 6   | 5 ELENA  | 28.6 | 83.9 | 100 965 |
| 1985 | 9 1 12  | 5 ELENA  | 28.6 | 84.2 | 105 961 |
| 1985 | 9 1 18  | 5 ELENA  | 28.9 | 84.8 | 110 954 |
| 1985 | 9 2 0   | 5 ELENA  | 29.4 | 85.9 | 110 953 |
| 1985 | 9 2 6   | 5 ELENA  | 29.7 | 87.3 | 105 957 |
| 1985 | 9 2 12  | 5 ELENA  | 30.2 | 88.8 | 100 959 |
| 1985 | 9 2 18  | 5 ELENA  | 31.0 | 90.4 | 60 990  |
| 1985 | 9 3 0   | 5 ELENA  | 31.9 | 91.8 | 45 1000 |
| 1985 | 9 3 6   | 5 ELENA  | 32.4 | 92.8 | 30 1004 |
| 1985 | 9 3 12  | 5 ELENA  | 33.2 | 93.7 | 25 1006 |
| 1985 | 9 3 18  | 5 ELENA  | 34.5 | 94.0 | 25 1008 |
| 1985 | 9 4 0   | 5 ELENA  | 35.9 | 93.9 | 20 1010 |
| 1985 | 9 4 6   | 5 ELENA  | 37.0 | 93.2 | 20 1010 |
| 1985 | 9 4 12  | 5 ELENA  | 38.0 | 92.5 | 20 1010 |
| 1985 | 9 4 18  | 5 ELENA  | 38.8 | 91.4 | 20 1010 |
| 1985 | 9 15 18 | 6 FABIAN | 23.6 | 70.8 | 25 1008 |
| 1985 | 9 16 0  | 6 FABIAN | 24.0 | 70.1 | 25 1008 |
| 1985 | 9 16 6  | 6 FABIAN | 24.5 | 69.4 | 30 1006 |
| 1985 | 9 16 12 | 6 FABIAN | 25.1 | 68.0 | 30 1005 |
| 1985 | 9 16 18 | 6 FABIAN | 26.0 | 66.5 | 40 1003 |
| 1985 | 9 17 0  | 6 FABIAN | 26.7 | 64.8 | 45 1001 |
| 1985 | 9 17 6  | 6 FABIAN | 27.3 | 63.1 | 50 996  |
| 1985 | 9 17 12 | 6 FABIAN | 28.1 | 61.2 | 55 994  |
| 1985 | 9 17 18 | 6 FABIAN | 28.9 | 59.8 | 55 994  |
| 1985 | 9 18 0  | 6 FABIAN | 29.7 | 58.0 | 55 994  |
| 1985 | 9 18 6  | 6 FABIAN | 30.2 | 56.1 | 55 994  |
| 1985 | 9 18 12 | 6 FABIAN | 30.8 | 54.4 | 55 994  |
| 1985 | 9 18 18 | 6 FABIAN | 31.1 | 52.4 | 55 994  |
| 1985 | 9 19 0  | 6 FABIAN | 31.5 | 50.4 | 55 994  |
| 1985 | 9 19 6  | 6 FABIAN | 31.8 | 47.0 | 55 994  |

|      |         |          |      |      |     |      |
|------|---------|----------|------|------|-----|------|
| 1985 | 9 19 12 | 6 FABIAN | 32.1 | 42.5 | 55  | 994  |
| 1985 | 9 16 12 | 7 GLORIA | 13.3 | 23.6 | 25  | 1009 |
| 1985 | 9 16 18 | 7 GLORIA | 13.8 | 24.8 | 25  | 1008 |
| 1985 | 9 17 0  | 7 GLORIA | 14.1 | 25.9 | 30  | 1008 |
| 1985 | 9 17 6  | 7 GLORIA | 14.3 | 27.1 | 30  | 1008 |
| 1985 | 9 17 12 | 7 GLORIA | 14.6 | 28.3 | 35  | 1007 |
| 1985 | 9 17 18 | 7 GLORIA | 14.7 | 29.6 | 35  | 1007 |
| 1985 | 9 18 0  | 7 GLORIA | 14.9 | 31.7 | 35  | 1006 |
| 1985 | 9 18 6  | 7 GLORIA | 15.0 | 33.8 | 35  | 1006 |
| 1985 | 9 18 12 | 7 GLORIA | 15.1 | 35.9 | 35  | 1006 |
| 1985 | 9 18 18 | 7 GLORIA | 15.4 | 38.1 | 30  | 1006 |
| 1985 | 9 19 0  | 7 GLORIA | 15.8 | 39.5 | 30  | 1006 |
| 1985 | 9 19 6  | 7 GLORIA | 16.2 | 40.9 | 30  | 1006 |
| 1985 | 9 19 12 | 7 GLORIA | 16.6 | 42.2 | 30  | 1006 |
| 1985 | 9 19 18 | 7 GLORIA | 17.0 | 43.8 | 30  | 1006 |
| 1985 | 9 20 0  | 7 GLORIA | 17.2 | 45.1 | 35  | 1005 |
| 1985 | 9 20 6  | 7 GLORIA | 17.4 | 46.7 | 40  | 1004 |
| 1985 | 9 20 12 | 7 GLORIA | 17.5 | 48.1 | 45  | 1003 |
| 1985 | 9 20 18 | 7 GLORIA | 17.6 | 49.8 | 45  | 1002 |
| 1985 | 9 21 0  | 7 GLORIA | 17.7 | 51.2 | 50  | 1001 |
| 1985 | 9 21 6  | 7 GLORIA | 17.7 | 52.8 | 55  | 1001 |
| 1985 | 9 21 12 | 7 GLORIA | 17.7 | 54.2 | 60  | 1000 |
| 1985 | 9 21 18 | 7 GLORIA | 17.7 | 55.3 | 65  | 1000 |
| 1985 | 9 22 0  | 7 GLORIA | 17.8 | 56.3 | 65  | 1000 |
| 1985 | 9 22 6  | 7 GLORIA | 17.8 | 57.1 | 70  | 996  |
| 1985 | 9 22 12 | 7 GLORIA | 17.8 | 58.2 | 70  | 992  |
| 1985 | 9 22 18 | 7 GLORIA | 18.4 | 59.0 | 65  | 990  |
| 1985 | 9 23 0  | 7 GLORIA | 19.0 | 60.2 | 65  | 990  |
| 1985 | 9 23 6  | 7 GLORIA | 19.7 | 61.5 | 65  | 989  |
| 1985 | 9 23 12 | 7 GLORIA | 20.4 | 62.9 | 65  | 987  |
| 1985 | 9 23 18 | 7 GLORIA | 21.0 | 64.2 | 75  | 980  |
| 1985 | 9 24 0  | 7 GLORIA | 21.5 | 65.5 | 95  | 956  |
| 1985 | 9 24 6  | 7 GLORIA | 21.9 | 66.8 | 100 | 952  |
| 1985 | 9 24 12 | 7 GLORIA | 22.5 | 67.9 | 100 | 950  |
| 1985 | 9 24 18 | 7 GLORIA | 23.2 | 69.0 | 105 | 935  |
| 1985 | 9 25 0  | 7 GLORIA | 24.2 | 70.0 | 120 | 920  |
| 1985 | 9 25 6  | 7 GLORIA | 25.1 | 70.9 | 125 | 920  |
| 1985 | 9 25 12 | 7 GLORIA | 26.1 | 72.0 | 115 | 926  |
| 1985 | 9 25 18 | 7 GLORIA | 26.9 | 73.0 | 95  | 933  |
| 1985 | 9 26 0  | 7 GLORIA | 27.8 | 74.0 | 85  | 940  |
| 1985 | 9 26 6  | 7 GLORIA | 28.9 | 75.0 | 80  | 944  |
| 1985 | 9 26 12 | 7 GLORIA | 30.0 | 75.5 | 80  | 946  |
| 1985 | 9 26 18 | 7 GLORIA | 31.4 | 76.2 | 85  | 944  |
| 1985 | 9 27 0  | 7 GLORIA | 33.2 | 76.0 | 90  | 942  |

|      |      |    |   |        |      |      |    |      |
|------|------|----|---|--------|------|------|----|------|
| 1985 | 9 27 | 6  | 7 | GLORIA | 35.5 | 75.5 | 90 | 942  |
| 1985 | 9 27 | 12 | 7 | GLORIA | 38.4 | 74.5 | 85 | 951  |
| 1985 | 9 27 | 18 | 7 | GLORIA | 41.9 | 72.8 | 75 | 964  |
| 1985 | 9 28 | 0  | 7 | GLORIA | 45.5 | 70.0 | 50 | 986  |
| 1985 | 9 28 | 6  | 7 | GLORIA | 48.1 | 67.8 | 50 | 987  |
| 1985 | 9 28 | 12 | 7 | GLORIA | 49.5 | 64.5 | 50 | 987  |
| 1985 | 9 28 | 18 | 7 | GLORIA | 50.8 | 61.2 | 50 | 987  |
| 1985 | 9 29 | 0  | 7 | GLORIA | 51.5 | 57.5 | 50 | 990  |
| 1985 | 9 29 | 6  | 7 | GLORIA | 52.1 | 53.8 | 50 | 990  |
| 1985 | 9 29 | 12 | 7 | GLORIA | 52.4 | 50.0 | 50 | 990  |
| 1985 | 9 29 | 18 | 7 | GLORIA | 52.5 | 47.5 | 50 | 990  |
| 1985 | 9 30 | 0  | 7 | GLORIA | 52.5 | 45.0 | 50 | 990  |
| 1985 | 9 30 | 6  | 7 | GLORIA | 52.5 | 42.5 | 50 | 990  |
| 1985 | 9 30 | 12 | 7 | GLORIA | 52.5 | 40.0 | 50 | 990  |
| 1985 | 9 30 | 18 | 7 | GLORIA | 52.9 | 37.9 | 50 | 990  |
| 1985 | 10 1 | 0  | 7 | GLORIA | 53.3 | 35.9 | 50 | 990  |
| 1985 | 10 1 | 6  | 7 | GLORIA | 53.8 | 34.0 | 50 | 990  |
| 1985 | 10 1 | 12 | 7 | GLORIA | 54.5 | 32.0 | 50 | 990  |
| 1985 | 10 1 | 18 | 7 | GLORIA | 55.5 | 30.0 | 50 | 990  |
| 1985 | 10 2 | 0  | 7 | GLORIA | 56.6 | 29.0 | 50 | 960  |
| 1985 | 9 21 | 18 | 8 | HENRI  | 29.6 | 74.3 | 25 | 1008 |
| 1985 | 9 22 | 0  | 8 | HENRI  | 30.5 | 74.4 | 25 | 1008 |
| 1985 | 9 22 | 6  | 8 | HENRI  | 31.5 | 74.5 | 25 | 1009 |
| 1985 | 9 22 | 12 | 8 | HENRI  | 32.4 | 74.6 | 25 | 1011 |
| 1985 | 9 22 | 18 | 8 | HENRI  | 33.3 | 74.6 | 30 | 1011 |
| 1985 | 9 23 | 0  | 8 | HENRI  | 34.3 | 74.5 | 30 | 1010 |
| 1985 | 9 23 | 6  | 8 | HENRI  | 35.3 | 74.3 | 35 | 1007 |
| 1985 | 9 23 | 12 | 8 | HENRI  | 36.0 | 74.1 | 50 | 996  |
| 1985 | 9 23 | 18 | 8 | HENRI  | 36.7 | 74.0 | 45 | 1000 |
| 1985 | 9 24 | 0  | 8 | HENRI  | 37.4 | 74.0 | 40 | 1004 |
| 1985 | 9 24 | 6  | 8 | HENRI  | 38.2 | 74.0 | 35 | 1005 |
| 1985 | 9 24 | 12 | 8 | HENRI  | 39.2 | 73.7 | 35 | 1006 |
| 1985 | 9 24 | 18 | 8 | HENRI  | 40.3 | 73.0 | 35 | 1006 |
| 1985 | 9 25 | 0  | 8 | HENRI  | 41.3 | 71.8 | 30 | 1007 |
| 1985 | 10 7 | 0  | 9 | ISABEL | 17.8 | 69.2 | 30 | 1006 |
| 1985 | 10 7 | 6  | 9 | ISABEL | 18.5 | 70.5 | 35 | 1006 |
| 1985 | 10 7 | 12 | 9 | ISABEL | 19.8 | 71.2 | 40 | 1006 |
| 1985 | 10 7 | 18 | 9 | ISABEL | 21.1 | 71.5 | 40 | 1005 |
| 1985 | 10 8 | 0  | 9 | ISABEL | 22.4 | 71.2 | 45 | 1005 |
| 1985 | 10 8 | 6  | 9 | ISABEL | 24.1 | 71.1 | 50 | 1005 |
| 1985 | 10 8 | 12 | 9 | ISABEL | 25.2 | 71.5 | 55 | 1003 |
| 1985 | 10 8 | 18 | 9 | ISABEL | 26.3 | 72.0 | 60 | 1002 |
| 1985 | 10 9 | 0  | 9 | ISABEL | 27.3 | 72.8 | 60 | 997  |
| 1985 | 10 9 | 6  | 9 | ISABEL | 27.9 | 73.9 | 60 | 1001 |

|                        |      |      |         |
|------------------------|------|------|---------|
| 1985 10 9 12 9 ISABEL  | 28.1 | 75.2 | 60 1003 |
| 1985 10 9 18 9 ISABEL  | 28.2 | 76.6 | 60 1004 |
| 1985 10 10 0 9 ISABEL  | 29.0 | 77.8 | 55 1005 |
| 1985 10 10 6 9 ISABEL  | 29.1 | 79.2 | 45 1004 |
| 1985 10 10 12 9 ISABEL | 29.6 | 80.3 | 40 1006 |
| 1985 10 10 18 9 ISABEL | 30.3 | 81.0 | 35 1008 |
| 1985 10 11 0 9 ISABEL  | 30.8 | 81.7 | 30 1009 |
| 1985 10 11 6 9 ISABEL  | 31.3 | 81.8 | 30 1011 |
| 1985 10 11 12 9 ISABEL | 31.7 | 81.6 | 25 1012 |
| 1985 10 11 18 9 ISABEL | 31.8 | 80.9 | 25 1013 |
| 1985 10 12 0 9 ISABEL  | 31.7 | 80.6 | 25 1013 |
| 1985 10 12 6 9 ISABEL  | 31.6 | 80.3 | 25 1013 |
| 1985 10 12 12 9 ISABEL | 31.5 | 79.9 | 25 1014 |
| 1985 10 12 18 9 ISABEL | 31.5 | 79.5 | 25 1013 |
| 1985 10 13 0 9 ISABEL  | 31.7 | 79.1 | 25 1013 |
| 1985 10 13 6 9 ISABEL  | 32.0 | 78.8 | 25 1013 |
| 1985 10 13 12 9 ISABEL | 32.3 | 78.4 | 25 1013 |
| 1985 10 13 18 9 ISABEL | 32.6 | 78.0 | 25 1012 |
| 1985 10 14 0 9 ISABEL  | 32.9 | 77.7 | 25 1012 |
| 1985 10 14 6 9 ISABEL  | 33.2 | 77.1 | 25 1011 |
| 1985 10 14 12 9 ISABEL | 33.5 | 76.6 | 25 1010 |
| 1985 10 14 18 9 ISABEL | 33.7 | 76.0 | 25 1010 |
| 1985 10 15 0 9 ISABEL  | 33.9 | 75.2 | 25 1010 |
| 1985 10 15 6 9 ISABEL  | 34.7 | 74.0 | 25 1010 |
| 1985 10 15 12 9 ISABEL | 35.8 | 72.7 | 25 1010 |
| 1985 10 26 0 10 JUAN   | 24.5 | 90.5 | 30 1005 |
| 1985 10 26 6 10 JUAN   | 24.2 | 91.5 | 30 1002 |
| 1985 10 26 12 10 JUAN  | 23.8 | 92.5 | 35 999  |
| 1985 10 26 18 10 JUAN  | 24.4 | 92.8 | 40 996  |
| 1985 10 27 0 10 JUAN   | 24.6 | 92.0 | 45 993  |
| 1985 10 27 6 10 JUAN   | 25.3 | 92.2 | 50 990  |
| 1985 10 27 12 10 JUAN  | 25.7 | 91.5 | 55 986  |
| 1985 10 27 18 10 JUAN  | 26.4 | 91.1 | 60 984  |
| 1985 10 28 0 10 JUAN   | 27.8 | 91.2 | 65 982  |
| 1985 10 28 6 10 JUAN   | 28.6 | 91.5 | 70 975  |
| 1985 10 28 12 10 JUAN  | 29.4 | 92.0 | 75 972  |
| 1985 10 28 18 10 JUAN  | 29.3 | 93.0 | 75 971  |
| 1985 10 29 0 10 JUAN   | 28.9 | 92.5 | 75 973  |
| 1985 10 29 6 10 JUAN   | 29.0 | 91.9 | 70 975  |
| 1985 10 29 12 10 JUAN  | 29.6 | 91.3 | 65 974  |
| 1985 10 29 18 10 JUAN  | 30.3 | 91.9 | 60 978  |
| 1985 10 30 0 10 JUAN   | 30.1 | 92.3 | 60 980  |
| 1985 10 30 6 10 JUAN   | 29.8 | 92.2 | 55 982  |
| 1985 10 30 12 10 JUAN  | 29.6 | 92.1 | 55 982  |

|                       |      |      |     |      |
|-----------------------|------|------|-----|------|
| 1985 10 30 18 10 JUAN | 29.3 | 91.8 | 55  | 982  |
| 1985 10 31 0 10 JUAN  | 29.1 | 91.3 | 55  | 982  |
| 1985 10 31 6 10 JUAN  | 28.9 | 90.3 | 55  | 980  |
| 1985 10 31 12 10 JUAN | 29.3 | 89.1 | 60  | 978  |
| 1985 10 31 18 10 JUAN | 30.3 | 87.7 | 55  | 982  |
| 1985 11 1 0 10 JUAN   | 31.8 | 87.0 | 40  | 984  |
| 1985 11 1 6 10 JUAN   | 33.5 | 86.7 | 35  | 986  |
| 1985 11 1 12 10 JUAN  | 35.2 | 86.6 | 30  | 989  |
| 1985 11 1 18 10 JUAN  | 36.8 | 87.1 | 25  | 992  |
| 1985 11 15 18 11 KATE | 21.1 | 63.8 | 35  | 999  |
| 1985 11 16 0 11 KATE  | 21.6 | 63.9 | 45  | 998  |
| 1985 11 16 6 11 KATE  | 21.7 | 64.2 | 50  | 996  |
| 1985 11 16 12 11 KATE | 21.5 | 64.8 | 55  | 993  |
| 1985 11 16 18 11 KATE | 21.1 | 65.3 | 70  | 987  |
| 1985 11 17 0 11 KATE  | 20.7 | 66.0 | 75  | 981  |
| 1985 11 17 6 11 KATE  | 20.4 | 66.4 | 75  | 984  |
| 1985 11 17 12 11 KATE | 20.7 | 67.3 | 75  | 982  |
| 1985 11 17 18 11 KATE | 21.1 | 68.8 | 80  | 977  |
| 1985 11 18 0 11 KATE  | 21.4 | 70.0 | 80  | 976  |
| 1985 11 18 6 11 KATE  | 21.6 | 71.8 | 80  | 975  |
| 1985 11 18 12 11 KATE | 21.6 | 73.3 | 80  | 975  |
| 1985 11 18 18 11 KATE | 21.9 | 75.1 | 85  | 972  |
| 1985 11 19 0 11 KATE  | 22.1 | 76.8 | 95  | 967  |
| 1985 11 19 6 11 KATE  | 22.1 | 78.4 | 95  | 968  |
| 1985 11 19 12 11 KATE | 22.7 | 80.2 | 90  | 971  |
| 1985 11 19 18 11 KATE | 23.2 | 81.9 | 80  | 976  |
| 1985 11 20 0 11 KATE  | 23.9 | 83.5 | 85  | 972  |
| 1985 11 20 6 11 KATE  | 24.6 | 84.5 | 95  | 968  |
| 1985 11 20 12 11 KATE | 25.2 | 85.3 | 105 | 956  |
| 1985 11 20 18 11 KATE | 26.0 | 86.0 | 105 | 955  |
| 1985 11 21 0 11 KATE  | 26.8 | 86.5 | 105 | 954  |
| 1985 11 21 6 11 KATE  | 27.5 | 86.6 | 100 | 961  |
| 1985 11 21 12 11 KATE | 28.3 | 86.5 | 95  | 965  |
| 1985 11 21 18 11 KATE | 29.2 | 86.1 | 85  | 967  |
| 1985 11 22 0 11 KATE  | 30.2 | 85.1 | 80  | 975  |
| 1985 11 22 6 11 KATE  | 31.5 | 83.5 | 65  | 983  |
| 1985 11 22 12 11 KATE | 32.5 | 81.5 | 50  | 990  |
| 1985 11 22 18 11 KATE | 33.7 | 79.2 | 45  | 996  |
| 1985 11 23 0 11 KATE  | 34.7 | 76.2 | 40  | 1003 |
| 1985 11 23 6 11 KATE  | 34.4 | 73.5 | 35  | 1005 |
| 1985 11 23 12 11 KATE | 34.0 | 72.0 | 35  | 1006 |
| 1985 11 23 18 11 KATE | 33.5 | 70.5 | 35  | 1006 |
| 1986 6 5 0 1 ANDREW   | 26.2 | 75.8 | 30  | 1007 |
| 1986 6 5 6 1 ANDREW   | 27.4 | 76.0 | 30  | 1006 |

|      |   |    |    |   |         |      |      |    |      |
|------|---|----|----|---|---------|------|------|----|------|
| 1986 | 6 | 5  | 12 | 1 | ANDREW  | 28.4 | 76.4 | 30 | 1005 |
| 1986 | 6 | 5  | 18 | 1 | ANDREW  | 29.1 | 77.0 | 30 | 1003 |
| 1986 | 6 | 6  | 0  | 1 | ANDREW  | 29.7 | 77.5 | 35 | 1002 |
| 1986 | 6 | 6  | 6  | 1 | ANDREW  | 30.2 | 77.8 | 40 | 1003 |
| 1986 | 6 | 6  | 12 | 1 | ANDREW  | 30.7 | 78.0 | 45 | 1005 |
| 1986 | 6 | 6  | 18 | 1 | ANDREW  | 31.4 | 77.9 | 45 | 1004 |
| 1986 | 6 | 7  | 0  | 1 | ANDREW  | 31.9 | 77.8 | 45 | 1003 |
| 1986 | 6 | 7  | 6  | 1 | ANDREW  | 32.8 | 76.9 | 45 | 1001 |
| 1986 | 6 | 7  | 12 | 1 | ANDREW  | 33.6 | 76.0 | 45 | 999  |
| 1986 | 6 | 7  | 18 | 1 | ANDREW  | 34.3 | 75.0 | 45 | 1000 |
| 1986 | 6 | 8  | 0  | 1 | ANDREW  | 35.2 | 73.9 | 45 | 1002 |
| 1986 | 6 | 8  | 6  | 1 | ANDREW  | 36.3 | 72.7 | 45 | 1002 |
| 1986 | 6 | 8  | 12 | 1 | ANDREW  | 37.9 | 71.0 | 40 | 1002 |
| 1986 | 6 | 8  | 18 | 1 | ANDREW  | 39.6 | 68.9 | 35 | 1001 |
| 1986 | 6 | 23 | 18 | 2 | BONNIE  | 25.6 | 87.2 | 25 | 1014 |
| 1986 | 6 | 24 | 0  | 2 | BONNIE  | 25.7 | 87.8 | 25 | 1013 |
| 1986 | 6 | 24 | 6  | 2 | BONNIE  | 26.0 | 88.4 | 25 | 1014 |
| 1986 | 6 | 24 | 12 | 2 | BONNIE  | 26.4 | 88.9 | 30 | 1011 |
| 1986 | 6 | 24 | 18 | 2 | BONNIE  | 26.6 | 89.5 | 40 | 1006 |
| 1986 | 6 | 25 | 0  | 2 | BONNIE  | 26.7 | 90.3 | 45 | 1001 |
| 1986 | 6 | 25 | 6  | 2 | BONNIE  | 26.8 | 91.0 | 50 | 1002 |
| 1986 | 6 | 25 | 12 | 2 | BONNIE  | 27.2 | 91.7 | 55 | 997  |
| 1986 | 6 | 25 | 18 | 2 | BONNIE  | 27.7 | 92.2 | 65 | 1001 |
| 1986 | 6 | 26 | 0  | 2 | BONNIE  | 28.2 | 92.9 | 70 | 999  |
| 1986 | 6 | 26 | 6  | 2 | BONNIE  | 29.0 | 93.7 | 75 | 995  |
| 1986 | 6 | 26 | 12 | 2 | BONNIE  | 29.9 | 94.3 | 65 | 992  |
| 1986 | 6 | 26 | 18 | 2 | BONNIE  | 30.9 | 94.7 | 35 | 1000 |
| 1986 | 6 | 27 | 0  | 2 | BONNIE  | 31.8 | 94.7 | 30 | 1009 |
| 1986 | 6 | 27 | 6  | 2 | BONNIE  | 32.8 | 94.7 | 25 | 1015 |
| 1986 | 6 | 27 | 12 | 2 | BONNIE  | 33.9 | 94.3 | 20 | 1016 |
| 1986 | 6 | 27 | 18 | 2 | BONNIE  | 34.8 | 93.5 | 20 | 1016 |
| 1986 | 6 | 28 | 0  | 2 | BONNIE  | 35.6 | 92.5 | 15 | 1014 |
| 1986 | 6 | 28 | 6  | 2 | BONNIE  | 36.5 | 91.3 | 10 | 1013 |
| 1986 | 6 | 28 | 12 | 2 | BONNIE  | 37.2 | 90.0 | 10 | 1012 |
| 1986 | 8 | 13 | 12 | 3 | CHARLEY | 30.1 | 84.0 | 10 | 1009 |
| 1986 | 8 | 13 | 18 | 3 | CHARLEY | 30.8 | 84.0 | 10 | 1012 |
| 1986 | 8 | 14 | 0  | 3 | CHARLEY | 31.4 | 83.6 | 10 | 1013 |
| 1986 | 8 | 14 | 6  | 3 | CHARLEY | 32.0 | 83.1 | 10 | 1014 |
| 1986 | 8 | 14 | 12 | 3 | CHARLEY | 32.5 | 82.5 | 10 | 1015 |
| 1986 | 8 | 14 | 18 | 3 | CHARLEY | 32.4 | 82.0 | 10 | 1015 |
| 1986 | 8 | 15 | 0  | 3 | CHARLEY | 32.3 | 81.2 | 15 | 1013 |
| 1986 | 8 | 15 | 6  | 3 | CHARLEY | 32.3 | 80.0 | 15 | 1013 |
| 1986 | 8 | 15 | 12 | 3 | CHARLEY | 32.2 | 79.0 | 30 | 1009 |
| 1986 | 8 | 15 | 18 | 3 | CHARLEY | 32.2 | 78.5 | 35 | 1007 |

|      |      |    |   |         |      |       |    |      |
|------|------|----|---|---------|------|-------|----|------|
| 1986 | 8 16 | 0  | 3 | CHARLEY | 32.3 | 78.1  | 40 | 1004 |
| 1986 | 8 16 | 6  | 3 | CHARLEY | 32.4 | 77.9  | 40 | 1002 |
| 1986 | 8 16 | 12 | 3 | CHARLEY | 32.6 | 77.6  | 45 | 999  |
| 1986 | 8 16 | 18 | 3 | CHARLEY | 32.9 | 77.4  | 50 | 997  |
| 1986 | 8 17 | 0  | 3 | CHARLEY | 33.2 | 77.1  | 55 | 995  |
| 1986 | 8 17 | 6  | 3 | CHARLEY | 33.7 | 76.9  | 60 | 993  |
| 1986 | 8 17 | 12 | 3 | CHARLEY | 34.4 | 76.6  | 65 | 991  |
| 1986 | 8 17 | 18 | 3 | CHARLEY | 35.4 | 76.2  | 65 | 988  |
| 1986 | 8 18 | 0  | 3 | CHARLEY | 36.5 | 75.8  | 70 | 987  |
| 1986 | 8 18 | 6  | 3 | CHARLEY | 37.4 | 75.2  | 65 | 990  |
| 1986 | 8 18 | 12 | 3 | CHARLEY | 38.2 | 74.1  | 60 | 992  |
| 1986 | 8 18 | 18 | 3 | CHARLEY | 39.0 | 72.6  | 60 | 994  |
| 1986 | 8 19 | 0  | 3 | CHARLEY | 39.7 | 70.9  | 55 | 997  |
| 1986 | 8 19 | 6  | 3 | CHARLEY | 40.4 | 69.1  | 50 | 999  |
| 1986 | 8 19 | 12 | 3 | CHARLEY | 40.9 | 67.5  | 45 | 1000 |
| 1986 | 8 19 | 18 | 3 | CHARLEY | 41.3 | 65.8  | 45 | 1002 |
| 1986 | 8 20 | 0  | 3 | CHARLEY | 41.5 | 64.0  | 40 | 1003 |
| 1986 | 8 20 | 6  | 3 | CHARLEY | 41.6 | 62.5  | 40 | 1004 |
| 1986 | 8 20 | 12 | 3 | CHARLEY | 41.7 | 60.2  | 40 | 1005 |
| 1986 | 8 20 | 18 | 3 | CHARLEY | 41.7 | 58.4  | 40 | 1005 |
| 1986 | 8 21 | 0  | 3 | CHARLEY | 41.6 | 56.6  | 40 | 1000 |
| 1986 | 8 21 | 6  | 3 | CHARLEY | 41.5 | 54.8  | 40 | 997  |
| 1986 | 8 21 | 12 | 3 | CHARLEY | 41.4 | 53.2  | 40 | 992  |
| 1986 | 8 21 | 18 | 3 | CHARLEY | 41.3 | 51.2  | 45 | 991  |
| 1986 | 8 22 | 0  | 3 | CHARLEY | 41.3 | 49.4  | 45 | 990  |
| 1986 | 8 22 | 6  | 3 | CHARLEY | 41.3 | 47.6  | 45 | 989  |
| 1986 | 8 22 | 12 | 3 | CHARLEY | 41.4 | 46.2  | 45 | 989  |
| 1986 | 8 22 | 18 | 3 | CHARLEY | 41.5 | 44.8  | 45 | 989  |
| 1986 | 8 23 | 0  | 3 | CHARLEY | 41.8 | 43.2  | 45 | 988  |
| 1986 | 8 23 | 6  | 3 | CHARLEY | 42.3 | 41.6  | 45 | 989  |
| 1986 | 8 23 | 12 | 3 | CHARLEY | 43.0 | 39.6  | 45 | 989  |
| 1986 | 8 23 | 18 | 3 | CHARLEY | 43.9 | 37.2  | 45 | 989  |
| 1986 | 8 24 | 0  | 3 | CHARLEY | 44.9 | 34.4  | 45 | 990  |
| 1986 | 8 24 | 6  | 3 | CHARLEY | 46.0 | 31.6  | 40 | 992  |
| 1986 | 8 24 | 12 | 3 | CHARLEY | 47.0 | 28.8  | 40 | 995  |
| 1986 | 8 24 | 18 | 3 | CHARLEY | 48.2 | 26.0  | 40 | 997  |
| 1986 | 8 25 | 0  | 3 | CHARLEY | 49.2 | 21.6  | 40 | 999  |
| 1986 | 8 25 | 6  | 3 | CHARLEY | 50.0 | 16.4  | 40 | 1000 |
| 1986 | 8 25 | 12 | 3 | CHARLEY | 50.7 | 11.4  | 40 | 994  |
| 1986 | 8 25 | 18 | 3 | CHARLEY | 51.4 | 7.2   | 50 | 988  |
| 1986 | 8 26 | 0  | 3 | CHARLEY | 52.2 | 4.4   | 45 | 981  |
| 1986 | 8 26 | 6  | 3 | CHARLEY | 52.9 | 2.0   | 45 | 980  |
| 1986 | 8 26 | 12 | 3 | CHARLEY | 53.6 | 0.0   | 45 | 982  |
| 1986 | 8 26 | 18 | 3 | CHARLEY | 54.3 | 358.0 | 45 | 986  |

|      |      |    |   |          |      |       |    |      |
|------|------|----|---|----------|------|-------|----|------|
| 1986 | 8 27 | 0  | 3 | CHARLEY  | 55.0 | 356.3 | 45 | 984  |
| 1986 | 8 27 | 6  | 3 | CHARLEY  | 55.5 | 355.0 | 45 | 983  |
| 1986 | 8 27 | 12 | 3 | CHARLEY  | 56.0 | 354.2 | 35 | 985  |
| 1986 | 8 27 | 18 | 3 | CHARLEY  | 56.3 | 354.0 | 35 | 989  |
| 1986 | 8 28 | 0  | 3 | CHARLEY  | 56.6 | 354.0 | 35 | 989  |
| 1986 | 8 28 | 6  | 3 | CHARLEY  | 56.8 | 354.0 | 35 | 991  |
| 1986 | 8 28 | 12 | 3 | CHARLEY  | 57.0 | 354.0 | 30 | 998  |
| 1986 | 8 28 | 18 | 3 | CHARLEY  | 57.0 | 354.5 | 30 | 999  |
| 1986 | 8 29 | 0  | 3 | CHARLEY  | 57.0 | 355.0 | 25 | 1002 |
| 1986 | 8 29 | 6  | 3 | CHARLEY  | 56.8 | 355.0 | 20 | 1004 |
| 1986 | 8 29 | 12 | 3 | CHARLEY  | 56.5 | 355.0 | 20 | 1004 |
| 1986 | 8 29 | 18 | 3 | CHARLEY  | 56.2 | 354.0 | 15 | 1004 |
| 1986 | 8 30 | 0  | 3 | CHARLEY  | 56.2 | 352.0 | 15 | 1006 |
| 1986 | 9 7  | 6  | 4 | DANIELLE | 10.5 | 52.0  | 25 | 1008 |
| 1986 | 9 7  | 12 | 4 | DANIELLE | 11.0 | 54.0  | 30 | 1005 |
| 1986 | 9 7  | 18 | 4 | DANIELLE | 11.2 | 55.8  | 35 | 1003 |
| 1986 | 9 8  | 0  | 4 | DANIELLE | 11.8 | 57.5  | 45 | 1000 |
| 1986 | 9 8  | 6  | 4 | DANIELLE | 12.2 | 59.4  | 50 | 1000 |
| 1986 | 9 8  | 12 | 4 | DANIELLE | 12.5 | 61.2  | 50 | 1002 |
| 1986 | 9 8  | 18 | 4 | DANIELLE | 13.0 | 63.0  | 50 | 1002 |
| 1986 | 9 9  | 0  | 4 | DANIELLE | 13.4 | 64.8  | 45 | 1004 |
| 1986 | 9 9  | 6  | 4 | DANIELLE | 13.8 | 66.5  | 40 | 1006 |
| 1986 | 9 9  | 12 | 4 | DANIELLE | 14.0 | 68.5  | 35 | 1008 |
| 1986 | 9 9  | 18 | 4 | DANIELLE | 14.5 | 70.5  | 30 | 1010 |
| 1986 | 9 10 | 0  | 4 | DANIELLE | 14.8 | 72.5  | 30 | 1012 |
| 1986 | 9 10 | 6  | 4 | DANIELLE | 14.9 | 75.5  | 30 | 1012 |
| 1986 | 9 10 | 12 | 4 | DANIELLE | 14.8 | 78.5  | 30 | 1013 |
| 1986 | 9 10 | 18 | 5 | EARL     | 21.8 | 50.8  | 30 | 1010 |
| 1986 | 9 11 | 0  | 5 | EARL     | 22.4 | 51.6  | 35 | 1009 |
| 1986 | 9 11 | 6  | 5 | EARL     | 23.2 | 52.3  | 45 | 1006 |
| 1986 | 9 11 | 12 | 5 | EARL     | 24.1 | 52.9  | 55 | 1002 |
| 1986 | 9 11 | 18 | 5 | EARL     | 25.0 | 53.4  | 70 | 999  |
| 1986 | 9 12 | 0  | 5 | EARL     | 25.6 | 53.8  | 75 | 996  |
| 1986 | 9 12 | 6  | 5 | EARL     | 26.3 | 54.3  | 80 | 993  |
| 1986 | 9 12 | 12 | 5 | EARL     | 26.8 | 54.8  | 85 | 988  |
| 1986 | 9 12 | 18 | 5 | EARL     | 27.2 | 55.4  | 90 | 985  |
| 1986 | 9 13 | 0  | 5 | EARL     | 28.1 | 55.5  | 90 | 983  |
| 1986 | 9 13 | 6  | 5 | EARL     | 28.8 | 55.3  | 90 | 983  |
| 1986 | 9 13 | 12 | 5 | EARL     | 29.5 | 54.9  | 90 | 983  |
| 1986 | 9 13 | 18 | 5 | EARL     | 30.1 | 54.7  | 90 | 983  |
| 1986 | 9 14 | 0  | 5 | EARL     | 30.4 | 53.8  | 90 | 982  |
| 1986 | 9 14 | 6  | 5 | EARL     | 30.5 | 53.1  | 90 | 980  |
| 1986 | 9 14 | 12 | 5 | EARL     | 30.6 | 52.4  | 90 | 979  |
| 1986 | 9 14 | 18 | 5 | EARL     | 30.6 | 51.7  | 90 | 979  |



|      |    |    |    |   |           |      |      |    |      |
|------|----|----|----|---|-----------|------|------|----|------|
| 1986 | 9  | 15 | 0  | 5 | EARL      | 30.4 | 51.1 | 90 | 980  |
| 1986 | 9  | 15 | 6  | 5 | EARL      | 30.0 | 50.6 | 90 | 980  |
| 1986 | 9  | 15 | 12 | 5 | EARL      | 29.6 | 50.1 | 90 | 981  |
| 1986 | 9  | 15 | 18 | 5 | EARL      | 29.2 | 49.6 | 85 | 982  |
| 1986 | 9  | 16 | 0  | 5 | EARL      | 29.0 | 49.0 | 80 | 983  |
| 1986 | 9  | 16 | 6  | 5 | EARL      | 28.7 | 48.5 | 80 | 983  |
| 1986 | 9  | 16 | 12 | 5 | EARL      | 29.1 | 48.9 | 75 | 984  |
| 1986 | 9  | 16 | 18 | 5 | EARL      | 29.5 | 49.3 | 75 | 984  |
| 1986 | 9  | 17 | 0  | 5 | EARL      | 29.9 | 49.9 | 75 | 985  |
| 1986 | 9  | 17 | 6  | 5 | EARL      | 30.6 | 50.3 | 70 | 985  |
| 1986 | 9  | 17 | 12 | 5 | EARL      | 31.4 | 50.9 | 70 | 986  |
| 1986 | 9  | 17 | 18 | 5 | EARL      | 32.6 | 50.7 | 70 | 986  |
| 1986 | 9  | 18 | 0  | 5 | EARL      | 34.0 | 50.4 | 70 | 987  |
| 1986 | 9  | 18 | 6  | 5 | EARL      | 36.0 | 49.6 | 65 | 988  |
| 1986 | 9  | 18 | 12 | 5 | EARL      | 38.3 | 48.4 | 65 | 989  |
| 1986 | 9  | 18 | 18 | 5 | EARL      | 41.0 | 47.5 | 65 | 990  |
| 1986 | 9  | 19 | 0  | 5 | EARL      | 43.5 | 46.3 | 60 | 992  |
| 1986 | 9  | 19 | 6  | 5 | EARL      | 46.2 | 44.8 | 60 | 993  |
| 1986 | 9  | 19 | 12 | 5 | EARL      | 49.0 | 42.0 | 55 | 995  |
| 1986 | 9  | 19 | 18 | 5 | EARL      | 52.0 | 39.5 | 55 | 996  |
| 1986 | 9  | 20 | 0  | 5 | EARL      | 56.0 | 34.0 | 55 | 997  |
| 1986 | 11 | 18 | 18 | 6 | FRANCES   | 22.8 | 62.8 | 30 | 1009 |
| 1986 | 11 | 19 | 0  | 6 | FRANCES   | 23.5 | 62.9 | 30 | 1008 |
| 1986 | 11 | 19 | 6  | 6 | FRANCES   | 23.9 | 62.9 | 35 | 1007 |
| 1986 | 11 | 19 | 12 | 6 | FRANCES   | 24.4 | 62.8 | 40 | 1006 |
| 1986 | 11 | 19 | 18 | 6 | FRANCES   | 24.8 | 62.7 | 50 | 1004 |
| 1986 | 11 | 20 | 0  | 6 | FRANCES   | 25.8 | 62.1 | 55 | 1002 |
| 1986 | 11 | 20 | 6  | 6 | FRANCES   | 27.0 | 61.0 | 65 | 1001 |
| 1986 | 11 | 20 | 12 | 6 | FRANCES   | 27.8 | 59.6 | 75 | 1000 |
| 1986 | 11 | 20 | 18 | 6 | FRANCES   | 28.5 | 58.7 | 75 | 1000 |
| 1986 | 11 | 21 | 0  | 6 | FRANCES   | 29.1 | 58.2 | 70 | 1001 |
| 1986 | 11 | 21 | 6  | 6 | FRANCES   | 29.7 | 58.0 | 65 | 1002 |
| 1986 | 11 | 21 | 12 | 6 | FRANCES   | 30.4 | 57.9 | 55 | 1003 |
| 1986 | 11 | 21 | 18 | 6 | FRANCES   | 31.1 | 57.9 | 45 | 1005 |
| 1987 | 8  | 9  | 12 | 1 | NOT NAMED | 26.3 | 93.6 | 30 | 1010 |
| 1987 | 8  | 9  | 18 | 1 | NOT NAMED | 27.3 | 94.0 | 35 | 1008 |
| 1987 | 8  | 10 | 0  | 1 | NOT NAMED | 28.4 | 94.4 | 40 | 1008 |
| 1987 | 8  | 10 | 6  | 1 | NOT NAMED | 29.5 | 94.5 | 40 | 1009 |
| 1987 | 8  | 10 | 12 | 1 | NOT NAMED | 30.5 | 94.5 | 40 | 1009 |
| 1987 | 8  | 10 | 18 | 1 | NOT NAMED | 31.3 | 94.1 | 30 | 1009 |
| 1987 | 8  | 11 | 0  | 1 | NOT NAMED | 31.8 | 93.5 | 25 | 1009 |
| 1987 | 8  | 11 | 6  | 1 | NOT NAMED | 32.3 | 92.7 | 25 | 1009 |
| 1987 | 8  | 11 | 12 | 1 | NOT NAMED | 32.3 | 91.8 | 25 | 1008 |
| 1987 | 8  | 11 | 18 | 1 | NOT NAMED | 32.2 | 91.2 | 25 | 1008 |

|      |      |    |             |      |      |         |
|------|------|----|-------------|------|------|---------|
| 1987 | 8 12 | 0  | 1 NOT NAMED | 32.1 | 90.6 | 25 1007 |
| 1987 | 8 12 | 6  | 1 NOT NAMED | 32.0 | 90.2 | 25 1007 |
| 1987 | 8 12 | 12 | 1 NOT NAMED | 32.0 | 89.7 | 25 1007 |
| 1987 | 8 12 | 18 | 1 NOT NAMED | 32.0 | 89.3 | 20 1007 |
| 1987 | 8 13 | 0  | 1 NOT NAMED | 31.9 | 88.8 | 20 1008 |
| 1987 | 8 13 | 6  | 1 NOT NAMED | 31.8 | 88.4 | 20 1008 |
| 1987 | 8 13 | 12 | 1 NOT NAMED | 31.7 | 88.0 | 20 1009 |
| 1987 | 8 13 | 18 | 1 NOT NAMED | 31.5 | 87.7 | 15 1009 |
| 1987 | 8 14 | 0  | 1 NOT NAMED | 31.3 | 87.4 | 15 1010 |
| 1987 | 8 14 | 6  | 1 NOT NAMED | 31.1 | 87.1 | 15 1010 |
| 1987 | 8 14 | 12 | 1 NOT NAMED | 30.8 | 86.8 | 15 1010 |
| 1987 | 8 14 | 18 | 1 NOT NAMED | 30.6 | 86.6 | 15 1011 |
| 1987 | 8 15 | 0  | 1 NOT NAMED | 30.3 | 86.3 | 15 1011 |
| 1987 | 8 15 | 6  | 1 NOT NAMED | 30.0 | 86.0 | 15 1011 |
| 1987 | 8 15 | 12 | 1 NOT NAMED | 29.8 | 85.6 | 15 1012 |
| 1987 | 8 15 | 18 | 1 NOT NAMED | 29.7 | 85.0 | 15 1012 |
| 1987 | 8 16 | 0  | 1 NOT NAMED | 29.8 | 84.5 | 15 1013 |
| 1987 | 8 16 | 6  | 1 NOT NAMED | 30.2 | 84.0 | 15 1014 |
| 1987 | 8 16 | 12 | 1 NOT NAMED | 30.5 | 83.7 | 15 1014 |
| 1987 | 8 16 | 18 | 1 NOT NAMED | 30.9 | 83.2 | 10 1014 |
| 1987 | 8 17 | 0  | 1 NOT NAMED | 31.4 | 82.9 | 10 1015 |
| 1987 | 8 17 | 6  | 1 NOT NAMED | 31.8 | 82.3 | 10 1015 |
| 1987 | 8 8  | 0  | 2 ARLENE    | 34.3 | 77.5 | 10 1016 |
| 1987 | 8 8  | 6  | 2 ARLENE    | 33.8 | 76.7 | 10 1016 |
| 1987 | 8 8  | 12 | 2 ARLENE    | 33.0 | 76.0 | 10 1015 |
| 1987 | 8 8  | 18 | 2 ARLENE    | 32.0 | 75.6 | 10 1015 |
| 1987 | 8 9  | 0  | 2 ARLENE    | 31.0 | 75.2 | 10 1014 |
| 1987 | 8 9  | 6  | 2 ARLENE    | 30.0 | 75.0 | 10 1014 |
| 1987 | 8 9  | 12 | 2 ARLENE    | 29.0 | 75.1 | 15 1013 |
| 1987 | 8 9  | 18 | 2 ARLENE    | 28.1 | 75.4 | 15 1012 |
| 1987 | 8 10 | 0  | 2 ARLENE    | 27.2 | 75.8 | 15 1011 |
| 1987 | 8 10 | 6  | 2 ARLENE    | 26.3 | 76.3 | 20 1010 |
| 1987 | 8 10 | 12 | 2 ARLENE    | 25.5 | 76.9 | 20 1009 |
| 1987 | 8 10 | 18 | 2 ARLENE    | 25.0 | 78.0 | 25 1009 |
| 1987 | 8 11 | 0  | 2 ARLENE    | 26.2 | 78.2 | 25 1009 |
| 1987 | 8 11 | 6  | 2 ARLENE    | 27.2 | 77.2 | 25 1008 |
| 1987 | 8 11 | 12 | 2 ARLENE    | 28.3 | 75.7 | 25 1008 |
| 1987 | 8 11 | 18 | 2 ARLENE    | 29.4 | 74.4 | 35 1006 |
| 1987 | 8 12 | 0  | 2 ARLENE    | 30.7 | 73.2 | 40 1002 |
| 1987 | 8 12 | 6  | 2 ARLENE    | 31.4 | 72.3 | 40 1001 |
| 1987 | 8 12 | 12 | 2 ARLENE    | 32.0 | 71.0 | 45 1000 |
| 1987 | 8 12 | 18 | 2 ARLENE    | 32.4 | 69.7 | 45 999  |
| 1987 | 8 13 | 0  | 2 ARLENE    | 32.6 | 68.3 | 55 997  |
| 1987 | 8 13 | 6  | 2 ARLENE    | 32.9 | 67.0 | 55 997  |

|      |         |          |      |      |    |      |
|------|---------|----------|------|------|----|------|
| 1987 | 8 13 12 | 2 ARLENE | 33.0 | 65.5 | 55 | 998  |
| 1987 | 8 13 18 | 2 ARLENE | 33.0 | 64.5 | 55 | 999  |
| 1987 | 8 14 0  | 2 ARLENE | 33.0 | 63.6 | 50 | 1002 |
| 1987 | 8 14 6  | 2 ARLENE | 32.9 | 62.8 | 45 | 1003 |
| 1987 | 8 14 12 | 2 ARLENE | 32.8 | 62.3 | 50 | 996  |
| 1987 | 8 14 18 | 2 ARLENE | 32.6 | 61.8 | 55 | 994  |
| 1987 | 8 15 0  | 2 ARLENE | 32.4 | 61.3 | 55 | 994  |
| 1987 | 8 15 6  | 2 ARLENE | 32.2 | 60.8 | 55 | 995  |
| 1987 | 8 15 12 | 2 ARLENE | 31.7 | 60.3 | 50 | 996  |
| 1987 | 8 15 18 | 2 ARLENE | 31.3 | 60.0 | 45 | 998  |
| 1987 | 8 16 0  | 2 ARLENE | 30.9 | 59.6 | 45 | 999  |
| 1987 | 8 16 6  | 2 ARLENE | 30.5 | 59.3 | 45 | 1000 |
| 1987 | 8 16 12 | 2 ARLENE | 30.2 | 59.0 | 45 | 1000 |
| 1987 | 8 16 18 | 2 ARLENE | 29.9 | 58.7 | 45 | 1000 |
| 1987 | 8 17 0  | 2 ARLENE | 29.8 | 58.2 | 45 | 1000 |
| 1987 | 8 17 6  | 2 ARLENE | 29.8 | 57.8 | 45 | 1001 |
| 1987 | 8 17 12 | 2 ARLENE | 29.9 | 57.3 | 40 | 1002 |
| 1987 | 8 17 18 | 2 ARLENE | 30.2 | 56.8 | 40 | 1003 |
| 1987 | 8 18 0  | 2 ARLENE | 30.9 | 56.2 | 35 | 1004 |
| 1987 | 8 18 6  | 2 ARLENE | 31.5 | 55.7 | 35 | 1005 |
| 1987 | 8 18 12 | 2 ARLENE | 32.4 | 54.7 | 35 | 1005 |
| 1987 | 8 18 18 | 2 ARLENE | 33.3 | 53.5 | 35 | 1005 |
| 1987 | 8 19 0  | 2 ARLENE | 34.0 | 52.2 | 35 | 1005 |
| 1987 | 8 19 6  | 2 ARLENE | 34.8 | 50.8 | 35 | 1005 |
| 1987 | 8 19 12 | 2 ARLENE | 35.4 | 49.5 | 35 | 1005 |
| 1987 | 8 19 18 | 2 ARLENE | 35.5 | 47.5 | 35 | 1005 |
| 1987 | 8 20 0  | 2 ARLENE | 35.0 | 46.0 | 35 | 1004 |
| 1987 | 8 20 6  | 2 ARLENE | 34.5 | 44.5 | 40 | 1002 |
| 1987 | 8 20 12 | 2 ARLENE | 34.0 | 43.5 | 40 | 1000 |
| 1987 | 8 20 18 | 2 ARLENE | 33.8 | 43.0 | 50 | 997  |
| 1987 | 8 21 0  | 2 ARLENE | 33.7 | 42.7 | 55 | 995  |
| 1987 | 8 21 6  | 2 ARLENE | 33.6 | 42.3 | 55 | 994  |
| 1987 | 8 21 12 | 2 ARLENE | 33.5 | 42.0 | 55 | 993  |
| 1987 | 8 21 18 | 2 ARLENE | 34.5 | 42.5 | 60 | 991  |
| 1987 | 8 22 0  | 2 ARLENE | 35.5 | 43.0 | 60 | 989  |
| 1987 | 8 22 6  | 2 ARLENE | 36.5 | 43.0 | 65 | 988  |
| 1987 | 8 22 12 | 2 ARLENE | 38.0 | 43.0 | 65 | 987  |
| 1987 | 8 22 18 | 2 ARLENE | 39.5 | 42.5 | 65 | 987  |
| 1987 | 8 23 0  | 2 ARLENE | 41.5 | 41.0 | 65 | 987  |
| 1987 | 8 23 6  | 2 ARLENE | 44.0 | 39.0 | 65 | 987  |
| 1987 | 8 23 12 | 2 ARLENE | 46.5 | 36.5 | 65 | 988  |
| 1987 | 8 23 18 | 2 ARLENE | 48.5 | 33.0 | 65 | 988  |
| 1987 | 8 24 0  | 2 ARLENE | 50.0 | 30.0 | 60 | 989  |
| 1987 | 8 24 6  | 2 ARLENE | 50.5 | 27.0 | 60 | 991  |

|      |         |          |      |      |    |      |
|------|---------|----------|------|------|----|------|
| 1987 | 8 24 12 | 2 ARLENE | 50.5 | 23.5 | 60 | 992  |
| 1987 | 8 24 18 | 2 ARLENE | 50.0 | 20.0 | 55 | 995  |
| 1987 | 8 25 0  | 2 ARLENE | 48.0 | 18.0 | 50 | 998  |
| 1987 | 8 25 6  | 2 ARLENE | 46.0 | 17.0 | 45 | 1002 |
| 1987 | 8 25 12 | 2 ARLENE | 44.0 | 16.5 | 35 | 1006 |
| 1987 | 8 25 18 | 2 ARLENE | 43.0 | 15.0 | 25 | 1009 |
| 1987 | 8 26 0  | 2 ARLENE | 41.5 | 14.5 | 20 | 1010 |
| 1987 | 8 26 6  | 2 ARLENE | 39.5 | 14.0 | 15 | 1011 |
| 1987 | 8 26 12 | 2 ARLENE | 37.5 | 11.5 | 10 | 1010 |
| 1987 | 8 26 18 | 2 ARLENE | 39.0 | 8.0  | 10 | 1009 |
| 1987 | 8 27 0  | 2 ARLENE | 39.0 | 6.0  | 15 | 1008 |
| 1987 | 8 27 6  | 2 ARLENE | 39.0 | 5.0  | 15 | 1008 |
| 1987 | 8 27 12 | 2 ARLENE | 39.0 | 4.5  | 15 | 1008 |
| 1987 | 8 27 18 | 2 ARLENE | 39.0 | 4.0  | 10 | 1008 |
| 1987 | 8 28 0  | 2 ARLENE | 39.0 | 4.0  | 10 | 1009 |
| 1987 | 8 18 0  | 3 BRET   | 14.8 | 20.0 | 25 | 1011 |
| 1987 | 8 18 6  | 3 BRET   | 14.9 | 22.0 | 25 | 1010 |
| 1987 | 8 18 12 | 3 BRET   | 15.0 | 24.0 | 30 | 1008 |
| 1987 | 8 18 18 | 3 BRET   | 15.1 | 26.0 | 35 | 1004 |
| 1987 | 8 19 0  | 3 BRET   | 15.2 | 27.9 | 35 | 1004 |
| 1987 | 8 19 6  | 3 BRET   | 15.3 | 29.5 | 35 | 1004 |
| 1987 | 8 19 12 | 3 BRET   | 15.4 | 31.0 | 35 | 1004 |
| 1987 | 8 19 18 | 3 BRET   | 15.5 | 32.4 | 40 | 1002 |
| 1987 | 8 20 0  | 3 BRET   | 15.6 | 34.0 | 40 | 1002 |
| 1987 | 8 20 6  | 3 BRET   | 15.7 | 35.5 | 45 | 1000 |
| 1987 | 8 20 12 | 3 BRET   | 15.8 | 37.0 | 45 | 1000 |
| 1987 | 8 20 18 | 3 BRET   | 15.9 | 38.4 | 45 | 1000 |
| 1987 | 8 21 0  | 3 BRET   | 16.0 | 39.8 | 40 | 1002 |
| 1987 | 8 21 6  | 3 BRET   | 16.4 | 41.0 | 40 | 1002 |
| 1987 | 8 21 12 | 3 BRET   | 16.9 | 42.5 | 35 | 1005 |
| 1987 | 8 21 18 | 3 BRET   | 17.1 | 43.9 | 35 | 1005 |
| 1987 | 8 22 0  | 3 BRET   | 17.5 | 45.0 | 35 | 1005 |
| 1987 | 8 22 6  | 3 BRET   | 17.8 | 46.1 | 35 | 1005 |
| 1987 | 8 22 12 | 3 BRET   | 18.1 | 47.2 | 35 | 1007 |
| 1987 | 8 22 18 | 3 BRET   | 18.4 | 48.3 | 30 | 1009 |
| 1987 | 8 23 0  | 3 BRET   | 19.0 | 49.4 | 30 | 1009 |
| 1987 | 8 23 6  | 3 BRET   | 19.8 | 50.3 | 30 | 1009 |
| 1987 | 8 23 12 | 3 BRET   | 20.5 | 51.3 | 25 | 1011 |
| 1987 | 8 23 18 | 3 BRET   | 21.4 | 52.5 | 25 | 1011 |
| 1987 | 8 24 0  | 3 BRET   | 22.2 | 53.8 | 25 | 1011 |
| 1987 | 8 24 6  | 3 BRET   | 23.8 | 54.5 | 25 | 1011 |
| 1987 | 9 5 12  | 4 CINDY  | 15.2 | 31.3 | 25 | 1011 |
| 1987 | 9 5 18  | 4 CINDY  | 16.0 | 32.2 | 30 | 1009 |
| 1987 | 9 6 0   | 4 CINDY  | 16.9 | 33.1 | 30 | 1009 |

|      |   |    |    |   |        |      |      |    |      |
|------|---|----|----|---|--------|------|------|----|------|
| 1987 | 9 | 6  | 6  | 4 | CINDY  | 18.0 | 34.2 | 30 | 1009 |
| 1987 | 9 | 6  | 12 | 4 | CINDY  | 18.9 | 35.3 | 30 | 1009 |
| 1987 | 9 | 6  | 18 | 4 | CINDY  | 20.0 | 36.6 | 30 | 1009 |
| 1987 | 9 | 7  | 0  | 4 | CINDY  | 21.3 | 37.8 | 30 | 1009 |
| 1987 | 9 | 7  | 6  | 4 | CINDY  | 22.9 | 38.6 | 30 | 1008 |
| 1987 | 9 | 7  | 12 | 4 | CINDY  | 24.6 | 39.3 | 35 | 1007 |
| 1987 | 9 | 7  | 18 | 4 | CINDY  | 26.4 | 39.3 | 40 | 1003 |
| 1987 | 9 | 8  | 0  | 4 | CINDY  | 28.2 | 39.4 | 45 | 1000 |
| 1987 | 9 | 8  | 6  | 4 | CINDY  | 30.0 | 39.5 | 45 | 1000 |
| 1987 | 9 | 8  | 12 | 4 | CINDY  | 31.1 | 39.5 | 45 | 1000 |
| 1987 | 9 | 8  | 18 | 4 | CINDY  | 32.2 | 39.4 | 40 | 1003 |
| 1987 | 9 | 9  | 0  | 4 | CINDY  | 33.3 | 39.3 | 35 | 1005 |
| 1987 | 9 | 9  | 6  | 4 | CINDY  | 34.4 | 39.0 | 35 | 1005 |
| 1987 | 9 | 9  | 12 | 4 | CINDY  | 35.7 | 37.9 | 35 | 1007 |
| 1987 | 9 | 9  | 18 | 4 | CINDY  | 37.0 | 36.5 | 35 | 1007 |
| 1987 | 9 | 10 | 0  | 4 | CINDY  | 38.1 | 34.9 | 35 | 1007 |
| 1987 | 9 | 10 | 6  | 4 | CINDY  | 39.7 | 32.6 | 35 | 1007 |
| 1987 | 9 | 10 | 12 | 4 | CINDY  | 41.0 | 30.5 | 35 | 1007 |
| 1987 | 9 | 10 | 18 | 4 | CINDY  | 42.5 | 28.0 | 35 | 1005 |
| 1987 | 9 | 8  | 18 | 5 | DENNIS | 10.8 | 18.4 | 25 | 1012 |
| 1987 | 9 | 9  | 0  | 5 | DENNIS | 10.9 | 19.5 | 25 | 1011 |
| 1987 | 9 | 9  | 6  | 5 | DENNIS | 10.9 | 20.7 | 25 | 1011 |
| 1987 | 9 | 9  | 12 | 5 | DENNIS | 10.9 | 21.9 | 25 | 1011 |
| 1987 | 9 | 9  | 18 | 5 | DENNIS | 10.8 | 23.0 | 30 | 1011 |
| 1987 | 9 | 10 | 0  | 5 | DENNIS | 10.7 | 23.6 | 30 | 1011 |
| 1987 | 9 | 10 | 6  | 5 | DENNIS | 10.7 | 24.3 | 30 | 1009 |
| 1987 | 9 | 10 | 12 | 5 | DENNIS | 10.8 | 25.0 | 35 | 1008 |
| 1987 | 9 | 10 | 18 | 5 | DENNIS | 10.9 | 25.7 | 35 | 1005 |
| 1987 | 9 | 11 | 0  | 5 | DENNIS | 11.3 | 26.3 | 40 | 1003 |
| 1987 | 9 | 11 | 6  | 5 | DENNIS | 11.8 | 27.0 | 40 | 1002 |
| 1987 | 9 | 11 | 12 | 5 | DENNIS | 12.3 | 27.7 | 45 | 1001 |
| 1987 | 9 | 11 | 18 | 5 | DENNIS | 12.8 | 28.5 | 45 | 1000 |
| 1987 | 9 | 12 | 0  | 5 | DENNIS | 13.2 | 29.5 | 45 | 1000 |
| 1987 | 9 | 12 | 6  | 5 | DENNIS | 13.5 | 30.5 | 40 | 1001 |
| 1987 | 9 | 12 | 12 | 5 | DENNIS | 13.8 | 31.5 | 40 | 1002 |
| 1987 | 9 | 12 | 18 | 5 | DENNIS | 14.2 | 32.5 | 35 | 1004 |
| 1987 | 9 | 13 | 0  | 5 | DENNIS | 14.6 | 33.2 | 35 | 1005 |
| 1987 | 9 | 13 | 6  | 5 | DENNIS | 15.1 | 33.9 | 35 | 1005 |
| 1987 | 9 | 13 | 12 | 5 | DENNIS | 15.5 | 34.6 | 35 | 1005 |
| 1987 | 9 | 13 | 18 | 5 | DENNIS | 15.9 | 35.4 | 35 | 1005 |
| 1987 | 9 | 14 | 0  | 5 | DENNIS | 16.3 | 36.7 | 35 | 1005 |
| 1987 | 9 | 14 | 6  | 5 | DENNIS | 16.8 | 37.9 | 35 | 1005 |
| 1987 | 9 | 14 | 12 | 5 | DENNIS | 17.2 | 39.2 | 35 | 1005 |
| 1987 | 9 | 14 | 18 | 5 | DENNIS | 17.7 | 40.5 | 35 | 1005 |

|      |      |    |          |      |      |         |
|------|------|----|----------|------|------|---------|
| 1987 | 9 15 | 0  | 5 DENNIS | 17.8 | 41.5 | 35 1005 |
| 1987 | 9 15 | 6  | 5 DENNIS | 17.8 | 42.4 | 35 1005 |
| 1987 | 9 15 | 12 | 5 DENNIS | 17.7 | 43.4 | 35 1005 |
| 1987 | 9 15 | 18 | 5 DENNIS | 17.6 | 44.4 | 35 1005 |
| 1987 | 9 16 | 0  | 5 DENNIS | 17.5 | 45.1 | 35 1005 |
| 1987 | 9 16 | 6  | 5 DENNIS | 17.5 | 45.7 | 35 1005 |
| 1987 | 9 16 | 12 | 5 DENNIS | 17.6 | 46.3 | 35 1005 |
| 1987 | 9 16 | 18 | 5 DENNIS | 17.6 | 46.9 | 35 1005 |
| 1987 | 9 17 | 0  | 5 DENNIS | 17.7 | 47.7 | 35 1005 |
| 1987 | 9 17 | 6  | 5 DENNIS | 17.8 | 48.4 | 35 1005 |
| 1987 | 9 17 | 12 | 5 DENNIS | 17.8 | 49.1 | 35 1006 |
| 1987 | 9 17 | 18 | 5 DENNIS | 17.9 | 49.9 | 35 1006 |
| 1987 | 9 18 | 0  | 5 DENNIS | 18.1 | 51.1 | 30 1007 |
| 1987 | 9 18 | 6  | 5 DENNIS | 18.5 | 52.1 | 30 1009 |
| 1987 | 9 18 | 12 | 5 DENNIS | 20.8 | 53.0 | 30 1010 |
| 1987 | 9 18 | 18 | 5 DENNIS | 23.2 | 53.8 | 30 1011 |
| 1987 | 9 19 | 0  | 5 DENNIS | 24.5 | 54.8 | 30 1012 |
| 1987 | 9 19 | 6  | 5 DENNIS | 25.7 | 55.7 | 30 1012 |
| 1987 | 9 19 | 12 | 5 DENNIS | 27.0 | 56.8 | 25 1012 |
| 1987 | 9 19 | 18 | 5 DENNIS | 28.5 | 57.4 | 25 1012 |
| 1987 | 9 20 | 0  | 5 DENNIS | 30.2 | 56.0 | 25 1012 |
| 1987 | 9 20 | 6  | 5 DENNIS | 31.3 | 54.0 | 25 1012 |
| 1987 | 9 20 | 12 | 5 DENNIS | 32.1 | 51.7 | 25 1012 |
| 1987 | 9 20 | 18 | 5 DENNIS | 32.8 | 49.5 | 25 1012 |
| 1987 | 9 20 | 0  | 6 EMILY  | 9.8  | 51.3 | 25 1008 |
| 1987 | 9 20 | 6  | 6 EMILY  | 10.4 | 53.0 | 25 1007 |
| 1987 | 9 20 | 12 | 6 EMILY  | 10.9 | 54.7 | 30 1006 |
| 1987 | 9 20 | 18 | 6 EMILY  | 11.4 | 56.4 | 35 1005 |
| 1987 | 9 21 | 0  | 6 EMILY  | 12.0 | 58.0 | 40 1004 |
| 1987 | 9 21 | 6  | 6 EMILY  | 12.4 | 59.7 | 40 1004 |
| 1987 | 9 21 | 12 | 6 EMILY  | 13.1 | 61.3 | 45 1004 |
| 1987 | 9 21 | 18 | 6 EMILY  | 13.7 | 63.1 | 50 1002 |
| 1987 | 9 22 | 0  | 6 EMILY  | 14.5 | 64.7 | 60 992  |
| 1987 | 9 22 | 6  | 6 EMILY  | 15.1 | 66.3 | 80 978  |
| 1987 | 9 22 | 12 | 6 EMILY  | 15.9 | 67.7 | 90 971  |
| 1987 | 9 22 | 18 | 6 EMILY  | 16.7 | 69.1 | 110 958 |
| 1987 | 9 23 | 0  | 6 EMILY  | 17.8 | 70.4 | 105 960 |
| 1987 | 9 23 | 6  | 6 EMILY  | 19.0 | 71.5 | 70 984  |
| 1987 | 9 23 | 12 | 6 EMILY  | 20.0 | 72.3 | 55 1004 |
| 1987 | 9 23 | 18 | 6 EMILY  | 20.9 | 72.8 | 40 1003 |
| 1987 | 9 24 | 0  | 6 EMILY  | 22.0 | 73.0 | 40 1000 |
| 1987 | 9 24 | 6  | 6 EMILY  | 23.2 | 73.0 | 45 1001 |
| 1987 | 9 24 | 12 | 6 EMILY  | 24.4 | 72.7 | 45 1002 |
| 1987 | 9 24 | 18 | 6 EMILY  | 26.0 | 72.0 | 45 1002 |

|      |    |    |    |   |         |      |      |    |      |
|------|----|----|----|---|---------|------|------|----|------|
| 1987 | 9  | 25 | 0  | 6 | EMILY   | 28.0 | 70.5 | 45 | 999  |
| 1987 | 9  | 25 | 6  | 6 | EMILY   | 30.2 | 68.0 | 70 | 985  |
| 1987 | 9  | 25 | 12 | 6 | EMILY   | 32.4 | 64.6 | 80 | 974  |
| 1987 | 9  | 25 | 18 | 6 | EMILY   | 35.0 | 60.0 | 80 | 974  |
| 1987 | 9  | 26 | 0  | 6 | EMILY   | 38.0 | 55.0 | 75 | 976  |
| 1987 | 9  | 26 | 6  | 6 | EMILY   | 41.2 | 49.0 | 70 | 979  |
| 1987 | 9  | 26 | 12 | 6 | EMILY   | 44.8 | 42.5 | 65 | 983  |
| 1987 | 9  | 26 | 18 | 6 | EMILY   | 49.0 | 36.0 | 55 | 994  |
| 1987 | 10 | 9  | 6  | 7 | FLOYD   | 15.0 | 82.6 | 25 | 1004 |
| 1987 | 10 | 9  | 12 | 7 | FLOYD   | 14.5 | 82.5 | 25 | 1003 |
| 1987 | 10 | 9  | 18 | 7 | FLOYD   | 14.1 | 82.1 | 25 | 1001 |
| 1987 | 10 | 10 | 0  | 7 | FLOYD   | 14.4 | 81.8 | 25 | 999  |
| 1987 | 10 | 10 | 6  | 7 | FLOYD   | 15.3 | 82.2 | 30 | 999  |
| 1987 | 10 | 10 | 12 | 7 | FLOYD   | 16.0 | 82.2 | 35 | 999  |
| 1987 | 10 | 10 | 18 | 7 | FLOYD   | 16.8 | 83.5 | 35 | 999  |
| 1987 | 10 | 11 | 0  | 7 | FLOYD   | 17.6 | 83.9 | 40 | 999  |
| 1987 | 10 | 11 | 6  | 7 | FLOYD   | 18.4 | 84.2 | 40 | 998  |
| 1987 | 10 | 11 | 12 | 7 | FLOYD   | 19.4 | 84.5 | 45 | 997  |
| 1987 | 10 | 11 | 18 | 7 | FLOYD   | 20.5 | 84.5 | 50 | 996  |
| 1987 | 10 | 12 | 0  | 7 | FLOYD   | 21.7 | 84.3 | 55 | 995  |
| 1987 | 10 | 12 | 6  | 7 | FLOYD   | 23.0 | 84.0 | 60 | 994  |
| 1987 | 10 | 12 | 12 | 7 | FLOYD   | 24.0 | 82.9 | 65 | 993  |
| 1987 | 10 | 12 | 18 | 7 | FLOYD   | 24.7 | 81.5 | 65 | 993  |
| 1987 | 10 | 13 | 0  | 7 | FLOYD   | 25.3 | 79.9 | 60 | 993  |
| 1987 | 10 | 13 | 6  | 7 | FLOYD   | 26.0 | 78.3 | 50 | 994  |
| 1987 | 10 | 13 | 12 | 7 | FLOYD   | 27.0 | 76.9 | 45 | 996  |
| 1987 | 10 | 13 | 18 | 7 | FLOYD   | 28.1 | 75.4 | 40 | 997  |
| 1987 | 10 | 14 | 0  | 7 | FLOYD   | 29.5 | 74.0 | 40 | 998  |
| 1988 | 8  | 5  | 18 | 1 | ALBERTO | 32.0 | 77.5 | 20 | 1015 |
| 1988 | 8  | 6  | 0  | 1 | ALBERTO | 32.8 | 76.2 | 20 | 1014 |
| 1988 | 8  | 6  | 6  | 1 | ALBERTO | 34.0 | 75.2 | 20 | 1013 |
| 1988 | 8  | 6  | 12 | 1 | ALBERTO | 35.2 | 74.6 | 25 | 1012 |
| 1988 | 8  | 6  | 18 | 1 | ALBERTO | 37.0 | 73.5 | 25 | 1011 |
| 1988 | 8  | 7  | 0  | 1 | ALBERTO | 38.7 | 72.4 | 25 | 1009 |
| 1988 | 8  | 7  | 6  | 1 | ALBERTO | 40.0 | 70.8 | 30 | 1006 |
| 1988 | 8  | 7  | 12 | 1 | ALBERTO | 41.5 | 69.0 | 35 | 1002 |
| 1988 | 8  | 7  | 18 | 1 | ALBERTO | 43.0 | 67.5 | 35 | 1002 |
| 1988 | 8  | 8  | 0  | 1 | ALBERTO | 45.0 | 65.5 | 35 | 1004 |
| 1988 | 8  | 8  | 6  | 1 | ALBERTO | 47.0 | 63.0 | 35 | 1006 |
| 1988 | 8  | 8  | 12 | 1 | ALBERTO | 49.0 | 60.0 | 30 | 1008 |
| 1988 | 8  | 8  | 18 | 1 | ALBERTO | 51.0 | 56.0 | 25 | 1010 |
| 1988 | 8  | 8  | 0  | 2 | BERYL   | 30.4 | 90.3 | 25 | 1010 |
| 1988 | 8  | 8  | 6  | 2 | BERYL   | 29.7 | 89.7 | 30 | 1009 |
| 1988 | 8  | 8  | 12 | 2 | BERYL   | 29.7 | 89.4 | 35 | 1007 |

|      |   |    |    |   |       |      |      |    |      |
|------|---|----|----|---|-------|------|------|----|------|
| 1988 | 8 | 8  | 18 | 2 | BERYL | 29.4 | 89.2 | 40 | 1005 |
| 1988 | 8 | 9  | 0  | 2 | BERYL | 29.3 | 89.1 | 45 | 1002 |
| 1988 | 8 | 9  | 6  | 2 | BERYL | 29.6 | 89.5 | 45 | 1001 |
| 1988 | 8 | 9  | 12 | 2 | BERYL | 30.1 | 90.4 | 45 | 1002 |
| 1988 | 8 | 9  | 18 | 2 | BERYL | 30.1 | 90.9 | 40 | 1005 |
| 1988 | 8 | 10 | 0  | 2 | BERYL | 30.3 | 91.6 | 30 | 1006 |
| 1988 | 8 | 10 | 6  | 2 | BERYL | 30.7 | 92.2 | 30 | 1007 |
| 1988 | 8 | 10 | 12 | 2 | BERYL | 31.2 | 92.6 | 25 | 1008 |
| 1988 | 8 | 10 | 18 | 2 | BERYL | 31.7 | 93.2 | 20 | 1011 |
| 1988 | 8 | 21 | 12 | 3 | CHRIS | 14.9 | 43.3 | 25 | 1009 |
| 1988 | 8 | 21 | 18 | 3 | CHRIS | 14.6 | 45.7 | 25 | 1009 |
| 1988 | 8 | 22 | 0  | 3 | CHRIS | 14.6 | 47.8 | 25 | 1009 |
| 1988 | 8 | 22 | 6  | 3 | CHRIS | 14.7 | 49.9 | 25 | 1009 |
| 1988 | 8 | 22 | 12 | 3 | CHRIS | 14.8 | 51.9 | 30 | 1009 |
| 1988 | 8 | 22 | 18 | 3 | CHRIS | 15.1 | 54.0 | 30 | 1009 |
| 1988 | 8 | 23 | 0  | 3 | CHRIS | 15.3 | 55.7 | 30 | 1009 |
| 1988 | 8 | 23 | 6  | 3 | CHRIS | 15.6 | 57.5 | 30 | 1009 |
| 1988 | 8 | 23 | 12 | 3 | CHRIS | 16.0 | 59.2 | 30 | 1009 |
| 1988 | 8 | 23 | 18 | 3 | CHRIS | 16.3 | 61.0 | 30 | 1009 |
| 1988 | 8 | 24 | 0  | 3 | CHRIS | 16.7 | 62.4 | 30 | 1009 |
| 1988 | 8 | 24 | 6  | 3 | CHRIS | 16.9 | 63.8 | 30 | 1009 |
| 1988 | 8 | 24 | 12 | 3 | CHRIS | 17.2 | 65.2 | 30 | 1009 |
| 1988 | 8 | 24 | 18 | 3 | CHRIS | 17.5 | 66.7 | 30 | 1009 |
| 1988 | 8 | 25 | 0  | 3 | CHRIS | 17.8 | 67.8 | 30 | 1009 |
| 1988 | 8 | 25 | 6  | 3 | CHRIS | 18.2 | 68.8 | 30 | 1009 |
| 1988 | 8 | 25 | 12 | 3 | CHRIS | 18.5 | 69.8 | 30 | 1008 |
| 1988 | 8 | 25 | 18 | 3 | CHRIS | 19.1 | 70.9 | 30 | 1008 |
| 1988 | 8 | 26 | 0  | 3 | CHRIS | 19.8 | 72.1 | 30 | 1008 |
| 1988 | 8 | 26 | 6  | 3 | CHRIS | 20.5 | 73.2 | 30 | 1008 |
| 1988 | 8 | 26 | 12 | 3 | CHRIS | 21.5 | 74.2 | 30 | 1008 |
| 1988 | 8 | 26 | 18 | 3 | CHRIS | 22.5 | 75.4 | 30 | 1008 |
| 1988 | 8 | 27 | 0  | 3 | CHRIS | 23.3 | 76.2 | 30 | 1008 |
| 1988 | 8 | 27 | 6  | 3 | CHRIS | 24.1 | 77.2 | 30 | 1008 |
| 1988 | 8 | 27 | 12 | 3 | CHRIS | 24.9 | 78.1 | 30 | 1008 |
| 1988 | 8 | 27 | 18 | 3 | CHRIS | 25.8 | 79.0 | 30 | 1008 |
| 1988 | 8 | 28 | 0  | 3 | CHRIS | 26.8 | 79.7 | 30 | 1008 |
| 1988 | 8 | 28 | 6  | 3 | CHRIS | 28.2 | 80.0 | 40 | 1008 |
| 1988 | 8 | 28 | 12 | 3 | CHRIS | 30.8 | 80.8 | 45 | 1005 |
| 1988 | 8 | 28 | 18 | 3 | CHRIS | 32.8 | 81.1 | 35 | 1006 |
| 1988 | 8 | 29 | 0  | 3 | CHRIS | 34.1 | 81.1 | 25 | 1008 |
| 1988 | 8 | 29 | 6  | 3 | CHRIS | 35.8 | 80.6 | 20 | 1009 |
| 1988 | 8 | 29 | 12 | 3 | CHRIS | 37.5 | 79.5 | 20 | 1009 |
| 1988 | 8 | 29 | 18 | 3 | CHRIS | 39.2 | 77.6 | 20 | 1010 |
| 1988 | 8 | 30 | 0  | 3 | CHRIS | 41.2 | 73.6 | 20 | 1008 |



|      |   |    |    |   |         |      |       |    |      |
|------|---|----|----|---|---------|------|-------|----|------|
| 1988 | 8 | 30 | 6  | 3 | CHRIS   | 43.5 | 69.9  | 20 | 1008 |
| 1988 | 8 | 30 | 12 | 3 | CHRIS   | 45.0 | 65.0  | 25 | 1008 |
| 1988 | 8 | 30 | 18 | 3 | CHRIS   | 46.5 | 60.0  | 25 | 1008 |
| 1988 | 8 | 31 | 18 | 4 | DEBBY   | 20.1 | 91.0  | 25 | 1006 |
| 1988 | 9 | 1  | 0  | 4 | DEBBY   | 20.2 | 91.7  | 25 | 1005 |
| 1988 | 9 | 1  | 6  | 4 | DEBBY   | 20.3 | 92.4  | 25 | 1005 |
| 1988 | 9 | 1  | 12 | 4 | DEBBY   | 20.4 | 93.1  | 25 | 1004 |
| 1988 | 9 | 1  | 18 | 4 | DEBBY   | 20.5 | 93.8  | 30 | 1003 |
| 1988 | 9 | 2  | 0  | 4 | DEBBY   | 20.6 | 94.5  | 30 | 1003 |
| 1988 | 9 | 2  | 6  | 4 | DEBBY   | 20.7 | 95.2  | 40 | 1001 |
| 1988 | 9 | 2  | 12 | 4 | DEBBY   | 20.8 | 95.9  | 50 | 998  |
| 1988 | 9 | 2  | 18 | 4 | DEBBY   | 20.8 | 96.6  | 65 | 992  |
| 1988 | 9 | 3  | 0  | 4 | DEBBY   | 20.7 | 97.3  | 65 | 987  |
| 1988 | 9 | 3  | 6  | 4 | DEBBY   | 20.5 | 98.1  | 50 | 995  |
| 1988 | 9 | 3  | 12 | 4 | DEBBY   | 20.3 | 98.9  | 35 | 998  |
| 1988 | 9 | 3  | 18 | 4 | DEBBY   | 20.0 | 99.8  | 30 | 999  |
| 1988 | 9 | 4  | 0  | 4 | DEBBY   | 19.8 | 100.7 | 30 | 1000 |
| 1988 | 9 | 4  | 6  | 4 | DEBBY   | 19.6 | 101.6 | 30 | 1000 |
| 1988 | 9 | 4  | 12 | 4 | DEBBY   | 19.5 | 102.5 | 30 | 1000 |
| 1988 | 9 | 4  | 18 | 4 | DEBBY   | 19.4 | 103.4 | 30 | 1001 |
| 1988 | 9 | 5  | 0  | 4 | DEBBY   | 19.5 | 104.3 | 30 | 1001 |
| 1988 | 9 | 5  | 6  | 4 | DEBBY   | 19.6 | 105.1 | 30 | 1002 |
| 1988 | 9 | 5  | 12 | 4 | DEBBY   | 19.9 | 105.9 | 30 | 1003 |
| 1988 | 9 | 5  | 18 | 4 | DEBBY   | 20.5 | 106.4 | 30 | 1004 |
| 1988 | 9 | 6  | 0  | 4 | DEBBY   | 21.0 | 106.8 | 30 | 1004 |
| 1988 | 9 | 6  | 6  | 4 | DEBBY   | 21.5 | 107.1 | 30 | 1005 |
| 1988 | 9 | 6  | 12 | 4 | DEBBY   | 22.0 | 107.4 | 25 | 1005 |
| 1988 | 9 | 6  | 18 | 4 | DEBBY   | 22.5 | 107.7 | 25 | 1006 |
| 1988 | 9 | 7  | 0  | 4 | DEBBY   | 23.0 | 108.0 | 25 | 1006 |
| 1988 | 9 | 7  | 6  | 4 | DEBBY   | 23.5 | 108.3 | 25 | 1007 |
| 1988 | 9 | 7  | 12 | 4 | DEBBY   | 23.9 | 108.5 | 25 | 1007 |
| 1988 | 9 | 7  | 18 | 4 | DEBBY   | 24.2 | 108.7 | 25 | 1007 |
| 1988 | 9 | 8  | 0  | 4 | DEBBY   | 24.4 | 108.9 | 25 | 1008 |
| 1988 | 9 | 8  | 6  | 4 | DEBBY   | 24.3 | 109.1 | 20 | 1008 |
| 1988 | 9 | 8  | 12 | 4 | DEBBY   | 24.2 | 109.3 | 20 | 1008 |
| 1988 | 9 | 8  | 18 | 4 | DEBBY   | 24.0 | 109.0 | 20 | 1008 |
| 1988 | 9 | 3  | 0  | 5 | ERNESTO | 32.5 | 60.5  | 25 | 1016 |
| 1988 | 9 | 3  | 6  | 5 | ERNESTO | 33.1 | 59.2  | 25 | 1012 |
| 1988 | 9 | 3  | 12 | 5 | ERNESTO | 34.3 | 56.5  | 30 | 1008 |
| 1988 | 9 | 3  | 18 | 5 | ERNESTO | 35.2 | 53.1  | 35 | 1004 |
| 1988 | 9 | 4  | 0  | 5 | ERNESTO | 35.9 | 49.5  | 40 | 1001 |
| 1988 | 9 | 4  | 6  | 5 | ERNESTO | 36.6 | 44.4  | 45 | 999  |
| 1988 | 9 | 4  | 12 | 5 | ERNESTO | 38.0 | 39.5  | 50 | 997  |
| 1988 | 9 | 4  | 18 | 5 | ERNESTO | 40.2 | 35.0  | 50 | 996  |

|      |   |    |    |             |      |      |    |      |
|------|---|----|----|-------------|------|------|----|------|
| 1988 | 9 | 5  | 0  | 5 ERNESTO   | 43.1 | 29.7 | 55 | 994  |
| 1988 | 9 | 7  | 0  | 6 NOT NAMED | 12.5 | 17.5 | 25 | 1011 |
| 1988 | 9 | 7  | 6  | 6 NOT NAMED | 13.1 | 18.0 | 25 | 1011 |
| 1988 | 9 | 7  | 12 | 6 NOT NAMED | 13.8 | 18.5 | 35 | 1008 |
| 1988 | 9 | 7  | 18 | 6 NOT NAMED | 14.8 | 19.0 | 35 | 1007 |
| 1988 | 9 | 8  | 0  | 6 NOT NAMED | 15.3 | 19.1 | 40 | 1005 |
| 1988 | 9 | 8  | 6  | 6 NOT NAMED | 16.4 | 19.8 | 40 | 1003 |
| 1988 | 9 | 8  | 12 | 6 NOT NAMED | 17.5 | 20.5 | 50 | 1002 |
| 1988 | 9 | 8  | 18 | 6 NOT NAMED | 18.8 | 21.0 | 50 | 999  |
| 1988 | 9 | 9  | 0  | 6 NOT NAMED | 19.9 | 21.6 | 50 | 994  |
| 1988 | 9 | 9  | 6  | 6 NOT NAMED | 21.4 | 22.0 | 50 | 996  |
| 1988 | 9 | 9  | 12 | 6 NOT NAMED | 22.9 | 22.5 | 35 | 1005 |
| 1988 | 9 | 9  | 18 | 6 NOT NAMED | 24.0 | 22.5 | 25 | 1006 |
| 1988 | 9 | 10 | 0  | 6 NOT NAMED | 25.0 | 23.0 | 25 | 1009 |
| 1988 | 9 | 7  | 6  | 7 FLORENCE  | 22.8 | 92.0 | 25 | 1000 |
| 1988 | 9 | 7  | 12 | 7 FLORENCE  | 22.8 | 91.2 | 30 | 998  |
| 1988 | 9 | 7  | 18 | 7 FLORENCE  | 22.7 | 90.2 | 40 | 996  |
| 1988 | 9 | 8  | 0  | 7 FLORENCE  | 22.6 | 89.6 | 45 | 993  |
| 1988 | 9 | 8  | 6  | 7 FLORENCE  | 22.7 | 89.8 | 45 | 990  |
| 1988 | 9 | 8  | 12 | 7 FLORENCE  | 23.1 | 89.7 | 45 | 990  |
| 1988 | 9 | 8  | 18 | 7 FLORENCE  | 23.4 | 89.5 | 45 | 992  |
| 1988 | 9 | 9  | 0  | 7 FLORENCE  | 24.2 | 89.2 | 50 | 992  |
| 1988 | 9 | 9  | 6  | 7 FLORENCE  | 25.0 | 89.2 | 50 | 991  |
| 1988 | 9 | 9  | 12 | 7 FLORENCE  | 26.1 | 89.2 | 55 | 998  |
| 1988 | 9 | 9  | 18 | 7 FLORENCE  | 27.4 | 89.2 | 65 | 985  |
| 1988 | 9 | 10 | 0  | 7 FLORENCE  | 28.7 | 89.3 | 70 | 983  |
| 1988 | 9 | 10 | 6  | 7 FLORENCE  | 29.7 | 89.7 | 60 | 988  |
| 1988 | 9 | 10 | 12 | 7 FLORENCE  | 30.7 | 90.7 | 30 | 998  |
| 1988 | 9 | 10 | 18 | 7 FLORENCE  | 31.8 | 91.5 | 20 | 1003 |
| 1988 | 9 | 11 | 0  | 7 FLORENCE  | 32.4 | 92.3 | 15 | 1007 |
| 1988 | 9 | 11 | 6  | 7 FLORENCE  | 32.7 | 93.3 | 15 | 1009 |
| 1988 | 9 | 11 | 12 | 7 FLORENCE  | 33.0 | 94.5 | 15 | 1010 |
| 1988 | 9 | 8  | 18 | 8 GILBERT   | 12.0 | 54.0 | 25 | 1008 |
| 1988 | 9 | 9  | 0  | 8 GILBERT   | 12.7 | 55.6 | 25 | 1007 |
| 1988 | 9 | 9  | 6  | 8 GILBERT   | 13.3 | 57.1 | 30 | 1006 |
| 1988 | 9 | 9  | 12 | 8 GILBERT   | 14.0 | 58.6 | 30 | 1005 |
| 1988 | 9 | 9  | 18 | 8 GILBERT   | 14.5 | 60.1 | 35 | 1004 |
| 1988 | 9 | 10 | 0  | 8 GILBERT   | 14.8 | 61.5 | 40 | 1002 |
| 1988 | 9 | 10 | 6  | 8 GILBERT   | 15.0 | 62.8 | 45 | 998  |
| 1988 | 9 | 10 | 12 | 8 GILBERT   | 15.3 | 64.1 | 50 | 995  |
| 1988 | 9 | 10 | 18 | 8 GILBERT   | 15.7 | 65.4 | 55 | 992  |
| 1988 | 9 | 11 | 0  | 8 GILBERT   | 15.9 | 66.8 | 65 | 989  |
| 1988 | 9 | 11 | 6  | 8 GILBERT   | 16.2 | 68.0 | 80 | 982  |
| 1988 | 9 | 11 | 12 | 8 GILBERT   | 16.1 | 69.5 | 95 | 975  |

|      |         |           |      |       |     |      |
|------|---------|-----------|------|-------|-----|------|
| 1988 | 9 11 18 | 8 GILBERT | 16.2 | 70.7  | 100 | 970  |
| 1988 | 9 12 0  | 8 GILBERT | 16.8 | 72.0  | 105 | 964  |
| 1988 | 9 12 6  | 8 GILBERT | 17.3 | 73.7  | 110 | 962  |
| 1988 | 9 12 12 | 8 GILBERT | 17.6 | 75.3  | 110 | 960  |
| 1988 | 9 12 18 | 8 GILBERT | 17.9 | 76.9  | 110 | 960  |
| 1988 | 9 13 0  | 8 GILBERT | 18.2 | 78.5  | 110 | 960  |
| 1988 | 9 13 6  | 8 GILBERT | 18.5 | 79.7  | 115 | 952  |
| 1988 | 9 13 12 | 8 GILBERT | 18.8 | 81.1  | 125 | 934  |
| 1988 | 9 13 18 | 8 GILBERT | 19.4 | 82.5  | 140 | 905  |
| 1988 | 9 14 0  | 8 GILBERT | 19.7 | 83.8  | 160 | 888  |
| 1988 | 9 14 6  | 8 GILBERT | 19.9 | 85.3  | 155 | 889  |
| 1988 | 9 14 12 | 8 GILBERT | 20.4 | 86.5  | 145 | 892  |
| 1988 | 9 14 18 | 8 GILBERT | 20.9 | 87.8  | 130 | 925  |
| 1988 | 9 15 0  | 8 GILBERT | 21.3 | 89.5  | 100 | 944  |
| 1988 | 9 15 6  | 8 GILBERT | 21.6 | 90.7  | 90  | 949  |
| 1988 | 9 15 12 | 8 GILBERT | 21.9 | 91.7  | 85  | 950  |
| 1988 | 9 15 18 | 8 GILBERT | 22.1 | 92.8  | 90  | 950  |
| 1988 | 9 16 0  | 8 GILBERT | 22.5 | 93.8  | 100 | 949  |
| 1988 | 9 16 6  | 8 GILBERT | 22.9 | 94.8  | 110 | 946  |
| 1988 | 9 16 12 | 8 GILBERT | 23.7 | 95.9  | 115 | 948  |
| 1988 | 9 16 18 | 8 GILBERT | 23.9 | 97.0  | 115 | 950  |
| 1988 | 9 17 0  | 8 GILBERT | 24.4 | 98.2  | 80  | 964  |
| 1988 | 9 17 6  | 8 GILBERT | 24.8 | 99.3  | 50  | 988  |
| 1988 | 9 17 12 | 8 GILBERT | 25.0 | 100.5 | 35  | 996  |
| 1988 | 9 17 18 | 8 GILBERT | 25.4 | 101.9 | 30  | 1000 |
| 1988 | 9 18 0  | 8 GILBERT | 26.0 | 103.2 | 30  | 1002 |
| 1988 | 9 18 6  | 8 GILBERT | 27.6 | 103.7 | 30  | 1004 |
| 1988 | 9 18 12 | 8 GILBERT | 29.3 | 102.6 | 25  | 1003 |
| 1988 | 9 18 18 | 8 GILBERT | 31.5 | 101.3 | 25  | 1003 |
| 1988 | 9 19 0  | 8 GILBERT | 33.2 | 99.7  | 25  | 1002 |
| 1988 | 9 19 6  | 8 GILBERT | 35.8 | 97.7  | 25  | 1001 |
| 1988 | 9 19 12 | 8 GILBERT | 37.7 | 93.2  | 25  | 999  |
| 1988 | 9 19 18 | 8 GILBERT | 40.2 | 89.9  | 25  | 998  |
| 1988 | 9 20 0  | 8 GILBERT | 43.4 | 86.5  | 25  | 995  |
| 1988 | 9 19 18 | 9 HELENE  | 13.4 | 31.6  | 30  | 1009 |
| 1988 | 9 20 0  | 9 HELENE  | 13.3 | 32.7  | 32  | 1008 |
| 1988 | 9 20 6  | 9 HELENE  | 13.2 | 33.8  | 35  | 1008 |
| 1988 | 9 20 12 | 9 HELENE  | 13.0 | 34.8  | 40  | 1004 |
| 1988 | 9 20 18 | 9 HELENE  | 12.4 | 35.7  | 45  | 1002 |
| 1988 | 9 21 0  | 9 HELENE  | 12.2 | 36.7  | 50  | 998  |
| 1988 | 9 21 6  | 9 HELENE  | 12.0 | 37.7  | 60  | 993  |
| 1988 | 9 21 12 | 9 HELENE  | 12.1 | 38.8  | 68  | 998  |
| 1988 | 9 21 18 | 9 HELENE  | 12.4 | 39.9  | 75  | 983  |
| 1988 | 9 22 0  | 9 HELENE  | 12.7 | 40.6  | 82  | 978  |

|      |      |       |        |      |      |     |      |
|------|------|-------|--------|------|------|-----|------|
| 1988 | 9 22 | 6 9   | HELENE | 13.0 | 41.5 | 90  | 972  |
| 1988 | 9 22 | 12 9  | HELENE | 13.2 | 42.3 | 95  | 965  |
| 1988 | 9 22 | 18 9  | HELENE | 13.5 | 43.1 | 102 | 959  |
| 1988 | 9 23 | 0 9   | HELENE | 13.9 | 44.0 | 110 | 953  |
| 1988 | 9 23 | 6 9   | HELENE | 14.1 | 44.9 | 117 | 945  |
| 1988 | 9 23 | 12 9  | HELENE | 14.7 | 45.5 | 120 | 939  |
| 1988 | 9 23 | 18 9  | HELENE | 15.3 | 46.1 | 125 | 938  |
| 1988 | 9 24 | 0 9   | HELENE | 15.9 | 46.9 | 120 | 940  |
| 1988 | 9 24 | 6 9   | HELENE | 16.6 | 47.5 | 118 | 944  |
| 1988 | 9 24 | 12 9  | HELENE | 17.4 | 48.0 | 115 | 948  |
| 1988 | 9 24 | 18 9  | HELENE | 18.1 | 48.5 | 110 | 954  |
| 1988 | 9 25 | 0 9   | HELENE | 18.7 | 48.9 | 102 | 959  |
| 1988 | 9 25 | 6 9   | HELENE | 19.4 | 49.0 | 98  | 963  |
| 1988 | 9 25 | 12 9  | HELENE | 20.0 | 49.1 | 94  | 966  |
| 1988 | 9 25 | 18 9  | HELENE | 20.9 | 49.3 | 90  | 968  |
| 1988 | 9 26 | 0 9   | HELENE | 22.2 | 49.5 | 87  | 971  |
| 1988 | 9 26 | 6 9   | HELENE | 23.4 | 49.7 | 85  | 973  |
| 1988 | 9 26 | 12 9  | HELENE | 24.5 | 49.9 | 80  | 975  |
| 1988 | 9 26 | 18 9  | HELENE | 25.8 | 50.3 | 78  | 976  |
| 1988 | 9 27 | 0 9   | HELENE | 27.1 | 51.1 | 77  | 977  |
| 1988 | 9 27 | 6 9   | HELENE | 28.2 | 51.9 | 77  | 979  |
| 1988 | 9 27 | 12 9  | HELENE | 29.8 | 52.0 | 77  | 979  |
| 1988 | 9 27 | 18 9  | HELENE | 30.9 | 51.9 | 77  | 979  |
| 1988 | 9 28 | 0 9   | HELENE | 31.9 | 51.5 | 77  | 979  |
| 1988 | 9 28 | 6 9   | HELENE | 32.8 | 51.0 | 78  | 977  |
| 1988 | 9 28 | 12 9  | HELENE | 33.5 | 50.3 | 80  | 975  |
| 1988 | 9 28 | 18 9  | HELENE | 34.7 | 49.5 | 85  | 972  |
| 1988 | 9 29 | 0 9   | HELENE | 36.1 | 48.5 | 90  | 970  |
| 1988 | 9 29 | 6 9   | HELENE | 38.0 | 46.5 | 90  | 970  |
| 1988 | 9 29 | 12 9  | HELENE | 40.2 | 44.4 | 85  | 973  |
| 1988 | 9 29 | 18 9  | HELENE | 42.9 | 42.0 | 75  | 979  |
| 1988 | 9 30 | 0 9   | HELENE | 46.2 | 38.8 | 65  | 985  |
| 1988 | 9 30 | 6 9   | HELENE | 50.2 | 34.5 | 65  | 990  |
| 1988 | 9 30 | 12 9  | HELENE | 55.0 | 30.0 | 60  | 992  |
| 1988 | 9 28 | 18 10 | ISAAC  | 9.0  | 45.5 | 25  | 1009 |
| 1988 | 9 29 | 0 10  | ISAAC  | 9.1  | 47.0 | 25  | 1008 |
| 1988 | 9 29 | 6 10  | ISAAC  | 9.3  | 48.7 | 25  | 1007 |
| 1988 | 9 29 | 12 10 | ISAAC  | 9.5  | 50.0 | 25  | 1007 |
| 1988 | 9 29 | 18 10 | ISAAC  | 9.6  | 51.3 | 30  | 1006 |
| 1988 | 9 30 | 0 10  | ISAAC  | 9.8  | 52.2 | 30  | 1006 |
| 1988 | 9 30 | 6 10  | ISAAC  | 10.2 | 53.1 | 30  | 1006 |
| 1988 | 9 30 | 12 10 | ISAAC  | 10.8 | 54.5 | 30  | 1005 |
| 1988 | 9 30 | 18 10 | ISAAC  | 11.4 | 56.0 | 35  | 1005 |
| 1988 | 10 1 | 0 10  | ISAAC  | 11.8 | 57.7 | 40  | 1005 |

|                       |      |      |         |
|-----------------------|------|------|---------|
| 1988 10 1 6 10 ISAAC  | 12.0 | 59.5 | 35 1005 |
| 1988 10 1 12 10 ISAAC | 12.0 | 61.2 | 30 1006 |
| 1988 10 10 18 11 JOAN | 8.9  | 42.2 | 25 1010 |
| 1988 10 11 0 11 JOAN  | 9.5  | 43.6 | 30 1008 |
| 1988 10 11 6 11 JOAN  | 10.1 | 45.0 | 35 1005 |
| 1988 10 11 12 11 JOAN | 10.7 | 46.4 | 40 1003 |
| 1988 10 11 18 11 JOAN | 11.2 | 47.9 | 45 1000 |
| 1988 10 12 0 11 JOAN  | 11.5 | 49.0 | 50 999  |
| 1988 10 12 6 11 JOAN  | 11.8 | 50.1 | 45 1000 |
| 1988 10 12 12 11 JOAN | 12.1 | 51.3 | 45 1003 |
| 1988 10 12 18 11 JOAN | 12.3 | 52.5 | 40 1006 |
| 1988 10 13 0 11 JOAN  | 12.4 | 53.8 | 40 1007 |
| 1988 10 13 6 11 JOAN  | 12.5 | 54.9 | 40 1007 |
| 1988 10 13 12 11 JOAN | 12.6 | 56.0 | 40 1006 |
| 1988 10 13 18 11 JOAN | 12.7 | 57.1 | 40 1005 |
| 1988 10 14 0 11 JOAN  | 12.6 | 58.3 | 40 1003 |
| 1988 10 14 6 11 JOAN  | 12.4 | 59.4 | 40 1002 |
| 1988 10 14 12 11 JOAN | 12.2 | 60.0 | 45 1001 |
| 1988 10 14 18 11 JOAN | 12.0 | 60.8 | 45 1001 |
| 1988 10 15 0 11 JOAN  | 12.1 | 61.5 | 45 1003 |
| 1988 10 15 6 11 JOAN  | 12.1 | 62.8 | 45 1004 |
| 1988 10 15 12 11 JOAN | 12.0 | 63.8 | 45 1004 |
| 1988 10 15 18 11 JOAN | 11.9 | 64.9 | 45 1003 |
| 1988 10 16 0 11 JOAN  | 12.0 | 66.1 | 45 1002 |
| 1988 10 16 6 11 JOAN  | 12.0 | 67.2 | 50 1001 |
| 1988 10 16 12 11 JOAN | 11.9 | 68.2 | 50 1000 |
| 1988 10 16 18 11 JOAN | 12.0 | 69.2 | 50 999  |
| 1988 10 17 0 11 JOAN  | 12.0 | 70.2 | 55 998  |
| 1988 10 17 6 11 JOAN  | 12.0 | 71.2 | 55 997  |
| 1988 10 17 12 11 JOAN | 11.9 | 72.1 | 60 995  |
| 1988 10 17 18 11 JOAN | 11.8 | 73.0 | 60 993  |
| 1988 10 18 0 11 JOAN  | 11.8 | 74.0 | 65 990  |
| 1988 10 18 6 11 JOAN  | 11.7 | 75.0 | 70 987  |
| 1988 10 18 12 11 JOAN | 11.5 | 75.8 | 75 984  |
| 1988 10 18 18 11 JOAN | 11.3 | 76.5 | 80 980  |
| 1988 10 19 0 11 JOAN  | 11.2 | 77.2 | 90 976  |
| 1988 10 19 6 11 JOAN  | 11.3 | 77.8 | 95 970  |
| 1988 10 19 12 11 JOAN | 11.4 | 78.3 | 105 960 |
| 1988 10 19 18 11 JOAN | 11.3 | 78.9 | 110 953 |
| 1988 10 20 0 11 JOAN  | 11.3 | 79.3 | 105 956 |
| 1988 10 20 6 11 JOAN  | 11.1 | 79.8 | 85 967  |
| 1988 10 20 12 11 JOAN | 11.1 | 79.5 | 70 971  |
| 1988 10 20 18 11 JOAN | 11.3 | 79.9 | 70 973  |
| 1988 10 21 0 11 JOAN  | 11.5 | 80.3 | 75 972  |

|                        |      |      |     |      |
|------------------------|------|------|-----|------|
| 1988 10 21 6 11 JOAN   | 11.5 | 80.7 | 90  | 970  |
| 1988 10 21 12 11 JOAN  | 11.6 | 81.2 | 100 | 964  |
| 1988 10 21 18 11 JOAN  | 11.8 | 81.8 | 110 | 952  |
| 1988 10 22 0 11 JOAN   | 11.9 | 82.5 | 120 | 937  |
| 1988 10 22 6 11 JOAN   | 11.9 | 83.2 | 125 | 932  |
| 1988 10 22 12 11 JOAN  | 11.9 | 83.9 | 120 | 936  |
| 1988 10 22 18 11 JOAN  | 12.0 | 85.0 | 70  | 983  |
| 1988 10 23 0 11 JOAN   | 12.1 | 85.9 | 55  | 993  |
| 1988 10 23 6 11 JOAN   | 12.2 | 86.8 | 45  | 1000 |
| 1988 11 17 18 12 KEITH | 14.9 | 74.3 | 30  | 1008 |
| 1988 11 18 0 12 KEITH  | 15.0 | 75.5 | 30  | 1008 |
| 1988 11 18 6 12 KEITH  | 15.0 | 76.5 | 30  | 1008 |
| 1988 11 18 12 12 KEITH | 15.0 | 77.7 | 30  | 1008 |
| 1988 11 18 18 12 KEITH | 15.0 | 79.0 | 30  | 1008 |
| 1988 11 19 0 12 KEITH  | 15.0 | 79.9 | 30  | 1007 |
| 1988 11 19 6 12 KEITH  | 15.1 | 80.4 | 30  | 1007 |
| 1988 11 19 12 12 KEITH | 15.2 | 81.2 | 30  | 1007 |
| 1988 11 19 18 12 KEITH | 15.5 | 81.8 | 30  | 1006 |
| 1988 11 20 0 12 KEITH  | 15.8 | 82.6 | 30  | 1005 |
| 1988 11 20 6 12 KEITH  | 16.3 | 83.4 | 34  | 1004 |
| 1988 11 20 12 12 KEITH | 17.8 | 84.5 | 40  | 1002 |
| 1988 11 20 18 12 KEITH | 19.1 | 85.4 | 45  | 997  |
| 1988 11 21 0 12 KEITH  | 19.8 | 86.1 | 60  | 985  |
| 1988 11 21 6 12 KEITH  | 20.7 | 86.6 | 60  | 993  |
| 1988 11 21 12 12 KEITH | 21.8 | 87.0 | 60  | 993  |
| 1988 11 21 18 12 KEITH | 22.4 | 87.2 | 60  | 990  |
| 1988 11 22 0 12 KEITH  | 23.1 | 87.0 | 60  | 993  |
| 1988 11 22 6 12 KEITH  | 23.8 | 86.8 | 55  | 995  |
| 1988 11 22 12 12 KEITH | 24.4 | 86.2 | 55  | 995  |
| 1988 11 22 18 12 KEITH | 25.5 | 85.1 | 55  | 993  |
| 1988 11 23 0 12 KEITH  | 26.5 | 84.2 | 55  | 994  |
| 1988 11 23 6 12 KEITH  | 27.3 | 82.8 | 55  | 995  |
| 1988 11 23 12 12 KEITH | 27.9 | 81.3 | 35  | 999  |
| 1988 11 23 18 12 KEITH | 28.9 | 79.8 | 40  | 998  |
| 1988 11 24 0 12 KEITH  | 29.7 | 77.7 | 50  | 995  |
| 1988 11 24 6 12 KEITH  | 31.0 | 75.2 | 55  | 992  |
| 1988 11 24 12 12 KEITH | 32.5 | 70.5 | 60  | 990  |
| 1988 11 24 18 12 KEITH | 34.0 | 66.0 | 55  | 985  |
| 1988 11 25 0 12 KEITH  | 36.0 | 60.0 | 50  | 982  |
| 1988 11 25 6 12 KEITH  | 39.0 | 54.0 | 50  | 976  |
| 1988 11 25 12 12 KEITH | 40.0 | 49.0 | 50  | 964  |
| 1988 11 25 18 12 KEITH | 44.0 | 45.0 | 55  | 960  |
| 1988 11 26 0 12 KEITH  | 48.0 | 43.0 | 65  | 950  |
| 1988 11 26 6 12 KEITH  | 52.0 | 42.0 | 65  | 945  |

|      |    |    |    |    |         |      |      |    |      |
|------|----|----|----|----|---------|------|------|----|------|
| 1988 | 11 | 26 | 12 | 12 | KEITH   | 52.5 | 44.0 | 65 | 945  |
| 1988 | 11 | 26 | 18 | 12 | KEITH   | 52.0 | 46.0 | 65 | 950  |
| 1989 | 6  | 24 | 18 | 1  | ALLISON | 27.0 | 96.0 | 30 | 1008 |
| 1989 | 6  | 25 | 0  | 1  | ALLISON | 27.0 | 96.0 | 30 | 1006 |
| 1989 | 6  | 25 | 6  | 1  | ALLISON | 27.2 | 96.0 | 30 | 1005 |
| 1989 | 6  | 25 | 12 | 1  | ALLISON | 27.4 | 95.9 | 30 | 1005 |
| 1989 | 6  | 25 | 18 | 1  | ALLISON | 27.6 | 95.8 | 30 | 1005 |
| 1989 | 6  | 26 | 0  | 1  | ALLISON | 27.8 | 95.8 | 35 | 1004 |
| 1989 | 6  | 26 | 6  | 1  | ALLISON | 28.1 | 95.8 | 35 | 1004 |
| 1989 | 6  | 26 | 12 | 1  | ALLISON | 28.6 | 95.7 | 40 | 1003 |
| 1989 | 6  | 26 | 18 | 1  | ALLISON | 29.1 | 95.7 | 45 | 1001 |
| 1989 | 6  | 27 | 0  | 1  | ALLISON | 29.7 | 95.7 | 45 | 999  |
| 1989 | 6  | 27 | 6  | 1  | ALLISON | 30.2 | 95.3 | 35 | 1000 |
| 1989 | 6  | 27 | 12 | 1  | ALLISON | 30.6 | 94.9 | 30 | 1002 |
| 1989 | 6  | 27 | 18 | 1  | ALLISON | 30.9 | 94.6 | 30 | 1004 |
| 1989 | 6  | 28 | 0  | 1  | ALLISON | 31.1 | 94.2 | 30 | 1004 |
| 1989 | 6  | 28 | 6  | 1  | ALLISON | 31.1 | 93.9 | 30 | 1005 |
| 1989 | 6  | 28 | 12 | 1  | ALLISON | 31.0 | 93.7 | 30 | 1006 |
| 1989 | 6  | 28 | 18 | 1  | ALLISON | 30.6 | 93.8 | 25 | 1007 |
| 1989 | 6  | 29 | 0  | 1  | ALLISON | 30.5 | 94.2 | 25 | 1008 |
| 1989 | 6  | 29 | 6  | 1  | ALLISON | 30.3 | 94.6 | 25 | 1008 |
| 1989 | 6  | 29 | 12 | 1  | ALLISON | 30.1 | 95.0 | 25 | 1008 |
| 1989 | 6  | 29 | 18 | 1  | ALLISON | 29.8 | 95.2 | 25 | 1008 |
| 1989 | 6  | 30 | 0  | 1  | ALLISON | 29.6 | 95.3 | 20 | 1009 |
| 1989 | 6  | 30 | 6  | 1  | ALLISON | 29.7 | 95.7 | 20 | 1010 |
| 1989 | 6  | 30 | 12 | 1  | ALLISON | 30.4 | 95.7 | 20 | 1011 |
| 1989 | 6  | 30 | 18 | 1  | ALLISON | 31.1 | 95.5 | 20 | 1010 |
| 1989 | 7  | 1  | 0  | 1  | ALLISON | 31.8 | 95.1 | 20 | 1010 |
| 1989 | 7  | 1  | 6  | 1  | ALLISON | 32.3 | 94.5 | 20 | 1010 |
| 1989 | 7  | 1  | 12 | 1  | ALLISON | 32.8 | 93.8 | 20 | 1010 |
| 1989 | 7  | 9  | 18 | 2  | BARRY   | 12.8 | 37.8 | 25 | 1015 |
| 1989 | 7  | 10 | 0  | 2  | BARRY   | 13.0 | 39.9 | 24 | 1015 |
| 1989 | 7  | 10 | 6  | 2  | BARRY   | 13.9 | 42.1 | 25 | 1014 |
| 1989 | 7  | 10 | 12 | 2  | BARRY   | 15.0 | 44.6 | 30 | 1013 |
| 1989 | 7  | 10 | 18 | 2  | BARRY   | 16.3 | 46.9 | 30 | 1013 |
| 1989 | 7  | 11 | 0  | 2  | BARRY   | 17.7 | 48.2 | 35 | 1012 |
| 1989 | 7  | 11 | 6  | 2  | BARRY   | 18.8 | 49.2 | 40 | 1011 |
| 1989 | 7  | 11 | 12 | 2  | BARRY   | 19.8 | 50.4 | 40 | 1010 |
| 1989 | 7  | 11 | 18 | 2  | BARRY   | 20.7 | 51.8 | 40 | 1007 |
| 1989 | 7  | 12 | 0  | 2  | BARRY   | 21.4 | 53.1 | 45 | 1005 |
| 1989 | 7  | 12 | 6  | 2  | BARRY   | 22.1 | 53.9 | 45 | 1005 |
| 1989 | 7  | 12 | 12 | 2  | BARRY   | 22.8 | 54.4 | 45 | 1005 |
| 1989 | 7  | 12 | 18 | 2  | BARRY   | 23.5 | 54.9 | 40 | 1008 |
| 1989 | 7  | 13 | 0  | 2  | BARRY   | 23.8 | 55.4 | 40 | 1012 |

|      |   |    |    |   |         |      |      |    |      |
|------|---|----|----|---|---------|------|------|----|------|
| 1989 | 7 | 13 | 6  | 2 | BARRY   | 24.0 | 56.0 | 35 | 1014 |
| 1989 | 7 | 13 | 12 | 2 | BARRY   | 23.9 | 56.6 | 35 | 1016 |
| 1989 | 7 | 13 | 18 | 2 | BARRY   | 23.7 | 57.4 | 30 | 1017 |
| 1989 | 7 | 14 | 0  | 2 | BARRY   | 23.3 | 58.1 | 30 | 1018 |
| 1989 | 7 | 30 | 12 | 3 | CHANTAL | 22.5 | 90.0 | 20 | 1011 |
| 1989 | 7 | 30 | 18 | 3 | CHANTAL | 23.5 | 90.2 | 25 | 1010 |
| 1989 | 7 | 31 | 0  | 3 | CHANTAL | 24.4 | 90.5 | 30 | 1009 |
| 1989 | 7 | 31 | 6  | 3 | CHANTAL | 25.4 | 91.0 | 35 | 1004 |
| 1989 | 7 | 31 | 12 | 3 | CHANTAL | 26.2 | 91.7 | 50 | 995  |
| 1989 | 7 | 31 | 18 | 3 | CHANTAL | 27.1 | 92.2 | 55 | 993  |
| 1989 | 8 | 1  | 0  | 3 | CHANTAL | 27.9 | 92.8 | 65 | 991  |
| 1989 | 8 | 1  | 6  | 3 | CHANTAL | 28.7 | 93.5 | 70 | 987  |
| 1989 | 8 | 1  | 12 | 3 | CHANTAL | 29.5 | 94.3 | 70 | 984  |
| 1989 | 8 | 1  | 18 | 3 | CHANTAL | 30.2 | 95.2 | 50 | 993  |
| 1989 | 8 | 2  | 0  | 3 | CHANTAL | 30.8 | 96.1 | 35 | 1000 |
| 1989 | 8 | 2  | 6  | 3 | CHANTAL | 31.5 | 96.9 | 25 | 1004 |
| 1989 | 8 | 2  | 12 | 3 | CHANTAL | 32.3 | 97.5 | 20 | 1007 |
| 1989 | 8 | 2  | 18 | 3 | CHANTAL | 33.3 | 98.0 | 20 | 1008 |
| 1989 | 8 | 3  | 0  | 3 | CHANTAL | 34.5 | 98.5 | 20 | 1009 |
| 1989 | 7 | 31 | 6  | 4 | DEAN    | 14.8 | 41.8 | 25 | 1010 |
| 1989 | 7 | 31 | 12 | 4 | DEAN    | 15.0 | 44.1 | 25 | 1009 |
| 1989 | 7 | 31 | 18 | 4 | DEAN    | 15.1 | 46.0 | 30 | 1008 |
| 1989 | 8 | 1  | 0  | 4 | DEAN    | 15.4 | 47.6 | 30 | 1006 |
| 1989 | 8 | 1  | 6  | 4 | DEAN    | 15.8 | 49.3 | 35 | 1004 |
| 1989 | 8 | 1  | 12 | 4 | DEAN    | 16.1 | 51.1 | 40 | 1002 |
| 1989 | 8 | 1  | 18 | 4 | DEAN    | 16.4 | 52.9 | 45 | 1000 |
| 1989 | 8 | 2  | 0  | 4 | DEAN    | 16.6 | 54.6 | 50 | 998  |
| 1989 | 8 | 2  | 6  | 4 | DEAN    | 16.9 | 56.4 | 60 | 996  |
| 1989 | 8 | 2  | 12 | 4 | DEAN    | 17.3 | 58.1 | 65 | 994  |
| 1989 | 8 | 2  | 18 | 4 | DEAN    | 17.9 | 59.5 | 70 | 992  |
| 1989 | 8 | 3  | 0  | 4 | DEAN    | 18.5 | 60.7 | 70 | 990  |
| 1989 | 8 | 3  | 6  | 4 | DEAN    | 18.9 | 61.7 | 70 | 987  |
| 1989 | 8 | 3  | 12 | 4 | DEAN    | 19.3 | 62.7 | 75 | 985  |
| 1989 | 8 | 3  | 18 | 4 | DEAN    | 19.7 | 63.4 | 75 | 985  |
| 1989 | 8 | 4  | 0  | 4 | DEAN    | 20.1 | 63.8 | 75 | 986  |
| 1989 | 8 | 4  | 6  | 4 | DEAN    | 20.4 | 63.9 | 75 | 986  |
| 1989 | 8 | 4  | 12 | 4 | DEAN    | 20.9 | 63.9 | 75 | 985  |
| 1989 | 8 | 4  | 18 | 4 | DEAN    | 21.6 | 63.8 | 75 | 984  |
| 1989 | 8 | 5  | 0  | 4 | DEAN    | 22.5 | 63.8 | 75 | 983  |
| 1989 | 8 | 5  | 6  | 4 | DEAN    | 23.5 | 63.8 | 75 | 983  |
| 1989 | 8 | 5  | 12 | 4 | DEAN    | 24.7 | 63.9 | 75 | 980  |
| 1989 | 8 | 5  | 18 | 4 | DEAN    | 26.0 | 64.0 | 75 | 980  |
| 1989 | 8 | 6  | 0  | 4 | DEAN    | 27.6 | 64.3 | 75 | 979  |
| 1989 | 8 | 6  | 6  | 4 | DEAN    | 29.2 | 64.6 | 80 | 978  |



|      |   |    |    |        |      |      |    |      |
|------|---|----|----|--------|------|------|----|------|
| 1989 | 8 | 6  | 12 | 4 DEAN | 30.8 | 65.0 | 80 | 975  |
| 1989 | 8 | 6  | 18 | 4 DEAN | 32.4 | 65.1 | 85 | 971  |
| 1989 | 8 | 7  | 0  | 4 DEAN | 34.0 | 64.9 | 90 | 968  |
| 1989 | 8 | 7  | 6  | 4 DEAN | 35.6 | 64.5 | 90 | 969  |
| 1989 | 8 | 7  | 12 | 4 DEAN | 37.5 | 64.0 | 85 | 979  |
| 1989 | 8 | 7  | 18 | 4 DEAN | 39.4 | 63.4 | 80 | 972  |
| 1989 | 8 | 8  | 0  | 4 DEAN | 41.7 | 62.1 | 75 | 975  |
| 1989 | 8 | 8  | 6  | 4 DEAN | 44.1 | 59.7 | 65 | 978  |
| 1989 | 8 | 8  | 12 | 4 DEAN | 46.5 | 56.5 | 55 | 991  |
| 1989 | 8 | 8  | 18 | 4 DEAN | 48.8 | 53.2 | 45 | 995  |
| 1989 | 8 | 9  | 0  | 4 DEAN | 50.8 | 48.1 | 40 | 1000 |
| 1989 | 8 | 9  | 6  | 4 DEAN | 51.8 | 41.9 | 35 | 1003 |
| 1989 | 8 | 18 | 0  | 5 ERIN | 14.3 | 22.4 | 25 | 1012 |
| 1989 | 8 | 18 | 6  | 5 ERIN | 15.2 | 23.8 | 25 | 1012 |
| 1989 | 8 | 18 | 12 | 5 ERIN | 16.2 | 25.2 | 25 | 1011 |
| 1989 | 8 | 18 | 18 | 5 ERIN | 17.0 | 26.5 | 30 | 1010 |
| 1989 | 8 | 19 | 0  | 5 ERIN | 17.4 | 27.8 | 30 | 1009 |
| 1989 | 8 | 19 | 6  | 5 ERIN | 17.7 | 29.4 | 30 | 1008 |
| 1989 | 8 | 19 | 12 | 5 ERIN | 18.1 | 31.1 | 30 | 1007 |
| 1989 | 8 | 19 | 18 | 5 ERIN | 18.5 | 32.7 | 35 | 1005 |
| 1989 | 8 | 20 | 0  | 5 ERIN | 19.1 | 34.3 | 35 | 1004 |
| 1989 | 8 | 20 | 6  | 5 ERIN | 19.6 | 35.6 | 40 | 1003 |
| 1989 | 8 | 20 | 12 | 5 ERIN | 20.1 | 36.9 | 40 | 1002 |
| 1989 | 8 | 20 | 18 | 5 ERIN | 20.6 | 38.3 | 40 | 1001 |
| 1989 | 8 | 21 | 0  | 5 ERIN | 21.1 | 39.7 | 45 | 1000 |
| 1989 | 8 | 21 | 6  | 5 ERIN | 22.0 | 41.1 | 45 | 998  |
| 1989 | 8 | 21 | 12 | 5 ERIN | 23.3 | 42.1 | 45 | 997  |
| 1989 | 8 | 21 | 18 | 5 ERIN | 24.7 | 42.8 | 50 | 994  |
| 1989 | 8 | 22 | 0  | 5 ERIN | 26.2 | 43.3 | 55 | 992  |
| 1989 | 8 | 22 | 6  | 5 ERIN | 27.6 | 43.8 | 60 | 989  |
| 1989 | 8 | 22 | 12 | 5 ERIN | 28.8 | 44.5 | 65 | 986  |
| 1989 | 8 | 22 | 18 | 5 ERIN | 29.7 | 45.2 | 70 | 983  |
| 1989 | 8 | 23 | 0  | 5 ERIN | 30.3 | 45.9 | 70 | 981  |
| 1989 | 8 | 23 | 6  | 5 ERIN | 30.9 | 46.3 | 75 | 979  |
| 1989 | 8 | 23 | 12 | 5 ERIN | 31.5 | 46.2 | 80 | 977  |
| 1989 | 8 | 23 | 18 | 5 ERIN | 32.0 | 46.0 | 80 | 975  |
| 1989 | 8 | 24 | 0  | 5 ERIN | 32.6 | 45.6 | 85 | 973  |
| 1989 | 8 | 24 | 6  | 5 ERIN | 33.3 | 45.2 | 85 | 971  |
| 1989 | 8 | 24 | 12 | 5 ERIN | 34.1 | 44.5 | 90 | 970  |
| 1989 | 8 | 24 | 18 | 5 ERIN | 35.1 | 43.6 | 90 | 969  |
| 1989 | 8 | 25 | 0  | 5 ERIN | 36.3 | 42.4 | 90 | 968  |
| 1989 | 8 | 25 | 6  | 5 ERIN | 37.6 | 41.1 | 90 | 969  |
| 1989 | 8 | 25 | 12 | 5 ERIN | 39.0 | 39.7 | 90 | 971  |
| 1989 | 8 | 25 | 18 | 5 ERIN | 40.6 | 38.3 | 85 | 973  |

|      |      |    |         |      |      |    |      |
|------|------|----|---------|------|------|----|------|
| 1989 | 8 26 | 0  | 5 ERIN  | 42.3 | 37.2 | 80 | 976  |
| 1989 | 8 26 | 6  | 5 ERIN  | 44.4 | 36.2 | 75 | 980  |
| 1989 | 8 26 | 12 | 5 ERIN  | 47.0 | 35.1 | 70 | 983  |
| 1989 | 8 26 | 18 | 5 ERIN  | 49.5 | 33.5 | 65 | 986  |
| 1989 | 8 27 | 0  | 5 ERIN  | 51.9 | 31.8 | 60 | 991  |
| 1989 | 8 26 | 0  | 6 FELIX | 16.8 | 21.0 | 25 | 1009 |
| 1989 | 8 26 | 6  | 6 FELIX | 16.9 | 21.7 | 30 | 1008 |
| 1989 | 8 26 | 12 | 6 FELIX | 17.0 | 22.2 | 30 | 1007 |
| 1989 | 8 26 | 18 | 6 FELIX | 17.2 | 22.9 | 35 | 1005 |
| 1989 | 8 27 | 0  | 6 FELIX | 17.4 | 23.5 | 35 | 1003 |
| 1989 | 8 27 | 6  | 6 FELIX | 17.8 | 23.9 | 40 | 1001 |
| 1989 | 8 27 | 12 | 6 FELIX | 18.2 | 24.0 | 45 | 1000 |
| 1989 | 8 27 | 18 | 6 FELIX | 18.7 | 24.3 | 50 | 998  |
| 1989 | 8 28 | 0  | 6 FELIX | 19.1 | 24.6 | 50 | 996  |
| 1989 | 8 28 | 6  | 6 FELIX | 19.7 | 24.8 | 55 | 995  |
| 1989 | 8 28 | 12 | 6 FELIX | 20.0 | 24.9 | 50 | 995  |
| 1989 | 8 28 | 18 | 6 FELIX | 20.5 | 24.9 | 50 | 995  |
| 1989 | 8 29 | 0  | 6 FELIX | 20.8 | 25.3 | 45 | 1000 |
| 1989 | 8 29 | 6  | 6 FELIX | 21.1 | 26.0 | 35 | 1001 |
| 1989 | 8 29 | 12 | 6 FELIX | 21.4 | 26.9 | 35 | 1005 |
| 1989 | 8 29 | 18 | 6 FELIX | 21.9 | 27.8 | 30 | 1006 |
| 1989 | 8 30 | 0  | 6 FELIX | 22.5 | 28.7 | 30 | 1008 |
| 1989 | 8 30 | 6  | 6 FELIX | 23.4 | 29.7 | 30 | 1009 |
| 1989 | 8 30 | 12 | 6 FELIX | 24.2 | 31.0 | 30 | 1009 |
| 1989 | 8 30 | 18 | 6 FELIX | 25.1 | 32.4 | 30 | 1010 |
| 1989 | 8 31 | 0  | 6 FELIX | 26.3 | 34.0 | 30 | 1010 |
| 1989 | 8 31 | 6  | 6 FELIX | 27.6 | 35.6 | 30 | 1010 |
| 1989 | 8 31 | 12 | 6 FELIX | 28.9 | 37.1 | 30 | 1010 |
| 1989 | 8 31 | 18 | 6 FELIX | 29.7 | 38.6 | 30 | 1010 |
| 1989 | 9 1  | 0  | 6 FELIX | 30.5 | 39.7 | 30 | 1009 |
| 1989 | 9 1  | 6  | 6 FELIX | 31.1 | 41.1 | 30 | 1009 |
| 1989 | 9 1  | 12 | 6 FELIX | 31.8 | 40.8 | 30 | 1009 |
| 1989 | 9 1  | 18 | 6 FELIX | 32.2 | 40.9 | 30 | 1009 |
| 1989 | 9 2  | 0  | 6 FELIX | 32.7 | 40.9 | 30 | 1008 |
| 1989 | 9 2  | 6  | 6 FELIX | 33.0 | 40.9 | 30 | 1008 |
| 1989 | 9 2  | 12 | 6 FELIX | 33.1 | 41.0 | 30 | 1008 |
| 1989 | 9 2  | 18 | 6 FELIX | 33.2 | 41.3 | 30 | 1008 |
| 1989 | 9 3  | 0  | 6 FELIX | 33.2 | 41.8 | 35 | 1005 |
| 1989 | 9 3  | 6  | 6 FELIX | 33.4 | 42.3 | 35 | 1005 |
| 1989 | 9 3  | 12 | 6 FELIX | 33.5 | 42.9 | 35 | 1005 |
| 1989 | 9 3  | 18 | 6 FELIX | 33.8 | 43.9 | 35 | 1005 |
| 1989 | 9 4  | 0  | 6 FELIX | 34.0 | 45.2 | 40 | 1004 |
| 1989 | 9 4  | 6  | 6 FELIX | 34.3 | 46.3 | 40 | 1003 |
| 1989 | 9 4  | 12 | 6 FELIX | 34.9 | 47.5 | 45 | 1002 |

|      |   |    |    |   |           |      |      |     |      |
|------|---|----|----|---|-----------|------|------|-----|------|
| 1989 | 9 | 4  | 18 | 6 | FELIX     | 35.3 | 48.1 | 45  | 1000 |
| 1989 | 9 | 5  | 0  | 6 | FELIX     | 35.7 | 48.8 | 55  | 995  |
| 1989 | 9 | 5  | 6  | 6 | FELIX     | 36.0 | 48.7 | 65  | 988  |
| 1989 | 9 | 5  | 12 | 6 | FELIX     | 36.3 | 48.6 | 70  | 982  |
| 1989 | 9 | 5  | 18 | 6 | FELIX     | 36.7 | 48.3 | 75  | 979  |
| 1989 | 9 | 6  | 0  | 6 | FELIX     | 36.9 | 48.2 | 75  | 979  |
| 1989 | 9 | 6  | 6  | 6 | FELIX     | 37.2 | 48.1 | 75  | 979  |
| 1989 | 9 | 6  | 12 | 6 | FELIX     | 37.4 | 48.0 | 70  | 982  |
| 1989 | 9 | 6  | 18 | 6 | FELIX     | 37.6 | 47.9 | 70  | 984  |
| 1989 | 9 | 7  | 0  | 6 | FELIX     | 38.0 | 47.8 | 65  | 988  |
| 1989 | 9 | 7  | 6  | 6 | FELIX     | 38.5 | 47.7 | 60  | 990  |
| 1989 | 9 | 7  | 12 | 6 | FELIX     | 39.3 | 47.6 | 55  | 992  |
| 1989 | 9 | 7  | 18 | 6 | FELIX     | 40.4 | 47.0 | 50  | 994  |
| 1989 | 9 | 8  | 0  | 6 | FELIX     | 41.3 | 46.7 | 50  | 995  |
| 1989 | 9 | 8  | 6  | 6 | FELIX     | 42.4 | 45.8 | 45  | 998  |
| 1989 | 9 | 8  | 12 | 6 | FELIX     | 43.6 | 44.8 | 45  | 1000 |
| 1989 | 9 | 8  | 18 | 6 | FELIX     | 45.0 | 42.8 | 40  | 1002 |
| 1989 | 9 | 9  | 0  | 6 | FELIX     | 46.5 | 40.5 | 35  | 1005 |
| 1989 | 9 | 9  | 6  | 6 | FELIX     | 46.5 | 38.0 | 37  | 1002 |
| 1989 | 9 | 9  | 12 | 6 | FELIX     | 46.5 | 35.5 | 40  | 1000 |
| 1989 | 9 | 9  | 18 | 6 | FELIX     | 45.5 | 33.5 | 45  | 997  |
| 1989 | 9 | 10 | 0  | 6 | FELIX     | 44.5 | 31.5 | 50  | 995  |
| 1989 | 9 | 10 | 6  | 6 | FELIX     | 43.5 | 30.2 | 50  | 995  |
| 1989 | 9 | 10 | 12 | 6 | FELIX     | 42.5 | 29.0 | 50  | 995  |
| 1989 | 8 | 30 | 12 | 7 | GABRIELLE | 11.6 | 21.0 | 25  | 1011 |
| 1989 | 8 | 30 | 18 | 7 | GABRIELLE | 11.3 | 23.0 | 30  | 1009 |
| 1989 | 8 | 31 | 0  | 7 | GABRIELLE | 11.3 | 24.8 | 35  | 1005 |
| 1989 | 8 | 31 | 6  | 7 | GABRIELLE | 11.4 | 26.5 | 35  | 1005 |
| 1989 | 8 | 31 | 12 | 7 | GABRIELLE | 11.5 | 28.3 | 45  | 1000 |
| 1989 | 8 | 31 | 18 | 7 | GABRIELLE | 11.5 | 30.0 | 55  | 994  |
| 1989 | 9 | 1  | 0  | 7 | GABRIELLE | 11.5 | 31.7 | 65  | 987  |
| 1989 | 9 | 1  | 6  | 7 | GABRIELLE | 11.8 | 33.4 | 65  | 987  |
| 1989 | 9 | 1  | 12 | 7 | GABRIELLE | 12.3 | 35.1 | 65  | 987  |
| 1989 | 9 | 1  | 18 | 7 | GABRIELLE | 12.8 | 36.8 | 65  | 987  |
| 1989 | 9 | 2  | 0  | 7 | GABRIELLE | 13.4 | 38.6 | 75  | 980  |
| 1989 | 9 | 2  | 6  | 7 | GABRIELLE | 13.9 | 40.3 | 80  | 977  |
| 1989 | 9 | 2  | 12 | 7 | GABRIELLE | 14.4 | 42.0 | 85  | 974  |
| 1989 | 9 | 2  | 18 | 7 | GABRIELLE | 14.8 | 43.8 | 90  | 970  |
| 1989 | 9 | 3  | 0  | 7 | GABRIELLE | 15.2 | 45.5 | 95  | 966  |
| 1989 | 9 | 3  | 6  | 7 | GABRIELLE | 15.6 | 47.2 | 100 | 960  |
| 1989 | 9 | 3  | 12 | 7 | GABRIELLE | 16.1 | 48.8 | 105 | 948  |
| 1989 | 9 | 3  | 18 | 7 | GABRIELLE | 16.5 | 50.3 | 105 | 937  |
| 1989 | 9 | 4  | 0  | 7 | GABRIELLE | 17.0 | 51.5 | 105 | 927  |
| 1989 | 9 | 4  | 6  | 7 | GABRIELLE | 17.4 | 52.7 | 110 | 940  |

|      |   |    |    |   |           |      |      |     |      |
|------|---|----|----|---|-----------|------|------|-----|------|
| 1989 | 9 | 4  | 12 | 7 | GABRIELLE | 18.0 | 53.8 | 115 | 942  |
| 1989 | 9 | 4  | 18 | 7 | GABRIELLE | 18.6 | 54.8 | 120 | 942  |
| 1989 | 9 | 5  | 0  | 7 | GABRIELLE | 19.3 | 55.7 | 125 | 944  |
| 1989 | 9 | 5  | 6  | 7 | GABRIELLE | 19.9 | 56.5 | 125 | 941  |
| 1989 | 9 | 5  | 12 | 7 | GABRIELLE | 20.6 | 57.2 | 125 | 941  |
| 1989 | 9 | 5  | 18 | 7 | GABRIELLE | 21.4 | 57.8 | 125 | 941  |
| 1989 | 9 | 6  | 0  | 7 | GABRIELLE | 22.2 | 58.3 | 125 | 944  |
| 1989 | 9 | 6  | 6  | 7 | GABRIELLE | 23.1 | 58.8 | 120 | 942  |
| 1989 | 9 | 6  | 12 | 7 | GABRIELLE | 24.0 | 59.3 | 120 | 944  |
| 1989 | 9 | 6  | 18 | 7 | GABRIELLE | 25.1 | 59.8 | 120 | 944  |
| 1989 | 9 | 7  | 0  | 7 | GABRIELLE | 26.4 | 60.0 | 120 | 943  |
| 1989 | 9 | 7  | 6  | 7 | GABRIELLE | 27.7 | 60.0 | 105 | 948  |
| 1989 | 9 | 7  | 12 | 7 | GABRIELLE | 29.0 | 59.9 | 95  | 950  |
| 1989 | 9 | 7  | 18 | 7 | GABRIELLE | 30.5 | 59.8 | 95  | 951  |
| 1989 | 9 | 8  | 0  | 7 | GABRIELLE | 32.1 | 59.6 | 95  | 951  |
| 1989 | 9 | 8  | 6  | 7 | GABRIELLE | 33.7 | 59.6 | 90  | 955  |
| 1989 | 9 | 8  | 12 | 7 | GABRIELLE | 35.1 | 59.6 | 85  | 961  |
| 1989 | 9 | 8  | 18 | 7 | GABRIELLE | 36.4 | 59.7 | 80  | 970  |
| 1989 | 9 | 9  | 0  | 7 | GABRIELLE | 37.2 | 59.8 | 75  | 979  |
| 1989 | 9 | 9  | 6  | 7 | GABRIELLE | 38.0 | 59.9 | 70  | 987  |
| 1989 | 9 | 9  | 12 | 7 | GABRIELLE | 38.5 | 60.0 | 65  | 988  |
| 1989 | 9 | 9  | 18 | 7 | GABRIELLE | 38.9 | 60.1 | 65  | 990  |
| 1989 | 9 | 10 | 0  | 7 | GABRIELLE | 39.1 | 60.3 | 65  | 990  |
| 1989 | 9 | 10 | 6  | 7 | GABRIELLE | 39.1 | 60.4 | 60  | 994  |
| 1989 | 9 | 10 | 12 | 7 | GABRIELLE | 39.1 | 60.6 | 60  | 996  |
| 1989 | 9 | 10 | 18 | 7 | GABRIELLE | 39.1 | 61.1 | 55  | 998  |
| 1989 | 9 | 11 | 0  | 7 | GABRIELLE | 39.1 | 61.6 | 50  | 1000 |
| 1989 | 9 | 11 | 6  | 7 | GABRIELLE | 39.0 | 62.0 | 45  | 1002 |
| 1989 | 9 | 11 | 12 | 7 | GABRIELLE | 39.4 | 62.0 | 40  | 1003 |
| 1989 | 9 | 11 | 18 | 7 | GABRIELLE | 39.9 | 61.3 | 35  | 1005 |
| 1989 | 9 | 12 | 0  | 7 | GABRIELLE | 40.2 | 60.6 | 35  | 1005 |
| 1989 | 9 | 12 | 6  | 7 | GABRIELLE | 40.3 | 59.7 | 35  | 1006 |
| 1989 | 9 | 12 | 12 | 7 | GABRIELLE | 40.5 | 58.7 | 30  | 1007 |
| 1989 | 9 | 12 | 18 | 7 | GABRIELLE | 41.0 | 57.1 | 30  | 1008 |
| 1989 | 9 | 13 | 0  | 7 | GABRIELLE | 41.8 | 55.3 | 30  | 1009 |
| 1989 | 9 | 13 | 6  | 7 | GABRIELLE | 42.7 | 53.5 | 30  | 1010 |
| 1989 | 9 | 13 | 12 | 7 | GABRIELLE | 43.8 | 51.5 | 30  | 1010 |
| 1989 | 9 | 10 | 12 | 8 | HUGO      | 13.2 | 20.0 | 25  | 1010 |
| 1989 | 9 | 10 | 18 | 8 | HUGO      | 13.3 | 21.8 | 25  | 1010 |
| 1989 | 9 | 11 | 0  | 8 | HUGO      | 13.2 | 23.7 | 30  | 1009 |
| 1989 | 9 | 11 | 6  | 8 | HUGO      | 13.0 | 25.5 | 30  | 1007 |
| 1989 | 9 | 11 | 12 | 8 | HUGO      | 12.8 | 27.3 | 30  | 1005 |
| 1989 | 9 | 11 | 18 | 8 | HUGO      | 12.5 | 29.2 | 35  | 1003 |
| 1989 | 9 | 12 | 0  | 8 | HUGO      | 12.5 | 31.0 | 40  | 1002 |

|      |      |    |        |      |      |     |      |
|------|------|----|--------|------|------|-----|------|
| 1989 | 9 12 | 6  | 8 HUGO | 12.5 | 32.9 | 45  | 1000 |
| 1989 | 9 12 | 12 | 8 HUGO | 12.5 | 34.8 | 45  | 998  |
| 1989 | 9 12 | 18 | 8 HUGO | 12.6 | 36.7 | 50  | 996  |
| 1989 | 9 13 | 0  | 8 HUGO | 12.6 | 38.2 | 55  | 994  |
| 1989 | 9 13 | 6  | 8 HUGO | 12.7 | 40.0 | 55  | 992  |
| 1989 | 9 13 | 12 | 8 HUGO | 12.8 | 41.8 | 60  | 990  |
| 1989 | 9 13 | 18 | 8 HUGO | 12.8 | 43.5 | 65  | 987  |
| 1989 | 9 14 | 0  | 8 HUGO | 12.9 | 44.9 | 70  | 984  |
| 1989 | 9 14 | 6  | 8 HUGO | 13.0 | 46.3 | 80  | 980  |
| 1989 | 9 14 | 12 | 8 HUGO | 13.2 | 47.8 | 85  | 975  |
| 1989 | 9 14 | 18 | 8 HUGO | 13.6 | 49.1 | 90  | 970  |
| 1989 | 9 15 | 0  | 8 HUGO | 13.8 | 50.5 | 100 | 962  |
| 1989 | 9 15 | 6  | 8 HUGO | 14.0 | 51.9 | 110 | 957  |
| 1989 | 9 15 | 12 | 8 HUGO | 14.2 | 53.3 | 125 | 940  |
| 1989 | 9 15 | 18 | 8 HUGO | 14.6 | 54.6 | 140 | 918  |
| 1989 | 9 16 | 0  | 8 HUGO | 14.8 | 56.1 | 135 | 923  |
| 1989 | 9 16 | 6  | 8 HUGO | 15.1 | 57.3 | 130 | 927  |
| 1989 | 9 16 | 12 | 8 HUGO | 15.4 | 58.4 | 120 | 940  |
| 1989 | 9 16 | 18 | 8 HUGO | 15.8 | 59.4 | 120 | 941  |
| 1989 | 9 17 | 0  | 8 HUGO | 16.1 | 60.4 | 120 | 941  |
| 1989 | 9 17 | 6  | 8 HUGO | 16.4 | 61.5 | 120 | 943  |
| 1989 | 9 17 | 12 | 8 HUGO | 16.6 | 62.5 | 125 | 949  |
| 1989 | 9 17 | 18 | 8 HUGO | 16.9 | 63.5 | 125 | 945  |
| 1989 | 9 18 | 0  | 8 HUGO | 17.2 | 64.1 | 130 | 934  |
| 1989 | 9 18 | 6  | 8 HUGO | 17.7 | 64.8 | 120 | 940  |
| 1989 | 9 18 | 12 | 8 HUGO | 18.2 | 65.5 | 110 | 945  |
| 1989 | 9 18 | 18 | 8 HUGO | 19.1 | 66.4 | 105 | 958  |
| 1989 | 9 19 | 0  | 8 HUGO | 19.7 | 66.8 | 100 | 959  |
| 1989 | 9 19 | 6  | 8 HUGO | 20.7 | 67.3 | 90  | 962  |
| 1989 | 9 19 | 12 | 8 HUGO | 21.6 | 68.0 | 90  | 964  |
| 1989 | 9 19 | 18 | 8 HUGO | 22.6 | 68.6 | 90  | 966  |
| 1989 | 9 20 | 0  | 8 HUGO | 23.5 | 69.3 | 90  | 957  |
| 1989 | 9 20 | 6  | 8 HUGO | 24.4 | 70.1 | 90  | 957  |
| 1989 | 9 20 | 12 | 8 HUGO | 25.2 | 71.0 | 95  | 958  |
| 1989 | 9 20 | 18 | 8 HUGO | 26.3 | 72.2 | 95  | 953  |
| 1989 | 9 21 | 0  | 8 HUGO | 27.2 | 73.4 | 100 | 950  |
| 1989 | 9 21 | 6  | 8 HUGO | 28.0 | 74.9 | 100 | 950  |
| 1989 | 9 21 | 12 | 8 HUGO | 29.0 | 76.1 | 110 | 948  |
| 1989 | 9 21 | 18 | 8 HUGO | 30.2 | 77.5 | 120 | 944  |
| 1989 | 9 22 | 0  | 8 HUGO | 31.7 | 78.8 | 120 | 935  |
| 1989 | 9 22 | 6  | 8 HUGO | 33.5 | 80.3 | 85  | 952  |
| 1989 | 9 22 | 12 | 8 HUGO | 35.9 | 81.7 | 55  | 975  |
| 1989 | 9 22 | 18 | 8 HUGO | 38.5 | 81.8 | 40  | 987  |
| 1989 | 9 23 | 0  | 8 HUGO | 42.2 | 80.2 | 35  | 988  |

|      |       |    |          |      |      |    |      |
|------|-------|----|----------|------|------|----|------|
| 1989 | 9 23  | 6  | 8 HUGO   | 46.0 | 74.5 | 40 | 990  |
| 1989 | 9 23  | 12 | 8 HUGO   | 49.0 | 69.0 | 40 | 992  |
| 1989 | 9 23  | 18 | 8 HUGO   | 51.0 | 65.0 | 40 | 993  |
| 1989 | 9 24  | 0  | 8 HUGO   | 52.0 | 62.0 | 40 | 994  |
| 1989 | 9 24  | 6  | 8 HUGO   | 52.5 | 60.5 | 40 | 993  |
| 1989 | 9 24  | 12 | 8 HUGO   | 53.0 | 59.5 | 40 | 991  |
| 1989 | 9 24  | 18 | 8 HUGO   | 53.5 | 58.5 | 40 | 989  |
| 1989 | 9 25  | 0  | 8 HUGO   | 54.0 | 57.0 | 40 | 983  |
| 1989 | 9 25  | 6  | 8 HUGO   | 56.0 | 52.0 | 40 | 979  |
| 1989 | 9 25  | 12 | 8 HUGO   | 58.0 | 46.0 | 40 | 974  |
| 1989 | 9 16  | 18 | 9 IRIS   | 11.3 | 44.0 | 25 | 1017 |
| 1989 | 9 17  | 0  | 9 IRIS   | 11.2 | 46.0 | 30 | 1010 |
| 1989 | 9 17  | 6  | 9 IRIS   | 11.2 | 48.0 | 30 | 1009 |
| 1989 | 9 17  | 12 | 9 IRIS   | 11.3 | 50.0 | 30 | 1008 |
| 1989 | 9 17  | 18 | 9 IRIS   | 11.5 | 51.7 | 30 | 1007 |
| 1989 | 9 18  | 0  | 9 IRIS   | 11.9 | 53.2 | 35 | 1005 |
| 1989 | 9 18  | 6  | 9 IRIS   | 12.6 | 54.6 | 35 | 1004 |
| 1989 | 9 18  | 12 | 9 IRIS   | 14.0 | 55.5 | 40 | 1003 |
| 1989 | 9 18  | 18 | 9 IRIS   | 15.6 | 56.1 | 45 | 1002 |
| 1989 | 9 19  | 0  | 9 IRIS   | 17.0 | 56.8 | 50 | 1001 |
| 1989 | 9 19  | 6  | 9 IRIS   | 18.1 | 57.5 | 55 | 1001 |
| 1989 | 9 19  | 12 | 9 IRIS   | 19.2 | 58.2 | 60 | 1001 |
| 1989 | 9 19  | 18 | 9 IRIS   | 20.0 | 59.2 | 60 | 1001 |
| 1989 | 9 20  | 0  | 9 IRIS   | 20.5 | 60.3 | 50 | 1002 |
| 1989 | 9 20  | 6  | 9 IRIS   | 20.9 | 61.3 | 40 | 1003 |
| 1989 | 9 20  | 12 | 9 IRIS   | 21.3 | 62.2 | 35 | 1005 |
| 1989 | 9 20  | 18 | 9 IRIS   | 21.7 | 63.1 | 35 | 1007 |
| 1989 | 9 21  | 0  | 9 IRIS   | 21.9 | 64.1 | 30 | 1008 |
| 1989 | 9 21  | 6  | 9 IRIS   | 22.2 | 65.1 | 30 | 1010 |
| 1989 | 9 21  | 12 | 9 IRIS   | 22.4 | 66.0 | 25 | 1011 |
| 1989 | 9 21  | 18 | 9 IRIS   | 22.5 | 67.0 | 25 | 1012 |
| 1989 | 10 12 | 12 | 10 JERRY | 19.4 | 92.4 | 25 | 1009 |
| 1989 | 10 12 | 18 | 10 JERRY | 19.8 | 92.7 | 30 | 1006 |
| 1989 | 10 13 | 0  | 10 JERRY | 20.4 | 93.0 | 35 | 1004 |
| 1989 | 10 13 | 6  | 10 JERRY | 21.0 | 93.2 | 40 | 1001 |
| 1989 | 10 13 | 12 | 10 JERRY | 21.7 | 93.3 | 45 | 997  |
| 1989 | 10 13 | 18 | 10 JERRY | 22.6 | 93.4 | 50 | 995  |
| 1989 | 10 14 | 0  | 10 JERRY | 23.5 | 93.5 | 55 | 991  |
| 1989 | 10 14 | 6  | 10 JERRY | 24.2 | 93.3 | 55 | 992  |
| 1989 | 10 14 | 12 | 10 JERRY | 24.6 | 93.1 | 55 | 992  |
| 1989 | 10 14 | 18 | 10 JERRY | 25.0 | 92.8 | 55 | 994  |
| 1989 | 10 15 | 0  | 10 JERRY | 25.8 | 93.1 | 55 | 994  |
| 1989 | 10 15 | 6  | 10 JERRY | 26.5 | 93.4 | 55 | 994  |
| 1989 | 10 15 | 12 | 10 JERRY | 27.3 | 94.0 | 60 | 991  |

|                        |      |      |    |      |
|------------------------|------|------|----|------|
| 1989 10 15 18 10 JERRY | 28.1 | 94.6 | 65 | 986  |
| 1989 10 16 0 10 JERRY  | 29.1 | 95.0 | 75 | 983  |
| 1989 10 16 6 10 JERRY  | 30.4 | 94.9 | 35 | 991  |
| 1989 10 16 12 10 JERRY | 32.0 | 94.5 | 20 | 1000 |
| 1989 10 16 18 10 JERRY | 33.8 | 93.8 | 15 | 1009 |
| 1989 11 28 12 11 KAREN | 17.1 | 84.0 | 25 | 1005 |
| 1989 11 28 18 11 KAREN | 18.0 | 84.8 | 30 | 1004 |
| 1989 11 29 0 11 KAREN  | 19.0 | 85.1 | 30 | 1004 |
| 1989 11 29 6 11 KAREN  | 19.5 | 85.1 | 30 | 1005 |
| 1989 11 29 12 11 KAREN | 20.0 | 85.0 | 30 | 1005 |
| 1989 11 29 18 11 KAREN | 20.4 | 84.6 | 30 | 1005 |
| 1989 11 30 0 11 KAREN  | 20.8 | 84.2 | 35 | 1004 |
| 1989 11 30 6 11 KAREN  | 20.8 | 83.6 | 45 | 1003 |
| 1989 11 30 12 11 KAREN | 20.8 | 83.4 | 50 | 1001 |
| 1989 11 30 18 11 KAREN | 20.5 | 83.1 | 50 | 1000 |
| 1989 12 1 0 11 KAREN   | 19.9 | 83.1 | 45 | 1001 |
| 1989 12 1 6 11 KAREN   | 19.3 | 83.2 | 40 | 1002 |
| 1989 12 1 12 11 KAREN  | 19.0 | 83.3 | 35 | 1003 |
| 1989 12 1 18 11 KAREN  | 18.5 | 84.0 | 35 | 1005 |
| 1989 12 2 0 11 KAREN   | 18.0 | 84.5 | 35 | 1005 |
| 1989 12 2 6 11 KAREN   | 17.8 | 84.9 | 35 | 1005 |
| 1989 12 2 12 11 KAREN  | 17.5 | 85.5 | 35 | 1006 |
| 1989 12 2 18 11 KAREN  | 17.5 | 85.5 | 35 | 1007 |
| 1989 12 3 0 11 KAREN   | 17.5 | 85.5 | 35 | 1007 |
| 1989 12 3 6 11 KAREN   | 17.4 | 85.3 | 40 | 1005 |
| 1989 12 3 12 11 KAREN  | 17.2 | 85.0 | 40 | 1004 |
| 1989 12 3 18 11 KAREN  | 17.0 | 84.5 | 40 | 1001 |
| 1989 12 4 0 11 KAREN   | 16.5 | 83.9 | 35 | 1002 |
| 1989 12 4 6 11 KAREN   | 16.5 | 83.9 | 30 | 1005 |
| 1990 7 22 6 1 ARTHUR   | 8.8  | 41.9 | 25 | 1010 |
| 1990 7 22 12 1 ARTHUR  | 8.9  | 43.2 | 25 | 1010 |
| 1990 7 22 18 1 ARTHUR  | 9.3  | 44.6 | 25 | 1010 |
| 1990 7 23 0 1 ARTHUR   | 9.3  | 46.4 | 25 | 1010 |
| 1990 7 23 6 1 ARTHUR   | 9.2  | 48.4 | 25 | 1010 |
| 1990 7 23 12 1 ARTHUR  | 9.2  | 50.3 | 25 | 1010 |
| 1990 7 23 18 1 ARTHUR  | 9.4  | 52.1 | 25 | 1009 |
| 1990 7 24 0 1 ARTHUR   | 9.7  | 53.7 | 30 | 1008 |
| 1990 7 24 6 1 ARTHUR   | 10.1 | 55.3 | 30 | 1007 |
| 1990 7 24 12 1 ARTHUR  | 10.5 | 56.8 | 35 | 1006 |
| 1990 7 24 18 1 ARTHUR  | 10.8 | 58.5 | 35 | 1005 |
| 1990 7 25 0 1 ARTHUR   | 11.1 | 60.0 | 40 | 1004 |
| 1990 7 25 6 1 ARTHUR   | 11.7 | 61.3 | 45 | 1003 |
| 1990 7 25 12 1 ARTHUR  | 12.4 | 62.5 | 50 | 1001 |
| 1990 7 25 18 1 ARTHUR  | 13.1 | 63.7 | 60 | 995  |

|      |      |    |   |        |      |      |    |      |
|------|------|----|---|--------|------|------|----|------|
| 1990 | 7 26 | 0  | 1 | ARTHUR | 13.7 | 65.0 | 60 | 997  |
| 1990 | 7 26 | 6  | 1 | ARTHUR | 14.2 | 66.4 | 50 | 1000 |
| 1990 | 7 26 | 12 | 1 | ARTHUR | 14.8 | 67.9 | 45 | 1002 |
| 1990 | 7 26 | 18 | 1 | ARTHUR | 15.6 | 69.8 | 40 | 1007 |
| 1990 | 7 27 | 0  | 1 | ARTHUR | 16.2 | 71.8 | 35 | 1009 |
| 1990 | 7 27 | 6  | 1 | ARTHUR | 16.6 | 73.8 | 30 | 1010 |
| 1990 | 7 27 | 12 | 1 | ARTHUR | 16.5 | 75.6 | 30 | 1010 |
| 1990 | 7 24 | 12 | 2 | BERTHA | 34.0 | 75.0 | 20 | 1012 |
| 1990 | 7 24 | 18 | 2 | BERTHA | 33.6 | 73.8 | 20 | 1013 |
| 1990 | 7 25 | 0  | 2 | BERTHA | 33.0 | 72.7 | 20 | 1013 |
| 1990 | 7 25 | 6  | 2 | BERTHA | 32.1 | 71.9 | 20 | 1013 |
| 1990 | 7 25 | 12 | 2 | BERTHA | 31.2 | 71.8 | 20 | 1012 |
| 1990 | 7 25 | 18 | 2 | BERTHA | 30.7 | 72.2 | 25 | 1011 |
| 1990 | 7 26 | 0  | 2 | BERTHA | 30.5 | 72.8 | 25 | 1010 |
| 1990 | 7 26 | 6  | 2 | BERTHA | 30.3 | 73.4 | 25 | 1010 |
| 1990 | 7 26 | 12 | 2 | BERTHA | 30.1 | 74.0 | 25 | 1010 |
| 1990 | 7 26 | 18 | 2 | BERTHA | 29.8 | 74.6 | 25 | 1010 |
| 1990 | 7 27 | 0  | 2 | BERTHA | 29.6 | 75.2 | 25 | 1009 |
| 1990 | 7 27 | 6  | 2 | BERTHA | 29.3 | 75.6 | 30 | 1008 |
| 1990 | 7 27 | 12 | 2 | BERTHA | 29.1 | 75.8 | 30 | 1008 |
| 1990 | 7 27 | 18 | 2 | BERTHA | 28.8 | 76.0 | 30 | 1007 |
| 1990 | 7 28 | 0  | 2 | BERTHA | 28.6 | 75.8 | 35 | 1005 |
| 1990 | 7 28 | 6  | 2 | BERTHA | 28.8 | 75.4 | 40 | 1003 |
| 1990 | 7 28 | 12 | 2 | BERTHA | 29.1 | 74.8 | 45 | 1000 |
| 1990 | 7 28 | 18 | 2 | BERTHA | 29.6 | 74.2 | 55 | 995  |
| 1990 | 7 29 | 0  | 2 | BERTHA | 30.2 | 73.6 | 65 | 990  |
| 1990 | 7 29 | 6  | 2 | BERTHA | 30.8 | 73.0 | 65 | 988  |
| 1990 | 7 29 | 12 | 2 | BERTHA | 31.3 | 72.2 | 65 | 989  |
| 1990 | 7 29 | 18 | 2 | BERTHA | 31.9 | 71.2 | 60 | 990  |
| 1990 | 7 30 | 0  | 2 | BERTHA | 32.7 | 70.2 | 60 | 989  |
| 1990 | 7 30 | 6  | 2 | BERTHA | 33.7 | 69.2 | 60 | 987  |
| 1990 | 7 30 | 12 | 2 | BERTHA | 34.7 | 68.3 | 65 | 985  |
| 1990 | 7 30 | 18 | 2 | BERTHA | 35.7 | 67.5 | 65 | 979  |
| 1990 | 7 31 | 0  | 2 | BERTHA | 36.6 | 67.0 | 70 | 974  |
| 1990 | 7 31 | 6  | 2 | BERTHA | 37.5 | 66.5 | 65 | 975  |
| 1990 | 7 31 | 12 | 2 | BERTHA | 38.3 | 65.9 | 65 | 976  |
| 1990 | 7 31 | 18 | 2 | BERTHA | 39.0 | 65.3 | 65 | 977  |
| 1990 | 8 1  | 0  | 2 | BERTHA | 39.6 | 64.5 | 65 | 977  |
| 1990 | 8 1  | 6  | 2 | BERTHA | 40.3 | 63.7 | 65 | 977  |
| 1990 | 8 1  | 12 | 2 | BERTHA | 41.1 | 62.7 | 65 | 977  |
| 1990 | 8 1  | 18 | 2 | BERTHA | 42.4 | 61.5 | 65 | 975  |
| 1990 | 8 2  | 0  | 2 | BERTHA | 44.2 | 60.5 | 70 | 973  |
| 1990 | 8 2  | 6  | 2 | BERTHA | 46.0 | 60.0 | 60 | 978  |
| 1990 | 8 2  | 12 | 2 | BERTHA | 48.4 | 60.0 | 55 | 982  |



|      |   |    |    |   |       |      |      |    |      |
|------|---|----|----|---|-------|------|------|----|------|
| 1990 | 7 | 31 | 0  | 3 | CESAR | 10.1 | 22.2 | 25 | 1014 |
| 1990 | 7 | 31 | 6  | 3 | CESAR | 10.4 | 23.3 | 25 | 1013 |
| 1990 | 7 | 31 | 12 | 3 | CESAR | 10.8 | 24.5 | 25 | 1013 |
| 1990 | 7 | 31 | 18 | 3 | CESAR | 11.1 | 25.6 | 25 | 1013 |
| 1990 | 8 | 1  | 0  | 3 | CESAR | 11.5 | 26.9 | 25 | 1013 |
| 1990 | 8 | 1  | 6  | 3 | CESAR | 12.2 | 28.3 | 25 | 1012 |
| 1990 | 8 | 1  | 12 | 3 | CESAR | 13.4 | 29.7 | 30 | 1012 |
| 1990 | 8 | 1  | 18 | 3 | CESAR | 14.6 | 31.2 | 30 | 1009 |
| 1990 | 8 | 2  | 0  | 3 | CESAR | 15.4 | 32.3 | 35 | 1005 |
| 1990 | 8 | 2  | 6  | 3 | CESAR | 16.1 | 33.5 | 45 | 1002 |
| 1990 | 8 | 2  | 12 | 3 | CESAR | 16.7 | 34.7 | 45 | 1000 |
| 1990 | 8 | 2  | 18 | 3 | CESAR | 17.4 | 35.9 | 45 | 1000 |
| 1990 | 8 | 3  | 0  | 3 | CESAR | 18.1 | 37.1 | 45 | 1000 |
| 1990 | 8 | 3  | 6  | 3 | CESAR | 18.8 | 38.4 | 45 | 1000 |
| 1990 | 8 | 3  | 12 | 3 | CESAR | 19.3 | 39.7 | 45 | 1000 |
| 1990 | 8 | 3  | 18 | 3 | CESAR | 19.8 | 40.8 | 45 | 1000 |
| 1990 | 8 | 4  | 0  | 3 | CESAR | 20.4 | 41.9 | 45 | 1000 |
| 1990 | 8 | 4  | 6  | 3 | CESAR | 21.2 | 42.8 | 45 | 1000 |
| 1990 | 8 | 4  | 12 | 3 | CESAR | 22.0 | 43.5 | 45 | 1000 |
| 1990 | 8 | 4  | 18 | 3 | CESAR | 22.8 | 44.0 | 45 | 1000 |
| 1990 | 8 | 5  | 0  | 3 | CESAR | 23.6 | 44.5 | 45 | 1000 |
| 1990 | 8 | 5  | 6  | 3 | CESAR | 24.4 | 45.1 | 45 | 1000 |
| 1990 | 8 | 5  | 12 | 3 | CESAR | 25.3 | 45.7 | 45 | 1000 |
| 1990 | 8 | 5  | 18 | 3 | CESAR | 26.1 | 46.3 | 40 | 1002 |
| 1990 | 8 | 6  | 0  | 3 | CESAR | 26.6 | 46.7 | 40 | 1004 |
| 1990 | 8 | 6  | 6  | 3 | CESAR | 26.8 | 46.8 | 35 | 1006 |
| 1990 | 8 | 6  | 12 | 3 | CESAR | 26.9 | 46.8 | 30 | 1009 |
| 1990 | 8 | 6  | 18 | 3 | CESAR | 26.9 | 46.6 | 30 | 1011 |
| 1990 | 8 | 7  | 0  | 3 | CESAR | 26.9 | 46.4 | 25 | 1013 |
| 1990 | 8 | 7  | 6  | 3 | CESAR | 26.9 | 46.3 | 25 | 1014 |
| 1990 | 8 | 7  | 12 | 3 | CESAR | 26.8 | 46.3 | 25 | 1016 |
| 1990 | 8 | 4  | 0  | 4 | DIANA | 13.2 | 79.5 | 25 | 1009 |
| 1990 | 8 | 4  | 6  | 4 | DIANA | 13.9 | 80.8 | 25 | 1008 |
| 1990 | 8 | 4  | 12 | 4 | DIANA | 14.8 | 81.8 | 25 | 1007 |
| 1990 | 8 | 4  | 18 | 4 | DIANA | 15.7 | 82.6 | 30 | 1006 |
| 1990 | 8 | 5  | 0  | 4 | DIANA | 16.6 | 83.6 | 35 | 1005 |
| 1990 | 8 | 5  | 6  | 4 | DIANA | 17.4 | 84.8 | 40 | 1003 |
| 1990 | 8 | 5  | 12 | 4 | DIANA | 18.3 | 86.3 | 45 | 1000 |
| 1990 | 8 | 5  | 18 | 4 | DIANA | 19.1 | 87.6 | 55 | 994  |
| 1990 | 8 | 6  | 0  | 4 | DIANA | 19.7 | 88.7 | 45 | 1000 |
| 1990 | 8 | 6  | 6  | 4 | DIANA | 20.2 | 90.0 | 45 | 1000 |
| 1990 | 8 | 6  | 12 | 4 | DIANA | 20.5 | 91.1 | 45 | 1000 |
| 1990 | 8 | 6  | 18 | 4 | DIANA | 20.6 | 92.3 | 50 | 1000 |
| 1990 | 8 | 7  | 0  | 4 | DIANA | 20.6 | 93.6 | 60 | 998  |

|      |   |    |    |   |         |      |       |    |      |
|------|---|----|----|---|---------|------|-------|----|------|
| 1990 | 8 | 7  | 6  | 4 | DIANA   | 20.7 | 94.7  | 65 | 990  |
| 1990 | 8 | 7  | 12 | 4 | DIANA   | 20.8 | 95.8  | 75 | 986  |
| 1990 | 8 | 7  | 18 | 4 | DIANA   | 20.9 | 96.8  | 85 | 980  |
| 1990 | 8 | 8  | 0  | 4 | DIANA   | 20.8 | 98.1  | 55 | 1000 |
| 1990 | 8 | 8  | 6  | 4 | DIANA   | 20.7 | 99.4  | 50 | 1005 |
| 1990 | 8 | 8  | 12 | 4 | DIANA   | 20.8 | 100.8 | 30 | 1009 |
| 1990 | 8 | 8  | 18 | 4 | DIANA   | 21.1 | 102.2 | 25 | 1010 |
| 1990 | 8 | 9  | 0  | 4 | DIANA   | 21.6 | 103.4 | 25 | 1010 |
| 1990 | 8 | 9  | 6  | 4 | DIANA   | 22.0 | 104.9 | 20 | 1010 |
| 1990 | 8 | 9  | 12 | 4 | DIANA   | 22.5 | 107.0 | 20 | 1010 |
| 1990 | 8 | 2  | 18 | 5 | EDOUARD | 38.0 | 23.0  | 30 | 1015 |
| 1990 | 8 | 3  | 0  | 5 | EDOUARD | 38.3 | 23.0  | 30 | 1013 |
| 1990 | 8 | 3  | 6  | 5 | EDOUARD | 38.8 | 23.1  | 30 | 1010 |
| 1990 | 8 | 3  | 12 | 5 | EDOUARD | 39.2 | 23.3  | 35 | 1009 |
| 1990 | 8 | 3  | 18 | 5 | EDOUARD | 39.5 | 23.9  | 40 | 1006 |
| 1990 | 8 | 4  | 0  | 5 | EDOUARD | 39.7 | 25.3  | 40 | 1005 |
| 1990 | 8 | 4  | 6  | 5 | EDOUARD | 39.4 | 27.3  | 35 | 1006 |
| 1990 | 8 | 4  | 12 | 5 | EDOUARD | 38.8 | 29.0  | 35 | 1006 |
| 1990 | 8 | 4  | 18 | 5 | EDOUARD | 38.1 | 30.1  | 30 | 1007 |
| 1990 | 8 | 5  | 0  | 5 | EDOUARD | 37.6 | 30.8  | 30 | 1007 |
| 1990 | 8 | 5  | 6  | 5 | EDOUARD | 37.3 | 31.6  | 30 | 1007 |
| 1990 | 8 | 5  | 12 | 5 | EDOUARD | 37.1 | 32.5  | 30 | 1007 |
| 1990 | 8 | 5  | 18 | 5 | EDOUARD | 37.0 | 33.1  | 25 | 1009 |
| 1990 | 8 | 6  | 0  | 5 | EDOUARD | 37.0 | 33.4  | 25 | 1010 |
| 1990 | 8 | 6  | 6  | 5 | EDOUARD | 37.1 | 33.5  | 25 | 1010 |
| 1990 | 8 | 6  | 12 | 5 | EDOUARD | 37.2 | 33.5  | 25 | 1010 |
| 1990 | 8 | 6  | 18 | 5 | EDOUARD | 37.5 | 33.5  | 25 | 1010 |
| 1990 | 8 | 7  | 0  | 5 | EDOUARD | 37.5 | 33.7  | 25 | 1010 |
| 1990 | 8 | 7  | 6  | 5 | EDOUARD | 37.4 | 33.9  | 25 | 1008 |
| 1990 | 8 | 7  | 12 | 5 | EDOUARD | 37.1 | 34.2  | 25 | 1008 |
| 1990 | 8 | 7  | 18 | 5 | EDOUARD | 36.9 | 34.2  | 25 | 1008 |
| 1990 | 8 | 8  | 0  | 5 | EDOUARD | 36.9 | 34.0  | 30 | 1007 |
| 1990 | 8 | 8  | 6  | 5 | EDOUARD | 37.0 | 33.6  | 30 | 1007 |
| 1990 | 8 | 8  | 12 | 5 | EDOUARD | 37.1 | 33.0  | 30 | 1007 |
| 1990 | 8 | 8  | 18 | 5 | EDOUARD | 37.4 | 32.0  | 35 | 1005 |
| 1990 | 8 | 9  | 0  | 5 | EDOUARD | 37.8 | 30.8  | 35 | 1004 |
| 1990 | 8 | 9  | 6  | 5 | EDOUARD | 38.5 | 29.6  | 40 | 1003 |
| 1990 | 8 | 9  | 12 | 5 | EDOUARD | 39.2 | 28.6  | 35 | 1005 |
| 1990 | 8 | 9  | 18 | 5 | EDOUARD | 39.6 | 28.1  | 35 | 1006 |
| 1990 | 8 | 10 | 0  | 5 | EDOUARD | 39.7 | 27.7  | 35 | 1006 |
| 1990 | 8 | 10 | 6  | 5 | EDOUARD | 39.6 | 27.1  | 35 | 1007 |
| 1990 | 8 | 10 | 12 | 5 | EDOUARD | 39.3 | 26.1  | 30 | 1009 |
| 1990 | 8 | 10 | 18 | 5 | EDOUARD | 39.1 | 25.0  | 30 | 1010 |
| 1990 | 8 | 11 | 0  | 5 | EDOUARD | 39.0 | 23.8  | 30 | 1010 |

|      |      |    |           |      |      |         |
|------|------|----|-----------|------|------|---------|
| 1990 | 8 11 | 6  | 5 EDOUARD | 39.0 | 22.9 | 30 1010 |
| 1990 | 8 11 | 12 | 5 EDOUARD | 39.1 | 22.0 | 30 1010 |
| 1990 | 8 11 | 18 | 5 EDOUARD | 39.0 | 21.2 | 30 1010 |
| 1990 | 8 12 | 0  | 5 EDOUARD | 38.9 | 20.5 | 30 1010 |
| 1990 | 8 12 | 6  | 5 EDOUARD | 38.8 | 19.9 | 30 1010 |
| 1990 | 8 12 | 12 | 5 EDOUARD | 38.5 | 19.3 | 30 1010 |
| 1990 | 8 12 | 18 | 5 EDOUARD | 38.1 | 18.5 | 25 1011 |
| 1990 | 8 13 | 0  | 5 EDOUARD | 37.7 | 17.8 | 20 1012 |
| 1990 | 8 13 | 6  | 5 EDOUARD | 37.6 | 17.1 | 20 1012 |
| 1990 | 8 13 | 12 | 5 EDOUARD | 38.0 | 16.6 | 20 1014 |
| 1990 | 8 11 | 12 | 6 FRAN    | 9.0  | 32.1 | 25 1010 |
| 1990 | 8 11 | 18 | 6 FRAN    | 8.5  | 34.0 | 25 1009 |
| 1990 | 8 12 | 0  | 6 FRAN    | 8.3  | 36.2 | 30 1009 |
| 1990 | 8 12 | 6  | 6 FRAN    | 8.2  | 39.0 | 30 1009 |
| 1990 | 8 12 | 12 | 6 FRAN    | 8.0  | 42.0 | 30 1009 |
| 1990 | 8 12 | 18 | 6 FRAN    | 7.9  | 44.6 | 25 1010 |
| 1990 | 8 13 | 0  | 6 FRAN    | 8.2  | 46.8 | 15 0    |
| 1990 | 8 13 | 6  | 6 FRAN    | 8.4  | 48.9 | 15 0    |
| 1990 | 8 13 | 12 | 6 FRAN    | 8.7  | 51.1 | 30 1010 |
| 1990 | 8 13 | 18 | 6 FRAN    | 9.0  | 53.6 | 35 1010 |
| 1990 | 8 14 | 0  | 6 FRAN    | 9.2  | 56.0 | 35 1009 |
| 1990 | 8 14 | 6  | 6 FRAN    | 9.7  | 59.0 | 35 1008 |
| 1990 | 8 14 | 12 | 6 FRAN    | 10.2 | 61.3 | 35 1007 |
| 1990 | 8 24 | 6  | 7 GUSTAV  | 12.6 | 45.9 | 25 1010 |
| 1990 | 8 24 | 12 | 7 GUSTAV  | 12.9 | 46.9 | 30 1009 |
| 1990 | 8 24 | 18 | 7 GUSTAV  | 13.2 | 48.0 | 30 1007 |
| 1990 | 8 25 | 0  | 7 GUSTAV  | 13.3 | 49.0 | 35 1005 |
| 1990 | 8 25 | 6  | 7 GUSTAV  | 13.5 | 50.1 | 40 1004 |
| 1990 | 8 25 | 12 | 7 GUSTAV  | 13.7 | 51.2 | 45 1002 |
| 1990 | 8 25 | 18 | 7 GUSTAV  | 13.8 | 52.3 | 50 1000 |
| 1990 | 8 26 | 0  | 7 GUSTAV  | 14.0 | 53.3 | 55 997  |
| 1990 | 8 26 | 6  | 7 GUSTAV  | 14.2 | 54.4 | 60 993  |
| 1990 | 8 26 | 12 | 7 GUSTAV  | 14.5 | 55.5 | 65 990  |
| 1990 | 8 26 | 18 | 7 GUSTAV  | 15.0 | 56.4 | 70 984  |
| 1990 | 8 27 | 0  | 7 GUSTAV  | 15.3 | 57.0 | 75 980  |
| 1990 | 8 27 | 6  | 7 GUSTAV  | 15.9 | 57.7 | 85 973  |
| 1990 | 8 27 | 12 | 7 GUSTAV  | 16.6 | 58.0 | 90 967  |
| 1990 | 8 27 | 18 | 7 GUSTAV  | 17.3 | 58.2 | 95 965  |
| 1990 | 8 28 | 0  | 7 GUSTAV  | 18.1 | 58.2 | 95 966  |
| 1990 | 8 28 | 6  | 7 GUSTAV  | 19.0 | 58.1 | 90 969  |
| 1990 | 8 28 | 12 | 7 GUSTAV  | 20.0 | 58.0 | 85 973  |
| 1990 | 8 28 | 18 | 7 GUSTAV  | 21.1 | 58.0 | 80 978  |
| 1990 | 8 29 | 0  | 7 GUSTAV  | 22.2 | 57.8 | 75 981  |
| 1990 | 8 29 | 6  | 7 GUSTAV  | 22.9 | 57.8 | 70 984  |

|      |         |            |      |      |     |      |
|------|---------|------------|------|------|-----|------|
| 1990 | 8 29 12 | 7 GUSTAV   | 23.7 | 57.8 | 75  | 982  |
| 1990 | 8 29 18 | 7 GUSTAV   | 24.4 | 57.8 | 75  | 979  |
| 1990 | 8 30 0  | 7 GUSTAV   | 25.2 | 57.8 | 80  | 975  |
| 1990 | 8 30 6  | 7 GUSTAV   | 26.0 | 57.8 | 85  | 972  |
| 1990 | 8 30 12 | 7 GUSTAV   | 27.0 | 57.8 | 90  | 968  |
| 1990 | 8 30 18 | 7 GUSTAV   | 27.8 | 57.8 | 95  | 963  |
| 1990 | 8 31 0  | 7 GUSTAV   | 28.9 | 57.7 | 100 | 958  |
| 1990 | 8 31 6  | 7 GUSTAV   | 30.3 | 57.5 | 105 | 956  |
| 1990 | 8 31 12 | 7 GUSTAV   | 31.7 | 57.2 | 100 | 959  |
| 1990 | 8 31 18 | 7 GUSTAV   | 33.0 | 56.5 | 100 | 961  |
| 1990 | 9 1 0   | 7 GUSTAV   | 34.4 | 55.6 | 95  | 964  |
| 1990 | 9 1 6   | 7 GUSTAV   | 35.6 | 54.5 | 90  | 967  |
| 1990 | 9 1 12  | 7 GUSTAV   | 36.8 | 53.2 | 85  | 970  |
| 1990 | 9 1 18  | 7 GUSTAV   | 38.0 | 52.0 | 80  | 974  |
| 1990 | 9 2 0   | 7 GUSTAV   | 39.4 | 50.9 | 75  | 978  |
| 1990 | 9 2 6   | 7 GUSTAV   | 40.7 | 49.8 | 70  | 982  |
| 1990 | 9 2 12  | 7 GUSTAV   | 42.1 | 48.6 | 65  | 985  |
| 1990 | 9 2 18  | 7 GUSTAV   | 43.8 | 48.0 | 60  | 988  |
| 1990 | 9 3 0   | 7 GUSTAV   | 46.0 | 46.5 | 55  | 993  |
| 1990 | 9 3 6   | 7 GUSTAV   | 48.5 | 44.5 | 55  | 997  |
| 1990 | 8 25 0  | 8 HORTENSE | 12.5 | 35.0 | 25  | 1010 |
| 1990 | 8 25 6  | 8 HORTENSE | 12.9 | 36.1 | 30  | 1009 |
| 1990 | 8 25 12 | 8 HORTENSE | 13.3 | 37.3 | 30  | 1008 |
| 1990 | 8 25 18 | 8 HORTENSE | 13.7 | 38.5 | 30  | 1008 |
| 1990 | 8 26 0  | 8 HORTENSE | 13.9 | 39.4 | 30  | 1007 |
| 1990 | 8 26 6  | 8 HORTENSE | 14.4 | 40.0 | 35  | 1005 |
| 1990 | 8 26 12 | 8 HORTENSE | 15.4 | 40.2 | 35  | 1004 |
| 1990 | 8 26 18 | 8 HORTENSE | 16.5 | 40.3 | 40  | 1003 |
| 1990 | 8 27 0  | 8 HORTENSE | 17.4 | 40.5 | 40  | 1002 |
| 1990 | 8 27 6  | 8 HORTENSE | 18.1 | 41.0 | 45  | 1001 |
| 1990 | 8 27 12 | 8 HORTENSE | 18.9 | 41.7 | 45  | 999  |
| 1990 | 8 27 18 | 8 HORTENSE | 20.0 | 42.5 | 50  | 997  |
| 1990 | 8 28 0  | 8 HORTENSE | 21.0 | 43.2 | 50  | 996  |
| 1990 | 8 28 6  | 8 HORTENSE | 21.7 | 43.6 | 55  | 994  |
| 1990 | 8 28 12 | 8 HORTENSE | 22.3 | 44.1 | 55  | 993  |
| 1990 | 8 28 18 | 8 HORTENSE | 22.8 | 44.9 | 55  | 994  |
| 1990 | 8 29 0  | 8 HORTENSE | 23.5 | 45.7 | 55  | 994  |
| 1990 | 8 29 6  | 8 HORTENSE | 24.4 | 46.6 | 50  | 995  |
| 1990 | 8 29 12 | 8 HORTENSE | 25.4 | 47.6 | 45  | 999  |
| 1990 | 8 29 18 | 8 HORTENSE | 26.6 | 48.6 | 35  | 1003 |
| 1990 | 8 30 0  | 8 HORTENSE | 27.9 | 49.5 | 30  | 1005 |
| 1990 | 8 30 6  | 8 HORTENSE | 29.3 | 50.2 | 30  | 1006 |
| 1990 | 8 30 12 | 8 HORTENSE | 31.0 | 50.9 | 30  | 1008 |
| 1990 | 8 30 18 | 8 HORTENSE | 32.8 | 51.6 | 25  | 1010 |

|      |   |    |    |   |          |      |      |    |      |
|------|---|----|----|---|----------|------|------|----|------|
| 1990 | 8 | 31 | 0  | 8 | HORTENSE | 34.4 | 51.7 | 25 | 1012 |
| 1990 | 8 | 31 | 6  | 8 | HORTENSE | 36.2 | 51.2 | 20 | 1014 |
| 1990 | 9 | 4  | 0  | 9 | ISIDORE  | 7.2  | 23.4 | 25 | 1010 |
| 1990 | 9 | 4  | 6  | 9 | ISIDORE  | 7.4  | 25.1 | 25 | 1010 |
| 1990 | 9 | 4  | 12 | 9 | ISIDORE  | 8.4  | 26.7 | 25 | 1009 |
| 1990 | 9 | 4  | 18 | 9 | ISIDORE  | 9.2  | 28.4 | 30 | 1009 |
| 1990 | 9 | 5  | 0  | 9 | ISIDORE  | 9.7  | 29.9 | 30 | 1009 |
| 1990 | 9 | 5  | 6  | 9 | ISIDORE  | 9.9  | 31.4 | 30 | 1008 |
| 1990 | 9 | 5  | 12 | 9 | ISIDORE  | 10.0 | 32.7 | 35 | 1007 |
| 1990 | 9 | 5  | 18 | 9 | ISIDORE  | 10.4 | 33.8 | 40 | 1005 |
| 1990 | 9 | 6  | 0  | 9 | ISIDORE  | 11.3 | 34.7 | 45 | 1004 |
| 1990 | 9 | 6  | 6  | 9 | ISIDORE  | 12.4 | 35.4 | 50 | 1003 |
| 1990 | 9 | 6  | 12 | 9 | ISIDORE  | 13.5 | 36.0 | 55 | 1000 |
| 1990 | 9 | 6  | 18 | 9 | ISIDORE  | 14.7 | 36.4 | 60 | 997  |
| 1990 | 9 | 7  | 0  | 9 | ISIDORE  | 15.9 | 36.8 | 65 | 994  |
| 1990 | 9 | 7  | 6  | 9 | ISIDORE  | 17.2 | 37.3 | 75 | 983  |
| 1990 | 9 | 7  | 12 | 9 | ISIDORE  | 18.5 | 37.6 | 85 | 978  |
| 1990 | 9 | 7  | 18 | 9 | ISIDORE  | 19.9 | 37.9 | 80 | 979  |
| 1990 | 9 | 8  | 0  | 9 | ISIDORE  | 21.1 | 38.2 | 75 | 979  |
| 1990 | 9 | 8  | 6  | 9 | ISIDORE  | 22.2 | 38.7 | 70 | 985  |
| 1990 | 9 | 8  | 12 | 9 | ISIDORE  | 23.2 | 39.3 | 65 | 994  |
| 1990 | 9 | 8  | 18 | 9 | ISIDORE  | 24.3 | 40.0 | 60 | 996  |
| 1990 | 9 | 9  | 0  | 9 | ISIDORE  | 25.6 | 40.7 | 55 | 999  |
| 1990 | 9 | 9  | 6  | 9 | ISIDORE  | 26.8 | 41.7 | 50 | 1000 |
| 1990 | 9 | 9  | 12 | 9 | ISIDORE  | 27.9 | 43.0 | 55 | 995  |
| 1990 | 9 | 9  | 18 | 9 | ISIDORE  | 28.6 | 44.2 | 65 | 990  |
| 1990 | 9 | 10 | 0  | 9 | ISIDORE  | 29.0 | 45.1 | 65 | 987  |
| 1990 | 9 | 10 | 6  | 9 | ISIDORE  | 29.4 | 45.6 | 65 | 987  |
| 1990 | 9 | 10 | 12 | 9 | ISIDORE  | 29.8 | 46.1 | 65 | 987  |
| 1990 | 9 | 10 | 18 | 9 | ISIDORE  | 30.1 | 46.6 | 65 | 987  |
| 1990 | 9 | 11 | 0  | 9 | ISIDORE  | 30.6 | 47.0 | 65 | 987  |
| 1990 | 9 | 11 | 6  | 9 | ISIDORE  | 31.2 | 47.4 | 75 | 984  |
| 1990 | 9 | 11 | 12 | 9 | ISIDORE  | 31.9 | 48.0 | 80 | 980  |
| 1990 | 9 | 11 | 18 | 9 | ISIDORE  | 32.6 | 48.7 | 80 | 979  |
| 1990 | 9 | 12 | 0  | 9 | ISIDORE  | 33.1 | 49.5 | 75 | 979  |
| 1990 | 9 | 12 | 6  | 9 | ISIDORE  | 33.4 | 50.1 | 75 | 980  |
| 1990 | 9 | 12 | 12 | 9 | ISIDORE  | 33.6 | 50.4 | 70 | 986  |
| 1990 | 9 | 12 | 18 | 9 | ISIDORE  | 33.8 | 50.6 | 65 | 987  |
| 1990 | 9 | 13 | 0  | 9 | ISIDORE  | 34.1 | 50.7 | 65 | 987  |
| 1990 | 9 | 13 | 6  | 9 | ISIDORE  | 34.4 | 50.8 | 65 | 987  |
| 1990 | 9 | 13 | 12 | 9 | ISIDORE  | 34.9 | 50.8 | 65 | 987  |
| 1990 | 9 | 13 | 18 | 9 | ISIDORE  | 35.4 | 50.6 | 65 | 987  |
| 1990 | 9 | 14 | 0  | 9 | ISIDORE  | 35.8 | 50.1 | 65 | 987  |
| 1990 | 9 | 14 | 6  | 9 | ISIDORE  | 36.2 | 49.4 | 65 | 987  |

|      |   |    |    |    |           |      |      |    |      |
|------|---|----|----|----|-----------|------|------|----|------|
| 1990 | 9 | 14 | 12 | 9  | ISIDORE   | 36.6 | 48.7 | 65 | 987  |
| 1990 | 9 | 14 | 18 | 9  | ISIDORE   | 37.1 | 47.9 | 65 | 987  |
| 1990 | 9 | 15 | 0  | 9  | ISIDORE   | 37.8 | 47.4 | 65 | 987  |
| 1990 | 9 | 15 | 6  | 9  | ISIDORE   | 38.7 | 47.2 | 65 | 987  |
| 1990 | 9 | 15 | 12 | 9  | ISIDORE   | 39.6 | 47.5 | 65 | 987  |
| 1990 | 9 | 15 | 18 | 9  | ISIDORE   | 40.3 | 48.0 | 65 | 987  |
| 1990 | 9 | 16 | 0  | 9  | ISIDORE   | 40.5 | 48.5 | 65 | 987  |
| 1990 | 9 | 16 | 6  | 9  | ISIDORE   | 41.8 | 47.9 | 60 | 990  |
| 1990 | 9 | 16 | 12 | 9  | ISIDORE   | 43.5 | 47.0 | 55 | 995  |
| 1990 | 9 | 16 | 18 | 9  | ISIDORE   | 45.0 | 45.5 | 45 | 997  |
| 1990 | 9 | 17 | 0  | 9  | ISIDORE   | 46.5 | 43.5 | 45 | 1000 |
| 1990 | 9 | 17 | 6  | 9  | ISIDORE   | 48.2 | 41.5 | 35 | 1005 |
| 1990 | 9 | 17 | 12 | 9  | ISIDORE   | 50.0 | 39.5 | 35 | 1006 |
| 1990 | 9 | 21 | 6  | 10 | JOSEPHINE | 14.0 | 32.0 | 30 | 1009 |
| 1990 | 9 | 21 | 12 | 10 | JOSEPHINE | 14.5 | 32.4 | 30 | 1009 |
| 1990 | 9 | 21 | 18 | 10 | JOSEPHINE | 15.0 | 32.7 | 30 | 1008 |
| 1990 | 9 | 22 | 0  | 10 | JOSEPHINE | 15.6 | 33.0 | 30 | 1007 |
| 1990 | 9 | 22 | 6  | 10 | JOSEPHINE | 16.1 | 33.2 | 30 | 1007 |
| 1990 | 9 | 22 | 12 | 10 | JOSEPHINE | 16.7 | 33.4 | 30 | 1007 |
| 1990 | 9 | 22 | 18 | 10 | JOSEPHINE | 17.4 | 33.4 | 30 | 1007 |
| 1990 | 9 | 23 | 0  | 10 | JOSEPHINE | 17.9 | 33.5 | 30 | 1009 |
| 1990 | 9 | 23 | 6  | 10 | JOSEPHINE | 18.2 | 33.6 | 30 | 1009 |
| 1990 | 9 | 23 | 12 | 10 | JOSEPHINE | 18.5 | 33.8 | 30 | 1009 |
| 1990 | 9 | 23 | 18 | 10 | JOSEPHINE | 18.7 | 34.0 | 30 | 1009 |
| 1990 | 9 | 24 | 0  | 10 | JOSEPHINE | 19.0 | 34.1 | 30 | 1008 |
| 1990 | 9 | 24 | 6  | 10 | JOSEPHINE | 19.1 | 34.1 | 30 | 1007 |
| 1990 | 9 | 24 | 12 | 10 | JOSEPHINE | 19.3 | 34.2 | 35 | 1005 |
| 1990 | 9 | 24 | 18 | 10 | JOSEPHINE | 19.4 | 34.4 | 35 | 1005 |
| 1990 | 9 | 25 | 0  | 10 | JOSEPHINE | 19.5 | 34.6 | 40 | 1003 |
| 1990 | 9 | 25 | 6  | 10 | JOSEPHINE | 19.7 | 34.8 | 40 | 1002 |
| 1990 | 9 | 25 | 12 | 10 | JOSEPHINE | 19.9 | 35.2 | 40 | 1003 |
| 1990 | 9 | 25 | 18 | 10 | JOSEPHINE | 20.1 | 35.9 | 35 | 1005 |
| 1990 | 9 | 26 | 0  | 10 | JOSEPHINE | 20.3 | 36.8 | 35 | 1006 |
| 1990 | 9 | 26 | 6  | 10 | JOSEPHINE | 20.4 | 37.6 | 30 | 1008 |
| 1990 | 9 | 26 | 12 | 10 | JOSEPHINE | 20.3 | 38.4 | 30 | 1009 |
| 1990 | 9 | 26 | 18 | 10 | JOSEPHINE | 20.2 | 38.9 | 30 | 1009 |
| 1990 | 9 | 27 | 0  | 10 | JOSEPHINE | 20.2 | 39.3 | 30 | 1009 |
| 1990 | 9 | 27 | 6  | 10 | JOSEPHINE | 20.2 | 39.6 | 30 | 1010 |
| 1990 | 9 | 27 | 12 | 10 | JOSEPHINE | 20.3 | 40.0 | 25 | 1012 |
| 1990 | 9 | 27 | 18 | 10 | JOSEPHINE | 20.4 | 40.4 | 25 | 1012 |
| 1990 | 9 | 28 | 0  | 10 | JOSEPHINE | 20.6 | 40.6 | 25 | 1012 |
| 1990 | 9 | 28 | 6  | 10 | JOSEPHINE | 20.9 | 40.9 | 25 | 1012 |
| 1990 | 9 | 28 | 12 | 10 | JOSEPHINE | 21.2 | 41.2 | 25 | 1012 |
| 1990 | 9 | 28 | 18 | 10 | JOSEPHINE | 21.6 | 41.6 | 25 | 1012 |

|      |    |    |    |    |           |      |      |    |      |
|------|----|----|----|----|-----------|------|------|----|------|
| 1990 | 9  | 29 | 0  | 10 | JOSEPHINE | 22.0 | 42.1 | 25 | 1012 |
| 1990 | 9  | 29 | 6  | 10 | JOSEPHINE | 22.5 | 42.8 | 25 | 1012 |
| 1990 | 9  | 29 | 12 | 10 | JOSEPHINE | 23.1 | 43.6 | 25 | 1010 |
| 1990 | 9  | 29 | 18 | 10 | JOSEPHINE | 23.8 | 44.3 | 30 | 1009 |
| 1990 | 9  | 30 | 0  | 10 | JOSEPHINE | 24.5 | 45.0 | 30 | 1009 |
| 1990 | 9  | 30 | 6  | 10 | JOSEPHINE | 25.5 | 45.4 | 30 | 1009 |
| 1990 | 9  | 30 | 12 | 10 | JOSEPHINE | 26.7 | 45.5 | 30 | 1009 |
| 1990 | 9  | 30 | 18 | 10 | JOSEPHINE | 27.8 | 45.3 | 30 | 1009 |
| 1990 | 10 | 1  | 0  | 10 | JOSEPHINE | 28.5 | 44.8 | 30 | 1009 |
| 1990 | 10 | 1  | 6  | 10 | JOSEPHINE | 29.1 | 43.8 | 30 | 1007 |
| 1990 | 10 | 1  | 12 | 10 | JOSEPHINE | 29.6 | 42.4 | 35 | 1005 |
| 1990 | 10 | 1  | 18 | 10 | JOSEPHINE | 29.9 | 41.1 | 35 | 1005 |
| 1990 | 10 | 2  | 0  | 10 | JOSEPHINE | 30.0 | 40.0 | 35 | 1005 |
| 1990 | 10 | 2  | 6  | 10 | JOSEPHINE | 30.0 | 39.4 | 35 | 1004 |
| 1990 | 10 | 2  | 12 | 10 | JOSEPHINE | 29.8 | 39.2 | 40 | 1003 |
| 1990 | 10 | 2  | 18 | 10 | JOSEPHINE | 29.6 | 39.2 | 35 | 1005 |
| 1990 | 10 | 3  | 0  | 10 | JOSEPHINE | 29.4 | 39.4 | 35 | 1005 |
| 1990 | 10 | 3  | 6  | 10 | JOSEPHINE | 29.1 | 40.0 | 35 | 1005 |
| 1990 | 10 | 3  | 12 | 10 | JOSEPHINE | 28.6 | 40.7 | 35 | 1005 |
| 1990 | 10 | 3  | 18 | 10 | JOSEPHINE | 28.3 | 41.4 | 40 | 1003 |
| 1990 | 10 | 4  | 0  | 10 | JOSEPHINE | 28.2 | 42.1 | 45 | 1000 |
| 1990 | 10 | 4  | 6  | 10 | JOSEPHINE | 28.5 | 42.5 | 50 | 997  |
| 1990 | 10 | 4  | 12 | 10 | JOSEPHINE | 29.0 | 42.6 | 55 | 994  |
| 1990 | 10 | 4  | 18 | 10 | JOSEPHINE | 29.5 | 42.3 | 60 | 990  |
| 1990 | 10 | 5  | 0  | 10 | JOSEPHINE | 30.0 | 41.5 | 65 | 987  |
| 1990 | 10 | 5  | 6  | 10 | JOSEPHINE | 30.7 | 40.5 | 65 | 986  |
| 1990 | 10 | 5  | 12 | 10 | JOSEPHINE | 32.1 | 39.3 | 70 | 984  |
| 1990 | 10 | 5  | 18 | 10 | JOSEPHINE | 34.1 | 38.4 | 75 | 980  |
| 1990 | 10 | 6  | 0  | 10 | JOSEPHINE | 36.5 | 38.5 | 70 | 984  |
| 1990 | 10 | 6  | 6  | 10 | JOSEPHINE | 38.9 | 40.0 | 70 | 985  |
| 1990 | 10 | 6  | 12 | 10 | JOSEPHINE | 41.0 | 42.9 | 60 | 990  |
| 1990 | 10 | 3  | 12 | 11 | KLAUS     | 15.6 | 59.3 | 30 | 1008 |
| 1990 | 10 | 3  | 18 | 11 | KLAUS     | 16.2 | 59.6 | 35 | 1007 |
| 1990 | 10 | 4  | 0  | 11 | KLAUS     | 16.4 | 59.8 | 45 | 1005 |
| 1990 | 10 | 4  | 6  | 11 | KLAUS     | 16.5 | 60.1 | 50 | 997  |
| 1990 | 10 | 4  | 12 | 11 | KLAUS     | 16.6 | 60.4 | 50 | 997  |
| 1990 | 10 | 4  | 18 | 11 | KLAUS     | 16.8 | 60.7 | 55 | 997  |
| 1990 | 10 | 5  | 0  | 11 | KLAUS     | 16.9 | 60.9 | 55 | 996  |
| 1990 | 10 | 5  | 6  | 11 | KLAUS     | 17.0 | 61.1 | 60 | 993  |
| 1990 | 10 | 5  | 12 | 11 | KLAUS     | 17.2 | 61.2 | 70 | 985  |
| 1990 | 10 | 5  | 18 | 11 | KLAUS     | 17.4 | 61.4 | 70 | 991  |
| 1990 | 10 | 6  | 0  | 11 | KLAUS     | 17.7 | 61.6 | 65 | 992  |
| 1990 | 10 | 6  | 6  | 11 | KLAUS     | 18.1 | 61.8 | 60 | 994  |
| 1990 | 10 | 6  | 12 | 11 | KLAUS     | 18.3 | 62.1 | 60 | 995  |

|                       |      |      |    |      |
|-----------------------|------|------|----|------|
| 1990 10 6 18 11 KLAUS | 18.6 | 62.3 | 55 | 996  |
| 1990 10 7 0 11 KLAUS  | 18.7 | 62.7 | 55 | 998  |
| 1990 10 7 6 11 KLAUS  | 18.8 | 63.1 | 55 | 1000 |
| 1990 10 7 12 11 KLAUS | 18.9 | 63.8 | 50 | 1001 |
| 1990 10 7 18 11 KLAUS | 19.2 | 64.9 | 40 | 1004 |
| 1990 10 8 0 11 KLAUS  | 19.7 | 66.1 | 30 | 1005 |
| 1990 10 8 6 11 KLAUS  | 20.4 | 67.5 | 30 | 1005 |
| 1990 10 8 12 11 KLAUS | 21.1 | 68.9 | 40 | 1005 |
| 1990 10 8 18 11 KLAUS | 21.9 | 70.1 | 45 | 1004 |
| 1990 10 9 0 11 KLAUS  | 22.6 | 71.2 | 45 | 1004 |
| 1990 10 9 6 11 KLAUS  | 23.4 | 72.3 | 45 | 1006 |
| 1990 10 9 12 11 KLAUS | 24.5 | 73.4 | 35 | 1007 |
| 1990 10 6 6 12 LILI   | 36.0 | 44.0 | 45 | 1000 |
| 1990 10 6 12 12 LILI  | 35.7 | 44.1 | 50 | 999  |
| 1990 10 6 18 12 LILI  | 35.3 | 44.2 | 50 | 998  |
| 1990 10 7 0 12 LILI   | 35.0 | 44.4 | 50 | 998  |
| 1990 10 7 6 12 LILI   | 34.7 | 44.5 | 45 | 999  |
| 1990 10 7 12 12 LILI  | 34.4 | 44.6 | 45 | 1000 |
| 1990 10 7 18 12 LILI  | 34.1 | 44.8 | 45 | 1000 |
| 1990 10 8 0 12 LILI   | 33.8 | 45.0 | 45 | 1000 |
| 1990 10 8 6 12 LILI   | 33.5 | 45.3 | 50 | 998  |
| 1990 10 8 12 12 LILI  | 32.8 | 46.0 | 50 | 996  |
| 1990 10 8 18 12 LILI  | 32.2 | 46.8 | 55 | 994  |
| 1990 10 9 0 12 LILI   | 31.6 | 47.6 | 60 | 992  |
| 1990 10 9 6 12 LILI   | 31.3 | 48.3 | 60 | 995  |
| 1990 10 9 12 12 LILI  | 31.1 | 48.8 | 50 | 997  |
| 1990 10 9 18 12 LILI  | 31.0 | 49.2 | 50 | 998  |
| 1990 10 10 0 12 LILI  | 31.0 | 49.5 | 50 | 998  |
| 1990 10 10 6 12 LILI  | 30.9 | 50.1 | 50 | 996  |
| 1990 10 10 12 12 LILI | 31.0 | 51.3 | 55 | 992  |
| 1990 10 10 18 12 LILI | 31.3 | 53.4 | 60 | 989  |
| 1990 10 11 0 12 LILI  | 31.2 | 55.9 | 65 | 987  |
| 1990 10 11 6 12 LILI  | 31.0 | 58.7 | 65 | 987  |
| 1990 10 11 12 12 LILI | 30.7 | 61.3 | 65 | 988  |
| 1990 10 11 18 12 LILI | 30.3 | 64.1 | 65 | 990  |
| 1990 10 12 0 12 LILI  | 29.9 | 66.4 | 65 | 995  |
| 1990 10 12 6 12 LILI  | 29.8 | 68.5 | 65 | 995  |
| 1990 10 12 12 12 LILI | 30.2 | 70.3 | 65 | 994  |
| 1990 10 12 18 12 LILI | 30.9 | 71.4 | 65 | 993  |
| 1990 10 13 0 12 LILI  | 32.1 | 72.1 | 65 | 992  |
| 1990 10 13 6 12 LILI  | 33.2 | 72.5 | 65 | 992  |
| 1990 10 13 12 12 LILI | 34.3 | 72.4 | 60 | 995  |
| 1990 10 13 18 12 LILI | 35.5 | 72.0 | 50 | 997  |
| 1990 10 14 0 12 LILI  | 36.6 | 71.3 | 50 | 996  |



|                        |      |      |    |      |
|------------------------|------|------|----|------|
| 1990 10 14 6 12 LILI   | 38.0 | 69.7 | 50 | 995  |
| 1990 10 14 12 12 LILI  | 40.0 | 67.5 | 50 | 995  |
| 1990 10 14 18 12 LILI  | 42.4 | 65.0 | 45 | 995  |
| 1990 10 15 0 12 LILI   | 44.9 | 61.0 | 40 | 995  |
| 1990 10 15 6 12 LILI   | 46.6 | 56.4 | 40 | 994  |
| 1990 10 15 12 12 LILI  | 47.5 | 51.0 | 40 | 994  |
| 1990 10 9 12 13 MARCO  | 22.5 | 79.5 | 25 | 1004 |
| 1990 10 9 18 13 MARCO  | 22.7 | 80.7 | 30 | 1002 |
| 1990 10 10 0 13 MARCO  | 23.5 | 81.4 | 30 | 1000 |
| 1990 10 10 6 13 MARCO  | 24.1 | 82.0 | 35 | 996  |
| 1990 10 10 12 13 MARCO | 24.6 | 82.4 | 40 | 998  |
| 1990 10 10 18 13 MARCO | 25.2 | 82.5 | 45 | 994  |
| 1990 10 11 0 13 MARCO  | 26.0 | 82.6 | 50 | 993  |
| 1990 10 11 6 13 MARCO  | 26.7 | 82.6 | 55 | 989  |
| 1990 10 11 12 13 MARCO | 27.5 | 82.8 | 50 | 994  |
| 1990 10 11 18 13 MARCO | 28.3 | 83.0 | 40 | 998  |
| 1990 10 12 0 13 MARCO  | 29.1 | 83.1 | 30 | 999  |
| 1990 10 12 6 13 MARCO  | 30.7 | 83.0 | 20 | 1004 |
| 1990 10 12 12 13 MARCO | 32.0 | 83.0 | 20 | 1005 |
| 1990 10 12 18 13 MARCO | 33.2 | 82.6 | 15 | 1005 |
| 1990 10 13 0 13 MARCO  | 33.7 | 81.9 | 15 | 1006 |
| 1990 10 13 6 13 MARCO  | 33.8 | 81.5 | 15 | 1007 |
| 1990 10 13 12 13 MARCO | 34.0 | 81.0 | 15 | 1007 |
| 1990 10 16 0 14 NANA   | 22.2 | 60.4 | 25 | 1009 |
| 1990 10 16 6 14 NANA   | 22.3 | 60.8 | 30 | 1008 |
| 1990 10 16 12 14 NANA  | 22.3 | 61.4 | 30 | 1006 |
| 1990 10 16 18 14 NANA  | 22.1 | 62.1 | 35 | 1005 |
| 1990 10 17 0 14 NANA   | 22.1 | 62.5 | 40 | 1004 |
| 1990 10 17 6 14 NANA   | 22.1 | 62.8 | 45 | 1003 |
| 1990 10 17 12 14 NANA  | 22.4 | 63.2 | 55 | 1000 |
| 1990 10 17 18 14 NANA  | 22.8 | 63.5 | 65 | 995  |
| 1990 10 18 0 14 NANA   | 23.4 | 63.6 | 70 | 990  |
| 1990 10 18 6 14 NANA   | 24.1 | 63.8 | 75 | 990  |
| 1990 10 18 12 14 NANA  | 25.0 | 64.2 | 75 | 994  |
| 1990 10 18 18 14 NANA  | 26.1 | 64.9 | 70 | 994  |
| 1990 10 19 0 14 NANA   | 27.1 | 65.7 | 65 | 993  |
| 1990 10 19 6 14 NANA   | 27.9 | 66.3 | 70 | 992  |
| 1990 10 19 12 14 NANA  | 28.5 | 66.9 | 75 | 989  |
| 1990 10 19 18 14 NANA  | 28.9 | 66.5 | 70 | 991  |
| 1990 10 20 0 14 NANA   | 29.2 | 66.2 | 60 | 998  |
| 1990 10 20 6 14 NANA   | 29.5 | 65.8 | 50 | 1000 |
| 1990 10 20 12 14 NANA  | 29.6 | 65.5 | 40 | 1003 |
| 1990 10 20 18 14 NANA  | 29.3 | 65.4 | 35 | 1005 |
| 1990 10 21 0 14 NANA   | 28.8 | 64.8 | 30 | 1008 |

|                       |      |      |     |      |
|-----------------------|------|------|-----|------|
| 1990 10 21 6 14 NANA  | 28.8 | 64.5 | 25  | 1010 |
| 1990 10 21 12 14 NANA | 27.7 | 64.9 | 20  | 1010 |
| 1991 6 29 12 1 ANA    | 25.9 | 78.0 | 20  | 1012 |
| 1991 6 29 18 1 ANA    | 25.9 | 79.0 | 20  | 1012 |
| 1991 6 30 0 1 ANA     | 25.9 | 80.0 | 20  | 1012 |
| 1991 6 30 6 1 ANA     | 26.0 | 80.9 | 20  | 1012 |
| 1991 6 30 12 1 ANA    | 26.2 | 81.8 | 20  | 1012 |
| 1991 6 30 18 1 ANA    | 26.7 | 82.4 | 20  | 1012 |
| 1991 7 1 0 1 ANA      | 27.3 | 82.7 | 20  | 1012 |
| 1991 7 1 6 1 ANA      | 28.0 | 82.7 | 20  | 1012 |
| 1991 7 1 12 1 ANA     | 28.7 | 82.5 | 20  | 1012 |
| 1991 7 1 18 1 ANA     | 29.3 | 82.2 | 20  | 1012 |
| 1991 7 2 0 1 ANA      | 29.9 | 81.6 | 20  | 1012 |
| 1991 7 2 6 1 ANA      | 30.4 | 81.0 | 20  | 1012 |
| 1991 7 2 12 1 ANA     | 30.9 | 80.3 | 20  | 1012 |
| 1991 7 2 18 1 ANA     | 31.3 | 79.7 | 25  | 1012 |
| 1991 7 3 0 1 ANA      | 31.5 | 79.0 | 25  | 1011 |
| 1991 7 3 6 1 ANA      | 32.5 | 77.4 | 25  | 1010 |
| 1991 7 3 12 1 ANA     | 33.9 | 75.4 | 30  | 1008 |
| 1991 7 3 18 1 ANA     | 35.2 | 73.4 | 30  | 1006 |
| 1991 7 4 0 1 ANA      | 36.2 | 70.7 | 40  | 1003 |
| 1991 7 4 6 1 ANA      | 37.1 | 67.8 | 45  | 1002 |
| 1991 7 4 12 1 ANA     | 37.6 | 64.7 | 45  | 1001 |
| 1991 7 4 18 1 ANA     | 37.9 | 61.1 | 45  | 1000 |
| 1991 7 5 0 1 ANA      | 38.0 | 57.5 | 45  | 1001 |
| 1991 7 5 6 1 ANA      | 37.5 | 54.2 | 40  | 1003 |
| 1991 7 5 12 1 ANA     | 37.0 | 50.7 | 35  | 1005 |
| 1991 8 16 0 2 BOB     | 25.6 | 74.3 | 25  | 1014 |
| 1991 8 16 6 2 BOB     | 25.7 | 74.9 | 25  | 1012 |
| 1991 8 16 12 2 BOB    | 25.9 | 75.4 | 30  | 1010 |
| 1991 8 16 18 2 BOB    | 26.4 | 75.8 | 35  | 1005 |
| 1991 8 17 0 2 BOB     | 27.1 | 76.2 | 40  | 1003 |
| 1991 8 17 6 2 BOB     | 27.8 | 76.5 | 45  | 998  |
| 1991 8 17 12 2 BOB    | 28.4 | 76.9 | 55  | 996  |
| 1991 8 17 18 2 BOB    | 29.0 | 77.1 | 65  | 986  |
| 1991 8 18 0 2 BOB     | 29.7 | 77.0 | 70  | 980  |
| 1991 8 18 6 2 BOB     | 30.5 | 76.9 | 75  | 979  |
| 1991 8 18 12 2 BOB    | 31.5 | 76.6 | 80  | 974  |
| 1991 8 18 18 2 BOB    | 33.0 | 76.1 | 85  | 965  |
| 1991 8 19 0 2 BOB     | 34.6 | 75.3 | 95  | 957  |
| 1991 8 19 6 2 BOB     | 36.5 | 74.5 | 100 | 950  |
| 1991 8 19 12 2 BOB    | 38.9 | 73.0 | 95  | 953  |
| 1991 8 19 18 2 BOB    | 41.4 | 71.4 | 85  | 964  |
| 1991 8 20 0 2 BOB     | 43.8 | 69.6 | 60  | 977  |

|      |      |    |             |      |      |    |      |
|------|------|----|-------------|------|------|----|------|
| 1991 | 8 20 | 6  | 2 BOB       | 45.6 | 67.6 | 50 | 987  |
| 1991 | 8 20 | 12 | 2 BOB       | 47.0 | 65.5 | 45 | 998  |
| 1991 | 8 20 | 18 | 2 BOB       | 48.4 | 61.9 | 40 | 1003 |
| 1991 | 8 21 | 0  | 2 BOB       | 49.8 | 58.3 | 40 | 1008 |
| 1991 | 8 21 | 6  | 2 BOB       | 50.9 | 54.9 | 40 | 1008 |
| 1991 | 8 21 | 12 | 2 BOB       | 51.6 | 51.4 | 35 | 1009 |
| 1991 | 8 21 | 18 | 2 BOB       | 51.9 | 47.3 | 30 | 1009 |
| 1991 | 8 22 | 0  | 2 BOB       | 51.9 | 42.8 | 30 | 1004 |
| 1991 | 8 22 | 6  | 2 BOB       | 51.5 | 38.3 | 35 | 1002 |
| 1991 | 8 22 | 12 | 2 BOB       | 50.7 | 34.1 | 40 | 994  |
| 1991 | 8 22 | 18 | 2 BOB       | 49.3 | 30.3 | 40 | 992  |
| 1991 | 8 23 | 0  | 2 BOB       | 47.7 | 26.9 | 40 | 992  |
| 1991 | 8 23 | 6  | 2 BOB       | 46.3 | 23.9 | 40 | 996  |
| 1991 | 8 23 | 12 | 2 BOB       | 45.3 | 21.4 | 35 | 1000 |
| 1991 | 8 23 | 18 | 2 BOB       | 44.2 | 19.9 | 30 | 1004 |
| 1991 | 8 24 | 0  | 2 BOB       | 43.1 | 19.4 | 25 | 1006 |
| 1991 | 8 24 | 6  | 2 BOB       | 42.4 | 19.1 | 25 | 1008 |
| 1991 | 8 24 | 12 | 2 BOB       | 42.2 | 18.6 | 25 | 1009 |
| 1991 | 8 24 | 18 | 2 BOB       | 42.1 | 18.1 | 25 | 1009 |
| 1991 | 8 25 | 0  | 2 BOB       | 41.9 | 17.9 | 25 | 1009 |
| 1991 | 8 25 | 6  | 2 BOB       | 41.7 | 17.8 | 25 | 1010 |
| 1991 | 8 25 | 12 | 2 BOB       | 41.3 | 17.6 | 25 | 1010 |
| 1991 | 8 25 | 18 | 2 BOB       | 40.9 | 17.3 | 25 | 1010 |
| 1991 | 8 26 | 0  | 2 BOB       | 40.5 | 16.8 | 25 | 1010 |
| 1991 | 8 26 | 6  | 2 BOB       | 40.2 | 16.0 | 25 | 1010 |
| 1991 | 8 26 | 12 | 2 BOB       | 40.0 | 15.2 | 20 | 1012 |
| 1991 | 8 26 | 18 | 2 BOB       | 39.9 | 14.4 | 20 | 1012 |
| 1991 | 8 27 | 0  | 2 BOB       | 39.9 | 13.8 | 20 | 1014 |
| 1991 | 8 27 | 6  | 2 BOB       | 40.0 | 13.1 | 20 | 1014 |
| 1991 | 8 27 | 12 | 2 BOB       | 40.0 | 12.4 | 20 | 1014 |
| 1991 | 8 27 | 18 | 2 BOB       | 40.0 | 11.8 | 20 | 1014 |
| 1991 | 8 28 | 0  | 2 BOB       | 40.0 | 11.3 | 15 | 1015 |
| 1991 | 8 28 | 6  | 2 BOB       | 40.0 | 10.9 | 15 | 1015 |
| 1991 | 8 28 | 12 | 2 BOB       | 40.0 | 10.5 | 15 | 1014 |
| 1991 | 8 28 | 18 | 2 BOB       | 40.0 | 10.1 | 10 | 1014 |
| 1991 | 8 29 | 0  | 2 BOB       | 40.0 | 9.9  | 10 | 1015 |
| 1991 | 9 4  | 12 | 3 CLAUDETTE | 26.7 | 55.9 | 25 | 1014 |
| 1991 | 9 4  | 18 | 3 CLAUDETTE | 26.8 | 55.7 | 30 | 1012 |
| 1991 | 9 5  | 0  | 3 CLAUDETTE | 26.7 | 55.6 | 30 | 1010 |
| 1991 | 9 5  | 6  | 3 CLAUDETTE | 26.5 | 55.7 | 30 | 1008 |
| 1991 | 9 5  | 12 | 3 CLAUDETTE | 26.2 | 56.0 | 35 | 1004 |
| 1991 | 9 5  | 18 | 3 CLAUDETTE | 26.0 | 56.5 | 40 | 1000 |
| 1991 | 9 6  | 0  | 3 CLAUDETTE | 25.9 | 57.1 | 50 | 994  |
| 1991 | 9 6  | 6  | 3 CLAUDETTE | 26.0 | 57.9 | 60 | 987  |

|      |   |    |    |   |           |      |      |     |      |
|------|---|----|----|---|-----------|------|------|-----|------|
| 1991 | 9 | 6  | 12 | 3 | CLAUDETTE | 26.2 | 58.8 | 75  | 979  |
| 1991 | 9 | 6  | 18 | 3 | CLAUDETTE | 26.4 | 59.7 | 95  | 965  |
| 1991 | 9 | 7  | 0  | 3 | CLAUDETTE | 26.6 | 60.3 | 105 | 953  |
| 1991 | 9 | 7  | 6  | 3 | CLAUDETTE | 26.8 | 61.0 | 110 | 946  |
| 1991 | 9 | 7  | 12 | 3 | CLAUDETTE | 27.2 | 61.7 | 115 | 946  |
| 1991 | 9 | 7  | 18 | 3 | CLAUDETTE | 27.7 | 62.4 | 100 | 960  |
| 1991 | 9 | 8  | 0  | 3 | CLAUDETTE | 28.4 | 62.8 | 90  | 962  |
| 1991 | 9 | 8  | 6  | 3 | CLAUDETTE | 29.2 | 63.1 | 85  | 964  |
| 1991 | 9 | 8  | 12 | 3 | CLAUDETTE | 30.0 | 63.3 | 85  | 966  |
| 1991 | 9 | 8  | 18 | 3 | CLAUDETTE | 31.0 | 63.2 | 80  | 967  |
| 1991 | 9 | 9  | 0  | 3 | CLAUDETTE | 31.9 | 62.5 | 80  | 972  |
| 1991 | 9 | 9  | 6  | 3 | CLAUDETTE | 32.9 | 61.4 | 75  | 976  |
| 1991 | 9 | 9  | 12 | 3 | CLAUDETTE | 33.8 | 60.5 | 75  | 980  |
| 1991 | 9 | 9  | 18 | 3 | CLAUDETTE | 34.2 | 59.0 | 75  | 984  |
| 1991 | 9 | 10 | 0  | 3 | CLAUDETTE | 34.3 | 57.4 | 70  | 988  |
| 1991 | 9 | 10 | 6  | 3 | CLAUDETTE | 33.9 | 56.0 | 60  | 991  |
| 1991 | 9 | 10 | 12 | 3 | CLAUDETTE | 33.5 | 54.0 | 55  | 995  |
| 1991 | 9 | 10 | 18 | 3 | CLAUDETTE | 33.4 | 51.8 | 45  | 998  |
| 1991 | 9 | 11 | 0  | 3 | CLAUDETTE | 33.6 | 48.8 | 40  | 1001 |
| 1991 | 9 | 11 | 6  | 3 | CLAUDETTE | 33.9 | 46.1 | 40  | 1004 |
| 1991 | 9 | 11 | 12 | 3 | CLAUDETTE | 34.3 | 43.4 | 35  | 1006 |
| 1991 | 9 | 11 | 18 | 3 | CLAUDETTE | 34.5 | 40.5 | 30  | 1009 |
| 1991 | 9 | 12 | 0  | 3 | CLAUDETTE | 34.5 | 38.3 | 30  | 1010 |
| 1991 | 9 | 12 | 6  | 3 | CLAUDETTE | 34.2 | 36.5 | 30  | 1011 |
| 1991 | 9 | 12 | 12 | 3 | CLAUDETTE | 33.9 | 34.7 | 30  | 1012 |
| 1991 | 9 | 12 | 18 | 3 | CLAUDETTE | 34.3 | 33.1 | 30  | 1013 |
| 1991 | 9 | 13 | 0  | 3 | CLAUDETTE | 34.7 | 31.9 | 25  | 1014 |
| 1991 | 9 | 13 | 6  | 3 | CLAUDETTE | 35.2 | 30.7 | 25  | 1015 |
| 1991 | 9 | 13 | 12 | 3 | CLAUDETTE | 35.6 | 29.6 | 20  | 1016 |
| 1991 | 9 | 13 | 18 | 3 | CLAUDETTE | 36.0 | 28.4 | 20  | 1017 |
| 1991 | 9 | 14 | 0  | 3 | CLAUDETTE | 36.2 | 27.3 | 20  | 1017 |
| 1991 | 9 | 14 | 6  | 3 | CLAUDETTE | 36.3 | 26.5 | 15  | 1017 |
| 1991 | 9 | 14 | 12 | 3 | CLAUDETTE | 36.8 | 26.1 | 15  | 1018 |
| 1991 | 9 | 14 | 18 | 3 | CLAUDETTE | 37.0 | 25.9 | 15  | 1018 |
| 1991 | 9 | 7  | 0  | 4 | DANNY     | 10.4 | 25.8 | 25  | 1010 |
| 1991 | 9 | 7  | 6  | 4 | DANNY     | 10.2 | 27.5 | 25  | 1009 |
| 1991 | 9 | 7  | 12 | 4 | DANNY     | 10.0 | 29.2 | 25  | 1008 |
| 1991 | 9 | 7  | 18 | 4 | DANNY     | 9.8  | 30.6 | 30  | 1008 |
| 1991 | 9 | 8  | 0  | 4 | DANNY     | 9.7  | 32.0 | 30  | 1007 |
| 1991 | 9 | 8  | 6  | 4 | DANNY     | 9.8  | 33.4 | 30  | 1006 |
| 1991 | 9 | 8  | 12 | 4 | DANNY     | 10.3 | 35.0 | 35  | 1005 |
| 1991 | 9 | 8  | 18 | 4 | DANNY     | 10.8 | 36.5 | 40  | 1004 |
| 1991 | 9 | 9  | 0  | 4 | DANNY     | 11.3 | 37.9 | 40  | 1002 |
| 1991 | 9 | 9  | 6  | 4 | DANNY     | 11.8 | 39.6 | 45  | 1000 |

|      |    |    |    |   |        |      |      |    |      |
|------|----|----|----|---|--------|------|------|----|------|
| 1991 | 9  | 9  | 12 | 4 | DANNY  | 12.5 | 41.5 | 45 | 999  |
| 1991 | 9  | 9  | 18 | 4 | DANNY  | 13.4 | 43.4 | 45 | 999  |
| 1991 | 9  | 10 | 0  | 4 | DANNY  | 14.2 | 45.2 | 45 | 998  |
| 1991 | 9  | 10 | 6  | 4 | DANNY  | 14.9 | 47.3 | 45 | 999  |
| 1991 | 9  | 10 | 12 | 4 | DANNY  | 15.3 | 49.7 | 45 | 999  |
| 1991 | 9  | 10 | 18 | 4 | DANNY  | 15.7 | 52.1 | 40 | 1000 |
| 1991 | 9  | 11 | 0  | 4 | DANNY  | 15.8 | 54.1 | 35 | 1002 |
| 1991 | 9  | 11 | 6  | 4 | DANNY  | 15.9 | 56.1 | 35 | 1005 |
| 1991 | 9  | 11 | 12 | 4 | DANNY  | 16.0 | 58.1 | 30 | 1010 |
| 1991 | 9  | 8  | 18 | 5 | ERIKA  | 24.2 | 49.1 | 25 | 1011 |
| 1991 | 9  | 9  | 0  | 5 | ERIKA  | 25.4 | 50.0 | 25 | 1010 |
| 1991 | 9  | 9  | 6  | 5 | ERIKA  | 26.8 | 50.9 | 30 | 1009 |
| 1991 | 9  | 9  | 12 | 5 | ERIKA  | 27.8 | 52.3 | 30 | 1007 |
| 1991 | 9  | 9  | 18 | 5 | ERIKA  | 29.3 | 53.1 | 35 | 1005 |
| 1991 | 9  | 10 | 0  | 5 | ERIKA  | 31.2 | 51.7 | 40 | 1002 |
| 1991 | 9  | 10 | 6  | 5 | ERIKA  | 33.0 | 49.3 | 45 | 1000 |
| 1991 | 9  | 10 | 12 | 5 | ERIKA  | 34.7 | 46.1 | 50 | 998  |
| 1991 | 9  | 10 | 18 | 5 | ERIKA  | 35.8 | 42.5 | 50 | 997  |
| 1991 | 9  | 11 | 0  | 5 | ERIKA  | 36.5 | 38.7 | 50 | 997  |
| 1991 | 9  | 11 | 6  | 5 | ERIKA  | 36.8 | 35.0 | 50 | 998  |
| 1991 | 9  | 11 | 12 | 5 | ERIKA  | 37.0 | 31.9 | 45 | 1000 |
| 1991 | 9  | 11 | 18 | 5 | ERIKA  | 37.1 | 29.3 | 40 | 1003 |
| 1991 | 9  | 12 | 0  | 5 | ERIKA  | 37.3 | 27.2 | 35 | 1007 |
| 1991 | 9  | 12 | 6  | 5 | ERIKA  | 37.9 | 25.2 | 30 | 1009 |
| 1991 | 9  | 12 | 12 | 5 | ERIKA  | 38.8 | 23.3 | 30 | 1011 |
| 1991 | 9  | 12 | 18 | 5 | ERIKA  | 39.5 | 21.5 | 25 | 1013 |
| 1991 | 10 | 15 | 0  | 6 | FABIAN | 18.9 | 85.7 | 25 | 1010 |
| 1991 | 10 | 15 | 6  | 6 | FABIAN | 19.5 | 85.1 | 30 | 1008 |
| 1991 | 10 | 15 | 12 | 6 | FABIAN | 20.3 | 84.1 | 35 | 1007 |
| 1991 | 10 | 15 | 18 | 6 | FABIAN | 21.2 | 83.1 | 40 | 1006 |
| 1991 | 10 | 16 | 0  | 6 | FABIAN | 22.4 | 81.8 | 40 | 1004 |
| 1991 | 10 | 16 | 6  | 6 | FABIAN | 23.9 | 80.8 | 40 | 1002 |
| 1991 | 10 | 16 | 12 | 6 | FABIAN | 25.2 | 79.8 | 40 | 1007 |
| 1991 | 10 | 16 | 18 | 6 | FABIAN | 26.5 | 78.5 | 40 | 1009 |
| 1991 | 10 | 17 | 0  | 6 | FABIAN | 30.0 | 75.5 | 40 | 1009 |
| 1991 | 10 | 25 | 18 | 7 | GRACE  | 27.1 | 64.9 | 25 | 1008 |
| 1991 | 10 | 26 | 0  | 7 | GRACE  | 27.1 | 65.2 | 30 | 1007 |
| 1991 | 10 | 26 | 6  | 7 | GRACE  | 27.2 | 65.5 | 35 | 1005 |
| 1991 | 10 | 26 | 12 | 7 | GRACE  | 27.3 | 66.0 | 35 | 1002 |
| 1991 | 10 | 26 | 18 | 7 | GRACE  | 27.5 | 66.5 | 40 | 997  |
| 1991 | 10 | 27 | 0  | 7 | GRACE  | 28.1 | 67.1 | 45 | 993  |
| 1991 | 10 | 27 | 6  | 7 | GRACE  | 28.9 | 66.9 | 50 | 990  |
| 1991 | 10 | 27 | 12 | 7 | GRACE  | 29.8 | 66.4 | 55 | 988  |
| 1991 | 10 | 27 | 18 | 7 | GRACE  | 30.8 | 67.2 | 60 | 987  |

|            |      |           |             |      |      |      |      |
|------------|------|-----------|-------------|------|------|------|------|
| 1991 10 28 | 0    | 7 GRACE   | 31.6        | 68.1 | 65   | 985  |      |
| 1991 10 28 | 6    | 7 GRACE   | 32.2        | 68.5 | 65   | 983  |      |
| 1991 10 28 | 12   | 7 GRACE   | 32.3        | 68.5 | 65   | 983  |      |
| 1991 10 28 | 18   | 7 GRACE   | 32.4        | 67.8 | 65   | 982  |      |
| 1991 10 29 | 0    | 7 GRACE   | 31.8        | 66.8 | 70   | 980  |      |
| 1991 10 29 | 6    | 7 GRACE   | 31.6        | 65.3 | 75   | 981  |      |
| 1991 10 29 | 12   | 7 GRACE   | 31.5        | 63.2 | 85   | 982  |      |
| 1991 10 29 | 18   | 7 GRACE   | 32.5        | 59.0 | 75   | 0    |      |
| 1991 10 28 | 18   | 8 UNNAMED | 44.0        | 59.0 | 30   | 1006 |      |
| 1991 10 29 | 0    | 8 UNNAMED | 43.0        | 57.5 | 40   | 999  |      |
| 1991 10 29 | 6    | 8 UNNAMED | 42.5        | 55.5 | 45   | 992  |      |
| 1991 10 29 | 12   | 8 UNNAMED | 41.0        | 56.0 | 50   | 990  |      |
| 1991 10 29 | 18   | 8 UNNAMED | 39.5        | 57.5 | 50   | 986  |      |
| 1991 10 30 | 0    | 8 UNNAMED | 39.0        | 59.5 | 55   | 981  |      |
| 1991 10 30 | 6    | 8 UNNAMED | 39.0        | 61.5 | 60   | 977  |      |
| 1991 10 30 | 12   | 8 UNNAMED | 39.0        | 63.5 | 60   | 972  |      |
| 1991 10 30 | 18   | 8 UNNAMED | 39.6        | 65.8 | 60   | 978  |      |
| 1991 10 31 | 0    | 8 UNNAMED | 40.0        | 68.5 | 55   | 982  |      |
| 1991 10 31 | 6    | 8 UNNAMED | 39.0        | 71.0 | 55   | 988  |      |
| 1991 10 31 | 12   | 8 UNNAMED | 37.7        | 71.5 | 50   | 992  |      |
| 1991 10 31 | 18   | 8 UNNAMED | 36.7        | 71.5 | 40   | 996  |      |
| 1991 11    | 1    | 0         | 8 UNNAMED   | 36.0 | 70.0 | 50   | 995  |
| 1991 11    | 1    | 6         | 8 UNNAMED   | 36.2 | 68.5 | 55   | 993  |
| 1991 11    | 1    | 12        | 8 UNNAMED   | 37.0 | 67.0 | 60   | 988  |
| 1991 11    | 1    | 18        | 8 UNNAMED   | 38.2 | 66.5 | 65   | 980  |
| 1991 11    | 2    | 0         | 8 UNNAMED   | 39.5 | 65.7 | 65   | 981  |
| 1991 11    | 2    | 6         | 8 UNNAMED   | 41.6 | 64.7 | 60   | 988  |
| 1991 11    | 2    | 12        | 8 UNNAMED   | 44.0 | 63.6 | 50   | 996  |
| 1991 11    | 2    | 18        | 8 UNNAMED   | 46.3 | 62.6 | 30   | 1005 |
| 1992       | 4 21 | 12        | 1 SUBTROP 1 | 24.0 | 59.0 | 25   | 1006 |
| 1992       | 4 21 | 18        | 1 SUBTROP 1 | 24.2 | 60.0 | 25   | 1005 |
| 1992       | 4 22 | 0         | 1 SUBTROP 1 | 24.5 | 61.0 | 30   | 1003 |
| 1992       | 4 22 | 6         | 1 SUBTROP 1 | 24.9 | 61.5 | 45   | 1002 |
| 1992       | 4 22 | 12        | 1 SUBTROP 1 | 25.2 | 62.0 | 45   | 1002 |
| 1992       | 4 22 | 18        | 1 SUBTROP 1 | 25.5 | 62.4 | 45   | 1003 |
| 1992       | 4 23 | 0         | 1 SUBTROP 1 | 25.6 | 63.1 | 45   | 1004 |
| 1992       | 4 23 | 6         | 1 SUBTROP 1 | 25.6 | 63.5 | 40   | 1005 |
| 1992       | 4 23 | 12        | 1 SUBTROP 1 | 25.6 | 63.7 | 35   | 1008 |
| 1992       | 4 23 | 18        | 1 SUBTROP 1 | 25.7 | 63.5 | 30   | 1008 |
| 1992       | 4 24 | 0         | 1 SUBTROP 1 | 25.7 | 63.1 | 25   | 1009 |
| 1992       | 4 24 | 6         | 1 SUBTROP 1 | 25.7 | 62.6 | 25   | 1009 |
| 1992       | 4 24 | 12        | 1 SUBTROP 1 | 25.7 | 62.0 | 25   | 1010 |
| 1992       | 4 24 | 18        | 1 SUBTROP 1 | 25.7 | 61.1 | 25   | 1010 |
| 1992       | 8 16 | 18        | 2 ANDREW    | 10.8 | 35.5 | 25   | 1010 |

|      |      |    |   |        |      |      |     |      |
|------|------|----|---|--------|------|------|-----|------|
| 1992 | 8 17 | 0  | 2 | ANDREW | 11.2 | 37.4 | 30  | 1009 |
| 1992 | 8 17 | 6  | 2 | ANDREW | 11.7 | 39.6 | 30  | 1008 |
| 1992 | 8 17 | 12 | 2 | ANDREW | 12.3 | 42.0 | 35  | 1006 |
| 1992 | 8 17 | 18 | 2 | ANDREW | 13.1 | 44.2 | 35  | 1003 |
| 1992 | 8 18 | 0  | 2 | ANDREW | 13.6 | 46.2 | 40  | 1002 |
| 1992 | 8 18 | 6  | 2 | ANDREW | 14.1 | 48.0 | 45  | 1001 |
| 1992 | 8 18 | 12 | 2 | ANDREW | 14.6 | 49.9 | 45  | 1000 |
| 1992 | 8 18 | 18 | 2 | ANDREW | 15.4 | 51.8 | 45  | 1000 |
| 1992 | 8 19 | 0  | 2 | ANDREW | 16.3 | 53.5 | 45  | 1001 |
| 1992 | 8 19 | 6  | 2 | ANDREW | 17.2 | 55.3 | 45  | 1002 |
| 1992 | 8 19 | 12 | 2 | ANDREW | 18.0 | 56.9 | 45  | 1005 |
| 1992 | 8 19 | 18 | 2 | ANDREW | 18.8 | 58.3 | 45  | 1007 |
| 1992 | 8 20 | 0  | 2 | ANDREW | 19.8 | 59.3 | 40  | 1011 |
| 1992 | 8 20 | 6  | 2 | ANDREW | 20.7 | 60.0 | 40  | 1013 |
| 1992 | 8 20 | 12 | 2 | ANDREW | 21.7 | 60.7 | 40  | 1015 |
| 1992 | 8 20 | 18 | 2 | ANDREW | 22.5 | 61.5 | 40  | 1014 |
| 1992 | 8 21 | 0  | 2 | ANDREW | 23.2 | 62.4 | 45  | 1014 |
| 1992 | 8 21 | 6  | 2 | ANDREW | 23.9 | 63.3 | 45  | 1010 |
| 1992 | 8 21 | 12 | 2 | ANDREW | 24.4 | 64.2 | 50  | 1007 |
| 1992 | 8 21 | 18 | 2 | ANDREW | 24.8 | 64.9 | 50  | 1004 |
| 1992 | 8 22 | 0  | 2 | ANDREW | 25.3 | 65.9 | 55  | 1000 |
| 1992 | 8 22 | 6  | 2 | ANDREW | 25.6 | 67.0 | 65  | 994  |
| 1992 | 8 22 | 12 | 2 | ANDREW | 25.8 | 68.3 | 80  | 981  |
| 1992 | 8 22 | 18 | 2 | ANDREW | 25.7 | 69.7 | 95  | 969  |
| 1992 | 8 23 | 0  | 2 | ANDREW | 25.6 | 71.1 | 110 | 961  |
| 1992 | 8 23 | 6  | 2 | ANDREW | 25.5 | 72.5 | 130 | 947  |
| 1992 | 8 23 | 12 | 2 | ANDREW | 25.4 | 74.2 | 145 | 933  |
| 1992 | 8 23 | 18 | 2 | ANDREW | 25.4 | 75.8 | 150 | 922  |
| 1992 | 8 24 | 0  | 2 | ANDREW | 25.4 | 77.5 | 125 | 930  |
| 1992 | 8 24 | 6  | 2 | ANDREW | 25.4 | 79.3 | 130 | 937  |
| 1992 | 8 24 | 12 | 2 | ANDREW | 25.6 | 81.2 | 115 | 951  |
| 1992 | 8 24 | 18 | 2 | ANDREW | 25.8 | 83.1 | 115 | 947  |
| 1992 | 8 25 | 0  | 2 | ANDREW | 26.2 | 85.0 | 115 | 943  |
| 1992 | 8 25 | 6  | 2 | ANDREW | 26.6 | 86.7 | 115 | 948  |
| 1992 | 8 25 | 12 | 2 | ANDREW | 27.2 | 88.2 | 120 | 946  |
| 1992 | 8 25 | 18 | 2 | ANDREW | 27.8 | 89.6 | 125 | 941  |
| 1992 | 8 26 | 0  | 2 | ANDREW | 28.5 | 90.5 | 125 | 937  |
| 1992 | 8 26 | 6  | 2 | ANDREW | 29.2 | 91.3 | 120 | 955  |
| 1992 | 8 26 | 12 | 2 | ANDREW | 30.1 | 91.7 | 80  | 973  |
| 1992 | 8 26 | 18 | 2 | ANDREW | 30.9 | 91.6 | 50  | 991  |
| 1992 | 8 27 | 0  | 2 | ANDREW | 31.5 | 91.1 | 35  | 995  |
| 1992 | 8 27 | 6  | 2 | ANDREW | 32.1 | 90.5 | 30  | 997  |
| 1992 | 8 27 | 12 | 2 | ANDREW | 32.8 | 89.6 | 30  | 998  |
| 1992 | 8 27 | 18 | 2 | ANDREW | 33.6 | 88.4 | 25  | 999  |

|      |      |    |   |        |      |      |    |      |
|------|------|----|---|--------|------|------|----|------|
| 1992 | 8 28 | 0  | 2 | ANDREW | 34.4 | 86.7 | 20 | 1000 |
| 1992 | 8 28 | 6  | 2 | ANDREW | 35.4 | 84.0 | 20 | 1000 |
| 1992 | 9 17 | 18 | 3 | BONNIE | 33.8 | 59.0 | 30 | 1009 |
| 1992 | 9 18 | 0  | 3 | BONNIE | 33.5 | 58.3 | 30 | 1008 |
| 1992 | 9 18 | 6  | 3 | BONNIE | 33.7 | 58.0 | 35 | 1005 |
| 1992 | 9 18 | 12 | 3 | BONNIE | 34.0 | 57.9 | 45 | 1000 |
| 1992 | 9 18 | 18 | 3 | BONNIE | 34.3 | 58.1 | 65 | 988  |
| 1992 | 9 19 | 0  | 3 | BONNIE | 34.2 | 57.8 | 75 | 980  |
| 1992 | 9 19 | 6  | 3 | BONNIE | 34.4 | 57.4 | 80 | 976  |
| 1992 | 9 19 | 12 | 3 | BONNIE | 34.7 | 57.1 | 85 | 973  |
| 1992 | 9 19 | 18 | 3 | BONNIE | 35.2 | 56.8 | 90 | 970  |
| 1992 | 9 20 | 0  | 3 | BONNIE | 35.6 | 56.6 | 90 | 970  |
| 1992 | 9 20 | 6  | 3 | BONNIE | 36.1 | 56.2 | 85 | 973  |
| 1992 | 9 20 | 12 | 3 | BONNIE | 36.5 | 56.0 | 85 | 974  |
| 1992 | 9 20 | 18 | 3 | BONNIE | 36.8 | 55.5 | 85 | 973  |
| 1992 | 9 21 | 0  | 3 | BONNIE | 37.0 | 54.6 | 90 | 972  |
| 1992 | 9 21 | 6  | 3 | BONNIE | 37.2 | 53.8 | 90 | 970  |
| 1992 | 9 21 | 12 | 3 | BONNIE | 37.3 | 53.0 | 90 | 968  |
| 1992 | 9 21 | 18 | 3 | BONNIE | 37.5 | 52.3 | 95 | 965  |
| 1992 | 9 22 | 0  | 3 | BONNIE | 37.7 | 51.5 | 95 | 966  |
| 1992 | 9 22 | 6  | 3 | BONNIE | 37.7 | 51.2 | 95 | 967  |
| 1992 | 9 22 | 12 | 3 | BONNIE | 37.8 | 51.0 | 90 | 968  |
| 1992 | 9 22 | 18 | 3 | BONNIE | 37.8 | 50.9 | 90 | 969  |
| 1992 | 9 23 | 0  | 3 | BONNIE | 37.7 | 50.7 | 90 | 970  |
| 1992 | 9 23 | 6  | 3 | BONNIE | 37.6 | 50.7 | 85 | 972  |
| 1992 | 9 23 | 12 | 3 | BONNIE | 37.6 | 50.8 | 85 | 974  |
| 1992 | 9 23 | 18 | 3 | BONNIE | 37.5 | 51.0 | 80 | 977  |
| 1992 | 9 24 | 0  | 3 | BONNIE | 37.5 | 51.1 | 75 | 979  |
| 1992 | 9 24 | 6  | 3 | BONNIE | 37.5 | 51.2 | 70 | 983  |
| 1992 | 9 24 | 12 | 3 | BONNIE | 37.4 | 51.4 | 65 | 987  |
| 1992 | 9 24 | 18 | 3 | BONNIE | 37.2 | 51.5 | 60 | 995  |
| 1992 | 9 25 | 0  | 3 | BONNIE | 36.8 | 51.8 | 55 | 995  |
| 1992 | 9 25 | 6  | 3 | BONNIE | 36.3 | 51.8 | 45 | 1000 |
| 1992 | 9 25 | 12 | 3 | BONNIE | 35.7 | 51.8 | 40 | 1005 |
| 1992 | 9 25 | 18 | 3 | BONNIE | 35.1 | 51.8 | 35 | 1007 |
| 1992 | 9 26 | 0  | 3 | BONNIE | 34.6 | 51.7 | 30 | 1009 |
| 1992 | 9 26 | 6  | 3 | BONNIE | 34.1 | 51.3 | 30 | 1009 |
| 1992 | 9 26 | 12 | 3 | BONNIE | 33.8 | 50.8 | 30 | 1008 |
| 1992 | 9 26 | 18 | 3 | BONNIE | 33.3 | 49.9 | 35 | 1006 |
| 1992 | 9 27 | 0  | 3 | BONNIE | 33.2 | 48.4 | 35 | 1005 |
| 1992 | 9 27 | 6  | 3 | BONNIE | 33.1 | 46.9 | 40 | 1003 |
| 1992 | 9 27 | 12 | 3 | BONNIE | 33.0 | 45.4 | 40 | 1001 |
| 1992 | 9 27 | 18 | 3 | BONNIE | 33.0 | 44.0 | 45 | 999  |
| 1992 | 9 28 | 0  | 3 | BONNIE | 33.1 | 43.0 | 50 | 996  |



|      |      |      |           |      |      |    |      |
|------|------|------|-----------|------|------|----|------|
| 1992 | 9 28 | 6    | 3 BONNIE  | 33.4 | 42.0 | 55 | 994  |
| 1992 | 9 28 | 12   | 3 BONNIE  | 33.9 | 41.0 | 60 | 993  |
| 1992 | 9 28 | 18   | 3 BONNIE  | 34.5 | 39.8 | 60 | 992  |
| 1992 | 9 29 | 0    | 3 BONNIE  | 35.0 | 38.5 | 60 | 992  |
| 1992 | 9 29 | 6    | 3 BONNIE  | 35.2 | 37.6 | 60 | 993  |
| 1992 | 9 29 | 12   | 3 BONNIE  | 35.5 | 36.6 | 55 | 994  |
| 1992 | 9 29 | 18   | 3 BONNIE  | 36.1 | 34.8 | 55 | 995  |
| 1992 | 9 30 | 0    | 3 BONNIE  | 36.6 | 32.1 | 55 | 995  |
| 1992 | 9 30 | 6    | 3 BONNIE  | 37.3 | 29.4 | 55 | 995  |
| 1992 | 9 30 | 12   | 3 BONNIE  | 38.4 | 26.4 | 50 | 997  |
| 1992 | 9 30 | 18   | 3 BONNIE  | 39.0 | 24.2 | 40 | 1002 |
| 1992 | 10   | 1 0  | 3 BONNIE  | 39.0 | 22.8 | 40 | 1004 |
| 1992 | 10   | 1 6  | 3 BONNIE  | 39.0 | 21.6 | 35 | 1006 |
| 1992 | 10   | 1 12 | 3 BONNIE  | 38.5 | 21.2 | 30 | 1008 |
| 1992 | 10   | 1 18 | 3 BONNIE  | 38.2 | 21.5 | 25 | 1010 |
| 1992 | 10   | 2 0  | 3 BONNIE  | 38.1 | 21.8 | 25 | 1012 |
| 1992 | 10   | 2 6  | 3 BONNIE  | 37.9 | 22.2 | 25 | 1014 |
| 1992 | 10   | 2 12 | 3 BONNIE  | 37.8 | 22.7 | 20 | 1015 |
| 1992 | 10   | 2 18 | 3 BONNIE  | 38.0 | 24.0 | 20 | 1017 |
| 1992 | 9 21 | 18   | 4 CHARLEY | 30.0 | 33.0 | 25 | 1012 |
| 1992 | 9 22 | 0    | 4 CHARLEY | 30.3 | 33.6 | 30 | 1011 |
| 1992 | 9 22 | 6    | 4 CHARLEY | 30.9 | 33.8 | 30 | 1009 |
| 1992 | 9 22 | 12   | 4 CHARLEY | 31.6 | 34.0 | 35 | 1005 |
| 1992 | 9 22 | 18   | 4 CHARLEY | 32.5 | 34.0 | 45 | 1000 |
| 1992 | 9 23 | 0    | 4 CHARLEY | 33.4 | 34.2 | 55 | 995  |
| 1992 | 9 23 | 6    | 4 CHARLEY | 34.1 | 34.4 | 60 | 991  |
| 1992 | 9 23 | 12   | 4 CHARLEY | 34.7 | 34.5 | 65 | 987  |
| 1992 | 9 23 | 18   | 4 CHARLEY | 35.2 | 34.6 | 75 | 981  |
| 1992 | 9 24 | 0    | 4 CHARLEY | 35.6 | 34.6 | 85 | 975  |
| 1992 | 9 24 | 6    | 4 CHARLEY | 35.8 | 34.5 | 90 | 970  |
| 1992 | 9 24 | 12   | 4 CHARLEY | 36.0 | 34.3 | 90 | 967  |
| 1992 | 9 24 | 18   | 4 CHARLEY | 36.1 | 34.1 | 95 | 965  |
| 1992 | 9 25 | 0    | 4 CHARLEY | 36.1 | 33.8 | 95 | 967  |
| 1992 | 9 25 | 6    | 4 CHARLEY | 36.0 | 33.6 | 90 | 970  |
| 1992 | 9 25 | 12   | 4 CHARLEY | 35.9 | 33.4 | 85 | 973  |
| 1992 | 9 25 | 18   | 4 CHARLEY | 35.9 | 33.2 | 75 | 976  |
| 1992 | 9 26 | 0    | 4 CHARLEY | 35.9 | 32.8 | 70 | 979  |
| 1992 | 9 26 | 6    | 4 CHARLEY | 36.1 | 32.3 | 65 | 980  |
| 1992 | 9 26 | 12   | 4 CHARLEY | 36.3 | 31.5 | 65 | 980  |
| 1992 | 9 26 | 18   | 4 CHARLEY | 36.6 | 30.6 | 65 | 980  |
| 1992 | 9 27 | 0    | 4 CHARLEY | 37.2 | 29.4 | 60 | 980  |
| 1992 | 9 27 | 6    | 4 CHARLEY | 38.0 | 28.0 | 55 | 980  |
| 1992 | 9 27 | 12   | 4 CHARLEY | 39.0 | 26.3 | 55 | 981  |
| 1992 | 9 27 | 18   | 4 CHARLEY | 40.4 | 24.4 | 50 | 983  |

|      |      |    |    |          |      |      |      |      |     |
|------|------|----|----|----------|------|------|------|------|-----|
| 1992 | 9 28 | 0  | 4  | CHARLEY  | 42.0 | 22.3 | 45   | 985  |     |
| 1992 | 9 28 | 6  | 4  | CHARLEY  | 43.5 | 20.2 | 40   | 988  |     |
| 1992 | 9 28 | 12 | 4  | CHARLEY  | 45.2 | 18.3 | 40   | 990  |     |
| 1992 | 9 28 | 18 | 4  | CHARLEY  | 47.1 | 15.9 | 40   | 985  |     |
| 1992 | 9 29 | 0  | 4  | CHARLEY  | 49.5 | 13.5 | 45   | 980  |     |
| 1992 | 9 22 | 12 | 5  | DANIELLE | 32.5 | 74.6 | 30   | 1009 |     |
| 1992 | 9 22 | 18 | 5  | DANIELLE | 32.8 | 74.2 | 45   | 1006 |     |
| 1992 | 9 23 | 0  | 5  | DANIELLE | 33.6 | 73.8 | 45   | 1005 |     |
| 1992 | 9 23 | 6  | 5  | DANIELLE | 34.1 | 73.5 | 45   | 1005 |     |
| 1992 | 9 23 | 12 | 5  | DANIELLE | 34.3 | 73.2 | 40   | 1005 |     |
| 1992 | 9 23 | 18 | 5  | DANIELLE | 34.3 | 73.1 | 40   | 1006 |     |
| 1992 | 9 24 | 0  | 5  | DANIELLE | 34.0 | 73.0 | 40   | 1006 |     |
| 1992 | 9 24 | 6  | 5  | DANIELLE | 33.8 | 73.1 | 40   | 1005 |     |
| 1992 | 9 24 | 12 | 5  | DANIELLE | 33.9 | 73.3 | 40   | 1005 |     |
| 1992 | 9 24 | 18 | 5  | DANIELLE | 34.1 | 73.8 | 40   | 1005 |     |
| 1992 | 9 25 | 0  | 5  | DANIELLE | 34.3 | 74.3 | 45   | 1004 |     |
| 1992 | 9 25 | 6  | 5  | DANIELLE | 34.9 | 74.8 | 45   | 1004 |     |
| 1992 | 9 25 | 12 | 5  | DANIELLE | 35.9 | 75.2 | 55   | 1001 |     |
| 1992 | 9 25 | 18 | 5  | DANIELLE | 37.0 | 75.4 | 55   | 1007 |     |
| 1992 | 9 26 | 0  | 5  | DANIELLE | 38.3 | 75.6 | 40   | 1008 |     |
| 1992 | 9 26 | 6  | 5  | DANIELLE | 39.6 | 75.9 | 35   | 1010 |     |
| 1992 | 9 26 | 12 | 5  | DANIELLE | 40.5 | 76.5 | 25   | 1014 |     |
| 1992 | 9 26 | 18 | 6  | EARL     | 26.2 | 69.1 | 25   | 1009 |     |
| 1992 | 9 27 | 0  | 6  | EARL     | 25.8 | 70.8 | 25   | 1008 |     |
| 1992 | 9 27 | 6  | 6  | EARL     | 26.3 | 72.3 | 25   | 1007 |     |
| 1992 | 9 27 | 12 | 6  | EARL     | 27.0 | 73.9 | 30   | 1006 |     |
| 1992 | 9 27 | 18 | 6  | EARL     | 27.7 | 75.5 | 30   | 1003 |     |
| 1992 | 9 28 | 0  | 6  | EARL     | 28.0 | 76.6 | 30   | 1004 |     |
| 1992 | 9 28 | 6  | 6  | EARL     | 28.3 | 77.7 | 30   | 1004 |     |
| 1992 | 9 28 | 12 | 6  | EARL     | 28.6 | 78.6 | 30   | 1004 |     |
| 1992 | 9 28 | 18 | 6  | EARL     | 28.9 | 79.2 | 30   | 1004 |     |
| 1992 | 9 29 | 0  | 6  | EARL     | 29.2 | 79.4 | 30   | 1004 |     |
| 1992 | 9 29 | 6  | 6  | EARL     | 29.4 | 79.5 | 30   | 1003 |     |
| 1992 | 9 29 | 12 | 6  | EARL     | 29.7 | 79.3 | 35   | 1003 |     |
| 1992 | 9 29 | 18 | 6  | EARL     | 29.8 | 79.1 | 40   | 1003 |     |
| 1992 | 9 30 | 0  | 6  | EARL     | 29.9 | 78.8 | 40   | 1002 |     |
| 1992 | 9 30 | 6  | 6  | EARL     | 30.0 | 78.1 | 40   | 1000 |     |
| 1992 | 9 30 | 12 | 6  | EARL     | 30.1 | 77.1 | 45   | 999  |     |
| 1992 | 9 30 | 18 | 6  | EARL     | 29.9 | 75.8 | 50   | 997  |     |
| 1992 | 10   | 1  | 0  | 6        | EARL | 29.7 | 74.4 | 50   | 996 |
| 1992 | 10   | 1  | 6  | 6        | EARL | 29.3 | 73.0 | 50   | 997 |
| 1992 | 10   | 1  | 12 | 6        | EARL | 28.9 | 71.6 | 50   | 998 |
| 1992 | 10   | 1  | 18 | 6        | EARL | 28.4 | 70.3 | 55   | 996 |
| 1992 | 10   | 2  | 0  | 6        | EARL | 28.0 | 69.0 | 55   | 990 |

|                         |      |      |    |      |
|-------------------------|------|------|----|------|
| 1992 10 2 6 6 EARL      | 27.6 | 68.0 | 50 | 992  |
| 1992 10 2 12 6 EARL     | 27.5 | 67.0 | 45 | 1000 |
| 1992 10 2 18 6 EARL     | 27.4 | 66.1 | 40 | 1003 |
| 1992 10 3 0 6 EARL      | 27.5 | 65.2 | 35 | 1005 |
| 1992 10 3 6 6 EARL      | 27.8 | 64.5 | 35 | 1007 |
| 1992 10 3 12 6 EARL     | 28.2 | 63.7 | 30 | 1008 |
| 1992 10 3 18 6 EARL     | 28.4 | 62.9 | 30 | 1008 |
| 1992 10 22 12 7 FRANCES | 26.3 | 60.8 | 30 | 1009 |
| 1992 10 22 18 7 FRANCES | 26.6 | 61.2 | 40 | 1004 |
| 1992 10 23 0 7 FRANCES  | 27.1 | 61.4 | 50 | 996  |
| 1992 10 23 6 7 FRANCES  | 27.7 | 61.4 | 55 | 992  |
| 1992 10 23 12 7 FRANCES | 28.3 | 61.3 | 60 | 990  |
| 1992 10 23 18 7 FRANCES | 28.7 | 61.1 | 65 | 986  |
| 1992 10 24 0 7 FRANCES  | 29.0 | 60.6 | 65 | 978  |
| 1992 10 24 6 7 FRANCES  | 29.6 | 59.9 | 70 | 977  |
| 1992 10 24 12 7 FRANCES | 30.6 | 58.8 | 75 | 976  |
| 1992 10 24 18 7 FRANCES | 32.1 | 57.4 | 75 | 976  |
| 1992 10 25 0 7 FRANCES  | 33.8 | 56.2 | 70 | 978  |
| 1992 10 25 6 7 FRANCES  | 35.7 | 54.9 | 65 | 980  |
| 1992 10 25 12 7 FRANCES | 37.7 | 53.7 | 65 | 982  |
| 1992 10 25 18 7 FRANCES | 39.6 | 52.7 | 60 | 983  |
| 1992 10 26 0 7 FRANCES  | 41.4 | 51.7 | 60 | 985  |
| 1992 10 26 6 7 FRANCES  | 43.2 | 50.2 | 60 | 986  |
| 1992 10 26 12 7 FRANCES | 44.8 | 48.6 | 60 | 987  |
| 1992 10 26 18 7 FRANCES | 46.0 | 46.9 | 55 | 988  |
| 1992 10 27 0 7 FRANCES  | 47.0 | 44.9 | 55 | 989  |
| 1992 10 27 6 7 FRANCES  | 47.6 | 42.7 | 50 | 992  |
| 1992 10 27 12 7 FRANCES | 48.0 | 40.0 | 45 | 994  |
| 1992 10 27 18 7 FRANCES | 48.0 | 37.0 | 40 | 998  |
| 1992 10 28 0 7 FRANCES  | 48.0 | 34.0 | 40 | 1002 |
| 1992 10 28 6 7 FRANCES  | 47.5 | 31.0 | 35 | 1004 |
| 1992 10 28 12 7 FRANCES | 47.0 | 27.5 | 35 | 1002 |
| 1992 10 28 18 7 FRANCES | 46.0 | 24.0 | 35 | 999  |
| 1992 10 29 0 7 FRANCES  | 45.0 | 20.0 | 40 | 999  |
| 1992 10 29 6 7 FRANCES  | 44.0 | 16.0 | 35 | 1001 |
| 1992 10 29 12 7 FRANCES | 43.5 | 12.0 | 35 | 1002 |
| 1992 10 29 18 7 FRANCES | 43.0 | 9.0  | 30 | 1003 |
| 1992 10 30 0 7 FRANCES  | 43.0 | 7.0  | 30 | 1002 |
| 1993 6 18 0 1 ARLENE    | 20.5 | 91.9 | 25 | 1006 |
| 1993 6 18 6 1 ARLENE    | 20.8 | 92.3 | 25 | 1005 |
| 1993 6 18 12 1 ARLENE   | 21.1 | 92.8 | 25 | 1005 |
| 1993 6 18 18 1 ARLENE   | 21.7 | 93.1 | 30 | 1005 |
| 1993 6 19 0 1 ARLENE    | 22.6 | 93.4 | 30 | 1006 |
| 1993 6 19 6 1 ARLENE    | 23.8 | 94.1 | 30 | 1006 |

|      |   |    |    |   |        |      |      |    |      |
|------|---|----|----|---|--------|------|------|----|------|
| 1993 | 6 | 19 | 12 | 1 | ARLENE | 25.9 | 95.9 | 35 | 1000 |
| 1993 | 6 | 19 | 18 | 1 | ARLENE | 26.0 | 96.3 | 35 | 1000 |
| 1993 | 6 | 20 | 0  | 1 | ARLENE | 26.3 | 96.7 | 35 | 1000 |
| 1993 | 6 | 20 | 6  | 1 | ARLENE | 27.0 | 97.2 | 35 | 1001 |
| 1993 | 6 | 20 | 12 | 1 | ARLENE | 27.2 | 97.8 | 30 | 1002 |
| 1993 | 6 | 20 | 18 | 1 | ARLENE | 27.2 | 97.9 | 30 | 1003 |
| 1993 | 6 | 21 | 0  | 1 | ARLENE | 27.1 | 98.1 | 30 | 1004 |
| 1993 | 6 | 21 | 6  | 1 | ARLENE | 27.1 | 98.3 | 25 | 1006 |
| 1993 | 8 | 4  | 12 | 2 | BRET   | 10.4 | 40.3 | 30 | 1010 |
| 1993 | 8 | 4  | 18 | 2 | BRET   | 10.4 | 41.7 | 30 | 1009 |
| 1993 | 8 | 5  | 0  | 2 | BRET   | 10.4 | 43.4 | 35 | 1008 |
| 1993 | 8 | 5  | 6  | 2 | BRET   | 10.3 | 45.3 | 40 | 1007 |
| 1993 | 8 | 5  | 12 | 2 | BRET   | 10.3 | 47.3 | 45 | 1006 |
| 1993 | 8 | 5  | 18 | 2 | BRET   | 10.3 | 49.2 | 45 | 1006 |
| 1993 | 8 | 6  | 0  | 2 | BRET   | 10.2 | 51.0 | 45 | 1006 |
| 1993 | 8 | 6  | 6  | 2 | BRET   | 10.1 | 52.9 | 50 | 1005 |
| 1993 | 8 | 6  | 12 | 2 | BRET   | 10.0 | 54.9 | 50 | 1005 |
| 1993 | 8 | 6  | 18 | 2 | BRET   | 10.1 | 56.8 | 50 | 1003 |
| 1993 | 8 | 7  | 0  | 2 | BRET   | 10.4 | 58.6 | 50 | 1002 |
| 1993 | 8 | 7  | 6  | 2 | BRET   | 10.7 | 60.5 | 50 | 1002 |
| 1993 | 8 | 7  | 12 | 2 | BRET   | 10.8 | 62.4 | 50 | 1002 |
| 1993 | 8 | 7  | 18 | 2 | BRET   | 10.8 | 64.1 | 45 | 1006 |
| 1993 | 8 | 8  | 0  | 2 | BRET   | 10.8 | 65.7 | 40 | 1008 |
| 1993 | 8 | 8  | 6  | 2 | BRET   | 11.0 | 67.6 | 40 | 1007 |
| 1993 | 8 | 8  | 12 | 2 | BRET   | 11.0 | 69.7 | 40 | 1007 |
| 1993 | 8 | 8  | 18 | 2 | BRET   | 11.0 | 71.8 | 40 | 1007 |
| 1993 | 8 | 9  | 0  | 2 | BRET   | 10.9 | 73.8 | 40 | 1006 |
| 1993 | 8 | 9  | 6  | 2 | BRET   | 10.7 | 75.8 | 35 | 1005 |
| 1993 | 8 | 9  | 12 | 2 | BRET   | 10.7 | 77.8 | 30 | 1004 |
| 1993 | 8 | 9  | 18 | 2 | BRET   | 10.7 | 79.2 | 30 | 1005 |
| 1993 | 8 | 10 | 0  | 2 | BRET   | 10.8 | 80.3 | 30 | 1004 |
| 1993 | 8 | 10 | 6  | 2 | BRET   | 11.0 | 81.4 | 35 | 1003 |
| 1993 | 8 | 10 | 12 | 2 | BRET   | 11.1 | 82.6 | 40 | 1002 |
| 1993 | 8 | 10 | 18 | 2 | BRET   | 11.1 | 84.0 | 35 | 1004 |
| 1993 | 8 | 11 | 0  | 2 | BRET   | 11.4 | 85.0 | 25 | 1007 |
| 1993 | 8 | 11 | 6  | 2 | BRET   | 11.7 | 85.8 | 20 | 1009 |
| 1993 | 8 | 11 | 12 | 2 | BRET   | 12.2 | 86.8 | 20 | 1010 |
| 1993 | 8 | 14 | 12 | 3 | CINDY  | 14.1 | 59.5 | 30 | 1012 |
| 1993 | 8 | 14 | 18 | 3 | CINDY  | 14.5 | 60.9 | 35 | 1012 |
| 1993 | 8 | 15 | 0  | 3 | CINDY  | 14.9 | 62.2 | 35 | 1011 |
| 1993 | 8 | 15 | 6  | 3 | CINDY  | 15.2 | 63.5 | 35 | 1011 |
| 1993 | 8 | 15 | 12 | 3 | CINDY  | 15.4 | 64.8 | 35 | 1013 |
| 1993 | 8 | 15 | 18 | 3 | CINDY  | 15.8 | 66.0 | 35 | 1012 |
| 1993 | 8 | 16 | 0  | 3 | CINDY  | 16.4 | 66.9 | 35 | 1010 |

|      |      |    |   |        |      |      |    |      |
|------|------|----|---|--------|------|------|----|------|
| 1993 | 8 16 | 6  | 3 | CINDY  | 17.0 | 68.0 | 35 | 1008 |
| 1993 | 8 16 | 12 | 3 | CINDY  | 17.3 | 69.3 | 40 | 1007 |
| 1993 | 8 16 | 18 | 3 | CINDY  | 17.9 | 70.6 | 35 | 1008 |
| 1993 | 8 17 | 0  | 3 | CINDY  | 18.8 | 71.3 | 30 | 1010 |
| 1993 | 8 23 | 12 | 4 | DENNIS | 13.6 | 30.8 | 25 | 1010 |
| 1993 | 8 23 | 18 | 4 | DENNIS | 13.9 | 31.3 | 30 | 1009 |
| 1993 | 8 24 | 0  | 4 | DENNIS | 14.5 | 32.3 | 30 | 1007 |
| 1993 | 8 24 | 6  | 4 | DENNIS | 15.0 | 33.2 | 30 | 1005 |
| 1993 | 8 24 | 12 | 4 | DENNIS | 15.4 | 34.0 | 35 | 1003 |
| 1993 | 8 24 | 18 | 4 | DENNIS | 15.8 | 34.9 | 40 | 1002 |
| 1993 | 8 25 | 0  | 4 | DENNIS | 16.4 | 35.8 | 45 | 1000 |
| 1993 | 8 25 | 6  | 4 | DENNIS | 16.9 | 36.6 | 45 | 1000 |
| 1993 | 8 25 | 12 | 4 | DENNIS | 17.4 | 37.6 | 45 | 1000 |
| 1993 | 8 25 | 18 | 4 | DENNIS | 18.0 | 38.7 | 45 | 1000 |
| 1993 | 8 26 | 0  | 4 | DENNIS | 18.7 | 39.7 | 45 | 1000 |
| 1993 | 8 26 | 6  | 4 | DENNIS | 19.4 | 40.7 | 45 | 1000 |
| 1993 | 8 26 | 12 | 4 | DENNIS | 20.0 | 41.4 | 45 | 1000 |
| 1993 | 8 26 | 18 | 4 | DENNIS | 20.6 | 42.1 | 40 | 1001 |
| 1993 | 8 27 | 0  | 4 | DENNIS | 21.3 | 42.5 | 40 | 1002 |
| 1993 | 8 27 | 6  | 4 | DENNIS | 22.1 | 42.7 | 35 | 1005 |
| 1993 | 8 27 | 12 | 4 | DENNIS | 22.5 | 43.0 | 30 | 1006 |
| 1993 | 8 27 | 18 | 4 | DENNIS | 22.8 | 43.2 | 25 | 1009 |
| 1993 | 8 28 | 0  | 4 | DENNIS | 22.9 | 43.6 | 25 | 1009 |
| 1993 | 8 28 | 6  | 4 | DENNIS | 22.6 | 44.0 | 25 | 1009 |
| 1993 | 8 28 | 12 | 4 | DENNIS | 22.2 | 44.5 | 25 | 1010 |
| 1993 | 8 22 | 18 | 5 | EMILY  | 19.9 | 52.6 | 30 | 1020 |
| 1993 | 8 23 | 0  | 5 | EMILY  | 20.5 | 53.6 | 30 | 1020 |
| 1993 | 8 23 | 6  | 5 | EMILY  | 21.3 | 54.8 | 30 | 1020 |
| 1993 | 8 23 | 12 | 5 | EMILY  | 22.3 | 56.0 | 30 | 1020 |
| 1993 | 8 23 | 18 | 5 | EMILY  | 23.2 | 57.1 | 30 | 1020 |
| 1993 | 8 24 | 0  | 5 | EMILY  | 24.3 | 57.8 | 30 | 1020 |
| 1993 | 8 24 | 6  | 5 | EMILY  | 25.4 | 58.6 | 30 | 1020 |
| 1993 | 8 24 | 12 | 5 | EMILY  | 26.7 | 59.5 | 30 | 1020 |
| 1993 | 8 24 | 18 | 5 | EMILY  | 27.6 | 60.0 | 30 | 1019 |
| 1993 | 8 25 | 0  | 5 | EMILY  | 28.0 | 60.3 | 30 | 1018 |
| 1993 | 8 25 | 6  | 5 | EMILY  | 27.9 | 60.5 | 30 | 1017 |
| 1993 | 8 25 | 12 | 5 | EMILY  | 28.0 | 60.4 | 35 | 1016 |
| 1993 | 8 25 | 18 | 5 | EMILY  | 28.2 | 60.4 | 40 | 1015 |
| 1993 | 8 26 | 0  | 5 | EMILY  | 28.3 | 60.7 | 45 | 1013 |
| 1993 | 8 26 | 6  | 5 | EMILY  | 27.9 | 61.0 | 55 | 1010 |
| 1993 | 8 26 | 12 | 5 | EMILY  | 27.4 | 61.2 | 60 | 1007 |
| 1993 | 8 26 | 18 | 5 | EMILY  | 26.9 | 61.7 | 65 | 1004 |
| 1993 | 8 27 | 0  | 5 | EMILY  | 26.6 | 62.4 | 60 | 1000 |
| 1993 | 8 27 | 6  | 5 | EMILY  | 26.4 | 63.0 | 60 | 997  |

|      |         |         |      |      |     |      |
|------|---------|---------|------|------|-----|------|
| 1993 | 8 27 12 | 5 EMILY | 26.3 | 63.5 | 60  | 992  |
| 1993 | 8 27 18 | 5 EMILY | 26.4 | 64.4 | 65  | 982  |
| 1993 | 8 28 0  | 5 EMILY | 26.6 | 65.2 | 75  | 981  |
| 1993 | 8 28 6  | 5 EMILY | 27.0 | 66.1 | 75  | 982  |
| 1993 | 8 28 12 | 5 EMILY | 27.4 | 66.9 | 75  | 981  |
| 1993 | 8 28 18 | 5 EMILY | 28.0 | 67.6 | 75  | 976  |
| 1993 | 8 29 0  | 5 EMILY | 28.6 | 68.2 | 70  | 973  |
| 1993 | 8 29 6  | 5 EMILY | 29.3 | 68.8 | 70  | 978  |
| 1993 | 8 29 12 | 5 EMILY | 30.0 | 69.2 | 70  | 979  |
| 1993 | 8 29 18 | 5 EMILY | 30.6 | 69.7 | 70  | 978  |
| 1993 | 8 30 0  | 5 EMILY | 31.2 | 70.2 | 70  | 977  |
| 1993 | 8 30 6  | 5 EMILY | 31.5 | 70.8 | 70  | 976  |
| 1993 | 8 30 12 | 5 EMILY | 31.8 | 71.4 | 75  | 975  |
| 1993 | 8 30 18 | 5 EMILY | 32.0 | 72.2 | 75  | 974  |
| 1993 | 8 31 0  | 5 EMILY | 32.4 | 73.0 | 80  | 972  |
| 1993 | 8 31 6  | 5 EMILY | 32.9 | 73.8 | 85  | 970  |
| 1993 | 8 31 12 | 5 EMILY | 33.6 | 74.7 | 95  | 965  |
| 1993 | 8 31 18 | 5 EMILY | 34.5 | 75.2 | 100 | 962  |
| 1993 | 9 1 0   | 5 EMILY | 35.6 | 74.9 | 100 | 960  |
| 1993 | 9 1 6   | 5 EMILY | 36.6 | 74.4 | 100 | 962  |
| 1993 | 9 1 12  | 5 EMILY | 37.5 | 72.7 | 95  | 965  |
| 1993 | 9 1 18  | 5 EMILY | 38.2 | 70.7 | 90  | 969  |
| 1993 | 9 2 0   | 5 EMILY | 39.0 | 68.5 | 90  | 971  |
| 1993 | 9 2 6   | 5 EMILY | 39.2 | 66.0 | 90  | 972  |
| 1993 | 9 2 12  | 5 EMILY | 39.2 | 63.6 | 90  | 973  |
| 1993 | 9 2 18  | 5 EMILY | 39.0 | 61.4 | 85  | 974  |
| 1993 | 9 3 0   | 5 EMILY | 38.6 | 59.6 | 80  | 975  |
| 1993 | 9 3 6   | 5 EMILY | 38.1 | 58.3 | 75  | 979  |
| 1993 | 9 3 12  | 5 EMILY | 37.5 | 57.7 | 70  | 985  |
| 1993 | 9 3 18  | 5 EMILY | 36.9 | 57.5 | 60  | 994  |
| 1993 | 9 4 0   | 5 EMILY | 36.4 | 57.6 | 50  | 999  |
| 1993 | 9 4 6   | 5 EMILY | 36.0 | 57.6 | 40  | 1002 |
| 1993 | 9 4 12  | 5 EMILY | 35.8 | 57.5 | 35  | 1001 |
| 1993 | 9 4 18  | 5 EMILY | 36.1 | 57.2 | 30  | 1006 |
| 1993 | 9 5 0   | 5 EMILY | 36.7 | 56.9 | 30  | 1008 |
| 1993 | 9 5 6   | 5 EMILY | 37.4 | 56.4 | 30  | 1009 |
| 1993 | 9 5 12  | 5 EMILY | 38.0 | 55.7 | 25  | 1010 |
| 1993 | 9 5 18  | 5 EMILY | 38.7 | 54.8 | 25  | 1011 |
| 1993 | 9 6 0   | 5 EMILY | 39.0 | 53.0 | 25  | 1012 |
| 1993 | 9 6 6   | 5 EMILY | 39.3 | 51.1 | 25  | 1013 |
| 1993 | 9 6 12  | 5 EMILY | 39.8 | 49.4 | 25  | 1014 |
| 1993 | 9 7 12  | 6 FLOYD | 24.7 | 67.5 | 25  | 1012 |
| 1993 | 9 7 18  | 6 FLOYD | 26.2 | 68.2 | 40  | 1010 |
| 1993 | 9 8 0   | 6 FLOYD | 27.8 | 68.9 | 45  | 1009 |

|      |   |    |    |   |       |      |      |    |      |
|------|---|----|----|---|-------|------|------|----|------|
| 1993 | 9 | 8  | 6  | 6 | FLOYD | 29.4 | 69.4 | 45 | 1011 |
| 1993 | 9 | 8  | 12 | 6 | FLOYD | 31.0 | 69.8 | 40 | 1012 |
| 1993 | 9 | 8  | 18 | 6 | FLOYD | 33.2 | 69.2 | 40 | 1011 |
| 1993 | 9 | 9  | 0  | 6 | FLOYD | 35.3 | 67.8 | 40 | 1009 |
| 1993 | 9 | 9  | 6  | 6 | FLOYD | 37.5 | 65.7 | 40 | 1007 |
| 1993 | 9 | 9  | 12 | 6 | FLOYD | 39.3 | 62.4 | 50 | 997  |
| 1993 | 9 | 9  | 18 | 6 | FLOYD | 41.7 | 58.3 | 65 | 990  |
| 1993 | 9 | 10 | 0  | 6 | FLOYD | 43.8 | 53.9 | 65 | 990  |
| 1993 | 9 | 10 | 6  | 6 | FLOYD | 45.4 | 48.3 | 65 | 990  |
| 1993 | 9 | 10 | 12 | 6 | FLOYD | 46.5 | 42.5 | 65 | 990  |
| 1993 | 9 | 10 | 18 | 6 | FLOYD | 47.3 | 37.8 | 65 | 990  |
| 1993 | 9 | 11 | 0  | 6 | FLOYD | 47.5 | 32.5 | 65 | 989  |
| 1993 | 9 | 11 | 6  | 6 | FLOYD | 47.5 | 27.0 | 65 | 988  |
| 1993 | 9 | 11 | 12 | 6 | FLOYD | 47.5 | 22.5 | 65 | 987  |
| 1993 | 9 | 11 | 18 | 6 | FLOYD | 47.5 | 18.5 | 65 | 986  |
| 1993 | 9 | 12 | 0  | 6 | FLOYD | 47.5 | 14.5 | 65 | 983  |
| 1993 | 9 | 12 | 6  | 6 | FLOYD | 47.5 | 10.5 | 65 | 980  |
| 1993 | 9 | 12 | 12 | 6 | FLOYD | 48.0 | 7.5  | 70 | 972  |
| 1993 | 9 | 12 | 18 | 6 | FLOYD | 48.0 | 6.0  | 70 | 966  |
| 1993 | 9 | 13 | 0  | 6 | FLOYD | 48.0 | 5.0  | 70 | 966  |
| 1993 | 9 | 14 | 18 | 7 | GERT  | 10.6 | 80.7 | 25 | 1008 |
| 1993 | 9 | 15 | 0  | 7 | GERT  | 10.7 | 81.3 | 30 | 1005 |
| 1993 | 9 | 15 | 6  | 7 | GERT  | 11.0 | 82.2 | 30 | 1001 |
| 1993 | 9 | 15 | 12 | 7 | GERT  | 11.3 | 83.0 | 35 | 1001 |
| 1993 | 9 | 15 | 18 | 7 | GERT  | 11.8 | 83.8 | 35 | 1005 |
| 1993 | 9 | 16 | 0  | 7 | GERT  | 12.1 | 84.3 | 30 | 1006 |
| 1993 | 9 | 16 | 6  | 7 | GERT  | 12.5 | 84.9 | 30 | 1006 |
| 1993 | 9 | 16 | 12 | 7 | GERT  | 12.9 | 85.4 | 30 | 1006 |
| 1993 | 9 | 16 | 18 | 7 | GERT  | 13.3 | 85.8 | 25 | 1006 |
| 1993 | 9 | 17 | 0  | 7 | GERT  | 13.8 | 86.3 | 25 | 1006 |
| 1993 | 9 | 17 | 6  | 7 | GERT  | 14.5 | 86.8 | 25 | 1006 |
| 1993 | 9 | 17 | 12 | 7 | GERT  | 15.4 | 87.3 | 25 | 1006 |
| 1993 | 9 | 17 | 18 | 7 | GERT  | 16.3 | 87.8 | 35 | 1001 |
| 1993 | 9 | 18 | 0  | 7 | GERT  | 17.3 | 88.1 | 35 | 1000 |
| 1993 | 9 | 18 | 6  | 7 | GERT  | 18.2 | 88.6 | 35 | 1002 |
| 1993 | 9 | 18 | 12 | 7 | GERT  | 18.7 | 89.3 | 30 | 1003 |
| 1993 | 9 | 18 | 18 | 7 | GERT  | 19.2 | 90.5 | 30 | 1003 |
| 1993 | 9 | 19 | 0  | 7 | GERT  | 19.6 | 91.6 | 30 | 1001 |
| 1993 | 9 | 19 | 6  | 7 | GERT  | 20.0 | 92.5 | 35 | 1000 |
| 1993 | 9 | 19 | 12 | 7 | GERT  | 20.5 | 93.2 | 40 | 993  |
| 1993 | 9 | 19 | 18 | 7 | GERT  | 20.7 | 93.9 | 45 | 992  |
| 1993 | 9 | 20 | 0  | 7 | GERT  | 20.9 | 94.2 | 55 | 990  |
| 1993 | 9 | 20 | 6  | 7 | GERT  | 21.1 | 95.0 | 65 | 982  |
| 1993 | 9 | 20 | 12 | 7 | GERT  | 21.2 | 95.9 | 80 | 978  |

|      |         |           |      |       |    |      |
|------|---------|-----------|------|-------|----|------|
| 1993 | 9 20 18 | 7 GERT    | 21.3 | 97.0  | 85 | 970  |
| 1993 | 9 21 0  | 7 GERT    | 21.1 | 98.3  | 65 | 984  |
| 1993 | 9 21 6  | 7 GERT    | 20.9 | 100.2 | 40 | 1000 |
| 1993 | 9 21 12 | 7 GERT    | 20.8 | 102.5 | 25 | 1002 |
| 1993 | 9 21 18 | 7 GERT    | 20.8 | 104.7 | 20 | 1004 |
| 1993 | 9 18 18 | 8 HARVEY  | 26.7 | 61.8  | 30 | 1014 |
| 1993 | 9 19 0  | 8 HARVEY  | 27.3 | 62.0  | 30 | 1013 |
| 1993 | 9 19 6  | 8 HARVEY  | 27.9 | 62.0  | 30 | 1012 |
| 1993 | 9 19 12 | 8 HARVEY  | 28.5 | 61.7  | 30 | 1010 |
| 1993 | 9 19 18 | 8 HARVEY  | 29.3 | 61.1  | 30 | 1009 |
| 1993 | 9 20 0  | 8 HARVEY  | 30.2 | 60.2  | 30 | 1008 |
| 1993 | 9 20 6  | 8 HARVEY  | 31.5 | 59.0  | 35 | 1005 |
| 1993 | 9 20 12 | 8 HARVEY  | 33.3 | 57.4  | 50 | 998  |
| 1993 | 9 20 18 | 8 HARVEY  | 35.6 | 55.2  | 65 | 990  |
| 1993 | 9 21 0  | 8 HARVEY  | 37.8 | 52.5  | 60 | 992  |
| 1993 | 9 21 6  | 8 HARVEY  | 39.8 | 49.4  | 55 | 994  |
| 1993 | 9 21 12 | 8 HARVEY  | 42.5 | 46.5  | 50 | 997  |
| 1993 | 9 21 18 | 8 HARVEY  | 46.0 | 42.0  | 50 | 999  |
| 1994 | 6 30 6  | 1 ALBERTO | 21.7 | 83.6  | 25 | 1011 |
| 1994 | 6 30 12 | 1 ALBERTO | 21.6 | 84.3  | 25 | 1010 |
| 1994 | 6 30 18 | 1 ALBERTO | 21.6 | 85.2  | 30 | 1008 |
| 1994 | 7 1 0   | 1 ALBERTO | 21.5 | 85.6  | 30 | 1008 |
| 1994 | 7 1 6   | 1 ALBERTO | 22.0 | 86.1  | 30 | 1008 |
| 1994 | 7 1 12  | 1 ALBERTO | 22.5 | 86.4  | 30 | 1008 |
| 1994 | 7 1 18  | 1 ALBERTO | 23.0 | 86.7  | 30 | 1007 |
| 1994 | 7 2 0   | 1 ALBERTO | 23.7 | 87.1  | 35 | 1006 |
| 1994 | 7 2 6   | 1 ALBERTO | 24.4 | 87.5  | 35 | 1005 |
| 1994 | 7 2 12  | 1 ALBERTO | 25.5 | 87.5  | 40 | 1003 |
| 1994 | 7 2 18  | 1 ALBERTO | 26.5 | 86.9  | 45 | 1000 |
| 1994 | 7 3 0   | 1 ALBERTO | 27.7 | 86.8  | 45 | 998  |
| 1994 | 7 3 6   | 1 ALBERTO | 28.8 | 86.8  | 50 | 997  |
| 1994 | 7 3 12  | 1 ALBERTO | 29.9 | 86.7  | 55 | 993  |
| 1994 | 7 3 18  | 1 ALBERTO | 30.7 | 86.3  | 45 | 1000 |
| 1994 | 7 4 0   | 1 ALBERTO | 31.2 | 86.1  | 25 | 1004 |
| 1994 | 7 4 6   | 1 ALBERTO | 31.7 | 85.9  | 20 | 1009 |
| 1994 | 7 4 12  | 1 ALBERTO | 32.3 | 85.5  | 20 | 1011 |
| 1994 | 7 4 18  | 1 ALBERTO | 32.7 | 85.2  | 20 | 1014 |
| 1994 | 7 5 0   | 1 ALBERTO | 33.0 | 85.0  | 20 | 1014 |
| 1994 | 7 5 6   | 1 ALBERTO | 33.2 | 84.9  | 20 | 1013 |
| 1994 | 7 5 12  | 1 ALBERTO | 33.3 | 84.8  | 20 | 1013 |
| 1994 | 7 5 18  | 1 ALBERTO | 33.5 | 84.6  | 20 | 1012 |
| 1994 | 7 6 0   | 1 ALBERTO | 33.4 | 84.4  | 15 | 1013 |
| 1994 | 7 6 6   | 1 ALBERTO | 33.3 | 84.5  | 15 | 1013 |
| 1994 | 7 6 12  | 1 ALBERTO | 33.1 | 84.8  | 15 | 1013 |



|      |   |    |    |   |         |      |      |    |      |
|------|---|----|----|---|---------|------|------|----|------|
| 1994 | 7 | 6  | 18 | 1 | ALBERTO | 32.8 | 85.4 | 15 | 1013 |
| 1994 | 7 | 7  | 0  | 1 | ALBERTO | 32.7 | 86.3 | 10 | 1012 |
| 1994 | 7 | 7  | 6  | 1 | ALBERTO | 32.7 | 86.6 | 10 | 1012 |
| 1994 | 7 | 7  | 12 | 1 | ALBERTO | 32.8 | 86.8 | 10 | 1012 |
| 1994 | 7 | 7  | 18 | 1 | ALBERTO | 33.0 | 87.0 | 10 | 1013 |
| 1994 | 8 | 14 | 12 | 2 | BERYL   | 28.7 | 87.2 | 20 | 1013 |
| 1994 | 8 | 14 | 18 | 2 | BERYL   | 29.4 | 87.3 | 25 | 1012 |
| 1994 | 8 | 15 | 0  | 2 | BERYL   | 29.5 | 86.3 | 25 | 1009 |
| 1994 | 8 | 15 | 6  | 2 | BERYL   | 29.6 | 85.9 | 30 | 1008 |
| 1994 | 8 | 15 | 12 | 2 | BERYL   | 29.7 | 85.6 | 35 | 1007 |
| 1994 | 8 | 15 | 18 | 2 | BERYL   | 29.9 | 85.7 | 45 | 1004 |
| 1994 | 8 | 16 | 0  | 2 | BERYL   | 30.0 | 85.6 | 50 | 1000 |
| 1994 | 8 | 16 | 6  | 2 | BERYL   | 30.4 | 85.3 | 50 | 1003 |
| 1994 | 8 | 16 | 12 | 2 | BERYL   | 31.3 | 85.0 | 30 | 1004 |
| 1994 | 8 | 16 | 18 | 2 | BERYL   | 32.3 | 84.5 | 25 | 1005 |
| 1994 | 8 | 17 | 0  | 2 | BERYL   | 33.3 | 83.9 | 20 | 1005 |
| 1994 | 8 | 17 | 6  | 2 | BERYL   | 34.3 | 83.5 | 15 | 1006 |
| 1994 | 8 | 17 | 12 | 2 | BERYL   | 35.5 | 82.6 | 15 | 1009 |
| 1994 | 8 | 17 | 18 | 2 | BERYL   | 37.5 | 81.5 | 15 | 1011 |
| 1994 | 8 | 18 | 0  | 2 | BERYL   | 38.5 | 79.6 | 15 | 1011 |
| 1994 | 8 | 18 | 6  | 2 | BERYL   | 39.5 | 77.5 | 15 | 1011 |
| 1994 | 8 | 18 | 12 | 2 | BERYL   | 41.2 | 76.0 | 15 | 1010 |
| 1994 | 8 | 18 | 18 | 2 | BERYL   | 41.6 | 73.9 | 15 | 1010 |
| 1994 | 8 | 19 | 0  | 2 | BERYL   | 42.0 | 72.0 | 15 | 1012 |
| 1994 | 8 | 16 | 12 | 3 | CHRIS   | 11.3 | 39.4 | 30 | 1010 |
| 1994 | 8 | 16 | 18 | 3 | CHRIS   | 11.5 | 40.3 | 30 | 1008 |
| 1994 | 8 | 17 | 0  | 3 | CHRIS   | 11.7 | 41.2 | 35 | 1006 |
| 1994 | 8 | 17 | 6  | 3 | CHRIS   | 12.1 | 42.2 | 40 | 1003 |
| 1994 | 8 | 17 | 12 | 3 | CHRIS   | 12.6 | 43.3 | 50 | 1000 |
| 1994 | 8 | 17 | 18 | 3 | CHRIS   | 13.3 | 44.5 | 60 | 994  |
| 1994 | 8 | 18 | 0  | 3 | CHRIS   | 13.9 | 45.6 | 60 | 988  |
| 1994 | 8 | 18 | 6  | 3 | CHRIS   | 14.5 | 46.8 | 65 | 987  |
| 1994 | 8 | 18 | 12 | 3 | CHRIS   | 15.2 | 48.0 | 65 | 987  |
| 1994 | 8 | 18 | 18 | 3 | CHRIS   | 16.0 | 49.3 | 65 | 987  |
| 1994 | 8 | 19 | 0  | 3 | CHRIS   | 17.0 | 50.6 | 70 | 985  |
| 1994 | 8 | 19 | 6  | 3 | CHRIS   | 18.0 | 51.9 | 70 | 979  |
| 1994 | 8 | 19 | 12 | 3 | CHRIS   | 19.0 | 53.2 | 70 | 979  |
| 1994 | 8 | 19 | 18 | 3 | CHRIS   | 20.1 | 54.4 | 70 | 980  |
| 1994 | 8 | 20 | 0  | 3 | CHRIS   | 21.3 | 55.6 | 65 | 984  |
| 1994 | 8 | 20 | 6  | 3 | CHRIS   | 22.6 | 56.8 | 60 | 995  |
| 1994 | 8 | 20 | 12 | 3 | CHRIS   | 23.8 | 58.2 | 50 | 1009 |
| 1994 | 8 | 20 | 18 | 3 | CHRIS   | 24.9 | 59.7 | 45 | 1010 |
| 1994 | 8 | 21 | 0  | 3 | CHRIS   | 26.1 | 61.0 | 40 | 1011 |
| 1994 | 8 | 21 | 6  | 3 | CHRIS   | 27.3 | 62.3 | 35 | 1012 |

|      |    |    |    |   |          |      |      |    |      |
|------|----|----|----|---|----------|------|------|----|------|
| 1994 | 8  | 21 | 12 | 3 | CHRIS    | 28.7 | 63.1 | 35 | 1013 |
| 1994 | 8  | 21 | 18 | 3 | CHRIS    | 30.4 | 63.1 | 35 | 1013 |
| 1994 | 8  | 22 | 0  | 3 | CHRIS    | 32.2 | 62.8 | 35 | 1012 |
| 1994 | 8  | 22 | 6  | 3 | CHRIS    | 33.8 | 62.8 | 35 | 1008 |
| 1994 | 8  | 22 | 12 | 3 | CHRIS    | 35.0 | 63.0 | 35 | 1006 |
| 1994 | 8  | 22 | 18 | 3 | CHRIS    | 36.2 | 62.3 | 40 | 1004 |
| 1994 | 8  | 23 | 0  | 3 | CHRIS    | 37.9 | 60.7 | 40 | 1003 |
| 1994 | 8  | 23 | 6  | 3 | CHRIS    | 39.9 | 58.4 | 40 | 1003 |
| 1994 | 8  | 23 | 12 | 3 | CHRIS    | 42.2 | 55.5 | 45 | 1003 |
| 1994 | 8  | 23 | 18 | 3 | CHRIS    | 44.7 | 52.0 | 45 | 1003 |
| 1994 | 9  | 9  | 12 | 4 | DEBBY    | 13.1 | 56.8 | 25 | 1011 |
| 1994 | 9  | 9  | 18 | 4 | DEBBY    | 13.4 | 58.3 | 30 | 1010 |
| 1994 | 9  | 10 | 0  | 4 | DEBBY    | 13.7 | 60.2 | 45 | 1010 |
| 1994 | 9  | 10 | 6  | 4 | DEBBY    | 14.1 | 61.6 | 60 | 1006 |
| 1994 | 9  | 10 | 12 | 4 | DEBBY    | 14.6 | 63.2 | 55 | 1007 |
| 1994 | 9  | 10 | 18 | 4 | DEBBY    | 15.1 | 64.9 | 50 | 1008 |
| 1994 | 9  | 11 | 0  | 4 | DEBBY    | 15.5 | 66.7 | 50 | 1008 |
| 1994 | 9  | 21 | 18 | 5 | ERNESTO  | 10.1 | 29.9 | 25 | 1010 |
| 1994 | 9  | 22 | 0  | 5 | ERNESTO  | 10.5 | 30.2 | 25 | 1010 |
| 1994 | 9  | 22 | 6  | 5 | ERNESTO  | 11.1 | 30.3 | 30 | 1009 |
| 1994 | 9  | 22 | 12 | 5 | ERNESTO  | 11.8 | 30.3 | 35 | 1005 |
| 1994 | 9  | 22 | 18 | 5 | ERNESTO  | 12.5 | 30.3 | 45 | 1000 |
| 1994 | 9  | 23 | 0  | 5 | ERNESTO  | 13.1 | 30.4 | 50 | 997  |
| 1994 | 9  | 23 | 6  | 5 | ERNESTO  | 13.8 | 30.5 | 50 | 998  |
| 1994 | 9  | 23 | 12 | 5 | ERNESTO  | 14.4 | 30.6 | 45 | 1000 |
| 1994 | 9  | 23 | 18 | 5 | ERNESTO  | 14.9 | 30.6 | 45 | 1001 |
| 1994 | 9  | 24 | 0  | 5 | ERNESTO  | 15.4 | 30.6 | 40 | 1003 |
| 1994 | 9  | 24 | 6  | 5 | ERNESTO  | 15.9 | 30.7 | 35 | 1005 |
| 1994 | 9  | 24 | 12 | 5 | ERNESTO  | 16.5 | 31.0 | 30 | 1007 |
| 1994 | 9  | 24 | 18 | 5 | ERNESTO  | 16.8 | 31.3 | 30 | 1009 |
| 1994 | 9  | 25 | 0  | 5 | ERNESTO  | 17.0 | 31.6 | 25 | 1010 |
| 1994 | 9  | 25 | 6  | 5 | ERNESTO  | 17.0 | 31.9 | 25 | 1010 |
| 1994 | 9  | 25 | 12 | 5 | ERNESTO  | 17.0 | 32.1 | 25 | 1010 |
| 1994 | 9  | 25 | 18 | 5 | ERNESTO  | 17.0 | 32.3 | 25 | 1010 |
| 1994 | 9  | 26 | 0  | 5 | ERNESTO  | 16.8 | 33.2 | 20 | 1011 |
| 1994 | 11 | 2  | 0  | 6 | FLORENCE | 22.7 | 47.0 | 30 | 1011 |
| 1994 | 11 | 2  | 6  | 6 | FLORENCE | 23.2 | 47.7 | 35 | 1010 |
| 1994 | 11 | 2  | 12 | 6 | FLORENCE | 23.8 | 48.2 | 35 | 1009 |
| 1994 | 11 | 2  | 18 | 6 | FLORENCE | 24.2 | 48.9 | 35 | 1008 |
| 1994 | 11 | 3  | 0  | 6 | FLORENCE | 24.5 | 49.9 | 35 | 1008 |
| 1994 | 11 | 3  | 6  | 6 | FLORENCE | 24.7 | 50.7 | 30 | 1008 |
| 1994 | 11 | 3  | 12 | 6 | FLORENCE | 25.0 | 51.4 | 30 | 1006 |
| 1994 | 11 | 3  | 18 | 6 | FLORENCE | 25.3 | 52.2 | 30 | 1005 |
| 1994 | 11 | 4  | 0  | 6 | FLORENCE | 26.0 | 52.6 | 35 | 1004 |

|         |    |    |            |      |      |    |      |
|---------|----|----|------------|------|------|----|------|
| 1994 11 | 4  | 6  | 6 FLORENCE | 26.7 | 52.9 | 40 | 1003 |
| 1994 11 | 4  | 12 | 6 FLORENCE | 27.3 | 53.4 | 50 | 999  |
| 1994 11 | 4  | 18 | 6 FLORENCE | 28.1 | 54.0 | 65 | 990  |
| 1994 11 | 5  | 0  | 6 FLORENCE | 28.8 | 54.6 | 65 | 987  |
| 1994 11 | 5  | 6  | 6 FLORENCE | 29.4 | 55.1 | 65 | 986  |
| 1994 11 | 5  | 12 | 6 FLORENCE | 30.0 | 55.7 | 70 | 984  |
| 1994 11 | 5  | 18 | 6 FLORENCE | 30.6 | 56.2 | 75 | 981  |
| 1994 11 | 6  | 0  | 6 FLORENCE | 31.3 | 56.7 | 75 | 980  |
| 1994 11 | 6  | 6  | 6 FLORENCE | 32.0 | 56.9 | 75 | 980  |
| 1994 11 | 6  | 12 | 6 FLORENCE | 32.6 | 57.0 | 75 | 980  |
| 1994 11 | 6  | 18 | 6 FLORENCE | 33.0 | 56.9 | 65 | 982  |
| 1994 11 | 7  | 0  | 6 FLORENCE | 33.3 | 56.5 | 65 | 982  |
| 1994 11 | 7  | 6  | 6 FLORENCE | 33.7 | 56.0 | 70 | 981  |
| 1994 11 | 7  | 12 | 6 FLORENCE | 34.4 | 54.8 | 80 | 975  |
| 1994 11 | 7  | 18 | 6 FLORENCE | 35.4 | 53.1 | 90 | 972  |
| 1994 11 | 8  | 0  | 6 FLORENCE | 37.0 | 49.9 | 95 | 972  |
| 1994 11 | 8  | 6  | 6 FLORENCE | 39.2 | 45.5 | 95 | 974  |
| 1994 11 | 8  | 12 | 6 FLORENCE | 41.8 | 40.7 | 85 | 977  |
| 1994 11 | 8  | 18 | 6 FLORENCE | 44.2 | 36.2 | 75 | 982  |
| 1994 11 | 8  | 12 | 7 GORDON   | 11.9 | 82.3 | 25 | 1009 |
| 1994 11 | 8  | 18 | 7 GORDON   | 12.0 | 82.5 | 25 | 1008 |
| 1994 11 | 9  | 0  | 7 GORDON   | 12.3 | 82.8 | 30 | 1007 |
| 1994 11 | 9  | 6  | 7 GORDON   | 12.5 | 83.0 | 30 | 1007 |
| 1994 11 | 9  | 12 | 7 GORDON   | 12.8 | 83.2 | 30 | 1007 |
| 1994 11 | 9  | 18 | 7 GORDON   | 13.2 | 83.4 | 30 | 1007 |
| 1994 11 | 10 | 0  | 7 GORDON   | 13.6 | 83.4 | 30 | 1007 |
| 1994 11 | 10 | 6  | 7 GORDON   | 14.0 | 83.4 | 30 | 1008 |
| 1994 11 | 10 | 12 | 7 GORDON   | 14.3 | 83.2 | 30 | 1008 |
| 1994 11 | 10 | 18 | 7 GORDON   | 14.6 | 82.7 | 35 | 1006 |
| 1994 11 | 11 | 0  | 7 GORDON   | 15.1 | 82.4 | 35 | 1006 |
| 1994 11 | 11 | 6  | 7 GORDON   | 15.7 | 82.3 | 35 | 1003 |
| 1994 11 | 11 | 12 | 7 GORDON   | 16.3 | 82.2 | 35 | 1005 |
| 1994 11 | 11 | 18 | 7 GORDON   | 16.9 | 81.5 | 35 | 1004 |
| 1994 11 | 12 | 0  | 7 GORDON   | 17.2 | 80.8 | 40 | 1000 |
| 1994 11 | 12 | 6  | 7 GORDON   | 17.4 | 80.2 | 40 | 999  |
| 1994 11 | 12 | 12 | 7 GORDON   | 17.5 | 79.8 | 40 | 999  |
| 1994 11 | 12 | 18 | 7 GORDON   | 17.4 | 79.2 | 35 | 999  |
| 1994 11 | 13 | 0  | 7 GORDON   | 17.6 | 77.9 | 35 | 999  |
| 1994 11 | 13 | 6  | 7 GORDON   | 18.3 | 76.0 | 40 | 1001 |
| 1994 11 | 13 | 12 | 7 GORDON   | 19.9 | 75.0 | 40 | 1000 |
| 1994 11 | 13 | 18 | 7 GORDON   | 21.5 | 75.4 | 40 | 1001 |
| 1994 11 | 14 | 0  | 7 GORDON   | 22.1 | 76.3 | 40 | 999  |
| 1994 11 | 14 | 6  | 7 GORDON   | 22.7 | 77.5 | 45 | 998  |
| 1994 11 | 14 | 12 | 7 GORDON   | 23.2 | 78.3 | 45 | 997  |

|               |   |         |      |      |    |      |
|---------------|---|---------|------|------|----|------|
| 1994 11 14 18 | 7 | GORDON  | 23.4 | 79.1 | 45 | 998  |
| 1994 11 15 0  | 7 | GORDON  | 23.6 | 79.9 | 45 | 998  |
| 1994 11 15 6  | 7 | GORDON  | 23.9 | 80.8 | 45 | 999  |
| 1994 11 15 12 | 7 | GORDON  | 24.5 | 81.6 | 45 | 999  |
| 1994 11 15 18 | 7 | GORDON  | 24.9 | 82.1 | 45 | 998  |
| 1994 11 16 0  | 7 | GORDON  | 25.4 | 82.5 | 45 | 998  |
| 1994 11 16 6  | 7 | GORDON  | 25.7 | 82.4 | 45 | 997  |
| 1994 11 16 12 | 7 | GORDON  | 26.4 | 82.0 | 45 | 995  |
| 1994 11 16 18 | 7 | GORDON  | 27.1 | 81.4 | 45 | 995  |
| 1994 11 17 0  | 7 | GORDON  | 28.0 | 80.0 | 55 | 993  |
| 1994 11 17 6  | 7 | GORDON  | 29.0 | 78.5 | 55 | 989  |
| 1994 11 17 12 | 7 | GORDON  | 30.0 | 76.7 | 60 | 987  |
| 1994 11 17 18 | 7 | GORDON  | 31.5 | 74.8 | 65 | 981  |
| 1994 11 18 0  | 7 | GORDON  | 33.1 | 74.2 | 75 | 980  |
| 1994 11 18 6  | 7 | GORDON  | 33.5 | 74.7 | 70 | 981  |
| 1994 11 18 12 | 7 | GORDON  | 33.7 | 75.7 | 70 | 984  |
| 1994 11 18 18 | 7 | GORDON  | 33.2 | 75.9 | 60 | 986  |
| 1994 11 19 0  | 7 | GORDON  | 32.5 | 75.5 | 50 | 992  |
| 1994 11 19 6  | 7 | GORDON  | 31.6 | 75.0 | 45 | 996  |
| 1994 11 19 12 | 7 | GORDON  | 31.1 | 74.8 | 40 | 1000 |
| 1994 11 19 18 | 7 | GORDON  | 30.4 | 75.0 | 35 | 1005 |
| 1994 11 20 0  | 7 | GORDON  | 29.8 | 75.3 | 35 | 1007 |
| 1994 11 20 6  | 7 | GORDON  | 28.9 | 76.2 | 30 | 1008 |
| 1994 11 20 12 | 7 | GORDON  | 28.4 | 77.2 | 30 | 1009 |
| 1994 11 20 18 | 7 | GORDON  | 28.2 | 78.6 | 25 | 1009 |
| 1994 11 21 0  | 7 | GORDON  | 28.2 | 79.8 | 25 | 1010 |
| 1994 11 21 6  | 7 | GORDON  | 29.2 | 81.5 | 20 | 1012 |
| 1994 11 21 12 | 7 | GORDON  | 31.3 | 81.8 | 20 | 1013 |
| 1994 11 21 18 | 7 | GORDON  | 34.1 | 79.8 | 20 | 1013 |
| 1995 6 3 0    | 1 | ALLISON | 17.4 | 84.3 | 30 | 1005 |
| 1995 6 3 6    | 1 | ALLISON | 18.3 | 84.9 | 30 | 1004 |
| 1995 6 3 12   | 1 | ALLISON | 19.3 | 85.7 | 35 | 1003 |
| 1995 6 3 18   | 1 | ALLISON | 20.6 | 85.8 | 40 | 1001 |
| 1995 6 4 0    | 1 | ALLISON | 22.0 | 86.0 | 50 | 997  |
| 1995 6 4 6    | 1 | ALLISON | 23.3 | 86.3 | 60 | 995  |
| 1995 6 4 12   | 1 | ALLISON | 24.7 | 86.2 | 65 | 987  |
| 1995 6 4 18   | 1 | ALLISON | 26.2 | 86.2 | 65 | 988  |
| 1995 6 5 0    | 1 | ALLISON | 27.6 | 86.1 | 65 | 988  |
| 1995 6 5 6    | 1 | ALLISON | 28.5 | 85.6 | 60 | 990  |
| 1995 6 5 12   | 1 | ALLISON | 29.6 | 84.7 | 60 | 990  |
| 1995 6 5 18   | 1 | ALLISON | 30.7 | 83.8 | 45 | 993  |
| 1995 6 6 0    | 1 | ALLISON | 31.8 | 82.8 | 30 | 993  |
| 1995 6 6 6    | 1 | ALLISON | 32.7 | 81.5 | 35 | 994  |
| 1995 6 6 12   | 1 | ALLISON | 33.6 | 80.0 | 35 | 995  |

|      |   |    |    |   |         |      |      |    |      |
|------|---|----|----|---|---------|------|------|----|------|
| 1995 | 6 | 6  | 18 | 1 | ALLISON | 34.5 | 78.1 | 40 | 995  |
| 1995 | 6 | 7  | 0  | 1 | ALLISON | 35.6 | 75.9 | 40 | 992  |
| 1995 | 6 | 7  | 6  | 1 | ALLISON | 37.1 | 73.6 | 45 | 990  |
| 1995 | 6 | 7  | 12 | 1 | ALLISON | 38.5 | 71.0 | 45 | 988  |
| 1995 | 6 | 7  | 18 | 1 | ALLISON | 39.8 | 69.2 | 45 | 984  |
| 1995 | 6 | 8  | 0  | 1 | ALLISON | 41.0 | 67.7 | 50 | 982  |
| 1995 | 6 | 8  | 6  | 1 | ALLISON | 42.4 | 66.0 | 50 | 984  |
| 1995 | 6 | 8  | 12 | 1 | ALLISON | 43.8 | 63.7 | 50 | 989  |
| 1995 | 6 | 8  | 18 | 1 | ALLISON | 45.2 | 61.2 | 45 | 993  |
| 1995 | 6 | 9  | 0  | 1 | ALLISON | 46.5 | 58.5 | 40 | 995  |
| 1995 | 6 | 9  | 6  | 1 | ALLISON | 48.1 | 55.9 | 40 | 996  |
| 1995 | 6 | 9  | 12 | 1 | ALLISON | 50.0 | 53.0 | 40 | 997  |
| 1995 | 6 | 9  | 18 | 1 | ALLISON | 53.0 | 52.0 | 40 | 1000 |
| 1995 | 6 | 10 | 0  | 1 | ALLISON | 57.0 | 52.0 | 40 | 997  |
| 1995 | 6 | 10 | 6  | 1 | ALLISON | 60.0 | 52.0 | 40 | 990  |
| 1995 | 6 | 10 | 12 | 1 | ALLISON | 62.0 | 53.0 | 40 | 992  |
| 1995 | 6 | 10 | 18 | 1 | ALLISON | 64.0 | 55.0 | 35 | 992  |
| 1995 | 6 | 11 | 0  | 1 | ALLISON | 65.0 | 56.0 | 35 | 993  |
| 1995 | 7 | 5  | 6  | 2 | BARRY   | 32.0 | 72.0 | 20 | 1019 |
| 1995 | 7 | 5  | 12 | 2 | BARRY   | 32.0 | 72.0 | 20 | 1019 |
| 1995 | 7 | 5  | 18 | 2 | BARRY   | 31.9 | 72.0 | 20 | 1018 |
| 1995 | 7 | 6  | 0  | 2 | BARRY   | 31.8 | 72.0 | 25 | 1017 |
| 1995 | 7 | 6  | 6  | 2 | BARRY   | 31.7 | 71.9 | 25 | 1016 |
| 1995 | 7 | 6  | 12 | 2 | BARRY   | 31.5 | 71.7 | 30 | 1013 |
| 1995 | 7 | 6  | 18 | 2 | BARRY   | 31.3 | 71.6 | 30 | 1011 |
| 1995 | 7 | 7  | 0  | 2 | BARRY   | 31.3 | 71.3 | 30 | 1009 |
| 1995 | 7 | 7  | 6  | 2 | BARRY   | 31.6 | 71.0 | 35 | 1007 |
| 1995 | 7 | 7  | 12 | 2 | BARRY   | 32.2 | 70.6 | 40 | 1004 |
| 1995 | 7 | 7  | 18 | 2 | BARRY   | 33.2 | 70.2 | 60 | 1001 |
| 1995 | 7 | 8  | 0  | 2 | BARRY   | 34.0 | 69.6 | 60 | 997  |
| 1995 | 7 | 8  | 6  | 2 | BARRY   | 34.9 | 68.9 | 55 | 997  |
| 1995 | 7 | 8  | 12 | 2 | BARRY   | 35.9 | 68.2 | 50 | 997  |
| 1995 | 7 | 8  | 18 | 2 | BARRY   | 37.2 | 67.2 | 50 | 997  |
| 1995 | 7 | 9  | 0  | 2 | BARRY   | 38.7 | 66.0 | 50 | 996  |
| 1995 | 7 | 9  | 6  | 2 | BARRY   | 40.5 | 64.6 | 50 | 995  |
| 1995 | 7 | 9  | 12 | 2 | BARRY   | 42.3 | 63.1 | 50 | 993  |
| 1995 | 7 | 9  | 18 | 2 | BARRY   | 44.3 | 61.7 | 50 | 991  |
| 1995 | 7 | 10 | 0  | 2 | BARRY   | 46.4 | 60.5 | 45 | 990  |
| 1995 | 7 | 10 | 6  | 2 | BARRY   | 48.5 | 59.2 | 40 | 989  |
| 1995 | 7 | 12 | 0  | 3 | CHANTAL | 17.1 | 54.9 | 25 | 1012 |
| 1995 | 7 | 12 | 6  | 3 | CHANTAL | 17.5 | 56.5 | 25 | 1012 |
| 1995 | 7 | 12 | 12 | 3 | CHANTAL | 18.1 | 58.3 | 25 | 1012 |
| 1995 | 7 | 12 | 18 | 3 | CHANTAL | 18.7 | 59.9 | 30 | 1011 |
| 1995 | 7 | 13 | 0  | 3 | CHANTAL | 19.2 | 61.0 | 30 | 1011 |

|      |      |    |   |         |      |      |    |      |
|------|------|----|---|---------|------|------|----|------|
| 1995 | 7 13 | 6  | 3 | CHANTAL | 19.6 | 61.9 | 30 | 1011 |
| 1995 | 7 13 | 12 | 3 | CHANTAL | 20.1 | 62.7 | 30 | 1010 |
| 1995 | 7 13 | 18 | 3 | CHANTAL | 20.6 | 63.6 | 30 | 1010 |
| 1995 | 7 14 | 0  | 3 | CHANTAL | 21.1 | 64.4 | 35 | 1006 |
| 1995 | 7 14 | 6  | 3 | CHANTAL | 21.1 | 64.9 | 35 | 1008 |
| 1995 | 7 14 | 12 | 3 | CHANTAL | 21.1 | 65.2 | 35 | 1009 |
| 1995 | 7 14 | 18 | 3 | CHANTAL | 21.3 | 65.5 | 40 | 1010 |
| 1995 | 7 15 | 0  | 3 | CHANTAL | 21.8 | 66.0 | 40 | 1009 |
| 1995 | 7 15 | 6  | 3 | CHANTAL | 22.3 | 66.7 | 45 | 1006 |
| 1995 | 7 15 | 12 | 3 | CHANTAL | 22.7 | 67.5 | 45 | 1006 |
| 1995 | 7 15 | 18 | 3 | CHANTAL | 23.2 | 67.9 | 45 | 1005 |
| 1995 | 7 16 | 0  | 3 | CHANTAL | 23.7 | 68.2 | 45 | 1004 |
| 1995 | 7 16 | 6  | 3 | CHANTAL | 24.5 | 68.4 | 50 | 999  |
| 1995 | 7 16 | 12 | 3 | CHANTAL | 25.3 | 68.8 | 50 | 999  |
| 1995 | 7 16 | 18 | 3 | CHANTAL | 26.2 | 69.1 | 55 | 997  |
| 1995 | 7 17 | 0  | 3 | CHANTAL | 27.2 | 69.4 | 60 | 991  |
| 1995 | 7 17 | 6  | 3 | CHANTAL | 28.2 | 69.6 | 60 | 995  |
| 1995 | 7 17 | 12 | 3 | CHANTAL | 29.3 | 69.8 | 60 | 997  |
| 1995 | 7 17 | 18 | 3 | CHANTAL | 30.5 | 69.8 | 55 | 995  |
| 1995 | 7 18 | 0  | 3 | CHANTAL | 31.6 | 69.7 | 55 | 994  |
| 1995 | 7 18 | 6  | 3 | CHANTAL | 32.6 | 69.0 | 55 | 994  |
| 1995 | 7 18 | 12 | 3 | CHANTAL | 33.6 | 68.1 | 50 | 995  |
| 1995 | 7 18 | 18 | 3 | CHANTAL | 34.6 | 67.3 | 50 | 996  |
| 1995 | 7 19 | 0  | 3 | CHANTAL | 35.4 | 65.8 | 50 | 997  |
| 1995 | 7 19 | 6  | 3 | CHANTAL | 36.2 | 64.1 | 50 | 997  |
| 1995 | 7 19 | 12 | 3 | CHANTAL | 37.1 | 62.4 | 50 | 998  |
| 1995 | 7 19 | 18 | 3 | CHANTAL | 38.2 | 60.2 | 50 | 998  |
| 1995 | 7 20 | 0  | 3 | CHANTAL | 39.5 | 57.6 | 50 | 999  |
| 1995 | 7 20 | 6  | 3 | CHANTAL | 41.1 | 54.7 | 50 | 999  |
| 1995 | 7 20 | 12 | 3 | CHANTAL | 43.0 | 51.7 | 50 | 1000 |
| 1995 | 7 20 | 18 | 3 | CHANTAL | 45.4 | 48.8 | 50 | 1000 |
| 1995 | 7 21 | 0  | 3 | CHANTAL | 47.7 | 45.2 | 50 | 1001 |
| 1995 | 7 21 | 6  | 3 | CHANTAL | 49.7 | 41.6 | 50 | 1002 |
| 1995 | 7 21 | 12 | 3 | CHANTAL | 51.4 | 37.0 | 50 | 1003 |
| 1995 | 7 21 | 18 | 3 | CHANTAL | 53.0 | 31.0 | 50 | 1005 |
| 1995 | 7 22 | 0  | 3 | CHANTAL | 55.0 | 20.0 | 50 | 1005 |
| 1995 | 7 28 | 18 | 4 | DEAN    | 26.2 | 86.6 | 25 | 1009 |
| 1995 | 7 29 | 0  | 4 | DEAN    | 26.1 | 87.3 | 30 | 1008 |
| 1995 | 7 29 | 6  | 4 | DEAN    | 26.2 | 87.9 | 30 | 1008 |
| 1995 | 7 29 | 12 | 4 | DEAN    | 26.3 | 88.3 | 30 | 1008 |
| 1995 | 7 29 | 18 | 4 | DEAN    | 26.5 | 89.4 | 30 | 1007 |
| 1995 | 7 30 | 0  | 4 | DEAN    | 26.9 | 90.6 | 30 | 1007 |
| 1995 | 7 30 | 6  | 4 | DEAN    | 27.6 | 91.7 | 30 | 1006 |
| 1995 | 7 30 | 12 | 4 | DEAN    | 28.1 | 93.0 | 30 | 1005 |

|      |   |    |    |   |       |      |      |    |      |
|------|---|----|----|---|-------|------|------|----|------|
| 1995 | 7 | 30 | 18 | 4 | DEAN  | 28.6 | 94.0 | 35 | 1003 |
| 1995 | 7 | 31 | 0  | 4 | DEAN  | 29.0 | 95.0 | 40 | 999  |
| 1995 | 7 | 31 | 6  | 4 | DEAN  | 29.5 | 95.5 | 30 | 1002 |
| 1995 | 7 | 31 | 12 | 4 | DEAN  | 30.0 | 96.0 | 25 | 1003 |
| 1995 | 7 | 31 | 18 | 4 | DEAN  | 30.5 | 96.5 | 20 | 1003 |
| 1995 | 8 | 1  | 0  | 4 | DEAN  | 31.5 | 97.0 | 20 | 1004 |
| 1995 | 8 | 1  | 6  | 4 | DEAN  | 32.0 | 97.5 | 20 | 1004 |
| 1995 | 8 | 1  | 12 | 4 | DEAN  | 33.0 | 98.5 | 20 | 1004 |
| 1995 | 8 | 1  | 18 | 4 | DEAN  | 33.0 | 98.5 | 20 | 1004 |
| 1995 | 8 | 2  | 0  | 4 | DEAN  | 33.0 | 98.5 | 20 | 1004 |
| 1995 | 8 | 2  | 6  | 4 | DEAN  | 33.0 | 98.5 | 20 | 1004 |
| 1995 | 8 | 2  | 12 | 4 | DEAN  | 33.0 | 98.5 | 20 | 1004 |
| 1995 | 8 | 2  | 18 | 4 | DEAN  | 33.0 | 98.5 | 20 | 1004 |
| 1995 | 7 | 31 | 0  | 5 | ERIN  | 22.3 | 73.2 | 45 | 1004 |
| 1995 | 7 | 31 | 6  | 5 | ERIN  | 22.6 | 73.6 | 50 | 1003 |
| 1995 | 7 | 31 | 12 | 5 | ERIN  | 22.8 | 73.9 | 55 | 999  |
| 1995 | 7 | 31 | 18 | 5 | ERIN  | 23.2 | 74.3 | 60 | 997  |
| 1995 | 8 | 1  | 0  | 5 | ERIN  | 23.6 | 74.9 | 70 | 992  |
| 1995 | 8 | 1  | 6  | 5 | ERIN  | 24.3 | 75.7 | 75 | 988  |
| 1995 | 8 | 1  | 12 | 5 | ERIN  | 25.5 | 76.3 | 75 | 985  |
| 1995 | 8 | 1  | 18 | 5 | ERIN  | 26.3 | 77.7 | 75 | 980  |
| 1995 | 8 | 2  | 0  | 5 | ERIN  | 26.9 | 79.0 | 75 | 982  |
| 1995 | 8 | 2  | 6  | 5 | ERIN  | 27.7 | 80.4 | 75 | 985  |
| 1995 | 8 | 2  | 12 | 5 | ERIN  | 28.2 | 81.9 | 50 | 990  |
| 1995 | 8 | 2  | 18 | 5 | ERIN  | 28.6 | 83.4 | 60 | 988  |
| 1995 | 8 | 3  | 0  | 5 | ERIN  | 28.8 | 84.7 | 65 | 985  |
| 1995 | 8 | 3  | 6  | 5 | ERIN  | 29.3 | 85.7 | 70 | 979  |
| 1995 | 8 | 3  | 12 | 5 | ERIN  | 29.8 | 86.6 | 80 | 974  |
| 1995 | 8 | 3  | 18 | 5 | ERIN  | 30.6 | 87.5 | 65 | 985  |
| 1995 | 8 | 4  | 0  | 5 | ERIN  | 31.4 | 88.5 | 45 | 997  |
| 1995 | 8 | 4  | 6  | 5 | ERIN  | 32.3 | 89.1 | 35 | 1001 |
| 1995 | 8 | 4  | 12 | 5 | ERIN  | 33.2 | 89.7 | 20 | 1003 |
| 1995 | 8 | 4  | 18 | 5 | ERIN  | 34.1 | 90.2 | 20 | 1003 |
| 1995 | 8 | 5  | 0  | 5 | ERIN  | 34.8 | 90.2 | 20 | 1003 |
| 1995 | 8 | 5  | 6  | 5 | ERIN  | 35.4 | 90.1 | 20 | 1003 |
| 1995 | 8 | 5  | 12 | 5 | ERIN  | 36.3 | 89.8 | 20 | 1003 |
| 1995 | 8 | 5  | 18 | 5 | ERIN  | 37.5 | 88.8 | 20 | 1003 |
| 1995 | 8 | 6  | 0  | 5 | ERIN  | 38.4 | 86.8 | 20 | 1003 |
| 1995 | 8 | 6  | 6  | 5 | ERIN  | 38.7 | 84.9 | 20 | 1005 |
| 1995 | 8 | 6  | 12 | 5 | ERIN  | 38.8 | 82.0 | 20 | 1008 |
| 1995 | 8 | 8  | 0  | 6 | FELIX | 14.3 | 30.8 | 30 | 1010 |
| 1995 | 8 | 8  | 6  | 6 | FELIX | 14.7 | 32.5 | 30 | 1008 |
| 1995 | 8 | 8  | 12 | 6 | FELIX | 15.0 | 34.4 | 30 | 1007 |
| 1995 | 8 | 8  | 18 | 6 | FELIX | 15.5 | 36.4 | 35 | 1005 |

|      |   |    |    |   |       |      |      |     |      |
|------|---|----|----|---|-------|------|------|-----|------|
| 1995 | 8 | 9  | 0  | 6 | FELIX | 15.7 | 38.3 | 40  | 1004 |
| 1995 | 8 | 9  | 6  | 6 | FELIX | 16.0 | 40.2 | 45  | 1003 |
| 1995 | 8 | 9  | 12 | 6 | FELIX | 16.2 | 41.9 | 45  | 1001 |
| 1995 | 8 | 9  | 18 | 6 | FELIX | 16.6 | 43.7 | 45  | 1000 |
| 1995 | 8 | 10 | 0  | 6 | FELIX | 17.0 | 45.6 | 50  | 998  |
| 1995 | 8 | 10 | 6  | 6 | FELIX | 17.5 | 47.4 | 55  | 995  |
| 1995 | 8 | 10 | 12 | 6 | FELIX | 18.0 | 49.1 | 60  | 993  |
| 1995 | 8 | 10 | 18 | 6 | FELIX | 18.4 | 50.8 | 60  | 991  |
| 1995 | 8 | 11 | 0  | 6 | FELIX | 18.9 | 52.4 | 65  | 987  |
| 1995 | 8 | 11 | 6  | 6 | FELIX | 19.6 | 53.9 | 70  | 980  |
| 1995 | 8 | 11 | 12 | 6 | FELIX | 20.4 | 55.4 | 80  | 972  |
| 1995 | 8 | 11 | 18 | 6 | FELIX | 21.3 | 56.5 | 90  | 965  |
| 1995 | 8 | 12 | 0  | 6 | FELIX | 22.1 | 57.8 | 100 | 955  |
| 1995 | 8 | 12 | 6  | 6 | FELIX | 22.9 | 59.0 | 110 | 943  |
| 1995 | 8 | 12 | 12 | 6 | FELIX | 23.6 | 60.2 | 115 | 932  |
| 1995 | 8 | 12 | 18 | 6 | FELIX | 24.3 | 61.0 | 120 | 929  |
| 1995 | 8 | 13 | 0  | 6 | FELIX | 25.1 | 61.6 | 115 | 930  |
| 1995 | 8 | 13 | 6  | 6 | FELIX | 25.9 | 61.9 | 105 | 937  |
| 1995 | 8 | 13 | 12 | 6 | FELIX | 26.6 | 62.3 | 100 | 942  |
| 1995 | 8 | 13 | 18 | 6 | FELIX | 27.4 | 62.3 | 95  | 947  |
| 1995 | 8 | 14 | 0  | 6 | FELIX | 28.2 | 62.5 | 90  | 948  |
| 1995 | 8 | 14 | 6  | 6 | FELIX | 29.0 | 62.9 | 80  | 954  |
| 1995 | 8 | 14 | 12 | 6 | FELIX | 29.9 | 63.4 | 80  | 962  |
| 1995 | 8 | 14 | 18 | 6 | FELIX | 30.7 | 64.1 | 75  | 962  |
| 1995 | 8 | 15 | 0  | 6 | FELIX | 31.3 | 65.1 | 75  | 962  |
| 1995 | 8 | 15 | 6  | 6 | FELIX | 31.9 | 66.2 | 75  | 964  |
| 1995 | 8 | 15 | 12 | 6 | FELIX | 32.5 | 67.4 | 70  | 968  |
| 1995 | 8 | 15 | 18 | 6 | FELIX | 33.1 | 68.8 | 70  | 965  |
| 1995 | 8 | 16 | 0  | 6 | FELIX | 33.5 | 70.1 | 70  | 963  |
| 1995 | 8 | 16 | 6  | 6 | FELIX | 34.0 | 71.3 | 70  | 966  |
| 1995 | 8 | 16 | 12 | 6 | FELIX | 34.6 | 72.4 | 70  | 968  |
| 1995 | 8 | 16 | 18 | 6 | FELIX | 34.8 | 72.7 | 70  | 970  |
| 1995 | 8 | 17 | 0  | 6 | FELIX | 35.3 | 72.9 | 65  | 968  |
| 1995 | 8 | 17 | 6  | 6 | FELIX | 35.6 | 72.9 | 65  | 971  |
| 1995 | 8 | 17 | 12 | 6 | FELIX | 36.1 | 72.7 | 65  | 972  |
| 1995 | 8 | 17 | 18 | 6 | FELIX | 36.5 | 72.2 | 65  | 973  |
| 1995 | 8 | 18 | 0  | 6 | FELIX | 36.8 | 71.5 | 65  | 973  |
| 1995 | 8 | 18 | 6  | 6 | FELIX | 37.1 | 70.7 | 65  | 971  |
| 1995 | 8 | 18 | 12 | 6 | FELIX | 37.1 | 69.9 | 65  | 970  |
| 1995 | 8 | 18 | 18 | 6 | FELIX | 36.9 | 68.9 | 70  | 971  |
| 1995 | 8 | 19 | 0  | 6 | FELIX | 36.6 | 68.1 | 70  | 970  |
| 1995 | 8 | 19 | 6  | 6 | FELIX | 36.1 | 67.8 | 70  | 970  |
| 1995 | 8 | 19 | 12 | 6 | FELIX | 35.7 | 67.5 | 70  | 971  |
| 1995 | 8 | 19 | 18 | 6 | FELIX | 35.4 | 67.4 | 70  | 973  |



|      |      |    |             |      |      |    |      |
|------|------|----|-------------|------|------|----|------|
| 1995 | 8 20 | 0  | 6 FELIX     | 35.1 | 67.5 | 65 | 976  |
| 1995 | 8 20 | 6  | 6 FELIX     | 35.0 | 67.9 | 60 | 979  |
| 1995 | 8 20 | 12 | 6 FELIX     | 35.4 | 68.2 | 60 | 982  |
| 1995 | 8 20 | 18 | 6 FELIX     | 35.9 | 68.3 | 60 | 985  |
| 1995 | 8 21 | 0  | 6 FELIX     | 36.6 | 67.8 | 60 | 986  |
| 1995 | 8 21 | 6  | 6 FELIX     | 37.7 | 67.0 | 55 | 988  |
| 1995 | 8 21 | 12 | 6 FELIX     | 39.0 | 66.1 | 50 | 989  |
| 1995 | 8 21 | 18 | 6 FELIX     | 40.6 | 63.3 | 50 | 988  |
| 1995 | 8 22 | 0  | 6 FELIX     | 42.5 | 59.8 | 50 | 987  |
| 1995 | 8 22 | 6  | 6 FELIX     | 44.5 | 55.8 | 50 | 986  |
| 1995 | 8 22 | 12 | 6 FELIX     | 46.8 | 50.8 | 50 | 985  |
| 1995 | 8 22 | 18 | 6 FELIX     | 49.0 | 46.0 | 50 | 985  |
| 1995 | 8 23 | 0  | 6 FELIX     | 50.8 | 40.5 | 50 | 985  |
| 1995 | 8 23 | 6  | 6 FELIX     | 53.5 | 35.5 | 50 | 985  |
| 1995 | 8 23 | 12 | 6 FELIX     | 56.0 | 34.0 | 50 | 986  |
| 1995 | 8 23 | 18 | 6 FELIX     | 58.0 | 31.0 | 50 | 987  |
| 1995 | 8 24 | 0  | 6 FELIX     | 59.5 | 26.0 | 50 | 988  |
| 1995 | 8 24 | 6  | 6 FELIX     | 60.0 | 20.0 | 45 | 988  |
| 1995 | 8 24 | 12 | 6 FELIX     | 60.0 | 14.0 | 40 | 989  |
| 1995 | 8 24 | 18 | 6 FELIX     | 60.0 | 7.5  | 35 | 990  |
| 1995 | 8 25 | 0  | 6 FELIX     | 61.5 | 1.0  | 35 | 992  |
| 1995 | 8 9  | 18 | 7 GABRIELLE | 23.7 | 94.8 | 30 | 1007 |
| 1995 | 8 10 | 0  | 7 GABRIELLE | 23.7 | 95.4 | 30 | 1004 |
| 1995 | 8 10 | 6  | 7 GABRIELLE | 23.7 | 96.2 | 30 | 1002 |
| 1995 | 8 10 | 12 | 7 GABRIELLE | 23.5 | 96.5 | 35 | 999  |
| 1995 | 8 10 | 18 | 7 GABRIELLE | 23.1 | 96.7 | 40 | 997  |
| 1995 | 8 11 | 0  | 7 GABRIELLE | 23.0 | 96.7 | 45 | 995  |
| 1995 | 8 11 | 6  | 7 GABRIELLE | 23.1 | 97.0 | 50 | 993  |
| 1995 | 8 11 | 12 | 7 GABRIELLE | 23.3 | 97.2 | 55 | 991  |
| 1995 | 8 11 | 18 | 7 GABRIELLE | 23.6 | 97.5 | 60 | 990  |
| 1995 | 8 12 | 0  | 7 GABRIELLE | 23.9 | 98.2 | 30 | 999  |
| 1995 | 8 22 | 0  | 8 HUMBERTO  | 13.2 | 33.0 | 30 | 1009 |
| 1995 | 8 22 | 6  | 8 HUMBERTO  | 13.7 | 34.3 | 35 | 1005 |
| 1995 | 8 22 | 12 | 8 HUMBERTO  | 14.2 | 35.2 | 45 | 1002 |
| 1995 | 8 22 | 18 | 8 HUMBERTO  | 14.6 | 36.2 | 50 | 998  |
| 1995 | 8 23 | 0  | 8 HUMBERTO  | 14.8 | 37.3 | 60 | 995  |
| 1995 | 8 23 | 6  | 8 HUMBERTO  | 14.9 | 38.3 | 65 | 987  |
| 1995 | 8 23 | 12 | 8 HUMBERTO  | 15.0 | 39.2 | 70 | 985  |
| 1995 | 8 23 | 18 | 8 HUMBERTO  | 15.1 | 40.3 | 75 | 982  |
| 1995 | 8 24 | 0  | 8 HUMBERTO  | 15.2 | 41.0 | 80 | 975  |
| 1995 | 8 24 | 6  | 8 HUMBERTO  | 15.3 | 41.9 | 85 | 973  |
| 1995 | 8 24 | 12 | 8 HUMBERTO  | 15.4 | 42.6 | 90 | 971  |
| 1995 | 8 24 | 18 | 8 HUMBERTO  | 15.7 | 43.2 | 95 | 968  |
| 1995 | 8 25 | 0  | 8 HUMBERTO  | 16.1 | 43.8 | 90 | 970  |

|      |      |    |            |      |      |    |      |
|------|------|----|------------|------|------|----|------|
| 1995 | 8 25 | 6  | 8 HUMBERTO | 16.7 | 44.4 | 90 | 970  |
| 1995 | 8 25 | 12 | 8 HUMBERTO | 17.6 | 45.1 | 90 | 970  |
| 1995 | 8 25 | 18 | 8 HUMBERTO | 18.5 | 45.9 | 90 | 970  |
| 1995 | 8 26 | 0  | 8 HUMBERTO | 19.4 | 46.6 | 90 | 970  |
| 1995 | 8 26 | 6  | 8 HUMBERTO | 20.0 | 47.2 | 90 | 970  |
| 1995 | 8 26 | 12 | 8 HUMBERTO | 20.6 | 47.6 | 85 | 972  |
| 1995 | 8 26 | 18 | 8 HUMBERTO | 21.4 | 48.0 | 80 | 975  |
| 1995 | 8 27 | 0  | 8 HUMBERTO | 22.2 | 48.2 | 80 | 980  |
| 1995 | 8 27 | 6  | 8 HUMBERTO | 22.9 | 48.0 | 75 | 982  |
| 1995 | 8 27 | 12 | 8 HUMBERTO | 24.1 | 48.2 | 70 | 984  |
| 1995 | 8 27 | 18 | 8 HUMBERTO | 25.4 | 48.4 | 70 | 986  |
| 1995 | 8 28 | 0  | 8 HUMBERTO | 26.4 | 48.6 | 65 | 992  |
| 1995 | 8 28 | 6  | 8 HUMBERTO | 27.1 | 48.8 | 65 | 994  |
| 1995 | 8 28 | 12 | 8 HUMBERTO | 27.7 | 49.1 | 65 | 991  |
| 1995 | 8 28 | 18 | 8 HUMBERTO | 28.4 | 49.3 | 65 | 987  |
| 1995 | 8 29 | 0  | 8 HUMBERTO | 29.0 | 49.4 | 65 | 985  |
| 1995 | 8 29 | 6  | 8 HUMBERTO | 29.5 | 49.4 | 70 | 983  |
| 1995 | 8 29 | 12 | 8 HUMBERTO | 30.0 | 49.2 | 75 | 981  |
| 1995 | 8 29 | 18 | 8 HUMBERTO | 30.6 | 48.9 | 75 | 979  |
| 1995 | 8 30 | 0  | 8 HUMBERTO | 31.3 | 48.3 | 80 | 978  |
| 1995 | 8 30 | 6  | 8 HUMBERTO | 32.8 | 47.1 | 80 | 976  |
| 1995 | 8 30 | 12 | 8 HUMBERTO | 34.0 | 45.7 | 80 | 974  |
| 1995 | 8 30 | 18 | 8 HUMBERTO | 35.2 | 44.0 | 80 | 971  |
| 1995 | 8 31 | 0  | 8 HUMBERTO | 36.0 | 41.9 | 80 | 970  |
| 1995 | 8 31 | 6  | 8 HUMBERTO | 37.1 | 40.0 | 80 | 971  |
| 1995 | 8 31 | 12 | 8 HUMBERTO | 38.3 | 39.0 | 70 | 985  |
| 1995 | 8 31 | 18 | 8 HUMBERTO | 39.1 | 38.2 | 60 | 995  |
| 1995 | 9 1  | 0  | 8 HUMBERTO | 40.0 | 37.0 | 45 | 1000 |
| 1995 | 8 22 | 12 | 9 IRIS     | 13.2 | 49.3 | 30 | 1008 |
| 1995 | 8 22 | 18 | 9 IRIS     | 13.3 | 50.6 | 35 | 1007 |
| 1995 | 8 23 | 0  | 9 IRIS     | 13.7 | 51.8 | 35 | 1006 |
| 1995 | 8 23 | 6  | 9 IRIS     | 14.0 | 52.5 | 40 | 1004 |
| 1995 | 8 23 | 12 | 9 IRIS     | 14.5 | 53.0 | 55 | 998  |
| 1995 | 8 23 | 18 | 9 IRIS     | 15.0 | 53.4 | 75 | 991  |
| 1995 | 8 24 | 0  | 9 IRIS     | 15.2 | 53.8 | 70 | 992  |
| 1995 | 8 24 | 6  | 9 IRIS     | 15.0 | 54.3 | 70 | 992  |
| 1995 | 8 24 | 12 | 9 IRIS     | 14.8 | 55.1 | 65 | 992  |
| 1995 | 8 24 | 18 | 9 IRIS     | 14.6 | 56.0 | 60 | 992  |
| 1995 | 8 25 | 0  | 9 IRIS     | 14.5 | 56.8 | 55 | 995  |
| 1995 | 8 25 | 6  | 9 IRIS     | 14.3 | 57.8 | 55 | 996  |
| 1995 | 8 25 | 12 | 9 IRIS     | 14.2 | 58.8 | 55 | 999  |
| 1995 | 8 25 | 18 | 9 IRIS     | 14.2 | 59.8 | 50 | 998  |
| 1995 | 8 26 | 0  | 9 IRIS     | 14.0 | 60.3 | 50 | 1000 |
| 1995 | 8 26 | 6  | 9 IRIS     | 14.2 | 60.2 | 45 | 999  |

|      |         |        |      |      |         |
|------|---------|--------|------|------|---------|
| 1995 | 8 26 12 | 9 IRIS | 14.6 | 60.5 | 45 1000 |
| 1995 | 8 26 18 | 9 IRIS | 14.9 | 61.0 | 40 1003 |
| 1995 | 8 27 0  | 9 IRIS | 15.0 | 61.2 | 35 1006 |
| 1995 | 8 27 6  | 9 IRIS | 15.6 | 61.2 | 40 1005 |
| 1995 | 8 27 12 | 9 IRIS | 16.2 | 61.2 | 45 1002 |
| 1995 | 8 27 18 | 9 IRIS | 17.0 | 61.9 | 50 995  |
| 1995 | 8 28 0  | 9 IRIS | 17.8 | 62.0 | 55 993  |
| 1995 | 8 28 6  | 9 IRIS | 18.6 | 62.0 | 55 989  |
| 1995 | 8 28 12 | 9 IRIS | 19.4 | 62.1 | 60 985  |
| 1995 | 8 28 18 | 9 IRIS | 20.4 | 62.4 | 65 983  |
| 1995 | 8 29 0  | 9 IRIS | 21.3 | 62.5 | 70 981  |
| 1995 | 8 29 6  | 9 IRIS | 22.0 | 62.5 | 80 974  |
| 1995 | 8 29 12 | 9 IRIS | 22.6 | 62.5 | 75 973  |
| 1995 | 8 29 18 | 9 IRIS | 23.1 | 62.3 | 70 975  |
| 1995 | 8 30 0  | 9 IRIS | 23.6 | 62.1 | 70 976  |
| 1995 | 8 30 6  | 9 IRIS | 23.8 | 61.8 | 70 977  |
| 1995 | 8 30 12 | 9 IRIS | 24.0 | 61.4 | 75 972  |
| 1995 | 8 30 18 | 9 IRIS | 24.2 | 60.8 | 75 971  |
| 1995 | 8 31 0  | 9 IRIS | 24.5 | 60.1 | 75 971  |
| 1995 | 8 31 6  | 9 IRIS | 24.7 | 59.6 | 75 971  |
| 1995 | 8 31 12 | 9 IRIS | 24.9 | 59.1 | 75 971  |
| 1995 | 8 31 18 | 9 IRIS | 25.0 | 58.9 | 85 968  |
| 1995 | 9 1 0   | 9 IRIS | 25.2 | 58.8 | 90 967  |
| 1995 | 9 1 6   | 9 IRIS | 25.5 | 58.8 | 95 965  |
| 1995 | 9 1 12  | 9 IRIS | 25.6 | 59.0 | 90 967  |
| 1995 | 9 1 18  | 9 IRIS | 25.7 | 59.7 | 85 969  |
| 1995 | 9 2 0   | 9 IRIS | 26.0 | 60.2 | 85 971  |
| 1995 | 9 2 6   | 9 IRIS | 26.6 | 60.2 | 85 973  |
| 1995 | 9 2 12  | 9 IRIS | 27.8 | 59.9 | 80 978  |
| 1995 | 9 2 18  | 9 IRIS | 29.1 | 59.7 | 75 983  |
| 1995 | 9 3 0   | 9 IRIS | 31.3 | 59.0 | 75 982  |
| 1995 | 9 3 6   | 9 IRIS | 34.2 | 58.6 | 75 982  |
| 1995 | 9 3 12  | 9 IRIS | 36.9 | 57.5 | 75 982  |
| 1995 | 9 3 18  | 9 IRIS | 39.2 | 55.5 | 70 985  |
| 1995 | 9 4 0   | 9 IRIS | 41.0 | 52.3 | 65 987  |
| 1995 | 9 4 6   | 9 IRIS | 43.1 | 49.4 | 60 990  |
| 1995 | 9 4 12  | 9 IRIS | 45.0 | 46.0 | 60 995  |
| 1995 | 9 4 18  | 9 IRIS | 47.1 | 42.0 | 55 997  |
| 1995 | 9 5 0   | 9 IRIS | 48.7 | 35.7 | 50 999  |
| 1995 | 9 5 6   | 9 IRIS | 48.9 | 28.1 | 50 998  |
| 1995 | 9 5 12  | 9 IRIS | 48.6 | 25.0 | 50 987  |
| 1995 | 9 5 18  | 9 IRIS | 48.5 | 21.5 | 55 979  |
| 1995 | 9 6 0   | 9 IRIS | 48.3 | 18.0 | 55 972  |
| 1995 | 9 6 6   | 9 IRIS | 48.0 | 14.2 | 60 967  |

|      |   |    |    |    |       |      |      |    |      |
|------|---|----|----|----|-------|------|------|----|------|
| 1995 | 9 | 6  | 12 | 9  | IRIS  | 48.0 | 12.6 | 60 | 963  |
| 1995 | 9 | 6  | 18 | 9  | IRIS  | 48.2 | 11.1 | 65 | 960  |
| 1995 | 9 | 7  | 0  | 9  | IRIS  | 48.4 | 8.7  | 65 | 957  |
| 1995 | 9 | 7  | 6  | 9  | IRIS  | 48.9 | 6.9  | 65 | 962  |
| 1995 | 9 | 7  | 12 | 9  | IRIS  | 49.3 | 4.4  | 60 | 968  |
| 1995 | 8 | 22 | 18 | 10 | JERRY | 23.7 | 78.7 | 20 | 1010 |
| 1995 | 8 | 23 | 0  | 10 | JERRY | 24.2 | 78.9 | 25 | 1009 |
| 1995 | 8 | 23 | 6  | 10 | JERRY | 25.2 | 79.2 | 30 | 1008 |
| 1995 | 8 | 23 | 12 | 10 | JERRY | 26.4 | 79.7 | 35 | 1008 |
| 1995 | 8 | 23 | 18 | 10 | JERRY | 27.0 | 80.2 | 35 | 1006 |
| 1995 | 8 | 24 | 0  | 10 | JERRY | 27.3 | 80.5 | 35 | 1005 |
| 1995 | 8 | 24 | 6  | 10 | JERRY | 27.7 | 81.1 | 35 | 1005 |
| 1995 | 8 | 24 | 12 | 10 | JERRY | 28.4 | 81.8 | 35 | 1004 |
| 1995 | 8 | 24 | 18 | 10 | JERRY | 28.8 | 82.6 | 30 | 1002 |
| 1995 | 8 | 25 | 0  | 10 | JERRY | 29.0 | 82.9 | 30 | 1002 |
| 1995 | 8 | 25 | 6  | 10 | JERRY | 29.2 | 83.3 | 30 | 1002 |
| 1995 | 8 | 25 | 12 | 10 | JERRY | 29.8 | 83.3 | 25 | 1004 |
| 1995 | 8 | 25 | 18 | 10 | JERRY | 30.4 | 83.2 | 25 | 1005 |
| 1995 | 8 | 26 | 0  | 10 | JERRY | 30.7 | 83.4 | 25 | 1005 |
| 1995 | 8 | 26 | 6  | 10 | JERRY | 31.3 | 83.7 | 20 | 1005 |
| 1995 | 8 | 26 | 12 | 10 | JERRY | 31.8 | 83.9 | 20 | 1005 |
| 1995 | 8 | 26 | 18 | 10 | JERRY | 32.4 | 84.0 | 20 | 1006 |
| 1995 | 8 | 27 | 0  | 10 | JERRY | 33.0 | 84.0 | 20 | 1006 |
| 1995 | 8 | 27 | 6  | 10 | JERRY | 33.5 | 83.9 | 20 | 1006 |
| 1995 | 8 | 27 | 12 | 10 | JERRY | 33.8 | 83.6 | 20 | 1006 |
| 1995 | 8 | 27 | 18 | 10 | JERRY | 33.9 | 83.0 | 20 | 1006 |
| 1995 | 8 | 28 | 0  | 10 | JERRY | 33.8 | 82.4 | 20 | 1006 |
| 1995 | 8 | 26 | 12 | 11 | KAREN | 15.4 | 32.7 | 30 | 1009 |
| 1995 | 8 | 26 | 18 | 11 | KAREN | 15.5 | 34.0 | 30 | 1008 |
| 1995 | 8 | 27 | 0  | 11 | KAREN | 15.6 | 35.4 | 30 | 1008 |
| 1995 | 8 | 27 | 6  | 11 | KAREN | 15.8 | 36.7 | 30 | 1007 |
| 1995 | 8 | 27 | 12 | 11 | KAREN | 16.1 | 38.0 | 30 | 1007 |
| 1995 | 8 | 27 | 18 | 11 | KAREN | 16.3 | 39.3 | 30 | 1006 |
| 1995 | 8 | 28 | 0  | 11 | KAREN | 16.5 | 40.4 | 30 | 1006 |
| 1995 | 8 | 28 | 6  | 11 | KAREN | 16.6 | 41.5 | 35 | 1005 |
| 1995 | 8 | 28 | 12 | 11 | KAREN | 16.9 | 42.6 | 40 | 1003 |
| 1995 | 8 | 28 | 18 | 11 | KAREN | 17.4 | 43.6 | 45 | 1001 |
| 1995 | 8 | 29 | 0  | 11 | KAREN | 17.7 | 44.6 | 45 | 1000 |
| 1995 | 8 | 29 | 6  | 11 | KAREN | 17.8 | 45.5 | 45 | 1000 |
| 1995 | 8 | 29 | 12 | 11 | KAREN | 18.1 | 46.4 | 45 | 1000 |
| 1995 | 8 | 29 | 18 | 11 | KAREN | 18.5 | 47.3 | 45 | 1001 |
| 1995 | 8 | 30 | 0  | 11 | KAREN | 19.0 | 48.2 | 45 | 1002 |
| 1995 | 8 | 30 | 6  | 11 | KAREN | 19.2 | 49.1 | 40 | 1003 |
| 1995 | 8 | 30 | 12 | 11 | KAREN | 19.4 | 49.9 | 40 | 1003 |

|      |   |    |    |    |       |      |      |     |      |
|------|---|----|----|----|-------|------|------|-----|------|
| 1995 | 8 | 30 | 18 | 11 | KAREN | 19.6 | 50.6 | 40  | 1004 |
| 1995 | 8 | 31 | 0  | 11 | KAREN | 20.0 | 51.1 | 40  | 1004 |
| 1995 | 8 | 31 | 6  | 11 | KAREN | 20.3 | 51.6 | 40  | 1003 |
| 1995 | 8 | 31 | 12 | 11 | KAREN | 20.4 | 51.9 | 40  | 1002 |
| 1995 | 8 | 31 | 18 | 11 | KAREN | 20.8 | 52.1 | 40  | 1001 |
| 1995 | 9 | 1  | 0  | 11 | KAREN | 21.6 | 52.3 | 40  | 1001 |
| 1995 | 9 | 1  | 6  | 11 | KAREN | 22.9 | 52.7 | 40  | 1001 |
| 1995 | 9 | 1  | 12 | 11 | KAREN | 24.6 | 53.3 | 35  | 1001 |
| 1995 | 9 | 1  | 18 | 11 | KAREN | 26.6 | 54.3 | 35  | 1001 |
| 1995 | 9 | 2  | 0  | 11 | KAREN | 28.4 | 55.6 | 35  | 1001 |
| 1995 | 9 | 2  | 6  | 11 | KAREN | 29.9 | 57.1 | 35  | 1001 |
| 1995 | 9 | 2  | 12 | 11 | KAREN | 31.2 | 59.2 | 30  | 1001 |
| 1995 | 9 | 2  | 18 | 11 | KAREN | 32.4 | 61.9 | 30  | 1001 |
| 1995 | 9 | 3  | 0  | 11 | KAREN | 33.0 | 61.5 | 30  | 1002 |
| 1995 | 8 | 27 | 12 | 12 | LUIS  | 11.3 | 22.7 | 25  | 1010 |
| 1995 | 8 | 27 | 18 | 12 | LUIS  | 11.1 | 23.8 | 25  | 1010 |
| 1995 | 8 | 28 | 0  | 12 | LUIS  | 11.0 | 24.3 | 25  | 1009 |
| 1995 | 8 | 28 | 6  | 12 | LUIS  | 10.9 | 24.9 | 25  | 1009 |
| 1995 | 8 | 28 | 12 | 12 | LUIS  | 11.1 | 26.0 | 30  | 1008 |
| 1995 | 8 | 28 | 18 | 12 | LUIS  | 11.4 | 27.5 | 30  | 1008 |
| 1995 | 8 | 29 | 0  | 12 | LUIS  | 11.6 | 29.0 | 35  | 1005 |
| 1995 | 8 | 29 | 6  | 12 | LUIS  | 11.8 | 30.5 | 40  | 1000 |
| 1995 | 8 | 29 | 12 | 12 | LUIS  | 12.2 | 31.9 | 40  | 1000 |
| 1995 | 8 | 29 | 18 | 12 | LUIS  | 12.7 | 33.1 | 40  | 1003 |
| 1995 | 8 | 30 | 0  | 12 | LUIS  | 13.0 | 34.2 | 40  | 1005 |
| 1995 | 8 | 30 | 6  | 12 | LUIS  | 13.2 | 35.3 | 45  | 1005 |
| 1995 | 8 | 30 | 12 | 12 | LUIS  | 13.4 | 36.2 | 55  | 1005 |
| 1995 | 8 | 30 | 18 | 12 | LUIS  | 13.7 | 37.0 | 65  | 1002 |
| 1995 | 8 | 31 | 0  | 12 | LUIS  | 14.0 | 37.9 | 70  | 998  |
| 1995 | 8 | 31 | 6  | 12 | LUIS  | 14.3 | 38.8 | 80  | 992  |
| 1995 | 8 | 31 | 12 | 12 | LUIS  | 14.6 | 39.7 | 85  | 979  |
| 1995 | 8 | 31 | 18 | 12 | LUIS  | 15.0 | 40.7 | 95  | 971  |
| 1995 | 9 | 1  | 0  | 12 | LUIS  | 15.4 | 41.7 | 100 | 965  |
| 1995 | 9 | 1  | 6  | 12 | LUIS  | 15.8 | 42.6 | 105 | 958  |
| 1995 | 9 | 1  | 12 | 12 | LUIS  | 16.2 | 43.6 | 115 | 950  |
| 1995 | 9 | 1  | 18 | 12 | LUIS  | 16.5 | 44.7 | 115 | 948  |
| 1995 | 9 | 2  | 0  | 12 | LUIS  | 16.8 | 45.8 | 115 | 948  |
| 1995 | 9 | 2  | 6  | 12 | LUIS  | 17.0 | 46.9 | 115 | 948  |
| 1995 | 9 | 2  | 12 | 12 | LUIS  | 17.2 | 48.0 | 115 | 948  |
| 1995 | 9 | 2  | 18 | 12 | LUIS  | 17.3 | 49.2 | 115 | 948  |
| 1995 | 9 | 3  | 0  | 12 | LUIS  | 17.3 | 50.5 | 115 | 948  |
| 1995 | 9 | 3  | 6  | 12 | LUIS  | 17.4 | 51.8 | 120 | 948  |
| 1995 | 9 | 3  | 12 | 12 | LUIS  | 17.3 | 53.1 | 120 | 948  |
| 1995 | 9 | 3  | 18 | 12 | LUIS  | 17.3 | 54.3 | 120 | 945  |

|      |   |    |    |    |         |      |      |     |      |
|------|---|----|----|----|---------|------|------|-----|------|
| 1995 | 9 | 4  | 0  | 12 | LUIS    | 17.1 | 55.6 | 120 | 942  |
| 1995 | 9 | 4  | 6  | 12 | LUIS    | 17.0 | 56.8 | 120 | 940  |
| 1995 | 9 | 4  | 12 | 12 | LUIS    | 17.0 | 58.0 | 120 | 945  |
| 1995 | 9 | 4  | 18 | 12 | LUIS    | 17.0 | 59.1 | 120 | 943  |
| 1995 | 9 | 5  | 0  | 12 | LUIS    | 17.1 | 60.1 | 120 | 940  |
| 1995 | 9 | 5  | 6  | 12 | LUIS    | 17.3 | 61.0 | 120 | 939  |
| 1995 | 9 | 5  | 12 | 12 | LUIS    | 17.5 | 61.7 | 115 | 945  |
| 1995 | 9 | 5  | 18 | 12 | LUIS    | 18.0 | 62.4 | 115 | 944  |
| 1995 | 9 | 6  | 0  | 12 | LUIS    | 18.4 | 63.0 | 115 | 942  |
| 1995 | 9 | 6  | 6  | 12 | LUIS    | 18.9 | 63.6 | 115 | 939  |
| 1995 | 9 | 6  | 12 | 12 | LUIS    | 19.4 | 64.2 | 115 | 943  |
| 1995 | 9 | 6  | 18 | 12 | LUIS    | 20.1 | 64.9 | 115 | 940  |
| 1995 | 9 | 7  | 0  | 12 | LUIS    | 20.7 | 65.4 | 115 | 938  |
| 1995 | 9 | 7  | 6  | 12 | LUIS    | 21.3 | 66.0 | 115 | 936  |
| 1995 | 9 | 7  | 12 | 12 | LUIS    | 22.0 | 66.6 | 110 | 941  |
| 1995 | 9 | 7  | 18 | 12 | LUIS    | 22.8 | 67.2 | 110 | 938  |
| 1995 | 9 | 8  | 0  | 12 | LUIS    | 24.3 | 68.0 | 110 | 935  |
| 1995 | 9 | 8  | 6  | 12 | LUIS    | 25.8 | 68.8 | 110 | 939  |
| 1995 | 9 | 8  | 12 | 12 | LUIS    | 26.4 | 69.3 | 105 | 941  |
| 1995 | 9 | 8  | 18 | 12 | LUIS    | 26.5 | 69.5 | 100 | 944  |
| 1995 | 9 | 9  | 0  | 12 | LUIS    | 27.1 | 69.8 | 95  | 945  |
| 1995 | 9 | 9  | 6  | 12 | LUIS    | 29.1 | 69.5 | 90  | 949  |
| 1995 | 9 | 9  | 12 | 12 | LUIS    | 31.0 | 69.1 | 85  | 952  |
| 1995 | 9 | 9  | 18 | 12 | LUIS    | 32.7 | 68.6 | 85  | 955  |
| 1995 | 9 | 10 | 0  | 12 | LUIS    | 34.5 | 67.2 | 85  | 959  |
| 1995 | 9 | 10 | 6  | 12 | LUIS    | 36.5 | 65.4 | 85  | 963  |
| 1995 | 9 | 10 | 12 | 12 | LUIS    | 38.4 | 63.7 | 80  | 961  |
| 1995 | 9 | 10 | 18 | 12 | LUIS    | 40.9 | 60.9 | 80  | 966  |
| 1995 | 9 | 11 | 0  | 12 | LUIS    | 43.9 | 57.7 | 80  | 965  |
| 1995 | 9 | 11 | 6  | 12 | LUIS    | 47.1 | 54.2 | 80  | 963  |
| 1995 | 9 | 11 | 12 | 12 | LUIS    | 51.5 | 48.5 | 70  | 960  |
| 1995 | 9 | 11 | 18 | 12 | LUIS    | 55.0 | 46.0 | 60  | 958  |
| 1995 | 9 | 12 | 0  | 12 | LUIS    | 57.0 | 45.0 | 60  | 955  |
| 1995 | 9 | 12 | 6  | 12 | LUIS    | 58.0 | 44.0 | 60  | 950  |
| 1995 | 9 | 12 | 12 | 12 | LUIS    | 59.0 | 42.0 | 60  | 955  |
| 1995 | 9 | 12 | 18 | 12 | LUIS    | 60.0 | 40.0 | 50  | 960  |
| 1995 | 9 | 12 | 18 | 13 | MARILYN | 11.7 | 50.9 | 30  | 1006 |
| 1995 | 9 | 13 | 0  | 13 | MARILYN | 11.8 | 52.7 | 35  | 1004 |
| 1995 | 9 | 13 | 6  | 13 | MARILYN | 11.9 | 54.3 | 45  | 999  |
| 1995 | 9 | 13 | 12 | 13 | MARILYN | 12.1 | 55.4 | 55  | 995  |
| 1995 | 9 | 13 | 18 | 13 | MARILYN | 12.5 | 56.5 | 60  | 990  |
| 1995 | 9 | 14 | 0  | 13 | MARILYN | 13.0 | 57.7 | 65  | 988  |
| 1995 | 9 | 14 | 6  | 13 | MARILYN | 13.5 | 58.8 | 70  | 987  |
| 1995 | 9 | 14 | 12 | 13 | MARILYN | 14.2 | 59.8 | 70  | 986  |

|      |            |         |      |      |     |      |
|------|------------|---------|------|------|-----|------|
| 1995 | 9 14 18 13 | MARILYN | 15.0 | 60.8 | 70  | 983  |
| 1995 | 9 15 0 13  | MARILYN | 15.8 | 61.7 | 75  | 985  |
| 1995 | 9 15 6 13  | MARILYN | 16.5 | 62.8 | 80  | 977  |
| 1995 | 9 15 12 13 | MARILYN | 16.8 | 63.5 | 80  | 974  |
| 1995 | 9 15 18 13 | MARILYN | 17.4 | 64.2 | 85  | 969  |
| 1995 | 9 16 0 13  | MARILYN | 17.9 | 64.7 | 90  | 962  |
| 1995 | 9 16 6 13  | MARILYN | 18.5 | 65.2 | 95  | 952  |
| 1995 | 9 16 12 13 | MARILYN | 19.0 | 65.8 | 95  | 951  |
| 1995 | 9 16 18 13 | MARILYN | 19.7 | 66.4 | 100 | 950  |
| 1995 | 9 17 0 13  | MARILYN | 20.4 | 67.0 | 100 | 950  |
| 1995 | 9 17 6 13  | MARILYN | 21.2 | 67.5 | 95  | 953  |
| 1995 | 9 17 12 13 | MARILYN | 22.0 | 68.2 | 80  | 965  |
| 1995 | 9 17 18 13 | MARILYN | 22.9 | 68.8 | 80  | 968  |
| 1995 | 9 18 0 13  | MARILYN | 24.0 | 69.1 | 85  | 963  |
| 1995 | 9 18 6 13  | MARILYN | 25.0 | 69.4 | 85  | 965  |
| 1995 | 9 18 12 13 | MARILYN | 26.1 | 69.5 | 85  | 966  |
| 1995 | 9 18 18 13 | MARILYN | 27.2 | 69.3 | 80  | 966  |
| 1995 | 9 19 0 13  | MARILYN | 28.4 | 69.0 | 80  | 969  |
| 1995 | 9 19 6 13  | MARILYN | 29.6 | 68.6 | 75  | 970  |
| 1995 | 9 19 12 13 | MARILYN | 31.0 | 68.2 | 75  | 976  |
| 1995 | 9 19 18 13 | MARILYN | 32.6 | 67.7 | 80  | 974  |
| 1995 | 9 20 0 13  | MARILYN | 34.2 | 66.8 | 80  | 974  |
| 1995 | 9 20 6 13  | MARILYN | 35.8 | 66.1 | 75  | 976  |
| 1995 | 9 20 12 13 | MARILYN | 37.3 | 65.2 | 70  | 978  |
| 1995 | 9 20 18 13 | MARILYN | 38.3 | 64.3 | 70  | 980  |
| 1995 | 9 21 0 13  | MARILYN | 39.0 | 63.3 | 65  | 982  |
| 1995 | 9 21 6 13  | MARILYN | 39.3 | 61.9 | 65  | 984  |
| 1995 | 9 21 12 13 | MARILYN | 39.4 | 60.6 | 65  | 987  |
| 1995 | 9 21 18 13 | MARILYN | 39.6 | 59.3 | 60  | 990  |
| 1995 | 9 22 0 13  | MARILYN | 39.8 | 58.3 | 55  | 992  |
| 1995 | 9 22 6 13  | MARILYN | 39.7 | 57.6 | 55  | 994  |
| 1995 | 9 22 12 13 | MARILYN | 39.4 | 57.1 | 55  | 996  |
| 1995 | 9 22 18 13 | MARILYN | 39.0 | 56.8 | 55  | 998  |
| 1995 | 9 23 0 13  | MARILYN | 38.4 | 56.7 | 50  | 1000 |
| 1995 | 9 23 6 13  | MARILYN | 37.8 | 56.7 | 45  | 1001 |
| 1995 | 9 23 12 13 | MARILYN | 37.1 | 56.7 | 35  | 1002 |
| 1995 | 9 23 18 13 | MARILYN | 36.6 | 56.8 | 30  | 1003 |
| 1995 | 9 24 0 13  | MARILYN | 35.9 | 57.2 | 30  | 1004 |
| 1995 | 9 24 6 13  | MARILYN | 35.0 | 58.1 | 30  | 1004 |
| 1995 | 9 24 12 13 | MARILYN | 33.8 | 57.7 | 30  | 1005 |
| 1995 | 9 24 18 13 | MARILYN | 33.0 | 57.0 | 30  | 1005 |
| 1995 | 9 25 0 13  | MARILYN | 32.6 | 56.6 | 30  | 1005 |
| 1995 | 9 25 6 13  | MARILYN | 32.0 | 56.3 | 30  | 1005 |
| 1995 | 9 25 12 13 | MARILYN | 31.1 | 56.0 | 30  | 1005 |

|      |    |    |    |    |         |      |      |    |      |
|------|----|----|----|----|---------|------|------|----|------|
| 1995 | 9  | 25 | 18 | 13 | MARILYN | 30.9 | 55.1 | 30 | 1005 |
| 1995 | 9  | 26 | 0  | 13 | MARILYN | 31.0 | 54.7 | 25 | 1006 |
| 1995 | 9  | 26 | 6  | 13 | MARILYN | 31.1 | 54.2 | 25 | 1006 |
| 1995 | 9  | 26 | 12 | 13 | MARILYN | 31.3 | 53.8 | 25 | 1007 |
| 1995 | 9  | 26 | 18 | 13 | MARILYN | 31.5 | 53.4 | 25 | 1008 |
| 1995 | 9  | 27 | 0  | 13 | MARILYN | 31.7 | 53.1 | 20 | 1009 |
| 1995 | 9  | 27 | 6  | 13 | MARILYN | 31.8 | 52.6 | 20 | 1010 |
| 1995 | 9  | 27 | 12 | 13 | MARILYN | 32.2 | 52.1 | 20 | 1011 |
| 1995 | 9  | 27 | 18 | 13 | MARILYN | 32.6 | 51.7 | 20 | 1012 |
| 1995 | 9  | 28 | 0  | 13 | MARILYN | 32.9 | 51.4 | 20 | 1013 |
| 1995 | 9  | 28 | 6  | 13 | MARILYN | 33.2 | 51.1 | 20 | 1014 |
| 1995 | 9  | 28 | 12 | 13 | MARILYN | 33.6 | 50.9 | 20 | 1014 |
| 1995 | 9  | 28 | 18 | 13 | MARILYN | 34.0 | 50.6 | 20 | 1013 |
| 1995 | 9  | 29 | 0  | 13 | MARILYN | 34.3 | 49.9 | 20 | 1013 |
| 1995 | 9  | 29 | 6  | 13 | MARILYN | 34.8 | 49.1 | 20 | 1014 |
| 1995 | 9  | 29 | 12 | 13 | MARILYN | 35.3 | 48.2 | 20 | 1014 |
| 1995 | 9  | 29 | 18 | 13 | MARILYN | 35.3 | 47.2 | 20 | 1014 |
| 1995 | 9  | 30 | 0  | 13 | MARILYN | 34.9 | 47.7 | 20 | 1015 |
| 1995 | 9  | 30 | 6  | 13 | MARILYN | 34.6 | 48.5 | 20 | 1015 |
| 1995 | 9  | 30 | 12 | 13 | MARILYN | 34.6 | 49.3 | 20 | 1016 |
| 1995 | 9  | 30 | 18 | 13 | MARILYN | 34.7 | 50.0 | 20 | 1016 |
| 1995 | 10 | 1  | 0  | 13 | MARILYN | 34.8 | 50.5 | 20 | 1016 |
| 1995 | 10 | 1  | 6  | 13 | MARILYN | 35.0 | 51.0 | 20 | 1016 |
| 1995 | 10 | 1  | 12 | 13 | MARILYN | 35.2 | 51.5 | 20 | 1016 |
| 1995 | 10 | 1  | 18 | 13 | MARILYN | 35.3 | 51.9 | 20 | 1016 |
| 1995 | 9  | 26 | 18 | 14 | NOEL    | 10.4 | 37.7 | 25 | 1007 |
| 1995 | 9  | 27 | 0  | 14 | NOEL    | 10.9 | 39.0 | 30 | 1006 |
| 1995 | 9  | 27 | 6  | 14 | NOEL    | 11.4 | 40.0 | 30 | 1005 |
| 1995 | 9  | 27 | 12 | 14 | NOEL    | 12.1 | 40.6 | 35 | 1005 |
| 1995 | 9  | 27 | 18 | 14 | NOEL    | 12.8 | 41.0 | 40 | 1002 |
| 1995 | 9  | 28 | 0  | 14 | NOEL    | 13.5 | 41.5 | 45 | 1000 |
| 1995 | 9  | 28 | 6  | 14 | NOEL    | 14.0 | 42.0 | 50 | 998  |
| 1995 | 9  | 28 | 12 | 14 | NOEL    | 14.5 | 42.4 | 60 | 995  |
| 1995 | 9  | 28 | 18 | 14 | NOEL    | 15.2 | 42.6 | 65 | 987  |
| 1995 | 9  | 29 | 0  | 14 | NOEL    | 15.9 | 42.6 | 65 | 987  |
| 1995 | 9  | 29 | 6  | 14 | NOEL    | 16.5 | 42.2 | 65 | 987  |
| 1995 | 9  | 29 | 12 | 14 | NOEL    | 17.4 | 41.9 | 65 | 987  |
| 1995 | 9  | 29 | 18 | 14 | NOEL    | 18.2 | 41.2 | 65 | 987  |
| 1995 | 9  | 30 | 0  | 14 | NOEL    | 18.9 | 40.6 | 65 | 987  |
| 1995 | 9  | 30 | 6  | 14 | NOEL    | 19.4 | 40.3 | 65 | 987  |
| 1995 | 9  | 30 | 12 | 14 | NOEL    | 19.7 | 40.2 | 60 | 990  |
| 1995 | 9  | 30 | 18 | 14 | NOEL    | 19.8 | 40.1 | 55 | 993  |
| 1995 | 10 | 1  | 0  | 14 | NOEL    | 19.9 | 40.2 | 50 | 994  |
| 1995 | 10 | 1  | 6  | 14 | NOEL    | 20.0 | 40.3 | 50 | 995  |



|         |                 |      |      |         |
|---------|-----------------|------|------|---------|
| 1995 10 | 1 12 14 NOEL    | 20.1 | 40.4 | 45 1000 |
| 1995 10 | 1 18 14 NOEL    | 20.5 | 40.4 | 45 1000 |
| 1995 10 | 2 0 14 NOEL     | 20.9 | 40.2 | 45 1000 |
| 1995 10 | 2 6 14 NOEL     | 21.5 | 40.1 | 45 1000 |
| 1995 10 | 2 12 14 NOEL    | 22.4 | 40.0 | 45 1000 |
| 1995 10 | 2 18 14 NOEL    | 23.5 | 40.1 | 45 1000 |
| 1995 10 | 3 0 14 NOEL     | 24.7 | 40.3 | 45 1000 |
| 1995 10 | 3 6 14 NOEL     | 25.7 | 41.0 | 40 1000 |
| 1995 10 | 3 12 14 NOEL    | 26.7 | 41.8 | 45 1000 |
| 1995 10 | 3 18 14 NOEL    | 27.6 | 42.4 | 45 1000 |
| 1995 10 | 4 0 14 NOEL     | 28.5 | 42.8 | 45 999  |
| 1995 10 | 4 6 14 NOEL     | 29.5 | 43.1 | 50 998  |
| 1995 10 | 4 12 14 NOEL    | 30.4 | 43.1 | 50 997  |
| 1995 10 | 4 18 14 NOEL    | 31.3 | 43.0 | 55 994  |
| 1995 10 | 5 0 14 NOEL     | 31.9 | 42.7 | 65 987  |
| 1995 10 | 5 6 14 NOEL     | 32.2 | 42.3 | 65 987  |
| 1995 10 | 5 12 14 NOEL    | 32.4 | 41.5 | 65 987  |
| 1995 10 | 5 18 14 NOEL    | 32.4 | 40.5 | 65 987  |
| 1995 10 | 6 0 14 NOEL     | 32.5 | 39.4 | 60 990  |
| 1995 10 | 6 6 14 NOEL     | 32.5 | 38.2 | 55 994  |
| 1995 10 | 6 12 14 NOEL    | 32.5 | 36.9 | 50 997  |
| 1995 10 | 6 18 14 NOEL    | 32.7 | 35.3 | 40 1001 |
| 1995 10 | 7 0 14 NOEL     | 33.2 | 33.5 | 35 1004 |
| 1995 10 | 7 6 14 NOEL     | 34.0 | 31.0 | 30 1000 |
| 1995 10 | 7 12 14 NOEL    | 35.0 | 29.5 | 30 997  |
| 1995 10 | 7 18 14 NOEL    | 36.0 | 28.0 | 30 995  |
| 1995    | 9 27 18 15 OPAL | 19.1 | 87.3 | 25 1004 |
| 1995    | 9 28 0 15 OPAL  | 19.4 | 87.5 | 25 1004 |
| 1995    | 9 28 6 15 OPAL  | 19.4 | 87.9 | 25 1004 |
| 1995    | 9 28 12 15 OPAL | 19.3 | 88.2 | 25 1003 |
| 1995    | 9 28 18 15 OPAL | 19.3 | 88.4 | 25 1003 |
| 1995    | 9 29 0 15 OPAL  | 19.4 | 88.4 | 25 1003 |
| 1995    | 9 29 6 15 OPAL  | 19.5 | 88.4 | 25 1003 |
| 1995    | 9 29 12 15 OPAL | 19.6 | 88.3 | 25 1003 |
| 1995    | 9 29 18 15 OPAL | 19.8 | 88.2 | 30 1003 |
| 1995    | 9 30 0 15 OPAL  | 20.1 | 88.2 | 30 1002 |
| 1995    | 9 30 6 15 OPAL  | 20.6 | 88.3 | 30 1002 |
| 1995    | 9 30 12 15 OPAL | 21.1 | 88.5 | 35 1001 |
| 1995    | 9 30 18 15 OPAL | 21.4 | 89.1 | 40 1000 |
| 1995 10 | 1 0 15 OPAL     | 21.3 | 89.9 | 45 994  |
| 1995 10 | 1 6 15 OPAL     | 21.1 | 90.7 | 45 987  |
| 1995 10 | 1 12 15 OPAL    | 20.9 | 91.2 | 45 986  |
| 1995 10 | 1 18 15 OPAL    | 20.8 | 91.6 | 50 985  |
| 1995 10 | 2 0 15 OPAL     | 20.7 | 91.9 | 55 984  |

|         |   |    |    |         |      |      |     |      |
|---------|---|----|----|---------|------|------|-----|------|
| 1995 10 | 2 | 6  | 15 | OPAL    | 20.8 | 92.1 | 60  | 980  |
| 1995 10 | 2 | 12 | 15 | OPAL    | 21.0 | 92.3 | 65  | 973  |
| 1995 10 | 2 | 18 | 15 | OPAL    | 21.2 | 92.3 | 65  | 972  |
| 1995 10 | 3 | 0  | 15 | OPAL    | 21.7 | 92.2 | 70  | 970  |
| 1995 10 | 3 | 6  | 15 | OPAL    | 22.2 | 92.0 | 75  | 969  |
| 1995 10 | 3 | 12 | 15 | OPAL    | 22.8 | 91.6 | 80  | 968  |
| 1995 10 | 3 | 18 | 15 | OPAL    | 23.5 | 91.0 | 85  | 965  |
| 1995 10 | 4 | 0  | 15 | OPAL    | 24.5 | 90.1 | 100 | 953  |
| 1995 10 | 4 | 6  | 15 | OPAL    | 25.9 | 89.4 | 110 | 935  |
| 1995 10 | 4 | 12 | 15 | OPAL    | 27.3 | 88.5 | 130 | 919  |
| 1995 10 | 4 | 18 | 15 | OPAL    | 29.0 | 87.7 | 110 | 938  |
| 1995 10 | 5 | 0  | 15 | OPAL    | 31.0 | 86.8 | 80  | 950  |
| 1995 10 | 5 | 6  | 15 | OPAL    | 33.2 | 86.2 | 50  | 974  |
| 1995 10 | 5 | 12 | 15 | OPAL    | 35.4 | 85.7 | 30  | 982  |
| 1995 10 | 5 | 18 | 15 | OPAL    | 38.5 | 83.5 | 40  | 986  |
| 1995 10 | 6 | 0  | 15 | OPAL    | 40.5 | 82.3 | 40  | 989  |
| 1995 10 | 6 | 6  | 15 | OPAL    | 42.0 | 80.5 | 40  | 991  |
| 1995 10 | 6 | 12 | 15 | OPAL    | 43.3 | 78.4 | 35  | 997  |
| 1995 10 | 6 | 18 | 15 | OPAL    | 44.5 | 76.5 | 30  | 1002 |
| 1995 10 | 4 | 18 | 16 | PABLO   | 8.3  | 31.4 | 30  | 1009 |
| 1995 10 | 5 | 0  | 16 | PABLO   | 8.4  | 32.8 | 30  | 1009 |
| 1995 10 | 5 | 6  | 16 | PABLO   | 9.3  | 35.1 | 30  | 1008 |
| 1995 10 | 5 | 12 | 16 | PABLO   | 10.2 | 37.5 | 35  | 1006 |
| 1995 10 | 5 | 18 | 16 | PABLO   | 11.1 | 40.1 | 40  | 1003 |
| 1995 10 | 6 | 0  | 16 | PABLO   | 11.5 | 41.9 | 50  | 997  |
| 1995 10 | 6 | 6  | 16 | PABLO   | 12.0 | 44.0 | 50  | 994  |
| 1995 10 | 6 | 12 | 16 | PABLO   | 12.2 | 45.8 | 50  | 995  |
| 1995 10 | 6 | 18 | 16 | PABLO   | 12.4 | 47.5 | 45  | 998  |
| 1995 10 | 7 | 0  | 16 | PABLO   | 12.5 | 48.8 | 45  | 1000 |
| 1995 10 | 7 | 6  | 16 | PABLO   | 12.7 | 50.0 | 45  | 1000 |
| 1995 10 | 7 | 12 | 16 | PABLO   | 12.8 | 51.1 | 45  | 1000 |
| 1995 10 | 7 | 18 | 16 | PABLO   | 12.6 | 52.3 | 45  | 1000 |
| 1995 10 | 8 | 0  | 16 | PABLO   | 12.5 | 53.9 | 45  | 1001 |
| 1995 10 | 8 | 6  | 16 | PABLO   | 12.3 | 55.7 | 45  | 1007 |
| 1995 10 | 8 | 12 | 16 | PABLO   | 12.1 | 57.5 | 30  | 1009 |
| 1995 10 | 7 | 18 | 17 | ROXANNE | 14.0 | 82.1 | 25  | 1005 |
| 1995 10 | 8 | 0  | 17 | ROXANNE | 14.2 | 82.7 | 25  | 1005 |
| 1995 10 | 8 | 6  | 17 | ROXANNE | 14.8 | 83.0 | 25  | 1005 |
| 1995 10 | 8 | 12 | 17 | ROXANNE | 15.0 | 83.2 | 25  | 1005 |
| 1995 10 | 8 | 18 | 17 | ROXANNE | 15.7 | 83.2 | 30  | 1004 |
| 1995 10 | 9 | 0  | 17 | ROXANNE | 16.5 | 83.1 | 35  | 1002 |
| 1995 10 | 9 | 6  | 17 | ROXANNE | 17.2 | 83.0 | 40  | 1001 |
| 1995 10 | 9 | 12 | 17 | ROXANNE | 17.9 | 82.9 | 45  | 999  |
| 1995 10 | 9 | 18 | 17 | ROXANNE | 18.4 | 82.9 | 50  | 995  |

|            |       |         |      |      |     |      |
|------------|-------|---------|------|------|-----|------|
| 1995 10 10 | 0 17  | ROXANNE | 18.9 | 83.7 | 60  | 989  |
| 1995 10 10 | 6 17  | ROXANNE | 19.2 | 84.3 | 70  | 985  |
| 1995 10 10 | 12 17 | ROXANNE | 19.4 | 85.0 | 80  | 972  |
| 1995 10 10 | 18 17 | ROXANNE | 19.9 | 86.0 | 95  | 966  |
| 1995 10 11 | 0 17  | ROXANNE | 20.0 | 87.0 | 100 | 958  |
| 1995 10 11 | 6 17  | ROXANNE | 20.0 | 88.1 | 90  | 970  |
| 1995 10 11 | 12 17 | ROXANNE | 19.9 | 89.1 | 75  | 983  |
| 1995 10 11 | 18 17 | ROXANNE | 19.7 | 90.0 | 70  | 987  |
| 1995 10 12 | 0 17  | ROXANNE | 19.5 | 90.8 | 65  | 990  |
| 1995 10 12 | 6 17  | ROXANNE | 19.5 | 91.5 | 65  | 992  |
| 1995 10 12 | 12 17 | ROXANNE | 19.5 | 92.2 | 55  | 994  |
| 1995 10 12 | 18 17 | ROXANNE | 19.7 | 92.6 | 55  | 995  |
| 1995 10 13 | 0 17  | ROXANNE | 20.1 | 92.8 | 55  | 993  |
| 1995 10 13 | 6 17  | ROXANNE | 20.5 | 93.1 | 55  | 993  |
| 1995 10 13 | 12 17 | ROXANNE | 21.0 | 93.6 | 55  | 992  |
| 1995 10 13 | 18 17 | ROXANNE | 21.4 | 93.9 | 55  | 988  |
| 1995 10 14 | 0 17  | ROXANNE | 21.8 | 93.9 | 55  | 982  |
| 1995 10 14 | 6 17  | ROXANNE | 22.2 | 93.9 | 60  | 981  |
| 1995 10 14 | 12 17 | ROXANNE | 22.3 | 93.8 | 65  | 980  |
| 1995 10 14 | 18 17 | ROXANNE | 22.3 | 93.3 | 70  | 980  |
| 1995 10 15 | 0 17  | ROXANNE | 21.8 | 92.9 | 70  | 979  |
| 1995 10 15 | 6 17  | ROXANNE | 21.4 | 92.4 | 75  | 979  |
| 1995 10 15 | 12 17 | ROXANNE | 21.0 | 91.9 | 75  | 980  |
| 1995 10 15 | 18 17 | ROXANNE | 20.6 | 91.6 | 75  | 980  |
| 1995 10 16 | 0 17  | ROXANNE | 20.4 | 91.5 | 75  | 981  |
| 1995 10 16 | 6 17  | ROXANNE | 20.3 | 91.7 | 70  | 984  |
| 1995 10 16 | 12 17 | ROXANNE | 20.3 | 92.0 | 65  | 985  |
| 1995 10 16 | 18 17 | ROXANNE | 20.4 | 92.2 | 65  | 987  |
| 1995 10 17 | 0 17  | ROXANNE | 20.6 | 92.4 | 65  | 991  |
| 1995 10 17 | 6 17  | ROXANNE | 20.9 | 92.6 | 60  | 995  |
| 1995 10 17 | 12 17 | ROXANNE | 21.2 | 92.9 | 55  | 998  |
| 1995 10 17 | 18 17 | ROXANNE | 21.3 | 93.1 | 50  | 1000 |
| 1995 10 18 | 0 17  | ROXANNE | 21.5 | 93.3 | 45  | 1003 |
| 1995 10 18 | 6 17  | ROXANNE | 21.8 | 93.6 | 40  | 1004 |
| 1995 10 18 | 12 17 | ROXANNE | 22.2 | 94.2 | 35  | 1005 |
| 1995 10 18 | 18 17 | ROXANNE | 22.3 | 94.7 | 35  | 1008 |
| 1995 10 19 | 0 17  | ROXANNE | 22.3 | 95.1 | 30  | 1009 |
| 1995 10 19 | 6 17  | ROXANNE | 22.4 | 95.4 | 30  | 1009 |
| 1995 10 19 | 12 17 | ROXANNE | 22.3 | 95.5 | 30  | 1009 |
| 1995 10 19 | 18 17 | ROXANNE | 22.3 | 95.6 | 30  | 1009 |
| 1995 10 20 | 0 17  | ROXANNE | 22.4 | 95.6 | 30  | 1009 |
| 1995 10 20 | 6 17  | ROXANNE | 22.0 | 95.5 | 30  | 1009 |
| 1995 10 20 | 12 17 | ROXANNE | 21.5 | 95.5 | 25  | 1009 |
| 1995 10 20 | 18 17 | ROXANNE | 20.5 | 95.5 | 25  | 1010 |

|            |         |           |      |      |         |
|------------|---------|-----------|------|------|---------|
| 1995 10 21 | 0 17    | ROXANNE   | 19.5 | 96.0 | 25 1011 |
| 1995 10 20 | 12 18   | SEBASTIEN | 13.8 | 53.8 | 25 1006 |
| 1995 10 20 | 18 18   | SEBASTIEN | 14.8 | 54.5 | 30 1005 |
| 1995 10 21 | 0 18    | SEBASTIEN | 16.0 | 55.1 | 35 1004 |
| 1995 10 21 | 6 18    | SEBASTIEN | 17.6 | 55.9 | 35 1004 |
| 1995 10 21 | 12 18   | SEBASTIEN | 19.0 | 56.3 | 40 1005 |
| 1995 10 21 | 18 18   | SEBASTIEN | 20.1 | 56.6 | 40 1007 |
| 1995 10 22 | 0 18    | SEBASTIEN | 21.2 | 56.7 | 40 1007 |
| 1995 10 22 | 6 18    | SEBASTIEN | 21.8 | 56.8 | 40 1006 |
| 1995 10 22 | 12 18   | SEBASTIEN | 22.0 | 57.7 | 45 1004 |
| 1995 10 22 | 18 18   | SEBASTIEN | 21.5 | 58.5 | 55 1001 |
| 1995 10 23 | 0 18    | SEBASTIEN | 20.9 | 59.5 | 50 1001 |
| 1995 10 23 | 6 18    | SEBASTIEN | 20.1 | 60.4 | 45 1002 |
| 1995 10 23 | 12 18   | SEBASTIEN | 19.4 | 61.0 | 40 1003 |
| 1995 10 23 | 18 18   | SEBASTIEN | 19.0 | 61.7 | 35 1004 |
| 1995 10 24 | 0 18    | SEBASTIEN | 18.6 | 62.3 | 30 1005 |
| 1995 10 24 | 6 18    | SEBASTIEN | 18.3 | 63.0 | 30 1007 |
| 1995 10 24 | 12 18   | SEBASTIEN | 18.0 | 63.7 | 30 1007 |
| 1995 10 24 | 18 18   | SEBASTIEN | 17.7 | 64.3 | 25 1007 |
| 1995 10 25 | 0 18    | SEBASTIEN | 17.5 | 64.5 | 20 1008 |
| 1995 10 27 | 0 19    | TANYA     | 24.6 | 59.2 | 30 1004 |
| 1995 10 27 | 6 19    | TANYA     | 25.3 | 58.6 | 30 1002 |
| 1995 10 27 | 12 19   | TANYA     | 26.2 | 57.9 | 35 1001 |
| 1995 10 27 | 18 19   | TANYA     | 27.1 | 57.1 | 40 998  |
| 1995 10 28 | 0 19    | TANYA     | 27.2 | 56.6 | 45 997  |
| 1995 10 28 | 6 19    | TANYA     | 27.3 | 56.2 | 45 996  |
| 1995 10 28 | 12 19   | TANYA     | 27.2 | 55.7 | 50 995  |
| 1995 10 28 | 18 19   | TANYA     | 27.5 | 54.7 | 55 992  |
| 1995 10 29 | 0 19    | TANYA     | 28.4 | 54.2 | 60 990  |
| 1995 10 29 | 6 19    | TANYA     | 29.6 | 54.2 | 60 987  |
| 1995 10 29 | 12 19   | TANYA     | 30.5 | 54.9 | 65 983  |
| 1995 10 29 | 18 19   | TANYA     | 31.2 | 55.3 | 70 982  |
| 1995 10 30 | 0 19    | TANYA     | 31.8 | 54.8 | 70 980  |
| 1995 10 30 | 6 19    | TANYA     | 32.6 | 54.2 | 70 980  |
| 1995 10 30 | 12 19   | TANYA     | 33.1 | 53.4 | 70 979  |
| 1995 10 30 | 18 19   | TANYA     | 33.8 | 51.8 | 75 977  |
| 1995 10 31 | 0 19    | TANYA     | 34.6 | 50.1 | 75 975  |
| 1995 10 31 | 6 19    | TANYA     | 35.4 | 48.3 | 75 972  |
| 1995 10 31 | 12 19   | TANYA     | 36.2 | 45.8 | 75 973  |
| 1995 10 31 | 18 19   | TANYA     | 37.1 | 43.2 | 75 973  |
| 1995 11    | 1 0 19  | TANYA     | 37.8 | 40.4 | 70 974  |
| 1995 11    | 1 6 19  | TANYA     | 37.7 | 37.9 | 65 974  |
| 1995 11    | 1 12 19 | TANYA     | 37.4 | 35.4 | 60 974  |
| 1995 11    | 1 18 19 | TANYA     | 37.7 | 31.8 | 55 972  |

|                       |      |      |    |      |
|-----------------------|------|------|----|------|
| 1995 11 2 0 19 TANYA  | 39.2 | 28.2 | 55 | 970  |
| 1995 11 2 6 19 TANYA  | 41.8 | 25.7 | 55 | 971  |
| 1995 11 2 12 19 TANYA | 44.5 | 24.0 | 50 | 974  |
| 1995 11 2 18 19 TANYA | 47.5 | 23.0 | 45 | 976  |
| 1995 11 3 0 19 TANYA  | 50.5 | 24.0 | 40 | 977  |
| 1996 6 17 18 1 ARTHUR | 26.8 | 77.8 | 25 | 1010 |
| 1996 6 18 0 1 ARTHUR  | 27.7 | 78.3 | 25 | 1010 |
| 1996 6 18 6 1 ARTHUR  | 28.6 | 78.8 | 25 | 1009 |
| 1996 6 18 12 1 ARTHUR | 29.7 | 78.8 | 25 | 1008 |
| 1996 6 18 18 1 ARTHUR | 30.6 | 78.7 | 30 | 1008 |
| 1996 6 19 0 1 ARTHUR  | 31.5 | 78.7 | 35 | 1004 |
| 1996 6 19 6 1 ARTHUR  | 32.3 | 78.6 | 35 | 1006 |
| 1996 6 19 12 1 ARTHUR | 33.2 | 78.1 | 40 | 1005 |
| 1996 6 19 18 1 ARTHUR | 33.9 | 77.3 | 40 | 1005 |
| 1996 6 20 0 1 ARTHUR  | 34.7 | 76.4 | 35 | 1005 |
| 1996 6 20 6 1 ARTHUR  | 35.5 | 75.4 | 35 | 1005 |
| 1996 6 20 12 1 ARTHUR | 36.4 | 74.1 | 30 | 1005 |
| 1996 6 20 18 1 ARTHUR | 36.9 | 72.5 | 30 | 1004 |
| 1996 6 21 0 1 ARTHUR  | 37.3 | 70.3 | 30 | 1003 |
| 1996 6 21 6 1 ARTHUR  | 37.3 | 66.5 | 30 | 1002 |
| 1996 6 21 12 1 ARTHUR | 37.5 | 62.0 | 35 | 1001 |
| 1996 6 21 18 1 ARTHUR | 37.8 | 56.2 | 45 | 1000 |
| 1996 6 22 0 1 ARTHUR  | 38.5 | 50.5 | 45 | 998  |
| 1996 6 22 6 1 ARTHUR  | 40.0 | 47.0 | 45 | 995  |
| 1996 6 22 12 1 ARTHUR | 41.0 | 43.0 | 45 | 993  |
| 1996 6 22 18 1 ARTHUR | 42.5 | 40.0 | 45 | 992  |
| 1996 6 23 0 1 ARTHUR  | 44.0 | 37.0 | 45 | 996  |
| 1996 7 5 0 2 BERTHA   | 9.8  | 34.0 | 30 | 1009 |
| 1996 7 5 6 2 BERTHA   | 10.2 | 36.3 | 30 | 1008 |
| 1996 7 5 12 2 BERTHA  | 11.0 | 39.0 | 35 | 1007 |
| 1996 7 5 18 2 BERTHA  | 12.0 | 41.2 | 35 | 1006 |
| 1996 7 6 0 2 BERTHA   | 12.7 | 43.9 | 35 | 1005 |
| 1996 7 6 6 2 BERTHA   | 13.1 | 46.6 | 35 | 1004 |
| 1996 7 6 12 2 BERTHA  | 13.7 | 48.7 | 40 | 1002 |
| 1996 7 6 18 2 BERTHA  | 14.2 | 51.0 | 45 | 1000 |
| 1996 7 7 0 2 BERTHA   | 14.9 | 52.9 | 50 | 999  |
| 1996 7 7 6 2 BERTHA   | 15.6 | 54.8 | 55 | 997  |
| 1996 7 7 12 2 BERTHA  | 16.4 | 56.9 | 60 | 995  |
| 1996 7 7 18 2 BERTHA  | 16.5 | 58.4 | 70 | 992  |
| 1996 7 8 0 2 BERTHA   | 17.0 | 60.1 | 75 | 988  |
| 1996 7 8 6 2 BERTHA   | 17.5 | 61.8 | 75 | 985  |
| 1996 7 8 12 2 BERTHA  | 18.0 | 63.5 | 70 | 983  |
| 1996 7 8 18 2 BERTHA  | 18.6 | 64.9 | 75 | 978  |
| 1996 7 9 0 2 BERTHA   | 19.4 | 66.1 | 80 | 970  |

|      |   |    |    |   |        |      |      |     |      |
|------|---|----|----|---|--------|------|------|-----|------|
| 1996 | 7 | 9  | 6  | 2 | BERTHA | 20.3 | 67.7 | 100 | 960  |
| 1996 | 7 | 9  | 12 | 2 | BERTHA | 21.4 | 69.4 | 100 | 965  |
| 1996 | 7 | 9  | 18 | 2 | BERTHA | 22.5 | 71.1 | 90  | 967  |
| 1996 | 7 | 10 | 0  | 2 | BERTHA | 23.6 | 72.6 | 85  | 969  |
| 1996 | 7 | 10 | 6  | 2 | BERTHA | 24.5 | 74.0 | 80  | 971  |
| 1996 | 7 | 10 | 12 | 2 | BERTHA | 25.4 | 75.3 | 80  | 968  |
| 1996 | 7 | 10 | 18 | 2 | BERTHA | 26.4 | 75.8 | 80  | 966  |
| 1996 | 7 | 11 | 0  | 2 | BERTHA | 27.5 | 76.4 | 75  | 968  |
| 1996 | 7 | 11 | 6  | 2 | BERTHA | 28.3 | 76.8 | 75  | 972  |
| 1996 | 7 | 11 | 12 | 2 | BERTHA | 29.2 | 77.5 | 75  | 977  |
| 1996 | 7 | 11 | 18 | 2 | BERTHA | 30.0 | 78.0 | 70  | 980  |
| 1996 | 7 | 12 | 0  | 2 | BERTHA | 30.7 | 78.3 | 70  | 982  |
| 1996 | 7 | 12 | 6  | 2 | BERTHA | 31.2 | 78.6 | 70  | 984  |
| 1996 | 7 | 12 | 12 | 2 | BERTHA | 32.2 | 78.4 | 85  | 975  |
| 1996 | 7 | 12 | 18 | 2 | BERTHA | 33.6 | 78.1 | 90  | 974  |
| 1996 | 7 | 13 | 0  | 2 | BERTHA | 35.0 | 77.6 | 65  | 993  |
| 1996 | 7 | 13 | 6  | 2 | BERTHA | 36.7 | 77.0 | 60  | 993  |
| 1996 | 7 | 13 | 12 | 2 | BERTHA | 38.3 | 76.1 | 60  | 994  |
| 1996 | 7 | 13 | 18 | 2 | BERTHA | 40.2 | 74.5 | 60  | 994  |
| 1996 | 7 | 14 | 0  | 2 | BERTHA | 42.1 | 71.9 | 60  | 994  |
| 1996 | 7 | 14 | 6  | 2 | BERTHA | 44.1 | 69.0 | 55  | 995  |
| 1996 | 7 | 14 | 12 | 2 | BERTHA | 46.0 | 66.0 | 50  | 995  |
| 1996 | 7 | 14 | 18 | 2 | BERTHA | 47.0 | 62.0 | 50  | 995  |
| 1996 | 7 | 15 | 0  | 2 | BERTHA | 48.0 | 57.0 | 50  | 995  |
| 1996 | 7 | 15 | 6  | 2 | BERTHA | 49.0 | 52.0 | 45  | 996  |
| 1996 | 7 | 15 | 12 | 2 | BERTHA | 51.0 | 47.0 | 40  | 996  |
| 1996 | 7 | 15 | 18 | 2 | BERTHA | 54.0 | 44.0 | 40  | 996  |
| 1996 | 7 | 16 | 0  | 2 | BERTHA | 57.5 | 42.5 | 40  | 991  |
| 1996 | 7 | 16 | 6  | 2 | BERTHA | 58.5 | 42.5 | 40  | 988  |
| 1996 | 7 | 16 | 12 | 2 | BERTHA | 59.5 | 42.0 | 45  | 988  |
| 1996 | 7 | 16 | 18 | 2 | BERTHA | 59.8 | 41.0 | 45  | 985  |
| 1996 | 7 | 17 | 0  | 2 | BERTHA | 60.0 | 40.0 | 40  | 993  |
| 1996 | 7 | 17 | 6  | 2 | BERTHA | 60.5 | 39.0 | 35  | 1001 |
| 1996 | 7 | 24 | 18 | 3 | CESAR  | 11.8 | 62.6 | 25  | 1009 |
| 1996 | 7 | 25 | 0  | 3 | CESAR  | 11.9 | 64.7 | 25  | 1009 |
| 1996 | 7 | 25 | 6  | 3 | CESAR  | 11.9 | 66.5 | 30  | 1007 |
| 1996 | 7 | 25 | 12 | 3 | CESAR  | 12.1 | 68.1 | 40  | 1004 |
| 1996 | 7 | 25 | 18 | 3 | CESAR  | 12.3 | 69.6 | 40  | 1002 |
| 1996 | 7 | 26 | 0  | 3 | CESAR  | 12.4 | 71.0 | 40  | 1002 |
| 1996 | 7 | 26 | 6  | 3 | CESAR  | 12.4 | 72.7 | 40  | 1002 |
| 1996 | 7 | 26 | 12 | 3 | CESAR  | 12.3 | 74.5 | 45  | 1002 |
| 1996 | 7 | 26 | 18 | 3 | CESAR  | 11.9 | 76.1 | 50  | 1002 |
| 1996 | 7 | 27 | 0  | 3 | CESAR  | 11.7 | 77.2 | 50  | 1000 |
| 1996 | 7 | 27 | 6  | 3 | CESAR  | 11.6 | 78.1 | 60  | 992  |

|      |         |           |      |       |    |      |
|------|---------|-----------|------|-------|----|------|
| 1996 | 7 27 12 | 3 CESAR   | 11.6 | 79.5  | 70 | 992  |
| 1996 | 7 27 18 | 3 CESAR   | 11.8 | 81.0  | 65 | 994  |
| 1996 | 7 28 0  | 3 CESAR   | 12.0 | 82.6  | 70 | 992  |
| 1996 | 7 28 6  | 3 CESAR   | 12.3 | 84.2  | 70 | 990  |
| 1996 | 7 28 12 | 3 CESAR   | 12.7 | 86.2  | 50 | 995  |
| 1996 | 7 28 18 | 3 CESAR   | 13.1 | 87.9  | 35 | 1004 |
| 1996 | 8 19 6  | 4 DOLLY   | 17.3 | 80.2  | 25 | 1009 |
| 1996 | 8 19 12 | 4 DOLLY   | 17.8 | 81.7  | 30 | 1008 |
| 1996 | 8 19 18 | 4 DOLLY   | 18.2 | 83.0  | 45 | 1006 |
| 1996 | 8 20 0  | 4 DOLLY   | 18.6 | 84.4  | 45 | 1006 |
| 1996 | 8 20 6  | 4 DOLLY   | 18.8 | 85.7  | 55 | 1005 |
| 1996 | 8 20 12 | 4 DOLLY   | 19.0 | 86.9  | 60 | 1002 |
| 1996 | 8 20 18 | 4 DOLLY   | 19.2 | 87.8  | 65 | 999  |
| 1996 | 8 21 0  | 4 DOLLY   | 19.2 | 88.7  | 40 | 1001 |
| 1996 | 8 21 6  | 4 DOLLY   | 19.3 | 89.5  | 35 | 1002 |
| 1996 | 8 21 12 | 4 DOLLY   | 19.4 | 90.1  | 30 | 1002 |
| 1996 | 8 21 18 | 4 DOLLY   | 19.5 | 90.7  | 30 | 1002 |
| 1996 | 8 22 0  | 4 DOLLY   | 19.7 | 91.4  | 35 | 1002 |
| 1996 | 8 22 6  | 4 DOLLY   | 20.1 | 92.6  | 45 | 1002 |
| 1996 | 8 22 12 | 4 DOLLY   | 20.4 | 93.7  | 45 | 999  |
| 1996 | 8 22 18 | 4 DOLLY   | 20.6 | 94.2  | 50 | 993  |
| 1996 | 8 23 0  | 4 DOLLY   | 20.9 | 94.9  | 55 | 990  |
| 1996 | 8 23 6  | 4 DOLLY   | 21.3 | 96.1  | 60 | 991  |
| 1996 | 8 23 12 | 4 DOLLY   | 21.6 | 97.7  | 70 | 989  |
| 1996 | 8 23 18 | 4 DOLLY   | 21.6 | 99.3  | 45 | 997  |
| 1996 | 8 24 0  | 4 DOLLY   | 21.6 | 100.9 | 30 | 1002 |
| 1996 | 8 24 6  | 4 DOLLY   | 21.6 | 102.5 | 25 | 1004 |
| 1996 | 8 24 12 | 4 DOLLY   | 21.7 | 104.0 | 20 | 1005 |
| 1996 | 8 24 18 | 4 DOLLY   | 21.7 | 105.7 | 20 | 1005 |
| 1996 | 8 25 0  | 4 DOLLY   | 21.8 | 107.3 | 20 | 1005 |
| 1996 | 8 19 18 | 5 EDOUARD | 12.4 | 19.9  | 25 | 1007 |
| 1996 | 8 20 0  | 5 EDOUARD | 12.4 | 20.7  | 25 | 1007 |
| 1996 | 8 20 6  | 5 EDOUARD | 12.4 | 21.6  | 25 | 1007 |
| 1996 | 8 20 12 | 5 EDOUARD | 12.5 | 22.6  | 25 | 1007 |
| 1996 | 8 20 18 | 5 EDOUARD | 12.6 | 23.8  | 25 | 1007 |
| 1996 | 8 21 0  | 5 EDOUARD | 12.6 | 25.3  | 25 | 1007 |
| 1996 | 8 21 6  | 5 EDOUARD | 12.8 | 26.7  | 25 | 1007 |
| 1996 | 8 21 12 | 5 EDOUARD | 12.9 | 27.9  | 25 | 1007 |
| 1996 | 8 21 18 | 5 EDOUARD | 13.0 | 29.2  | 25 | 1006 |
| 1996 | 8 22 0  | 5 EDOUARD | 13.1 | 30.3  | 30 | 1006 |
| 1996 | 8 22 6  | 5 EDOUARD | 13.2 | 31.6  | 35 | 1005 |
| 1996 | 8 22 12 | 5 EDOUARD | 13.4 | 32.9  | 40 | 1003 |
| 1996 | 8 22 18 | 5 EDOUARD | 13.5 | 34.4  | 40 | 1002 |
| 1996 | 8 23 0  | 5 EDOUARD | 13.7 | 35.8  | 45 | 1000 |

|      |      |    |   |         |      |      |     |     |
|------|------|----|---|---------|------|------|-----|-----|
| 1996 | 8 23 | 6  | 5 | EDOUARD | 13.8 | 37.0 | 50  | 996 |
| 1996 | 8 23 | 12 | 5 | EDOUARD | 13.9 | 38.3 | 65  | 988 |
| 1996 | 8 23 | 18 | 5 | EDOUARD | 14.0 | 39.8 | 65  | 986 |
| 1996 | 8 24 | 0  | 5 | EDOUARD | 14.1 | 41.1 | 70  | 983 |
| 1996 | 8 24 | 6  | 5 | EDOUARD | 14.1 | 42.4 | 75  | 980 |
| 1996 | 8 24 | 12 | 5 | EDOUARD | 14.4 | 43.6 | 90  | 970 |
| 1996 | 8 24 | 18 | 5 | EDOUARD | 14.6 | 44.7 | 100 | 960 |
| 1996 | 8 25 | 0  | 5 | EDOUARD | 15.0 | 45.8 | 120 | 942 |
| 1996 | 8 25 | 6  | 5 | EDOUARD | 15.4 | 47.0 | 125 | 933 |
| 1996 | 8 25 | 12 | 5 | EDOUARD | 15.9 | 48.3 | 125 | 934 |
| 1996 | 8 25 | 18 | 5 | EDOUARD | 16.5 | 49.6 | 125 | 935 |
| 1996 | 8 26 | 0  | 5 | EDOUARD | 17.0 | 50.9 | 125 | 936 |
| 1996 | 8 26 | 6  | 5 | EDOUARD | 17.5 | 52.0 | 125 | 936 |
| 1996 | 8 26 | 12 | 5 | EDOUARD | 17.9 | 53.2 | 125 | 937 |
| 1996 | 8 26 | 18 | 5 | EDOUARD | 18.4 | 54.5 | 125 | 938 |
| 1996 | 8 27 | 0  | 5 | EDOUARD | 18.9 | 55.6 | 125 | 942 |
| 1996 | 8 27 | 6  | 5 | EDOUARD | 19.5 | 56.9 | 120 | 948 |
| 1996 | 8 27 | 12 | 5 | EDOUARD | 20.0 | 58.1 | 115 | 952 |
| 1996 | 8 27 | 18 | 5 | EDOUARD | 20.4 | 59.3 | 115 | 951 |
| 1996 | 8 28 | 0  | 5 | EDOUARD | 20.9 | 60.4 | 125 | 944 |
| 1996 | 8 28 | 6  | 5 | EDOUARD | 21.3 | 61.7 | 115 | 952 |
| 1996 | 8 28 | 12 | 5 | EDOUARD | 21.9 | 63.2 | 110 | 960 |
| 1996 | 8 28 | 18 | 5 | EDOUARD | 22.3 | 64.6 | 110 | 956 |
| 1996 | 8 29 | 0  | 5 | EDOUARD | 22.9 | 65.9 | 110 | 957 |
| 1996 | 8 29 | 6  | 5 | EDOUARD | 23.4 | 67.1 | 110 | 961 |
| 1996 | 8 29 | 12 | 5 | EDOUARD | 24.0 | 68.1 | 115 | 950 |
| 1996 | 8 29 | 18 | 5 | EDOUARD | 24.7 | 69.0 | 120 | 948 |
| 1996 | 8 30 | 0  | 5 | EDOUARD | 25.5 | 69.5 | 120 | 941 |
| 1996 | 8 30 | 6  | 5 | EDOUARD | 26.4 | 69.9 | 120 | 939 |
| 1996 | 8 30 | 12 | 5 | EDOUARD | 27.4 | 70.2 | 120 | 938 |
| 1996 | 8 30 | 18 | 5 | EDOUARD | 28.5 | 70.5 | 120 | 934 |
| 1996 | 8 31 | 0  | 5 | EDOUARD | 29.5 | 70.5 | 110 | 944 |
| 1996 | 8 31 | 6  | 5 | EDOUARD | 30.4 | 70.6 | 105 | 950 |
| 1996 | 8 31 | 12 | 5 | EDOUARD | 31.6 | 70.3 | 105 | 952 |
| 1996 | 8 31 | 18 | 5 | EDOUARD | 32.7 | 70.1 | 100 | 953 |
| 1996 | 9 1  | 0  | 5 | EDOUARD | 34.0 | 70.1 | 100 | 959 |
| 1996 | 9 1  | 6  | 5 | EDOUARD | 35.2 | 70.1 | 100 | 958 |
| 1996 | 9 1  | 12 | 5 | EDOUARD | 36.5 | 70.2 | 95  | 958 |
| 1996 | 9 1  | 18 | 5 | EDOUARD | 37.5 | 70.0 | 85  | 960 |
| 1996 | 9 2  | 0  | 5 | EDOUARD | 38.7 | 69.5 | 80  | 964 |
| 1996 | 9 2  | 6  | 5 | EDOUARD | 39.8 | 69.4 | 70  | 961 |
| 1996 | 9 2  | 12 | 5 | EDOUARD | 40.5 | 68.3 | 70  | 962 |
| 1996 | 9 2  | 18 | 5 | EDOUARD | 41.3 | 67.3 | 65  | 972 |
| 1996 | 9 3  | 0  | 5 | EDOUARD | 42.0 | 66.8 | 60  | 978 |



|      |   |    |    |   |         |      |      |    |      |
|------|---|----|----|---|---------|------|------|----|------|
| 1996 | 9 | 3  | 6  | 5 | EDOUARD | 42.2 | 66.0 | 55 | 985  |
| 1996 | 9 | 3  | 12 | 5 | EDOUARD | 42.5 | 65.0 | 50 | 992  |
| 1996 | 9 | 3  | 18 | 5 | EDOUARD | 42.7 | 63.0 | 50 | 995  |
| 1996 | 9 | 4  | 0  | 5 | EDOUARD | 43.2 | 59.8 | 50 | 997  |
| 1996 | 9 | 4  | 6  | 5 | EDOUARD | 43.3 | 57.5 | 50 | 994  |
| 1996 | 9 | 4  | 12 | 5 | EDOUARD | 43.4 | 55.5 | 50 | 994  |
| 1996 | 9 | 4  | 18 | 5 | EDOUARD | 43.5 | 53.5 | 50 | 995  |
| 1996 | 9 | 5  | 0  | 5 | EDOUARD | 43.5 | 51.5 | 50 | 995  |
| 1996 | 9 | 5  | 6  | 5 | EDOUARD | 43.5 | 50.0 | 45 | 994  |
| 1996 | 9 | 5  | 12 | 5 | EDOUARD | 43.5 | 48.5 | 45 | 994  |
| 1996 | 9 | 5  | 18 | 5 | EDOUARD | 43.7 | 47.5 | 45 | 995  |
| 1996 | 9 | 6  | 0  | 5 | EDOUARD | 44.5 | 46.0 | 40 | 995  |
| 1996 | 9 | 6  | 6  | 5 | EDOUARD | 46.0 | 44.0 | 40 | 994  |
| 1996 | 9 | 6  | 12 | 5 | EDOUARD | 48.0 | 43.0 | 40 | 992  |
| 1996 | 9 | 6  | 18 | 5 | EDOUARD | 50.0 | 41.0 | 40 | 990  |
| 1996 | 8 | 23 | 12 | 6 | FRAN    | 14.0 | 21.0 | 25 | 1012 |
| 1996 | 8 | 23 | 18 | 6 | FRAN    | 14.1 | 22.8 | 25 | 1011 |
| 1996 | 8 | 24 | 0  | 6 | FRAN    | 14.2 | 24.8 | 25 | 1010 |
| 1996 | 8 | 24 | 6  | 6 | FRAN    | 14.2 | 26.6 | 30 | 1009 |
| 1996 | 8 | 24 | 12 | 6 | FRAN    | 14.1 | 28.2 | 30 | 1009 |
| 1996 | 8 | 24 | 18 | 6 | FRAN    | 14.1 | 29.6 | 30 | 1009 |
| 1996 | 8 | 25 | 0  | 6 | FRAN    | 14.1 | 30.8 | 25 | 1009 |
| 1996 | 8 | 25 | 6  | 6 | FRAN    | 14.3 | 32.0 | 25 | 1009 |
| 1996 | 8 | 25 | 12 | 6 | FRAN    | 14.6 | 33.4 | 25 | 1009 |
| 1996 | 8 | 25 | 18 | 6 | FRAN    | 14.7 | 35.1 | 25 | 1009 |
| 1996 | 8 | 26 | 0  | 6 | FRAN    | 14.9 | 37.0 | 25 | 1009 |
| 1996 | 8 | 26 | 6  | 6 | FRAN    | 15.1 | 38.6 | 25 | 1009 |
| 1996 | 8 | 26 | 12 | 6 | FRAN    | 15.3 | 40.0 | 30 | 1009 |
| 1996 | 8 | 26 | 18 | 6 | FRAN    | 15.2 | 41.4 | 30 | 1008 |
| 1996 | 8 | 27 | 0  | 6 | FRAN    | 14.9 | 42.7 | 30 | 1007 |
| 1996 | 8 | 27 | 6  | 6 | FRAN    | 14.7 | 43.8 | 30 | 1006 |
| 1996 | 8 | 27 | 12 | 6 | FRAN    | 14.6 | 44.9 | 35 | 1005 |
| 1996 | 8 | 27 | 18 | 6 | FRAN    | 14.6 | 46.1 | 40 | 1004 |
| 1996 | 8 | 28 | 0  | 6 | FRAN    | 14.6 | 47.5 | 45 | 1002 |
| 1996 | 8 | 28 | 6  | 6 | FRAN    | 15.0 | 49.1 | 50 | 1000 |
| 1996 | 8 | 28 | 12 | 6 | FRAN    | 15.5 | 50.7 | 55 | 995  |
| 1996 | 8 | 28 | 18 | 6 | FRAN    | 15.9 | 52.3 | 60 | 990  |
| 1996 | 8 | 29 | 0  | 6 | FRAN    | 16.4 | 53.7 | 65 | 987  |
| 1996 | 8 | 29 | 6  | 6 | FRAN    | 17.0 | 55.0 | 65 | 987  |
| 1996 | 8 | 29 | 12 | 6 | FRAN    | 17.8 | 56.3 | 65 | 988  |
| 1996 | 8 | 29 | 18 | 6 | FRAN    | 18.6 | 57.5 | 65 | 988  |
| 1996 | 8 | 30 | 0  | 6 | FRAN    | 19.1 | 58.5 | 65 | 991  |
| 1996 | 8 | 30 | 6  | 6 | FRAN    | 19.4 | 59.4 | 65 | 991  |
| 1996 | 8 | 30 | 12 | 6 | FRAN    | 19.8 | 60.1 | 65 | 989  |

|      |   |    |    |   |        |      |      |     |      |
|------|---|----|----|---|--------|------|------|-----|------|
| 1996 | 8 | 30 | 18 | 6 | FRAN   | 20.2 | 60.6 | 60  | 990  |
| 1996 | 8 | 31 | 0  | 6 | FRAN   | 20.5 | 60.9 | 60  | 988  |
| 1996 | 8 | 31 | 6  | 6 | FRAN   | 20.8 | 61.2 | 60  | 987  |
| 1996 | 8 | 31 | 12 | 6 | FRAN   | 21.1 | 61.4 | 65  | 984  |
| 1996 | 8 | 31 | 18 | 6 | FRAN   | 21.5 | 61.7 | 65  | 983  |
| 1996 | 9 | 1  | 0  | 6 | FRAN   | 21.7 | 62.1 | 65  | 978  |
| 1996 | 9 | 1  | 6  | 6 | FRAN   | 21.9 | 62.6 | 65  | 982  |
| 1996 | 9 | 1  | 12 | 6 | FRAN   | 22.2 | 63.2 | 70  | 982  |
| 1996 | 9 | 1  | 18 | 6 | FRAN   | 22.5 | 63.9 | 75  | 981  |
| 1996 | 9 | 2  | 0  | 6 | FRAN   | 22.9 | 64.7 | 75  | 978  |
| 1996 | 9 | 2  | 6  | 6 | FRAN   | 23.3 | 65.7 | 75  | 976  |
| 1996 | 9 | 2  | 12 | 6 | FRAN   | 23.6 | 66.7 | 75  | 976  |
| 1996 | 9 | 2  | 18 | 6 | FRAN   | 23.9 | 67.9 | 75  | 976  |
| 1996 | 9 | 3  | 0  | 6 | FRAN   | 24.2 | 69.0 | 75  | 977  |
| 1996 | 9 | 3  | 6  | 6 | FRAN   | 24.4 | 70.1 | 80  | 975  |
| 1996 | 9 | 3  | 12 | 6 | FRAN   | 24.7 | 71.2 | 80  | 973  |
| 1996 | 9 | 3  | 18 | 6 | FRAN   | 25.2 | 72.2 | 85  | 968  |
| 1996 | 9 | 4  | 0  | 6 | FRAN   | 25.7 | 73.1 | 95  | 961  |
| 1996 | 9 | 4  | 6  | 6 | FRAN   | 26.4 | 73.9 | 100 | 953  |
| 1996 | 9 | 4  | 12 | 6 | FRAN   | 27.0 | 74.7 | 105 | 956  |
| 1996 | 9 | 4  | 18 | 6 | FRAN   | 27.7 | 75.5 | 105 | 952  |
| 1996 | 9 | 5  | 0  | 6 | FRAN   | 28.6 | 76.1 | 105 | 946  |
| 1996 | 9 | 5  | 6  | 6 | FRAN   | 29.8 | 76.7 | 105 | 952  |
| 1996 | 9 | 5  | 12 | 6 | FRAN   | 31.0 | 77.2 | 100 | 954  |
| 1996 | 9 | 5  | 18 | 6 | FRAN   | 32.3 | 77.8 | 100 | 952  |
| 1996 | 9 | 6  | 0  | 6 | FRAN   | 33.7 | 78.0 | 100 | 954  |
| 1996 | 9 | 6  | 6  | 6 | FRAN   | 35.2 | 78.7 | 65  | 970  |
| 1996 | 9 | 6  | 12 | 6 | FRAN   | 36.7 | 79.0 | 40  | 985  |
| 1996 | 9 | 6  | 18 | 6 | FRAN   | 38.0 | 79.4 | 30  | 995  |
| 1996 | 9 | 7  | 0  | 6 | FRAN   | 39.2 | 79.9 | 30  | 1000 |
| 1996 | 9 | 7  | 6  | 6 | FRAN   | 40.4 | 80.4 | 30  | 1001 |
| 1996 | 9 | 7  | 12 | 6 | FRAN   | 41.2 | 80.5 | 30  | 1001 |
| 1996 | 9 | 7  | 18 | 6 | FRAN   | 42.0 | 80.4 | 30  | 1000 |
| 1996 | 9 | 8  | 0  | 6 | FRAN   | 42.8 | 80.1 | 30  | 999  |
| 1996 | 9 | 8  | 6  | 6 | FRAN   | 43.4 | 79.9 | 30  | 999  |
| 1996 | 9 | 8  | 12 | 6 | FRAN   | 44.0 | 79.0 | 25  | 1000 |
| 1996 | 9 | 8  | 18 | 6 | FRAN   | 44.5 | 77.6 | 25  | 1001 |
| 1996 | 9 | 9  | 0  | 6 | FRAN   | 44.9 | 75.9 | 25  | 1002 |
| 1996 | 9 | 9  | 6  | 6 | FRAN   | 45.4 | 74.0 | 20  | 1004 |
| 1996 | 9 | 9  | 12 | 6 | FRAN   | 45.7 | 72.3 | 15  | 1006 |
| 1996 | 9 | 9  | 18 | 6 | FRAN   | 46.0 | 71.1 | 15  | 1008 |
| 1996 | 9 | 10 | 0  | 6 | FRAN   | 46.7 | 70.0 | 15  | 1010 |
| 1996 | 8 | 26 | 0  | 7 | GUSTAV | 12.7 | 23.0 | 30  | 1008 |
| 1996 | 8 | 26 | 6  | 7 | GUSTAV | 12.7 | 24.1 | 30  | 1008 |

|      |         |            |      |      |         |
|------|---------|------------|------|------|---------|
| 1996 | 8 26 12 | 7 GUSTAV   | 12.5 | 25.3 | 30 1008 |
| 1996 | 8 26 18 | 7 GUSTAV   | 12.3 | 26.6 | 30 1008 |
| 1996 | 8 27 0  | 7 GUSTAV   | 12.1 | 27.8 | 30 1008 |
| 1996 | 8 27 6  | 7 GUSTAV   | 11.7 | 28.8 | 30 1008 |
| 1996 | 8 27 12 | 7 GUSTAV   | 11.1 | 30.0 | 30 1007 |
| 1996 | 8 27 18 | 7 GUSTAV   | 10.6 | 31.0 | 30 1007 |
| 1996 | 8 28 0  | 7 GUSTAV   | 10.4 | 31.8 | 30 1006 |
| 1996 | 8 28 6  | 7 GUSTAV   | 10.6 | 32.7 | 35 1006 |
| 1996 | 8 28 12 | 7 GUSTAV   | 11.0 | 33.6 | 35 1005 |
| 1996 | 8 28 18 | 7 GUSTAV   | 11.8 | 34.4 | 35 1005 |
| 1996 | 8 29 0  | 7 GUSTAV   | 12.5 | 35.2 | 40 1005 |
| 1996 | 8 29 6  | 7 GUSTAV   | 13.1 | 36.2 | 40 1005 |
| 1996 | 8 29 12 | 7 GUSTAV   | 13.7 | 37.2 | 40 1005 |
| 1996 | 8 29 18 | 7 GUSTAV   | 14.4 | 38.0 | 40 1005 |
| 1996 | 8 30 0  | 7 GUSTAV   | 15.2 | 38.4 | 35 1005 |
| 1996 | 8 30 6  | 7 GUSTAV   | 15.8 | 38.9 | 35 1005 |
| 1996 | 8 30 12 | 7 GUSTAV   | 16.2 | 39.5 | 35 1006 |
| 1996 | 8 30 18 | 7 GUSTAV   | 16.6 | 40.4 | 35 1006 |
| 1996 | 8 31 0  | 7 GUSTAV   | 17.1 | 41.1 | 35 1007 |
| 1996 | 8 31 6  | 7 GUSTAV   | 17.7 | 41.8 | 35 1008 |
| 1996 | 8 31 12 | 7 GUSTAV   | 18.3 | 42.5 | 35 1008 |
| 1996 | 8 31 18 | 7 GUSTAV   | 18.7 | 43.2 | 35 1008 |
| 1996 | 9 1 0   | 7 GUSTAV   | 19.3 | 43.8 | 35 1008 |
| 1996 | 9 1 6   | 7 GUSTAV   | 19.9 | 44.5 | 35 1008 |
| 1996 | 9 1 12  | 7 GUSTAV   | 20.5 | 45.4 | 35 1008 |
| 1996 | 9 1 18  | 7 GUSTAV   | 20.9 | 46.5 | 30 1008 |
| 1996 | 9 2 0   | 7 GUSTAV   | 21.3 | 47.7 | 30 1008 |
| 1996 | 9 3 12  | 8 HORTENSE | 14.9 | 41.0 | 25 1006 |
| 1996 | 9 3 18  | 8 HORTENSE | 14.9 | 42.7 | 30 1006 |
| 1996 | 9 4 0   | 8 HORTENSE | 14.8 | 44.1 | 30 1006 |
| 1996 | 9 4 6   | 8 HORTENSE | 14.7 | 45.4 | 30 1006 |
| 1996 | 9 4 12  | 8 HORTENSE | 14.6 | 46.6 | 30 1006 |
| 1996 | 9 4 18  | 8 HORTENSE | 14.7 | 47.5 | 30 1006 |
| 1996 | 9 5 0   | 8 HORTENSE | 14.9 | 48.4 | 30 1006 |
| 1996 | 9 5 6   | 8 HORTENSE | 14.8 | 49.5 | 30 1006 |
| 1996 | 9 5 12  | 8 HORTENSE | 14.5 | 51.1 | 30 1006 |
| 1996 | 9 5 18  | 8 HORTENSE | 14.3 | 52.6 | 30 1006 |
| 1996 | 9 6 0   | 8 HORTENSE | 14.4 | 53.6 | 30 1006 |
| 1996 | 9 6 6   | 8 HORTENSE | 14.6 | 54.3 | 30 1006 |
| 1996 | 9 6 12  | 8 HORTENSE | 14.7 | 55.1 | 30 1006 |
| 1996 | 9 6 18  | 8 HORTENSE | 14.9 | 55.7 | 30 1006 |
| 1996 | 9 7 0   | 8 HORTENSE | 15.2 | 57.0 | 30 1006 |
| 1996 | 9 7 6   | 8 HORTENSE | 15.4 | 58.3 | 35 1005 |
| 1996 | 9 7 12  | 8 HORTENSE | 15.6 | 59.6 | 40 1004 |

|      |   |    |    |            |      |      |     |      |
|------|---|----|----|------------|------|------|-----|------|
| 1996 | 9 | 7  | 18 | 8 HORTENSE | 15.8 | 60.4 | 40  | 1000 |
| 1996 | 9 | 8  | 0  | 8 HORTENSE | 16.1 | 61.2 | 50  | 996  |
| 1996 | 9 | 8  | 6  | 8 HORTENSE | 16.1 | 62.0 | 55  | 996  |
| 1996 | 9 | 8  | 12 | 8 HORTENSE | 16.1 | 62.8 | 60  | 996  |
| 1996 | 9 | 8  | 18 | 8 HORTENSE | 16.1 | 63.6 | 60  | 991  |
| 1996 | 9 | 9  | 0  | 8 HORTENSE | 16.1 | 64.1 | 60  | 990  |
| 1996 | 9 | 9  | 6  | 8 HORTENSE | 16.1 | 64.5 | 70  | 987  |
| 1996 | 9 | 9  | 12 | 8 HORTENSE | 16.3 | 65.0 | 70  | 985  |
| 1996 | 9 | 9  | 18 | 8 HORTENSE | 16.6 | 65.6 | 70  | 990  |
| 1996 | 9 | 10 | 0  | 8 HORTENSE | 17.1 | 66.1 | 70  | 989  |
| 1996 | 9 | 10 | 6  | 8 HORTENSE | 18.0 | 66.9 | 70  | 989  |
| 1996 | 9 | 10 | 12 | 8 HORTENSE | 18.3 | 67.8 | 65  | 989  |
| 1996 | 9 | 10 | 18 | 8 HORTENSE | 18.9 | 68.4 | 65  | 990  |
| 1996 | 9 | 11 | 0  | 8 HORTENSE | 19.5 | 68.9 | 70  | 982  |
| 1996 | 9 | 11 | 6  | 8 HORTENSE | 20.1 | 69.5 | 75  | 975  |
| 1996 | 9 | 11 | 12 | 8 HORTENSE | 20.9 | 70.1 | 90  | 971  |
| 1996 | 9 | 11 | 18 | 8 HORTENSE | 21.6 | 70.6 | 95  | 970  |
| 1996 | 9 | 12 | 0  | 8 HORTENSE | 22.3 | 71.1 | 100 | 967  |
| 1996 | 9 | 12 | 6  | 8 HORTENSE | 23.0 | 71.4 | 105 | 962  |
| 1996 | 9 | 12 | 12 | 8 HORTENSE | 23.9 | 71.8 | 115 | 959  |
| 1996 | 9 | 12 | 18 | 8 HORTENSE | 24.7 | 71.8 | 115 | 946  |
| 1996 | 9 | 13 | 0  | 8 HORTENSE | 25.9 | 71.5 | 120 | 935  |
| 1996 | 9 | 13 | 6  | 8 HORTENSE | 27.2 | 71.4 | 115 | 942  |
| 1996 | 9 | 13 | 12 | 8 HORTENSE | 29.0 | 70.9 | 100 | 948  |
| 1996 | 9 | 13 | 18 | 8 HORTENSE | 31.0 | 70.3 | 100 | 948  |
| 1996 | 9 | 14 | 0  | 8 HORTENSE | 33.3 | 69.5 | 90  | 948  |
| 1996 | 9 | 14 | 6  | 8 HORTENSE | 35.9 | 68.4 | 90  | 955  |
| 1996 | 9 | 14 | 12 | 8 HORTENSE | 38.5 | 67.1 | 85  | 960  |
| 1996 | 9 | 14 | 18 | 8 HORTENSE | 42.0 | 65.2 | 75  | 960  |
| 1996 | 9 | 15 | 0  | 8 HORTENSE | 44.3 | 63.3 | 70  | 970  |
| 1996 | 9 | 15 | 6  | 8 HORTENSE | 45.5 | 61.5 | 65  | 980  |
| 1996 | 9 | 15 | 12 | 8 HORTENSE | 46.3 | 59.1 | 60  | 982  |
| 1996 | 9 | 15 | 18 | 8 HORTENSE | 46.0 | 55.0 | 40  | 996  |
| 1996 | 9 | 16 | 0  | 8 HORTENSE | 46.0 | 54.0 | 40  | 998  |
| 1996 | 9 | 16 | 6  | 8 HORTENSE | 45.0 | 50.0 | 35  | 999  |
| 1996 | 9 | 24 | 12 | 9 ISIDORE  | 8.6  | 23.3 | 25  | 1008 |
| 1996 | 9 | 24 | 18 | 9 ISIDORE  | 9.2  | 25.2 | 30  | 1008 |
| 1996 | 9 | 25 | 0  | 9 ISIDORE  | 9.9  | 26.9 | 30  | 1006 |
| 1996 | 9 | 25 | 6  | 9 ISIDORE  | 10.3 | 28.5 | 35  | 1004 |
| 1996 | 9 | 25 | 12 | 9 ISIDORE  | 10.7 | 30.0 | 45  | 1000 |
| 1996 | 9 | 25 | 18 | 9 ISIDORE  | 11.0 | 31.7 | 50  | 994  |
| 1996 | 9 | 26 | 0  | 9 ISIDORE  | 11.2 | 32.8 | 60  | 988  |
| 1996 | 9 | 26 | 6  | 9 ISIDORE  | 11.7 | 34.2 | 70  | 984  |
| 1996 | 9 | 26 | 12 | 9 ISIDORE  | 12.4 | 35.8 | 70  | 980  |

|      |    |    |    |    |           |      |      |     |      |
|------|----|----|----|----|-----------|------|------|-----|------|
| 1996 | 9  | 26 | 18 | 9  | ISIDORE   | 12.8 | 37.1 | 75  | 977  |
| 1996 | 9  | 27 | 0  | 9  | ISIDORE   | 13.1 | 38.6 | 80  | 974  |
| 1996 | 9  | 27 | 6  | 9  | ISIDORE   | 13.7 | 39.8 | 85  | 972  |
| 1996 | 9  | 27 | 12 | 9  | ISIDORE   | 14.1 | 41.1 | 90  | 968  |
| 1996 | 9  | 27 | 18 | 9  | ISIDORE   | 14.9 | 42.2 | 95  | 963  |
| 1996 | 9  | 28 | 0  | 9  | ISIDORE   | 15.8 | 42.9 | 100 | 960  |
| 1996 | 9  | 28 | 6  | 9  | ISIDORE   | 16.7 | 43.1 | 100 | 961  |
| 1996 | 9  | 28 | 12 | 9  | ISIDORE   | 17.8 | 43.2 | 95  | 965  |
| 1996 | 9  | 28 | 18 | 9  | ISIDORE   | 19.0 | 43.2 | 90  | 968  |
| 1996 | 9  | 29 | 0  | 9  | ISIDORE   | 20.0 | 42.9 | 85  | 973  |
| 1996 | 9  | 29 | 6  | 9  | ISIDORE   | 20.8 | 42.2 | 75  | 979  |
| 1996 | 9  | 29 | 12 | 9  | ISIDORE   | 21.8 | 41.3 | 70  | 982  |
| 1996 | 9  | 29 | 18 | 9  | ISIDORE   | 22.6 | 40.9 | 65  | 986  |
| 1996 | 9  | 30 | 0  | 9  | ISIDORE   | 23.8 | 40.4 | 60  | 989  |
| 1996 | 9  | 30 | 6  | 9  | ISIDORE   | 25.3 | 40.1 | 60  | 992  |
| 1996 | 9  | 30 | 12 | 9  | ISIDORE   | 26.7 | 40.0 | 50  | 995  |
| 1996 | 9  | 30 | 18 | 9  | ISIDORE   | 28.2 | 40.1 | 45  | 997  |
| 1996 | 10 | 1  | 0  | 9  | ISIDORE   | 29.9 | 40.3 | 35  | 1000 |
| 1996 | 10 | 1  | 6  | 9  | ISIDORE   | 31.6 | 40.4 | 35  | 1002 |
| 1996 | 10 | 1  | 12 | 9  | ISIDORE   | 33.6 | 40.4 | 30  | 1005 |
| 1996 | 10 | 1  | 18 | 9  | ISIDORE   | 35.8 | 40.3 | 30  | 1008 |
| 1996 | 10 | 2  | 0  | 9  | ISIDORE   | 38.1 | 40.2 | 25  | 1010 |
| 1996 | 10 | 2  | 6  | 9  | ISIDORE   | 40.3 | 39.6 | 20  | 1013 |
| 1996 | 10 | 2  | 12 | 9  | ISIDORE   | 43.0 | 36.0 | 20  | 1015 |
| 1996 | 10 | 4  | 18 | 10 | JOSEPHINE | 22.7 | 96.2 | 25  | 1003 |
| 1996 | 10 | 5  | 0  | 10 | JOSEPHINE | 23.0 | 96.1 | 30  | 1003 |
| 1996 | 10 | 5  | 6  | 10 | JOSEPHINE | 23.3 | 96.0 | 30  | 1003 |
| 1996 | 10 | 5  | 12 | 10 | JOSEPHINE | 23.6 | 95.8 | 30  | 1003 |
| 1996 | 10 | 5  | 18 | 10 | JOSEPHINE | 24.3 | 95.5 | 30  | 1003 |
| 1996 | 10 | 6  | 0  | 10 | JOSEPHINE | 24.8 | 95.0 | 30  | 1002 |
| 1996 | 10 | 6  | 6  | 10 | JOSEPHINE | 25.0 | 94.5 | 30  | 1002 |
| 1996 | 10 | 6  | 12 | 10 | JOSEPHINE | 25.1 | 93.5 | 30  | 1003 |
| 1996 | 10 | 6  | 18 | 10 | JOSEPHINE | 25.1 | 91.8 | 35  | 1001 |
| 1996 | 10 | 7  | 0  | 10 | JOSEPHINE | 25.5 | 90.4 | 40  | 996  |
| 1996 | 10 | 7  | 6  | 10 | JOSEPHINE | 25.9 | 88.9 | 50  | 992  |
| 1996 | 10 | 7  | 12 | 10 | JOSEPHINE | 26.9 | 87.3 | 60  | 981  |
| 1996 | 10 | 7  | 18 | 10 | JOSEPHINE | 28.2 | 86.0 | 60  | 983  |
| 1996 | 10 | 8  | 0  | 10 | JOSEPHINE | 29.3 | 84.5 | 60  | 983  |
| 1996 | 10 | 8  | 6  | 10 | JOSEPHINE | 30.9 | 82.3 | 45  | 990  |
| 1996 | 10 | 8  | 12 | 10 | JOSEPHINE | 34.0 | 79.0 | 45  | 988  |
| 1996 | 10 | 8  | 18 | 10 | JOSEPHINE | 36.0 | 76.0 | 45  | 986  |
| 1996 | 10 | 9  | 0  | 10 | JOSEPHINE | 38.0 | 73.5 | 45  | 983  |
| 1996 | 10 | 9  | 6  | 10 | JOSEPHINE | 41.0 | 71.0 | 45  | 980  |
| 1996 | 10 | 9  | 12 | 10 | JOSEPHINE | 42.5 | 68.0 | 45  | 980  |

|                  |           |      |      |    |      |
|------------------|-----------|------|------|----|------|
| 1996 10 9 18 10  | JOSEPHINE | 44.5 | 65.5 | 45 | 984  |
| 1996 10 10 0 10  | JOSEPHINE | 46.5 | 62.5 | 45 | 985  |
| 1996 10 10 6 10  | JOSEPHINE | 48.5 | 58.0 | 45 | 985  |
| 1996 10 10 12 10 | JOSEPHINE | 49.5 | 55.0 | 45 | 983  |
| 1996 10 10 18 10 | JOSEPHINE | 50.5 | 50.0 | 45 | 984  |
| 1996 10 11 0 10  | JOSEPHINE | 51.0 | 44.0 | 45 | 984  |
| 1996 10 11 6 10  | JOSEPHINE | 51.0 | 38.0 | 45 | 986  |
| 1996 10 11 12 10 | JOSEPHINE | 51.0 | 32.0 | 45 | 988  |
| 1996 10 11 18 10 | JOSEPHINE | 51.0 | 26.0 | 45 | 989  |
| 1996 10 12 0 10  | JOSEPHINE | 51.0 | 21.0 | 45 | 985  |
| 1996 10 12 6 10  | JOSEPHINE | 51.0 | 18.0 | 45 | 980  |
| 1996 10 12 12 10 | JOSEPHINE | 51.5 | 16.5 | 45 | 982  |
| 1996 10 12 18 10 | JOSEPHINE | 52.5 | 15.5 | 50 | 977  |
| 1996 10 13 0 10  | JOSEPHINE | 53.0 | 15.5 | 55 | 973  |
| 1996 10 13 6 10  | JOSEPHINE | 53.5 | 15.5 | 60 | 971  |
| 1996 10 13 12 10 | JOSEPHINE | 54.0 | 15.5 | 55 | 972  |
| 1996 10 13 18 10 | JOSEPHINE | 55.5 | 15.5 | 50 | 977  |
| 1996 10 14 0 10  | JOSEPHINE | 57.5 | 16.0 | 45 | 982  |
| 1996 10 14 6 10  | JOSEPHINE | 60.0 | 18.0 | 45 | 977  |
| 1996 10 14 12 10 | JOSEPHINE | 61.0 | 20.0 | 45 | 972  |
| 1996 10 14 18 10 | JOSEPHINE | 62.0 | 22.0 | 45 | 970  |
| 1996 10 15 0 10  | JOSEPHINE | 62.5 | 24.0 | 45 | 972  |
| 1996 10 15 6 10  | JOSEPHINE | 63.0 | 26.0 | 45 | 978  |
| 1996 10 15 12 10 | JOSEPHINE | 63.0 | 28.0 | 40 | 983  |
| 1996 10 15 18 10 | JOSEPHINE | 63.0 | 29.5 | 35 | 988  |
| 1996 10 16 0 10  | JOSEPHINE | 63.0 | 30.5 | 30 | 992  |
| 1996 10 11 12 11 | KYLE      | 17.3 | 86.5 | 30 | 1006 |
| 1996 10 11 18 11 | KYLE      | 16.9 | 87.1 | 45 | 1002 |
| 1996 10 12 0 11  | KYLE      | 16.6 | 87.5 | 45 | 1001 |
| 1996 10 12 6 11  | KYLE      | 16.3 | 87.8 | 35 | 1004 |
| 1996 10 12 12 11 | KYLE      | 16.0 | 88.1 | 30 | 1008 |
| 1996 10 12 18 11 | KYLE      | 15.7 | 88.4 | 25 | 1012 |
| 1996 10 14 12 12 | LILI      | 12.8 | 80.4 | 25 | 1006 |
| 1996 10 14 18 12 | LILI      | 13.4 | 80.9 | 25 | 1005 |
| 1996 10 15 0 12  | LILI      | 14.1 | 81.4 | 25 | 1005 |
| 1996 10 15 6 12  | LILI      | 14.8 | 81.9 | 25 | 1005 |
| 1996 10 15 12 12 | LILI      | 15.4 | 82.5 | 30 | 1004 |
| 1996 10 15 18 12 | LILI      | 16.1 | 83.1 | 30 | 1003 |
| 1996 10 16 0 12  | LILI      | 16.8 | 83.5 | 30 | 999  |
| 1996 10 16 6 12  | LILI      | 17.5 | 83.8 | 35 | 998  |
| 1996 10 16 12 12 | LILI      | 18.2 | 83.8 | 45 | 998  |
| 1996 10 16 18 12 | LILI      | 18.3 | 84.5 | 50 | 996  |
| 1996 10 17 0 12  | LILI      | 18.2 | 84.2 | 55 | 992  |
| 1996 10 17 6 12  | LILI      | 18.8 | 83.7 | 60 | 990  |

|                       |      |      |     |     |
|-----------------------|------|------|-----|-----|
| 1996 10 17 12 12 LILI | 19.6 | 83.5 | 65  | 987 |
| 1996 10 17 18 12 LILI | 20.5 | 83.1 | 70  | 984 |
| 1996 10 18 0 12 LILI  | 21.3 | 82.8 | 70  | 982 |
| 1996 10 18 6 12 LILI  | 21.8 | 82.2 | 75  | 980 |
| 1996 10 18 12 12 LILI | 22.4 | 81.5 | 85  | 975 |
| 1996 10 18 18 12 LILI | 22.5 | 80.0 | 80  | 975 |
| 1996 10 19 0 12 LILI  | 23.0 | 78.2 | 85  | 975 |
| 1996 10 19 6 12 LILI  | 23.5 | 76.2 | 90  | 970 |
| 1996 10 19 12 12 LILI | 24.4 | 74.0 | 100 | 960 |
| 1996 10 19 18 12 LILI | 25.5 | 71.5 | 90  | 962 |
| 1996 10 20 0 12 LILI  | 26.9 | 69.0 | 80  | 964 |
| 1996 10 20 6 12 LILI  | 28.3 | 67.0 | 80  | 968 |
| 1996 10 20 12 12 LILI | 29.6 | 65.0 | 85  | 960 |
| 1996 10 20 18 12 LILI | 30.7 | 62.9 | 75  | 970 |
| 1996 10 21 0 12 LILI  | 31.9 | 60.8 | 75  | 980 |
| 1996 10 21 6 12 LILI  | 33.0 | 59.1 | 70  | 985 |
| 1996 10 21 12 12 LILI | 33.7 | 57.9 | 65  | 986 |
| 1996 10 21 18 12 LILI | 34.0 | 57.0 | 65  | 987 |
| 1996 10 22 0 12 LILI  | 34.0 | 55.9 | 65  | 987 |
| 1996 10 22 6 12 LILI  | 33.8 | 55.2 | 65  | 987 |
| 1996 10 22 12 12 LILI | 33.7 | 54.6 | 65  | 987 |
| 1996 10 22 18 12 LILI | 33.5 | 54.0 | 65  | 987 |
| 1996 10 23 0 12 LILI  | 33.4 | 53.9 | 65  | 987 |
| 1996 10 23 6 12 LILI  | 33.2 | 53.8 | 65  | 985 |
| 1996 10 23 12 12 LILI | 33.1 | 53.7 | 65  | 981 |
| 1996 10 23 18 12 LILI | 33.3 | 53.2 | 70  | 979 |
| 1996 10 24 0 12 LILI  | 33.7 | 52.8 | 70  | 979 |
| 1996 10 24 6 12 LILI  | 34.0 | 52.5 | 70  | 979 |
| 1996 10 24 12 12 LILI | 34.0 | 51.9 | 70  | 979 |
| 1996 10 24 18 12 LILI | 34.1 | 51.2 | 75  | 979 |
| 1996 10 25 0 12 LILI  | 34.3 | 49.9 | 80  | 977 |
| 1996 10 25 6 12 LILI  | 35.0 | 47.8 | 80  | 973 |
| 1996 10 25 12 12 LILI | 35.8 | 45.4 | 85  | 970 |
| 1996 10 25 18 12 LILI | 37.2 | 43.3 | 80  | 971 |
| 1996 10 26 0 12 LILI  | 38.1 | 41.0 | 75  | 975 |
| 1996 10 26 6 12 LILI  | 39.2 | 38.8 | 70  | 978 |
| 1996 10 26 12 12 LILI | 40.5 | 35.8 | 65  | 979 |
| 1996 10 26 18 12 LILI | 42.3 | 33.2 | 60  | 980 |
| 1996 10 27 0 12 LILI  | 44.3 | 30.5 | 55  | 978 |
| 1996 10 27 6 12 LILI  | 46.3 | 27.2 | 55  | 980 |
| 1996 10 27 12 12 LILI | 48.2 | 23.1 | 55  | 978 |
| 1996 10 27 18 12 LILI | 50.3 | 19.0 | 55  | 973 |
| 1996 10 28 0 12 LILI  | 52.5 | 15.5 | 55  | 973 |
| 1996 10 28 6 12 LILI  | 53.8 | 12.0 | 55  | 973 |

|                        |      |       |    |      |
|------------------------|------|-------|----|------|
| 1996 10 28 12 12 LILI  | 54.0 | 7.5   | 55 | 970  |
| 1996 10 28 18 12 LILI  | 54.5 | 3.5   | 55 | 970  |
| 1996 10 29 0 12 LILI   | 54.0 | 359.0 | 55 | 976  |
| 1996 11 13 12 13 MARCO | 10.5 | 77.5  | 20 | 1009 |
| 1996 11 13 18 13 MARCO | 11.3 | 78.0  | 20 | 1009 |
| 1996 11 14 0 13 MARCO  | 12.0 | 78.5  | 20 | 1009 |
| 1996 11 14 6 13 MARCO  | 12.8 | 78.9  | 20 | 1009 |
| 1996 11 14 12 13 MARCO | 13.5 | 79.0  | 20 | 1008 |
| 1996 11 14 18 13 MARCO | 14.0 | 79.0  | 20 | 1008 |
| 1996 11 15 0 13 MARCO  | 14.3 | 79.0  | 20 | 1008 |
| 1996 11 15 6 13 MARCO  | 14.7 | 79.0  | 20 | 1008 |
| 1996 11 15 12 13 MARCO | 15.0 | 79.0  | 20 | 1008 |
| 1996 11 15 18 13 MARCO | 15.5 | 79.0  | 20 | 1008 |
| 1996 11 16 0 13 MARCO  | 15.8 | 79.0  | 20 | 1008 |
| 1996 11 16 6 13 MARCO  | 16.2 | 79.0  | 20 | 1008 |
| 1996 11 16 12 13 MARCO | 16.5 | 79.0  | 25 | 1007 |
| 1996 11 16 18 13 MARCO | 17.0 | 79.0  | 30 | 1007 |
| 1996 11 17 0 13 MARCO  | 16.8 | 79.8  | 30 | 1007 |
| 1996 11 17 6 13 MARCO  | 16.3 | 80.5  | 30 | 1007 |
| 1996 11 17 12 13 MARCO | 15.8 | 80.8  | 30 | 1007 |
| 1996 11 17 18 13 MARCO | 15.0 | 81.0  | 30 | 1006 |
| 1996 11 18 0 13 MARCO  | 14.9 | 81.0  | 30 | 1006 |
| 1996 11 18 6 13 MARCO  | 14.7 | 81.0  | 30 | 1005 |
| 1996 11 18 12 13 MARCO | 14.6 | 81.0  | 30 | 1004 |
| 1996 11 18 18 13 MARCO | 14.5 | 81.0  | 30 | 1003 |
| 1996 11 19 0 13 MARCO  | 14.2 | 81.0  | 30 | 1001 |
| 1996 11 19 6 13 MARCO  | 13.8 | 80.9  | 35 | 998  |
| 1996 11 19 12 13 MARCO | 13.5 | 80.7  | 45 | 997  |
| 1996 11 19 18 13 MARCO | 13.5 | 80.2  | 55 | 995  |
| 1996 11 20 0 13 MARCO  | 13.8 | 79.5  | 60 | 990  |
| 1996 11 20 6 13 MARCO  | 13.8 | 78.5  | 65 | 983  |
| 1996 11 20 12 13 MARCO | 14.2 | 77.8  | 65 | 989  |
| 1996 11 20 18 13 MARCO | 14.6 | 77.4  | 45 | 1000 |
| 1996 11 21 0 13 MARCO  | 14.9 | 77.1  | 45 | 1000 |
| 1996 11 21 6 13 MARCO  | 15.1 | 76.8  | 45 | 995  |
| 1996 11 21 12 13 MARCO | 15.3 | 76.6  | 50 | 993  |
| 1996 11 21 18 13 MARCO | 15.6 | 76.5  | 50 | 995  |
| 1996 11 22 0 13 MARCO  | 15.8 | 76.3  | 55 | 992  |
| 1996 11 22 6 13 MARCO  | 15.9 | 76.0  | 55 | 985  |
| 1996 11 22 12 13 MARCO | 15.9 | 75.4  | 60 | 987  |
| 1996 11 22 18 13 MARCO | 15.9 | 75.0  | 50 | 995  |
| 1996 11 23 0 13 MARCO  | 16.0 | 74.7  | 45 | 995  |
| 1996 11 23 6 13 MARCO  | 15.9 | 74.5  | 35 | 995  |
| 1996 11 23 12 13 MARCO | 15.7 | 74.5  | 35 | 995  |



|                        |      |      |         |
|------------------------|------|------|---------|
| 1996 11 23 18 13 MARCO | 15.6 | 74.8 | 30 1000 |
| 1996 11 24 0 13 MARCO  | 15.8 | 76.0 | 30 1002 |
| 1996 11 24 6 13 MARCO  | 15.9 | 77.0 | 30 1003 |
| 1996 11 24 12 13 MARCO | 16.0 | 78.0 | 35 1003 |
| 1996 11 24 18 13 MARCO | 16.0 | 78.9 | 35 1003 |
| 1996 11 25 0 13 MARCO  | 16.7 | 80.2 | 45 1002 |
| 1996 11 25 6 13 MARCO  | 17.5 | 81.5 | 50 1002 |
| 1996 11 25 12 13 MARCO | 18.3 | 82.6 | 55 1001 |
| 1996 11 25 18 13 MARCO | 19.2 | 83.5 | 45 1009 |
| 1996 11 26 0 13 MARCO  | 19.7 | 84.0 | 40 1009 |
| 1996 11 26 6 13 MARCO  | 20.1 | 84.4 | 35 1010 |
| 1996 11 26 12 13 MARCO | 20.1 | 84.3 | 30 1010 |
| 1996 11 26 18 13 MARCO | 19.6 | 84.8 | 25 1010 |
| 1997 5 31 18 1 SUBTROP | 28.5 | 77.4 | 25 1011 |
| 1997 6 1 0 1 SUBTROP   | 29.5 | 77.1 | 25 1009 |
| 1997 6 1 6 1 SUBTROP   | 31.2 | 76.3 | 30 1006 |
| 1997 6 1 12 1 SUBTROP  | 33.2 | 75.3 | 35 1003 |
| 1997 6 1 18 1 SUBTROP  | 35.5 | 74.1 | 45 1004 |
| 1997 6 2 0 1 SUBTROP   | 37.6 | 72.2 | 45 1006 |
| 1997 6 2 6 1 SUBTROP   | 39.5 | 70.4 | 40 1008 |
| 1997 6 2 12 1 SUBTROP  | 40.0 | 68.4 | 35 1009 |
| 1997 6 2 18 1 SUBTROP  | 40.0 | 66.3 | 30 1012 |
| 1997 6 30 12 2 ANA     | 32.0 | 77.2 | 30 1013 |
| 1997 6 30 18 2 ANA     | 32.0 | 76.6 | 30 1011 |
| 1997 7 1 0 2 ANA       | 31.9 | 76.0 | 30 1009 |
| 1997 7 1 6 2 ANA       | 31.8 | 75.4 | 35 1006 |
| 1997 7 1 12 2 ANA      | 31.7 | 74.6 | 40 1004 |
| 1997 7 1 18 2 ANA      | 31.4 | 73.8 | 40 1002 |
| 1997 7 2 0 2 ANA       | 31.4 | 72.9 | 40 1000 |
| 1997 7 2 6 2 ANA       | 31.7 | 72.0 | 35 1000 |
| 1997 7 2 12 2 ANA      | 32.1 | 71.2 | 35 1000 |
| 1997 7 2 18 2 ANA      | 32.7 | 70.5 | 35 1000 |
| 1997 7 3 0 2 ANA       | 33.5 | 69.8 | 35 1001 |
| 1997 7 3 6 2 ANA       | 34.4 | 69.2 | 35 1001 |
| 1997 7 3 12 2 ANA      | 35.2 | 68.4 | 35 1002 |
| 1997 7 3 18 2 ANA      | 36.1 | 67.5 | 30 1002 |
| 1997 7 4 0 2 ANA       | 36.9 | 66.2 | 25 1003 |
| 1997 7 4 6 2 ANA       | 37.7 | 64.5 | 25 1003 |
| 1997 7 4 12 2 ANA      | 38.4 | 62.4 | 25 1004 |
| 1997 7 4 18 2 ANA      | 39.5 | 59.5 | 25 1004 |
| 1997 7 5 0 2 ANA       | 41.0 | 58.0 | 25 1005 |
| 1997 7 11 6 3 BILL     | 30.4 | 69.9 | 30 1014 |
| 1997 7 11 12 3 BILL    | 31.8 | 68.9 | 40 1013 |
| 1997 7 11 18 3 BILL    | 33.1 | 67.6 | 45 1010 |

|      |      |    |             |      |      |    |      |
|------|------|----|-------------|------|------|----|------|
| 1997 | 7 12 | 0  | 3 BILL      | 34.7 | 65.8 | 50 | 1005 |
| 1997 | 7 12 | 6  | 3 BILL      | 36.3 | 63.6 | 60 | 995  |
| 1997 | 7 12 | 12 | 3 BILL      | 37.9 | 61.1 | 65 | 987  |
| 1997 | 7 12 | 18 | 3 BILL      | 39.6 | 58.4 | 65 | 987  |
| 1997 | 7 13 | 0  | 3 BILL      | 41.6 | 55.4 | 60 | 990  |
| 1997 | 7 13 | 6  | 3 BILL      | 44.0 | 53.0 | 40 | 990  |
| 1997 | 7 13 | 0  | 4 CLAUDETTE | 31.3 | 73.6 | 25 | 1012 |
| 1997 | 7 13 | 6  | 4 CLAUDETTE | 31.3 | 73.3 | 25 | 1011 |
| 1997 | 7 13 | 12 | 4 CLAUDETTE | 31.6 | 73.1 | 30 | 1008 |
| 1997 | 7 13 | 18 | 4 CLAUDETTE | 31.9 | 73.0 | 40 | 1004 |
| 1997 | 7 14 | 0  | 4 CLAUDETTE | 32.3 | 73.0 | 40 | 1003 |
| 1997 | 7 14 | 6  | 4 CLAUDETTE | 32.7 | 72.9 | 40 | 1003 |
| 1997 | 7 14 | 12 | 4 CLAUDETTE | 33.4 | 72.7 | 40 | 1004 |
| 1997 | 7 14 | 18 | 4 CLAUDETTE | 34.0 | 72.6 | 40 | 1005 |
| 1997 | 7 15 | 0  | 4 CLAUDETTE | 34.9 | 71.8 | 35 | 1005 |
| 1997 | 7 15 | 6  | 4 CLAUDETTE | 35.6 | 70.9 | 35 | 1006 |
| 1997 | 7 15 | 12 | 4 CLAUDETTE | 36.2 | 69.3 | 40 | 1009 |
| 1997 | 7 15 | 18 | 4 CLAUDETTE | 36.6 | 67.2 | 35 | 1009 |
| 1997 | 7 16 | 0  | 4 CLAUDETTE | 36.7 | 64.9 | 30 | 1009 |
| 1997 | 7 16 | 6  | 4 CLAUDETTE | 36.6 | 62.7 | 35 | 1006 |
| 1997 | 7 16 | 12 | 4 CLAUDETTE | 36.3 | 60.5 | 35 | 1007 |
| 1997 | 7 16 | 18 | 4 CLAUDETTE | 35.9 | 57.9 | 30 | 1009 |
| 1997 | 7 16 | 12 | 5 DANNY     | 27.4 | 92.6 | 25 | 1013 |
| 1997 | 7 16 | 18 | 5 DANNY     | 27.5 | 92.5 | 30 | 1013 |
| 1997 | 7 17 | 0  | 5 DANNY     | 27.7 | 92.3 | 30 | 1011 |
| 1997 | 7 17 | 6  | 5 DANNY     | 27.9 | 92.0 | 30 | 1007 |
| 1997 | 7 17 | 12 | 5 DANNY     | 28.3 | 91.4 | 40 | 1003 |
| 1997 | 7 17 | 18 | 5 DANNY     | 28.6 | 91.0 | 50 | 1002 |
| 1997 | 7 18 | 0  | 5 DANNY     | 28.9 | 90.2 | 55 | 997  |
| 1997 | 7 18 | 6  | 5 DANNY     | 29.2 | 89.9 | 65 | 992  |
| 1997 | 7 18 | 12 | 5 DANNY     | 29.5 | 89.4 | 70 | 990  |
| 1997 | 7 18 | 18 | 5 DANNY     | 29.7 | 89.0 | 70 | 988  |
| 1997 | 7 19 | 0  | 5 DANNY     | 29.8 | 88.4 | 70 | 984  |
| 1997 | 7 19 | 6  | 5 DANNY     | 30.1 | 88.1 | 65 | 987  |
| 1997 | 7 19 | 12 | 5 DANNY     | 30.3 | 88.0 | 70 | 984  |
| 1997 | 7 19 | 18 | 5 DANNY     | 30.4 | 87.9 | 65 | 986  |
| 1997 | 7 20 | 0  | 5 DANNY     | 30.3 | 87.6 | 60 | 991  |
| 1997 | 7 20 | 6  | 5 DANNY     | 30.4 | 87.5 | 45 | 998  |
| 1997 | 7 20 | 12 | 5 DANNY     | 30.6 | 87.4 | 35 | 1001 |
| 1997 | 7 20 | 18 | 5 DANNY     | 30.8 | 87.4 | 30 | 1004 |
| 1997 | 7 21 | 0  | 5 DANNY     | 31.0 | 87.5 | 25 | 1006 |
| 1997 | 7 21 | 6  | 5 DANNY     | 31.3 | 87.6 | 20 | 1009 |
| 1997 | 7 21 | 12 | 5 DANNY     | 31.7 | 87.6 | 20 | 1010 |
| 1997 | 7 21 | 18 | 5 DANNY     | 32.1 | 87.2 | 20 | 1011 |

|      |      |    |         |      |      |     |      |
|------|------|----|---------|------|------|-----|------|
| 1997 | 7 22 | 0  | 5 DANNY | 32.9 | 87.1 | 20  | 1011 |
| 1997 | 7 22 | 6  | 5 DANNY | 33.2 | 86.8 | 20  | 1012 |
| 1997 | 7 22 | 12 | 5 DANNY | 33.4 | 86.6 | 20  | 1013 |
| 1997 | 7 22 | 18 | 5 DANNY | 33.7 | 86.3 | 20  | 1013 |
| 1997 | 7 23 | 0  | 5 DANNY | 34.0 | 86.0 | 20  | 1012 |
| 1997 | 7 23 | 6  | 5 DANNY | 34.1 | 85.2 | 20  | 1012 |
| 1997 | 7 23 | 12 | 5 DANNY | 34.2 | 84.5 | 20  | 1012 |
| 1997 | 7 23 | 18 | 5 DANNY | 34.3 | 83.7 | 20  | 1012 |
| 1997 | 7 24 | 0  | 5 DANNY | 34.4 | 82.4 | 20  | 1012 |
| 1997 | 7 24 | 6  | 5 DANNY | 34.6 | 80.7 | 20  | 1010 |
| 1997 | 7 24 | 12 | 5 DANNY | 35.2 | 79.2 | 30  | 1004 |
| 1997 | 7 24 | 18 | 5 DANNY | 36.4 | 76.7 | 40  | 1000 |
| 1997 | 7 25 | 0  | 5 DANNY | 37.5 | 73.5 | 50  | 996  |
| 1997 | 7 25 | 6  | 5 DANNY | 38.6 | 71.6 | 50  | 995  |
| 1997 | 7 25 | 12 | 5 DANNY | 40.0 | 70.4 | 50  | 995  |
| 1997 | 7 25 | 18 | 5 DANNY | 40.7 | 69.9 | 50  | 994  |
| 1997 | 7 26 | 0  | 5 DANNY | 40.7 | 69.6 | 45  | 995  |
| 1997 | 7 26 | 6  | 5 DANNY | 40.4 | 68.0 | 45  | 998  |
| 1997 | 7 26 | 12 | 5 DANNY | 40.6 | 65.6 | 40  | 1003 |
| 1997 | 7 26 | 18 | 5 DANNY | 41.0 | 63.0 | 40  | 1004 |
| 1997 | 7 27 | 0  | 5 DANNY | 41.7 | 60.4 | 40  | 1004 |
| 1997 | 7 27 | 6  | 5 DANNY | 42.8 | 56.0 | 40  | 1004 |
| 1997 | 7 27 | 12 | 5 DANNY | 44.0 | 48.0 | 30  | 1005 |
| 1997 | 9 3  | 6  | 6 ERIKA | 10.9 | 44.1 | 30  | 1006 |
| 1997 | 9 3  | 12 | 6 ERIKA | 11.5 | 45.5 | 30  | 1005 |
| 1997 | 9 3  | 18 | 6 ERIKA | 12.3 | 47.1 | 35  | 1004 |
| 1997 | 9 4  | 0  | 6 ERIKA | 13.1 | 48.5 | 40  | 1002 |
| 1997 | 9 4  | 6  | 6 ERIKA | 13.9 | 49.9 | 50  | 1001 |
| 1997 | 9 4  | 12 | 6 ERIKA | 14.6 | 51.7 | 55  | 1000 |
| 1997 | 9 4  | 18 | 6 ERIKA | 15.2 | 53.7 | 65  | 999  |
| 1997 | 9 5  | 0  | 6 ERIKA | 15.6 | 55.3 | 65  | 998  |
| 1997 | 9 5  | 6  | 6 ERIKA | 16.0 | 56.4 | 65  | 997  |
| 1997 | 9 5  | 12 | 6 ERIKA | 16.4 | 57.4 | 65  | 996  |
| 1997 | 9 5  | 18 | 6 ERIKA | 17.0 | 58.3 | 65  | 990  |
| 1997 | 9 6  | 0  | 6 ERIKA | 17.5 | 59.2 | 65  | 988  |
| 1997 | 9 6  | 6  | 6 ERIKA | 18.1 | 60.0 | 70  | 986  |
| 1997 | 9 6  | 12 | 6 ERIKA | 18.6 | 60.9 | 70  | 982  |
| 1997 | 9 6  | 18 | 6 ERIKA | 19.0 | 61.7 | 75  | 980  |
| 1997 | 9 7  | 0  | 6 ERIKA | 19.4 | 62.4 | 75  | 979  |
| 1997 | 9 7  | 6  | 6 ERIKA | 19.7 | 62.8 | 75  | 978  |
| 1997 | 9 7  | 12 | 6 ERIKA | 20.2 | 63.1 | 75  | 975  |
| 1997 | 9 7  | 18 | 6 ERIKA | 20.6 | 63.2 | 90  | 970  |
| 1997 | 9 8  | 0  | 6 ERIKA | 21.2 | 63.2 | 95  | 966  |
| 1997 | 9 8  | 6  | 6 ERIKA | 21.8 | 63.2 | 100 | 961  |

|      |   |    |    |   |       |      |      |     |      |
|------|---|----|----|---|-------|------|------|-----|------|
| 1997 | 9 | 8  | 12 | 6 | ERIKA | 22.5 | 62.9 | 105 | 957  |
| 1997 | 9 | 8  | 18 | 6 | ERIKA | 23.2 | 62.5 | 110 | 952  |
| 1997 | 9 | 9  | 0  | 6 | ERIKA | 24.1 | 62.0 | 110 | 948  |
| 1997 | 9 | 9  | 6  | 6 | ERIKA | 25.2 | 61.4 | 110 | 946  |
| 1997 | 9 | 9  | 12 | 6 | ERIKA | 26.5 | 60.8 | 110 | 947  |
| 1997 | 9 | 9  | 18 | 6 | ERIKA | 27.9 | 60.2 | 110 | 951  |
| 1997 | 9 | 10 | 0  | 6 | ERIKA | 29.3 | 59.6 | 105 | 955  |
| 1997 | 9 | 10 | 6  | 6 | ERIKA | 30.8 | 58.9 | 100 | 960  |
| 1997 | 9 | 10 | 12 | 6 | ERIKA | 32.2 | 58.3 | 95  | 965  |
| 1997 | 9 | 10 | 18 | 6 | ERIKA | 33.6 | 57.5 | 90  | 970  |
| 1997 | 9 | 11 | 0  | 6 | ERIKA | 34.8 | 56.4 | 80  | 973  |
| 1997 | 9 | 11 | 6  | 6 | ERIKA | 35.7 | 55.1 | 75  | 977  |
| 1997 | 9 | 11 | 12 | 6 | ERIKA | 36.4 | 53.6 | 70  | 984  |
| 1997 | 9 | 11 | 18 | 6 | ERIKA | 37.1 | 51.9 | 65  | 988  |
| 1997 | 9 | 12 | 0  | 6 | ERIKA | 37.6 | 49.9 | 60  | 990  |
| 1997 | 9 | 12 | 6  | 6 | ERIKA | 38.0 | 48.0 | 55  | 994  |
| 1997 | 9 | 12 | 12 | 6 | ERIKA | 38.5 | 46.2 | 55  | 995  |
| 1997 | 9 | 12 | 18 | 6 | ERIKA | 38.9 | 44.9 | 50  | 995  |
| 1997 | 9 | 13 | 0  | 6 | ERIKA | 39.0 | 44.0 | 45  | 995  |
| 1997 | 9 | 13 | 6  | 6 | ERIKA | 38.9 | 43.2 | 45  | 995  |
| 1997 | 9 | 13 | 12 | 6 | ERIKA | 38.5 | 42.3 | 45  | 995  |
| 1997 | 9 | 13 | 18 | 6 | ERIKA | 38.1 | 41.3 | 45  | 995  |
| 1997 | 9 | 14 | 0  | 6 | ERIKA | 37.8 | 40.2 | 45  | 995  |
| 1997 | 9 | 14 | 6  | 6 | ERIKA | 37.6 | 39.1 | 50  | 992  |
| 1997 | 9 | 14 | 12 | 6 | ERIKA | 37.6 | 37.9 | 55  | 989  |
| 1997 | 9 | 14 | 18 | 6 | ERIKA | 37.8 | 36.5 | 55  | 987  |
| 1997 | 9 | 15 | 0  | 6 | ERIKA | 38.2 | 35.0 | 60  | 984  |
| 1997 | 9 | 15 | 6  | 6 | ERIKA | 38.9 | 33.4 | 55  | 984  |
| 1997 | 9 | 15 | 12 | 6 | ERIKA | 39.7 | 31.7 | 50  | 983  |
| 1997 | 9 | 15 | 18 | 6 | ERIKA | 40.9 | 29.9 | 50  | 984  |
| 1997 | 9 | 16 | 0  | 6 | ERIKA | 42.2 | 28.2 | 50  | 985  |
| 1997 | 9 | 16 | 6  | 6 | ERIKA | 43.5 | 26.5 | 50  | 987  |
| 1997 | 9 | 16 | 12 | 6 | ERIKA | 45.0 | 24.5 | 50  | 989  |
| 1997 | 9 | 16 | 18 | 6 | ERIKA | 46.0 | 22.5 | 55  | 991  |
| 1997 | 9 | 17 | 0  | 6 | ERIKA | 46.8 | 21.0 | 60  | 993  |
| 1997 | 9 | 17 | 6  | 6 | ERIKA | 47.0 | 20.0 | 60  | 994  |
| 1997 | 9 | 17 | 12 | 6 | ERIKA | 46.5 | 19.0 | 60  | 992  |
| 1997 | 9 | 17 | 18 | 6 | ERIKA | 46.0 | 20.0 | 55  | 994  |
| 1997 | 9 | 18 | 0  | 6 | ERIKA | 47.2 | 19.8 | 50  | 996  |
| 1997 | 9 | 18 | 6  | 6 | ERIKA | 48.0 | 19.0 | 45  | 998  |
| 1997 | 9 | 18 | 12 | 6 | ERIKA | 48.5 | 18.0 | 40  | 1000 |
| 1997 | 9 | 18 | 18 | 6 | ERIKA | 48.8 | 17.5 | 40  | 1000 |
| 1997 | 9 | 19 | 0  | 6 | ERIKA | 48.9 | 17.0 | 35  | 1000 |
| 1997 | 9 | 19 | 6  | 6 | ERIKA | 48.9 | 16.2 | 30  | 1000 |

|      |    |    |    |   |        |      |      |    |      |
|------|----|----|----|---|--------|------|------|----|------|
| 1997 | 9  | 19 | 12 | 6 | ERIKA  | 49.0 | 15.3 | 30 | 1005 |
| 1997 | 9  | 19 | 18 | 6 | ERIKA  | 49.0 | 14.0 | 25 | 1009 |
| 1997 | 10 | 4  | 18 | 7 | FABIAN | 24.2 | 64.5 | 25 | 1009 |
| 1997 | 10 | 5  | 0  | 7 | FABIAN | 24.7 | 64.3 | 25 | 1009 |
| 1997 | 10 | 5  | 6  | 7 | FABIAN | 25.2 | 64.0 | 25 | 1009 |
| 1997 | 10 | 5  | 12 | 7 | FABIAN | 25.7 | 63.5 | 30 | 1007 |
| 1997 | 10 | 5  | 18 | 7 | FABIAN | 26.3 | 63.1 | 35 | 1005 |
| 1997 | 10 | 6  | 0  | 7 | FABIAN | 26.8 | 62.6 | 35 | 1005 |
| 1997 | 10 | 6  | 6  | 7 | FABIAN | 27.2 | 61.9 | 35 | 1005 |
| 1997 | 10 | 6  | 12 | 7 | FABIAN | 27.7 | 61.3 | 35 | 1005 |
| 1997 | 10 | 6  | 18 | 7 | FABIAN | 28.2 | 60.2 | 35 | 1005 |
| 1997 | 10 | 7  | 0  | 7 | FABIAN | 28.8 | 59.1 | 35 | 1005 |
| 1997 | 10 | 7  | 6  | 7 | FABIAN | 29.2 | 57.9 | 35 | 1005 |
| 1997 | 10 | 7  | 12 | 7 | FABIAN | 29.5 | 56.8 | 35 | 1004 |
| 1997 | 10 | 7  | 18 | 7 | FABIAN | 29.1 | 56.0 | 35 | 1005 |
| 1997 | 10 | 8  | 0  | 7 | FABIAN | 28.6 | 55.0 | 35 | 1005 |
| 1997 | 10 | 8  | 6  | 7 | FABIAN | 28.4 | 53.4 | 35 | 1005 |
| 1997 | 10 | 8  | 12 | 7 | FABIAN | 28.7 | 51.4 | 35 | 1005 |
| 1997 | 10 | 8  | 18 | 7 | FABIAN | 29.2 | 48.8 | 40 | 1005 |
| 1997 | 10 | 14 | 12 | 8 | GRACE  | 20.0 | 68.7 | 30 | 1002 |
| 1997 | 10 | 14 | 18 | 8 | GRACE  | 20.3 | 69.8 | 30 | 1001 |
| 1997 | 10 | 15 | 0  | 8 | GRACE  | 20.3 | 69.6 | 35 | 999  |
| 1997 | 10 | 15 | 6  | 8 | GRACE  | 20.3 | 68.9 | 35 | 999  |
| 1997 | 10 | 15 | 12 | 8 | GRACE  | 20.6 | 68.0 | 40 | 999  |
| 1997 | 10 | 15 | 18 | 8 | GRACE  | 20.8 | 66.5 | 40 | 999  |
| 1997 | 10 | 16 | 0  | 8 | GRACE  | 21.2 | 64.4 | 40 | 999  |
| 1997 | 10 | 16 | 6  | 8 | GRACE  | 21.6 | 61.6 | 35 | 1000 |
| 1997 | 10 | 16 | 12 | 8 | GRACE  | 22.4 | 58.8 | 35 | 1000 |
| 1997 | 10 | 16 | 18 | 8 | GRACE  | 23.6 | 56.2 | 35 | 1001 |
| 1997 | 10 | 17 | 0  | 8 | GRACE  | 24.0 | 53.6 | 35 | 1002 |
| 1997 | 10 | 17 | 6  | 8 | GRACE  | 24.3 | 50.5 | 35 | 1003 |
| 1997 | 10 | 17 | 12 | 8 | GRACE  | 24.5 | 47.3 | 30 | 1004 |
| 1998 | 7  | 27 | 12 | 1 | ALEX   | 11.3 | 25.4 | 25 | 1009 |
| 1998 | 7  | 27 | 18 | 1 | ALEX   | 11.7 | 27.2 | 25 | 1009 |
| 1998 | 7  | 28 | 0  | 1 | ALEX   | 12.2 | 29.2 | 25 | 1009 |
| 1998 | 7  | 28 | 6  | 1 | ALEX   | 12.6 | 31.3 | 25 | 1008 |
| 1998 | 7  | 28 | 12 | 1 | ALEX   | 12.9 | 33.3 | 30 | 1007 |
| 1998 | 7  | 28 | 18 | 1 | ALEX   | 13.1 | 35.1 | 30 | 1006 |
| 1998 | 7  | 29 | 0  | 1 | ALEX   | 13.3 | 36.8 | 35 | 1005 |
| 1998 | 7  | 29 | 6  | 1 | ALEX   | 13.5 | 38.5 | 35 | 1005 |
| 1998 | 7  | 29 | 12 | 1 | ALEX   | 13.7 | 40.0 | 35 | 1005 |
| 1998 | 7  | 29 | 18 | 1 | ALEX   | 13.9 | 41.3 | 35 | 1005 |
| 1998 | 7  | 30 | 0  | 1 | ALEX   | 14.2 | 42.6 | 35 | 1005 |
| 1998 | 7  | 30 | 6  | 1 | ALEX   | 14.4 | 43.9 | 40 | 1003 |

|      |   |    |    |   |        |      |      |     |      |
|------|---|----|----|---|--------|------|------|-----|------|
| 1998 | 7 | 30 | 12 | 1 | ALEX   | 14.7 | 45.0 | 40  | 1003 |
| 1998 | 7 | 30 | 18 | 1 | ALEX   | 15.1 | 46.1 | 45  | 1003 |
| 1998 | 7 | 31 | 0  | 1 | ALEX   | 15.4 | 47.1 | 45  | 1002 |
| 1998 | 7 | 31 | 6  | 1 | ALEX   | 15.6 | 48.1 | 45  | 1003 |
| 1998 | 7 | 31 | 12 | 1 | ALEX   | 15.7 | 49.2 | 45  | 1003 |
| 1998 | 7 | 31 | 18 | 1 | ALEX   | 15.8 | 50.4 | 40  | 1005 |
| 1998 | 8 | 1  | 0  | 1 | ALEX   | 15.9 | 51.7 | 35  | 1007 |
| 1998 | 8 | 1  | 6  | 1 | ALEX   | 16.3 | 53.1 | 35  | 1009 |
| 1998 | 8 | 1  | 12 | 1 | ALEX   | 16.9 | 54.3 | 40  | 1009 |
| 1998 | 8 | 1  | 18 | 1 | ALEX   | 17.7 | 55.4 | 40  | 1012 |
| 1998 | 8 | 2  | 0  | 1 | ALEX   | 18.4 | 56.5 | 35  | 1012 |
| 1998 | 8 | 2  | 6  | 1 | ALEX   | 19.0 | 57.7 | 35  | 1012 |
| 1998 | 8 | 2  | 12 | 1 | ALEX   | 19.9 | 58.6 | 35  | 1012 |
| 1998 | 8 | 2  | 18 | 1 | ALEX   | 21.0 | 59.3 | 30  | 1014 |
| 1998 | 8 | 19 | 12 | 2 | BONNIE | 14.7 | 48.1 | 25  | 1009 |
| 1998 | 8 | 19 | 18 | 2 | BONNIE | 15.4 | 50.1 | 30  | 1009 |
| 1998 | 8 | 20 | 0  | 2 | BONNIE | 16.2 | 52.2 | 30  | 1009 |
| 1998 | 8 | 20 | 6  | 2 | BONNIE | 16.9 | 54.7 | 30  | 1008 |
| 1998 | 8 | 20 | 12 | 2 | BONNIE | 17.3 | 57.3 | 35  | 1007 |
| 1998 | 8 | 20 | 18 | 2 | BONNIE | 18.2 | 59.6 | 35  | 1006 |
| 1998 | 8 | 21 | 0  | 2 | BONNIE | 18.7 | 61.3 | 40  | 1005 |
| 1998 | 8 | 21 | 6  | 2 | BONNIE | 19.1 | 62.9 | 45  | 1002 |
| 1998 | 8 | 21 | 12 | 2 | BONNIE | 19.5 | 64.5 | 50  | 1000 |
| 1998 | 8 | 21 | 18 | 2 | BONNIE | 20.3 | 65.9 | 55  | 999  |
| 1998 | 8 | 22 | 0  | 2 | BONNIE | 21.1 | 67.3 | 65  | 991  |
| 1998 | 8 | 22 | 6  | 2 | BONNIE | 21.8 | 68.7 | 70  | 989  |
| 1998 | 8 | 22 | 12 | 2 | BONNIE | 22.3 | 69.8 | 75  | 980  |
| 1998 | 8 | 22 | 18 | 2 | BONNIE | 23.0 | 70.5 | 85  | 970  |
| 1998 | 8 | 23 | 0  | 2 | BONNIE | 23.4 | 71.0 | 90  | 962  |
| 1998 | 8 | 23 | 6  | 2 | BONNIE | 23.8 | 71.3 | 95  | 960  |
| 1998 | 8 | 23 | 12 | 2 | BONNIE | 24.1 | 71.5 | 100 | 958  |
| 1998 | 8 | 23 | 18 | 2 | BONNIE | 24.4 | 71.7 | 100 | 955  |
| 1998 | 8 | 24 | 0  | 2 | BONNIE | 24.8 | 71.8 | 100 | 954  |
| 1998 | 8 | 24 | 6  | 2 | BONNIE | 25.2 | 72.1 | 100 | 960  |
| 1998 | 8 | 24 | 12 | 2 | BONNIE | 25.6 | 72.4 | 100 | 962  |
| 1998 | 8 | 24 | 18 | 2 | BONNIE | 26.1 | 72.8 | 100 | 962  |
| 1998 | 8 | 25 | 0  | 2 | BONNIE | 26.9 | 73.2 | 100 | 963  |
| 1998 | 8 | 25 | 6  | 2 | BONNIE | 27.8 | 73.8 | 100 | 962  |
| 1998 | 8 | 25 | 12 | 2 | BONNIE | 28.8 | 74.7 | 100 | 963  |
| 1998 | 8 | 25 | 18 | 2 | BONNIE | 29.8 | 75.6 | 100 | 963  |
| 1998 | 8 | 26 | 0  | 2 | BONNIE | 30.8 | 76.4 | 100 | 958  |
| 1998 | 8 | 26 | 6  | 2 | BONNIE | 31.7 | 77.3 | 100 | 964  |
| 1998 | 8 | 26 | 12 | 2 | BONNIE | 32.7 | 77.8 | 100 | 965  |
| 1998 | 8 | 26 | 18 | 2 | BONNIE | 33.4 | 77.8 | 100 | 962  |

|      |      |    |            |      |       |    |      |
|------|------|----|------------|------|-------|----|------|
| 1998 | 8 27 | 0  | 2 BONNIE   | 34.0 | 77.7  | 95 | 963  |
| 1998 | 8 27 | 6  | 2 BONNIE   | 34.5 | 77.5  | 85 | 965  |
| 1998 | 8 27 | 12 | 2 BONNIE   | 34.9 | 77.1  | 75 | 974  |
| 1998 | 8 27 | 18 | 2 BONNIE   | 35.4 | 76.6  | 60 | 980  |
| 1998 | 8 28 | 0  | 2 BONNIE   | 35.8 | 75.9  | 65 | 983  |
| 1998 | 8 28 | 6  | 2 BONNIE   | 36.2 | 75.1  | 75 | 985  |
| 1998 | 8 28 | 12 | 2 BONNIE   | 36.7 | 74.3  | 65 | 990  |
| 1998 | 8 28 | 18 | 2 BONNIE   | 37.3 | 73.2  | 60 | 991  |
| 1998 | 8 29 | 0  | 2 BONNIE   | 38.3 | 71.4  | 45 | 993  |
| 1998 | 8 29 | 6  | 2 BONNIE   | 39.2 | 69.6  | 45 | 999  |
| 1998 | 8 29 | 12 | 2 BONNIE   | 40.2 | 67.8  | 45 | 999  |
| 1998 | 8 29 | 18 | 2 BONNIE   | 41.6 | 64.8  | 45 | 1000 |
| 1998 | 8 30 | 0  | 2 BONNIE   | 42.9 | 61.5  | 45 | 1000 |
| 1998 | 8 30 | 6  | 2 BONNIE   | 44.3 | 57.0  | 45 | 1000 |
| 1998 | 8 30 | 12 | 2 BONNIE   | 44.5 | 53.5  | 45 | 1000 |
| 1998 | 8 30 | 18 | 2 BONNIE   | 44.0 | 50.0  | 45 | 998  |
| 1998 | 8 31 | 0  | 2 BONNIE   | 44.0 | 45.0  | 45 | 996  |
| 1998 | 8 31 | 6  | 2 BONNIE   | 43.0 | 41.0  | 40 | 996  |
| 1998 | 8 21 | 6  | 3 CHARLEY  | 25.3 | 92.3  | 25 | 1008 |
| 1998 | 8 21 | 12 | 3 CHARLEY  | 25.4 | 93.8  | 30 | 1008 |
| 1998 | 8 21 | 18 | 3 CHARLEY  | 26.0 | 94.5  | 40 | 1008 |
| 1998 | 8 22 | 0  | 3 CHARLEY  | 26.8 | 95.4  | 45 | 1006 |
| 1998 | 8 22 | 6  | 3 CHARLEY  | 27.5 | 96.5  | 60 | 1002 |
| 1998 | 8 22 | 12 | 3 CHARLEY  | 27.9 | 97.4  | 35 | 1001 |
| 1998 | 8 22 | 18 | 3 CHARLEY  | 28.3 | 98.1  | 30 | 1003 |
| 1998 | 8 23 | 0  | 3 CHARLEY  | 28.5 | 98.7  | 25 | 1005 |
| 1998 | 8 23 | 6  | 3 CHARLEY  | 28.7 | 99.3  | 20 | 1006 |
| 1998 | 8 23 | 12 | 3 CHARLEY  | 28.8 | 99.9  | 20 | 1007 |
| 1998 | 8 23 | 18 | 3 CHARLEY  | 29.1 | 100.6 | 20 | 1008 |
| 1998 | 8 24 | 0  | 3 CHARLEY  | 29.4 | 101.2 | 20 | 1008 |
| 1998 | 8 24 | 6  | 4 DANIELLE | 13.4 | 34.3  | 25 | 1007 |
| 1998 | 8 24 | 12 | 4 DANIELLE | 13.8 | 36.1  | 30 | 1006 |
| 1998 | 8 24 | 18 | 4 DANIELLE | 14.2 | 37.9  | 35 | 1005 |
| 1998 | 8 25 | 0  | 4 DANIELLE | 14.8 | 39.8  | 40 | 1003 |
| 1998 | 8 25 | 6  | 4 DANIELLE | 15.3 | 41.6  | 50 | 997  |
| 1998 | 8 25 | 12 | 4 DANIELLE | 16.2 | 43.3  | 65 | 990  |
| 1998 | 8 25 | 18 | 4 DANIELLE | 16.9 | 45.3  | 75 | 982  |
| 1998 | 8 26 | 0  | 4 DANIELLE | 17.6 | 47.3  | 80 | 980  |
| 1998 | 8 26 | 6  | 4 DANIELLE | 18.4 | 49.1  | 90 | 975  |
| 1998 | 8 26 | 12 | 4 DANIELLE | 19.1 | 51.1  | 85 | 980  |
| 1998 | 8 26 | 18 | 4 DANIELLE | 19.7 | 52.8  | 80 | 985  |
| 1998 | 8 27 | 0  | 4 DANIELLE | 20.1 | 54.9  | 80 | 993  |
| 1998 | 8 27 | 6  | 4 DANIELLE | 20.6 | 56.7  | 85 | 994  |
| 1998 | 8 27 | 12 | 4 DANIELLE | 21.2 | 58.5  | 90 | 994  |

|      |         |            |      |      |    |     |
|------|---------|------------|------|------|----|-----|
| 1998 | 8 27 18 | 4 DANIELLE | 21.8 | 60.1 | 85 | 994 |
| 1998 | 8 28 0  | 4 DANIELLE | 22.4 | 61.7 | 80 | 992 |
| 1998 | 8 28 6  | 4 DANIELLE | 22.7 | 63.2 | 80 | 992 |
| 1998 | 8 28 12 | 4 DANIELLE | 23.0 | 64.4 | 80 | 989 |
| 1998 | 8 28 18 | 4 DANIELLE | 23.4 | 65.7 | 80 | 986 |
| 1998 | 8 29 0  | 4 DANIELLE | 23.9 | 66.9 | 75 | 989 |
| 1998 | 8 29 6  | 4 DANIELLE | 24.3 | 68.2 | 70 | 990 |
| 1998 | 8 29 12 | 4 DANIELLE | 24.8 | 69.4 | 70 | 988 |
| 1998 | 8 29 18 | 4 DANIELLE | 25.4 | 70.5 | 70 | 987 |
| 1998 | 8 30 0  | 4 DANIELLE | 25.9 | 71.4 | 65 | 987 |
| 1998 | 8 30 6  | 4 DANIELLE | 26.4 | 72.2 | 65 | 988 |
| 1998 | 8 30 12 | 4 DANIELLE | 26.9 | 73.1 | 65 | 990 |
| 1998 | 8 30 18 | 4 DANIELLE | 27.5 | 73.9 | 65 | 987 |
| 1998 | 8 31 0  | 4 DANIELLE | 27.9 | 74.1 | 70 | 983 |
| 1998 | 8 31 6  | 4 DANIELLE | 28.4 | 74.3 | 75 | 980 |
| 1998 | 8 31 12 | 4 DANIELLE | 29.2 | 74.1 | 90 | 977 |
| 1998 | 8 31 18 | 4 DANIELLE | 30.0 | 73.7 | 85 | 975 |
| 1998 | 9 1 0   | 4 DANIELLE | 30.9 | 73.3 | 85 | 973 |
| 1998 | 9 1 6   | 4 DANIELLE | 31.7 | 72.7 | 85 | 972 |
| 1998 | 9 1 12  | 4 DANIELLE | 32.2 | 72.0 | 85 | 968 |
| 1998 | 9 1 18  | 4 DANIELLE | 32.9 | 70.7 | 90 | 965 |
| 1998 | 9 2 0   | 4 DANIELLE | 33.7 | 69.1 | 80 | 967 |
| 1998 | 9 2 6   | 4 DANIELLE | 34.6 | 67.6 | 75 | 970 |
| 1998 | 9 2 12  | 4 DANIELLE | 36.0 | 65.4 | 70 | 975 |
| 1998 | 9 2 18  | 4 DANIELLE | 37.9 | 63.1 | 70 | 975 |
| 1998 | 9 3 0   | 4 DANIELLE | 39.9 | 60.1 | 70 | 970 |
| 1998 | 9 3 6   | 4 DANIELLE | 42.1 | 57.5 | 70 | 960 |
| 1998 | 9 3 12  | 4 DANIELLE | 43.4 | 54.8 | 70 | 965 |
| 1998 | 9 3 18  | 4 DANIELLE | 44.6 | 51.9 | 65 | 965 |
| 1998 | 9 4 0   | 4 DANIELLE | 44.8 | 48.5 | 65 | 975 |
| 1998 | 9 4 6   | 4 DANIELLE | 44.9 | 44.0 | 60 | 985 |
| 1998 | 9 4 12  | 4 DANIELLE | 45.0 | 40.5 | 60 | 978 |
| 1998 | 9 4 18  | 4 DANIELLE | 45.3 | 37.0 | 60 | 976 |
| 1998 | 9 5 0   | 4 DANIELLE | 45.9 | 33.0 | 60 | 975 |
| 1998 | 9 5 6   | 4 DANIELLE | 46.5 | 28.0 | 60 | 973 |
| 1998 | 9 5 12  | 4 DANIELLE | 47.0 | 25.0 | 60 | 970 |
| 1998 | 9 5 18  | 4 DANIELLE | 48.0 | 22.0 | 60 | 967 |
| 1998 | 9 6 0   | 4 DANIELLE | 50.0 | 19.0 | 60 | 964 |
| 1998 | 9 6 6   | 4 DANIELLE | 51.5 | 18.0 | 55 | 965 |
| 1998 | 9 6 12  | 4 DANIELLE | 52.8 | 17.1 | 55 | 965 |
| 1998 | 9 6 18  | 4 DANIELLE | 53.3 | 16.7 | 55 | 967 |
| 1998 | 9 7 0   | 4 DANIELLE | 53.8 | 16.2 | 50 | 970 |
| 1998 | 9 7 6   | 4 DANIELLE | 54.5 | 16.0 | 45 | 975 |
| 1998 | 9 7 12  | 4 DANIELLE | 55.0 | 15.0 | 40 | 977 |



|      |   |    |    |   |          |      |      |    |      |
|------|---|----|----|---|----------|------|------|----|------|
| 1998 | 9 | 7  | 18 | 4 | DANIELLE | 55.8 | 14.0 | 35 | 979  |
| 1998 | 9 | 8  | 0  | 4 | DANIELLE | 56.4 | 13.1 | 30 | 980  |
| 1998 | 9 | 8  | 6  | 4 | DANIELLE | 57.0 | 12.0 | 30 | 980  |
| 1998 | 8 | 31 | 12 | 5 | EARL     | 21.6 | 93.5 | 30 | 1005 |
| 1998 | 8 | 31 | 18 | 5 | EARL     | 22.4 | 93.8 | 35 | 1002 |
| 1998 | 9 | 1  | 0  | 5 | EARL     | 23.2 | 93.7 | 35 | 1002 |
| 1998 | 9 | 1  | 6  | 5 | EARL     | 24.1 | 93.4 | 40 | 1001 |
| 1998 | 9 | 1  | 12 | 5 | EARL     | 25.0 | 93.1 | 45 | 999  |
| 1998 | 9 | 1  | 18 | 5 | EARL     | 25.8 | 92.5 | 50 | 998  |
| 1998 | 9 | 2  | 0  | 5 | EARL     | 26.8 | 91.5 | 50 | 998  |
| 1998 | 9 | 2  | 6  | 5 | EARL     | 27.6 | 90.4 | 50 | 996  |
| 1998 | 9 | 2  | 12 | 5 | EARL     | 28.2 | 89.0 | 70 | 994  |
| 1998 | 9 | 2  | 18 | 5 | EARL     | 28.7 | 87.9 | 85 | 988  |
| 1998 | 9 | 3  | 0  | 5 | EARL     | 29.4 | 86.8 | 80 | 985  |
| 1998 | 9 | 3  | 6  | 5 | EARL     | 30.1 | 85.7 | 70 | 987  |
| 1998 | 9 | 3  | 12 | 5 | EARL     | 31.3 | 84.0 | 45 | 990  |
| 1998 | 9 | 3  | 18 | 5 | EARL     | 32.4 | 82.4 | 40 | 994  |
| 1998 | 9 | 4  | 0  | 5 | EARL     | 33.2 | 80.5 | 40 | 994  |
| 1998 | 9 | 4  | 6  | 5 | EARL     | 34.5 | 79.0 | 50 | 995  |
| 1998 | 9 | 4  | 12 | 5 | EARL     | 35.9 | 77.2 | 50 | 998  |
| 1998 | 9 | 4  | 18 | 5 | EARL     | 36.5 | 75.0 | 50 | 1000 |
| 1998 | 9 | 5  | 0  | 5 | EARL     | 38.0 | 71.0 | 50 | 1000 |
| 1998 | 9 | 5  | 6  | 5 | EARL     | 40.0 | 65.5 | 50 | 998  |
| 1998 | 9 | 5  | 12 | 5 | EARL     | 42.5 | 61.0 | 50 | 990  |
| 1998 | 9 | 5  | 18 | 5 | EARL     | 45.0 | 56.0 | 50 | 986  |
| 1998 | 9 | 6  | 0  | 5 | EARL     | 47.0 | 54.0 | 50 | 979  |
| 1998 | 9 | 6  | 6  | 5 | EARL     | 48.0 | 53.0 | 50 | 968  |
| 1998 | 9 | 6  | 12 | 5 | EARL     | 49.0 | 52.0 | 55 | 964  |
| 1998 | 9 | 6  | 18 | 5 | EARL     | 49.5 | 50.0 | 55 | 966  |
| 1998 | 9 | 7  | 0  | 5 | EARL     | 50.0 | 48.0 | 55 | 968  |
| 1998 | 9 | 7  | 6  | 5 | EARL     | 50.5 | 45.0 | 50 | 970  |
| 1998 | 9 | 7  | 12 | 5 | EARL     | 51.0 | 41.0 | 45 | 978  |
| 1998 | 9 | 7  | 18 | 5 | EARL     | 51.0 | 37.0 | 45 | 978  |
| 1998 | 9 | 8  | 0  | 5 | EARL     | 51.0 | 32.0 | 40 | 982  |
| 1998 | 9 | 8  | 6  | 5 | EARL     | 51.5 | 28.5 | 40 | 982  |
| 1998 | 9 | 8  | 12 | 5 | EARL     | 52.0 | 25.0 | 35 | 983  |
| 1998 | 9 | 8  | 18 | 6 | FRANCES  | 25.5 | 94.5 | 30 | 1000 |
| 1998 | 9 | 9  | 0  | 6 | FRANCES  | 25.3 | 94.4 | 30 | 1000 |
| 1998 | 9 | 9  | 6  | 6 | FRANCES  | 25.0 | 94.5 | 30 | 999  |
| 1998 | 9 | 9  | 12 | 6 | FRANCES  | 24.6 | 94.7 | 30 | 998  |
| 1998 | 9 | 9  | 18 | 6 | FRANCES  | 24.2 | 95.5 | 35 | 997  |
| 1998 | 9 | 10 | 0  | 6 | FRANCES  | 23.5 | 95.6 | 40 | 995  |
| 1998 | 9 | 10 | 6  | 6 | FRANCES  | 24.2 | 95.0 | 40 | 995  |
| 1998 | 9 | 10 | 12 | 6 | FRANCES  | 25.3 | 95.2 | 45 | 996  |

|      |         |   |         |      |      |     |      |
|------|---------|---|---------|------|------|-----|------|
| 1998 | 9 10 18 | 6 | FRANCES | 26.6 | 95.2 | 45  | 996  |
| 1998 | 9 11 0  | 6 | FRANCES | 27.2 | 95.9 | 55  | 994  |
| 1998 | 9 11 6  | 6 | FRANCES | 28.2 | 96.9 | 45  | 990  |
| 1998 | 9 11 12 | 6 | FRANCES | 28.4 | 97.6 | 40  | 992  |
| 1998 | 9 11 18 | 6 | FRANCES | 28.5 | 97.0 | 35  | 994  |
| 1998 | 9 12 0  | 6 | FRANCES | 29.3 | 96.9 | 30  | 996  |
| 1998 | 9 12 6  | 6 | FRANCES | 30.2 | 96.8 | 30  | 998  |
| 1998 | 9 12 12 | 6 | FRANCES | 31.0 | 96.8 | 30  | 1000 |
| 1998 | 9 12 18 | 6 | FRANCES | 31.3 | 96.8 | 30  | 1001 |
| 1998 | 9 13 0  | 6 | FRANCES | 31.5 | 96.8 | 25  | 1002 |
| 1998 | 9 13 6  | 6 | FRANCES | 31.7 | 96.9 | 20  | 1002 |
| 1998 | 9 13 12 | 6 | FRANCES | 32.0 | 96.9 | 20  | 1003 |
| 1998 | 9 13 18 | 6 | FRANCES | 33.0 | 97.0 | 20  | 1003 |
| 1998 | 9 15 12 | 7 | GEORGES | 9.7  | 25.1 | 30  | 1009 |
| 1998 | 9 15 18 | 7 | GEORGES | 9.8  | 26.5 | 30  | 1009 |
| 1998 | 9 16 0  | 7 | GEORGES | 10.0 | 28.1 | 30  | 1009 |
| 1998 | 9 16 6  | 7 | GEORGES | 10.3 | 29.7 | 30  | 1009 |
| 1998 | 9 16 12 | 7 | GEORGES | 10.6 | 31.3 | 35  | 1005 |
| 1998 | 9 16 18 | 7 | GEORGES | 11.0 | 32.9 | 35  | 1003 |
| 1998 | 9 17 0  | 7 | GEORGES | 11.3 | 34.6 | 45  | 1000 |
| 1998 | 9 17 6  | 7 | GEORGES | 11.7 | 36.3 | 50  | 997  |
| 1998 | 9 17 12 | 7 | GEORGES | 12.0 | 38.1 | 55  | 994  |
| 1998 | 9 17 18 | 7 | GEORGES | 12.3 | 40.0 | 65  | 987  |
| 1998 | 9 18 0  | 7 | GEORGES | 12.5 | 42.0 | 70  | 984  |
| 1998 | 9 18 6  | 7 | GEORGES | 12.8 | 43.9 | 80  | 977  |
| 1998 | 9 18 12 | 7 | GEORGES | 13.1 | 45.7 | 85  | 973  |
| 1998 | 9 18 18 | 7 | GEORGES | 13.5 | 47.4 | 90  | 970  |
| 1998 | 9 19 0  | 7 | GEORGES | 13.9 | 49.0 | 90  | 970  |
| 1998 | 9 19 6  | 7 | GEORGES | 14.4 | 50.6 | 95  | 965  |
| 1998 | 9 19 12 | 7 | GEORGES | 14.9 | 52.0 | 110 | 954  |
| 1998 | 9 19 18 | 7 | GEORGES | 15.4 | 53.5 | 125 | 949  |
| 1998 | 9 20 0  | 7 | GEORGES | 15.7 | 54.9 | 130 | 939  |
| 1998 | 9 20 6  | 7 | GEORGES | 16.0 | 56.3 | 135 | 937  |
| 1998 | 9 20 12 | 7 | GEORGES | 16.2 | 57.7 | 130 | 939  |
| 1998 | 9 20 18 | 7 | GEORGES | 16.4 | 59.2 | 115 | 956  |
| 1998 | 9 21 0  | 7 | GEORGES | 16.7 | 60.6 | 100 | 963  |
| 1998 | 9 21 6  | 7 | GEORGES | 17.1 | 62.1 | 100 | 966  |
| 1998 | 9 21 12 | 7 | GEORGES | 17.4 | 63.6 | 95  | 966  |
| 1998 | 9 21 18 | 7 | GEORGES | 17.8 | 65.0 | 90  | 970  |
| 1998 | 9 22 0  | 7 | GEORGES | 18.2 | 66.3 | 90  | 970  |
| 1998 | 9 22 6  | 7 | GEORGES | 18.0 | 67.4 | 95  | 972  |
| 1998 | 9 22 12 | 7 | GEORGES | 18.2 | 68.5 | 105 | 964  |
| 1998 | 9 22 18 | 7 | GEORGES | 18.6 | 69.7 | 95  | 970  |
| 1998 | 9 23 0  | 7 | GEORGES | 18.8 | 70.8 | 70  | 980  |

|      |      |    |   |         |      |      |    |      |
|------|------|----|---|---------|------|------|----|------|
| 1998 | 9 23 | 6  | 7 | GEORGES | 19.0 | 72.1 | 65 | 990  |
| 1998 | 9 23 | 12 | 7 | GEORGES | 19.3 | 73.3 | 65 | 996  |
| 1998 | 9 23 | 18 | 7 | GEORGES | 19.8 | 74.3 | 65 | 994  |
| 1998 | 9 24 | 0  | 7 | GEORGES | 20.5 | 74.9 | 65 | 992  |
| 1998 | 9 24 | 6  | 7 | GEORGES | 20.8 | 76.0 | 65 | 991  |
| 1998 | 9 24 | 12 | 7 | GEORGES | 21.3 | 77.2 | 70 | 990  |
| 1998 | 9 24 | 18 | 7 | GEORGES | 21.9 | 78.0 | 75 | 989  |
| 1998 | 9 25 | 0  | 7 | GEORGES | 22.7 | 79.0 | 80 | 987  |
| 1998 | 9 25 | 6  | 7 | GEORGES | 23.4 | 80.2 | 85 | 986  |
| 1998 | 9 25 | 12 | 7 | GEORGES | 23.9 | 81.3 | 90 | 982  |
| 1998 | 9 25 | 18 | 7 | GEORGES | 24.6 | 82.4 | 90 | 975  |
| 1998 | 9 26 | 0  | 7 | GEORGES | 24.8 | 83.3 | 90 | 974  |
| 1998 | 9 26 | 6  | 7 | GEORGES | 25.2 | 84.2 | 90 | 975  |
| 1998 | 9 26 | 12 | 7 | GEORGES | 25.7 | 85.1 | 90 | 974  |
| 1998 | 9 26 | 18 | 7 | GEORGES | 26.2 | 85.9 | 90 | 975  |
| 1998 | 9 27 | 0  | 7 | GEORGES | 27.0 | 86.5 | 95 | 969  |
| 1998 | 9 27 | 6  | 7 | GEORGES | 27.6 | 87.2 | 95 | 970  |
| 1998 | 9 27 | 12 | 7 | GEORGES | 28.2 | 87.8 | 95 | 962  |
| 1998 | 9 27 | 18 | 7 | GEORGES | 28.8 | 88.3 | 95 | 962  |
| 1998 | 9 28 | 0  | 7 | GEORGES | 29.3 | 88.5 | 95 | 961  |
| 1998 | 9 28 | 6  | 7 | GEORGES | 29.8 | 88.7 | 90 | 964  |
| 1998 | 9 28 | 12 | 7 | GEORGES | 30.4 | 88.9 | 90 | 965  |
| 1998 | 9 28 | 18 | 7 | GEORGES | 30.6 | 88.9 | 65 | 984  |
| 1998 | 9 29 | 0  | 7 | GEORGES | 30.6 | 89.0 | 50 | 986  |
| 1998 | 9 29 | 6  | 7 | GEORGES | 30.6 | 88.4 | 40 | 992  |
| 1998 | 9 29 | 12 | 7 | GEORGES | 31.0 | 88.1 | 30 | 994  |
| 1998 | 9 29 | 18 | 7 | GEORGES | 30.9 | 87.5 | 30 | 996  |
| 1998 | 9 30 | 0  | 7 | GEORGES | 30.8 | 86.9 | 30 | 998  |
| 1998 | 9 30 | 6  | 7 | GEORGES | 30.7 | 86.3 | 30 | 1000 |
| 1998 | 9 30 | 12 | 7 | GEORGES | 30.7 | 85.4 | 25 | 1002 |
| 1998 | 9 30 | 18 | 7 | GEORGES | 30.6 | 84.2 | 25 | 1004 |
| 1998 | 10 1 | 0  | 7 | GEORGES | 30.5 | 83.0 | 25 | 1006 |
| 1998 | 10 1 | 6  | 7 | GEORGES | 30.5 | 81.8 | 20 | 1008 |
| 1998 | 9 17 | 12 | 8 | HERMINE | 26.9 | 90.3 | 30 | 1001 |
| 1998 | 9 17 | 18 | 8 | HERMINE | 26.8 | 91.6 | 30 | 1001 |
| 1998 | 9 18 | 0  | 8 | HERMINE | 26.4 | 92.1 | 30 | 1000 |
| 1998 | 9 18 | 6  | 8 | HERMINE | 25.7 | 92.5 | 30 | 999  |
| 1998 | 9 18 | 12 | 8 | HERMINE | 26.0 | 92.5 | 30 | 999  |
| 1998 | 9 18 | 18 | 8 | HERMINE | 25.9 | 92.3 | 30 | 1000 |
| 1998 | 9 19 | 0  | 8 | HERMINE | 25.8 | 92.0 | 30 | 1001 |
| 1998 | 9 19 | 6  | 8 | HERMINE | 26.4 | 91.4 | 30 | 1001 |
| 1998 | 9 19 | 12 | 8 | HERMINE | 27.5 | 91.3 | 35 | 1001 |
| 1998 | 9 19 | 18 | 8 | HERMINE | 28.3 | 91.1 | 40 | 1000 |
| 1998 | 9 20 | 0  | 8 | HERMINE | 29.0 | 90.9 | 40 | 999  |

|      |      |       |         |      |      |         |
|------|------|-------|---------|------|------|---------|
| 1998 | 9 20 | 6 8   | HERMINE | 29.2 | 90.9 | 35 1001 |
| 1998 | 9 20 | 12 8  | HERMINE | 30.5 | 90.5 | 30 1002 |
| 1998 | 9 20 | 18 8  | HERMINE | 31.0 | 90.0 | 20 1003 |
| 1998 | 9 19 | 0 9   | IVAN    | 13.4 | 26.6 | 25 1010 |
| 1998 | 9 19 | 6 9   | IVAN    | 13.1 | 27.5 | 25 1010 |
| 1998 | 9 19 | 12 9  | IVAN    | 12.9 | 28.2 | 25 1010 |
| 1998 | 9 19 | 18 9  | IVAN    | 13.1 | 29.0 | 25 1010 |
| 1998 | 9 20 | 0 9   | IVAN    | 13.4 | 29.6 | 30 1009 |
| 1998 | 9 20 | 6 9   | IVAN    | 14.3 | 30.6 | 30 1009 |
| 1998 | 9 20 | 12 9  | IVAN    | 15.2 | 31.5 | 30 1008 |
| 1998 | 9 20 | 18 9  | IVAN    | 16.0 | 32.6 | 35 1006 |
| 1998 | 9 21 | 0 9   | IVAN    | 16.8 | 33.7 | 35 1005 |
| 1998 | 9 21 | 6 9   | IVAN    | 17.4 | 34.9 | 35 1003 |
| 1998 | 9 21 | 12 9  | IVAN    | 18.2 | 35.6 | 35 1003 |
| 1998 | 9 21 | 18 9  | IVAN    | 19.0 | 36.0 | 40 1002 |
| 1998 | 9 22 | 0 9   | IVAN    | 20.0 | 36.1 | 40 1001 |
| 1998 | 9 22 | 6 9   | IVAN    | 21.3 | 36.1 | 45 1000 |
| 1998 | 9 22 | 12 9  | IVAN    | 22.9 | 36.4 | 45 997  |
| 1998 | 9 22 | 18 9  | IVAN    | 24.2 | 37.1 | 55 994  |
| 1998 | 9 23 | 0 9   | IVAN    | 25.6 | 37.7 | 50 996  |
| 1998 | 9 23 | 6 9   | IVAN    | 26.9 | 38.4 | 45 997  |
| 1998 | 9 23 | 12 9  | IVAN    | 28.3 | 39.2 | 55 990  |
| 1998 | 9 23 | 18 9  | IVAN    | 29.6 | 40.2 | 65 987  |
| 1998 | 9 24 | 0 9   | IVAN    | 30.5 | 40.9 | 65 986  |
| 1998 | 9 24 | 6 9   | IVAN    | 31.3 | 41.6 | 70 985  |
| 1998 | 9 24 | 12 9  | IVAN    | 32.3 | 42.0 | 70 985  |
| 1998 | 9 24 | 18 9  | IVAN    | 33.4 | 42.3 | 70 985  |
| 1998 | 9 25 | 0 9   | IVAN    | 34.4 | 42.3 | 70 984  |
| 1998 | 9 25 | 6 9   | IVAN    | 35.3 | 41.9 | 70 984  |
| 1998 | 9 25 | 12 9  | IVAN    | 36.3 | 41.3 | 70 984  |
| 1998 | 9 25 | 18 9  | IVAN    | 37.2 | 40.2 | 75 983  |
| 1998 | 9 26 | 0 9   | IVAN    | 38.1 | 38.7 | 75 980  |
| 1998 | 9 26 | 6 9   | IVAN    | 39.2 | 36.3 | 80 975  |
| 1998 | 9 26 | 12 9  | IVAN    | 40.1 | 33.1 | 75 977  |
| 1998 | 9 26 | 18 9  | IVAN    | 40.7 | 29.7 | 75 982  |
| 1998 | 9 27 | 0 9   | IVAN    | 40.7 | 25.7 | 60 994  |
| 1998 | 9 27 | 6 9   | IVAN    | 40.9 | 22.7 | 50 997  |
| 1998 | 9 27 | 12 9  | IVAN    | 41.3 | 19.2 | 45 1000 |
| 1998 | 9 27 | 18 9  | IVAN    | 41.5 | 15.5 | 40 1002 |
| 1998 | 9 21 | 6 10  | JEANNE  | 9.6  | 17.4 | 30 1008 |
| 1998 | 9 21 | 12 10 | JEANNE  | 10.5 | 18.2 | 30 1006 |
| 1998 | 9 21 | 18 10 | JEANNE  | 11.0 | 19.4 | 35 1004 |
| 1998 | 9 22 | 0 10  | JEANNE  | 11.5 | 20.7 | 40 1002 |
| 1998 | 9 22 | 6 10  | JEANNE  | 12.1 | 22.2 | 45 1000 |

|      |    |    |    |    |        |      |      |    |      |
|------|----|----|----|----|--------|------|------|----|------|
| 1998 | 9  | 22 | 12 | 10 | JEANNE | 12.7 | 23.8 | 55 | 994  |
| 1998 | 9  | 22 | 18 | 10 | JEANNE | 13.1 | 25.2 | 65 | 987  |
| 1998 | 9  | 23 | 0  | 10 | JEANNE | 13.6 | 26.7 | 70 | 983  |
| 1998 | 9  | 23 | 6  | 10 | JEANNE | 14.1 | 28.1 | 75 | 980  |
| 1998 | 9  | 23 | 12 | 10 | JEANNE | 14.5 | 29.5 | 80 | 975  |
| 1998 | 9  | 23 | 18 | 10 | JEANNE | 15.0 | 30.8 | 85 | 973  |
| 1998 | 9  | 24 | 0  | 10 | JEANNE | 15.4 | 32.1 | 85 | 972  |
| 1998 | 9  | 24 | 6  | 10 | JEANNE | 15.9 | 33.4 | 90 | 971  |
| 1998 | 9  | 24 | 12 | 10 | JEANNE | 16.4 | 34.4 | 90 | 970  |
| 1998 | 9  | 24 | 18 | 10 | JEANNE | 17.0 | 35.4 | 90 | 969  |
| 1998 | 9  | 25 | 0  | 10 | JEANNE | 17.5 | 36.3 | 90 | 971  |
| 1998 | 9  | 25 | 6  | 10 | JEANNE | 18.0 | 37.2 | 90 | 973  |
| 1998 | 9  | 25 | 12 | 10 | JEANNE | 18.6 | 37.9 | 85 | 975  |
| 1998 | 9  | 25 | 18 | 10 | JEANNE | 19.3 | 38.6 | 80 | 977  |
| 1998 | 9  | 26 | 0  | 10 | JEANNE | 20.0 | 39.4 | 75 | 979  |
| 1998 | 9  | 26 | 6  | 10 | JEANNE | 20.8 | 40.0 | 70 | 983  |
| 1998 | 9  | 26 | 12 | 10 | JEANNE | 21.6 | 40.6 | 70 | 983  |
| 1998 | 9  | 26 | 18 | 10 | JEANNE | 22.4 | 41.2 | 75 | 980  |
| 1998 | 9  | 27 | 0  | 10 | JEANNE | 23.4 | 41.6 | 75 | 980  |
| 1998 | 9  | 27 | 6  | 10 | JEANNE | 24.4 | 42.0 | 70 | 983  |
| 1998 | 9  | 27 | 12 | 10 | JEANNE | 25.6 | 41.8 | 70 | 983  |
| 1998 | 9  | 27 | 18 | 10 | JEANNE | 27.1 | 41.5 | 70 | 983  |
| 1998 | 9  | 28 | 0  | 10 | JEANNE | 28.8 | 41.2 | 70 | 983  |
| 1998 | 9  | 28 | 6  | 10 | JEANNE | 30.6 | 40.7 | 70 | 983  |
| 1998 | 9  | 28 | 12 | 10 | JEANNE | 32.3 | 39.6 | 75 | 980  |
| 1998 | 9  | 28 | 18 | 10 | JEANNE | 33.8 | 38.4 | 80 | 977  |
| 1998 | 9  | 29 | 0  | 10 | JEANNE | 35.0 | 37.2 | 80 | 977  |
| 1998 | 9  | 29 | 6  | 10 | JEANNE | 35.8 | 36.2 | 75 | 980  |
| 1998 | 9  | 29 | 12 | 10 | JEANNE | 36.2 | 35.3 | 65 | 985  |
| 1998 | 9  | 29 | 18 | 10 | JEANNE | 36.6 | 34.6 | 60 | 990  |
| 1998 | 9  | 30 | 0  | 10 | JEANNE | 36.9 | 33.4 | 50 | 997  |
| 1998 | 9  | 30 | 6  | 10 | JEANNE | 37.2 | 32.1 | 45 | 1000 |
| 1998 | 9  | 30 | 12 | 10 | JEANNE | 37.6 | 30.7 | 40 | 1002 |
| 1998 | 9  | 30 | 18 | 10 | JEANNE | 38.0 | 29.4 | 35 | 1006 |
| 1998 | 10 | 1  | 0  | 10 | JEANNE | 38.2 | 28.0 | 30 | 1008 |
| 1998 | 10 | 1  | 6  | 10 | JEANNE | 38.3 | 26.3 | 30 | 1008 |
| 1998 | 10 | 1  | 12 | 10 | JEANNE | 38.5 | 24.5 | 35 | 1006 |
| 1998 | 10 | 1  | 18 | 10 | JEANNE | 38.7 | 22.5 | 35 | 1005 |
| 1998 | 10 | 2  | 0  | 10 | JEANNE | 38.8 | 21.0 | 35 | 1003 |
| 1998 | 10 | 2  | 6  | 10 | JEANNE | 38.9 | 19.5 | 35 | 1003 |
| 1998 | 10 | 2  | 12 | 10 | JEANNE | 39.0 | 18.2 | 40 | 1003 |
| 1998 | 10 | 2  | 18 | 10 | JEANNE | 39.0 | 16.8 | 40 | 1003 |
| 1998 | 10 | 3  | 0  | 10 | JEANNE | 39.0 | 15.5 | 40 | 1003 |
| 1998 | 10 | 3  | 6  | 10 | JEANNE | 39.0 | 14.3 | 40 | 1003 |

|         |            |        |      |      |         |
|---------|------------|--------|------|------|---------|
| 1998 10 | 3 12 10    | JEANNE | 39.0 | 13.0 | 40 1003 |
| 1998 10 | 3 18 10    | JEANNE | 39.0 | 11.0 | 35 1003 |
| 1998 10 | 4 0 10     | JEANNE | 39.1 | 9.0  | 30 1003 |
| 1998 10 | 4 6 10     | JEANNE | 39.3 | 7.0  | 30 1004 |
| 1998 10 | 4 12 10    | JEANNE | 39.5 | 5.0  | 25 1004 |
| 1998    | 9 23 12 11 | KARL   | 33.3 | 65.4 | 25 1003 |
| 1998    | 9 23 18 11 | KARL   | 33.2 | 62.8 | 30 1004 |
| 1998    | 9 24 0 11  | KARL   | 33.2 | 60.7 | 35 1003 |
| 1998    | 9 24 6 11  | KARL   | 32.9 | 59.2 | 35 1002 |
| 1998    | 9 24 12 11 | KARL   | 32.5 | 58.1 | 40 1001 |
| 1998    | 9 24 18 11 | KARL   | 32.0 | 57.2 | 45 1000 |
| 1998    | 9 25 0 11  | KARL   | 31.4 | 56.2 | 50 998  |
| 1998    | 9 25 6 11  | KARL   | 30.8 | 55.1 | 55 994  |
| 1998    | 9 25 12 11 | KARL   | 30.4 | 54.0 | 65 987  |
| 1998    | 9 25 18 11 | KARL   | 30.3 | 52.9 | 70 984  |
| 1998    | 9 26 0 11  | KARL   | 30.5 | 51.8 | 75 981  |
| 1998    | 9 26 6 11  | KARL   | 31.1 | 51.0 | 75 979  |
| 1998    | 9 26 12 11 | KARL   | 31.8 | 49.9 | 75 977  |
| 1998    | 9 26 18 11 | KARL   | 32.6 | 48.8 | 80 973  |
| 1998    | 9 27 0 11  | KARL   | 33.9 | 47.3 | 90 970  |
| 1998    | 9 27 6 11  | KARL   | 35.5 | 45.2 | 90 970  |
| 1998    | 9 27 12 11 | KARL   | 37.4 | 42.5 | 80 973  |
| 1998    | 9 27 18 11 | KARL   | 39.1 | 39.0 | 70 983  |
| 1998    | 9 28 0 11  | KARL   | 40.4 | 34.7 | 55 994  |
| 1998    | 9 28 6 11  | KARL   | 41.5 | 30.0 | 40 1002 |
| 1998    | 9 28 12 11 | KARL   | 42.0 | 25.0 | 35 1001 |
| 1998    | 9 28 18 11 | KARL   | 43.0 | 20.0 | 35 1000 |
| 1998    | 9 29 0 11  | KARL   | 46.0 | 16.0 | 35 996  |
| 1998    | 9 29 6 11  | KARL   | 48.0 | 14.0 | 35 994  |
| 1998    | 9 29 12 11 | KARL   | 49.0 | 11.0 | 35 994  |
| 1998    | 9 29 18 11 | KARL   | 49.0 | 8.0  | 35 991  |
| 1998 10 | 5 0 12     | LISA   | 13.9 | 46.4 | 30 1008 |
| 1998 10 | 5 6 12     | LISA   | 14.2 | 47.1 | 35 1007 |
| 1998 10 | 5 12 12    | LISA   | 14.8 | 47.8 | 35 1007 |
| 1998 10 | 5 18 12    | LISA   | 15.7 | 48.5 | 40 1006 |
| 1998 10 | 6 0 12     | LISA   | 16.5 | 49.2 | 40 1006 |
| 1998 10 | 6 6 12     | LISA   | 17.1 | 49.3 | 45 1005 |
| 1998 10 | 6 12 12    | LISA   | 17.6 | 48.9 | 45 1005 |
| 1998 10 | 6 18 12    | LISA   | 18.2 | 48.5 | 45 1005 |
| 1998 10 | 7 0 12     | LISA   | 18.9 | 48.0 | 50 1004 |
| 1998 10 | 7 6 12     | LISA   | 19.6 | 47.5 | 50 1003 |
| 1998 10 | 7 12 12    | LISA   | 20.4 | 46.6 | 50 1002 |
| 1998 10 | 7 18 12    | LISA   | 21.5 | 45.3 | 50 1001 |
| 1998 10 | 8 0 12     | LISA   | 22.9 | 43.9 | 55 1000 |

|                        |      |      |     |      |
|------------------------|------|------|-----|------|
| 1998 10 8 6 12 LISA    | 24.6 | 42.1 | 55  | 999  |
| 1998 10 8 12 12 LISA   | 26.9 | 40.1 | 55  | 999  |
| 1998 10 8 18 12 LISA   | 29.6 | 38.6 | 60  | 999  |
| 1998 10 9 0 12 LISA    | 32.9 | 37.8 | 60  | 999  |
| 1998 10 9 6 12 LISA    | 36.8 | 37.9 | 60  | 997  |
| 1998 10 9 12 12 LISA   | 41.6 | 38.7 | 65  | 995  |
| 1998 10 9 18 12 LISA   | 47.1 | 39.3 | 65  | 997  |
| 1998 10 10 0 12 LISA   | 52.1 | 32.0 | 60  | 999  |
| 1998 10 22 0 13 MITCH  | 11.6 | 76.1 | 30  | 1002 |
| 1998 10 22 6 13 MITCH  | 11.9 | 77.1 | 30  | 1002 |
| 1998 10 22 12 13 MITCH | 12.0 | 77.9 | 30  | 1002 |
| 1998 10 22 18 13 MITCH | 11.6 | 77.9 | 35  | 1001 |
| 1998 10 23 0 13 MITCH  | 11.8 | 77.6 | 40  | 1000 |
| 1998 10 23 6 13 MITCH  | 12.2 | 77.6 | 45  | 999  |
| 1998 10 23 12 13 MITCH | 12.5 | 77.8 | 45  | 999  |
| 1998 10 23 18 13 MITCH | 12.9 | 78.0 | 50  | 998  |
| 1998 10 24 0 13 MITCH  | 13.4 | 77.9 | 55  | 997  |
| 1998 10 24 6 13 MITCH  | 13.9 | 77.8 | 65  | 990  |
| 1998 10 24 12 13 MITCH | 14.5 | 77.9 | 75  | 985  |
| 1998 10 24 18 13 MITCH | 15.0 | 78.1 | 90  | 980  |
| 1998 10 25 0 13 MITCH  | 15.5 | 78.4 | 100 | 965  |
| 1998 10 25 6 13 MITCH  | 16.0 | 78.9 | 105 | 951  |
| 1998 10 25 12 13 MITCH | 16.2 | 79.6 | 115 | 945  |
| 1998 10 25 18 13 MITCH | 16.4 | 80.3 | 125 | 926  |
| 1998 10 26 0 13 MITCH  | 16.4 | 81.0 | 130 | 923  |
| 1998 10 26 6 13 MITCH  | 16.4 | 81.8 | 135 | 922  |
| 1998 10 26 12 13 MITCH | 16.6 | 82.6 | 145 | 914  |
| 1998 10 26 18 13 MITCH | 16.9 | 83.1 | 155 | 905  |
| 1998 10 27 0 13 MITCH  | 17.2 | 83.8 | 155 | 910  |
| 1998 10 27 6 13 MITCH  | 17.3 | 84.4 | 150 | 917  |
| 1998 10 27 12 13 MITCH | 17.1 | 85.0 | 150 | 922  |
| 1998 10 27 18 13 MITCH | 16.9 | 85.4 | 145 | 928  |
| 1998 10 28 0 13 MITCH  | 16.6 | 85.6 | 140 | 933  |
| 1998 10 28 6 13 MITCH  | 16.3 | 85.6 | 130 | 938  |
| 1998 10 28 12 13 MITCH | 16.3 | 85.6 | 115 | 948  |
| 1998 10 28 18 13 MITCH | 16.3 | 85.7 | 95  | 959  |
| 1998 10 29 0 13 MITCH  | 16.2 | 85.8 | 85  | 970  |
| 1998 10 29 6 13 MITCH  | 16.1 | 85.8 | 75  | 979  |
| 1998 10 29 12 13 MITCH | 15.9 | 85.7 | 70  | 987  |
| 1998 10 29 18 13 MITCH | 15.8 | 85.6 | 60  | 994  |
| 1998 10 30 0 13 MITCH  | 15.6 | 85.7 | 55  | 995  |
| 1998 10 30 6 13 MITCH  | 15.4 | 85.9 | 50  | 996  |
| 1998 10 30 12 13 MITCH | 15.2 | 86.1 | 45  | 997  |
| 1998 10 30 18 13 MITCH | 14.9 | 86.5 | 45  | 998  |

|            |         |        |      |      |    |      |
|------------|---------|--------|------|------|----|------|
| 1998 10 31 | 0 13    | MITCH  | 14.7 | 87.0 | 45 | 999  |
| 1998 10 31 | 6 13    | MITCH  | 14.5 | 87.7 | 40 | 1000 |
| 1998 10 31 | 12 13   | MITCH  | 14.5 | 88.5 | 35 | 1000 |
| 1998 10 31 | 18 13   | MITCH  | 14.6 | 89.2 | 30 | 1001 |
| 1998 11    | 1 0 13  | MITCH  | 14.6 | 90.0 | 30 | 1002 |
| 1998 11    | 1 6 13  | MITCH  | 14.7 | 90.8 | 25 | 1003 |
| 1998 11    | 1 12 13 | MITCH  | 14.9 | 91.5 | 25 | 1005 |
| 1998 11    | 1 18 13 | MITCH  | 15.5 | 92.2 | 25 | 1005 |
| 1998 11    | 2 0 13  | MITCH  | 16.3 | 92.7 | 20 | 1005 |
| 1998 11    | 2 6 13  | MITCH  | 17.1 | 93.1 | 20 | 1005 |
| 1998 11    | 2 12 13 | MITCH  | 17.9 | 93.4 | 20 | 1005 |
| 1998 11    | 2 18 13 | MITCH  | 18.7 | 93.7 | 20 | 1005 |
| 1998 11    | 3 0 13  | MITCH  | 19.2 | 93.4 | 20 | 1003 |
| 1998 11    | 3 6 13  | MITCH  | 19.3 | 92.7 | 20 | 1003 |
| 1998 11    | 3 12 13 | MITCH  | 19.4 | 92.1 | 25 | 1002 |
| 1998 11    | 3 18 13 | MITCH  | 19.6 | 91.4 | 40 | 997  |
| 1998 11    | 4 0 13  | MITCH  | 20.0 | 90.6 | 35 | 997  |
| 1998 11    | 4 6 13  | MITCH  | 20.8 | 89.6 | 30 | 998  |
| 1998 11    | 4 12 13 | MITCH  | 21.8 | 88.2 | 40 | 998  |
| 1998 11    | 4 18 13 | MITCH  | 23.3 | 86.5 | 40 | 993  |
| 1998 11    | 5 0 13  | MITCH  | 24.8 | 84.8 | 45 | 993  |
| 1998 11    | 5 6 13  | MITCH  | 25.6 | 83.1 | 50 | 990  |
| 1998 11    | 5 12 13 | MITCH  | 26.6 | 81.3 | 55 | 987  |
| 1998 11    | 5 18 13 | MITCH  | 27.5 | 78.3 | 50 | 992  |
| 1998 11    | 6 0 13  | MITCH  | 30.0 | 75.0 | 50 | 993  |
| 1998 11    | 6 6 13  | MITCH  | 32.5 | 72.0 | 50 | 992  |
| 1998 11    | 6 12 13 | MITCH  | 35.0 | 68.0 | 50 | 990  |
| 1998 11    | 6 18 13 | MITCH  | 37.0 | 63.0 | 50 | 989  |
| 1998 11    | 7 0 13  | MITCH  | 39.0 | 58.0 | 50 | 990  |
| 1998 11    | 7 6 13  | MITCH  | 41.0 | 53.0 | 50 | 992  |
| 1998 11    | 7 12 13 | MITCH  | 42.5 | 47.5 | 50 | 986  |
| 1998 11    | 7 18 13 | MITCH  | 44.5 | 42.0 | 60 | 972  |
| 1998 11    | 8 0 13  | MITCH  | 46.5 | 36.5 | 60 | 974  |
| 1998 11    | 8 6 13  | MITCH  | 48.5 | 31.0 | 60 | 972  |
| 1998 11    | 8 12 13 | MITCH  | 50.0 | 25.0 | 60 | 962  |
| 1998 11    | 8 18 13 | MITCH  | 53.5 | 20.5 | 60 | 956  |
| 1998 11    | 9 0 13  | MITCH  | 55.5 | 14.5 | 60 | 956  |
| 1998 11    | 9 6 13  | MITCH  | 58.0 | 10.5 | 60 | 956  |
| 1998 11    | 9 12 13 | MITCH  | 61.0 | 10.0 | 60 | 956  |
| 1998 11    | 9 18 13 | MITCH  | 63.5 | 5.0  | 55 | 960  |
| 1998 11 24 | 0 14    | NICOLE | 28.3 | 28.0 | 30 | 1010 |
| 1998 11 24 | 6 14    | NICOLE | 27.9 | 29.1 | 35 | 1005 |
| 1998 11 24 | 12 14   | NICOLE | 27.5 | 30.1 | 45 | 1000 |
| 1998 11 24 | 18 14   | NICOLE | 27.2 | 31.1 | 60 | 997  |



|              |       |        |      |      |    |      |
|--------------|-------|--------|------|------|----|------|
| 1998 11 25   | 0 14  | NICOLE | 26.9 | 32.0 | 60 | 995  |
| 1998 11 25   | 6 14  | NICOLE | 26.6 | 32.9 | 60 | 994  |
| 1998 11 25   | 12 14 | NICOLE | 26.3 | 33.7 | 55 | 994  |
| 1998 11 25   | 18 14 | NICOLE | 26.0 | 34.6 | 50 | 994  |
| 1998 11 26   | 0 14  | NICOLE | 25.7 | 35.4 | 40 | 998  |
| 1998 11 26   | 6 14  | NICOLE | 25.5 | 36.4 | 35 | 1000 |
| 1998 11 26   | 12 14 | NICOLE | 25.3 | 37.3 | 30 | 1007 |
| 1998 11 26   | 18 14 | NICOLE | 25.2 | 38.3 | 25 | 1009 |
| 1998 11 27   | 0 14  | NICOLE | 25.2 | 39.2 | 25 | 1009 |
| 1998 11 27   | 6 14  | NICOLE | 25.3 | 40.3 | 25 | 1009 |
| 1998 11 27   | 12 14 | NICOLE | 25.4 | 41.7 | 30 | 1009 |
| 1998 11 27   | 18 14 | NICOLE | 25.6 | 43.0 | 40 | 1005 |
| 1998 11 28   | 0 14  | NICOLE | 25.8 | 44.1 | 50 | 1001 |
| 1998 11 28   | 6 14  | NICOLE | 26.3 | 45.3 | 50 | 1000 |
| 1998 11 28   | 12 14 | NICOLE | 27.1 | 46.2 | 50 | 1000 |
| 1998 11 28   | 18 14 | NICOLE | 28.0 | 46.6 | 50 | 1000 |
| 1998 11 29   | 0 14  | NICOLE | 28.8 | 46.5 | 45 | 1000 |
| 1998 11 29   | 6 14  | NICOLE | 30.0 | 45.9 | 45 | 1000 |
| 1998 11 29   | 12 14 | NICOLE | 31.0 | 44.9 | 55 | 1000 |
| 1998 11 29   | 18 14 | NICOLE | 31.8 | 43.8 | 60 | 995  |
| 1998 11 30   | 0 14  | NICOLE | 32.6 | 42.6 | 65 | 992  |
| 1998 11 30   | 6 14  | NICOLE | 33.1 | 41.7 | 65 | 992  |
| 1998 11 30   | 12 14 | NICOLE | 33.8 | 40.5 | 65 | 987  |
| 1998 11 30   | 18 14 | NICOLE | 34.3 | 39.3 | 70 | 984  |
| 1998 12 1    | 0 14  | NICOLE | 35.1 | 37.9 | 75 | 979  |
| 1998 12 1    | 6 14  | NICOLE | 37.0 | 35.5 | 70 | 980  |
| 1998 12 1    | 12 14 | NICOLE | 40.4 | 34.0 | 60 | 982  |
| 1998 12 1    | 18 14 | NICOLE | 43.0 | 34.0 | 60 | 985  |
| 1998 12 2    | 0 14  | NICOLE | 47.0 | 34.5 | 50 | 988  |
| 1998 12 2    | 6 14  | NICOLE | 49.5 | 35.5 | 50 | 990  |
| 1998 12 2    | 12 14 | NICOLE | 52.0 | 37.0 | 50 | 990  |
| 1999 6 11 18 | 1     | ARLENE | 27.1 | 58.1 | 30 | 1010 |
| 1999 6 12 0  | 1     | ARLENE | 27.7 | 57.4 | 30 | 1010 |
| 1999 6 12 6  | 1     | ARLENE | 28.1 | 57.3 | 30 | 1010 |
| 1999 6 12 12 | 1     | ARLENE | 28.3 | 57.3 | 35 | 1009 |
| 1999 6 12 18 | 1     | ARLENE | 28.5 | 57.4 | 45 | 1008 |
| 1999 6 13 0  | 1     | ARLENE | 28.8 | 57.5 | 50 | 1006 |
| 1999 6 13 6  | 1     | ARLENE | 29.0 | 57.8 | 50 | 1006 |
| 1999 6 13 12 | 1     | ARLENE | 29.1 | 58.2 | 50 | 1007 |
| 1999 6 13 18 | 1     | ARLENE | 29.1 | 58.7 | 50 | 1007 |
| 1999 6 14 0  | 1     | ARLENE | 29.1 | 59.2 | 45 | 1008 |
| 1999 6 14 6  | 1     | ARLENE | 29.2 | 59.8 | 40 | 1009 |
| 1999 6 14 12 | 1     | ARLENE | 29.3 | 60.4 | 40 | 1009 |
| 1999 6 14 18 | 1     | ARLENE | 29.6 | 60.7 | 40 | 1009 |

|      |      |    |   |        |      |       |     |      |
|------|------|----|---|--------|------|-------|-----|------|
| 1999 | 6 15 | 0  | 1 | ARLENE | 29.8 | 61.1  | 40  | 1009 |
| 1999 | 6 15 | 6  | 1 | ARLENE | 29.7 | 61.5  | 40  | 1009 |
| 1999 | 6 15 | 12 | 1 | ARLENE | 29.6 | 61.3  | 45  | 1008 |
| 1999 | 6 15 | 18 | 1 | ARLENE | 29.9 | 61.4  | 45  | 1009 |
| 1999 | 6 16 | 0  | 1 | ARLENE | 30.0 | 61.7  | 45  | 1009 |
| 1999 | 6 16 | 6  | 1 | ARLENE | 30.3 | 62.0  | 45  | 1010 |
| 1999 | 6 16 | 12 | 1 | ARLENE | 30.8 | 62.3  | 40  | 1010 |
| 1999 | 6 16 | 18 | 1 | ARLENE | 31.3 | 62.5  | 35  | 1012 |
| 1999 | 6 17 | 0  | 1 | ARLENE | 31.8 | 62.8  | 30  | 1014 |
| 1999 | 6 17 | 6  | 1 | ARLENE | 32.5 | 63.0  | 30  | 1015 |
| 1999 | 6 17 | 12 | 1 | ARLENE | 33.4 | 63.0  | 30  | 1015 |
| 1999 | 6 17 | 18 | 1 | ARLENE | 34.4 | 62.3  | 30  | 1015 |
| 1999 | 6 18 | 0  | 1 | ARLENE | 35.4 | 61.6  | 25  | 1015 |
| 1999 | 8 18 | 18 | 2 | BRET   | 19.5 | 94.4  | 30  | 1010 |
| 1999 | 8 19 | 0  | 2 | BRET   | 19.5 | 94.5  | 30  | 1008 |
| 1999 | 8 19 | 6  | 2 | BRET   | 19.6 | 94.6  | 30  | 1008 |
| 1999 | 8 19 | 12 | 2 | BRET   | 19.7 | 94.6  | 30  | 1008 |
| 1999 | 8 19 | 18 | 2 | BRET   | 19.8 | 94.7  | 35  | 1005 |
| 1999 | 8 20 | 0  | 2 | BRET   | 19.8 | 94.7  | 40  | 1000 |
| 1999 | 8 20 | 6  | 2 | BRET   | 20.0 | 94.6  | 45  | 998  |
| 1999 | 8 20 | 12 | 2 | BRET   | 20.4 | 94.5  | 50  | 993  |
| 1999 | 8 20 | 18 | 2 | BRET   | 21.2 | 94.4  | 55  | 991  |
| 1999 | 8 21 | 0  | 2 | BRET   | 21.9 | 94.5  | 65  | 983  |
| 1999 | 8 21 | 6  | 2 | BRET   | 22.5 | 94.7  | 75  | 980  |
| 1999 | 8 21 | 12 | 2 | BRET   | 23.1 | 94.9  | 80  | 979  |
| 1999 | 8 21 | 18 | 2 | BRET   | 23.8 | 95.0  | 90  | 975  |
| 1999 | 8 22 | 0  | 2 | BRET   | 24.7 | 95.1  | 120 | 954  |
| 1999 | 8 22 | 6  | 2 | BRET   | 25.5 | 95.5  | 125 | 950  |
| 1999 | 8 22 | 12 | 2 | BRET   | 26.2 | 96.1  | 125 | 944  |
| 1999 | 8 22 | 18 | 2 | BRET   | 26.6 | 96.8  | 120 | 946  |
| 1999 | 8 23 | 0  | 2 | BRET   | 26.9 | 97.4  | 100 | 951  |
| 1999 | 8 23 | 6  | 2 | BRET   | 27.0 | 97.9  | 80  | 963  |
| 1999 | 8 23 | 12 | 2 | BRET   | 27.3 | 98.3  | 60  | 980  |
| 1999 | 8 23 | 18 | 2 | BRET   | 27.6 | 98.8  | 35  | 993  |
| 1999 | 8 24 | 0  | 2 | BRET   | 28.0 | 99.5  | 30  | 1000 |
| 1999 | 8 24 | 6  | 2 | BRET   | 28.0 | 100.4 | 30  | 1003 |
| 1999 | 8 24 | 12 | 2 | BRET   | 27.8 | 101.3 | 25  | 1006 |
| 1999 | 8 24 | 18 | 2 | BRET   | 27.7 | 102.1 | 25  | 1007 |
| 1999 | 8 25 | 0  | 2 | BRET   | 27.6 | 103.0 | 20  | 1008 |
| 1999 | 8 19 | 0  | 3 | CINDY  | 13.5 | 18.9  | 30  | 1003 |
| 1999 | 8 19 | 6  | 3 | CINDY  | 13.8 | 20.3  | 30  | 1003 |
| 1999 | 8 19 | 12 | 3 | CINDY  | 13.9 | 21.5  | 30  | 1003 |
| 1999 | 8 19 | 18 | 3 | CINDY  | 13.8 | 22.5  | 30  | 1003 |
| 1999 | 8 20 | 0  | 3 | CINDY  | 13.7 | 23.4  | 30  | 1002 |

|      |      |    |   |       |      |      |     |      |
|------|------|----|---|-------|------|------|-----|------|
| 1999 | 8 20 | 6  | 3 | CINDY | 13.6 | 24.3 | 30  | 1002 |
| 1999 | 8 20 | 12 | 3 | CINDY | 13.5 | 25.4 | 30  | 1002 |
| 1999 | 8 20 | 18 | 3 | CINDY | 13.6 | 26.6 | 35  | 1001 |
| 1999 | 8 21 | 0  | 3 | CINDY | 13.6 | 27.7 | 40  | 1000 |
| 1999 | 8 21 | 6  | 3 | CINDY | 13.8 | 28.8 | 50  | 997  |
| 1999 | 8 21 | 12 | 3 | CINDY | 13.9 | 29.7 | 55  | 994  |
| 1999 | 8 21 | 18 | 3 | CINDY | 14.1 | 30.8 | 60  | 990  |
| 1999 | 8 22 | 0  | 3 | CINDY | 14.2 | 31.7 | 65  | 987  |
| 1999 | 8 22 | 6  | 3 | CINDY | 14.4 | 32.3 | 65  | 987  |
| 1999 | 8 22 | 12 | 3 | CINDY | 14.5 | 32.7 | 65  | 987  |
| 1999 | 8 22 | 18 | 3 | CINDY | 14.6 | 33.1 | 60  | 990  |
| 1999 | 8 23 | 0  | 3 | CINDY | 14.9 | 33.9 | 50  | 997  |
| 1999 | 8 23 | 6  | 3 | CINDY | 15.3 | 34.9 | 50  | 997  |
| 1999 | 8 23 | 12 | 3 | CINDY | 15.7 | 35.9 | 50  | 997  |
| 1999 | 8 23 | 18 | 3 | CINDY | 16.1 | 36.9 | 50  | 997  |
| 1999 | 8 24 | 0  | 3 | CINDY | 16.6 | 38.0 | 50  | 997  |
| 1999 | 8 24 | 6  | 3 | CINDY | 16.9 | 39.2 | 50  | 997  |
| 1999 | 8 24 | 12 | 3 | CINDY | 17.2 | 40.6 | 50  | 997  |
| 1999 | 8 24 | 18 | 3 | CINDY | 17.5 | 42.2 | 50  | 997  |
| 1999 | 8 25 | 0  | 3 | CINDY | 17.8 | 43.6 | 55  | 994  |
| 1999 | 8 25 | 6  | 3 | CINDY | 18.4 | 44.8 | 55  | 994  |
| 1999 | 8 25 | 12 | 3 | CINDY | 19.3 | 45.9 | 55  | 994  |
| 1999 | 8 25 | 18 | 3 | CINDY | 20.4 | 47.1 | 60  | 990  |
| 1999 | 8 26 | 0  | 3 | CINDY | 21.7 | 48.2 | 65  | 987  |
| 1999 | 8 26 | 6  | 3 | CINDY | 22.9 | 49.5 | 65  | 987  |
| 1999 | 8 26 | 12 | 3 | CINDY | 24.2 | 50.8 | 65  | 987  |
| 1999 | 8 26 | 18 | 3 | CINDY | 25.4 | 52.0 | 70  | 984  |
| 1999 | 8 27 | 0  | 3 | CINDY | 26.4 | 53.1 | 80  | 978  |
| 1999 | 8 27 | 6  | 3 | CINDY | 27.2 | 54.3 | 80  | 978  |
| 1999 | 8 27 | 12 | 3 | CINDY | 27.8 | 55.4 | 90  | 970  |
| 1999 | 8 27 | 18 | 3 | CINDY | 28.3 | 56.2 | 90  | 970  |
| 1999 | 8 28 | 0  | 3 | CINDY | 28.7 | 56.9 | 100 | 961  |
| 1999 | 8 28 | 6  | 3 | CINDY | 29.3 | 57.5 | 115 | 948  |
| 1999 | 8 28 | 12 | 3 | CINDY | 30.1 | 58.0 | 120 | 942  |
| 1999 | 8 28 | 18 | 3 | CINDY | 30.8 | 58.5 | 120 | 943  |
| 1999 | 8 29 | 0  | 3 | CINDY | 31.5 | 58.4 | 120 | 944  |
| 1999 | 8 29 | 6  | 3 | CINDY | 32.3 | 58.4 | 115 | 948  |
| 1999 | 8 29 | 12 | 3 | CINDY | 33.1 | 58.2 | 100 | 961  |
| 1999 | 8 29 | 18 | 3 | CINDY | 33.8 | 57.4 | 95  | 965  |
| 1999 | 8 30 | 0  | 3 | CINDY | 34.3 | 56.3 | 90  | 970  |
| 1999 | 8 30 | 6  | 3 | CINDY | 34.7 | 55.5 | 90  | 970  |
| 1999 | 8 30 | 12 | 3 | CINDY | 35.3 | 54.9 | 80  | 978  |
| 1999 | 8 30 | 18 | 3 | CINDY | 36.1 | 54.2 | 80  | 978  |
| 1999 | 8 31 | 0  | 3 | CINDY | 37.0 | 52.6 | 70  | 984  |

|      |      |      |        |      |      |    |      |
|------|------|------|--------|------|------|----|------|
| 1999 | 8 31 | 6 3  | CINDY  | 38.2 | 50.6 | 60 | 990  |
| 1999 | 8 31 | 12 3 | CINDY  | 40.4 | 48.2 | 50 | 997  |
| 1999 | 8 24 | 0 4  | DENNIS | 21.5 | 67.7 | 30 | 1009 |
| 1999 | 8 24 | 6 4  | DENNIS | 22.0 | 68.9 | 30 | 1009 |
| 1999 | 8 24 | 12 4 | DENNIS | 22.4 | 70.0 | 35 | 1009 |
| 1999 | 8 24 | 18 4 | DENNIS | 22.7 | 70.9 | 40 | 1009 |
| 1999 | 8 25 | 0 4  | DENNIS | 22.8 | 71.5 | 40 | 1008 |
| 1999 | 8 25 | 6 4  | DENNIS | 23.0 | 71.9 | 40 | 1007 |
| 1999 | 8 25 | 12 4 | DENNIS | 23.2 | 72.1 | 45 | 1004 |
| 1999 | 8 25 | 18 4 | DENNIS | 23.4 | 72.3 | 55 | 1000 |
| 1999 | 8 26 | 0 4  | DENNIS | 23.6 | 72.5 | 60 | 998  |
| 1999 | 8 26 | 6 4  | DENNIS | 23.8 | 73.1 | 65 | 995  |
| 1999 | 8 26 | 12 4 | DENNIS | 24.1 | 73.6 | 65 | 995  |
| 1999 | 8 26 | 18 4 | DENNIS | 24.4 | 74.0 | 70 | 990  |
| 1999 | 8 27 | 0 4  | DENNIS | 24.8 | 74.4 | 65 | 993  |
| 1999 | 8 27 | 6 4  | DENNIS | 25.2 | 75.0 | 65 | 988  |
| 1999 | 8 27 | 12 4 | DENNIS | 25.6 | 75.5 | 65 | 988  |
| 1999 | 8 27 | 18 4 | DENNIS | 25.9 | 75.9 | 65 | 987  |
| 1999 | 8 28 | 0 4  | DENNIS | 26.1 | 76.2 | 70 | 982  |
| 1999 | 8 28 | 6 4  | DENNIS | 26.5 | 76.7 | 75 | 976  |
| 1999 | 8 28 | 12 4 | DENNIS | 27.1 | 77.0 | 85 | 973  |
| 1999 | 8 28 | 18 4 | DENNIS | 27.7 | 77.3 | 90 | 969  |
| 1999 | 8 29 | 0 4  | DENNIS | 28.3 | 77.7 | 90 | 969  |
| 1999 | 8 29 | 6 4  | DENNIS | 29.0 | 77.9 | 90 | 970  |
| 1999 | 8 29 | 12 4 | DENNIS | 29.9 | 78.4 | 90 | 971  |
| 1999 | 8 29 | 18 4 | DENNIS | 30.8 | 78.4 | 90 | 967  |
| 1999 | 8 30 | 0 4  | DENNIS | 31.9 | 78.1 | 90 | 964  |
| 1999 | 8 30 | 6 4  | DENNIS | 32.8 | 77.6 | 90 | 962  |
| 1999 | 8 30 | 12 4 | DENNIS | 33.6 | 76.5 | 85 | 965  |
| 1999 | 8 30 | 18 4 | DENNIS | 34.3 | 74.8 | 85 | 966  |
| 1999 | 8 31 | 0 4  | DENNIS | 34.9 | 73.6 | 80 | 971  |
| 1999 | 8 31 | 6 4  | DENNIS | 35.1 | 72.9 | 80 | 977  |
| 1999 | 8 31 | 12 4 | DENNIS | 35.2 | 72.8 | 75 | 983  |
| 1999 | 8 31 | 18 4 | DENNIS | 35.1 | 73.3 | 70 | 984  |
| 1999 | 9 1  | 0 4  | DENNIS | 35.2 | 73.6 | 60 | 986  |
| 1999 | 9 1  | 6 4  | DENNIS | 35.0 | 73.4 | 55 | 987  |
| 1999 | 9 1  | 12 4 | DENNIS | 35.4 | 73.5 | 50 | 989  |
| 1999 | 9 1  | 18 4 | DENNIS | 35.5 | 73.8 | 50 | 988  |
| 1999 | 9 2  | 0 4  | DENNIS | 35.4 | 73.7 | 50 | 988  |
| 1999 | 9 2  | 6 4  | DENNIS | 35.2 | 73.6 | 45 | 989  |
| 1999 | 9 2  | 12 4 | DENNIS | 35.1 | 73.7 | 45 | 989  |
| 1999 | 9 2  | 18 4 | DENNIS | 34.8 | 73.9 | 45 | 990  |
| 1999 | 9 3  | 0 4  | DENNIS | 34.2 | 74.0 | 45 | 989  |
| 1999 | 9 3  | 6 4  | DENNIS | 33.6 | 74.1 | 45 | 989  |

|      |   |    |    |          |      |      |    |      |
|------|---|----|----|----------|------|------|----|------|
| 1999 | 9 | 3  | 12 | 4 DENNIS | 33.2 | 73.9 | 45 | 988  |
| 1999 | 9 | 3  | 18 | 4 DENNIS | 33.0 | 73.8 | 50 | 987  |
| 1999 | 9 | 4  | 0  | 4 DENNIS | 33.1 | 74.0 | 50 | 987  |
| 1999 | 9 | 4  | 6  | 4 DENNIS | 33.3 | 74.5 | 55 | 986  |
| 1999 | 9 | 4  | 12 | 4 DENNIS | 33.9 | 75.3 | 55 | 986  |
| 1999 | 9 | 4  | 18 | 4 DENNIS | 34.5 | 76.0 | 60 | 986  |
| 1999 | 9 | 5  | 0  | 4 DENNIS | 35.0 | 76.8 | 50 | 985  |
| 1999 | 9 | 5  | 6  | 4 DENNIS | 35.5 | 77.7 | 35 | 989  |
| 1999 | 9 | 5  | 12 | 4 DENNIS | 36.1 | 78.8 | 30 | 994  |
| 1999 | 9 | 5  | 18 | 4 DENNIS | 36.2 | 79.4 | 25 | 998  |
| 1999 | 9 | 6  | 0  | 4 DENNIS | 36.2 | 79.9 | 25 | 1000 |
| 1999 | 9 | 6  | 6  | 4 DENNIS | 36.4 | 80.1 | 20 | 1004 |
| 1999 | 9 | 6  | 12 | 4 DENNIS | 37.0 | 79.9 | 20 | 1005 |
| 1999 | 9 | 6  | 18 | 4 DENNIS | 37.7 | 79.5 | 20 | 1008 |
| 1999 | 9 | 7  | 0  | 4 DENNIS | 38.5 | 78.5 | 20 | 1009 |
| 1999 | 9 | 7  | 6  | 4 DENNIS | 40.8 | 77.0 | 20 | 1008 |
| 1999 | 9 | 7  | 12 | 4 DENNIS | 42.7 | 77.7 | 20 | 1007 |
| 1999 | 9 | 7  | 18 | 4 DENNIS | 43.5 | 77.7 | 20 | 1006 |
| 1999 | 9 | 8  | 0  | 4 DENNIS | 43.5 | 76.5 | 20 | 1006 |
| 1999 | 9 | 8  | 6  | 4 DENNIS | 44.0 | 75.8 | 20 | 1006 |
| 1999 | 9 | 8  | 12 | 4 DENNIS | 44.9 | 74.8 | 20 | 1006 |
| 1999 | 9 | 8  | 18 | 4 DENNIS | 45.5 | 75.6 | 20 | 1005 |
| 1999 | 8 | 24 | 6  | 5 EMILY  | 11.5 | 53.6 | 30 | 1007 |
| 1999 | 8 | 24 | 12 | 5 EMILY  | 11.5 | 53.8 | 35 | 1006 |
| 1999 | 8 | 24 | 18 | 5 EMILY  | 11.6 | 53.9 | 45 | 1004 |
| 1999 | 8 | 25 | 0  | 5 EMILY  | 12.1 | 53.9 | 45 | 1005 |
| 1999 | 8 | 25 | 6  | 5 EMILY  | 12.6 | 54.2 | 40 | 1006 |
| 1999 | 8 | 25 | 12 | 5 EMILY  | 12.8 | 54.8 | 40 | 1007 |
| 1999 | 8 | 25 | 18 | 5 EMILY  | 13.2 | 55.2 | 40 | 1005 |
| 1999 | 8 | 26 | 0  | 5 EMILY  | 13.8 | 55.7 | 40 | 1005 |
| 1999 | 8 | 26 | 6  | 5 EMILY  | 14.3 | 56.2 | 40 | 1007 |
| 1999 | 8 | 26 | 12 | 5 EMILY  | 15.0 | 56.6 | 40 | 1010 |
| 1999 | 8 | 26 | 18 | 5 EMILY  | 15.8 | 57.0 | 35 | 1010 |
| 1999 | 8 | 27 | 0  | 5 EMILY  | 17.0 | 57.1 | 35 | 1010 |
| 1999 | 8 | 27 | 6  | 5 EMILY  | 18.0 | 57.0 | 35 | 1011 |
| 1999 | 8 | 27 | 12 | 5 EMILY  | 19.0 | 57.0 | 35 | 1009 |
| 1999 | 8 | 27 | 18 | 5 EMILY  | 20.0 | 57.0 | 40 | 1007 |
| 1999 | 8 | 28 | 0  | 5 EMILY  | 21.1 | 56.6 | 40 | 1007 |
| 1999 | 8 | 28 | 6  | 5 EMILY  | 22.4 | 56.7 | 35 | 1009 |
| 1999 | 8 | 28 | 12 | 5 EMILY  | 23.8 | 56.7 | 30 | 1009 |
| 1999 | 9 | 7  | 18 | 6 FLOYD  | 14.6 | 45.6 | 25 | 1008 |
| 1999 | 9 | 8  | 0  | 6 FLOYD  | 15.0 | 46.9 | 30 | 1007 |
| 1999 | 9 | 8  | 6  | 6 FLOYD  | 15.3 | 48.2 | 35 | 1005 |
| 1999 | 9 | 8  | 12 | 6 FLOYD  | 15.8 | 49.6 | 40 | 1003 |

|      |   |    |    |         |      |      |     |      |
|------|---|----|----|---------|------|------|-----|------|
| 1999 | 9 | 8  | 18 | 6 FLOYD | 16.3 | 51.1 | 45  | 1000 |
| 1999 | 9 | 9  | 0  | 6 FLOYD | 16.7 | 52.6 | 45  | 1000 |
| 1999 | 9 | 9  | 6  | 6 FLOYD | 17.1 | 53.9 | 45  | 1003 |
| 1999 | 9 | 9  | 12 | 6 FLOYD | 17.3 | 55.1 | 50  | 1003 |
| 1999 | 9 | 9  | 18 | 6 FLOYD | 17.9 | 56.3 | 60  | 996  |
| 1999 | 9 | 10 | 0  | 6 FLOYD | 18.3 | 57.2 | 60  | 995  |
| 1999 | 9 | 10 | 6  | 6 FLOYD | 18.6 | 58.2 | 60  | 990  |
| 1999 | 9 | 10 | 12 | 6 FLOYD | 19.3 | 58.8 | 70  | 989  |
| 1999 | 9 | 10 | 18 | 6 FLOYD | 20.2 | 59.6 | 70  | 975  |
| 1999 | 9 | 11 | 0  | 6 FLOYD | 20.8 | 60.4 | 80  | 971  |
| 1999 | 9 | 11 | 6  | 6 FLOYD | 21.4 | 61.1 | 95  | 963  |
| 1999 | 9 | 11 | 12 | 6 FLOYD | 21.9 | 62.0 | 95  | 962  |
| 1999 | 9 | 11 | 18 | 6 FLOYD | 22.5 | 63.0 | 90  | 966  |
| 1999 | 9 | 12 | 0  | 6 FLOYD | 22.7 | 64.1 | 85  | 967  |
| 1999 | 9 | 12 | 6  | 6 FLOYD | 22.8 | 65.2 | 95  | 960  |
| 1999 | 9 | 12 | 12 | 6 FLOYD | 23.0 | 66.2 | 105 | 955  |
| 1999 | 9 | 12 | 18 | 6 FLOYD | 23.2 | 67.4 | 115 | 940  |
| 1999 | 9 | 13 | 0  | 6 FLOYD | 23.4 | 68.7 | 125 | 931  |
| 1999 | 9 | 13 | 6  | 6 FLOYD | 23.6 | 70.0 | 135 | 922  |
| 1999 | 9 | 13 | 12 | 6 FLOYD | 23.9 | 71.4 | 135 | 921  |
| 1999 | 9 | 13 | 18 | 6 FLOYD | 24.1 | 72.9 | 125 | 923  |
| 1999 | 9 | 14 | 0  | 6 FLOYD | 24.5 | 74.0 | 115 | 924  |
| 1999 | 9 | 14 | 6  | 6 FLOYD | 24.9 | 75.3 | 105 | 927  |
| 1999 | 9 | 14 | 12 | 6 FLOYD | 25.4 | 76.3 | 105 | 930  |
| 1999 | 9 | 14 | 18 | 6 FLOYD | 26.1 | 77.0 | 110 | 930  |
| 1999 | 9 | 15 | 0  | 6 FLOYD | 27.1 | 77.7 | 115 | 933  |
| 1999 | 9 | 15 | 6  | 6 FLOYD | 28.2 | 78.5 | 110 | 935  |
| 1999 | 9 | 15 | 12 | 6 FLOYD | 29.3 | 78.9 | 100 | 943  |
| 1999 | 9 | 15 | 18 | 6 FLOYD | 30.6 | 79.1 | 95  | 947  |
| 1999 | 9 | 16 | 0  | 6 FLOYD | 32.1 | 78.7 | 90  | 950  |
| 1999 | 9 | 16 | 6  | 6 FLOYD | 33.7 | 78.0 | 90  | 956  |
| 1999 | 9 | 16 | 12 | 6 FLOYD | 35.7 | 76.8 | 70  | 967  |
| 1999 | 9 | 16 | 18 | 6 FLOYD | 38.0 | 75.3 | 60  | 974  |
| 1999 | 9 | 17 | 0  | 6 FLOYD | 40.6 | 73.5 | 50  | 980  |
| 1999 | 9 | 17 | 6  | 6 FLOYD | 42.1 | 72.1 | 50  | 983  |
| 1999 | 9 | 17 | 12 | 6 FLOYD | 43.3 | 70.6 | 45  | 984  |
| 1999 | 9 | 17 | 18 | 6 FLOYD | 44.2 | 68.9 | 45  | 985  |
| 1999 | 9 | 18 | 0  | 6 FLOYD | 44.8 | 67.3 | 40  | 987  |
| 1999 | 9 | 18 | 6  | 6 FLOYD | 45.4 | 65.5 | 35  | 990  |
| 1999 | 9 | 18 | 12 | 6 FLOYD | 46.6 | 63.0 | 35  | 992  |
| 1999 | 9 | 18 | 18 | 6 FLOYD | 47.7 | 59.3 | 35  | 992  |
| 1999 | 9 | 19 | 0  | 6 FLOYD | 48.0 | 56.3 | 35  | 992  |
| 1999 | 9 | 19 | 6  | 6 FLOYD | 48.5 | 52.5 | 35  | 994  |
| 1999 | 9 | 19 | 12 | 6 FLOYD | 49.5 | 48.0 | 40  | 992  |

|      |         |        |      |      |         |
|------|---------|--------|------|------|---------|
| 1999 | 9 11 12 | 7 GERT | 12.6 | 24.2 | 30 1006 |
| 1999 | 9 11 18 | 7 GERT | 12.9 | 26.1 | 30 1005 |
| 1999 | 9 12 0  | 7 GERT | 13.3 | 28.0 | 30 1006 |
| 1999 | 9 12 6  | 7 GERT | 13.8 | 29.8 | 30 1005 |
| 1999 | 9 12 12 | 7 GERT | 14.2 | 31.9 | 35 1001 |
| 1999 | 9 12 18 | 7 GERT | 14.8 | 33.8 | 45 997  |
| 1999 | 9 13 0  | 7 GERT | 15.1 | 35.6 | 55 995  |
| 1999 | 9 13 6  | 7 GERT | 15.4 | 37.3 | 60 990  |
| 1999 | 9 13 12 | 7 GERT | 15.9 | 39.2 | 65 984  |
| 1999 | 9 13 18 | 7 GERT | 16.1 | 40.8 | 70 979  |
| 1999 | 9 14 0  | 7 GERT | 16.3 | 42.2 | 75 976  |
| 1999 | 9 14 6  | 7 GERT | 16.6 | 43.5 | 85 973  |
| 1999 | 9 14 12 | 7 GERT | 16.8 | 44.6 | 90 968  |
| 1999 | 9 14 18 | 7 GERT | 17.1 | 45.8 | 95 962  |
| 1999 | 9 15 0  | 7 GERT | 17.2 | 46.9 | 100 955 |
| 1999 | 9 15 6  | 7 GERT | 17.4 | 47.9 | 110 948 |
| 1999 | 9 15 12 | 7 GERT | 17.5 | 48.9 | 115 940 |
| 1999 | 9 15 18 | 7 GERT | 17.7 | 50.0 | 125 933 |
| 1999 | 9 16 0  | 7 GERT | 17.8 | 50.8 | 130 930 |
| 1999 | 9 16 6  | 7 GERT | 18.0 | 51.7 | 130 933 |
| 1999 | 9 16 12 | 7 GERT | 18.2 | 52.6 | 125 941 |
| 1999 | 9 16 18 | 7 GERT | 18.6 | 53.4 | 120 940 |
| 1999 | 9 17 0  | 7 GERT | 19.0 | 54.2 | 115 944 |
| 1999 | 9 17 6  | 7 GERT | 19.4 | 55.0 | 125 942 |
| 1999 | 9 17 12 | 7 GERT | 19.9 | 55.7 | 125 945 |
| 1999 | 9 17 18 | 7 GERT | 20.4 | 56.3 | 115 950 |
| 1999 | 9 18 0  | 7 GERT | 20.9 | 56.8 | 110 953 |
| 1999 | 9 18 6  | 7 GERT | 21.6 | 57.1 | 105 954 |
| 1999 | 9 18 12 | 7 GERT | 22.2 | 57.4 | 105 953 |
| 1999 | 9 18 18 | 7 GERT | 22.8 | 57.8 | 105 950 |
| 1999 | 9 19 0  | 7 GERT | 23.4 | 58.1 | 110 947 |
| 1999 | 9 19 6  | 7 GERT | 24.1 | 58.7 | 115 946 |
| 1999 | 9 19 12 | 7 GERT | 24.7 | 59.2 | 115 946 |
| 1999 | 9 19 18 | 7 GERT | 25.5 | 60.0 | 115 946 |
| 1999 | 9 20 0  | 7 GERT | 26.2 | 60.7 | 115 947 |
| 1999 | 9 20 6  | 7 GERT | 26.8 | 61.4 | 110 947 |
| 1999 | 9 20 12 | 7 GERT | 27.6 | 62.4 | 105 948 |
| 1999 | 9 20 18 | 7 GERT | 28.3 | 62.7 | 100 949 |
| 1999 | 9 21 0  | 7 GERT | 29.2 | 62.9 | 95 950  |
| 1999 | 9 21 6  | 7 GERT | 30.1 | 62.8 | 90 952  |
| 1999 | 9 21 12 | 7 GERT | 31.3 | 62.6 | 85 955  |
| 1999 | 9 21 18 | 7 GERT | 32.7 | 62.1 | 80 958  |
| 1999 | 9 22 0  | 7 GERT | 34.3 | 61.2 | 75 960  |
| 1999 | 9 22 6  | 7 GERT | 36.2 | 60.4 | 75 961  |

|      |          |          |      |      |    |      |
|------|----------|----------|------|------|----|------|
| 1999 | 9 22 12  | 7 GERT   | 38.1 | 59.4 | 70 | 962  |
| 1999 | 9 22 18  | 7 GERT   | 40.3 | 57.9 | 65 | 963  |
| 1999 | 9 23 0   | 7 GERT   | 42.2 | 55.6 | 60 | 964  |
| 1999 | 9 23 6   | 7 GERT   | 44.6 | 54.5 | 60 | 968  |
| 1999 | 9 23 12  | 7 GERT   | 46.6 | 51.9 | 60 | 972  |
| 1999 | 9 19 6   | 8 HARVEY | 25.0 | 87.8 | 30 | 1005 |
| 1999 | 9 19 12  | 8 HARVEY | 25.5 | 87.8 | 30 | 1004 |
| 1999 | 9 19 18  | 8 HARVEY | 26.0 | 87.8 | 30 | 1003 |
| 1999 | 9 20 0   | 8 HARVEY | 26.3 | 87.4 | 40 | 1002 |
| 1999 | 9 20 6   | 8 HARVEY | 26.6 | 86.9 | 40 | 1001 |
| 1999 | 9 20 12  | 8 HARVEY | 27.0 | 86.3 | 40 | 998  |
| 1999 | 9 20 18  | 8 HARVEY | 27.0 | 85.5 | 50 | 998  |
| 1999 | 9 21 0   | 8 HARVEY | 27.1 | 84.6 | 50 | 995  |
| 1999 | 9 21 6   | 8 HARVEY | 26.5 | 83.9 | 50 | 995  |
| 1999 | 9 21 12  | 8 HARVEY | 26.0 | 82.8 | 50 | 996  |
| 1999 | 9 21 18  | 8 HARVEY | 25.9 | 81.5 | 50 | 999  |
| 1999 | 9 22 0   | 8 HARVEY | 26.9 | 78.6 | 40 | 1000 |
| 1999 | 10 12 12 | 9 IRENE  | 15.9 | 82.0 | 20 | 1006 |
| 1999 | 10 12 18 | 9 IRENE  | 16.4 | 83.0 | 20 | 1006 |
| 1999 | 10 13 0  | 9 IRENE  | 16.7 | 83.2 | 20 | 1005 |
| 1999 | 10 13 6  | 9 IRENE  | 17.3 | 83.3 | 30 | 1004 |
| 1999 | 10 13 12 | 9 IRENE  | 18.5 | 83.4 | 35 | 1003 |
| 1999 | 10 13 18 | 9 IRENE  | 19.8 | 83.6 | 45 | 1001 |
| 1999 | 10 14 0  | 9 IRENE  | 20.7 | 83.6 | 55 | 999  |
| 1999 | 10 14 6  | 9 IRENE  | 21.0 | 83.6 | 60 | 999  |
| 1999 | 10 14 12 | 9 IRENE  | 21.3 | 82.9 | 60 | 997  |
| 1999 | 10 14 18 | 9 IRENE  | 22.4 | 82.4 | 60 | 995  |
| 1999 | 10 15 0  | 9 IRENE  | 23.1 | 82.6 | 60 | 988  |
| 1999 | 10 15 6  | 9 IRENE  | 23.8 | 82.2 | 65 | 988  |
| 1999 | 10 15 12 | 9 IRENE  | 24.4 | 81.8 | 65 | 987  |
| 1999 | 10 15 18 | 9 IRENE  | 25.1 | 81.3 | 65 | 986  |
| 1999 | 10 16 0  | 9 IRENE  | 26.1 | 80.6 | 65 | 986  |
| 1999 | 10 16 6  | 9 IRENE  | 27.0 | 80.2 | 65 | 985  |
| 1999 | 10 16 12 | 9 IRENE  | 27.8 | 80.1 | 65 | 982  |
| 1999 | 10 16 18 | 9 IRENE  | 28.6 | 79.9 | 65 | 984  |
| 1999 | 10 17 0  | 9 IRENE  | 29.4 | 79.8 | 65 | 984  |
| 1999 | 10 17 6  | 9 IRENE  | 30.2 | 79.8 | 65 | 985  |
| 1999 | 10 17 12 | 9 IRENE  | 31.2 | 79.7 | 65 | 984  |
| 1999 | 10 17 18 | 9 IRENE  | 32.2 | 79.0 | 70 | 978  |
| 1999 | 10 18 0  | 9 IRENE  | 33.4 | 77.4 | 80 | 976  |
| 1999 | 10 18 6  | 9 IRENE  | 34.8 | 75.2 | 95 | 964  |
| 1999 | 10 18 12 | 9 IRENE  | 36.8 | 71.6 | 90 | 960  |
| 1999 | 10 18 18 | 9 IRENE  | 39.0 | 67.4 | 80 | 968  |
| 1999 | 10 19 0  | 9 IRENE  | 41.5 | 61.0 | 80 | 968  |



|                          |      |      |    |      |
|--------------------------|------|------|----|------|
| 1999 10 19 6 9 IRENE     | 44.9 | 51.5 | 80 | 968  |
| 1999 10 19 12 9 IRENE    | 48.0 | 48.0 | 80 | 968  |
| 1999 10 19 18 9 IRENE    | 51.0 | 45.0 | 80 | 968  |
| 1999 10 17 18 10 JOSE    | 9.8  | 50.8 | 25 | 1006 |
| 1999 10 18 0 10 JOSE     | 10.3 | 51.8 | 30 | 1005 |
| 1999 10 18 6 10 JOSE     | 10.9 | 52.8 | 35 | 1004 |
| 1999 10 18 12 10 JOSE    | 11.5 | 53.9 | 40 | 1003 |
| 1999 10 18 18 10 JOSE    | 12.2 | 55.1 | 40 | 1002 |
| 1999 10 19 0 10 JOSE     | 12.9 | 56.1 | 45 | 1000 |
| 1999 10 19 6 10 JOSE     | 13.5 | 57.1 | 55 | 994  |
| 1999 10 19 12 10 JOSE    | 14.1 | 58.1 | 60 | 994  |
| 1999 10 19 18 10 JOSE    | 14.9 | 58.9 | 65 | 992  |
| 1999 10 20 0 10 JOSE     | 15.7 | 59.5 | 70 | 987  |
| 1999 10 20 6 10 JOSE     | 16.3 | 60.2 | 80 | 979  |
| 1999 10 20 12 10 JOSE    | 16.8 | 61.1 | 85 | 980  |
| 1999 10 20 18 10 JOSE    | 17.2 | 62.0 | 80 | 983  |
| 1999 10 21 0 10 JOSE     | 17.6 | 62.7 | 75 | 990  |
| 1999 10 21 6 10 JOSE     | 18.1 | 63.8 | 65 | 992  |
| 1999 10 21 12 10 JOSE    | 18.5 | 64.8 | 60 | 996  |
| 1999 10 21 18 10 JOSE    | 19.0 | 65.3 | 55 | 994  |
| 1999 10 22 0 10 JOSE     | 19.4 | 65.8 | 50 | 993  |
| 1999 10 22 6 10 JOSE     | 19.9 | 66.1 | 50 | 992  |
| 1999 10 22 12 10 JOSE    | 20.5 | 65.9 | 50 | 992  |
| 1999 10 22 18 10 JOSE    | 21.1 | 65.6 | 50 | 993  |
| 1999 10 23 0 10 JOSE     | 22.0 | 65.2 | 50 | 994  |
| 1999 10 23 6 10 JOSE     | 23.0 | 64.8 | 50 | 995  |
| 1999 10 23 12 10 JOSE    | 24.0 | 64.3 | 55 | 995  |
| 1999 10 23 18 10 JOSE    | 25.2 | 63.8 | 55 | 995  |
| 1999 10 24 0 10 JOSE     | 26.6 | 63.1 | 55 | 995  |
| 1999 10 24 6 10 JOSE     | 28.0 | 62.2 | 60 | 990  |
| 1999 10 24 12 10 JOSE    | 29.7 | 61.1 | 65 | 987  |
| 1999 10 24 18 10 JOSE    | 32.2 | 59.8 | 65 | 987  |
| 1999 10 25 0 10 JOSE     | 34.9 | 58.1 | 60 | 990  |
| 1999 10 25 6 10 JOSE     | 37.9 | 55.8 | 55 | 994  |
| 1999 10 25 12 10 JOSE    | 40.0 | 51.8 | 50 | 996  |
| 1999 10 28 18 11 KATRINA | 11.4 | 80.9 | 30 | 1001 |
| 1999 10 29 0 11 KATRINA  | 11.6 | 81.6 | 30 | 1001 |
| 1999 10 29 6 11 KATRINA  | 12.0 | 82.0 | 30 | 1001 |
| 1999 10 29 12 11 KATRINA | 12.6 | 82.6 | 30 | 1000 |
| 1999 10 29 18 11 KATRINA | 13.2 | 82.9 | 35 | 1000 |
| 1999 10 30 0 11 KATRINA  | 13.8 | 83.4 | 35 | 999  |
| 1999 10 30 6 11 KATRINA  | 14.1 | 84.0 | 30 | 1000 |
| 1999 10 30 12 11 KATRINA | 14.3 | 84.5 | 25 | 1001 |
| 1999 10 30 18 11 KATRINA | 14.7 | 85.2 | 25 | 1003 |

|            |       |         |      |      |     |      |
|------------|-------|---------|------|------|-----|------|
| 1999 10 31 | 0 11  | KATRINA | 16.0 | 86.6 | 25  | 1005 |
| 1999 10 31 | 6 11  | KATRINA | 17.2 | 87.4 | 25  | 1007 |
| 1999 10 31 | 12 11 | KATRINA | 18.4 | 88.0 | 25  | 1008 |
| 1999 10 31 | 18 11 | KATRINA | 19.4 | 88.7 | 25  | 1009 |
| 1999 11 1  | 0 11  | KATRINA | 19.9 | 89.6 | 20  | 1010 |
| 1999 11 1  | 6 11  | KATRINA | 20.4 | 89.8 | 20  | 1011 |
| 1999 11 1  | 12 11 | KATRINA | 21.2 | 89.8 | 20  | 1011 |
| 1999 11 13 | 18 12 | LENNY   | 16.7 | 81.6 | 30  | 1003 |
| 1999 11 14 | 0 12  | LENNY   | 16.5 | 81.1 | 30  | 1003 |
| 1999 11 14 | 6 12  | LENNY   | 16.4 | 80.5 | 30  | 1002 |
| 1999 11 14 | 12 12 | LENNY   | 16.4 | 79.9 | 40  | 1000 |
| 1999 11 14 | 18 12 | LENNY   | 16.3 | 79.3 | 55  | 992  |
| 1999 11 15 | 0 12  | LENNY   | 16.0 | 78.6 | 70  | 988  |
| 1999 11 15 | 6 12  | LENNY   | 15.5 | 77.7 | 75  | 977  |
| 1999 11 15 | 12 12 | LENNY   | 15.1 | 76.4 | 85  | 971  |
| 1999 11 15 | 18 12 | LENNY   | 14.8 | 74.8 | 75  | 983  |
| 1999 11 16 | 0 12  | LENNY   | 15.1 | 73.4 | 75  | 982  |
| 1999 11 16 | 6 12  | LENNY   | 15.1 | 72.0 | 75  | 974  |
| 1999 11 16 | 12 12 | LENNY   | 15.1 | 70.5 | 85  | 971  |
| 1999 11 16 | 18 12 | LENNY   | 15.5 | 69.0 | 85  | 967  |
| 1999 11 17 | 0 12  | LENNY   | 15.9 | 67.6 | 100 | 959  |
| 1999 11 17 | 6 12  | LENNY   | 16.4 | 66.5 | 105 | 952  |
| 1999 11 17 | 12 12 | LENNY   | 16.8 | 65.5 | 115 | 946  |
| 1999 11 17 | 18 12 | LENNY   | 17.4 | 64.8 | 135 | 933  |
| 1999 11 18 | 0 12  | LENNY   | 17.6 | 64.2 | 130 | 940  |
| 1999 11 18 | 6 12  | LENNY   | 17.8 | 63.9 | 125 | 944  |
| 1999 11 18 | 12 12 | LENNY   | 17.9 | 63.6 | 120 | 953  |
| 1999 11 18 | 18 12 | LENNY   | 18.0 | 63.3 | 110 | 966  |
| 1999 11 19 | 0 12  | LENNY   | 18.1 | 63.1 | 85  | 975  |
| 1999 11 19 | 6 12  | LENNY   | 18.0 | 62.9 | 75  | 979  |
| 1999 11 19 | 12 12 | LENNY   | 17.9 | 62.8 | 70  | 986  |
| 1999 11 19 | 18 12 | LENNY   | 17.6 | 62.5 | 60  | 994  |
| 1999 11 20 | 0 12  | LENNY   | 17.3 | 61.8 | 55  | 994  |
| 1999 11 20 | 6 12  | LENNY   | 17.0 | 61.1 | 55  | 995  |
| 1999 11 20 | 12 12 | LENNY   | 16.5 | 60.4 | 50  | 996  |
| 1999 11 20 | 18 12 | LENNY   | 15.9 | 59.8 | 45  | 998  |
| 1999 11 21 | 0 12  | LENNY   | 16.0 | 59.0 | 40  | 998  |
| 1999 11 21 | 6 12  | LENNY   | 16.5 | 58.1 | 30  | 998  |
| 1999 11 21 | 12 12 | LENNY   | 17.2 | 57.1 | 30  | 999  |
| 1999 11 21 | 18 12 | LENNY   | 18.0 | 56.7 | 25  | 1000 |
| 1999 11 22 | 0 12  | LENNY   | 18.4 | 56.1 | 25  | 1001 |
| 1999 11 22 | 6 12  | LENNY   | 18.5 | 55.7 | 25  | 1002 |
| 1999 11 22 | 12 12 | LENNY   | 18.5 | 55.3 | 25  | 1004 |
| 1999 11 22 | 18 12 | LENNY   | 18.5 | 54.7 | 20  | 1005 |

|      |    |    |    |    |         |      |      |     |      |
|------|----|----|----|----|---------|------|------|-----|------|
| 1999 | 11 | 23 | 0  | 12 | LENNY   | 18.5 | 53.8 | 20  | 1006 |
| 1999 | 11 | 23 | 6  | 12 | LENNY   | 18.5 | 52.8 | 20  | 1006 |
| 2000 | 8  | 3  | 18 | 1  | ALBERTO | 10.8 | 18.0 | 25  | 1007 |
| 2000 | 8  | 4  | 0  | 1  | ALBERTO | 11.5 | 20.1 | 30  | 1005 |
| 2000 | 8  | 4  | 6  | 1  | ALBERTO | 12.0 | 22.3 | 35  | 1004 |
| 2000 | 8  | 4  | 12 | 1  | ALBERTO | 12.3 | 23.8 | 35  | 1003 |
| 2000 | 8  | 4  | 18 | 1  | ALBERTO | 12.7 | 25.2 | 40  | 1002 |
| 2000 | 8  | 5  | 0  | 1  | ALBERTO | 13.2 | 26.7 | 40  | 1001 |
| 2000 | 8  | 5  | 6  | 1  | ALBERTO | 13.7 | 28.2 | 45  | 1000 |
| 2000 | 8  | 5  | 12 | 1  | ALBERTO | 14.1 | 29.8 | 45  | 999  |
| 2000 | 8  | 5  | 18 | 1  | ALBERTO | 14.5 | 31.4 | 55  | 994  |
| 2000 | 8  | 6  | 0  | 1  | ALBERTO | 14.5 | 33.2 | 65  | 987  |
| 2000 | 8  | 6  | 6  | 1  | ALBERTO | 14.6 | 34.4 | 65  | 985  |
| 2000 | 8  | 6  | 12 | 1  | ALBERTO | 14.7 | 35.4 | 70  | 983  |
| 2000 | 8  | 6  | 18 | 1  | ALBERTO | 15.2 | 36.6 | 75  | 981  |
| 2000 | 8  | 7  | 0  | 1  | ALBERTO | 15.7 | 38.1 | 75  | 979  |
| 2000 | 8  | 7  | 6  | 1  | ALBERTO | 16.0 | 39.6 | 80  | 978  |
| 2000 | 8  | 7  | 12 | 1  | ALBERTO | 16.2 | 41.0 | 80  | 977  |
| 2000 | 8  | 7  | 18 | 1  | ALBERTO | 16.5 | 42.2 | 80  | 978  |
| 2000 | 8  | 8  | 0  | 1  | ALBERTO | 16.7 | 43.6 | 75  | 979  |
| 2000 | 8  | 8  | 6  | 1  | ALBERTO | 17.0 | 44.9 | 70  | 982  |
| 2000 | 8  | 8  | 12 | 1  | ALBERTO | 17.7 | 45.7 | 70  | 985  |
| 2000 | 8  | 8  | 18 | 1  | ALBERTO | 18.6 | 46.5 | 65  | 987  |
| 2000 | 8  | 9  | 0  | 1  | ALBERTO | 19.6 | 47.2 | 60  | 989  |
| 2000 | 8  | 9  | 6  | 1  | ALBERTO | 20.6 | 48.5 | 60  | 992  |
| 2000 | 8  | 9  | 12 | 1  | ALBERTO | 21.9 | 49.9 | 55  | 994  |
| 2000 | 8  | 9  | 18 | 1  | ALBERTO | 23.4 | 51.3 | 60  | 991  |
| 2000 | 8  | 10 | 0  | 1  | ALBERTO | 24.8 | 52.6 | 65  | 988  |
| 2000 | 8  | 10 | 6  | 1  | ALBERTO | 26.1 | 54.0 | 65  | 987  |
| 2000 | 8  | 10 | 12 | 1  | ALBERTO | 27.5 | 55.3 | 65  | 986  |
| 2000 | 8  | 10 | 18 | 1  | ALBERTO | 28.8 | 56.7 | 65  | 984  |
| 2000 | 8  | 11 | 0  | 1  | ALBERTO | 29.9 | 57.7 | 70  | 982  |
| 2000 | 8  | 11 | 6  | 1  | ALBERTO | 31.1 | 58.4 | 75  | 979  |
| 2000 | 8  | 11 | 12 | 1  | ALBERTO | 32.2 | 58.6 | 80  | 976  |
| 2000 | 8  | 11 | 18 | 1  | ALBERTO | 33.3 | 58.5 | 85  | 973  |
| 2000 | 8  | 12 | 0  | 1  | ALBERTO | 34.3 | 58.0 | 90  | 970  |
| 2000 | 8  | 12 | 6  | 1  | ALBERTO | 35.1 | 56.7 | 100 | 960  |
| 2000 | 8  | 12 | 12 | 1  | ALBERTO | 35.9 | 55.3 | 110 | 950  |
| 2000 | 8  | 12 | 18 | 1  | ALBERTO | 36.8 | 53.8 | 110 | 954  |
| 2000 | 8  | 13 | 0  | 1  | ALBERTO | 37.4 | 52.0 | 105 | 958  |
| 2000 | 8  | 13 | 6  | 1  | ALBERTO | 38.0 | 50.3 | 95  | 966  |
| 2000 | 8  | 13 | 12 | 1  | ALBERTO | 38.4 | 48.3 | 85  | 973  |
| 2000 | 8  | 13 | 18 | 1  | ALBERTO | 38.8 | 46.3 | 75  | 980  |
| 2000 | 8  | 14 | 0  | 1  | ALBERTO | 39.0 | 44.2 | 65  | 987  |

|      |      |    |   |         |      |      |    |      |
|------|------|----|---|---------|------|------|----|------|
| 2000 | 8 14 | 6  | 1 | ALBERTO | 39.1 | 42.2 | 60 | 991  |
| 2000 | 8 14 | 12 | 1 | ALBERTO | 39.1 | 40.6 | 55 | 994  |
| 2000 | 8 14 | 18 | 1 | ALBERTO | 39.1 | 39.3 | 50 | 997  |
| 2000 | 8 15 | 0  | 1 | ALBERTO | 38.9 | 38.5 | 45 | 1000 |
| 2000 | 8 15 | 6  | 1 | ALBERTO | 38.3 | 38.5 | 45 | 1001 |
| 2000 | 8 15 | 12 | 1 | ALBERTO | 37.3 | 38.5 | 45 | 1002 |
| 2000 | 8 15 | 18 | 1 | ALBERTO | 36.6 | 38.9 | 40 | 1002 |
| 2000 | 8 16 | 0  | 1 | ALBERTO | 36.1 | 39.4 | 40 | 1003 |
| 2000 | 8 16 | 6  | 1 | ALBERTO | 35.4 | 40.2 | 40 | 1003 |
| 2000 | 8 16 | 12 | 1 | ALBERTO | 34.6 | 41.3 | 40 | 1003 |
| 2000 | 8 16 | 18 | 1 | ALBERTO | 33.9 | 42.4 | 40 | 1002 |
| 2000 | 8 17 | 0  | 1 | ALBERTO | 33.4 | 43.5 | 45 | 1001 |
| 2000 | 8 17 | 6  | 1 | ALBERTO | 33.0 | 44.2 | 45 | 1000 |
| 2000 | 8 17 | 12 | 1 | ALBERTO | 33.0 | 44.9 | 50 | 998  |
| 2000 | 8 17 | 18 | 1 | ALBERTO | 33.0 | 45.8 | 50 | 997  |
| 2000 | 8 18 | 0  | 1 | ALBERTO | 33.2 | 46.5 | 55 | 995  |
| 2000 | 8 18 | 6  | 1 | ALBERTO | 33.6 | 47.1 | 55 | 993  |
| 2000 | 8 18 | 12 | 1 | ALBERTO | 34.2 | 47.6 | 60 | 991  |
| 2000 | 8 18 | 18 | 1 | ALBERTO | 34.7 | 48.0 | 65 | 987  |
| 2000 | 8 19 | 0  | 1 | ALBERTO | 34.9 | 48.1 | 75 | 979  |
| 2000 | 8 19 | 6  | 1 | ALBERTO | 35.3 | 48.2 | 80 | 976  |
| 2000 | 8 19 | 12 | 1 | ALBERTO | 35.6 | 48.2 | 85 | 973  |
| 2000 | 8 19 | 18 | 1 | ALBERTO | 36.0 | 48.2 | 90 | 970  |
| 2000 | 8 20 | 0  | 1 | ALBERTO | 36.4 | 48.1 | 90 | 970  |
| 2000 | 8 20 | 6  | 1 | ALBERTO | 36.7 | 48.0 | 90 | 971  |
| 2000 | 8 20 | 12 | 1 | ALBERTO | 37.1 | 47.9 | 85 | 972  |
| 2000 | 8 20 | 18 | 1 | ALBERTO | 37.4 | 47.7 | 85 | 973  |
| 2000 | 8 21 | 0  | 1 | ALBERTO | 37.9 | 47.5 | 85 | 974  |
| 2000 | 8 21 | 6  | 1 | ALBERTO | 38.3 | 47.3 | 80 | 976  |
| 2000 | 8 21 | 12 | 1 | ALBERTO | 38.9 | 47.2 | 80 | 977  |
| 2000 | 8 21 | 18 | 1 | ALBERTO | 40.0 | 46.7 | 80 | 978  |
| 2000 | 8 22 | 0  | 1 | ALBERTO | 41.2 | 45.9 | 75 | 979  |
| 2000 | 8 22 | 6  | 1 | ALBERTO | 42.6 | 45.4 | 75 | 981  |
| 2000 | 8 22 | 12 | 1 | ALBERTO | 44.0 | 44.0 | 70 | 983  |
| 2000 | 8 22 | 18 | 1 | ALBERTO | 46.1 | 42.1 | 65 | 985  |
| 2000 | 8 23 | 0  | 1 | ALBERTO | 48.3 | 39.5 | 65 | 987  |
| 2000 | 8 23 | 6  | 1 | ALBERTO | 50.7 | 36.8 | 55 | 994  |
| 2000 | 8 23 | 12 | 1 | ALBERTO | 53.2 | 35.4 | 45 | 997  |
| 2000 | 8 23 | 18 | 1 | ALBERTO | 57.0 | 34.0 | 45 | 997  |
| 2000 | 8 24 | 0  | 1 | ALBERTO | 59.5 | 30.3 | 40 | 995  |
| 2000 | 8 24 | 6  | 1 | ALBERTO | 62.0 | 25.5 | 35 | 992  |
| 2000 | 8 24 | 12 | 1 | ALBERTO | 65.5 | 23.0 | 35 | 990  |
| 2000 | 8 24 | 18 | 1 | ALBERTO | 68.0 | 20.0 | 30 | 992  |
| 2000 | 8 25 | 0  | 1 | ALBERTO | 69.0 | 12.5 | 30 | 990  |

|      |      |    |           |      |      |    |      |
|------|------|----|-----------|------|------|----|------|
| 2000 | 8 25 | 6  | 1 ALBERTO | 70.7 | 4.9  | 30 | 994  |
| 2000 | 8 13 | 18 | 2 BERYL   | 22.5 | 93.5 | 30 | 1008 |
| 2000 | 8 14 | 0  | 2 BERYL   | 22.7 | 93.8 | 30 | 1008 |
| 2000 | 8 14 | 6  | 2 BERYL   | 23.1 | 94.6 | 35 | 1007 |
| 2000 | 8 14 | 12 | 2 BERYL   | 23.5 | 95.4 | 40 | 1009 |
| 2000 | 8 14 | 18 | 2 BERYL   | 23.9 | 96.3 | 45 | 1009 |
| 2000 | 8 15 | 0  | 2 BERYL   | 24.1 | 97.0 | 45 | 1007 |
| 2000 | 8 15 | 6  | 2 BERYL   | 24.5 | 97.7 | 45 | 1009 |
| 2000 | 8 15 | 12 | 2 BERYL   | 24.9 | 98.6 | 30 | 1010 |
| 2000 | 8 15 | 18 | 2 BERYL   | 25.2 | 99.8 | 25 | 1012 |
| 2000 | 8 17 | 12 | 3 CHRIS   | 14.2 | 51.9 | 25 | 1009 |
| 2000 | 8 17 | 18 | 3 CHRIS   | 14.7 | 52.8 | 25 | 1009 |
| 2000 | 8 18 | 0  | 3 CHRIS   | 15.2 | 53.4 | 25 | 1009 |
| 2000 | 8 18 | 6  | 3 CHRIS   | 15.6 | 54.1 | 30 | 1009 |
| 2000 | 8 18 | 12 | 3 CHRIS   | 16.2 | 55.4 | 35 | 1008 |
| 2000 | 8 18 | 18 | 3 CHRIS   | 16.8 | 56.5 | 30 | 1011 |
| 2000 | 8 19 | 0  | 3 CHRIS   | 17.3 | 57.7 | 25 | 1012 |
| 2000 | 8 19 | 6  | 3 CHRIS   | 17.8 | 59.0 | 25 | 1012 |
| 2000 | 8 19 | 12 | 3 CHRIS   | 18.3 | 60.4 | 20 | 1013 |
| 2000 | 8 19 | 18 | 4 DEBBY   | 12.0 | 44.5 | 30 | 1010 |
| 2000 | 8 20 | 0  | 4 DEBBY   | 12.6 | 45.3 | 30 | 1010 |
| 2000 | 8 20 | 6  | 4 DEBBY   | 13.3 | 46.8 | 35 | 1009 |
| 2000 | 8 20 | 12 | 4 DEBBY   | 14.0 | 48.8 | 40 | 1008 |
| 2000 | 8 20 | 18 | 4 DEBBY   | 14.7 | 50.6 | 45 | 1007 |
| 2000 | 8 21 | 0  | 4 DEBBY   | 15.1 | 52.1 | 55 | 1006 |
| 2000 | 8 21 | 6  | 4 DEBBY   | 15.4 | 54.0 | 65 | 1005 |
| 2000 | 8 21 | 12 | 4 DEBBY   | 15.7 | 56.3 | 75 | 1004 |
| 2000 | 8 21 | 18 | 4 DEBBY   | 16.1 | 58.5 | 75 | 1004 |
| 2000 | 8 22 | 0  | 4 DEBBY   | 16.8 | 60.1 | 70 | 995  |
| 2000 | 8 22 | 6  | 4 DEBBY   | 17.5 | 61.7 | 65 | 993  |
| 2000 | 8 22 | 12 | 4 DEBBY   | 18.1 | 63.5 | 65 | 994  |
| 2000 | 8 22 | 18 | 4 DEBBY   | 18.8 | 65.4 | 65 | 995  |
| 2000 | 8 23 | 0  | 4 DEBBY   | 19.2 | 66.7 | 65 | 995  |
| 2000 | 8 23 | 6  | 4 DEBBY   | 19.5 | 68.1 | 65 | 995  |
| 2000 | 8 23 | 12 | 4 DEBBY   | 19.8 | 69.7 | 60 | 1005 |
| 2000 | 8 23 | 18 | 4 DEBBY   | 20.0 | 71.5 | 50 | 1009 |
| 2000 | 8 24 | 0  | 4 DEBBY   | 19.9 | 73.3 | 40 | 1010 |
| 2000 | 8 24 | 6  | 4 DEBBY   | 19.6 | 75.1 | 35 | 1011 |
| 2000 | 8 24 | 12 | 4 DEBBY   | 19.5 | 77.0 | 30 | 1011 |
| 2000 | 9 1  | 12 | 5 ERNESTO | 14.8 | 45.2 | 25 | 1009 |
| 2000 | 9 1  | 18 | 5 ERNESTO | 15.0 | 47.0 | 30 | 1009 |
| 2000 | 9 2  | 0  | 5 ERNESTO | 15.6 | 48.3 | 30 | 1009 |
| 2000 | 9 2  | 6  | 5 ERNESTO | 16.2 | 49.5 | 35 | 1008 |
| 2000 | 9 2  | 12 | 5 ERNESTO | 16.9 | 50.8 | 35 | 1008 |

|      |   |    |    |   |          |      |      |    |      |
|------|---|----|----|---|----------|------|------|----|------|
| 2000 | 9 | 2  | 18 | 5 | ERNESTO  | 17.5 | 52.1 | 35 | 1008 |
| 2000 | 9 | 3  | 0  | 5 | ERNESTO  | 18.2 | 53.6 | 35 | 1008 |
| 2000 | 9 | 3  | 6  | 5 | ERNESTO  | 18.8 | 55.0 | 35 | 1008 |
| 2000 | 9 | 3  | 12 | 5 | ERNESTO  | 19.4 | 56.6 | 35 | 1008 |
| 2000 | 9 | 3  | 18 | 5 | ERNESTO  | 20.0 | 58.0 | 30 | 1009 |
| 2000 | 9 | 10 | 18 | 6 | FLORENCE | 30.9 | 70.9 | 30 | 1007 |
| 2000 | 9 | 11 | 0  | 6 | FLORENCE | 30.8 | 71.3 | 30 | 1007 |
| 2000 | 9 | 11 | 6  | 6 | FLORENCE | 30.7 | 71.8 | 30 | 1006 |
| 2000 | 9 | 11 | 12 | 6 | FLORENCE | 30.4 | 72.2 | 45 | 1002 |
| 2000 | 9 | 11 | 18 | 6 | FLORENCE | 30.1 | 72.6 | 65 | 998  |
| 2000 | 9 | 12 | 0  | 6 | FLORENCE | 30.1 | 72.7 | 65 | 992  |
| 2000 | 9 | 12 | 6  | 6 | FLORENCE | 30.2 | 72.8 | 60 | 993  |
| 2000 | 9 | 12 | 12 | 6 | FLORENCE | 30.3 | 73.1 | 60 | 991  |
| 2000 | 9 | 12 | 18 | 6 | FLORENCE | 30.6 | 73.3 | 65 | 987  |
| 2000 | 9 | 13 | 0  | 6 | FLORENCE | 30.8 | 73.7 | 65 | 986  |
| 2000 | 9 | 13 | 6  | 6 | FLORENCE | 30.7 | 74.0 | 65 | 986  |
| 2000 | 9 | 13 | 12 | 6 | FLORENCE | 30.7 | 73.8 | 60 | 987  |
| 2000 | 9 | 13 | 18 | 6 | FLORENCE | 30.5 | 73.7 | 55 | 989  |
| 2000 | 9 | 14 | 0  | 6 | FLORENCE | 30.2 | 73.6 | 50 | 991  |
| 2000 | 9 | 14 | 6  | 6 | FLORENCE | 29.6 | 73.6 | 45 | 993  |
| 2000 | 9 | 14 | 12 | 6 | FLORENCE | 29.5 | 73.4 | 45 | 994  |
| 2000 | 9 | 14 | 18 | 6 | FLORENCE | 29.3 | 73.1 | 45 | 995  |
| 2000 | 9 | 15 | 0  | 6 | FLORENCE | 29.2 | 72.8 | 45 | 995  |
| 2000 | 9 | 15 | 6  | 6 | FLORENCE | 29.1 | 72.4 | 45 | 996  |
| 2000 | 9 | 15 | 12 | 6 | FLORENCE | 29.8 | 71.2 | 50 | 997  |
| 2000 | 9 | 15 | 18 | 6 | FLORENCE | 30.1 | 69.7 | 60 | 997  |
| 2000 | 9 | 16 | 0  | 6 | FLORENCE | 30.8 | 67.5 | 65 | 994  |
| 2000 | 9 | 16 | 6  | 6 | FLORENCE | 32.6 | 66.1 | 65 | 988  |
| 2000 | 9 | 16 | 12 | 6 | FLORENCE | 34.3 | 64.2 | 65 | 987  |
| 2000 | 9 | 16 | 18 | 6 | FLORENCE | 36.1 | 61.8 | 70 | 985  |
| 2000 | 9 | 17 | 0  | 6 | FLORENCE | 37.9 | 59.5 | 60 | 990  |
| 2000 | 9 | 17 | 6  | 6 | FLORENCE | 40.1 | 57.4 | 55 | 995  |
| 2000 | 9 | 17 | 12 | 6 | FLORENCE | 42.5 | 55.0 | 50 | 1000 |
| 2000 | 9 | 17 | 18 | 6 | FLORENCE | 45.5 | 53.0 | 50 | 1002 |
| 2000 | 9 | 14 | 12 | 7 | GORDON   | 19.8 | 87.3 | 25 | 1008 |
| 2000 | 9 | 14 | 18 | 7 | GORDON   | 20.4 | 87.4 | 25 | 1007 |
| 2000 | 9 | 15 | 0  | 7 | GORDON   | 20.7 | 87.7 | 25 | 1007 |
| 2000 | 9 | 15 | 6  | 7 | GORDON   | 21.0 | 88.0 | 25 | 1006 |
| 2000 | 9 | 15 | 12 | 7 | GORDON   | 21.4 | 88.7 | 25 | 1004 |
| 2000 | 9 | 15 | 18 | 7 | GORDON   | 21.6 | 87.8 | 30 | 1004 |
| 2000 | 9 | 16 | 0  | 7 | GORDON   | 22.5 | 86.7 | 40 | 1000 |
| 2000 | 9 | 16 | 6  | 7 | GORDON   | 22.9 | 86.6 | 50 | 997  |
| 2000 | 9 | 16 | 12 | 7 | GORDON   | 23.5 | 86.3 | 55 | 992  |
| 2000 | 9 | 16 | 18 | 7 | GORDON   | 24.3 | 85.9 | 60 | 983  |

|      |      |    |   |        |      |      |    |      |
|------|------|----|---|--------|------|------|----|------|
| 2000 | 9 17 | 0  | 7 | GORDON | 25.2 | 85.4 | 65 | 985  |
| 2000 | 9 17 | 6  | 7 | GORDON | 26.1 | 84.9 | 70 | 981  |
| 2000 | 9 17 | 12 | 7 | GORDON | 27.1 | 84.3 | 65 | 987  |
| 2000 | 9 17 | 18 | 7 | GORDON | 28.0 | 83.8 | 65 | 985  |
| 2000 | 9 18 | 0  | 7 | GORDON | 28.9 | 83.4 | 60 | 989  |
| 2000 | 9 18 | 6  | 7 | GORDON | 29.8 | 83.0 | 40 | 1000 |
| 2000 | 9 18 | 12 | 7 | GORDON | 31.0 | 82.3 | 30 | 1006 |
| 2000 | 9 18 | 18 | 7 | GORDON | 32.3 | 81.5 | 25 | 1011 |
| 2000 | 9 19 | 0  | 7 | GORDON | 33.5 | 80.2 | 25 | 1011 |
| 2000 | 9 19 | 6  | 7 | GORDON | 35.0 | 79.0 | 20 | 1011 |
| 2000 | 9 19 | 12 | 7 | GORDON | 37.0 | 78.2 | 20 | 1010 |
| 2000 | 9 19 | 18 | 7 | GORDON | 38.5 | 76.0 | 25 | 1008 |
| 2000 | 9 20 | 0  | 7 | GORDON | 40.0 | 74.0 | 25 | 1007 |
| 2000 | 9 20 | 6  | 7 | GORDON | 41.5 | 72.0 | 25 | 1005 |
| 2000 | 9 20 | 12 | 7 | GORDON | 42.0 | 69.5 | 30 | 1005 |
| 2000 | 9 20 | 18 | 7 | GORDON | 42.5 | 67.2 | 30 | 1005 |
| 2000 | 9 21 | 0  | 7 | GORDON | 43.0 | 65.0 | 30 | 1004 |
| 2000 | 9 21 | 6  | 7 | GORDON | 43.5 | 63.0 | 30 | 1003 |
| 2000 | 9 15 | 12 | 8 | HELENE | 14.9 | 52.2 | 25 | 1010 |
| 2000 | 9 15 | 18 | 8 | HELENE | 15.3 | 53.0 | 25 | 1010 |
| 2000 | 9 16 | 0  | 8 | HELENE | 15.6 | 53.6 | 25 | 1010 |
| 2000 | 9 16 | 6  | 8 | HELENE | 15.8 | 54.4 | 25 | 1010 |
| 2000 | 9 16 | 12 | 8 | HELENE | 16.1 | 55.9 | 30 | 1010 |
| 2000 | 9 16 | 18 | 8 | HELENE | 16.4 | 58.0 | 30 | 1010 |
| 2000 | 9 17 | 0  | 8 | HELENE | 16.6 | 59.9 | 30 | 1010 |
| 2000 | 9 17 | 6  | 8 | HELENE | 16.6 | 61.7 | 30 | 1010 |
| 2000 | 9 17 | 12 | 8 | HELENE | 16.4 | 63.6 | 30 | 1010 |
| 2000 | 9 17 | 18 | 8 | HELENE | 16.7 | 65.6 | 30 | 1010 |
| 2000 | 9 18 | 0  | 8 | HELENE | 17.0 | 67.1 | 30 | 1010 |
| 2000 | 9 18 | 6  | 8 | HELENE | 17.1 | 68.7 | 30 | 1010 |
| 2000 | 9 18 | 12 | 8 | HELENE | 17.2 | 70.6 | 30 | 1010 |
| 2000 | 9 18 | 18 | 8 | HELENE | 17.4 | 72.5 | 30 | 1010 |
| 2000 | 9 19 | 0  | 8 | HELENE | 17.6 | 74.4 | 30 | 1010 |
| 2000 | 9 19 | 6  | 8 | HELENE | 18.3 | 76.3 | 30 | 1010 |
| 2000 | 9 19 | 12 | 8 | HELENE | 18.9 | 78.3 | 30 | 1010 |
| 2000 | 9 19 | 18 | 8 | HELENE | 19.4 | 79.6 | 30 | 1010 |
| 2000 | 9 20 | 0  | 8 | HELENE | 19.9 | 81.0 | 30 | 1010 |
| 2000 | 9 20 | 6  | 8 | HELENE | 20.7 | 82.6 | 25 | 1010 |
| 2000 | 9 20 | 12 | 8 | HELENE | 21.8 | 84.3 | 25 | 1010 |
| 2000 | 9 20 | 18 | 8 | HELENE | 23.0 | 85.4 | 25 | 1010 |
| 2000 | 9 21 | 0  | 8 | HELENE | 23.9 | 86.1 | 25 | 1008 |
| 2000 | 9 21 | 6  | 8 | HELENE | 24.9 | 86.6 | 35 | 1007 |
| 2000 | 9 21 | 12 | 8 | HELENE | 26.1 | 87.0 | 45 | 1006 |
| 2000 | 9 21 | 18 | 8 | HELENE | 27.1 | 87.1 | 60 | 999  |

|      |      |    |          |      |      |     |      |
|------|------|----|----------|------|------|-----|------|
| 2000 | 9 22 | 0  | 8 HELENE | 28.4 | 87.2 | 60  | 996  |
| 2000 | 9 22 | 6  | 8 HELENE | 29.5 | 87.2 | 50  | 1001 |
| 2000 | 9 22 | 12 | 8 HELENE | 30.5 | 86.6 | 35  | 1006 |
| 2000 | 9 22 | 18 | 8 HELENE | 31.6 | 85.4 | 25  | 1010 |
| 2000 | 9 23 | 0  | 8 HELENE | 32.9 | 83.5 | 25  | 1011 |
| 2000 | 9 23 | 6  | 8 HELENE | 33.6 | 81.7 | 25  | 1012 |
| 2000 | 9 23 | 12 | 8 HELENE | 34.4 | 80.0 | 25  | 1011 |
| 2000 | 9 23 | 18 | 8 HELENE | 35.4 | 78.0 | 35  | 1010 |
| 2000 | 9 24 | 0  | 8 HELENE | 36.4 | 76.1 | 40  | 1008 |
| 2000 | 9 24 | 6  | 8 HELENE | 37.2 | 74.7 | 45  | 1005 |
| 2000 | 9 24 | 12 | 8 HELENE | 38.0 | 72.5 | 45  | 1001 |
| 2000 | 9 24 | 18 | 8 HELENE | 39.2 | 70.1 | 45  | 997  |
| 2000 | 9 25 | 0  | 8 HELENE | 40.1 | 66.8 | 55  | 993  |
| 2000 | 9 25 | 6  | 8 HELENE | 41.6 | 62.2 | 60  | 986  |
| 2000 | 9 25 | 12 | 8 HELENE | 44.0 | 55.5 | 55  | 988  |
| 2000 | 9 25 | 18 | 8 HELENE | 46.1 | 48.8 | 45  | 990  |
| 2000 | 9 21 | 12 | 9 ISAAC  | 11.5 | 23.0 | 30  | 1008 |
| 2000 | 9 21 | 18 | 9 ISAAC  | 11.9 | 24.5 | 30  | 1008 |
| 2000 | 9 22 | 0  | 9 ISAAC  | 12.3 | 25.9 | 35  | 1005 |
| 2000 | 9 22 | 6  | 9 ISAAC  | 12.7 | 27.2 | 40  | 1001 |
| 2000 | 9 22 | 12 | 9 ISAAC  | 13.1 | 28.7 | 45  | 1000 |
| 2000 | 9 22 | 18 | 9 ISAAC  | 13.5 | 30.1 | 45  | 1000 |
| 2000 | 9 23 | 0  | 9 ISAAC  | 13.7 | 31.2 | 50  | 997  |
| 2000 | 9 23 | 6  | 9 ISAAC  | 13.9 | 32.3 | 55  | 994  |
| 2000 | 9 23 | 12 | 9 ISAAC  | 14.3 | 33.2 | 70  | 984  |
| 2000 | 9 23 | 18 | 9 ISAAC  | 14.6 | 34.2 | 85  | 973  |
| 2000 | 9 24 | 0  | 9 ISAAC  | 14.9 | 35.0 | 105 | 960  |
| 2000 | 9 24 | 6  | 9 ISAAC  | 15.1 | 35.8 | 100 | 960  |
| 2000 | 9 24 | 12 | 9 ISAAC  | 15.5 | 36.8 | 100 | 960  |
| 2000 | 9 24 | 18 | 9 ISAAC  | 15.8 | 37.8 | 100 | 960  |
| 2000 | 9 25 | 0  | 9 ISAAC  | 16.3 | 38.6 | 95  | 965  |
| 2000 | 9 25 | 6  | 9 ISAAC  | 16.7 | 39.5 | 95  | 965  |
| 2000 | 9 25 | 12 | 9 ISAAC  | 17.2 | 40.4 | 90  | 970  |
| 2000 | 9 25 | 18 | 9 ISAAC  | 17.6 | 41.2 | 90  | 970  |
| 2000 | 9 26 | 0  | 9 ISAAC  | 17.9 | 42.0 | 90  | 970  |
| 2000 | 9 26 | 6  | 9 ISAAC  | 18.3 | 42.9 | 85  | 973  |
| 2000 | 9 26 | 12 | 9 ISAAC  | 18.6 | 43.9 | 75  | 980  |
| 2000 | 9 26 | 18 | 9 ISAAC  | 19.1 | 45.0 | 75  | 980  |
| 2000 | 9 27 | 0  | 9 ISAAC  | 19.6 | 46.0 | 80  | 977  |
| 2000 | 9 27 | 6  | 9 ISAAC  | 20.4 | 47.0 | 85  | 973  |
| 2000 | 9 27 | 12 | 9 ISAAC  | 21.0 | 48.1 | 90  | 970  |
| 2000 | 9 27 | 18 | 9 ISAAC  | 21.9 | 49.5 | 95  | 965  |
| 2000 | 9 28 | 0  | 9 ISAAC  | 22.8 | 50.6 | 100 | 960  |
| 2000 | 9 28 | 6  | 9 ISAAC  | 23.8 | 52.0 | 105 | 955  |



|      |    |    |    |    |       |      |      |     |      |
|------|----|----|----|----|-------|------|------|-----|------|
| 2000 | 9  | 28 | 12 | 9  | ISAAC | 25.0 | 52.9 | 110 | 950  |
| 2000 | 9  | 28 | 18 | 9  | ISAAC | 26.6 | 54.2 | 120 | 943  |
| 2000 | 9  | 29 | 0  | 9  | ISAAC | 28.0 | 55.1 | 115 | 948  |
| 2000 | 9  | 29 | 6  | 9  | ISAAC | 29.7 | 55.9 | 110 | 950  |
| 2000 | 9  | 29 | 12 | 9  | ISAAC | 31.2 | 56.2 | 105 | 955  |
| 2000 | 9  | 29 | 18 | 9  | ISAAC | 32.9 | 55.9 | 90  | 965  |
| 2000 | 9  | 30 | 0  | 9  | ISAAC | 34.4 | 55.2 | 85  | 970  |
| 2000 | 9  | 30 | 6  | 9  | ISAAC | 35.7 | 54.0 | 80  | 975  |
| 2000 | 9  | 30 | 12 | 9  | ISAAC | 37.0 | 51.8 | 75  | 979  |
| 2000 | 9  | 30 | 18 | 9  | ISAAC | 38.3 | 49.8 | 70  | 985  |
| 2000 | 10 | 1  | 0  | 9  | ISAAC | 39.7 | 47.9 | 65  | 987  |
| 2000 | 10 | 1  | 6  | 9  | ISAAC | 40.9 | 45.7 | 60  | 990  |
| 2000 | 10 | 1  | 12 | 9  | ISAAC | 42.1 | 43.6 | 55  | 990  |
| 2000 | 10 | 1  | 18 | 9  | ISAAC | 43.5 | 39.5 | 55  | 990  |
| 2000 | 10 | 2  | 0  | 9  | ISAAC | 44.5 | 36.5 | 55  | 982  |
| 2000 | 10 | 2  | 6  | 9  | ISAAC | 45.7 | 33.0 | 60  | 972  |
| 2000 | 10 | 2  | 12 | 9  | ISAAC | 47.0 | 29.0 | 60  | 975  |
| 2000 | 10 | 2  | 18 | 9  | ISAAC | 48.5 | 25.0 | 60  | 976  |
| 2000 | 10 | 3  | 0  | 9  | ISAAC | 49.5 | 20.5 | 60  | 976  |
| 2000 | 10 | 3  | 6  | 9  | ISAAC | 50.5 | 16.5 | 60  | 978  |
| 2000 | 10 | 3  | 12 | 9  | ISAAC | 52.0 | 12.0 | 55  | 982  |
| 2000 | 10 | 3  | 18 | 9  | ISAAC | 55.0 | 9.0  | 45  | 988  |
| 2000 | 10 | 4  | 0  | 9  | ISAAC | 58.0 | 6.0  | 45  | 989  |
| 2000 | 10 | 4  | 6  | 9  | ISAAC | 62.0 | 4.0  | 45  | 994  |
| 2000 | 9  | 25 | 12 | 10 | JOYCE | 11.2 | 29.6 | 25  | 1009 |
| 2000 | 9  | 25 | 18 | 10 | JOYCE | 11.4 | 30.7 | 30  | 1009 |
| 2000 | 9  | 26 | 0  | 10 | JOYCE | 11.5 | 31.9 | 35  | 1008 |
| 2000 | 9  | 26 | 6  | 10 | JOYCE | 11.6 | 33.0 | 35  | 1007 |
| 2000 | 9  | 26 | 12 | 10 | JOYCE | 11.6 | 34.1 | 35  | 1005 |
| 2000 | 9  | 26 | 18 | 10 | JOYCE | 11.7 | 35.3 | 40  | 1002 |
| 2000 | 9  | 27 | 0  | 10 | JOYCE | 12.1 | 36.4 | 50  | 998  |
| 2000 | 9  | 27 | 6  | 10 | JOYCE | 12.2 | 37.6 | 55  | 993  |
| 2000 | 9  | 27 | 12 | 10 | JOYCE | 12.4 | 38.8 | 65  | 985  |
| 2000 | 9  | 27 | 18 | 10 | JOYCE | 12.5 | 40.1 | 70  | 978  |
| 2000 | 9  | 28 | 0  | 10 | JOYCE | 12.4 | 41.3 | 75  | 976  |
| 2000 | 9  | 28 | 6  | 10 | JOYCE | 12.2 | 42.5 | 80  | 975  |
| 2000 | 9  | 28 | 12 | 10 | JOYCE | 11.7 | 43.8 | 80  | 975  |
| 2000 | 9  | 28 | 18 | 10 | JOYCE | 11.3 | 45.0 | 75  | 976  |
| 2000 | 9  | 29 | 0  | 10 | JOYCE | 10.9 | 46.1 | 75  | 977  |
| 2000 | 9  | 29 | 6  | 10 | JOYCE | 10.7 | 47.2 | 70  | 980  |
| 2000 | 9  | 29 | 12 | 10 | JOYCE | 10.5 | 48.6 | 65  | 984  |
| 2000 | 9  | 29 | 18 | 10 | JOYCE | 10.5 | 50.1 | 60  | 988  |
| 2000 | 9  | 30 | 0  | 10 | JOYCE | 10.4 | 51.7 | 55  | 992  |
| 2000 | 9  | 30 | 6  | 10 | JOYCE | 10.3 | 53.3 | 50  | 996  |

|      |    |    |    |    |        |      |       |     |      |
|------|----|----|----|----|--------|------|-------|-----|------|
| 2000 | 9  | 30 | 12 | 10 | JOYCE  | 10.3 | 54.9  | 45  | 1000 |
| 2000 | 9  | 30 | 18 | 10 | JOYCE  | 10.5 | 56.6  | 40  | 1003 |
| 2000 | 10 | 1  | 0  | 10 | JOYCE  | 10.7 | 58.0  | 40  | 1005 |
| 2000 | 10 | 1  | 6  | 10 | JOYCE  | 11.0 | 59.5  | 35  | 1006 |
| 2000 | 10 | 1  | 12 | 10 | JOYCE  | 11.3 | 60.9  | 35  | 1007 |
| 2000 | 10 | 1  | 18 | 10 | JOYCE  | 11.7 | 62.3  | 30  | 1008 |
| 2000 | 10 | 2  | 0  | 10 | JOYCE  | 11.9 | 63.5  | 30  | 1009 |
| 2000 | 10 | 2  | 6  | 10 | JOYCE  | 11.9 | 64.9  | 25  | 1009 |
| 2000 | 9  | 28 | 18 | 11 | KEITH  | 16.1 | 82.9  | 25  | 1005 |
| 2000 | 9  | 29 | 0  | 11 | KEITH  | 16.2 | 83.3  | 25  | 1004 |
| 2000 | 9  | 29 | 6  | 11 | KEITH  | 16.6 | 83.6  | 30  | 1003 |
| 2000 | 9  | 29 | 12 | 11 | KEITH  | 16.9 | 84.0  | 30  | 1002 |
| 2000 | 9  | 29 | 18 | 11 | KEITH  | 17.4 | 84.8  | 40  | 1000 |
| 2000 | 9  | 30 | 0  | 11 | KEITH  | 17.7 | 85.4  | 45  | 993  |
| 2000 | 9  | 30 | 6  | 11 | KEITH  | 17.9 | 86.0  | 55  | 987  |
| 2000 | 9  | 30 | 12 | 11 | KEITH  | 17.9 | 86.4  | 65  | 982  |
| 2000 | 9  | 30 | 18 | 11 | KEITH  | 17.9 | 86.7  | 75  | 977  |
| 2000 | 10 | 1  | 0  | 11 | KEITH  | 17.9 | 86.9  | 100 | 955  |
| 2000 | 10 | 1  | 6  | 11 | KEITH  | 17.9 | 87.2  | 120 | 941  |
| 2000 | 10 | 1  | 12 | 11 | KEITH  | 17.9 | 87.4  | 115 | 944  |
| 2000 | 10 | 1  | 18 | 11 | KEITH  | 17.9 | 87.7  | 110 | 950  |
| 2000 | 10 | 2  | 0  | 11 | KEITH  | 17.8 | 87.9  | 100 | 959  |
| 2000 | 10 | 2  | 6  | 11 | KEITH  | 17.6 | 87.8  | 80  | 974  |
| 2000 | 10 | 2  | 12 | 11 | KEITH  | 17.7 | 87.8  | 70  | 980  |
| 2000 | 10 | 2  | 18 | 11 | KEITH  | 17.7 | 87.9  | 65  | 987  |
| 2000 | 10 | 3  | 0  | 11 | KEITH  | 17.9 | 88.0  | 60  | 989  |
| 2000 | 10 | 3  | 6  | 11 | KEITH  | 18.0 | 88.4  | 45  | 990  |
| 2000 | 10 | 3  | 12 | 11 | KEITH  | 18.3 | 88.8  | 30  | 995  |
| 2000 | 10 | 3  | 18 | 11 | KEITH  | 18.6 | 89.5  | 30  | 998  |
| 2000 | 10 | 4  | 0  | 11 | KEITH  | 19.0 | 90.4  | 25  | 1000 |
| 2000 | 10 | 4  | 6  | 11 | KEITH  | 19.5 | 91.4  | 30  | 1000 |
| 2000 | 10 | 4  | 12 | 11 | KEITH  | 19.9 | 92.5  | 35  | 999  |
| 2000 | 10 | 4  | 18 | 11 | KEITH  | 20.3 | 93.5  | 40  | 996  |
| 2000 | 10 | 5  | 0  | 11 | KEITH  | 20.7 | 94.8  | 60  | 988  |
| 2000 | 10 | 5  | 6  | 11 | KEITH  | 21.2 | 96.1  | 65  | 987  |
| 2000 | 10 | 5  | 12 | 11 | KEITH  | 21.8 | 97.0  | 75  | 983  |
| 2000 | 10 | 5  | 18 | 11 | KEITH  | 22.6 | 97.9  | 80  | 980  |
| 2000 | 10 | 6  | 0  | 11 | KEITH  | 23.2 | 99.0  | 45  | 988  |
| 2000 | 10 | 6  | 6  | 11 | KEITH  | 23.5 | 100.0 | 30  | 1002 |
| 2000 | 10 | 6  | 12 | 11 | KEITH  | 23.8 | 101.0 | 20  | 1007 |
| 2000 | 10 | 4  | 12 | 12 | LESLIE | 29.0 | 81.4  | 30  | 1012 |
| 2000 | 10 | 4  | 18 | 12 | LESLIE | 29.5 | 80.8  | 30  | 1012 |
| 2000 | 10 | 5  | 0  | 12 | LESLIE | 29.7 | 79.9  | 30  | 1010 |
| 2000 | 10 | 5  | 6  | 12 | LESLIE | 29.8 | 78.6  | 30  | 1010 |

|                  |         |        |      |         |         |
|------------------|---------|--------|------|---------|---------|
| 2000 10          | 5 12 12 | LESLIE | 29.9 | 77.3    | 35 1009 |
| 2000 10          | 5 18 12 | LESLIE | 30.2 | 75.9    | 35 1009 |
| 2000 10          | 6 0 12  | LESLIE | 30.3 | 74.3    | 35 1010 |
| 2000 10          | 6 6 12  | LESLIE | 30.6 | 73.1    | 40 1006 |
| 2000 10          | 6 12 12 | LESLIE | 30.9 | 72.4    | 40 1007 |
| 2000 10          | 6 18 12 | LESLIE | 31.3 | 71.8    | 40 1007 |
| 2000 10          | 7 0 12  | LESLIE | 32.1 | 70.7    | 40 1006 |
| 2000 10          | 7 6 12  | LESLIE | 33.1 | 69.6    | 40 1006 |
| 2000 10          | 7 12 12 | LESLIE | 35.4 | 68.3    | 40 1006 |
| 2000 10          | 7 18 12 | LESLIE | 37.4 | 66.7    | 40 1005 |
| 2000 10          | 8 0 12  | LESLIE | 40.0 | 64.0    | 40 1004 |
| 2000 10          | 8 6 12  | LESLIE | 43.0 | 60.0    | 40 1003 |
| 2000 10          | 8 12 12 | LESLIE | 46.0 | 57.0    | 40 1003 |
| 2000 10          | 8 18 12 | LESLIE | 49.0 | 54.0    | 35 1005 |
| 2000 10          | 9 0 12  | LESLIE | 51.0 | 50.0    | 35 1007 |
| 2000 10          | 9 6 12  | LESLIE | 53.0 | 46.0    | 35 1006 |
| 2000 10          | 9 12 12 | LESLIE | 55.0 | 41.0    | 35 1005 |
| 2000 10          | 9 18 12 | LESLIE | 56.0 | 36.0    | 35 1003 |
| 2000 10 10       | 0 12    | LESLIE | 56.0 | 30.0    | 40 999  |
| 2000 10 10       | 6 12    | LESLIE | 55.0 | 24.0    | 50 987  |
| 2000 10 10 12 12 | LESLIE  | 54.0   | 17.0 | 55 980  |         |
| 2000 10 10 18 12 | LESLIE  | 53.0   | 10.0 | 60 973  |         |
| 2000 10 15 12 13 | MICHAEL | 30.0   | 71.2 | 30 1007 |         |
| 2000 10 15 18 13 | MICHAEL | 30.0   | 71.5 | 30 1006 |         |
| 2000 10 16 0 13  | MICHAEL | 29.9   | 71.8 | 35 1005 |         |
| 2000 10 16 6 13  | MICHAEL | 29.9   | 71.9 | 35 1005 |         |
| 2000 10 16 12 13 | MICHAEL | 29.7   | 71.7 | 35 1005 |         |
| 2000 10 16 18 13 | MICHAEL | 29.8   | 71.4 | 35 1004 |         |
| 2000 10 17 0 13  | MICHAEL | 29.9   | 71.1 | 35 1003 |         |
| 2000 10 17 6 13  | MICHAEL | 29.8   | 71.0 | 45 1000 |         |
| 2000 10 17 12 13 | MICHAEL | 29.8   | 70.9 | 55 995  |         |
| 2000 10 17 18 13 | MICHAEL | 30.1   | 70.9 | 65 988  |         |
| 2000 10 18 0 13  | MICHAEL | 30.4   | 70.9 | 65 988  |         |
| 2000 10 18 6 13  | MICHAEL | 30.8   | 70.8 | 65 986  |         |
| 2000 10 18 12 13 | MICHAEL | 31.5   | 70.4 | 65 984  |         |
| 2000 10 18 18 13 | MICHAEL | 32.6   | 69.5 | 70 979  |         |
| 2000 10 19 0 13  | MICHAEL | 34.2   | 67.8 | 75 983  |         |
| 2000 10 19 6 13  | MICHAEL | 36.3   | 65.5 | 65 986  |         |
| 2000 10 19 12 13 | MICHAEL | 39.8   | 61.6 | 75 979  |         |
| 2000 10 19 18 13 | MICHAEL | 44.0   | 58.5 | 85 965  |         |
| 2000 10 20 0 13  | MICHAEL | 48.0   | 56.5 | 75 966  |         |
| 2000 10 20 6 13  | MICHAEL | 50.0   | 56.0 | 70 966  |         |
| 2000 10 20 12 13 | MICHAEL | 51.0   | 53.5 | 65 968  |         |
| 2000 10 20 18 13 | MICHAEL | 52.0   | 50.5 | 60 970  |         |

|                             |      |       |           |
|-----------------------------|------|-------|-----------|
| 2000 10 19 12 14 NADINE     | 26.2 | 59.9  | 25 1009   |
| 2000 10 19 18 14 NADINE     | 27.5 | 59.4  | 30 1008   |
| 2000 10 20 0 14 NADINE      | 28.7 | 58.8  | 30 1008   |
| 2000 10 20 6 14 NADINE      | 29.7 | 58.0  | 30 1005   |
| 2000 10 20 12 14 NADINE     | 30.4 | 57.2  | 35 1003   |
| 2000 10 20 18 14 NADINE     | 31.4 | 56.3  | 40 1000   |
| 2000 10 21 0 14 NADINE      | 32.4 | 55.2  | 50 999    |
| 2000 10 21 6 14 NADINE      | 33.3 | 53.5  | 50 1000   |
| 2000 10 21 12 14 NADINE     | 34.1 | 52.3  | 50 1000   |
| 2000 10 21 18 14 NADINE     | 34.8 | 51.3  | 45 1000   |
| 2000 10 22 0 14 NADINE      | 35.7 | 50.5  | 40 1004   |
| 2000 10 22 6 14 NADINE      | 37.0 | 49.0  | 40 1005   |
| 2000 10 22 12 14 NADINE     | 39.0 | 47.0  | 35 1005   |
| 2000 10 25 0 15 SUBTROP     | 21.5 | 69.5  | 30 1009   |
| 2000 10 25 6 15 SUBTROP     | 22.5 | 70.0  | 35 1007   |
| 2000 10 25 12 15 SUBTROP    | 23.5 | 70.9  | 35 1006   |
| 2000 10 25 18 15 SUBTROP    | 24.5 | 71.7  | 35 1005   |
| 2000 10 26 0 15 SUBTROP     | 25.7 | 71.7  | 35 1004   |
| 2000 10 26 6 15 SUBTROP     | 26.6 | 71.7  | 35 1003   |
| 2000 10 26 12 15 SUBTROP    | 27.4 | 71.8  | 40 1002   |
| 2000 10 26 18 15 SUBTROP    | 28.3 | 72.1  | 45 1000   |
| 2000 10 27 0 15 SUBTROP     | 29.2 | 72.5  | 50 997    |
| 2000 10 27 6 15 SUBTROP     | 30.0 | 72.6  | 50 997    |
| 2000 10 27 12 15 SUBTROP    | 30.9 | 72.5  | 50 997    |
| 2000 10 27 18 15 SUBTROP    | 32.6 | 71.6  | 50 996    |
| 2000 10 28 0 15 SUBTROP     | 34.2 | 70.7  | 50 994    |
| 2000 10 28 6 15 SUBTROP     | 35.7 | 69.9  | 50 992    |
| 2000 10 28 12 15 SUBTROP    | 36.5 | 68.1  | 50 990    |
| 2000 10 28 18 15 SUBTROP    | 38.0 | 65.5  | 55 984    |
| 2000 10 29 0 15 SUBTROP     | 40.5 | 62.6  | 55 978    |
| 2000 10 29 6 15 SUBTROP     | 44.0 | 60.0  | 50 980    |
| 2000 10 29 12 15 SUBTROP    | 46.0 | 59.5  | 45 992    |
| 0000 00 00 00 00 0000000000 | 00.0 | 000.0 | 0000 0000 |
